# Supplementary material for: Exploring the Role of Platelets in Virus-Induced Inflammatory Demyelinating Disease and Myocarditis
Source: Int J Mol Sci. 2024 Mar 19;25(6):3460. doi: 10.3390/ijms25063460 (PMC10970283; doi:10.3390/ijms25063460)
Supplement: Supplementary file 1 [file ijms-25-03460-s001.zip]

Archive with 7 entries (7 files):
- Supplemental Material Figures S1-S Table S1.pdf
- Supplemental Table S2.xlsx
- Supplemental Table S3.xlsx
- Supplemental Table S4.xlsx
- Supplemental Table S5.xlsx
- Supplemental Table S6.xlsx
- Supplemental Table S7.xlsx
