# Supplementary material for: Exploring the Role of Platelets in Virus-Induced Inflammatory Demyelinating Disease and Myocarditis
Source: Int J Mol Sci. 2024 Mar 19;25(6):3460. doi: 10.3390/ijms25063460 (PMC10970283; doi:10.3390/ijms25063460)
Supplement: Supplementary file 1 [file ijms-25-03460-s001.zip › Supplemental Table S2.xlsx]

## Sheet: Table S2A
Table S2A. DAVID functional clustering of differential expressed genes (DEGs) (P < 0.05) in the spleens of TMEV-infected mice on day 4 post infection (p.i.)
Cluster	Pathway	Enrichment Score	Genes
1	Zinc finger C2H2-type/integrase DNA-binding domain	11.1271	Gm14434, Zfp790, Zbtb1, Zfp811, Zfp518a, Gm2026, Zfp180, Zfp882, Zfp825, Zfp503, Gm14399, Zfp846, Dnajc21, Zfp644, Zfp668, Zfp369, Gm2007, Zfp994, Gm15446, Zfp111, 9130019O22Rik, Zfp943, Zfp14, Zfp719 Zfp709, Zfp866, Gm14410, Zfp267, Zfp12, Zfp456, Zfp317, Zfp974, Zfp87, Zfp82, Zfp677, Rbak, Zfp1001, 2610021A01Rik, Zfp971, Zfp60, Prdm9, Zfp597, Zfp661, Zfp760, Zfp534, Gm14322, Zfp449, Gm14326, A9…
2	Immune system process	8.50743	Zbtb1, Oas3, Polr3k, Ifitm3, Irf7, Cd300e, Adar, Fcgr4, Iigp1, Ripk2, Herc6, Nr1h4, Zbp1, Rsad2, Ifit2, Lgals9, Sirpb1a, Tlr7, Nlrp10, Parp9, Spon2, Parp14, Klrk1, Pml, Rnf213, Mysm1, Ifit1, Slfn8, Oasl1, Oas2, Oasl2, Eif2ak2, Hc, Ifih1, Bst2, Irf9, Cd55, Irgm1, Polr3f, Mefv, Alcam, Mfhas1, Cd5l, Ifit3, Ifi204, Dhx58, Neurl3
3	Metal-binding	5.25528	Stk26, Cyp11a1, Cpne4, Rpap2, Zfp811, Fbxo43, Zfp503, Agtpbp1, Gm2007, Zfp994, 9130019O22Rik, Cmah, Bhmt, Zfp267, Mblac2, Zfp974, Efcab3, Dmrtb1, Zdbf2, Smad5, Zfp971, Zzz3, Smpd3, Oas3, Rabif, Pdss1, Zbtb43, Dgke, Gm11007, Obscn, Zfp53, Trim30a, Phf11b, Gm14391, Mmp13, Klf9, St18, Bspry, Zfp329, Ifih1, Ebf1, Zfp747, Ube3a, Zfp942, Usp51, Zfhx3, Rnf222, Zfp292, Dhx58, Hnf4a, Fcer2a, Gm14434, Zfp7…
4	Positive regulation of interferon-beta production	3.5868	Oas3, Tlr7, Oas1g, Isg15, Oas2, Ifih1, Oas1a, Zbtb20, Irf7, Oas1b, Dhx58, Polr3f
5	Negative regulation of viral genome replication	3.13114	Ifi207, Ifi206, Oas3, Oasl1, Ifitm3, Oas2, Oasl2, Eif2ak2, Mx2, Ifih1, Bst2, Oas1b, Rsad2, Ccl5, Oas1g, Isg15, Oas1a, Ifi204
6	Cellular response to interferon-beta	2.93126	Ifi207, Ifit1, Ifi206, Ifi213, Igtp, Iigp1, Oas1b, Irgm1, Ifi211, Ifi202b, Irgm2, Ifi214, Oas1g, Oas1a, Tgtp1, Ifi203, Ifit3, Iigp1c, Ifi204
7	Pleckstrin homology-like domain	2.35147	Frmpd1, Exoc8, Anks1b, Arhgef6, Ralgps2, Gulp1, Apbb2, Appl2, Plekha8, Plekha7, Pdzph1, Arhgap12, Rabgap1l, Dab1, Eps8l2, Appl1, Mtmr6, Rasal2, Rasa1, Arhgef19, Obscn, Ptpn3, Arhgef26
8	Purine-rich negative regulatory element binding	2.15536	Pura, Purg, Purb
9	Tudor domain	2.05235	Phf20l1, Tdrd7, Alg13, Rnf17, Akap1, Tdrkh, Arid4a
10	PDZ domain	1.83706	Lin7c, Frmpd1, Patj, Cask, Rhpn1, Dlg2, Pdzph1, Magi3, Card14, Rims2, Ppp1r9a, Ptpn3, Pdzd9, Pdzrn3
11	Src homology-3 domain	1.64317	Dock3, Nck1, Cask, Baiap2l1, Arhgef6, Dlg2, Pex13, Srgap1, Arhgap12, Srms, Eps8l2, Rasa1, Arhgef19, Obscn, Arhgef37, Ptk6, Sh3tc1, Arhgef26
12	C2H2-type 1	1.61236	Klf9, Zfp661, Zfp12, Zfp518a, Klf8, Zfp329, Zfp618, A930039A15Rik, Zbtb6, Zfp770, Zfp82, Rbak, Dnajc21, Zfp668, Rnf138, Zfp369, Zbtb20, Zfp14, Zfp60, Zfhx3, Zfp654, Prdm9, Zfp292
13	Cilium	1.59895	Prom2, Bbof1, Slc9c1, Cep41, Rapgef4, Ccdc39, Bbs4, Esr2, Ajm1, Odad1, Armc9, Kif3a, Bbs12, Adgb, Gpr83, Fam149b, Hyls1, Catsper2, Septin10, Pde1c, Dync2li1, Ccdc65, Enkur, Ift25, Wdpcp, Tbc1d30, Pde4c, Bbs7
14	Regulation of transcription, DNA-templated	1.56725	Taf6l, Mterf1a, Gm2026, Gm14399, Phf20l1, Rnf20, Zfp369, Gm2007, Ehf, Fzd7, Nfat5, Gm14288, Zfp14, Zfp719, Zfp866, Vax2, Gm14410, Zfp12, Zfp456, Ppie, Irf9, Dmrtb1, Smad5, Zfp82, Pias2, Rbak, Zfp1001, Zzz3, Satb1, Kmt2c, Zfp60, Prdm9, Zfp661, Ppargc1b, Gm14326, Irf7, Prrx1, Esr2, Nr1h4, Hey1, Maff, Foxo1, Setd7, 3300002I08Rik, Gm14440, Pou5f2, Pml, Klf9, St18, Sox4, Mterf1b, Mterf1b, Apbb2, Esrrg…
15	Ly-6 antigen / uPA receptor -like	1.54057	Ly6c1, Ly6c2, Ly6i, Gml, Ly6a
16	Ubl conjugation pathway	1.43847	Gm5434, Fbxo43, Ube2l6, Cul4b, Rc3h2, Alg13, Klhl7, Ccnb1ip1, Socs4, Herc6, Usp33, Mindy2, Rnft1, Rnf20, Isg15, Klhl13, Usp18, Pdzrn3, Rnf213, Mysm1, Klhl24, Znrf2, Fbxo11, Klhdc1, Cul5, Rnf169, Commd6, Mid2, Ube3a, Pias2, Peli1, Fbxo32, Rnf138, Nhlrc1, Usp51, Rbbp6, Neurl3
17	Immunoglobulin-like domain	1.42145	Unc5c, Clmp, H2-T22, Trbv1, Trbv3, Islr2, Mybpc1, Ntrk3, L1cam, Fcgr4, Ighv14-2, Ighv1-63, Cadm2, Sirpb1a, Trav6d-4, Trav12n-2, Obscn, Trav6-7-dv9, Cd101, Lilra6, Sema3b, Lrig1, Trgv5, Myom3, Trav13-2, Il18r1, Scn2b, Mdga2, Hc, Nphs1, Flt1, Siglec1, Unc5b, Ncr1, Trav12d-2, BC053393, Lrit1, Il6ra, Alcam, Igsf3, Trav13-4-dv7, Igha, H2-M2, Mybpc2, Mpz, H2-T24, Ighv6-5, Adgra3
18	L27	1.37854	Lin7c, Patj, Cask, Dlg2
19	Pathways of neurodegeneration - multiple diseases	1.37677	Kras, Wnt4, Kif5b, Uba7, Cacna1d, Ube2l6, Fzd9, mt-Co3, Nras, mt-Atp8, mt-Nd2, mt-Nd5, Braf, Camk2g, mt-Co1, Il6, mt-Cytb, Trpc3, mt-Nd3, Psma3, mt-Nd1, mt-Nd4, Fzd7, Mapk11
20	Cellular response to virus	1.34775	Irgm2, Cxcl10, Il6, Tlr7, Igtp, Adar, Mapk11, Mmp12, Irgm1, Lgals9
21	Lipid transport	1.31915	Apol11b, Apol9b, Apol9a, Apol11a, Atg9b, Gulp1, Apol10a, Abcd3, Atp8b5, Slc27a6, Plekha8, Slc25a20
22	Negative regulation of tumor necrosis factor production	1.27136	Ghrl, Sirt1, Trim30a, Nr1h4
23	K Homology domain	1.22609	Mex3a, Akap1, Mex3b, Tdrkh, Ddx43, Nova1
24	Steroid hormone receptor	1.09511	Esrrg, Nrsc1, Esr2, Hnf4a, Nr2c1, Nrih4
25	Positive regulation of NF-kappaB transcription factor activity	1.07993	Eda, Kras, Trim30d, Eif2ak2, Mid2, Ripk2, Tnfsf11, Rhebl1, Trim15, Card14, Nts, Trim30a, Il18r1, Trim30c
26	Armadillo-type fold	1.00159	Taf6l, Dock3, Pkp4, Stk36, Pik3ca, Armc12, Ppp4r1, Kifap3, Pdcd4, Agtpbp1, Rsph14, Mei1, Armc9, Ranbp6, Armcx5, Fry, Armcx2
27	Na-Ca exchanger/integrin-beta4	0.959536	Itgb4, Adgrv1, Fras1
28	SH2 domain	0.957906	Nck1, Rasa1, Sh2d4a, Clnk, Ptk6, Socs4, Hsh2d, Sh2d4b, Srms
29	Differentiation	0.949453	Eda, Mrtfb, Zbtb1, Tdrd7, Slc9c1, Ntrk3, Spast, L1cam, Armc12, Sirt1, Tdrkh, Arid4a, Foxo1, Boll, Hfm1, Obscn, Adgb, Spata25, Sema3b, Klrk1, Vegfc, Kdm3a, Tenm3, Catsper2, Hook1, Pld6, Rnf17, Flt1, Smad5, Golga3, Epha2, Tnfsf11, Strbp, Ift25, Camk2g, Dab1, Egfl6, Tnfrsf12a, Rims2, Syt1, Slfn5
30	GTP binding	0.875543	Kras, Rab27a, Rab39, Igtp, Septin10, Mx2, Nras, Iigp1, Arl10, Rab14, Gm43302, Irgm1, Gvin1, Mx1, Gimap8, Rhebl1, Gtpbp8, Mfhas1, Mtif2, Tgtp1, Arl5b, Iigp1c, Gvin2
31	WW domain	0.866976	Magi3, Yap1, Apbb2, Plekha7, Arhgap12
32	Guanylate kinase	0.84984	Cask, Magi3, Card14, Dlg2
33	Double-stranded RNA-binding-like domain	0.848601	Strbp, Eif2ak2, Adar
34	Golgi apparatus	0.848367	Stk26, Rab27a, Acsl3, Mal, Mamld1, Nras, Iigp1, Kcnc4, Plekha8, Slc35e2, Usp33, Gkap1, St6gal1, B3gnt5, Rabgap1l, Ehf, Tgtp1, Itm2a, Fut11, Fam174b, Slc26a11, Pld6, Bst2, Avpr1b, Rab14, Irgm1, Ftcd, Tmem30c, Golga3, Dusp10, Smpd3, H2-M2, Xylt1, Gnpnat1, Syt1, Rab39, H2-T22, St8sia1, Ptgds, Chac1, Yipf5, Kifap3, Prepl, Rsad2, Mob4, Camkmt, Emp2, Ap1m2, Galnt4, Tmem87b, Galnt9, Mmp13, Wnt4, Angptl3…
35	Peroxisome	0.84335	Acsl4, Acsl3, Acot6, Pex16, Acbd5, Myo5a, Pex13, Abcd3, Akap11
36	Flagellum	0.815417	Rsph14, Catsper2, Slc9cl, Septin10, Bbs4, Adgb, Ccdc65, Enkur
37	Guanyl-nucleotide exchange factor activity	0.770586	Dennd6a, Dock3, Arhgef6, Ralgps2, Rapgef4, Rabif, Kndc1, Eps8l2, Dennd11, Arhgef19, Obscn, Arhgef37, Lekr1, Dennd5b, Arhgef26
38	Positive regulation of interferon-gamma production	0.756483	Klre1, Tlr7, Isg15, Nras, Ripk2, Il18r1, Klrk1,
39	Isopeptide bond	0.751889	Kras, Zbtb1, Zfp518a, Kansl1l, Nras, Tdrkh, Zmynd11, Arid4a, Phf20l1, Zfp668, Zfp369, Fyttd1, Nfat5, Taf1, Rnf213, Mysm1, Hnrnph1, Zfp12, Nkap, Esco1, Rnf169, Cul5, Caap1, Add3, Zfp82, Irgm1, Pias2, Rbak, Zzz3, H4c12, Satb1, Rbbp6, Epc2, Ppfibp1, Ubn2, Zfp318, Sprtn, Mrtfb, Cul4b, Ifitm3, Irf7, Adar, Thoc1, Braf, Zfp770, Ripk2, Zmym5, Nr1h4, Zbtb43, Zbp1, Rsad2, Kmt5b, Isg15, Zbtb20, Pml, Kif5b, …
40	Transferase activity	0.747725	Stk26, Hykk, Parp12, Rc3h2, Alg13, Sirt1, Herc6, St6gal1, B3gnt5, Srms, Mettl18, Rnf20, Fut11, Taf1, Pdzrn3, Parp14, Rnf213, Map4k4, Znrf2, Clk1, Esco1, Rnf169, Mid2, Tesk1, Ddr2, Ippk, Peli1, Pias2, Ftcd, Epha2, Camk2g, Poln, Kmt2c, Rbbp6, Map3k4, Xylt1, Prdm9, Cdkl4, Gnpnat1, Oas3, Cask, Lrat, Stk36, St8sia1, Ube2l6, Ntrk3, Map4k3, Pdss1, Ccnb1ip1, Epha1, Braf, Ripk2, Dgke, Ptges, Rnft1, Camkmt…
41	BTB/POZ-like	0.735052	Klhl24, Zbtb1, Ivns1abp, Lgals3bp, Klhl7, Kcnc4, A930039A15Rik, Zbtb6, Kcna4, Zbtb43, Kctd12, Bach2, Zbtb10, Zbtb20, Klhl13
42	Sterile alpha motif/pointed domain	0.733831	Eps8l2, Anks1b, Ehf, Ppp1r9a, Samd3, Epha1, Ppfibp1, Samd15, Epha2
43	Cell differentiation	0.732362	Eda, Zbtb1, Tdrd7, Slc9c1, Spast, Armc12, Sirt1, L1cam, Tdrkh, Arid4a, Srms, Hfm1, Ehf, Adgb, Spata25, Klrk1, Kdm3a, Catsper2, Hook1, Pld6, Smad5, Golga3, Epha2, Strbp, Camk2g, Syt1, Slfn5, Mrtfb, Ntrk3, Braf, Nr1h4, Pura, Foxo1, Boll, Obscn, Sema3b, Wnt4, Vegfc, Tenm3, Sox4, Rnf17, Flt1, Purb, Nr2c1, Tnfsf11, Ift25, Fst, Dab1, Egfl6, Tnfrsf12a, Rims2, Ptk6, Hnf4a
44	Nucleotidyltransferase activity	0.717323	Poln, Oas3, Parp12, Oasl1, Oasl2, Oas2, Parp9, Parp14
45	GPCR, family 2-like	0.706646	Fzd9, Fzd7, Adgrg6, Vipr1, Adgrv1, Adgra3, Adgrd1
46	cDENN	0.704936	Dennd6a, Dennd11, Dennd5b
47	Cilium assembly	0.673068	Parva, Stk36, Cep41, Bbs4, Dync2li1, Ccdc65, Ift25, Armc9, Ttbk2, Wdpcp, Kif3a, Fam149b, Bbs7, Hyls1
48	PDZ 1	0.671758	Patj, Magi3, Dlg2, Pdzrn3
49	Methyltransferase activity	0.665752	Mettl18, Kdm3a, Camkmt, Sted7, Kmt5b, 2700097O09Rik, Kmt2c, Prdm9, Mgmt, Bhmt
50	Carbohydrate binding	0.636657	Fcer2a, Clec4g, Cd209d, Klre1, Siglec1, Clec1a, Klri2, Lgals9, Klra7, Galnt4, Gbe1, Galnt9, Krlk1
51	EGFR tyrosine kinase inhibitor resistance	0.635701	Kras, Il6, Il6ra, Pdgfa, Nras, Pik3ca, Braf
52	Sodium ion transport	0.633055	Slc4a10, Slc10a5, Slc9c1, Scnn1g, Atp1b1, Slc38a2, Slc38a4, Scn2b, Fgf13
53	AMPK signaling pathway	0.626074	Prkag3, Foxo1, Pfkfb4, Ppp2r3a, Fbp1, Pik3ca, Sirt1, Rab14, Hnf4a
54	Endosome	0.62362	Rab27a, Lrat, Ms4a2, Ifitm3, Tmem106b, Snx30, Spast, Slc30a4, L1cam, Appl2, Rabgap1l, fRnt1, Rep15, Appl1, Tlr7, Fzd7, Pml, Dennd6a, Znrf2, Slc39a14, Bet1l, Apbb2, Flt1, Bst2, Tbc1d12, Rab14, Irgm1, Dio3, Abhd17b, Zfyve16, Vps25, Gnpnat1
55	Frizzled domain	0.604794	Corin, Fzd9, Fzd7
56	Killing of cells of other organism	0.602406	Irgm2, Cxcl10, Nts, Hc, Gzma, Gzmb
57	Ion transport	0.586384	Slc9c1, Cacna1d, Tmem38b, Slc30a4, Kcnc4, mt-Atp8, Kcna4, Slc38a2, Slc38a4, Slc4a10, Trpc3, Slc31a2, Kcnma1, Scnn1g, Slco5a1, Kcnu1, Scn2b, Slc10a5, Slc12a8, Bspry, Catsper2, Slc39a14, Slc26a11, Atp1b1, Gabrr2, Cacna1i, Cldn15, Chrnb1, P2rx6, Cacna2d4, Chrnb4
58	SAP domain	0.585723	Mrtfb, Ccar1, Piasa
59	Kelch 1	0.566459	Klhl24, Ivns1abp, Klhdc1, Klhl7, Klhl13
60	Hormone activity	0.563083	Prl2c3, Spx, Ghrl, Insl3, Ucn2, Metrnl, Edn3
61	Cytoplasmic	0.562001	Unc5c, Corin, Prom2, Mal, Islr2, Fcgr4, Kcnc4, Izumo1, St6gal1, Prrt2, Scnn1g, Adgrg6, Gpm6a, Lrig1, Fut11, Stra6, Slc25a20, Klrk1, Pgap1, Fam174b, Catsper2, Shisa7, Slc26a11, Bst2, Ddr2, Avpr1b, Clec1a, Adgrd1, Tmem30c, Marveld3, Epha2, Sdc3, Alcam, P2rx6, Smpd3, Dipk1a, Xylt1, Gpr33, Adgrv1, Clmp, Rtp4, Ntrk3, Sptssa, Yipf5, Rxfp4, Pex13, Cd300e, Slc38a2, Ier3, Slc38a4, Flvcr1, Ptges, Galnt4, F…
62	Positive regulation of T cell migration	0.551873	Cxcl10, Ccl5, Lgals9
63	Cushing syndrome	0.534211	Cyp11a1, Wnt4, Camk2g, Cacna1i, Cacna1d, Fzd9, Fzd7, Braf, Kcna4, Mrap
64	Calmodulin-binding	0.532257	Camk2g, Cask, Pcp4, Smtnl1, Obscn, Esrrg, Myo5a, Add3, Pde1c, Enkur, Syt1
65	Pleckstrin homology-like domain	0.531285	Frmpd1, Exoc8, Anks1b, Arhgef6, Ralgps2, Gulp1, Apbb2, Appl2, Plekha8, Plekha7, Pdzph1, Arhgap12, Rabgap1l, Dab1, Eps8l2, Appl1, Mtmr6, Rasal2, Rasa1, Arhgef19, Obscn, Ptpn3, Arhgef26
66	Positive regulation of tyrosine phosphorylation of STAT protein	0.527152	Il6, Il6ra, Ccl5, Parp9, Parp14
67	Cardiac muscle contraction	0.513023	mt-Co1, mt-Cytb, Cacna1d, Cancna2d4, mt-Co3, Atp1b1, Tnni3
68	Positive regulation of smooth muscle cell proliferation	0.509948	Il6, Il6ra, Smpd3, Ccl5, Pik3ca, Flt1
69	Activation of GTPase activity	0.505782	Tbc1d25, Rasa1, Arhgef19, Ntrk3, Tbc1d30, Tbcd12, Epha1
70	Calcium ion transport	0.504105	Camk2g, Trpc3, Cacna1i, Bspry, Catsper2, Cacna1d, Ccl5, Cacna2d4
71	RNA recognition motif domain	0.494773	Hnrnph1, Msi1, Boll, Ppargc1b, Rbms3, Rnpc3, Ppie, Synj2, Rbm39, Enox1, Rbms1, Cstf2t
72	Fibronectin, type III	0.492548	Mdga2, Mybpc1, Mid2, Nphs1, L1cam, Epha1, Epha2, Lrit1, Il6ra, Itgb4, Mybpc2, Obscn, Myom3
73	Transcription regulator SCAN	0.488958	Zfp369, Zfp449, Zfp397, Zscan18
74	Arachidonate-CoA ligase activity	0.487568	Acsl4, Acsl3, Slc27a6
75	Metalloendopeptidase activity	0.483626	Adam6b, Gm4787, Mmp27, Adam23, Mmp12, Sprtn, Mmp13,
76	Cellular response to interleukin-1	0.463788	Il6, Ccl5, Mapk11
77	Small GTPase mediated signal transduction	0.442082	Rhebl1, Dock3, Dab1, Rapgef4, Ralgps2, Rabif, Kndc1
78	Hypertrophic cardiomyopathy	0.40721	Prkag3, Il6, Cacna1d, Itgb4, Cacna2d4, Tnni3
79	Plasma membrane	0.395443	Unc5c, Kras, Cpne4, Acp3, Klhl7, Bbs4, Izumo1, Kcnc4, Arid4a, Snap91, Itm2a, Lrig1, Stra6, Klrk1, Hyls1, Pxk, Fam174b, Gng7, Mblac2, Bst2, Avpr1b, Ddr2, Tmem30c, Ftcd, Alcam, Abhd17b, P2rx6, Smpd3, Rasa1, Adgrv1, Bbs7, Ly6a, Gpr33, Aph1c, Oas3, Ntrk3, Cd300e, Flvcr1, Emp2, Obscn, Ptpn3, Kcnu1, Klf9, Tenm3, Slc16a6, Mal2, Gabrr2, Gpr160, Wdpcp, Ptk6, Mpz, Eda, Fcer2a, Acsl4, Slc9c1, Mlkl, Trbv3, L…
80	Speract/scavenger receptor	0.395105	Corin, Lgals3bp, Cd5l
81	Wnt signaling pathway	0.386504	Vax2, Wnt4, Rnf138, Fzd9, Dixcd1, Fzd7, Shisa6, Draxin
82	JmjC domain	0.382139	Kdm3a, Kdm4d, Hspbap1
83	Helical; Anchor for type IV membrane protein	0.379333	Bet1l, Vamp4, Oas1b, Vamp1, Mospd2
84	Cell junction	0.377421	Lin7c, Klhl24, Clmp, Patj, Dsg3, Parva, Pkp4, Dixdc1, Yap1, Dsc2, Ajm1, Plekha7, Marveld3, Espn, Ctnna3, Epha2, Cldn15, Magi3, Itgb4, Cldn7
85	Death domain	0.372876	Unc5c, Thoc1, Unc5b
86	Lysosome	0.35713	Rab27a, Rab39, Dnase2b, Kif5b, Sgsh, Znrf2, Slc39a14, Acp3, Vma21, Ifitm3, Tmem106b, Slc26a11, Akr1b7, Slc30a4, Pde1c, Rab14, Irgm1, Tlr7, Spag9, Myo5a, Gzmb, Mpz, Mmp13
87	GDP binding	0.333104	Rab27a, Kras, Rhebl1, Nras, Iigp1, Rab14
88	Fatty acid biosynthetic process	0.326682	Ptges, Prkag3, Acsl3, Abcd3, Lpl, Ptgds
89	Serine-type endopeptidase activity	0.325048	Prss57, F7, Corin, Klk1b27, Gzma, Prss39, Cd5l, Gzmb, Prepl, Prss29, Mmp13
90	Exocytosis	0.320905	Rab27a, Lin7c, Exoc8,
91	Calponin-homology (CH)	0.319896	Arhgef6, Parva, Smtnl1, Dixdc1, Hook1
92	von Willebrand factor, type A	0.303055	Cpne4, Ints6l, Ints6, Cacna2d4, Itgae
93	Tetratricopeptide repeat	0.287732	Emc2, Ttc19, Ifit1, Bbs4, Ifit3, Ifit3b, Sh3tc1, Ifit2
94	Ribonuclease H-like domain	0.286982	Zfp618, Isg20l2, Cnot7, Exd1
95	G1 motif	0.284823	Septin10, Mx2, Mx1
96	Bromodomain	0.282211	Brws1, Taf1, Zmynd11
97	Peptidyl-prolyl cis-trans isomerase activity	0.28127	Ppie, Fkbp3, Pin4
98	Mitochondrial outer membrane	0.279812	Acsl4, Acsl3, Ntrk3, Akap1, Pld6, Armc12, Armcx2, Rsad2
99	Regulation of membrane potential	0.273756	Kif5b, Cacna1i, Chrnb1, Kcnma1, Rims2, Chrnb4, Gabrr2
100	Single-stranded RNA binding	0.25895	Strbp, Msi1, Tlr7, Ifih1, Dhx58, Ddx60, Cbx8
101	Lipocalin/cytosolic fatty-acid binding protein domain	0.255303	Mup3, Lcn4, Ptgds, Rbp4
102	Phosphatidylinositol binding	0.247812	Pxk, Exoc8, Appl1, Snx30, Appl2, Snx29
103	Positive regulation of natural killer cell mediated cytotoxicity	0.227113	H2-T22, Klre1, H2-M2, Klrk1, Klri2
104	Mitochondrial substrate/solute carrier	0.22414	Slc25a20, Ucp3, Slc25a43
105	Antigen processing and presentation of endogenous peptide antigen via MHC class Ib	0.223035	H2-T22, H2-M2, H2-T24
106	Flavin adenine dinucleotide binding	0.218027	Mto1, Ivd, Dus4l, Gulo, Gfer
107	Metalloendopeptidase activity	0.216237	Adam6b, Gm4787, Mmp27, Adam23, Mmp12, Sprtn, Mmp13,
108	Zinc finger, FYVE/PHD-type	0.213073	Phf20l1, Rims2, Kmt2c, Phf11d, Zfyve16, Zmynd11, Mllt6
109	Leucine-rich repeat, typical subtype	0.210513	Lrit1, Lrrc63, Mfhas1, TLR7, Islr2, Xrra1, Lrig1, Adgra3, Lrrc23
110	Thiol-dependent ubiquitin-specific protease activity	0.207332	Mysm1, Usp51, Alg13, Usp18, Usp33, Mindy2
111	Endonuclease	0.181385	Dnase2b, Slfn8, Nthl1, Pld6
112	Cellular response to DNA damage stimulus	0.158774	Uba7, Zbtb1, Nthl1, Cul4b, Rnf169, Yap1, Sirt1, Alkbh7, Ier3, Mlh3, Foxo1, Poln, Rnf138, Kdm4d, Usp51, Mcmdc2, Setd7, Nfat5, Parp9, Rbbp6, Epc2, Sprtn, Mgmt
113	Motor proteins	0.157666	Kif5b, Bicdl2, Kif3a, Myo5a, Myh15, Dync2li1, Kifap3, Tnni3
114	Dephosphorylation	0.156975	Dusp10, Pxylp1, Mtmr6, Acp3, Fbp1, Ptpn3
115	Phosphoprotein phosphatase activity	0.153216	Dusp10, Rpap2, Pptc7, Ptpn3, Ppp1r3e, Ppm1n
116	Homophilic cell adhesion via plasma membrane adhesion molecules	0.141674	Pcdhb16, Tenm3, Pcdhb22, Dsg3, Pcdh1, L1cam, Cadm2, Dsc2
117	Iron-sulfur cluster binding	0.139833	Glrx2, Nthl1, Cmah, Rasd2
118	Basic-leucine zipper domain	0.136928	Fosl1, Bach2, Maff
119	Rhythmic process	0.119518	Klf9, Sirt1, Enox1, Ube3a, Hnf4a, Pml
120	Epidermal growth factor-like domain	0.111748	F7, Adam6b, Gm4787, Tenm3, Egfl6, Itgb4, Lama3, Gm13033, Adam23, Fras1
121	Mitochondrial matrix	0.109106	Tdrd7, Sdhaf4, Ivd, Glrx2, Mterf1b, Mterf1a, Pptc7, Alkbh7, Pin4, Ndufaf1
122	C2 calcium-dependent membrane targeting	0.103502	Cpne4, Rasal2, Rasa1, Rims2, Syt1
123	mRNA export from nucleus	0.0822695	Fyttd1, Thoc2, Thoc1
124	Transmembrane transporter activity	0.0798922	Slc4a10, Sfxn5, Flvcr1, Sfxn4, Slc16a6, Slc16a8
125	Steroid biosynthetic process	0.0692661	Cyp11a1, Cyb5r2, Sc5d
126	Extracellular region	0.061837	Eda, Dnase2b, Prl2c3, Corin, Acp3, Npff, Akr1b7, Gzma, Prss39, Lama3, Crisp3, Mmp12, St6gal1, Spon2, Insl3, Cxcl10, Spock3, Lgals3bp, Ly6g5b, Hc, Acrbp, Siglec1, Ucn2, Artn, Edn3, Apol9b, Tectb, Il6, Lcn4, Smpd3, Gzmb, Sfn, Adgrv1, Stk36, Ovgp1, Ptgds, Ccdc39, Lgals9, Prss57, Mup3, Pdgfa, Spx, Obscn, Isg15, Ghrl, Lpl, Sema3b, Fgf13, Mmp13, Wnt4, Vegfc, F7, Angptl3, Olfml2a, Rbp4, Enox1, Draxin, A…
127	Immunoglobulin mediated immune response	0.0222925	Igha, Irf7, Ighv1-63, Ighv14-2, Ighv6-5
128	G-protein coupled receptor signaling pathway	0.0222723	Or2y1g, Rxfp4, Fpr1, Fzd7, Ghrl, Adgrg6, Vipr1, Gpr83, Cxcl10, Gng7, Fzd9, Avpr1b, Adgrd1, Gpr27, Or52i2, Or10aa3, Ccl5, S1pr5, Gpr160, Adgrv1, Mrgpra4, Adora2b, Gpr33, Or2m12, Adgra3, Gpr174
129	REPEAT:1	0.0219145	Vegfc, Ovgp1, Ifi204, Ifi211
130	mRNA processing	0.0155632	Hnrnph1, Ppie, Gemin2, Rbbp6, Adar, Thoc2, Rbm39, Thoc1, Nova1, Cstf2t, Ramac
131	Ankyrin repeat	0.0124829	Trpc3, ANkrd34a, Anks1b, Ankrd23, Nrarp, Espn
132	Myc-type, basic helix-loop-helix (bHLH) domain	0.0116113	Olig3, Usf3, Hey1
133	EF-Hand 1, calcium-binding site	0.0103977	Gpd2, Pp2r3a, Efcab3, Capsl, S100a16
134	Homeobox	0.00431467	Vax2, Satb1, Zfhx3, Prrx1, Pousf2
135	WD40/YVTN repeat-like-containing domain	0.00160424	Wdr20, Wdpcp, Brwd1, Spag9, Sema3b, Fbxw13, Wdr73
136	Cell cycle	0.000669007	Stox1, Cul4b, Esco1, Mplkip, Septin10, Spast, Ccar1, Appl2, Appl1, Bex2, Smpd3, Txlng, Klhl13, Cdkn1c, Taf1
137	Sensory perception of smell	1.4766e-09	Or2y1g, Or52i2, Or10aa3, Bbs4, Pde1c, Or2m12

## Sheet: Table S2B
Table S2B. DAVID functional clustering of DEGs (P < 0.05) in the spleens of TMEV-infected mice on day 7 p.i.
Cluster	Pathway	Enrichment Score	Genes
1	Immune system process	18.1504	Hck, Sema4a, Card11, Irag2, Dhx36, Iigp1, Ticam2, Herc6, Acod1, Slfn2, Tlr3, Themis2, Casp4, Klrk1, Malt1, Rnf213, Ifit1, Atm, B2m, Oasl1, C2, Bst2, Zc3hav1, Ly86, Rigi, Ly9, Sp110, Otulin, Znfx1, Tap1, Psmb9, Adgrb1, Oas3, Ifi35, Tasl, Unc93b1, Dtx3l, Ripk2, Zbp1, Trim25, Themis, Lgals9, Usp27x, Nmi, Samhd1, Otub1, Cd86, Zdhhc18, Parp9, Trim14, Pml, Marchf1, Nod2, Rnf19b, Eif2ak2, Ifih1, H2-K1, …
2	Cytosolic ribosome	15.0651	Rpl36, Rpl5, Rpl9-ps6, Rpl9-ps6, Rpl9, Rpl34-ps1, Rpl34-ps1, Rpl19, Rps3, Rpl12, Rpl13a, Rpl15, Rpl4, Rpl13-ps6, Rpl13-ps6, Rpl10a, Rplp1, Rps5, Rps6, Rpl13, Rpl37rt, Rpl27, Rpl11, Rps6-ps4, Ascc2, Rpl22, Rpsa, Rps16, Uba52rt, Rps10, Ascc3, Rpl31, Rpl32, Rps9, Rpl38, Rpl26, Rpl6, Rpl7, Rpl35, Rps17, Rpl18, Apod, Rpl6l, Rps11, Rpl23a, Rnf25, Rps15a, Rps20, Rpl36al, Rps19, Rps15, Rpl34, Rpl18a, Rpl…
3	Ubl conjugation	13.448	Nufip2, Palmd, Rbbp7, Nol8, Ino80d, Zhx1, Crtc2, Fyttd1, Mybl1, Pias4, Zfp263, Rbm4, Rnf213, Prdx1, Rpl4, Mtf2, Arl14ep, Bclaf1, Npm1, Nkap, Sf3b1, Rpl13, Caap1, Bcl11a, Casz1, Baz2a, Rbm26, Phf6, Rbbp5, Zfp62, Zfp787, Rsbn1, Rbbp6, Srsf6, Atrx, Resf1, Zfp638, Bhlhe41, Zfp280d, Etv3, Ddx10, Rpl26, Trmt1l, Sumo1, Safb2, Srebf2, Igf2bp3, Zfp770, Rpap3, Usp16, Ube2i, Samhd1, Zfp131, Tra2a, Nfrkb, Su…
4	Zinc-finger	7.82068	Zfp248, Adap1, Tax1bp1, Rock2, Zfp36, Trim43a, Zfp433, Zfp263, Trim34b, Rbm4, Rlim, Zfp408, Mtf2, Rgs3, Rassf5, Rbm27, Fgd2, Bcl11a, Rpl37rt, Mbnl1, Zfp655, Zc3hav1, Casz1, Baz2a, Polk, Zc3h12d, Tank, Znfx1, Atrx, Lnx2, Zfp638, Zranb2, Tut4, Zfp280d, Zc3h15, Trmt1l, Zfhx2, Zfp593, E430018J23Rik, Trim25, Polh, Zfp820, Syvn1, Trim14, Rere, Trim30a, Phf11b, Marchf1, Aebp2, Kdm4c, Sp4, Ube3a, Zfand4,…
5	Defense response	7.37404	Lsp1, Stat1, Iigp1, Gm12185, Acod1, Tnf, Cybb, Tapbp, Tlr3, Tgtp1, Ifi47, Tgtp2, Iigp1c, Nox1, Cxcl10, Nod2, Igtp, Stat3, Gm4841, Gm5431, Irgm1, Irgm2, Stat2, 9930111J21Rik2, 9930111J21Rik1, F830016B08Rik, Nod1, Tap1
6	Cellular response to DNA damage stimulus	6.25718	Zbtb1, Fancm, Tex15, Parp10, Ercc6l2, Hmces, Ino80d, Taok1, Ppp4r3b, Mms19, Clock, Setx, Rad1, Smc5, Dclre1c, Atr, Rif1, Rps3, Abraxas1, Nae1, Batf, Gtf2h5, Blk, Msh3, Atm, Uba7, Trp73, Chd2, Fam111a, Sfr1, Smchd1, Bclaf1, Fancg, Xiap, Aptx, Pold4, Zc3h12a, Alkbh3, Ascc2, Polk, Rbbp5, Tank, Rbbp6, Prkcd, Epc2, Ascc3, Atrx, Egln3, Rassf1, Brip1, Cul4b, Nipbl, Dtx3l, Usp16, Morf4l1, Rev3l, Polh, Po…
7	Activation of innate immune response	5.99522	Ifi207, Pqbp1, Ifi213, Ifi208, Gbp3, Zbp1, Ifi214, Gbp2b, Mndal, Trim12a, Ifi203, Matr3, Trim30a, Pycard, Ifi206, Trim30d, Ifi211, Ifi202b, Tbk1, Gbp7, Trim30b, Ifi209, Znfx1, Aim2, Tlr4, Ifi204, Ifi205, Trim30c
8	Zinc finger C2H2-type/integrase DNA-binding domain	5.9647	Zbtb32, Zfp248, Zhx1, Zfp882, Zfp160, Zfp825, Zfp26, Zfp644, Nufip1, Zfp513, Zfp251, Zfp994, Zfp433, Zfp263, Zfp189, Mynn, Zfp408, Zfp981, Zfp930, Bcl11a, AI987944, Zfp655, Klf12, Casz1, Zfp62, Zfp787, Zfp638, Zfp280d, Zfp986, Zfp933, Zfp931, Zfp85, Trmt1l, D130040H23Rik, Zfhx2, Rnf114, Zfp945, Zfp593, Zfp770, E430018J23Rik, Gm21411, Zfp820, Zfp131, Zfp1007, Zfp1007, 4930522L14Rik, Zfp120, Zscan2…
9	RING-type	5.35466	Rc3h2, Mdm2, Rnf114, Rnf227, Cul9, Dtx3l, Bfar, Trim25, Rnf166, Trim12a, Syvn1, Rnf126, Trim21, Rnf31, Trim30a, Trim34b, Topors, Rnf121, Marchf1, Pml, Nfxl1, Rnf213, Rnf115, Pdzrn4, Mycbp2, Rnf170, Rnf25, Rnf19b, Trim34a, Trim30d, Dtx1, Rbck1, Trim26, Rnf157, Trim68, Ankib1, Pcgf1, Trim30b, Rnf138, Traf5, Dtx2, Rbbp6, Siah2, Lnx2, Dzip3, Trim30c, Rnf146
10	Cytosolic small ribosomal subunit	5.18003	Rps9, Rps20, Rps26, Rps15a, Rps5, Rps6, Rps19, Gm15501, Rps15, Rps17, Larp4, Rps6-ps4, Eif2a, Fau, Rps11, Isg15, Rpsa, Rps16, Rps3, Rps29, Rps10, B3galt4
11	Antigen processing and presentation	4.9094	Klrc1, H2-T22, Klrd1, H2-Q7, Psme2, H2-T10, H2-T27, H2-T27, Tnf, Tapbp, Creb1, H2-Eb2, H2-D1, H2-Q2, B2m, Psme2b, H2-Q4, H2-K1, H2-Eb1, H2-Oa, Rfx5, Psme1, H2-T25, H2-Q6, Tap2, H2-Q10, H2-T23, H2-M3, Tap1, H2-T26, H2-T24, H2-Q1, H2-Q2, H2-T-ps
12	Influenza A	4.74151	Oas3, Irf7, Adar, Stat1, Chuk, Trim25, Tnf, H2-Eb2, Tlr7, Tlr3, Myd88, Map2k1, Oas1a, Fasl, Slc25a4, Pml, Pycard, Cxcl10, Xpo1, Oas2, Mx2, Eif2ak2, Ifih1, Pik3ca, Bid, Irf9, Oas1b, H2-Eb1, Casp1, H2-Oa, Tmprss2, Bax, Mx1, Tbk1, Rigi, Stat2, Ccl5, Oas1g, Nxt1, Tnfsf10, Tlr4, Prkcb
13	Helicase ATP-binding	3.79407	Fancm, Brip1, Ddx10, Ddx56, Dhx36, Ercc6l2, Dhx30, Ddx54, Chd7, Ddx59, Ddx19b, Ercc2, Tdrd9, Chd2, Tdrd12, Ddx24, Ifih1, Hells, Smarcad1, Dhx9, Ddx46, Ddx20, Rigi, Ddx52, Hltf, Atrx, Dhx58, Ythdc2, Ddx60
14	Endoplasmic reticulum	3.78415	Irag2, S100a10, Ero1b, Hmgcr, Nat8f7, Ptn, Peds1, Poglut1, Snx10, Cmah, Casp4, Tmem30a, Jkamp, Rpl13, Cyp39a1, Ccdc115, Lypla1, Suco, Cert1, Pcsk7, Tor1aip2, Tap1, Phtf2, Sptssa, Unc93b1, Tmed5, Scp2, Syvn1, Keap1, Insig1, Zdhhc18, Emid1, Rab9, Trappc2, Rab3gap1, Syncrip, Armc10, Marchf1, Ube2j1, Dtnbp1, Ormdl1, H2-Q4, H2-K1, Cers5, Mzb1, Atp10a, Scd2, Ctsw, Tpd52, Txndc5, Pigk, H2-T23, Dpp4, Pgs…
15	Golgi membrane	3.64159	Cope, Golga4, H2-Q7, Ap1g2, Hmgcr, Creb3, B3gnt5, Tapbp, Gbp2b, Gopc, Zdhhc2, Cog8, Hs3st2, Pi4kb, Coro7, Casd1, H2-Q2, St6galnac4, Tpst2, Gbp4, Fndc3a, B3gnt2, Abcb1b, Mr1, Chpt1, Irgm1, Atg9b, Chst14, Lyset, Lrrk2, Wscd1, Tmem87a, Pcsk7, H2-Q10, St8sia6, Slc30a5, Tapbpl, H2-M3, Arfip1, Tmf1, H2-T22, Zdhhc21, Srebf2, Pdcd10, Asah2, Manea, B4galnt1, Slc35a5, Slc35a3, Dnm1l, Man1a, Zdhhc18, Rab9, …
16	Positive regulation of interleukin-1 beta production	3.12857	Pycard, Ifi207, Nod2, Ifi206, Tmem106a, Stat3, Ripk2, Gsdmd, Casp1, Ifi211, Hspb1, Ifi202b, Tnf, Mndal, Myd88, Panx1, Aim2, Nod1, Tlr4, Casp4, Ifi204, Ifi205, Malt1
17	Lysosomal membrane	3.01493	Slc30a3, H2-Q7, Vps16, H2-Eb2, Hpse, Stx8, Fnip1, Lamtor4, H2-Q2, Bloc1s2, Pip4p1, Clcn7, B2m, Irgm1, H2-Oa, Lamtor5, Bri3, Chmp1a, H2-Q10, Anxa6, Vps13a, H2-M3, Stx7, H2-T22, Cdip1, Ifitm3, Tmem106b, Slc30a4, Ccz1, Dtx3l, H2-D1, Atraid, Cyb561a3, Marchf1, Cd1d1, Kif5b, Kxd1, Cd164, H2-Q4, Tmem192, H2-K1, H2-Eb1, Ostm1, Vti1b, H2-Q6, H2-T23, Ap1s3, Bloc1s1, H2-Q1, H2-Q2, Ap1s2, Depdc5
18	P-loop containing nucleoside triphosphate hydrolase	2.86333	Card11, Tor3a, Dhx36, Rala, Myo1f, Gpn1, Iigp1, Gnl2, Psmc6, Smc5, Pex1, Hs3st2, Afg1l, Iigp1c, Ddx19b, Msh3, Gvin2, Rnf213, Gbp4, Tdrd9, Chd2, Abcb1b, Tdrd12, Rab29, Gm5431, Gvin1, Gm43302, Rigi, Arl13b, Septin7, Znfx1, Tap1, Fign, Atrx, Ascc3, Slfn5, Brip1, Ddx10, Fbxo4, Rhot2, Nubp1, Rab9, Smc6, Rab30, Ntpcr, Ercc2, Helz2, Nod2, Cnp, Igtp, Rac2, Ddx24, Ifih1, Yme1l1, Nuggc, Pfkfb3, Rab1b, Mov1…
19	Schlafen AlbA-2	2.57525	Slfn8, Slfn2, Slfn9, Slfn4, Slfn1, Sfln5
20	Defense response to protozoan	2.34771	Bcl3, Gbp9, Gbp4, Igtp, Nkg7, Iigp1, Irf8, Gbp3, Gm43302, Irf4, Irgm2, Gbp2b, Gbp7, Myd88, Tgtp1, Batf, Tgtp2
21	Nucleic acid binding	2.0809	Ptbp3, Polr3k, Esrp2, Dhx36, Nol8, Dhx30, Ddx54, Ddx59, Msi2, Pnpt1, Dnajc21, Eef1akmt1, Rad1, Grsf1, U2surp, Rbm43, Rbm4, Zcchc2, Fxr1, Cpsf6, Hnrnpa2b1, Tdrd9, Rbm27, R3hcc1l, Npm1, Tdrd12, Jrkl, Ewsr1, Ddx46, Zcchc9, Rigi, Rbm7, Cmtr1, Rbm26, Trmt11, Cpeb2, Rbbp6, Srsf6, Ascc3, Zfp638, Zfp318, Ythdc2, Tut4, Piwil2, Polr1h, Rbmx, Brip1, Ddx10, Ddx56, Safb2, Zfhx2, Xrn2, Igf2bp3, Wbp4, Zfp593, R…
22	Regulation of transcription from RNA polymerase II promoter	2.07805	Zfp248, Med29, Zfp36, Zfp251, Hmgn3, Zfp994, Zfp433, Tox, Zfp263, Zfp189, Zfp408, Zfp981, Trp73, Chd2, Bcl11a, , Zfp655, Ccnh, Sp110, Sra1, Med13, Bhlhe41, Sos1, Zfhx2, Zfp945, Lrrfip1, E430018J23Rik, Zfp820, Elf1, Rfx7, Snip1, Lcorl, Aebp2, Cebpa, Kdm4c, Sp4, Tox3, Dhx9, Zfp281, Stat2, Bach2, Zfp946, Zfp292, Prkcb, Zfp790, Zfp94, Zfp109, Zbtb1, Pou2f2, AW146154, Irf8, Zbed3, Irf4, Sub1, Creb1, A…
23	Cullin repeat-like-containing domain	2.05216	Cul3, Cog8, Cul4b, Cul5, Cul2, Prr5
24	Negative regulation of IP-10 production	2.04957	Oas3, Gm49339, Oas1g, Oas1a, Oas1b
25	WWE domain	2.0296	Parp12, Dtx2, Dtx1, Zc3hav1, Parp11, Parp14, Rnf146
26	Proteasomal protein catabolic process	1.96832	Psmb8, Psma2, Psmb1, Cul4b, Psmb4, Trim21, Psma5, Psma7, Psmb9, Psmb10, Psma6
27	Proteolysis involved in cellular protein catabolic process	1.96135	Psmb1, Psmb4, Psma5, Gzma, Psma7, Mdm2, Ctso, Psma6, Psmb8, Ctsw, Psma2, Gzmb, Psmb10, Ctsz, Psmb9, Malt1
28	Positive regulation of autophagy	1.93004	Pik3c2a, Xbp1, Trim12a, Hpse, Map2k1, Trim21, Trim14, Trim30a, Trim34b, Igtp, Trp53inp1, Trim34a, Trim30d, Ufl1, Irgm1, Mtdh, Zc3h12a, Irgm2, Trim68, Tbk1, Trim30b, Lrrk2, Rb1cc1, Hif1a, Atg101, Trim30c, Depdc5
29	GTP binding	1.91515	Nudt16, Rala, Gpn1, Iigp1, Atl1, Gbp2, Gbp2b, Gbp3, Gbp5, Gbp6, Gbp7, Gbp9, Gbp10, Gbp11, Gnl2, Gimap7, Gbp2b, Rap1a, Tgtp1, Ifi47, Tgtp2, Iigp1c, Gucy2g, Gvin2, Gbp2, Gbp3, Gbp4, Gm4841, Rab29, Gm5431, Gm43302, Gvin1, Gvin2, Igtp, Irgm1, Irgm2, Mx1, Mx2, Rigi, Gbp3, Gbp7, Arl13b, Lrrk2, 9930111J21Rik2, Septin7, 9930111J21Rik1, Anxa6, F830016B08Rik, Pip4k2b, Gbp9, Gtpbp6, Gm12185, Rhot2, Ak4, Sam…
30	SH3-binding	1.89767	Sh3bp2, Dtx1, Evl, Cd2ap, Efs, Sh3bp1, Sh3kbp1, Elmo1, Vasp, Afap1, Plscr1, Sh3bgrl, Adam19
31	Positive regulation of cytoplasmic translation	1.83565	Paip1, Dhx36, Pkm, Csde1, Eef2, Syncrip, Dhx9
32	Sphingosine 1-phosphate receptor	1.802	S1pr2, S1pr4, S1pr5, S1pr3
33	Pleckstrin homology-like domain	1.73775	Adap1, Sbf1, Rock2, Plekhb2, Ccm2, Ppp4r3b, Osbpl8, Arhgap9, Rabgap1l, Elmo1, Gramd2b, Stap2, Plekho1, Plekha2, Sh3bp2, Rgs3, Phldb3, Dok5, Fgd2, Evl, Cyth1, Cert1, Plcg2, Arhgap27, Dock10, Arhgef6, Nsmaf, Sos1, Ptpn4, Ranbp2, Dock11, Arhgap15, Frmpd3, Arhgef3, Appl1, Carmil1, Obscn, Vasp, Necap1, Arhgap25, Swap70, Prkd3, Acap2, Ppp4r3a, Osbpl9, Krit1, Jak3, Frmd7, Arhgap26, Afap1, Msn, Kif1a, Cy…
34	Positive regulation of signal transduction by p53 class mediator	1.70156	Rps20, Rpl37rt, Rps15, Rpl11, Pml
35	Protein sumoylation	1.68989	Ube2i, Pias4, Sumo1, Ifih1, Senp6, Ranbp2, Bcl11a, Hmg20b, Topors
36	Tetratricopeptide repeat	1.6839	Ncf2, Skic3, Ranbp2, Sugt1, Ifit2, Rpap3, Tmtc4, Mau2, Fkbp8, Ifit1bl1, Ifit1, Odad4, Fancg, Ifit3b, Klc1, Ttc39b, Emc2, Naa15, Ifit1bl2, Tomm34, Appbp2, Ttc13, Ifit3, Unc45a, Kdm6a
37	Fc gamma R-mediated phagocytosis	1.66961	Cfl1, Hck, Arpc3, Arpc5, Rac2, Bin1, Ptprc, Pik3ca, Actr2, Arpc2, Arpc1b, Arpc5l, Map2k1, Prkcd, Plcg2, Vasp, Arpc4, Lat, Prkcb, Crk, Vav1
38	Ribosomal protein S5 domain 2-type fold, subgroup	1.64441	Top2b, Mrps9, Mvk, Pms1, Rps16, Mvd, Galk2, Eef2
39	MHC class I protein complex binding	1.6415	Klrc1, Tapbp, Klrd1, Tapbpl, Klrc2
40	BAR domain	1.63524	Sh3bp1, Appl1, Acap2, Bin1, Arhgap26, Snx5, Snx2, Bin3, Sh3gl2, Sh3glb2
41	C2H2-type 1	1.62312	Zbtb32, Zfp64, Zfhx2, Zhx1, Zfp458, Zfp770, Zfp26, Zbtb8a, Zbtb11, Dnajc21, Zfp513, Zfpm2, Zfp131, Zup1, Zfp445, Zfp120, Zfp263, Zfp14, Zfp182, Mynn, Zfp296, Aebp2, Zfp74, Klf8, Bcl11a, Sp4, Zbtb33, Klf12, Sp3, Zbtb5, Casz1, Zfp281, Rnf138, Zfp148, Ikzf3, Zfp62, Zfp239, Zfp518b, Zfp787, Zfp59, Zfp60, Hinfp, Prdm9, Zfp292, Zfp146, Zfx, Zfp280d
42	Positive regulation of interferon-gamma-mediated signaling pathway	1.61368	Irgm2, Nlrc5, Igtp, Parp9, Irgm1
43	Src homology-3 domain	1.5785	Ncf2, Hck, Arhgef6, Bin1, Mia3, Myo1f, Abi3, Sh3gl2, Sh3glb2, Dock2, Cd2ap, Pals1, Efs, Arhgap9, Obscn, Ppl, Stac2, Blk, Nebl, Abi1, Fnbp1l, Sash3, Neb, Nedd9, Samsn1, Sh3kbp1, Arhgap26, Plcg2, Tspoap1, Arhgap27, Crk, Vav1
44	C-terminal domain of RIG-I	1.55945	Rigi, Ifih1, Dhx58
45	5S rRNA binding	1.54695	Nop53, Rpl4, Rpl5, Mdm2, Rpl7, Eef2, Rpl11
46	Ubiquitin-like	1.538	Tbk1, Kxd1, Ublcp1, Fau, Sumo1, Isg15, Oasl2, Sacs, Rbck1, Ubl4a, Zfand4, Nedd8
47	Protein dephosphorylation	1.48534	Ctdspl2, Phpt1, Ppp1r12a, Ptpn4, Ptpn18, Pdp1, Ppp4r3b, Ublcp1, Pten, Ppp3cb, Bcl2, Ppp3cc, Ppm1k, Ssh3, Ptpn1, Ppp4r2, Ptprc, Ptprr, Ppp4r3a, Ppm1m, Ppp2cb, Ptpn6, Ptpn22, Ptpn2, Ppm1j, Dusp22, Dusp28
48	SAND domain	1.47909	Deaf1, Sp110, Sp140, Sp100
49	Inflammasome complex	1.449	Pycard, Casp4, Gsdmd, Casp1
50	Thioredoxin domain	1.44696	Txndc16, Prdx1, Pdia4, Tmx3, Txndc5, Erp44, Prdx6b, Txndc12, Txn1, Txndc9, Txndc11
51	DNA replication	1.4189	Mcmbp, Ccdc88a, Rbbp7, Fam111a, Rbms1, Orc4, Pold4, Wrnip1, Rev3l, Polh, Orc3, Samhd1, Poll, Lig4, Polk, Rmi2, Rbbp6, Polb
52	Monomeric IgA immunoglobulin complex	1.40882	Igkv3-3, Igkv18-36, Igha, Igkv3-5, Igkv3-2
53	Antigen processing and presentation of exogenous antigen	1.40334	Psme1, Psme2b, Mr1, Psme2
54	Actin filament binding	1.39553	Phpt1, Arpc5, Bin1, Myo1f, Cdk5r1, Vps16, Abi3, Hip1r, Myl4, Coro1a, Bloc1s6, Panx1, Capg, Coro7, Nebl, Cfl1, Arpc3, Fscn1, Ablim1, Limd2, Neb, Capza1, Tpm3, Actr2, Aif1, Arpc1b, Arpc2, Arpc5l, Coro1b, Myh13, Myo1g, Anxa6, Cotl1, Myo5a, Capza2, Arpc4, Eef2
55	DRBM 1	1.38685	Strbp, Eif2ak2, Adar, Stau2, Dhx9
56	Th1 and Th2 cell differentiation	1.37169	Ppp3cc, Nfatc2, Tbx21, Stat1, Runx3, Chuk, H2-Eb1, Il12rb1, H2-Oa, H2-Eb2, Il2rb, Jak3, Ppp3cb, Lat, Il2rg
57	WD repeat	1.36362	Wdr44, Rbbp7, Nsmaf, Brwd3, Hmgcr, Dcaf13, Wdr47, Eif2a, Pex7, Wdr43, Wdr6, Coro1a, Wdr38, Kctd3, Dennd3, Cfap52, Eml4, Coro7, Dmxl1, Phip, Rrp9, Pik3r4, Ppp2r2c, Plaa, Rack1, Arpc1b, Dcaf11, Coro1b, Rbbp5, Lrrk2, Strn3, Eed, Eml3, Wsb1, Nbeal2
58	Interleukin-6 production	1.35902	Azi2, Nod2, Tlr7, Tlr3, Myd88, Nod1, Tlr4, Ripk2, Bank1, Tnf
59	DEAH box	1.34676	Tdrd9, Fancm, Brip1, Chd2, Dhx36, Tdrd12, Ercc6l2, Dhx30, Hells, Chd7, Chx9, Ythdc2, Ercc2
60	Intracellular transport of viral protein in host cell	1.33014	Dynlt1f, Dynlt1c, Dynltab, Dynlt1a
61	Zinc finger, U1-type	1.30657	Dnajc21, Zfp346, Zfhx2, Matr3, Wbp4, Zfp593, Zfp638, Zfp318
62	Sterol biosynthesis	1.2949	Mvk, Idil, Hmgcs1, Cyb5r1, Pmvk, Msmo1, Mvd, Cyp51, Hmgcr
63	Interferon regulatory factor-3	1.27794	Irf7, Irf9, Irf8, Irf4
64	Tudor domain	1.27183	Tdrd9, Mtf2, Tdrd7, Kdm4c, Tdrd12, Ercc6l2, Pdf19, Vwa3b, Phf20
65	Toll-like receptor signaling pathway	1.24541	Ly96, Cd180, Tlr3, Pclg2, Unc93b1, Tlr4
66	SH2 domain	1.22571	Hck, Sh3bp2, Stat3, Bcar3, Stat1, Socs4, Hsh2d, Ptpn6, Stat2, Blnk, Jak3, Stap2, Socs1, Plcg2, Fes, Blk, Crk, Vav1
67	IBR-type	1.16354	Ankib1, Rnf19b, Rnf31, Cul9, Rbck1
68	Interleukin-15-mediated signaling pathway	1.16193	Il15ra, Il2rb, Stat3, Jak3, Il2rg
69	Thiol protease	1.16085	Capn9, Uchl1, Usp3, Capn10, Usp34, Usp44, Ctso, Casp1, Mindy3, Capn7, Otud1, Usp16, Ctsw, Usp27x, Otub1, Vcpip1, Pigk, Otulin, Senp6, Casp4, Usp18, Ctsz, Cyld
70	Translation protein SH3-like domain	1.14775	Eif5a2, Rpl26, Rpl6, Rpl27, Mrpl24
71	Protein transport	1.13491	Eif5a2, Napg, Cope, Lin7a, Exoc5, Mia3, Vps16, Ap1g2, Rabgap1l, Gopc, Cse1l, Pex1, Zfand6, Cog8, Unc119b, Snx10, Snap91, Arl6ip5, Vps4b, Vta1, Snx4, Coro7, Dennd1b, Lin7c, Xpo1, Rab29, Timm10b, Bcap29, S100a13, Pitpnm1, Tpr, Sec24a, Tap2, Chmp1a, Stxbp2, Serp1, Nxt1, Tap1, Rabep1, Praf2, Aktip, Ranbp2, Tram2, Atg3, Xbp1, Dtx3l, Tmed5, Pex7, Ipo7, Vps54, Gdi2, Hook3, Ap3m2, Snx2, Rab9, Necap1, Par…
72	Phosphatidylinositol signaling system	1.10546	Itpr2, Itpk1, Pik3c2a, Cdipt, Ppip5k2, Pik3ca, Pik3c2b, Inpp5f, Pten, Plcg2, Pi4kb, Inpp4b, Mtmr14, Prkcb, Pip4k2b, Pip4p1, Mtmr1
73	Drought induced 19/ RING finger protein 114	1.08739	Rnf166, Rnf138, Rnf114
74	Zinc finger, RanBP2-type	1.08221	Ranbp2, Rnnf31, Mdm2, Rbck1, Ewsr1, Zranb2
75	Canonical glycolysis	1.04424	Gpi1, Pkm, Pkfp, Eno3, Eno1, Pgk1
76	Peroxisome	1.04401	Mvk, Idi1, Atm, Mlycd, Serhl, Phyh, Hmgcr, Amacr, Scp2, Pex7, Ehhadh, Dnm1l, Pex1, Pipox, Lacc1, Far1, Atad1, Decr2
77	Phosphatidylinositol 3-/4-kinase, catalytic domain	1.04229	Atm, Pik3c2a, Atr, Pik3ca, Pi4kb, Pik3c2b
78	Axon cytoplasm	1.03321	Kif5b, Uchl1, Dtnbp1, Armcx3, Hspb1, Fmr1, Hif1a, Bloc1s6, Ap3m2, Bloc1s1, Kif1a, Kif5a, Bloc1s2
79	Cell division	1.0282	Mitd1, Klhl18, Rala, Bin3, Usp44, Cep55, Jtb, Smc5, Pds5b, Vps4b, Rps3, Nek3, Cntrl, Ccng2, Cenpj, Stag2, Sapcd2, Tpr, Sycp3, Chmp1a, Septin7, Fign, Chfr, Eml3, Mcmbp, Dynlt3, Lrrcc1, Setdb2, Dynlt1b, Cd2ap, Usp16, Ube2i, Nek6, Mau2, Abraxas2, Eml4, Septin6, Brcc3, Cul3, Rab11fip4, Kif20b, Clta, Hells, Nedd9, Septin3, Lig4, Ist1, Cdk3, Cep63
80	Toll-like receptor signaling pathway	1.01962	Ly96, Cd180, Tlr7, Cd86, Tlr3, Plcg2, Unc93b1, Tlr4
81	Zinc finger, CCHC-type	0.991728	Zcchc9, Zcchc7, Rbbp6, Tut4, Rbm4, Zcch2, Rtl4
82	Pseudouridine synthesis	0.986153	Pus3, Pus7l, Rpusd1, Nop10, Pusl1
83	CS-like domain	0.941029	Cyb5r4, Tdrd12, Ptges3l, Sugt1, Nudcd1
84	Zinc finger, CCCH-type	0.920646	Mbnl2, Zfp36, Rbm26, Parp12, Zc3h12d, Rbm27, Rc3h2, Zc3hav1, Zc3h15,
85	Aminopeptidase	0.902641	Dpp3, Aopep, Lnpep, Dpp4, Xpnpep2, Erap1, Tpp2
86	Tumour necrosis factor alpha/beta/c	0.89859	Ltb, Lta, Fasl, Tnf
87	AMP salvage	0.896674	Hprt1, Aprt, Ada, Adss2
88	Protein modification by small protein conjugation	0.896314	Uba7, Nae1, Uba6
89	Kelch repeat	0.895049	Klhdc9, Klhl36, Klhl10, Kbtbd8, Keap1, Klhl18, Klhl28, Dnah17, Lztr1, Rabepk, Klhl5, Klhl6
90	DNA-directed DNA polymerase	0.894287	Rev3l, Polh, Poll, Polk, Polb
91	L-serine biosynthetic process	0.880957	Phgdh, Psat1, Psph
92	Clathrin coat assembly	0.873956	Hip1r, Snap91, Clta, Fcho2, Nsg2
93	Domain of unknown function DUF1899	0.851739	Coro1b, Coro1a, Coro7
94	Zinc finger, AN1-type	0.826059	Zfand6, Zfand1, Zfand4
95	Hydrogen ion transmembrane transport	0.803705	Atp6v1f, Surf1, Atp5mf, Dmac2l, Atp5me, Atp6v1h, , Atp5mc2, Atp6v1c1, Atp6v1d
96	Protein K63-linked deubiquitination	0.795022	Brcc3, Usp27X, Abraxas1, Abrazas2, Cyld, Otud1
97	Response to zinc ion	0.791525	Slc30a3, Ass1, Crip1, Haao, Slc30a5, Slc30a4, P2rx5
98	GTPase effector domain, GED	0.782753	Dnm1l, Crebzf, Mx2, Mx1
99	Acetylcholine receptor signaling pathway	0.781016	Ly6c1, Chrnb2, Ly6c2, Ly6i, Ly6a, Ly6e
100	DNA cytosine deamination	0.779212	Aicda, Apobec1, Apobec3
101	Phox homologous domain	0.776655	Pik3c2a, Snx11, Snx8, Snx10, Snx5, Snx2, Snx4, Pik3c2b
102	Serine/threonine specific protein phosphatases	0.775368	Ppp3cc, Ppp3cb, Ppp2cb, Ppp4c
103	Positive regulation of T cell activation	0.774541	Pycard, Card11, H2-Eb2, B32m, Thy1, Coro1a, H2-Eb1, Ada, Malt1, H-Oa, Cyrib
104	Negative effector of Fas and TNF	0.76887	Daxx, Prkcd, Bid, Mdm2, Chuk, Xiap, Fasl, Tnf, Bcl2, traf1
105	Mannose trimming involved in glycoprotein ERAD pathway	0.768342	Man1a, Edem2, Edem1
106	BLOC-1 complex	0.760739	Kxd1, Dtnbp1, Bloc1s6, Bloc1s1, Bloc1s2
107	Tetrahydrofolate metabolic process	0.759644	Shmt1, Pipox, Mthfs, Mthfsl
108	Rhythmic process	0.75208	Mycbp2, Rock2, Rack1, Cdk5r1, Fbxl3, Srrd, Ube3a, Nampt, Clock, Setx, Dhx9, Creb1, Id2, Dnm1l, Siah2, Cipc, Ccar2, Bhlhe41, Pml, Piwil2
109	RNA phosphodiester bond hydrolysis, endonucleolytic	0.75151	Nudt16, Zc3h12d,
110	JAK-STAT cascade	0.74674	Il15ra, Stat2, Piasa4, Stat3, Jak3, Socs1, Stat1
111	Protein deubiquitination	0.71612	Uchl1, Usp3, Usp34, Usp44, Desi2, Otud1, Zc3h12a, Usp16, Usp27x, Otub1, Vcpip1, Usp18, Cyld
112	Mitochondrial substrate/solute carrier	0.714537	Slc25a19, Slc25a26, Slc25a40, Slc25a28, Slc25a22, Slc25a4, Slc25a32
113	Positive regulation of pyruvate dehydrogenase activity	0.712588	Ppm1j, pdp1, Ppm1m
114	Thioredoxin 1	0.704091	Pdia4, Txndc5, Txndc11
115	B cell receptor signaling pathway	0.698727	Card11, Ppp3cc, Sos1, Rac2, Nfatc2, Cd79a, Rasgrp3, Pik3ca, Chuk, Ptpn6, Pik3ap1, Cd72, Gm49339, Blnk, Map2k1, Ppp3cb, Plcg2, Cd22, Blk, Prkcb, Malt1, Bank1, Vav1
116	HEAT 1	0.687126	Togaram1, Relch, Xpo1, Pik3r4, Cand2, Atr, Sf3b1, Nipbl, Copb1, Mms19
117	Proteasome component (PCI) domain	0.678241	Eif3e, Cops7b, Gps1, Eif3a, Eif3m, Cops2
118	Nuclear-transcribed mRNA poly(A) tail shortening	0.666459	Zfp36, Cnot6l, Cnot2, Cnot7
119	Ubiquitin-conjugating enzyme/RWD-like	0.662715	Ube2i, Rnf25, Ube2ql1, Ube2d2a, Ube2j1, Ube2d3, Ube2b, Vps37a, Aktip, Ufc1
120	Pathways of neurodegeneration - multiple diseases	0.659601	Itpr2, Cdk5r1, Xbp1, Cox7a2l, Tnf, Cybb, Psmc6, Sem1, Map2k1, Ppp3cb, Ndufa3, Fasl, Slc25a4, Nox1, Bcl2, Kif5b, Uchl1, Uba7, Ppp3cc, Pik3r4, Psmb1, Ube2j1, Psma5, Psmb4, Psma7, Bid, Psma6, Klc1, Cox5a, Bax, Ndufs4, Atxn1, Tbk1, Psma2, Ndufa7, Lrrk2, Rb1cc1, Tank, Atp5mc2, Daxx, Camk2d, Ndufa13, Atg101, Dnah17, Kif5a, Prkcb, Cox7a1
121	GRAM	0.655105	Sbf1, Nsmaf, Gramd2b, Mtmr1
122	Ganglioside biosynthetic process	0.647273	St6galnac4, St8sia6, St8sia6, St8sia4, B3galt4, B4galnt1
123	Oxidoreductase, FAD-binding domain	0.643708	Cyb5r4, Cyb5r1, Cyb5rl
124	AAA+ ATPase domain	0.640658	Helz2, Abcb1b, Yme1l1, Gpn1, Orc4, Abcf3, Wrnip1, Psmc6, Tap2, Pex1, Nubp1, Tap1, Atad1, Fign, Vps4b, Ascc3, Ntpcr, Rnf213
125	Histidine box-1	0.631334	Peds1, Msmo1, Degs2, Scd2
126	JAB1/Mov34/MPN/PAD-1	0.612195	Mysm1, Brcc3, Eif3h
127	Actin-binding, cofilin/tropomyosin type	0.601561	Cfl1, Cotl1, Gmfb
128	Nucleoside diphosphate phosphorylation	0.592802	Cmpk1, Nme2, Cmpk2, Ak4
129	Protein kinase C-like, phorbol ester/diacylglycerol binding	0.569584	Ksr1, Prkd3, Rassf5, Prkcd, Rock2, Rasgrp3, Stac2, Prkcb, Rassf1, Vav1
130	Histone H3-K9 methylation	0.568638	Baz2a, Setdb2, Prdm9, Ehmt2
131	AP-1 adaptor complex	0.565074	Ap1s3, Ap1g2, Ap1s2
132	Histone deacetylation	0.561054	Morf4l1, Baz2a, Rbbp7, Hdac8, Mier1, Sin3b, Hdac7, Hdac9
133	Dedicator of cytokinesis	0.555425	Dock10, Dock11, Dock2
134	Dioxygenase	0.549612	Kdm4c, Haao, Phyh, Alkbh3, Hpdl, Riox2, Rsbn1, P4ha3, Egln2, Jmjd1c, Rsbn1l, Kdm6a, Egln3
135	Protein glycosylation	0.548954	St6galnac4, B4galt5, B3gnt2, B4galt2, B3galt5, St8sia4, Dpm3, Trip11, B3gnt5, Galnt7, Man1a, Serp1, Arfgef1, Poglut1, St8sia6, Gcnt1, B3galt4
136	Monocyte differentiation	0.548893	Ifi207, Ifi206, Ifi204, Sp3
137	Positive regulation of release of cytochrome c from mitochondria	0.541548	Pycard, Dnm1l, Tnfsf10, Bid, Casp1, Bax
138	Apoptotic signaling in response to DNA damage	0.539079	Atm, Bid, Stat1, Prkcb, Bax, Bcl2
139	Protein O-linked glycosylation	0.524635	Galnt11, Galnt7, B3gnt2, B3galt5, Poglut1, St8sia6, C1galt1c1, B3galt4, B3gnt5
140	Enoyl-CoA hydratase/isomerase, conserved site	0.523248	Ehhadh, Echdc1, Auh
141	Basic-leucine zipper domain	0.515778	Creb1, Atf6b, Cebpa, Crebzf, Bach2, Jund, Atf2, Creb3, Batf, Xb[i
142	Semaphorin-plexin signaling pathway	0.513471	Sh3bp1, Sema4a, Sema7a, Plxnc1, Sema3e, Sema4d
143	Speract/scavenger receptor	0.510343	Cd5, Cd6, Lgals3bp, Tmprss2, Tmprss13
144	NUDIX hydrolase domain-like	0.499677	Nudt16, Idi1, Dcp2, Nudt16l1, Mrpl46, Nudt13
145	WD 8	0.497315	Wdr44, Wdr6, Phip, Cfap52, Brwd3, Coro7, Eml4, Dmxl1, Eml3
146	Bromodomain	0.494839	Baz2a, 9930021J03Rik, Phip, Sp140, Brd8dc, Brwd3, Sp100
147	Methyl-CpG DNA binding	0.489309	Baz2a, Setdb2, Mbd4
148	WW domain	0.485639	Pqbp1, Cmtr1, Fnbp4, Wwox, Prpf40a, Wbp4, Arhgap27
149	Nucleocytoplasmic transport	0.484778	Ipo7, Cse1l, Xpo1, Npm1, Nxt1, Ranbp2, Rasl2-9, Rsrc1, Tpr
150	Growth Hormone Signaling Pathway	0.483696	Sos1, Srf, Map2k1, Socs1, Pik3ca, Ptpn6, Prkcb
151	Cilium assembly	0.474819	Togaram1, Rfx3, Pcm1, Cep83, Atp6v1d, Ro60, Dynlt2b, Unc119b, Cep162, Snx10, Cfap52, Septin6, Hyls1, Ccdc96, Fnbp1l, Sclt1, Ccdc28b, Ablim1, Dtnbp1, Cenpj, Rab29, Actr2, B9d1, Rilpl2, B9d2, Cfap54, Galnt11, Arl13b, Septin7, Iqcb1
152	Regulator of chromosome condensation, RCC1	0.465869	Mycbp2, Herc3, Herc6, Rcbtb1
153	NADPH oxidase complex	0.464775	Cybb, Ncf2, Nox1
154	SNARE complex	0.464031	Napg, Syn2, Bloc1s6, Stx8, Snx4, Stx7, Vti1b
155	L27	0.462668	Lin7c, Lin7a, Pals1
156	Ferric oxidoreductase	0.460528	Steap4, Cybb, Nox1
157	cDENN	0.449396	Dennd1b, Sbf1, Dennd3, Dennd10
158	Peptidase C2, calpain, domain III	0.44452	Capn9, Capn10, Capn7
159	Peptidyl-proline hydroxylation to 4-hydroxy-L-proline	0.443836	Ero1b, P4ha3, Egln2, Egln3
160	SMAD/FHA domain	0.438244	Cep170, Irf7, Snip, Irf9, Irf8, Kif1a, Chfr, Aptx, Irf4
161	mRNA processing	0.435751	Rbmx, Pqbp1, Pus7l, Cnot6l, Ptbp3, Esrp2, Gemin7, Aicda, Cstf3, Adar, Xrn2, Wbp4, Wtap, Tsen54, Ssu72, Pnpt1, Cdk13, Fmr1, Tra2a, Grsf1, Slu7, Snip1, Akap17b, Ccar2, Rsrc1, Rbm4, Syncrip, Cpsf6, Hnrnpa2b1, Bud13, Ppp4r2, Rbm27, Sf3b1, Prpf40a, Apobec1, Mbnl1, Ik, Dhx9, Ddx46, Mbnl2, Ddx20, Rbm26, Cmtr1, Celf2, Lsm8, Rbbp6, Srsf6, Zranb2
162	Septin complex	0.431648	Septin7, Septin3, Septin6
163	Hydrogen ion transport	0.430212	Atp6v1f, Atp5mf, Dmac2l, Atp5me, Atp6v1h, Atp5mc2, Atp6v1c1, Tcirg1, Atp6v1d
164	SARAH domain	0.425814	Rassf5, Rassf6, Rassf1
165	Protein palmitoylation	0.425092	Zdhhc2, Zdhhc20, Zdhhc21, Zdhhc18
166	DNA-directed RNA polymerase I complex	0.41272	Polr1d, Polr1f, Polr1h
167	Dynein complex	0.401716	Dnhd1, Dynlt1f, Dynlt3, Dynlt1c, Dynlt1b, Dynlt1a, Dnah17
168	Microtubule-based movement	0.400755	Dnhd1, Kif5b, Dynlt3, Dynlt2b, Kif20b, Dynlt1b, Kif1a, Klc1, Dnah17, Kif5a, Kif9
169	EGFR tyrosine kinase inhibitor resistance	0.394892	Sos1, Stat3, Rps6, Map2k1, Pten, Pik3ca, Plcg2, Prkcb, Bax, Bcl2
170	Phospholipid transport	0.37696	Atp11c, Tmem30a, Pitpnm1, Osbpl8, Scp2, Atp10a
171	SOCS box	0.375274	Socs1, Neurl2, Socs4, Asb2, Wsb1
172	S100/CaBP-9k-type, calcium binding, subdomain	0.370215	S100a4, S100a10, S100b, S100a13
173	Nucleocytoplasmic transport	0.366087	Ipo7, Cse1l, Xpo1, Npm1, Nxt1, Ranbp2, Rasl2-9, Rsrc1, Tpr
174	Negative regulation of delayed rectifier potassium channel activity	0.36364	Kcnab1, Kcne2, Sumo1
175	REPEAT:2-3	0.358515	Pqbp1, Clgn, Tmprss13, Syncrip
176	Cyclic nucleotide-binding domain	0.357115	Prkg2, Cnbd2, Kcnh7, Kcnh8, Rapgef6
177	Regulation of ARF protein signal transduction	0.353318	Git2, Cyth1, Arfgef1, Cyth4
178	Barbed-end actin filament capping	0.350401	Capza1, Capza2, Evl, Capg
179	Stimulatory C-type lectin receptor signaling pathway	0.348323	Klrc1, Klrd1, Klre1, Plcg2, Klrc2, Klrk1
180	core TFIIH complex	0.344541	Ccnh, Gtf2h5, Erc2
181	mRNA transport	0.341179	Zfp36, Hnrnpa2b1, Eif5a2, Fmr1, Fyttd1, Xpo1, Nxt1, Ranbp2, Igf2bp3, Parp11, Dhx9, Tpr
182	Zinc finger, PHD-type	0.340584	Phf11c, Baz2a, Mtf2, Phf6, Kdm4c, Phf11d, Phf19, Sp140, Phf20, Zfp729a, Zfp729b, Rsf1
183	LisH dimerisation motif	0.338198	Tocf1, Relch, Ranbp9, Wdr47
184	Negative regulation of signal transduction	0.329605	Rgs3, Trp73, Ddit4l, Socs1, Rgs18, Rgs13, Rgs19, Socs4
185	PAS domain	0.322207	Kcnh7, Hif1a, Kcnh8, Pde8b, Clock
186	PDZ domain	0.313942	Pdlim2, Pdzrn4, Lin7c, Rgs3, Rhpn1, Lrrc7, Ptpn4, Lin7a, Sdcbp2, Pals1, Frmpd3, Gopc, Rapgef6, Erbin, Synj2bp, Lnx2
187	SCF-dependent proteasomal ubiquitin-dependent protein catabolic process	0.313765	Fbxo33, Fbxl6, Fbxo4, Cul4b, Cul5, Fbxl13, Amn1, Cul2, Fbxl3
188	C-C chemokine binding	0.310703	Zfp36, Cxcr5, Ccr6, Cxcr3, Ackr2
189	Rho GTPase-activating protein domain	0.304086	Sh3bp1, Tagap, Arhgap26, Arhgap27, Arhgap15, Arhgap30, Arhgap25, Arhgap9
190	TRAM/LAG1/CLN8 homology domain	0.302597	Cers5, Tram2, Tlcd1
191	Protein peptidyl-prolyl isomerization	0.299788	Cwc27, Ranbp2, Nktr, Fkbp11
192	Cystathionine beta-synthase, core	0.299129	Clcn7, Clcn1, Prkag2
193	CDP-alcohol phosphatidyltransferase	0.29901	Cdipt, Chpt1, Cept1
194	REPEAT:9	0.294397	Cdipt, Chpt1, Gm9772
195	Granzyme A mediated Apoptosis Pathway	0.290112	Cdipt, Chpt1
196	Signaling of Hepatocyte Growth Factor Receptor	0.288894	Cdipt, Chpt1
197	Ricin B lectin domain	0.286451	Cdipt, Chpt1
198	Diacylglycerol/phorbol-ester binding	0.280195	Cdipt, Chpt1
199	Methylation	0.276021	Cdipt, Chpt1
200	S-geranylgeranyl cysteine	0.265773	Cdipt, Chpt1
201	Positive regulation of actin cytoskeleton reorganization	0.264751	Cdipt, Chpt1, Cop1
202	Detection of bacterium	0.263718	Cdipt, Chpt1
203	Sequence-specific DNA binding	0.263016	Cdipt, Chpt1
204	Positive regulation of transcription initiation from RNA polymerase II promoter	0.255085	Cdipt, Chpt1, Ttc3
205	Sphingolipid metabolic process	0.244217	Cdipt, Chpt1
206	von Willebrand factor, type A	0.241262	Cdipt, Chpt1
207	NADP-dependent oxidoreductase	0.233187	Cdipt, Chpt1
208	High mobility group (HMG) box domain	0.232031	Cdipt, Chpt1
209	PLC-like phosphodiesterase, TIM beta/alpha-barrel domain	0.23082	Cdipt, Chpt1
210	Mitochondrial electron transport, cytochrome c to oxygen	0.223389	Cdipt, Chpt1
211	Box 1 motif	0.219434	Cdipt, Chpt1
212	FERM	0.209938	Cdipt, Chpt1
213	Notch signaling pathway	0.205461	Cdipt, Chpt1, C1qtnf4
214	Immunoglobulin-like domain	0.201779	Cdipt, Chpt1, Iqcc
215	Zinc finger, FYVE-type	0.199293	Cdipt, Chpt1
216	FCH domain	0.188219	Cdipt, Chpt1, Iqsec3
217	Dbl homology (DH) domain	0.188192	Cdipt, Chpt1, No associated gene
218	LIM zinc-binding	0.186872	Cdipt, Chpt1, No associated gene
219	Peptidase C1A, papain C-terminal	0.186513	Cdipt, Chpt1, No associated gene
220	Leukocyte cell-cell adhesion	0.18128	Cdipt, Chpt1, No associated gene
221	Chromosome, centromeric region	0.180888	Cdipt, Chpt1, No associated gene
222	Arf GTPase activating protein	0.177332	Cdipt, Chpt1, No associated gene
223	JmjC domain	0.168345	Cdipt, Chpt1, No associated gene
224	Elongation factor	0.166559	Cdipt, Chpt1, No associated gene
225	K Homology domain	0.166005	Cdipt, Chpt1, No associated gene
226	Vesicle transport along actin filament	0.164974	Cdipt, Chpt1, No associated gene
227	Ras protein signal transduction	0.164357	Cdipt, Chpt1, S100g
228	Autoinhibitory domain	0.162623	Cdipt, Chpt1, Chil3
229	Carboxylic ester hydrolase activity	0.146407	Cdipt, Chpt1, Chil3
230	C2 calcium-dependent membrane targeting	0.145703	Cdipt, Chpt1, Eml2
231	Cadherin binding	0.139184	Cdipt, Chpt1, Agbl2
232	SANT/Myb domain	0.138295	Cdipt, Chpt1, Tex264
233	Myc-type, basic helix-loop-helix (bHLH) domain	0.137596	Cdipt, Chpt1, No associated gene
234	G-protein, gamma subunit	0.136619	Cdipt, Chpt1, No associated gene
235	Ets domain	0.127305	Cdipt, Chpt1, No associated gene
236	HECT	0.125585	Cdipt, Chpt1, No associated gene
237	Low-density lipoprotein (LDL) receptor class A repeat	0.123237	Cdipt, Chpt1, Dennd6a
238	Peptidyl-serine phosphorylation	0.122754	Cdipt, Chpt1, No associated gene
239	Electron transport	0.121929	Cdipt, Chpt1, Hlcs
240	Cadherin	0.120038	Cdipt, Chpt1, No associated gene
241	Iron-sulfur cluster binding	0.119819	Cdipt, Chpt1, 1700123O20Rik
242	NF-kB Signaling Pathway	0.116957	Cdipt, Chpt1, No associated gene
243	Gap junction channel activity	0.112041	Cdipt, Chpt1, Snrpd2
244	Ig-like C2-type 1	0.107796	Cdipt, Chpt1, No associated gene
245	Ig-like 1	0.10494	Cdipt, Chpt1, No associated gene
246	Calmodulin-binding	0.0991448	Cdipt, Chpt1, No associated gene
247	B cell receptor signaling pathway	0.0978867	Cdipt, Chpt1, Catsperd
248	Chromo domain-like	0.0963319	Cdipt, Chpt1, Zmynd15
249	CUB	0.0954712	Cdipt, Chpt1, No associated gene
250	Ankyrin repeat	0.0947863	Cdipt, Chpt1, No associated gene
251	Hormone activity	0.0933202	Cdipt, Chpt1, No associated gene
252	Motile cilium	0.0930369	Cdipt, Chpt1, No associated gene
253	Complement activation	0.0919611	Cdipt, Chpt1, No associated gene
254	Chloride channel complex	0.0788417	Cdipt, Chpt1, No associated gene
255	ABC transmembrane type-1	0.0782707	Cdipt, Chpt1, Gpr161
256	Metallopeptidase activity	0.0780464	Cdipt, Chpt1, No associated gene
257	Voltage-gated potassium channel activity	0.0776895	Cdipt, Chpt1, Gm11639
258	Sterile alpha motif domain	0.0761025	Cdipt, Chpt1, No associated gene
259	Transporter activity	0.0682664	Cdipt, Chpt1, 14930579G18Rik
260	protein tyrosine/serine/threonine phosphatase activity	0.0559846	Cdipt, Chpt1, Six5
261	Fibronectin type-III	0.0523637	Cdipt, Chpt1, Szrd1
262	ARM 1	0.0509286	Cdipt, Chpt1, Tiprl
263	Oxidoreductase	0.0472055	Cdipt, Chpt1, No associated gene
264	AGC-kinase C-terminal	0.0442643	Cdipt, Chpt1, No associated gene
265	Chemokine interleukin-8-like	0.0440375	Cdipt, Chpt1, No associated gene
266	Calponin-homology (CH)	0.0428588	Cdipt, Chpt1, No associated gene
267	Pyridoxal phosphate binding	0.0339092	Cdipt, Chpt1, Sft2d2
268	Anterior/posterior pattern specification	0.0336223	Cdipt, Chpt1, No associated gene
269	EF-hand-like domain	0.0317337	Cdipt, Chpt1, Psme4
270	RNA polymerase II transcription factor activity, ligand-activated sequence-specific DNA binding	0.026969	Cdipt, Chpt1, No associated gene
271	Growth factor activity	0.0255806	Cdipt, Chpt1, Plekhh2
272	Transcription regulator SCAN	0.0249608	Cdipt, Chpt1, No associated gene
273	Heme binding	0.0249396	Cdipt, Chpt1, No associated gene
274	Integral component of membrane	0.0237448	Cdipt, Chpt1, Reps2
275	Nucleosome assembly	0.0219679	Cdipt, Chpt1, Dlk1
276	Blood coagulation inhibitor, Disintegrin	0.0213311	Cdipt, Chpt1, Erf
277	GPCR, family 2, secretin-like	0.0192841	Cdipt, Chpt1, No associated gene
278	Calcium ion transport	0.0147281	Cdipt, Chpt1, Bsdc1
279	Ion transport	0.0106707	Cdipt, Chpt1, Crocc
280	Ig-like C2-type 3	0.0105587	Cdipt, Chpt1, No associated gene
281	Visual perception	0.00950435	Cdipt, Chpt1, No associated gene
282	Oxidoreductase activity, acting on paired donors, with incorporation or reduction of molecular oxygen	0.00919118	Cdipt, Chpt1, No associated gene
283	Immunoglobulin subtype 2	0.00589861	Cdipt, Chpt1, No associated gene
284	Major facilitator superfamily	0.00387719	Cdipt, Chpt1, Ino80d
285	Symporter activity	0.00272889	Cdipt, Chpt1, Rsph6a
286	Negative regulation of peptidase activity	0.0024496	Cdipt, Chpt1, Begain
287	Multicellular organism development	0.00159621	Cdipt, Chpt1, No associated gene
288	EGF-like calcium-binding	9.94072e-05	Cdipt, Chpt1, No associated gene
289	G-protein coupled receptor	5.95988e-05	Cdipt, Chpt1, No associated gene
290	Sodium ion transport	1.97606e-05	Cdipt, Chpt1, No associated gene
291	Extracellular space	7.66098e-07	Cdipt, Chpt1, No associated gene

## Sheet: Table S2C
Table S2C. DAVID functional clustering of DEGs (P < 0.05) in the spleens of TMEV-infected mice on day 35 p.i.
Cluster	Pathway	Enrichment Score	Genes
1	Ribosomal protein	42.2965	Rpl36, Rpl5, Rpl35a, Mrps5, Rps27a, Rpl29, Rpl14-ps1, Mrpl21, Rps27, Rpl13a, Rpl23, Rpl4, Rpl39, Rplp1, Rpl30, Rps5, Rpl13, Rpl37rt, Rpl8, Dap3, Mrpl4, Mrps23, Rps6kl1, Rps2, Mrps18a, Rplp0, Mrpl2, Rps13, Rplp2, Rpl22l1, Rps16, Mrps17, Rpl31, Rps24, Rpl36a, Rpl26, Rps25, Rpl7, Rps12, Rpl24, Rps28, Mrps34, Mrps25, Mrpl1, Rps4x, Rps15a, Rpl10, Rps19, Rps7, Rpl17, Rps23, Mrpl43, Rplp1rt, Rpl41, Mrps…
2	Mitochondrial inner membrane	37.9845	Idh2, Mpv17l2, Hccs, Atad3a, Cox7b, Slc25a33, Mrps5, Slc25a12, Coq2, Tufm, Mrpl21, Acaa2, Ndufa2, Ndufb7, Ndufa3, Slc25a4, Uqcr10, Ptpmt1, Slc25a22, Coq10b, Timm10b, Dap3, Mrpl4, Coq4, Ndufs3, Mrps23, Surf1, Mrps18a, Uqcrq, Higd2a, Tmem11, Mrpl2, Slc25a45, Tmem242, Timm13, Ndufa13, Mrps17, Cox6b1, Coq7, Slc25a3, Uqcc4, Rab5if, Vdac2, Rhot2, Cox7a2l, mt-Nd4l, mt-Nd4l, Ndufb10, Romo1, Atp5me, Timm2…
3	Transit peptide	27.816	Idh2, Cox7b, Rpusd4, Coq2, Mcat, Pnpt1, Tars2, Tufm, Mrpl21, Acaa2, Naxe, Echs1, Ptpmt1, Stard7, Coq10b, Sucla2, Dap3, Fars2, Coq4, Ndufs3, Mrps18a, Mtif2, Mrpl2, Naxd, Mrps17, Coq7, Star, Ndufaf7, Fdx2, Slc25a3, Phyh, Bckdha, Cox7a2l, Trmt10c, Oxa1l, Glrx2, Uqcrh, Ndufc1, Parl, Bckdk, Ndufb11, Alas1, Tfb2m, Letm1, Ears2, Mrpl1, Mterf1b, Mterf1b, Hmgcl, Pet100, Atpaf1, Metap1d, Smdt1, Ndufs7, Pre…
4	Ribosomal small subunit biogenesis	23.7543	Imp3, Imp4, Ngdn, Aatf, Surf6, Nob1, Utp11, Rps27, Dhx37, Dnttip2, Rps5, Rps6, Nop56, Rps6-ps4, Emg1, Rps13, Wdr36, Rps16, Pwp2, Rps9, Rps24, Rps25, Tbl3, Rps12, Dimt1, Rps17, Fbl, Rps28, Wdr43, Rps8, Rps14, Nol7, Mphosph10, Ercc2, Mettl17, Rps15a, Rps19, Rps15, Rps7, Fcf1, Wdr46, Rps23, Rps19bp1, Pno1, Utp3, Nop14, Ltv1, Rps27rt, Rps27rt, Rps3a1
5	Glycyl lysine isopeptide (Lys-Gly) (interchain with G-Cter in SUMO2)	12.2999	Gpatch4, Psmd4, Snrnp48, Arid4a, Llph, Bmal2, Dnttip2, Erf, Zfp280c, Snrnp70, Suds3, Polr2e, Rpl13, Nop56, Kansl2, Zfp689, Tomm70a, Zfp184, Zfp90, Rbbp5, Rsbn1, Cetn2, Slx4, Rpl26, Rsl1d1, Csrp1, Dmap1, Rpl24, Ebna1bp2, Tra2a, Cfl1, Rps4x, Rpl10, Rps7, Rbm39, Paf1, Chtop, 4931414P19Rik, Mis18a, Jdp2, Rmi1, Zfp687, Smarce1, Knop1, Kdm5a, Dus3l, Itgb3bp, Polr3d, Hdgfl2, Ddx42, Ftsj3, Rps3, Rpl12, H…
6	Oxidative phosphorylation	10.3218	Atp6v0b, Cox7b, mt-Co3, mt-Atp8, mt-Atp6, Ndufa12, mt-Co1, mt-Co2, Ndufab1, Ndufa2, Ndufb7, Ndufa3, Ndufs8, Uqcr10, mt-Nd6, mt-Nd6, Ndufs3, Uqcrq, mt-Nd3, mt-Nd4, Atp6v1g1, Cox7c, Ndufa13, Cox6b1, Ndufb5, Cox10, Cox7a2l, mt-Nd4l, mt-Nd4l, Ndufb10, Atp5f1e, mt-Cytb, Atp5me, Uqcrh, Cox4i1, Ndufc1, Ndufc2, Ndufb11, Cox6c, Atp5mg, Atp6v1f, Atp5f1d, Ndufa6, Ndufa8, mt-Nd2, Ndufs7, Cox5a, Ndufv3, Ndufs…
7	mRNA processing	7.76229	Sugp1, Brdt, Esrp2, Mettl3, Snrpd2, Rpusd4, Gemin7, Frg1, Syf2, Xab2, Wtap, Dus3l, Sf3a3, Tsen54, Rrp1b, Snrnp48, Pnpt1, Habp4, Trmt2a, Luc7l3, Clns1a, Lsm1, Ess2, Srek1ip1, Cpsf1, Nol3, Prpf39, Sart3, Srsf12, Isy1, Hnrnph1, Trub2, Srsf7, Rbm4b, Ppie, Prpf38b, Pabpn1, Wdr83, Cpeb1, Sf3b1, Puf60, Snrpb, U2af1, Ddx46, Tut1, Hsf1, Hnrnpa1, Cmtr1, Ddx39b, Rbm8a, Srsf6, Sart1, Scnm1, Khdc4, Gpkow, Cac…
8	Endoplasmic reticulum	5.39688	Rcn2, Tmem203, Pigf, Hmgcr, Cnpy3, Peds1, Zdhhc1, Pigt, Jkamp, Srprb, Alg8, Ccdc115, Trappc9, Dus2, Zfyve27, Pgrmc1, Tmc6, Ptgds, Rab5if, Trappc3, Hmgcll1, Pomgnt2, Hacd2, Tmcc1, Armc10, Cers5, Dad1, Slc39a13, Fzd6, Mttp, Cers4, Atp10a, Clcn4, Ctsw, Pigm, Hacd3, Degs1, Eogt, Tmc8, Cyp4f18, Ces1d, Use1, Lmf1, Zdhhc16, Gpaa1, Bfar, Sar1b, Tmcc3, Cyp26a1, Pomk, Spcs1, Nenf, 1600014C10Rik, Anp32a, Mg…
9	Nucleic acid binding	5.28918	Gpatch4, Pop7, Sf3a3, Pnpt1, Dhx33, Rexo1, Eif4a2, Eef1akmt1, E130201H02Rik, Dazap1, Srek1ip1, Rbm34, Piwil4, Ddx55, Srsf7, Rbm4b, R3hcc1l, Pabpn1, Cpeb1, Ddx18, Snrnp70, Puf60, U2af1, Tut1, Hnrnpa1, Cmtr1, Srsf6, Rpp25l, Eif3g, Ppargc1b, Gpatch1, Safb2, Toe1, Ddx41, Zfp593, Srsf5, Tra2a, Zcchc10, Ercc2, Max, Eif4a1, Mterf1b, Mterf1b, Tigd2, Lemd3, Rbm39, Nifk, Rybp, Cenpb, Sugp2, Polr2i, Zfp830,…
10	Zinc-finger	4.5732	Rchy1, Vps8, Rpap2, Adap1, Fbxo43, Zfp511, Thap7, Rps27a, Rnf167, Snrnp48, Zfp213, Rlim, Zfp628, Git1, Zfp280c, Rbm4b, Lrsam1, Rpl37rt, Patz1, Zfp689, E4f1, Zfp184, Trim11, Zfp90, Polk, Zfp414, Zfp653, Fbxl19, Capn15, Zfyve27, Nr2f1, Zc3h15, Ash2l, Slx4, Araf, Zfp593, Trim25, Traf4, Zfp598, Zfp472, Traf7, Zcchc10, Klf9, Smyd4, Zfp329, Ebf2, Zbtb49, Zfp444, Zfp830, Faap20, Gtf3a, Zfp212, Zfp687, N…
11	Methylation	4.27209	Ndufaf7, Mettl25, Etfbkmt, Mtap, Setd6, Mettl3, Smyd3, Prmt5, Prmt6, Coq3, Dimt1, Mettl1, Hnmt, Comtd1, Eef2kmt, Eef1akmt1, Trmt10c, Fbl, Trmt2a, N6amt1, Ftsj3, Nsun5, Ehmt2, Eef1akmt2, Trmt1, Tfb2m, Antkmt, Smyd4, Pcif1, Mettl17, Kmt5c, Tomt, Mettl2, Mepce, Prmt2, Emg1, Bud23, Cmtr1, Trmt11, Mettl23, Smyd5, Mettl22
12	Translation protein SH3-like domain	3.35571	Rpl14-ps1, Rpl14-ps1, Rpl21, Mrpl2, Rpl26, Rpl6, Rpl14, Rpl8, Rpl27, Mrpl24, Gpkow
13	RNA polymerase	2.96711	Polr2c, Polr3g, Polr1d, Polr3e, Polr2f, Polr1b, Polr2e, Polr1f, Polr3h, Polr1g, Polr2d, Polr2h, Polr3d, Polr2i, Polr2l
14	Zinc finger, RING-type	2.937	Rchy1, Rnf34, Vps8, Trim71, Rnf167, Neurl1a, Bfar, Vps41, Pcgf2, Siah1a, Cgrrf1, Trim17, Rlim, Rnf103, Rnf181, Lrsam1, Trim5, Rnf187, Rnf130, Mnat1, Lnx1, Trim47, Trim11, Phf7, Rnf225, Siah2, Rnf5, Pcgf6, Pja1, Rnf215, Rnf41, Rnf44, Mex3d, Ring1, Traf2, Trim25, Traf4, Rnf144a, Mkrn2, Rnf166, Rnf186, Zftraf1, Rnf126, Zfp598, Traf7, Topors, Rnf25, Trim39, Rnf220, Rbck1, Zfpl1, Znrf3, Trim15, Nhlrc1…
15	Ubiquitin ligase inhibitor activity	2.73762	Rpl5, Rps20, Rpl37rt, Rps15, Rps7, Rpl11, Rpl37, Cdkn2a, Rpl23
16	Cytochrome-c oxidase activity	2.63315	Surf1, mt-Co1, Cox7b, mt-Co2, Cox4i1, mt-Co3, Cox5a
17	TRAPPII protein complex	2.52293	Trappc9, Trappc4, Trappc13, Trappc14, Trappc1, Trappc2, Trappc3, Trappc2l
18	WD repeat	2.50928	Vps8, Eml5, Wdr74, Gnb2, Hmgcr, Llgl2, Eml1, Wdr70, Strn4, Wdr83, Dcaf8, Rack1, Nle1, Nwd2, Dcaf4, Wrap73, Wdr37, Bop1, Edc4, Rbbp5, Wdr45, Eed, Wdr36, Pwp2, Katnb1, Wdr5b, Eml3, Aamp, Tbl3, Wdr24, Wdr43, Wdr38, Wdr89, Traf7, Grwd1, Wdr54, Med16, Wdr13, Ppp2r2a, Ppp2r2d, Wdr73, Dcaf11, Wdr4, Wdr77, Wdr46, Rae1, Strn3, Dcaf12l1, Eipr1
19	G-patch domain	2.29279	Sugp1, Cmtr1, Gpatch4, Rbm17, Sugp2, Gpatch1, Gpank1, Gpatch11, Gpkow
20	U2-type prespliceosome	2.26448	Luc7l3, Luc7l2, Sf3b1, Snrnp70, Luc7l, Prpf39, U2af2, Snrpb
21	Mitochondrial outer membrane translocase complex	2.14293	Tomm22, Tomm6, Tomm5, Tomm20, Tomm40l, Tomm70a
22	Cellular response to DNA damage stimulus	2.09592	Nhej1, Bmyc, Mettl3, Zdhhc16, Ercc5, Xab2, Mms19, Gtf2h1, Gnl1, Aatf, Exo5, Uimc1, Hdgfl2, Mcrs1, Rps3, Fbxo31, Xrcc1, Gtf2h5, Eme2, Bccip, Ttc5, Ikbkg, Chd2, Faap100, Slx1b, Bbc3, Adprs, Brat1, Pnkp, Cradd, Cdk9, Flywch1, Hsf1, Cenps, Polk, Rbbp5, Cib1, Actr5, Macrod1, Cetn2, Babam1, Egln3, Rad52, Ash2l, Slx4, Ube2n, Pagr1a, Prmt6, Ier3, Mpg, Nrde2, Fancb, Sirt7, Usp16, Morf4l1, Otub1, Akt1, Apb…
23	Transcription regulation	2.06241	Rpap2, Brdt, Zfp511, Thap7, Limd1, Rrp1b, Nfe2l3, Med29, Arid4a, Cdkn2a, Bmal2, Zfp213, Mcrs1, Rfxank, Alkbh4, Vps36, Dnttip2, Rlim, Zfp628, Atf5, Chd2, Erf, Zfp280c, Suds3, Hdac4, Tead3, Prr13, Cdk9, Zfp689, Tchp, Esf1, Crtc1, E4f1, Zfp184, Hmga1, Zfp90, Rbbp5, Ccnh, Chmp1a, Rsbn1, Sra1, Zfp414, Zfp653, Nr2f1, Dapk3, Ash2l, Dnajc2, Ppargc1b, Erbb2, Edf1, Dmap1, Zfp593, Rela, Lyl1, Traf7, Brd9, K…
24	DNA/RNA helicase, DEAD/DEAH box type, N-terminal	2.02866	Ddx49, Ddx55, Eif4a1, Ddx39a, Ddx56, Dhx30, Ddx18, Ddx41, Ddx50, Ddx54, Skic2, Dhx33, Eif4a2, Ddx46, Hfm1, Ddx39b, Ddx42, Dhx37
25	RNA recognition motif domain, eukaryote	1.87871	Rbm17, U2af1l4, Pabpc4l, Zrsr2, Htatsf1, Srsf2, Rbm39, Puf60, U2af1
26	Peroxisome	1.8553	Mvk, Prdx1, Mpv17l2, Idh2, Hmgcl, Ephx2, Abcd2, Abcd4, Phyh, Pex6, Crot, Pex19, Gstk1, Prdx5, Pex5, Slc27a2, Hacl1, Hmgcll1, Pxmp4, Ech1, Acot8
27	Protein export	1.84697	Mvk, Prdx1, Mpv17l2, Idh2, Hmgcl, Ephx2, Abcd2, Abcd4, Phyh, Pex6, Crot, Pex19, Gstk1, Prdx5, Pex5, Slc27a2, Hacl1, Hmgcll1, Pxmp4, Ech1, Acot8
28	Membrane insertase activity	1.84655	Emc2, Emc8, Cox18, Oxa1l, Emc4, Mtch1, Emc6, Timm9, Emc1
29	Peptidyl-prolyl cis-trans isomerase activity	1.83563	Ppihl, Ppie, Fkbp9, Pin4, Ppig, Aip, Ppif, Cwc27, Fkbp3, Fkbp8, Fkbp2, Ppil4, Ppia
30	Maturation of LSU-rRNA	1.82648	Mrpl1, Rpl10a, Nsa2, Las1l, Rpf1, Rsl1d1, Eif6
31	Translational initiation	1.82016	Eif5b, Eif4a1, Eif2b2, Eif1b, Eif1ad2, Eif6, Eif2b5, Dhx33, Eif4a2, Denr, Mtif2, Eif3g, Eif1ad6, Eif3k
32	Zinc finger, RanBP2-type	1.73128	Rybp, Zranb1, Taf15, Rbck1, Ewsr1, Capn15, Sharpin, Fus
33	GPI anchor biosynthetic process	1.69236	Dpm1, Pigm, Pigu, Pigo, Slc30a5, Pigf, Pigx, Pigh, Dpm3, Gpaa1, Pgap3, Pigt
34	Cellular respiration	1.63577	Ndufs4, Uqcr10, mt-Cytb, Uqcrq, Slc25a25, Uqcrh, Chchd5, Coq10b, Cox10, Bax
35	Aminoacyl-tRNA ligase activity	1.61115	Ears2, Sars1, Mars1, Fars2, Vars1, Tars2, Sars2, Farsa, Aars2, Qars1, Cars2, Lars2, Dalrd3
36	Nucleotide-excision repair	1.59493	Slx4, Gtf2h4, Ogg1, Ercc5, Commd1, Cetn2, Gtf2h5, Gtf2h1, Mnat1, Ercc2
37	S4 RNA-binding	1.58513	Mtres1, Rps9, Imp3, Rps4x
38	Positive regulation of JUN kinase activity	1.58397	Map3k11, Mapk8ip3, Irak1, Fzd10, Dab2ip, Il1rn, Ror2, Traf2, Vangl2, Wnt5a, Map2k7, Ccl19, Dvl2, Map4k2, Rps3
39	Iron-sulfur cluster binding	1.53636	Lias, Ndufs8, Fdx2, Ciao3, Dph2, Ndufs7, Iscu, Bola2, Exo5, Nubp1, Ndufs2, Glrx2, Rtel1, Dph1, Ddx11, Ercc2
40	Cx9C motif 1	1.42512	Chchd7, Chcd5, Ndufb7, Chchd2, Ndufa8, Chchd1
41	TRASH	1.38325	Zmym6, Rpl24, Zmym5, Rsl24d1
42	Positive regulation of stem cell population maintenance	1.36909	Smarce1, Brms1, Bcl7b, Bcl7c, Suds3, Ss18, Sap30l, Tead3, Arid4b, Arid4a, Brd9, Hdac1
43	Protein deacetylation	1.31085	Hdac6, Hdac4, Hdac3, Ripk3, Sirt3, Hdac5, Sirt7, Hdac1
44	tRNA wobble uridine modification	1.30289	Elp5, Ctu2, Urm1, Elp6, Kti12, Ctu1
45	Twin CX3C motif	1.24556	Timm13, Timm8b, Timm10b, Timm9
46	Zinc finger, U1-type	1.22366	Dnajc21, Tut1, Zfp385c, Zfp622, Zfp830, Matr3, Wbp4, Zfp593
47	Nascent polypeptide-associated complex NAC domain	1.21553	Nacad, Btf3l4, Naca
48	Ubiquinone biosynthetic process	1.20041	Pdss2, Fdxr, Coq3, Coq2, Coq10b, Coq7, Coq4
49	MIR motif	1.13412	Ryr2, Ryr3, Sdf2, Pomt2
50	Tetratricopeptide-like helical	1.12682	Snx21, Coa7, Cope, Noxa1, Smyd3, Xab2, Klc4, Klc2, Nrde2, Pex5, Vps41, Ttc4, Aip, Mau2, Fkbp8, Prpf39, Sart3, Stub1, Ttc5, Smyd4, Ppp5c, Crtap, Anapc7, Klc3, Ttc33, Tcf25, Ttc34, Tomm70a, Gtf3c3, Emc2, Fem1a, Fis1, Ttc13, Smyd5, Npm3, Unc45b, Sh3tc1, Ttc23, Unc45a
51	Matrin-type	1.118	Tut1, Matr3, Wbp4, Trit1, Sf3a3, Scnm1
52	Spliceosomal snRNP assembly	1.08893	Clns1a, Gemin7, Snrpe, Snrpd2, Lsm4, Prmt5, Sart3, Wdr77, Snrpb
53	Ubiquitin system component Cue	1.08778	Cuedc1, Cuedc2, Tollip, Aup1
54	Solcar 1	1.08258	Slc25a18, Slc25a33, Slc25a25, Slc25a3, Slc25a45, Slc25a11, Slc25a12, Slc25a28, Slc25a22, Mtch1, Slc25a4
55	Epoxide hydrolase-like	1.08012	Cuedc1, Cuedc2, Tollip, Aup1
56	Sin3 complex	1.04934	Morf4l1, Brms1, Suds3, Sap30l, Sin3b, Arid4b, Arid4a, Hdac1
57	Helicase-like, DEXD box c2 type	1.04509	Rtel1, Ddx11, Ercc2
58	pre-mRNA 3'-splice site binding	1.04022	U2af1l4, Zrsr2, U2af2, U2af1
59	Brix domain	1.02564	Ppan, Rpf1, Imp4
60	NEUZ	1.02564	Neurl2, Neurl1a, Neurl3
61	Hydrogen ion transmembrane transport	1.01995	Atp6v1f, Atp5mg, Atp6v0b, Fxyd2, Atp1a2, Atp5f1d, mt-Atp8, Surf1, Atp5f1e, Atp5me, Tmco3, Atp5mc2, Atp6v1g1, Slc4a11, Tmem175, Atp6v0e, Rnasek
62	HAT 1	1.01145	Xab2, Prpf39, Sart3, Nrde2
63	Intracellular transport of viral protein in host cell	1.00202	Dynlt1f, Dynlt1c, Dynlt1b, Dynlt1a
64	Lysosomal membrane	0.991985	Ifitm1, Vps16, H2-Ob, Abhd6, Rnf167, Tpcn2, Klc2, Vps41, Nprl3, Wdr24, Ifitm2, Ocln, Slc49a4, Stx8, Slc2a6, Lamtor4, Cln3, Lamtor1, Pip4p1, Nprl2, Vamp8, Vps18, Lrrc8a, Ap1m1, Psen2, Mcoln1, Abcd4, Tmem192, Abcb9, H2-Oa, Vti1b, Neu1, Plekhm2, Lamtor5, Glmp, Bri3, Clcn4, Chmp5, Snapin, Chmp1a, H2-M2, Atp6v1g1, Tmem175, Tmem150c, Atp6ap2, Vps33b, Ubxn6
65	SNAP receptor activity	0.988916	Stx19, Use1, Stx4a, Bet1l, Stx8, Ykt6, Vamp1, Pick1, Vti1a, Vti1b, Vamp8, Vamp2
66	DIX domain	0.881164	Dvl2, Dvl1, Axin2
67	Iron-sulfur cluster assembly	0.861674	Iscu, Nubp1, Fdx2, Ndor1, Ciao3, Ndufab1, Ciao2b, MMs19
68	Carbohydrate transport	0.859817	Slc35a2, Slc35b1, Akt2, Akt1, Slc35a1, Slc2a8, Slc37a1, Slc2a6, Slc35a5
69	Proteasomal protein catabolic process	0.85711	Fbxo44, Psmb3, Rnf41, Psmb5, Psma3, Psmb1, Socs6, Psmb4, Psma7, Vhl
70	Fatty-acyl-CoA binding	0.854859	Acadvl, Dbi, Acadm, Hmgcl, Acad9, Acbd3, Acbd6
71	Wnt signaling pathway, planar cell polarity pathway	0.845637	Dvl2, Dvl1, Fzd6, Ror2, Vangl2, Wnt5a
72	Dioxygenase activity	0.831437	Tyw5, Jmjd4, Kdm5a, Phyh, Alkbh6, Bbox1, Riox2, Ogfod2, Rsbn1, Ethe1, Alkbh4, Riox1, Rsbn1l, Egln3, Kdm8
73	Lipid biosynthesis	0.815319	Mvk, Fdps, Ptgds, Hmgcr, Mcat, Elovl7, Pcyt2, Ptges2, Ndufab1, Ptdss1, Hacd2, Cyp27a1, Cers2, Cyb5r1, Ptpmt1, Acbd3, Cers5, Tm7sf2, Cers4, Gpat2, Cyb5r3, Serinc4, Chkb, Hacd3, Degs1, Pgs1, Agpat1, Selenoi, Lss, Isyna1
74	mRNA pseudouridine synthesis	0.801111	Pus3, Trub2, Rpusd4, Trub1
75	Quinonprotein alcohol dehydrogenase-like superfamily	0.796728	Aamp, Mapk8ip3, Eml5, Wdr36, Tbl3, Nle1, Pwp2, Nwd2, Emc1, Eml1, Eml3
76	Helicase-associated domain	0.791685	Dhx35, Dhx30, Dhx34, Dhx37, Dhx33
77	Interleukin-1-mediated signaling pathway	0.764644	Rela, Irak, Ikbkb, Irak2, Tollip
78	Histone acetyltransferase complex	0.763207	Morf4l1, Ing5, Mcrs1, Brpf1, Kansl2, Jade1, Kansl3, Msl3l2
79	Cholesterol metabolic process	0.746291	Star, Mvk, Fdps, Cyp27a1, Ces1d, Cebpa, Erlin1, Srebf2, Hmgcr, Mttp, Npc2, Tm7sf2, Pctp, Fdxr, Cyb5r3, Ldlrap1, Srebf1, Smpd1, Pip4p1
80	DEP domain	0.74543	Rgs9, Dvl2, Rgs6, Rapgef4, Dvl1
81	Endosome to lysosome transport	0.741857	Vps18, Chmp5, Snapin, Stx8, Hook2, Tsg101, Vps16, Vps41
82	START-like domain	0.738033	Stard3, Star, Coq10b, Pitpnm1, Pctp
83	TNF/Stress Related Signaling	0.724149	Ikbkg, Rela, Map4k2, Ikbkb, Cardd, Tradd, Traf2
84	N-terminal peptidyl-glutamic acid acetylation	0.71163	Naa20, Naa10, Naa12, Txnl4a, Tnxl4a
85	Aspartate transport	0.708197	Lrrc8a, Slc25a18, Slc25a12, Slc25a22
86	Positive regulation of release of cytochrome c from mitochondria	0.70109	Pycard, Bnip3, Bmf, Ppif, Bbc3, Pdcd5, Mllt11, Bax, Pink1
87	RNA catabolic process	0.694923	Exosc5, Exosc1, Pnpt1, Skic2, Exosc4
88	Positive regulation of transcription elongation from RNA polymerase II promoter	0.6872	Pwwp2a, Med16, Ell, Med4, Med28, Med30, Eapp, Med29, Cdk9, Med10
89	NLI interacting factor	0.6723	Ctdp1, Ctdsp1, Ctdnep1
90	Skeletal muscle cell differentiation	0.669935	Emd, Lemd3, Lemd2, Hmg20b, Zfp689
91	Sphingolipid biosynthetic process	0.664228	Cers2, Hacd3, Degs1, Cers5, Hacd2, Cers4, Elovl7
92	Zinc finger, TRAF-type	0.656702	Traf4, Zftraf1, Traf7, Traf2
93	SAP domain	0.646194	Sltm, Pias4, Safb2, Sarnp, Ccar1
94	COP9 signalosome	0.646026	Cops9, Cops3, Cops6, Gops1
95	Transcription regulator SCAN	0.643132	Zfp213, Zfp449, Zkscan14, Zkscan17, Zkscan6, Scnad1, Zscan18, Zfp444
96	MLL1 complex	0.633814	Hcfc2, Ash2I, Max, Rbbp5, Ruvbl2, Mcrs1, Las1l, Pelp1
97	Arf GTPase activating protein	0.629161	Git1, Adap1, Arfgap2, Agap3, Asap3
98	Lys48-specific deubiquitinase activity	0.622515	Usp27x, Usp36, Mindy4, Atxn3, Desi2, Mindy1
99	GAT	0.61912	Tom1, Gga1, Gga3
100	ER to Golgi transport vesicle	0.617456	Tmed9, Ire3ip1, Tmed4, Tex261, Ergic1, Tmed1, Yif1a, Ddhd2, Vangl2
101	Histone-arginine N-methyltransferase activity	0.614233	Prmt6, Prmt5, , Prmt2
102	Apoptotic mitochondrial changes	0.610076	Jtb, Akt1, Ppif, Rnf7, Dap3, Slc25a4, Cdkn2a, Bax, Bcl2
103	Nuclear exosome (RNase complex)	0.5981	Exosc5, Wdr74, Exosc1, Mphosph6, Exosc4
104	ZnF_C2H2	0.594608	Dpf1, Zfp944, Zfp788, Zfp622, AW146154, Zfp511, Zfp932, Zfp619, Zfp280b, Zfp160, Zfp58, Zfp758, Gm14399, Dnajc21, Zfp553, Zbtb44, Zfp213, Insm1, Gm15446, Zfp943, Zfp992, Zfp384, Zfp335, Zfp628, Zfp983, Zfp219, Zfp418, Zfp280c, 2810021J22Rik, Sall2, Zfp967, Zkscan14, Zfp65, Zfp991, Zfp952, Patz1, Zfp689, Zfp184, E4f1, Zfp319, Zfp90, Dzip1, Zfp956, Zfp692, Fiz1, Zfp787, Zfp1005, Hinfp, Zfp414, Zfp6…
105	Positive regulation of TOR signaling	0.585993	Wdr24, Lamtor5, Hdac3, Lamtor4, Lamtor1
106	Metalloaminopeptidase activity	0.583891	Npepl1, Rnpepl1, Metap1, Metap1d, Pepd
107	Cystathionine beta-synthase, core	0.576343	Clcn4, Clcn1, Impdh1, Clcn6
108	G protein gamma	0.576141	Rgs9, Gng14, Gng5, Rgs6
109	Programmed cell death	0.564377	Ppif, Gsdmc4, Ripk3, Spata2, Pdcd2, Pgam5, Htra2, Ninj1, Rnf130
110	Tudor	0.563845	Phf1, Tdrd3, Tdrd7, Arid4b, Arid4a
111	Positive regulation of double-strand break repair via homologous recombination	0.561251	Morf4l1, Ruvbl2, Hdgfl2, Pias4, Dmap1, Mms19, Fus, Mrgbp, Fancb
112	Isopropylmalate dehydrogenase-like	0.559512	Idh2, Idh3g, Idh3b
113	Metal ion transport	0.548682	Trpm6, Ndfip2, Slc39a13, Slc39a11, Slc39a3, Slc39a5, Atp1b3
114	Nucleotide binding	0.547461	Nudt16, Rab11a, Atad3a, Irak2, Speg, Dhx33, Eif4a2, Bmpr1a, Arl2, Map4k2, Grk6, Naxe, Srprb, Ddx55, Chd2, Carns1, Rab29, Limk2, Fars2, Cdk9, Polr2d, Rps6kl1, Mtif2, Phkg2, Ppip5k1, Map2k2, Dync1li1, Dapk3, Mvk, Uckl1, Rbks, Ube2n, Dhx34, Erbb2, Araf, Stk38, Clcn6, Vdac2, Gtpbp2, Rabl6, Adcy2, Cdk5, Nubp1, Ak5, Rab5b, Obscn, Entpd2, Ulk3, Bckdk, Mat1a, Cdk10, Entpd6, Nkiras2, Slc22a21, Rab28, Atp1…
115	Histone lysine methylation	0.542093	Setd6, N6amt1, Kmt5c, Smyd3, Smyd5, Trmt112, Ehmt2
116	Protein-cysteine S-palmitoyltransferase activity	0.541195	Zdhhc4, Zdhhc1, Zdhhc16, Ykt6, Zdhhc8, Zdhhc12
117	Regulation of ARF protein signal transduction	0.533543	Git1, Arfgef3, Cyth2, Fbxo8, Psd2
118	Exonuclease activity	0.532616	Eri3, Dxo, Exo5, Dis3l2, Cnot8, Polg, Isg20l2, Trir, Pnpt1, Rexo1,
119	Translational elongation	0.531011	Eef1g, Rplp1, Tufm, Eef1b2, Rplp2, Rplp1rt, mt-Ts1, Gtpbp2, Tsfm
120	Exon-exon junction complex	0.530087	Pnn, Ccdc9, Tdrd3, Rbm8a, Upf3a, Upf3b, R3hcc1l, Upf2,
121	Acyl-CoA hydrolase activity	0.528453	Acot2, Acaa2, Acot13, Abcd2, Acot8
122	WW domain	0.526852	Arhgap39, Cmtr1, Pcif1, Apbb1, Gas7, Smurf2, Apbb2, Wbp4, Hecw1
123	EF-Hand 1, calcium-binding site	0.518669	Letm1, Calm2, S100a4, Rcn2, Myl9, Sdf4, Fkbp9, S100a6, Ehd1, Kcnip2, 1700109H08Rik, Rhot2, Cabp4, Smoc2, Pdcd6, Pls3, Rasgrp2, Cib1, S100a16, Rcn3, Cetn2, Mcc,
124	Small GTPase mediated signal transduction	0.518627	Ccdc88a, Rapgef4, Ccdc88c, Ywhaq, Ralbp1, Rabif, Dnaja3, Rhot2, Ralgds, Cdc42se1, Rgl2, Gdi1, Rasgrp2, Rasgrp4,
125	Carboxylic acid metabolic process	0.508341	Gadl1, Gad1, Sgpl1, Mif, Mdh1
126	Positive regulation of double-strand break repair	0.506322	Smarce1, Dpf1, Smarcd3, Ube2n, Bcl7b, Bcl7c, Ube2v2, Ddx11, Zcwpw1,
127	Fatty-acyl-CoA binding	0.499711	Acadvl, Dbi, Acadm, Hmgcl, Acad9, Acbd3, Acbd6,
128	Vacuolar proton-transporting V-type ATPase complex	0.493739	Atp6v1f, Ccdc115, Atp6v0b, Atp6v1g1, Atp6ap2
129	Transcription export complex	0.48387	Ddx39b, Sarnp, Thoc2, Thoc1, Chtop
130	Glycogen metabolic process	0.477659	Slc37a4, Akt2, Akt1, Nhlrc1, Phkg2, Pygm, Ppp1cc
131	Zinc finger, CCHC-type	0.46455	Zcchc9, Cnbp, Gm14226, Srsf7, Rbm4b, Srek1ip1
132	Exonuclease	0.464432	Eri3, Dxo, Exo5, Dis3l2, Cnot8, Isg20l2, Trir, Pnpt1, Rexo1,
133	ATPase activity, coupled to transmembrane movement of substances	0.462269	Abcc2, Ralbp1, Abcd2, Atp6v1g1, Abca6, Abcd4, Abcb9, Abcc10,
134	PWWP	0.459602	Pwwp2a, Hdgfl2, Brpf1, Pwwp3a, Zxwpw1
135	Nucleoside diphosphate catabolic process	0.458399	Entpd6, Entpd2, Entpd3
136	Cyclin-dependent protein kinase holoenzyme complex	0.449068	Cnppd1, Ccnl2, Cdk10, Cdk5, Ccnl1, Ccnq, Cdk11b
137	Cell projection organization	0.443131	Ccdc88a, Trappc14, Ift20, Cibar2, Ofd1, Txndc15, Akt1, Dnaaf5, Nubp1, Unc119b, Cep19, Entr1, Mks1, Cluap1, Cimap3, Bbs2, Hyls1, Cfl1, Fuz, Cdk10, Ehd1, Spag17, Wrap73, Tchp, Dzip1, Cep43, Ccdc61, Wtip
138	Fatty acid biosynthetic process	0.440764	Ndufab1, Haxd3, Degs1, Ptgds, Hacd2, Mcat, Elovl7, Ptges2
139	Non-canonical Wnt signaling pathway	0.423648	Dvl2, Ccdc88c, Fzd7, Fzd10, Vangl2, Wnt5a
140	Peroxiredoxin activity	0.421045	Prdx1, Prdx4, Prdx5
141	Band 7 protein	0.420102	Erlin1, Flot2, Phb1
142	Tetraspanin/Peripherin	0.418913	Tspan13, Tspan32, Tspan31, Cd151, Rom1, Tspan17
143	Synaptic vesicle exocytosis	0.418186	Unc13a, Snapin, Stx4a, Doc2a, Vamp2
144	Serine/threonine specific protein phosphatases	0.415362	Ppp5c, Ppp4c, Ppp1cc
145	LisH dimerisation motif	0.412733	Ssbp4, Tcof1, Cep43, Rmnd5b, Ofd1
146	Positive regulation of catalytic activity	0.411342	Slc37a4, Psenen, Aph1c, Stx4a, Psen2, Cib1, B3gat3, Bcl2, Npm2,
147	FERM/acyl-CoA-binding protein, 3-helical bundle	0.399716	Frmpd1, Krit1, Plekhh1, Dbi, Frmd8, Frmd7, Farp2, Tln2, Acbd3, Acbd6
148	Type I interferon signaling pathway	0.396411	Irf3, Ifitm1, Ifitm2, Irak1, Hdac4, Ifnar2
149	Flavoprotein pyridine nucleotide cytochrome reductase	0.391995	Cyb5r3, Ndor1, Cyb5r1, Nanos2
150	Long-chain fatty acid transporter activity	0.388809	Slc27a1, Fabp1, Abcd2, Abcd4, Slc27a3, Slc27a2
151	Negative regulation of axon extension involved in axon guidance	0.388685	Sema4f, Sema4g, Sema3d, Sema4b, Sema3gm Wnt5a
152	Kelch repeat	0.388211	Hcfc2, Megf8, Klhdc9, Klhl26, Ivns1abp, Klhdc8b, Klhdc1, Klhl33, Kbtbd13, Klhdc3, Kbtbd3, Dnah17,
153	C2H2-type 1	0.380847	Zfp661, Klf2, Zfp511, Zfp932, A930039A15Rik, Zbtb6, Zbtb8a, Dnajc21, Zfp553, Zbtb44, Zfp335, Zfp628, Klf9, Zfp219, Zfp280c, Zfp329, Zkscan14, Zbtb49, Patz1, Zfp639, Zfp184, E4f1, Zfp319, Zfp740, Zfp90, Fiz1, Zfp692, Zfp821, Zfp787, Gtf3a, Hinfp, Zfp414, Zfp653, Zfp580, Zkscan6
154	Apoptosis regulator, Bcl-2, BH2 motif, conserved site	0.369596	Bcl2l2, Bax, Bcl2
155	Translation elongation/initiation factor/Ribosomal, beta-barrel	0.365814	Rol35a, Eif5b, Tufm, Mtif2, Aars2, Rpl3, Gtpbp2
156	Protein glycosylation	0.365681	Dpm1, Alg8, Alg3, Ostc, B4galt2, Lmf1, B3galt1, Dad1, Dpm3, B3gat3, Alg1,
157	Regulation of neurogenesis	0.360136	Hes6, Hes7, Hes3, Zfp335
158	Glutathione transferase activity	0.350655	Gstp1, Lancl1, Gstp2, Gstt2, Gstk1, Mgst2
159	Swr1 complex	0.345403	Ruvbl2, Actr6, Dmap1, Znhit1
160	NAD(P)+ nucleosidase activity	0.340407	Sarm1, Bst1, Il18r1, Il1rl2
161	Beta-Alanine metabolism	0.330065	Gadl1, Carns1, Gad1, Aldh9a1, Echs1, Aldh7a1
162	Phospholipid/glycerol acyltransferase	0.323115	Tmem68, Agpat1, Tafazzin, Gpat2
163	Clathrin-dependent endocytosis	0.320345	Ctltb, Ap2s1, Snap91, Clta
164	Cellular response to interleukin-1	0.319753	Pycard, Cfl1, Cactin, Klf2, Xcl1, Ccl6, Dab2ip, Mapk2k7, Ccl19, Rela, Ccl1, Adamts12, CCcl2
165	Protein tag	0.317947	Fau, Sumo1, Urm1, Rps27a
166	Ubiquitin interacting motif	0.316843	Uimc1, Psmd4, Atxn3, Mnat1
167	LIM zinc-binding	0.31246	Trip6, Lmo4, Crip1, Csrp1, Pdlim3, Fhl4, Limk2, Lhx1, Limd1,
168	RNA polymerase II transcription factor complex	0.311039	Atf5, Max, Deaf1, Cebpa, Lmo4, Crebzf, Ldb1, Jund, Atf2, Nfe2l3, Nr1h2, Hmga1, Jdp2, Drap1, Rfxank, Rxrb, Adnp,
169	Double-stranded RNA binding	0.307868	Eif4a1, Tarbp2, Dus2, Prkra, Dhx30, Mtdh, Mrpl44, Yrdc, Dhx33,
170	Phosphatidylinositol-3-phosphatase activity	0.307576	Sbf1, Mtmr12, Mtmr10
171	Polyketide synthase, enoylreductase	0.307214	Cryz, Cryzl1, Ptgr1
172	Mitophagy	0.306674	Atg5, Wdr45, Fis1, Atg2a, Ulk3, Cdkn2a, Pink1
173	ARID/BRIGHT DNA-binding domain	0.304816	Kdm5a, Arid4b, Arid4a
174	Multivesicular body	0.297994	Rab11a, Chmp5, Chmp1a, Tpt1, Cst3
175	Actin-related protein	0.295924	Actr1b, Actr6, Actr5, Acta2
176	Basal cell carcinoma	0.289158	Polk, Dvl2, Fzd7, Fzd10, Dvl1, Fzd6, Axin2, Bax, Wnt5a, Smo,
177	Hydro-lyase activity	0.283383	Fahd2a, Car12, Naxd, Car15, Car3
178	HIF-1 signaling pathway	0.280845	Akt2, Rps6, Egf, Erbb2, Pfkl, Rps6kb2, Akt1, Rela, Elob, Vhl, Map2k2, Egln3, Bcl2,
179	Ras-associating	0.279822	Frmpd1, Snx17, Radil, Rgl2, Dgkq, Ralgds
180	HEAT 1	0.272271	Dnaaf5, Copg2, Ulk4, Ipo4, Sf3b1, Brat1, Scyl1, Mms19,
181	Tumor necrosis factor-mediated signaling pathway	0.267544	Pycard, Rela, Tnfsf18, Ikbkb, Tradd, Traf2
182	Rhythmic process	0.26455	Klf9, Mettl3, U2af1l4, Csnk1d, Hes7, Prmt5, Kdm5a, Hdac3, Tardbp, Rack1, Drd4, Ppp1cc, Crtc1, Hdac1, Bmal2, Cdk5, Siah2, Ccar2, Prok2, Kdm8,
183	Myb-like	0.261922	Tada2a, Dnajc2, Snapc4, Dmtf1, Tada2b, Msantd2
184	Chromo domain-like	0.254972	Morf4l1, Chd2, Arid4b, Arid4a, Mphosph8
185	Zinc finger, PHD-type, conserved site	0.254737	Phf1, Ing5, Kdm5a, Taf3, Brpf1, Fbxl19, Jade1, Mllt10,
186	Sodium:potassium-exchanging ATPase complex	0.254366	Fxyd2, Atp1a2, Atp1b3
187	Regulation of DNA replication	0.252326	Ing5, Ccdc88a, Ruvbl2, Mcrs1, Esco1, Actr5, Ehmt2, Jade1
188	Regulation of potassium ion transmembrane transport	0.246689	Kcnh2, Kcne5, , Gnb2, Kcnip2
189	Negative regulation of signal transduction	0.24505	Socs2, Rgs9, Mfhas1, Rgs6, Socs6, Ddit4l, Rgs5
190	Sphingolipid metabolic process	0.244002	Sgms1, Ceres5, Spns2, Sgpl1, B4galnt1
191	Negative regulation by host of viral release from host cell	0.242678	Trim11, Trim15, Trim5, Trim25
192	ATPase activity, coupled to transmembrane movement of substances	0.241446	Abcc2, Ralbp1, Abcd2, Atp6v1g1, Abca6, Abcd4, Abcb9, Abcc10,
193	Myosin phosphatase activity	0.241405	Ctdp1, Rpap2, Ppp5c, Ssh3, Dusp13b, Ctdsp1, Ptpmt1, Ctdnep1, Ppm1m, Pgam5, Ppp4c, Ppp1cc,
194	Sarcoplasmic reticulum	0.241181	Ryr2, Ryr3, Akt2, Tmem109, Dmpk, Nol3, Mtmr12, Pygm, Zfas1, Casq2,
195	AGC-kinase C-terminal	0.236902	Akt2, Akt1, Dmpk, Pkn1, Grk6, Stk38, Rps6kb2,
196	Prostaglandin metabolic process	0.227828	Gstp1, Ces2f, Gstp2, Ptgds, Ptgr1, Ptges2
197	Cation-transporting ATPase activity	0.226942	Atp1a2, Atp2b1, Atp13a1
198	Beta-Alanine metabolism	0.22519	Gadl1, Carns1, Gad1, Aldh9a1, Echs1, Aldh7a1
199	Sugar transporter, conserved site	0.217543	lc2a8, Slc22a5, Slc2a6, Slc22a21, Mfsd14a
200	TRAF-like	0.216569	Traf4, Spopl, Siah1a, Siah2, Traf2
201	Rab-GAP TBC	0.211564	Evi5l, Tbc1d19, Tbc1d17, Tbc1d10c, Tbc1d22a
202	S-farnesyl cysteine	0.207388	Nap1l1, Palm3, Rasl10a, Ppp1r16a, Ptp4a2, Ykt6, Cln3, Pex19, Rab28,
203	RUN	0.196874	Plekhm2, Snx29, Rundc1
204	DnaJ domain, conserved site	0.196421	Dnajc21, Dnajc2, Dnajb6, Dnaja3
205	Apelin signaling pathway	0.195078	Hdac5, Adcy8, Rps6kb2, Ryr2, Mylk4, Gng14, Gng5, Akt1, Adcy2, Adcy7, Acta2, Map2k2,
206	Sterile alpha motif domain	0.194673	Caskin1, Sgms1, Ppfibp2, Lrsam1, Sarm1, Ephb6, Samd5, Ddhd2, Bfar,
207	Flavin adenine dinucleotide binding	0.194638	Acadvl, Cyb5r3, Ndor1, Acadm, Dus2, Acad9, Mthfr, Txnrd1, Gfer, Dus3l,
208	Ubiquitin conjugating enzyme activity	0.193737	Ube2q1, Ube2d2a, Ube2n, Ube2g2
209	Armadillo	0.188691	Armc5, Armcx3, Unc45b, Zer1
210	Positive regulation of gene silencing by miRNA	0.181902	Trim71, Limd1, Wtip
211	Adrenergic signaling in cardiomyocytes	0.180726	Tpm1, Calm2, Akt2, Fxyd2, Tpm2, Rapgef4, Atp1a2, Ppp2r2a, Atf2, Cacng7, Ppp2r2d, Adcy8, Ppp1cc, Ryr2, Ppp2r5a, Akt1, Adcy2, Adcy7, Atp2b1, Bcl2, Atp1b3,
212	cDENN	0.180523	Sbf1, Dennd10, Dennd6b
213	cAMP biosynthetic process	0.179938	Adcy2, Adcy7, Adcy8
214	Caspase Recruitment	0.175166	Pycard, Card19, Nol3, Cradd
215	Ankyrin repeat	0.171584	Caskin1, Ankrd12, Agap3, Cdkn2a, Ankrd37, Ppp1r16a, Rfxank, Gpank1, Uaca, Ehmt2, Git1, Ankrd11, Nfkbib, Ankrd34a, Trp53bp2, Ankra2, Clip4, Mphosph8, Fem1a, Krit1, Ppp1r12c, Ankrd10, Acbd6, Asap3, Nfkbid,
216	NUDIX hydrolase domain-like	0.168513	Nudt16, Nudt1, Nudt16l1, Mrpl46, Nudt13
217	Phosphotyrosine interaction domain	0.167851	Apbb1, Ldlrap1, Itgb1bp1, Apbb2, Ccm2
218	Oxidoreductase activity, acting on the aldehyde or oxo group of donors, NAD or NADP as acceptor	0.162758	Aldh9a1, Aldh7a1, Aldh16a1
219	BRCT	0.156141	Ctdp1, Xrcc1, Pes1
220	Protein serine/threonine kinase activity	0.155225	Map3k11, Akt2, Irak1, Tssk5, Ripk3, Clk2, Araf, Stk38, Clk4, Irak2, Speg, Csnk1g2, Bmpr1a, Akt1, Cdk5, Dmpk, Trpm6, Obscn, Map4k2, Bckdk, Ulk3, Grk6, Ikbkb, Cdk11b, Map3k21, Wnk2, Cdk10, Pkn1, Ulk4, Csnk1d, Stk25, Nrbp1, Limk2, Cdk9, Pink1, Rps6kb2, Rps6kl1, Mylk4, Fastk, Acvr2b, Phkg2, Map3k15, Trp53rka, Map2k2, Tesk2, Ttbk1, Dapk3,
221	Thrombospondin, type 1 repeat	0.155044	Adamts20, Adamts12, Adamts17, Adamtsl4, Papln
222	Ion transport	0.151821	Atp6v0b, Slc9b1, Calhm1, Cacng7, mt-Atp8, Tpcn2, Slc26a6, Ryr2, Selenok, Ttyh3, Clca2, Atp2b1, Slc39a5, Commd9, Slc5a6, Clcn1, Tmem109, Fxyd2, Atp1a2, Slc25a28, Kcnip2, Grik5, Tomm40l, Atox1, Mfsd5, Tmco3, Slc30a5, Atp6v1g1, Slc22a5, Slc4a11, Tmem175, Mcoln2, Tmc6, Calhm2, Kcnk3, Tspo, Clcn6, Vdac2, Slc10a1, Slc39a11, Fxyd5, Slc39a3, Atp5f1e, Slc12a5, Atp5me, Trpm6, Nherf4, Atp5mg, Atp6v1f, Lrrc8…
223	Phosphatidylinositol binding	0.150668	Tom1, Ccdc88a, Snx17, Snx21, Snx5, Snx32, Snx4, Pitpnm1, Gga1, Snx29, Gga3,
224	Death domain	0.148896	Irak1, Thoc1, Irak2, Cradd, Tradd
225	CS-like domain	0.145984	HAcd3, Ptges3l, Shq1
226	Fibrinogen C-terminal	0.142977	Angptl1, Cntnap1, Angptl6, Mfap4
227	DNA-directed DNA polymerase activity	0.137484	Polk, Polg, Polb
228	Wnt signaling pathway	0.130522	Tle5, Ccdc88a, 2210016L21Rik, Csnk1g2, Wnt5a, Dvl2, Pias4, Fzd7, Zranb1, Grk6, Amer1, Ccar2, Bcl7b, Ccdc88c, Csnk1d, Fzd10, Ldb1, Paf1, Fzd6, Ror2, Znrf3, Axin2, Amer2, Dvl1, Lzts2,
229	REPEAT:2-1	0.129966	Hnrnph1, Rpl14, Dpt
230	Kinetochore	0.127098	Smarce1, Dctn2, Psen2, Itgb3bp, Ppp1cc, Hsf1, Cenps, Chmp5, Chmp1a, Anapc16, Zfp692, Cenpt, Gpatch11, Dync1li1,
231	Cell division	0.123333	Lrrcc1, Anapc4, Dynlt1b, Itgb3bp, Llgl2, Nrde2, Ppp1cc, Usp16, Jtb, Ube2i, Cdk5, Anapc16, Klhdc8b, Anapc15, Entr1, Mau2, Rps3, Abraxas2, Ctdp1, Anapc7, Dis3l2, Sac3d1, Mplkip, Septin1, Clta, Ppp2r2d, Txnl4a, Txnl4a, E4f1, Rae1, Cenps, Chmp1a, Mis18a, Zfp830, Tsg101, Cenpt, Lzts2, Cib1, Cetn2, Katnb1, Babam1, Dync1li1, Eml3,
232	Extracellular matrix structural constituent conferring tensile strength	0.117772	Col27a1, Col6a5, Col16a1
233	Integral component of membrane	0.116289	Slc25a33, Apmap, Pigf, Rnf167, Mettl25b, Impg2, Ifitm2, Stx8, Has3, Prokr2, Lpar1, Slc2a8, Mtch1, Tmem222, Vangl2, Surf1, Bcl7c, 1500011B03Rik, Tmem175, Zfyve27, Orai2, Sft2d2, Mfsd14a, Erbb2, Ier3, Rab5if, Cox7a2l, mt-Nd4l, mt-Nd4l, Jakmip1, Hmgcll1, Stx4a, Scarf2, Cox6c, Armc10, Entpd6, Cox14, Cers5, Ptprv, Dad1, Slc22a21, Slc39a13, Fzd6, Rps23rg1, Bambi, Chtop, Ufm1, Tmem161a, Atp10a, Pigm, Pi…
234	PDZ	0.115497	Frmpd1, Radil, Pdzd4, Pick1, Limk2, Htra2, Lnx1, Gipc1, Dvl2, Synpo2l, Pdzd7, Dvl1, Pdzd9, Pdlim3, Nherf4,
235	Calcium ion transmembrane transport	0.111377	Mcoln2, Ryr2, Ryr3, Slc25a25, Trpm6, Calhm1, Cacng7, Mcoln1, Tspoap1, Atp2b1, Tpcn2,
236	Dynein light intermediate chain binding	0.110242	Ccdc88a, Ccdc88c, Hook2, Dnah2, Dnah17
237	E-box binding	0.110087	Bmal2, Max, Bmyc, Tfap4, Prmt5, Srebf2, Hes3, Hdac1
238	Diacylglycerol/phorbol-ester binding	0.108824	Ubc13a, Dgkq, Araf, Rasgrp4
239	RNA polymerase II transcription factor activity, ligand-activated sequence-specific DNA binding	0.107023	Nr2f6, Srebf1, Rxrb, Nr1i3, Nr2f1, Nr1h2
240	Phosphatidylinositol phosphorylation	0.103662	Socs2, RIp6k1, Socs6, Tmem150a, Pi4k2a, Sla2
241	Carboxylesterase type B, active site	0.102269	Ces2f, Ces1d, Bche
242	Pyruvate metabolism	0.101884	Akr1a1, Aldh9a1, Aldh7a1, Acyp1, Glo1, Mdh1
243	Microtubule-based movement	0.100138	Ktn1, Kif3c, Klc3, Dynlt2b, Dynlt1b, Klc4, Dnah2, Dnah17, Klc2, Dync1li1
244	Hydrolase activity, acting on glycosyl bonds	0.0968686	Pgghg, Mn2c1, Ogg1, Smpd1, Macrod1, Hexd, Mogs, Neu1
245	BTB	0.0922409	Slx4, Zbtb22, Kctd5, Ivns1abp, Spopl, Btbd1, A930039A15Rik, Zbtb6, Kbtbd3, Zbtb49, Patz1, Kctd6, Zbtb8a, Kctd11, Armc5, Zbtb44, Klhl26, Zbtb16, Klhl33, Kbtbd13, Kctd2, Kctd13, Rcbtb1,
246	Chloride transport	0.0863384	Clnc4, Ano7, Slc12a5, Clcn1, Clns1a, Clic3, Ttyh3, Tspo, Clca2, Clcn6, Slc26a6
247	Negative regulation of peptidase activity	0.0861168	Cstb, Pi15, Pebp1, Simc1, Spint2, Wfikkn1, Papln, Cst3
248	GPCR, family 2-like	0.083089	Adgrl3, Adgrf3, Fzd7, Fzd10, Pth1r, Fzd6, Smo
249	GABAergic synapse	0.0778453	Slc6a1, Slc12a5, Gng14, Gng5, Adcy2, Gad1, Gnb2, Adcy7, Plcl1, Adcy8
250	K Homology domain	0.0762968	Pno1, Pcbp4, Mex3d, Pnpt1
251	Pleckstrin homology-like domain	0.0640615	Ranbp3, Akt2, Frmpd1, Adap1, Sbf1, Plekha4, Plekhh1, Cyth2, Ccm2, Dab2ip, Agap3, Dok2, Psd2, Arhgap9, Gtf2h1, Arhgef25, Akt1, Clns1a, Apbb1, Ldlrap1, Obscn, Stap2, Tln2, Mtmr12, Farp2, Plekhj1, Necap1, Vps36, Mtmr10, Plcl1, Arhgef26, Carmil2, Gramd4, Snx17, Phldb3, Apbb2, Ranbp3l, Sharpin, Ngef, Plekhm2, Krit1, Frmd8, Frmd7, Sh2b1, Asap3,
252	Extracellular matrix organization	0.0635496	Eln, Vit, Dnajb6, Adamts17, Prdx4, Apbb2, Papln, Smoc2, Mmp11, Adamts20, Impg2, Apbb1, Col27a1, Col6a5, Adamts12, Col16a1, Crispld2, Vhl, Adamtsl4, Ercc2,
253	C2 calcium-dependent membrane targeting	0.0610547	Unc13a, Cc2d1b, Pkn1, Sytl1, Dab2ip, Tc2n, Tollip, Hecw1, Smurf2, Doc2a, Plcl1, Mctp2, Rab11fip1,
254	GTPase activity	0.0599161	Rab24, Rab11a, Eif5b, Rasl10a, Arf1, Srpra, Gnb2, Agap3, Rhot2, Sar1b, Gtpbp2, Gnl1, Arl2, Tufm, Rab5b, Rem1, Adss1, Rrad, Nkiras2, Arl16, Mras, Septin1, Rab29, Irgc, Rab28, Gtpbp4, Dnajc27, Mtif2, Arfrp1, Rab2a, Tbcc,
255	UBA-like	0.0587693	Cuedc1, Tdrd3, Npm3, Ubald1, Ubqln4, Tollip, Tsfm,
256	PDZ 1	0.058521	Pdzd7, Nherf4, Lnx1
257	EGF-like, laminin	0.054211	Lama1, Megf8, Ntn5, Pear1, Scarf2
258	SCF ubiquitin ligase complex	0.0516484	Fbxo44, Fbxo33, Fbxl6, Siah1a, Pnkp, Fbxl19, Fbxo31
259	Src homology-3 domain	0.0514746	Map3k11, Caskin1, Noxa1, Gas7, Trp53bp2, Prmt2, Sh3gl1, Sla2, Ngef, Arhgap9, Srms, Grap2, Obscn, Ptk6, Tspoap1, Sh3tc1, Map3k21, Stac2, Arhgef26, Fchsd1,
260	Embryonic skeletal system morphogenesis	0.0513236	Megf8, Fuz, Prrx2, Hoxb4, Mdfi, Hoxb2, Pcgf2, Hoxa7
261	Cyclic nucleotide-binding	0.050888	Knch2, Rapgef4, Pnpla7
262	Monooxygenase activity	0.0505271	Cyp27a1, Cyp4f18, Cyp26a1, Cyp4x1, Ywhaq, Cyp4f13, Coq7
263	Myosin II complex	0.0502793	Myl9, Myl6, Myl6b
264	Dilated cardiomyopathy	0.0467671	Lama1, Ryr2, Tpm1, Adcy2, Emd, Tpm2, Itga10, Adcy7, Cacng7, Adcy8
265	Voltage-gated potassium channel complex	0.0457828	Calm2, Kcnh2, Kcne5, Sumo1, Kcnip2, Kcnmb1
266	Metallocarboxypeptidase activity	0.0455248	Agbl5, Agbl2, Vash1
267	SOCS protein, C-terminal	0.0405767	Socs2, Socs6, Neurl2
268	Potassium ion import across plasma membrane	0.0396763	Kcnh2, Slc12a5, Atp1a2, Slc12a9, Atp1b3
269	Cytokine-mediated signaling pathway	0.0372066	Irf5,, Crlf2, Rela, Cebpa, Irak1, Ccl2, Ghr, Irak2, Ifnar2, Il1rl2, Zc3h15, Il11ra1
270	REPEAT:1	0.0337724	Ryr3, Lmod1, Srsf7, Sncg, Rpl7, Ewsr1, Plin4, Rpl29, Ryr2, Tcof1, Ss18, Brf1, Coq7, Flvcr2, Zfp628,
271	Leucine-rich repeat	0.0298284	Lrrc61, Ogn, Lrrcc1, Lrrc75b, Lrrc18, Lgi4, Nlrx1, Anp32a, Carmil2, Lrrc23, Lrrc8a, Gp9, Lrsam1, Stk11ip, Gm20605, Nwd2, Aspn, Fbxl6, Lrrc40, Lrrc42, Mfhas1, Rnh1, Fam89b, Zer1, Fbxl19, Tpbgl, Lrrc28,
272	Bromodomain	0.0278834	Brdt, Brpf1, Brd9
273	Dbl homology (DH) domain	0.0267072	Arhgef25, Obscn, Farp2, Arhgef26, Ngef
274	Innate immune response	0.0241701	Polr3g, Mettl3, Irak1, Dab2ip, Ighv1-62-2, Il27, Srms, Cnpy3, Polr3d, Ifitm2, Cyba, Map4k2, Arg1, Cd160, Ppp1r14b, Trim17, Marco, Trbc2, Trim5, Polr3h, Rnf187, Trbc1, Trim11, Iglc2, Ighv1-69, Rarres2, Igha, Cr1l, Irf5, Mcoln2, Ifitm1, Irf3, Cactin, Polr3e, Ecsit, Ifi35, Tnfaip8l2, Sarm1, Il17ra, Akap8, Tollip, Traf2, Trim25, Ttc4, Traf4, Rnf166, Usp27x, Rela, Ighv1-4, Ighv1-20, Lyar, Ighv15-2, Ma…
275	Sodium ion transport	0.0185897	Commd9, Slc5a6, Slc9b1, Commd3, Fxyd2, Atp1a2, Slc22a5, Slc4a11, Slc10a1, Atp1b3
276	Ion transmembrane transport	0.0179827	Atp6v1f, Ryr2, Chrne, Kcnk3, Clca2, Htr2b, Grik5
277	Proteolysis	0.0179737	F8, Mipep, Hint1, Adamts20, Dnpep, Mindy4, H13, Adamts12, Clca2, Psmb5, Pdzd4, Agbl2, Atxn3, Htra2, Asrgl1, Mmp11, Npepl1, Bap1, Capn15, Usp21, Mcpt4, Rnpepl1, Tysnd1, Vash1, Usp16, Usp27x, Otub1, Klk1b11, Parl, Zranb1, Usp3, Agbl5, Adamts17, Psen2, Metap1, Metap1d, Clpp, Usp20, Pepd, Lonp2, Sec11c, Otud6b, Sec11a, Ctsw, Usp36, Scrn2, Klk8, Asprv1, Kdm8, Mindy1,
278	von Willebrand factor, type A	0.015407	Ints6l, Col6a5, Vit, Itga10, Psmd4, Clca2
279	Actin filament binding	0.0139775	Tpm1, Cfl1, Arpc3, Tpm2, Gas7, Frg1, Tagln, Vil1, Map1s, Vps16, Mtss1, Pick1, Flnc, Gjb6, Pls3, Bloc1s6, Tln2, Kbtbd13, Nexn, Arpc4, Adss1,
280	High mobility group (HMG) box domain	0.0102278	Smarce1, Sox13, Hmg20b
281	Peptidyl-tyrosine phosphorylation	0.0090892	Egf, Erbb2, Clk2, Clk4, Map2k2, Ttbk1, Srms
282	Bicellular tight junction assembly	0.00797452	Cldn34b2, Arl2, Ocln, Ocel1, Cldn7
283	C-type lectin	0.00602549	Cleci, Cd209c, Klra5, Sele, Cd207, Klrb1c, Dgcr2, Clec9a
284	Regulation of ion transmembrane transport	0.00478536	Kcnh2, Cacna1i, Clcn1, Tmem109, Clic3, Calhm1, Kcnq5, Cacng7, Kcnip2, Tpcn2
285	Fibronectin type-III	0.00416207	Crlf2, Mybpc1, Ptprv, Ifnar2, Speg, Hcfc2, Fndc10, Crlf3, Pomgnt2, Obscn, Ghr, Tspoap1, Fndc8, Il11ra1,
286	Immunoglobulin C1-set	0.00369944	Iglc2, Igha, H2-M2, Trbc2, Sirpb1c, H2-Ob, H2-Oa, Trbc1
287	Rho GTPase-activating protein domain	0.00171248	Arhgap39, Ralbp1, Arhgap9
288	Multicellular organism development	0.00130899	Nes, Trim71, 2210016L21Rik, Wtap, Ryr2, Ntn5, Pi15, Prrx2, Dazap1, Piwil4, Tsnax, Fzd10, Ldb1, Vangl2, Sema4f, Sema4b, Cr1l, Mdfi, Cdh8, Ngrn, Unc45a, Tbcb, Erbb2, Edf1, Utp25, Smo, Syna, Npm2, Traf4, Ube2i, Obscn, Mab21l2, Cebpa, Gas7, Chrdl1, Hes7, Ebf2, Fzd6, Ngef, Clptm1, Sema4g, Utp3, Zfp830, Hoxb2, Hoxa7, Gnrh1, Ppdpf, Mctp2, Akt2, Tdrd7, Kdm5a, Tssk5, Dab2ip, Donson, Egfl7, Wnt5a, Ifrd1, T…
289	N-linked (GlcNAc...) asparagine	0.000476126	Tm2d3, Apmap, Tnfrsf18, Hmgcr, Rnf167, Cnpy3, Bmpr1a, Pi15, Cntnap1, Impg2, Adamts12, Has3, Prokr2, Cd160, Pigt, Slc39a5, Lpar1, Jkamp, Lama1, Nrg4, Crtap, Slc2a8, Tspan13, Sema4f, Ccl19, Tmem104, Ccl2, Clec2i, Tmc6, Ptgds, Mfsd14a, Erbb2, Ier3, Clcn6, Cd209c, Adcy2, Emp2, Pomgnt2, Btnl9, Entpd2, Hacd2, Scarf2, Lrrc8a, Ptprv, Cers5, Slc22a21, Fzd6, Casq2, Bambi, Ifnar2, Cers4, Tmem161a, Ctsw, Sem…
290	Ig-like C2-type 3	0.000156945	Bcam, Il18r1, Papln, Il1rl2
291	Immunoglobulin I-set	0.000140354	Ccdc141, Obscn, Mybpc1, Nexn, Bcam, Ror2, Speg, Papln
292	Immunoglobulin mediated immune response	0.000132267	Ighv5-4, Iglc2, Ighv1-69, Ighv1-4, Ighv1-20, Igha, Ighv15-2, Ighv1-62-2
293	Response to stimulus	0.000110617	Rgs9, Calhm1, Ripk3, Hdac5, Rdh12, Rom1, Pink1
294	serine-type peptidase activity	3.04825e-05	Lonp2, Klk1b11, Parl, Klk8, Mcpt4, Tysnd1, Clpp, Htra2,
295	G-protein coupled receptor signaling pathway	9.27628e-06	P2ry2, Tm2d1, Gnb2, Drd4, Htr2b, Smo, Or2t29, Cnr1, Gng14, Or52n4, Ccl1, Rgs6, Gde1, Entpd2, Fzd7, Dgkq, Mrgpra1, Tbxa2r, Gpr15, Prokr2, Lpar1, Adgrl3, Gpr45, Xcl1, Ccl6, Fzd10, Pth1r, Ric8a, Fzd6, Grm4, Inpp5k, Rgs5, Ptger3, Gipc1, Rgs9, Ccl19, Gng5, S1pr4, Ccl2, Ramp1, Lpar6,
296	Immunoglobulin domain	4.01633e-06	Lair1, Sigirr, Milr1, Mybpc1, Speg, Wfikkn1, Obscn, Btnl9, Cd300ld, Cd160, Il18r1, Il1rl2, Thy1, Bcam, Ror2, Papln, Iglc2, Sema4f, Sema4g, Pigr, Sema3d, Sema4b, F11r, Sema3g, Nexn, Il11ra1
297	Extracellular region	1.80811e-14	Eln, S100a4, F8, Ogn, Npff, Tnfrsf18, Il27, Ofd1, Ntn5, Pi15, Impg2, Rln3, Adamts12, Cd160, Naxe, Gatd1, Lama1, Nrg4, Crtap, Cklf, Stard7, Aspn, Mmp11, Iglc2, Ccl19, Rarres2, Col16a1, Ccl2, Ghr, Smpd1, Zfp653, Ngrn, Ninj1, Izumo4, Ifi35, Ptgds, Vash1, Obscn, Crlf2, Cfl1, Sdf2, Entpd6, Ccl6, Vit, Chrdl1, Abhd15, Npc2, Ifnar2, 4931414P19Rik, Spag17, Pigr, Hilpda, C1qtnf2, Gnrh1, Gnptg, Mfap5, Leap2…
