# Supplementary material for: Exploring the Role of Platelets in Virus-Induced Inflammatory Demyelinating Disease and Myocarditis
Source: Int J Mol Sci. 2024 Mar 19;25(6):3460. doi: 10.3390/ijms25063460 (PMC10970283; doi:10.3390/ijms25063460)
Supplement: Supplementary file 1 [file ijms-25-03460-s001.zip › Supplemental Table S3.xlsx]

## Sheet: Radar chart
K-means clustering of spleen transcriptome data
Davis-Bouldin index: The number of clusters was determined by Davis-Bouldin Index.
#	db
3	0.753749
4	0.68824
5	0.660137
6	0.618618
7	0.60219
8	0.577776
9	0.577237
10	0.554382
11	0.557815
12	0.546679
13	0.551997
14	0.531856
15	0.524874
Cluster centers
	Day 4	Day 7	Day 35
1	0.00511018	-0.0756025	-0.297218
2	-0.258589	0.51655	-0.809863
3	-0.775289	0.19745	-0.137646
4	0.302741	-0.699132	-0.128075
5	-0.115563	0.275043	-0.352231
6	0.608099	0.858803	-0.0866275
7	0.00132538	0.311264	-0.0571602
8	-0.46856	-0.227898	-0.713422
9	-0.275226	0.180402	-0.175097
10	0.000136831	-0.0096566	0.0069324
11	0.425493	0.0784225	-0.739302
12	0.451087	0.0262891	0.100905
13	-0.343837	-0.406604	0.0349461
14	-0.264503	0.831289	-0.0320132
15	-0.186503	0.0826045	0.457651

## Sheet: All Cluster
Cluster #	Gene ID	Day4	Day7	Day35	Gene symbol	Gene name
9	ENSMUSG00000000001	-0.258395	0.216485	-0.157455	Gnai3	guanine nucleotide binding protein (G protein), alpha inhibiting 3
10	ENSMUSG00000000003	0	0	0	Pbsn	probasin
7	ENSMUSG00000000028	0.277267	0.224375	-0.0947711	Cdc45	cell division cycle 45
4	ENSMUSG00000000031	0.181378	-0.550978	-0.0304006	H19	H19, imprinted maternally expressed transcript
13	ENSMUSG00000000037	-0.087674	-0.661823	0.11309	Scml2	Scm polycomb group protein like 2
15	ENSMUSG00000000049	-0.262506	0.236984	0.272346	Apoh	apolipoprotein H
10	ENSMUSG00000000056	-0.0650852	-0.0676465	-0.0656566	Narf	nuclear prelamin A recognition factor
9	ENSMUSG00000000058	-0.21061	0.207095	-0.0984171	Cav2	caveolin 2
9	ENSMUSG00000000078	-0.300705	0.196114	-0.214385	Klf6	Kruppel-like transcription factor 6
10	ENSMUSG00000000085	-0.0116997	0.111366	-0.121133	Scmh1	sex comb on midleg homolog 1
5	ENSMUSG00000000088	-0.0614632	0.333436	-0.383211	Cox5a	cytochrome c oxidase subunit 5A
9	ENSMUSG00000000093	-0.354799	0.162271	-0.0964303	Tbx2	T-box 2
7	ENSMUSG00000000094	0	0.283008	0	Tbx4	T-box 4
10	ENSMUSG00000000103	0	0	0	Zfy2	zinc finger protein 2, Y-linked
5	ENSMUSG00000000120	-0.0220961	0.18647	-0.375831	Ngfr	nerve growth factor receptor (TNFR superfamily, member 16)
11	ENSMUSG00000000125	0.803584	-0.161471	-0.350977	Wnt3	wingless-type MMTV integration site family, member 3
7	ENSMUSG00000000126	0.185922	0.464386	0.191872	Wnt9a	wingless-type MMTV integration site family, member 9A
9	ENSMUSG00000000127	-0.338419	-0.00566014	-0.0626078	Fer	fer (fms/fps related) protein kinase
9	ENSMUSG00000000131	-0.175414	0.271584	-0.166396	Xpo6	exportin 6
5	ENSMUSG00000000134	-0.181264	0.346989	-0.234597	Tfe3	transcription factor E3
5	ENSMUSG00000000142	-0.324862	0.19788	-0.531252	Axin2	axin 2
5	ENSMUSG00000000148	-0.0973225	0.357451	-0.257903	Brat1	BRCA1-associated ATM activator 1
9	ENSMUSG00000000149	-0.230937	0.272434	-0.251092	Gna12	guanine nucleotide binding protein, alpha 12
13	ENSMUSG00000000154	-0.411779	-0.211779	0.113408	Slc22a18	solute carrier family 22 (organic cation transporter), member 18
11	ENSMUSG00000000157	0.700618	0.549618	-0.667478	Itgb2l	integrin beta 2-like
13	ENSMUSG00000000159	-0.4	-0.6	0.2	Igsf5	immunoglobulin superfamily, member 5
14	ENSMUSG00000000167	-0.705214	0.708114	-0.191872	Pih1d2	PIH1 domain containing 2
9	ENSMUSG00000000168	-0.306207	0.174289	-0.183427	Dlat	dihydrolipoamide S-acetyltransferase (E2 component of pyruvate dehydrogenase complex)
5	ENSMUSG00000000171	-0.0436127	0.253687	-0.331079	Sdhd	succinate dehydrogenase complex, subunit D, integral membrane protein
13	ENSMUSG00000000182	-0.664386	-0.664386	-0.116992	Fgf23	fibroblast growth factor 23
7	ENSMUSG00000000183	0	0.2	0	Fgf6	fibroblast growth factor 6
9	ENSMUSG00000000184	-0.241485	0.257687	-0.087088	Ccnd2	cyclin D2
5	ENSMUSG00000000194	-0.132738	0.276057	-0.198575	Gpr107	G protein-coupled receptor 107
12	ENSMUSG00000000197	0.6	-0.2	0.0830075	Nalcn	sodium leak channel, non-selective
9	ENSMUSG00000000202	-0.283008	0.116992	0	Btbd17	BTB (POZ) domain containing 17
6	ENSMUSG00000000204	1.24531	1.49439	-0.429073	Slfn4	schlafen 4
10	ENSMUSG00000000214	0	0	0	Th	tyrosine hydroxylase
15	ENSMUSG00000000215	0.2	0.361471	1.07439	Ins2	insulin II
12	ENSMUSG00000000216	0.6	0	0.4	Scnn1g	sodium channel, nonvoltage-gated 1 gamma
12	ENSMUSG00000000223	0.313408	0.0710606	0.349692	Drp2	dystrophin related protein 2
9	ENSMUSG00000000244	-0.257547	0.119534	-0.341872	Tspan32	tetraspanin 32
5	ENSMUSG00000000247	0.0784635	0.483007	-0.483007	Lhx2	LIM homeobox protein 2
9	ENSMUSG00000000248	-0.311561	0.0495621	-0.403174	Clec2g	C-type lectin domain family 2, member g
1	ENSMUSG00000000253	-0.0927852	-0.209343	-0.529605	Gmpr	guanosine monophosphate reductase
10	ENSMUSG00000000263	0	0	0	Glra1	glycine receptor, alpha 1 subunit
9	ENSMUSG00000000266	-0.416864	0.114166	0.0481288	Mid2	midline 2
5	ENSMUSG00000000275	0.10971	0.553514	-0.319692	Trim25	tripartite motif-containing 25
9	ENSMUSG00000000276	-0.358813	-0.0138014	-0.126929	Dgke	diacylglycerol kinase, epsilon
7	ENSMUSG00000000278	-0.168198	0.343836	-0.0105823	Scpep1	serine carboxypeptidase 1
9	ENSMUSG00000000282	-0.271925	0.172277	-0.121526	Mnt	max binding protein
7	ENSMUSG00000000290	-0.0618242	0.349545	-0.126358	Itgb2	integrin beta 2
5	ENSMUSG00000000295	-0.209784	0.390202	-0.33308	Hddc2	HD domain containing 2
14	ENSMUSG00000000296	-0.116992	0.716993	-0.2	Tpd52l1	tumor protein D52-like 1
8	ENSMUSG00000000301	-0.150581	-0.0304006	-0.822957	Pemt	phosphatidylethanolamine N-methyltransferase
5	ENSMUSG00000000303	-0.110089	0.246445	-0.262863	Cdh1	cadherin 1
15	ENSMUSG00000000305	-0.0956699	0.212341	0.544334	Cdh4	cadherin 4
2	ENSMUSG00000000308	-0.244478	0.202299	-0.8	Ckmt1	creatine kinase, mitochondrial 1, ubiquitous
9	ENSMUSG00000000317	-0.369715	0.106517	-0.235711	Bcl6b	B cell CLL/lymphoma 6, member B
5	ENSMUSG00000000318	-0.0089077	0.14637	-0.226073	Clec10a	C-type lectin domain family 10, member A
7	ENSMUSG00000000320	0.148249	0.169087	-0.188717	Alox12	arachidonate 12-lipoxygenase
1	ENSMUSG00000000325	-0.19958	-0.080825	-0.221113	No associated gene
1	ENSMUSG00000000326	-0.0950405	-0.0143306	-0.2656	Comt	catechol-O-methyltransferase
9	ENSMUSG00000000339	-0.336991	0.392867	-0.047963	Rtca	RNA 3'-terminal phosphate cyclase
9	ENSMUSG00000000340	-0.205546	0.319436	-0.0593799	Dbt	dihydrolipoamide branched chain transacylase E2
5	ENSMUSG00000000346	-0.139188	0.202079	-0.232732	Dazap2	DAZ associated protein 2
9	ENSMUSG00000000355	-0.392946	0.185841	-0.316885	Mcts1	malignant T cell amplified sequence 1
5	ENSMUSG00000000359	0.180679	0.265284	-0.503576	Rem1	rad and gem related GTP binding protein 1
3	ENSMUSG00000000365	-0.661581	0.144493	-0.183915	Rnf17	ring finger protein 17
7	ENSMUSG00000000374	-0.131939	0.212652	-0.0762389	Trappc10	trafficking protein particle complex 10
5	ENSMUSG00000000378	-0.209577	0.290274	-0.328975	Ccm2	cerebral cavernous malformation 2
1	ENSMUSG00000000381	0	-0.316993	-0.2	Wap	whey acidic protein
5	ENSMUSG00000000384	-0.0540466	0.214443	-0.297952	Tbrg4	transforming growth factor beta regulated gene 4
6	ENSMUSG00000000385	1.07846	1.04576	-0.116992	Tmprss2	transmembrane protease, serine 2
6	ENSMUSG00000000386	1.88444	1.70131	-0.434897	Mx1	MX dynamin-like GTPase 1
5	ENSMUSG00000000392	-0.103335	0.359827	-0.327971	Fap	fibroblast activation protein
14	ENSMUSG00000000394	-0.747393	0.761471	0.6	Gcg	glucagon
7	ENSMUSG00000000399	-0.0498288	0.245063	-0.194604	Ndufa9	NADH:ubiquinone oxidoreductase subunit A9
3	ENSMUSG00000000402	-1.12777	0.120537	-0.149692	Egfl6	EGF-like-domain, multiple 6
5	ENSMUSG00000000409	-0.196641	0.239731	-0.335017	Lck	lymphocyte protein tyrosine kinase
10	ENSMUSG00000000411	0.181378	-0.264386	0.0526069	Tssk3	testis-specific serine kinase 3
3	ENSMUSG00000000416	-0.542496	0.245169	0.0593851	Cttnbp2	cortactin binding protein 2
9	ENSMUSG00000000420	-0.210988	0.16184	-0.100881	Galnt1	polypeptide N-acetylgalactosaminyltransferase 1
10	ENSMUSG00000000435	0	0	0	Myf5	myogenic factor 5
5	ENSMUSG00000000439	-0.153264	0.259537	-0.360801	Mkrn2	makorin, ring finger protein, 2
6	ENSMUSG00000000440	0.785732	0.634326	0.459317	Pparg	peroxisome proliferator activated receptor gamma
9	ENSMUSG00000000441	-0.219421	0.242881	-0.234626	Raf1	v-raf-leukemia viral oncogene 1
5	ENSMUSG00000000486	-0.130451	0.244131	-0.383167	Septin1	septin 1
1	ENSMUSG00000000489	0.0574424	0.0407501	-0.178586	Pdgfb	platelet derived growth factor, B polypeptide
9	ENSMUSG00000000530	-0.236033	0.187022	-0.301003	Acvrl1	activin A receptor, type II-like 1
9	ENSMUSG00000000531	-0.438914	0.203428	-0.274346	Tamalin	trafficking regulator and scaffold protein tamalin
9	ENSMUSG00000000532	-0.210803	0.119529	-0.278164	Acvr1b	activin A receptor, type 1B
9	ENSMUSG00000000538	-0.357315	0.13433	-0.15739	Tom1l2	target of myb1-like 2 (chicken)
12	ENSMUSG00000000544	0.4	0	0	Gpa33	glycoprotein A33 (transmembrane)
7	ENSMUSG00000000552	0.012657	0.419225	-0.103076	Zfp385a	zinc finger protein 385A
1	ENSMUSG00000000555	-0.00586437	0.0946403	-0.255394	Itga5	integrin alpha 5 (fibronectin receptor alpha)
9	ENSMUSG00000000560	-0.4	0	-0.335614	Gabra2	gamma-aminobutyric acid (GABA) A receptor, subunit alpha 2
9	ENSMUSG00000000561	-0.311256	0.187188	-0.258231	Wdr77	WD repeat domain 77
9	ENSMUSG00000000562	-0.383022	0.274226	-0.236885	Adora3	adenosine A3 receptor
5	ENSMUSG00000000563	-0.119517	0.187786	-0.279411	Atp5pb	ATP synthase peripheral stalk-membrane subunit b
7	ENSMUSG00000000567	-0.234586	0.345907	0.0100663	Sox9	SRY (sex determining region Y)-box 9
5	ENSMUSG00000000568	-0.195374	0.297561	-0.275892	Hnrnpd	heterogeneous nuclear ribonucleoprotein D
5	ENSMUSG00000000579	-0.234991	0.359431	-0.28938	Dynlt1c	dynein light chain Tctex-type 1C
9	ENSMUSG00000000581	-0.242334	0.229678	-0.232667	C1d	C1D nuclear receptor co-repressor
9	ENSMUSG00000000594	-0.250691	0.256889	-0.130297	Gm2a	GM2 ganglioside activator protein
9	ENSMUSG00000000600	-0.344967	0.232805	-0.22577	Krit1	KRIT1, ankyrin repeat containing
9	ENSMUSG00000000605	-0.269487	0.103151	-0.271146	Clcn4	chloride channel, voltage-sensitive 4
10	ENSMUSG00000000606	0	0	0	Vmn2r88	vomeronasal 2, receptor 88
1	ENSMUSG00000000617	-0.114546	0.0235968	-0.180014	Grm6	glutamate receptor, metabotropic 6
8	ENSMUSG00000000627	-0.439503	-0.0138645	-0.575284	Sema4f	sema domain, immunoglobulin domain (Ig), TM domain, and short cytoplasmic domain
7	ENSMUSG00000000628	-0.0149371	0.406469	-0.165847	Hk2	hexokinase 2
9	ENSMUSG00000000631	-0.165296	0.271256	-0.117078	Myo18a	myosin XVIIIA
13	ENSMUSG00000000632	-0.283008	-0.516992	-0.316993	Sez6	seizure related gene 6
5	ENSMUSG00000000673	-0.144305	0.370529	-0.407328	Haao	3-hydroxyanthranilate 3,4-dioxygenase
5	ENSMUSG00000000682	-0.17411	0.355338	-0.283087	Cd52	CD52 antigen
9	ENSMUSG00000000686	-0.376834	0.125572	-0.413616	Abhd15	abhydrolase domain containing 15
11	ENSMUSG00000000690	0.374143	0.194801	-0.389507	Hoxb6	homeobox B6
5	ENSMUSG00000000693	-0.170713	0.0998648	-0.361738	Loxl3	lysyl oxidase-like 3
10	ENSMUSG00000000701	0	0	0	Tcl1b5	T cell leukemia/lymphoma 1B, 5
12	ENSMUSG00000000706	0.90238	-0.113408	0.265209	Btn1a1	butyrophilin, subfamily 1, member A1
9	ENSMUSG00000000708	-0.145273	0.155126	-0.158403	Kat2b	K(lysine) acetyltransferase 2B
9	ENSMUSG00000000711	-0.249344	0.151433	-0.265621	Rab5b	RAB5B, member RAS oncogene family
15	ENSMUSG00000000724	0	0	0.4	Cryba1	crystallin, beta A1
8	ENSMUSG00000000730	-0.0830075	-0.0186219	-1.15627	Dnmt3l	DNA (cytosine-5-)-methyltransferase 3-like
1	ENSMUSG00000000731	0.259924	0.0757765	-0.40647	Aire	autoimmune regulator (autoimmune polyendocrinopathy candidiasis ectodermal dystrophy)
9	ENSMUSG00000000732	-0.255126	0.224446	-0.231437	Icosl	icos ligand
9	ENSMUSG00000000738	-0.18153	0.150287	-0.194869	Spg7	SPG7, paraplegin matrix AAA peptidase subunit
12	ENSMUSG00000000739	0.550978	-0.033985	0	Sult5a1	sulfotransferase family 5A, member 1
5	ENSMUSG00000000740	-0.0998927	0.334529	-0.411454	Rpl13	ribosomal protein L13
5	ENSMUSG00000000743	-0.112919	0.214248	-0.269509	Chmp1a	charged multivesicular body protein 1A
9	ENSMUSG00000000751	-0.219563	0.238054	-0.13362	Rpa1	replication protein A1
7	ENSMUSG00000000753	0.0478017	0.247835	-0.0852613	Serpinf1	serine (or cysteine) peptidase inhibitor, clade F, member 1
9	ENSMUSG00000000759	-0.256064	0.20403	-0.153394	Tubgcp3	tubulin, gamma complex associated protein 3
9	ENSMUSG00000000766	-0.321372	0.132685	-0.0441319	Oprm1	opioid receptor, mu 1
5	ENSMUSG00000000776	-0.118775	0.173569	-0.310548	Polr3d	polymerase (RNA) III (DNA directed) polypeptide D
9	ENSMUSG00000000782	-0.307873	0.218769	-0.257036	Tcf7	transcription factor 7, T cell specific
9	ENSMUSG00000000787	-0.26809	0.241629	-0.16517	Ddx3x	DEAD box helicase 3, X-linked
14	ENSMUSG00000000791	0.126436	0.846021	-0.286581	Il12rb1	interleukin 12 receptor, beta 1
1	ENSMUSG00000000792	0.17325	0.121537	-0.433162	Slc5a5	solute carrier family 5 (sodium iodide symporter), member 5
1	ENSMUSG00000000794	-0.2	-0.2	-0.4	Kcnn3	potassium intermediate/small conductance calcium-activated channel, subfamily N, member 3
10	ENSMUSG00000000804	0.0345633	-0.0317925	0.0139177	Usp32	ubiquitin specific peptidase 32
7	ENSMUSG00000000805	0	0.2	0	Car4	carbonic anhydrase 4
9	ENSMUSG00000000811	-0.37154	0.149573	-0.0606625	Txnrd3	thioredoxin reductase 3
14	ENSMUSG00000000817	-0.247015	0.663011	0.0252071	Fasl	Fas ligand (TNF superfamily, member 6)
9	ENSMUSG00000000823	-0.28435	0.301032	-0.234062	Zfp512b	zinc finger protein 512B
9	ENSMUSG00000000826	-0.238885	0.185686	-0.17631	Dnajc5	DnaJ heat shock protein family (Hsp40) member C5
9	ENSMUSG00000000827	-0.258544	0.144803	-0.217153	Tpd52l2	tumor protein D52-like 2
9	ENSMUSG00000000838	-0.212619	0.307924	-0.142531	Fmr1	fragile X messenger ribonucleoprotein 1
9	ENSMUSG00000000861	-0.221428	0.296318	-0.12138	Bcl11a	B cell CLL/lymphoma 11A (zinc finger protein)
12	ENSMUSG00000000869	0.501559	0.313408	0.0474078	Il4	interleukin 4
1	ENSMUSG00000000876	-0.134935	0.0389043	-0.265503	Pxmp4	peroxisomal membrane protein 4
9	ENSMUSG00000000881	-0.141846	0.179865	-0.0521529	Dlg3	discs large MAGUK scaffold protein 3
5	ENSMUSG00000000884	-0.274833	0.204006	-0.362658	Gnb1l	guanine nucleotide binding protein (G protein), beta polypeptide 1-like
13	ENSMUSG00000000889	-0.2	-0.2	0	Dbh	dopamine beta hydroxylase
9	ENSMUSG00000000901	-0.476633	0.255678	-0.369535	Mmp11	matrix metallopeptidase 11
9	ENSMUSG00000000902	-0.19088	0.122323	-0.185163	Smarcb1	SWI/SNF related, matrix associated, actin dependent regulator of chromatin, subfamily b, member 1
9	ENSMUSG00000000903	-0.462205	0.300365	-0.432545	Vpreb3	V-set pre-B cell surrogate light chain 3
9	ENSMUSG00000000915	-0.3096	0.328872	-0.23141	Hip1r	huntingtin interacting protein 1 related
9	ENSMUSG00000000916	-0.400819	0.0144822	-0.398682	Nsun5	NOL1/NOP2/Sun domain family, member 5
5	ENSMUSG00000000934	-0.0971976	0.0793549	-0.478474	Top1mt	DNA topoisomerase 1, mitochondrial
12	ENSMUSG00000000938	0.4	-0.283008	-0.2	Hoxa10	homeobox A10
5	ENSMUSG00000000942	-0.242113	0.330415	-0.341564	Hoxa4	homeobox A4
12	ENSMUSG00000000948	0.293755	0.364279	0.23057	Gm38393	predicted gene, 38393
9	ENSMUSG00000000957	-0.103342	0.0968644	-0.201418	Mmp14	matrix metallopeptidase 14 (membrane-inserted)
9	ENSMUSG00000000958	-0.0831864	0.147858	-0.159059	Slc7a7	solute carrier family 7 (cationic amino acid transporter, y+ system), member 7
5	ENSMUSG00000000959	-0.0859977	0.225885	-0.297263	Oxa1l	oxidase assembly 1-like
9	ENSMUSG00000000976	-0.33924	0.257881	-0.123867	Heatr6	HEAT repeat containing 6
6	ENSMUSG00000000982	0.781378	0.747393	0.161471	Ccl3	chemokine (C-C motif) ligand 3
15	ENSMUSG00000000983	0	0.2	0.316993	Wfdc18	WAP four-disulfide core domain 18
4	ENSMUSG00000001014	0.158909	-1.14734	0.220392	Icam4	intercellular adhesion molecule 4, Landsteiner-Wiener blood group
5	ENSMUSG00000001016	-0.113207	0.228574	-0.256927	Ilf2	interleukin enhancer binding factor 2
9	ENSMUSG00000001017	-0.293426	0.248319	-0.250538	Chtop	chromatin target of PRMT1
9	ENSMUSG00000001018	-0.284838	0.22596	-0.340686	Snapin	SNAP-associated protein
5	ENSMUSG00000001020	-0.0887904	0.364807	-0.607664	S100a4	S100 calcium binding protein A4
4	ENSMUSG00000001021	0.0830075	-0.516992	-0.166015	S100a3	S100 calcium binding protein A3
12	ENSMUSG00000001023	0.516992	-0.316993	0	S100a5	S100 calcium binding protein A5
5	ENSMUSG00000001025	0.121296	0.293011	-0.471362	S100a6	S100 calcium binding protein A6 (calcyclin)
13	ENSMUSG00000001027	-0.350829	-0.113473	0.06611	Scn4a	sodium channel, voltage-gated, type IV, alpha
9	ENSMUSG00000001029	-0.24211	0.0444615	-0.269655	Icam2	intercellular adhesion molecule 2
7	ENSMUSG00000001034	-0.130072	0.299037	-0.103214	Mapk7	mitogen-activated protein kinase 7
9	ENSMUSG00000001036	-0.231772	0.211369	-0.244272	Epn2	epsin 2
7	ENSMUSG00000001039	-0.0932636	0.479287	-0.0438235	B9d1	B9 protein domain 1
9	ENSMUSG00000001052	-0.245343	0.210342	-0.188439	Sec24b	SEC24 homolog B, COPII coat complex component
5	ENSMUSG00000001053	-0.189157	0.188261	-0.453671	N4bp3	NEDD4 binding protein 3
9	ENSMUSG00000001054	-0.23761	0.219805	-0.258457	Rmnd5b	required for meiotic nuclear division 5 homolog B
5	ENSMUSG00000001056	-0.0265714	0.17454	-0.245676	Nhp2	NHP2 ribonucleoprotein
1	ENSMUSG00000001062	-0.148156	0.0539323	-0.285803	Vps9d1	VPS9 domain containing 1
9	ENSMUSG00000001065	-0.275143	0.270092	-0.233012	Zfp276	zinc finger protein (C2H2 type) 276
1	ENSMUSG00000001076	0	0	-0.2	C1ql4	complement component 1, q subcomponent-like 4
5	ENSMUSG00000001082	-0.0267252	0.288979	-0.312607	Mfsd10	major facilitator superfamily domain containing 10
7	ENSMUSG00000001089	-0.111208	0.306941	0.0118043	Luzp1	leucine zipper protein 1
13	ENSMUSG00000001095	-0.116992	-0.389507	0.0643856	Slc13a2	solute carrier family 13 (sodium-dependent dicarboxylate transporter), member 2
9	ENSMUSG00000001098	-0.180592	0.24081	-0.174788	Kctd10	potassium channel tetramerisation domain containing 10
7	ENSMUSG00000001100	-0.0583412	0.234156	-0.124144	Poldip2	polymerase (DNA-directed), delta interacting protein 2
15	ENSMUSG00000001103	0	-0.116992	0.316993	Sebox	SEBOX homeobox
5	ENSMUSG00000001105	-0.181199	0.165705	-0.434185	Ift20	intraflagellar transport 20
1	ENSMUSG00000001119	-0.024132	-0.0139164	-0.285319	Col6a1	collagen, type VI, alpha 1
1	ENSMUSG00000001120	-0.286949	-0.178764	-0.249764	Pcbp3	poly(rC) binding protein 3
6	ENSMUSG00000001123	0.503119	0.892089	-0.108011	Lgals9	lectin, galactose binding, soluble 9
9	ENSMUSG00000001127	-0.276583	0.161911	-0.248206	Araf	Araf proto-oncogene, serine/threonine kinase
7	ENSMUSG00000001128	0.104138	0.188099	-0.235426	Cfp	complement factor properdin
9	ENSMUSG00000001131	-0.293169	0.126238	-0.3971	Timp1	tissue inhibitor of metalloproteinase 1
7	ENSMUSG00000001134	-0.0743942	0.21465	-0.126844	Uxt	ubiquitously expressed prefoldin like chaperone
9	ENSMUSG00000001138	-0.284501	0.251095	-0.145414	Cnnm3	cyclin M3
9	ENSMUSG00000001143	-0.348059	-0.0258844	0.0313438	Lman2l	lectin, mannose-binding 2-like
9	ENSMUSG00000001150	-0.194963	0.234036	-0.0398036	Mcm3ap	minichromosome maintenance complex component 3 associated protein
7	ENSMUSG00000001151	-0.0914458	0.249453	-0.149638	Pcnt	pericentrin (kendrin)
12	ENSMUSG00000001155	0.6	0.316993	0.316993	Ftcd	formiminotransferase cyclodeaminase
10	ENSMUSG00000001156	0.200931	-0.058418	-0.0937996	Mxd1	MAX dimerization protein 1
9	ENSMUSG00000001157	-0.390008	0.145488	-0.140249	Gmcl1	germ cell-less, spermatogenesis associated 1
5	ENSMUSG00000001158	-0.0554227	0.132371	-0.22219	Snrnp27	small nuclear ribonucleoprotein 27 (U4/U6.U5)
7	ENSMUSG00000001166	0.13444	0.38844	-0.265528	Oas1c	2'-5' oligoadenylate synthetase 1C
6	ENSMUSG00000001168	0.4	0.683007	0.6	Oas1h	2'-5' oligoadenylate synthetase 1H
9	ENSMUSG00000001173	-0.157995	0.141705	-0.176843	Ocrl	OCRL, inositol polyphosphate-5-phosphatase
9	ENSMUSG00000001175	-0.15877	0.236154	-0.179371	Calm1	calmodulin 1
5	ENSMUSG00000001211	-0.0722322	0.18464	-0.21839	Agpat3	1-acylglycerol-3-phosphate O-acyltransferase 3
15	ENSMUSG00000001225	0.2	0.4	0.433985	Slc26a3	solute carrier family 26, member 3
7	ENSMUSG00000001227	-0.0445246	0.127371	-0.168515	Sema6b	sema domain, transmembrane domain (TM), and cytoplasmic domain, (semaphorin) 6B
12	ENSMUSG00000001228	0.290134	0.110638	0.0300936	Uhrf1	ubiquitin-like, containing PHD and RING finger domains, 1
7	ENSMUSG00000001229	-0.086546	0.313131	-0.160742	Dpp9	dipeptidylpeptidase 9
7	ENSMUSG00000001240	0.0217112	0.422412	0.106817	Ramp2	receptor (calcitonin) activity modifying protein 2
5	ENSMUSG00000001247	-0.232084	0.271045	-0.446691	Lsr	lipolysis stimulated lipoprotein receptor
9	ENSMUSG00000001248	-0.337181	0.138578	-0.28733	Gramd1a	GRAM domain containing 1A
13	ENSMUSG00000001249	-0.385822	-0.506545	-0.190771	Hpn	hepsin
2	ENSMUSG00000001260	-0.6	0.6	-0.516992	Gabrg1	gamma-aminobutyric acid (GABA) A receptor, subunit gamma 1
5	ENSMUSG00000001270	-0.200139	0.106265	-0.360726	Ckb	creatine kinase, brain
9	ENSMUSG00000001280	-0.279756	0.185768	-0.149242	Sp1	trans-acting transcription factor 1
5	ENSMUSG00000001281	-0.272024	0.274625	-0.361305	Itgb7	integrin beta 7
5	ENSMUSG00000001285	-0.0396305	0.308812	-0.283046	Myg1	melanocyte proliferating gene 1
9	ENSMUSG00000001288	-0.254008	0.225161	-0.279635	Rarg	retinoic acid receptor, gamma
5	ENSMUSG00000001289	-0.0776457	0.187009	-0.345215	Pfdn5	prefoldin 5
9	ENSMUSG00000001300	-0.315854	0.0721457	-0.0155363	Efnb2	ephrin B2
5	ENSMUSG00000001305	-0.127401	0.278485	-0.308532	Rrp15	ribosomal RNA processing 15 homolog
7	ENSMUSG00000001313	0.022256	0.310154	0.0748131	Rnd2	Rho family GTPase 2
5	ENSMUSG00000001323	-0.0335754	0.280915	-0.259279	Srr	serine racemase
9	ENSMUSG00000001333	-0.258087	0.210342	-0.0567586	Sync	syncoilin
1	ENSMUSG00000001334	0.0490225	-0.0187001	-0.273887	Fndc5	fibronectin type III domain containing 5
9	ENSMUSG00000001348	-0.239368	0.16526	-0.306371	Acp5	acid phosphatase 5, tartrate resistant
5	ENSMUSG00000001349	-0.14179	0.306411	-0.269514	Cnn1	calponin 1
1	ENSMUSG00000001366	-0.0888977	-0.086455	-0.208846	Fbxo9	f-box protein 9
9	ENSMUSG00000001376	-0.312087	0.299725	-0.220262	Vps50	VPS50 EARP/GARPII complex subunit
9	ENSMUSG00000001379	-0.221865	0.124922	-0.294022	No associated gene
9	ENSMUSG00000001380	-0.141375	0.0957467	-0.212785	Hars1	histidyl-tRNA synthetase 1
1	ENSMUSG00000001383	-0.101057	0.0221213	-0.287425	Zmat2	zinc finger, matrin type 2
12	ENSMUSG00000001403	0.299391	-0.313405	-0.0665432	Ube2c	ubiquitin-conjugating enzyme E2C
5	ENSMUSG00000001415	-0.136971	0.329525	-0.243504	Smg5	SMG5 nonsense mediated mRNA decay factor
9	ENSMUSG00000001416	-0.127535	0.122337	-0.103903	Cct3	chaperonin containing Tcp1, subunit 3 (gamma)
12	ENSMUSG00000001417	0.4	0.283008	0.181378	No associated gene
5	ENSMUSG00000001418	-0.0867325	0.229178	-0.263096	Glmp	glycosylated lysosomal membrane protein
9	ENSMUSG00000001419	-0.284346	0.144488	-0.238809	Mef2d	myocyte enhancer factor 2D
7	ENSMUSG00000001420	0.21559	0.31342	-0.0392794	Tmem79	transmembrane protein 79
7	ENSMUSG00000001424	-0.000431769	0.262397	-0.0718438	Snd1	staphylococcal nuclease and tudor domain containing 1
7	ENSMUSG00000001435	0.147231	0.220014	-0.158111	Col18a1	collagen, type XVIII, alpha 1
5	ENSMUSG00000001436	-0.0751814	0.118203	-0.311188	Slc19a1	solute carrier family 19 (folate transporter), member 1
9	ENSMUSG00000001440	-0.146251	0.236593	-0.127268	Kpnb1	karyopherin (importin) beta 1
9	ENSMUSG00000001441	-0.208124	0.127452	-0.104683	Npepps	aminopeptidase puromycin sensitive
6	ENSMUSG00000001444	0.285097	1.08961	-0.212058	Tbx21	T-box 21
9	ENSMUSG00000001445	-0.118967	0.113725	-0.236429	Mrpl10	mitochondrial ribosomal protein L10
9	ENSMUSG00000001467	-0.241477	0.301135	-0.230881	Cyp51	cytochrome P450, family 51
9	ENSMUSG00000001472	-0.255126	0.21806	-0.226194	Tcf25	transcription factor 25 (basic helix-loop-helix)
7	ENSMUSG00000001473	0.0369604	0.201258	-0.163155	Tubb6	tubulin, beta 6 class V
5	ENSMUSG00000001482	-0.0439543	0.203278	-0.289614	Def8	differentially expressed in FDCP 8
7	ENSMUSG00000001493	-0.129881	0.323477	-0.142849	Meox1	mesenchyme homeobox 1
11	ENSMUSG00000001494	0.316993	0.0830075	-0.4	Sost	sclerostin
10	ENSMUSG00000001496	0	0	0	Nkx2-1	NK2 homeobox 1
13	ENSMUSG00000001497	-0.848716	-0.559673	0.408824	Pax9	paired box 9
7	ENSMUSG00000001504	0	0.2	0.2	Irx2	Iroquois homeobox 2
10	ENSMUSG00000001506	-0.0068272	0.0208177	-0.0431856	Col1a1	collagen, type I, alpha 1
7	ENSMUSG00000001507	-0.0155043	0.30663	-0.205188	Itga3	integrin alpha 3
5	ENSMUSG00000001508	-0.347393	0.264386	-0.4	Sgca	sarcoglycan, alpha (dystrophin-associated glycoprotein)
10	ENSMUSG00000001510	0	0	0	Dlx3	distal-less homeobox 3
7	ENSMUSG00000001517	0.11325	0.271596	0.0121735	Foxm1	forkhead box M1
9	ENSMUSG00000001518	-0.210814	0.159092	-0.171246	Itfg2	integrin alpha FG-GAP repeat containing 2
9	ENSMUSG00000001520	-0.251642	0.218351	-0.15302	Nrip2	nuclear receptor interacting protein 2
9	ENSMUSG00000001521	-0.135158	0.146528	-0.171739	Tulp3	tubby-like protein 3
1	ENSMUSG00000001524	-0.0410173	0.0878258	-0.365258	Gtf2h4	general transcription factor II H, polypeptide 4
7	ENSMUSG00000001525	0.018946	0.233361	-0.122725	Tubb5	tubulin, beta 5 class I
7	ENSMUSG00000001542	-0.0941265	0.166298	-0.0468628	Ell2	elongation factor for RNA polymerase II 2
7	ENSMUSG00000001552	0.0306804	0.157654	-0.104969	Jup	junction plakoglobin
10	ENSMUSG00000001555	-0.0443264	-0.00122121	-0.119777	Fkbp10	FK506 binding protein 10
14	ENSMUSG00000001558	0.038529	0.674879	0.194051	Klhl10	kelch-like 10
10	ENSMUSG00000001566	0	0	0	Mnx1	motor neuron and pancreas homeobox 1
9	ENSMUSG00000001569	-0.140222	0.235313	-0.195531	Nom1	nucleolar protein with MIF4G domain 1
5	ENSMUSG00000001576	-0.0867541	0.304369	-0.259164	Ergic1	endoplasmic reticulum-golgi intermediate compartment (ERGIC) 1
9	ENSMUSG00000001583	-0.384196	0.0625164	-0.205255	Tnk1	tyrosine kinase, non-receptor, 1
9	ENSMUSG00000001588	-0.222514	0.168414	-0.285572	Acap1	ArfGAP with coiled-coil, ankyrin repeat and PH domains 1
3	ENSMUSG00000001604	-0.730415	-0.0444785	-0.389507	Tcea3	transcription elongation factor A (SII), 3
1	ENSMUSG00000001622	0	0	-0.2	Csn3	casein kappa
9	ENSMUSG00000001627	-0.224808	0.141251	-0.315785	Ifrd1	interferon-related developmental regulator 1
9	ENSMUSG00000001630	-0.360381	0.142295	-0.0632868	Stk38l	serine/threonine kinase 38 like
9	ENSMUSG00000001632	-0.179668	0.172241	-0.239748	Brpf1	bromodomain and PHD finger containing, 1
5	ENSMUSG00000001642	-0.181926	0.362927	-0.260322	Akr1b3	aldo-keto reductase family 1, member B3 (aldose reductase)
7	ENSMUSG00000001655	0	0.4	0	Hoxc13	homeobox C13
10	ENSMUSG00000001656	0	0	0	Hoxc11	homeobox C11
7	ENSMUSG00000001657	0	0.516992	0	Hoxc8	homeobox C8
1	ENSMUSG00000001661	0.116992	0.0830075	-0.316993	Hoxc6	homeobox C6
1	ENSMUSG00000001663	-0.0305415	-0.246395	-0.31896	Gstt1	glutathione S-transferase, theta 1
9	ENSMUSG00000001665	-0.226347	0.374391	-0.1979	Gstt3	glutathione S-transferase, theta 3
7	ENSMUSG00000001666	0.0334927	0.398457	-0.0179466	Ddt	D-dopachrome tautomerase
10	ENSMUSG00000001670	0	0	0.2	Tat	tyrosine aminotransferase
3	ENSMUSG00000001672	-0.916992	0.381378	0.0830075	Marveld3	MARVEL (membrane-associating) domain containing 3
9	ENSMUSG00000001674	-0.344779	0.148873	-0.322857	Ddx18	DEAD box helicase 18
9	ENSMUSG00000001687	-0.280828	0.192496	-0.105905	Ubl3	ubiquitin-like 3
5	ENSMUSG00000001700	-0.141232	0.305958	-0.30529	Gramd2b	GRAM domain containing 2B
5	ENSMUSG00000001707	-0.0286698	0.127679	-0.233694	Eef1e1	eukaryotic translation elongation factor 1 epsilon 1
5	ENSMUSG00000001729	-0.0702132	0.348123	-0.292437	Akt1	thymoma viral proto-oncogene 1
12	ENSMUSG00000001739	0.799169	0.0579013	0.0775821	Cldn15	claudin 15
9	ENSMUSG00000001741	-0.277103	0.265075	-0.180494	Il16	interleukin 16
5	ENSMUSG00000001750	-0.0931099	0.35231	-0.255977	Tcirg1	T cell, immune regulator 1, ATPase, H+ transporting, lysosomal V0 protein A3
7	ENSMUSG00000001751	-0.0927371	0.240918	-0.178133	Naglu	alpha-N-acetylglucosaminidase (Sanfilippo disease IIIB)
5	ENSMUSG00000001755	-0.057592	0.24198	-0.219189	Coasy	Coenzyme A synthase
5	ENSMUSG00000001761	-0.0591411	0.159287	-0.261085	Smo	smoothened, frizzled class receptor
4	ENSMUSG00000001763	0.108628	-0.514961	0.134353	Tspan33	tetraspanin 33
9	ENSMUSG00000001767	-0.287172	0.224098	-0.247242	Crnkl1	crooked neck pre-mRNA splicing factor 1
5	ENSMUSG00000001768	-0.306165	0.353725	-0.338846	Rin2	Ras and Rab interactor 2
14	ENSMUSG00000001773	-0.77325	0.791872	-0.185922	Folh1	folate hydrolase 1
9	ENSMUSG00000001774	-0.451887	0.0726715	-0.0523145	Chordc1	cysteine and histidine-rich domain (CHORD)-containing, zinc-binding protein 1
5	ENSMUSG00000001783	-0.126104	0.287375	-0.207265	Rtcb	RNA 2',3'-cyclic phosphate and 5'-OH ligase
9	ENSMUSG00000001785	-0.138731	0.102347	-0.265981	Pwp1	PWP1 homolog, endonuclein
10	ENSMUSG00000001786	0.0525948	-0.0886256	-0.0112384	Fbxo7	F-box protein 7
5	ENSMUSG00000001794	-0.100084	0.253646	-0.186409	Capns1	calpain, small subunit 1
1	ENSMUSG00000001802	-0.0372803	-0.0723522	-0.210171	Lrp3	low density lipoprotein receptor-related protein 3
10	ENSMUSG00000001804	0	0	0	Dsg4	desmoglein 4
10	ENSMUSG00000001815	0	0	0	Evx2	even-skipped homeobox 2
10	ENSMUSG00000001819	0	0	0	Hoxd13	homeobox D13
10	ENSMUSG00000001823	0	0	0	Hoxd12	homeobox D12
8	ENSMUSG00000001827	-0.116992	-0.497085	-0.747393	Folr1	folate receptor 1 (adult)
7	ENSMUSG00000001829	-0.0586007	0.219639	-0.147469	Clpb	ClpB caseinolytic peptidase B
9	ENSMUSG00000001833	-0.234955	0.23748	-0.257567	Septin7	septin 7
5	ENSMUSG00000001844	-0.00136423	0.204853	-0.313888	Zdhhc4	zinc finger, DHHC domain containing 4
9	ENSMUSG00000001847	-0.141822	0.253506	-0.17782	Rac1	Rac family small GTPase 1
9	ENSMUSG00000001855	-0.14267	0.234304	-0.0983967	Nup214	nucleoporin 214
5	ENSMUSG00000001864	-0.483522	0.401407	-0.451478	Aif1l	allograft inflammatory factor 1-like
1	ENSMUSG00000001865	-0.0281557	0.0412902	-0.372499	Cpa3	carboxypeptidase A3, mast cell
9	ENSMUSG00000001870	-0.129334	0.10963	-0.081717	Ltbp1	latent transforming growth factor beta binding protein 1
9	ENSMUSG00000001891	-0.160735	0.141952	-0.161579	Ugp2	UDP-glucose pyrophosphorylase 2
6	ENSMUSG00000001901	1.03398	0.8	-0.230401	Kcnh6	potassium voltage-gated channel, subfamily H (eag-related), member 6
5	ENSMUSG00000001909	-0.109901	0.115151	-0.319562	Trmt1	tRNA methyltransferase 1
7	ENSMUSG00000001910	0.00806746	0.275539	-0.0854322	Nacc1	nucleus accumbens associated 1, BEN and BTB (POZ) domain containing
9	ENSMUSG00000001911	-0.260395	-0.0096551	-0.08655	Nfix	nuclear factor I/X
1	ENSMUSG00000001918	0.00276315	0.0722799	-0.18705	Slc1a5	solute carrier family 1 (neutral amino acid transporter), member 5
7	ENSMUSG00000001924	-0.0852655	0.27946	-0.0502633	Uba1	ubiquitin-like modifier activating enzyme 1
10	ENSMUSG00000001930	0.0519021	0.117919	-0.0892945	Vwf	Von Willebrand factor
9	ENSMUSG00000001942	-0.245079	0.289562	-0.176079	Siae	sialic acid acetylesterase
1	ENSMUSG00000001943	-0.209461	-0.0366493	-0.390321	Vsig2	V-set and immunoglobulin domain containing 2
1	ENSMUSG00000001946	-0.054294	-0.0626792	-0.404911	Esam	endothelial cell-specific adhesion molecule
5	ENSMUSG00000001948	-0.051131	0.160816	-0.320716	Spa17	sperm autoantigenic protein 17
5	ENSMUSG00000001962	-0.196703	0.173543	-0.298908	Fam50a	family with sequence similarity 50, member A
9	ENSMUSG00000001964	-0.138898	0.11135	-0.23381	Emd	emerin
9	ENSMUSG00000001983	-0.292151	0.406587	-0.173858	Taco1	translational activator of mitochondrially encoded cytochrome c oxidase I
13	ENSMUSG00000001985	-0.161471	-0.283008	0.316993	Grik3	glutamate receptor, ionotropic, kainate 3
9	ENSMUSG00000001986	-0.217014	0.15625	-0.208396	Gria3	glutamate receptor, ionotropic, AMPA3 (alpha 3)
8	ENSMUSG00000001988	-0.1673	-0.0354609	-0.736365	Npas1	neuronal PAS domain protein 1
10	ENSMUSG00000001995	-0.117664	0.0939704	-0.0545931	Sipa1l2	signal-induced proliferation-associated 1 like 2
9	ENSMUSG00000001998	-0.273158	0.21896	-0.0671826	Ap4e1	adaptor-related protein complex AP-4, epsilon 1
5	ENSMUSG00000001999	0.0221241	0.271754	-0.264802	Blvra	biliverdin reductase A
8	ENSMUSG00000002006	-0.224045	-0.106416	-0.601907	Pdzd4	PDZ domain containing 4
9	ENSMUSG00000002007	-0.126292	0.163946	-0.231712	Srpk3	serine/arginine-rich protein specific kinase 3
5	ENSMUSG00000002010	-0.0377014	0.207188	-0.249804	Idh3g	isocitrate dehydrogenase 3 (NAD+), gamma
1	ENSMUSG00000002012	-0.279117	-0.16285	-0.227212	Pnck	pregnancy upregulated non-ubiquitously expressed CaM kinase
5	ENSMUSG00000002014	-0.148972	0.18816	-0.328385	Ssr4	signal sequence receptor, delta
5	ENSMUSG00000002015	-0.0924161	0.16621	-0.29751	Bcap31	B cell receptor associated protein 31
9	ENSMUSG00000002017	-0.183662	0.221382	-0.200916	Fam98a	family with sequence similarity 98, member A
1	ENSMUSG00000002020	-0.103592	-0.115539	-0.221486	Ltbp2	latent transforming growth factor beta binding protein 2
9	ENSMUSG00000002028	-0.335697	0.276437	-0.0611027	Kmt2a	lysine (K)-specific methyltransferase 2A
7	ENSMUSG00000002031	-0.0891861	0.30805	-0.0929355	Ift46	intraflagellar transport 46
6	ENSMUSG00000002032	0.316993	0.6	0.245764	Tmem25	transmembrane protein 25
5	ENSMUSG00000002033	-0.292825	0.209804	-0.367052	Cd3g	CD3 antigen, gamma polypeptide
5	ENSMUSG00000002043	-0.0870701	0.241762	-0.254824	Trappc6a	trafficking protein particle complex 6A
7	ENSMUSG00000002052	-0.14467	0.238418	-0.0711043	Supt6	SPT6, histone chaperone and transcription elongation factor
12	ENSMUSG00000002055	0.410706	-0.00747539	0.0960254	Spag5	sperm associated antigen 5
10	ENSMUSG00000002057	-0.2	-0.116992	0	Foxn1	forkhead box N1
5	ENSMUSG00000002058	-0.0856143	0.337041	-0.272823	Unc119	unc-119 lipid binding chaperone
1	ENSMUSG00000002059	-0.103789	-0.145434	-0.166761	Rab34	RAB34, member RAS oncogene family
9	ENSMUSG00000002064	-0.254332	0.205707	-0.247172	Sdf2	stromal cell derived factor 2
10	ENSMUSG00000002068	0.0680215	-0.0440824	0.058585	Ccne1	cyclin E1
8	ENSMUSG00000002076	-0.516992	-0.313408	-0.4	Hsf2bp	heat shock transcription factor 2 binding protein
1	ENSMUSG00000002083	-0.0594631	-0.021882	-0.374073	Bbc3	BCL2 binding component 3
14	ENSMUSG00000002100	-0.522942	1.38897	-0.614613	Mybpc3	myosin binding protein C, cardiac
5	ENSMUSG00000002102	-0.0856409	0.151177	-0.211726	Psmc3	proteasome (prosome, macropain) 26S subunit, ATPase 3
9	ENSMUSG00000002103	-0.188816	0.228305	-0.248965	Acp2	acid phosphatase 2, lysosomal
9	ENSMUSG00000002104	-0.484293	0.0894918	-0.278463	Rapsn	receptor-associated protein of the synapse
5	ENSMUSG00000002105	-0.230142	0.146263	-0.50769	Slc39a13	solute carrier family 39 (metal ion transporter), member 13
9	ENSMUSG00000002107	-0.180689	0.315249	-0.17789	Celf2	CUGBP, Elav-like family member 2
7	ENSMUSG00000002108	0.124562	0.319878	-0.140575	Nr1h3	nuclear receptor subfamily 1, group H, member 3
9	ENSMUSG00000002109	-0.304104	0.211012	-0.323168	Ddb2	damage specific DNA binding protein 2
5	ENSMUSG00000002111	-0.0922014	0.352903	-0.232472	Spi1	spleen focus forming virus (SFFV) proviral integration oncogene
9	ENSMUSG00000002129	-0.19393	0.199038	-0.0720664	Sf3a1	splicing factor 3a, subunit 1
9	ENSMUSG00000002147	-0.245265	0.132307	-0.172313	Stat6	signal transducer and activator of transcription 6
2	ENSMUSG00000002190	-0.6	0.833985	-0.716993	Clgn	calmegin
5	ENSMUSG00000002204	-0.165028	0.25724	-0.338277	Napsa	napsin A aspartic peptidase
5	ENSMUSG00000002205	-0.0934187	0.409288	-0.254645	Vrk3	vaccinia related kinase 3
1	ENSMUSG00000002210	-0.0694833	0.0845479	-0.209776	Smg9	SMG9 nonsense mediated mRNA decay factor
7	ENSMUSG00000002221	0.0340424	0.144402	-0.0915479	Paxip1	PAX interacting (with transcription-activation domain) protein 1
9	ENSMUSG00000002222	-0.304155	0.13809	-0.0505278	Rmnd5a	required for meiotic nuclear division 5 homolog A
6	ENSMUSG00000002227	0.471247	0.813595	-0.200144	Mov10	Mov10 RISC complex RNA helicase
7	ENSMUSG00000002228	0.185971	0.68156	-0.265837	Ppm1j	protein phosphatase 1J
1	ENSMUSG00000002233	-0.120908	0.0381427	-0.301625	Rhoc	ras homolog family member C
10	ENSMUSG00000002240	0	0	0	Prr27	proline rich 27
8	ENSMUSG00000002249	-0.325656	0.0771889	-0.67869	Tead3	TEA domain family member 3
9	ENSMUSG00000002250	-0.156169	0.315263	-0.175468	Ppard	peroxisome proliferator activator receptor delta
5	ENSMUSG00000002257	-0.201506	0.237792	-0.284142	Def6	differentially expressed in FDCP 6
13	ENSMUSG00000002265	-0.264829	-0.30617	-0.210332	Peg3	paternally expressed 3
6	ENSMUSG00000002266	0.381378	0.516992	-0.2	Zim1	zinc finger, imprinted 1
5	ENSMUSG00000002274	-0.0491134	0.224533	-0.535654	Metrn	meteorin, glial cell differentiation regulator
5	ENSMUSG00000002279	-0.0138634	0.170988	-0.242658	Lmf1	lipase maturation factor 1
9	ENSMUSG00000002280	-0.223521	0.130215	-0.274181	Ciao3	cytosolic iron-sulfur assembly component 3
1	ENSMUSG00000002289	0.0225685	-0.0107858	-0.683173	Angptl4	angiopoietin-like 4
7	ENSMUSG00000002297	0.0776092	0.15127	-0.0479377	Dbf4	DBF4 zinc finger
6	ENSMUSG00000002307	0.34341	0.578042	-0.279729	Daxx	Fas death domain-associated protein
14	ENSMUSG00000002308	-0.467896	0.746181	-0.448641	Cd320	CD320 antigen
5	ENSMUSG00000002319	-0.0978092	0.289962	-0.35869	Ipo4	importin 4
5	ENSMUSG00000002320	-0.0278793	0.283705	-0.228117	Tm9sf1	transmembrane 9 superfamily member 1
15	ENSMUSG00000002324	-0.0304006	0.239934	0.581378	Rec8	REC8 meiotic recombination protein
6	ENSMUSG00000002325	0.564727	0.684108	-0.137226	Irf9	interferon regulatory factor 9
9	ENSMUSG00000002326	-0.190385	0.217127	-0.217746	Gmpr2	guanosine monophosphate reductase 2
9	ENSMUSG00000002329	-0.211677	0.220603	-0.273707	Mdp1	magnesium-dependent phosphatase 1
7	ENSMUSG00000002332	-0.0418679	0.294504	-0.199577	Dhrs1	dehydrogenase/reductase (SDR family) member 1
2	ENSMUSG00000002341	-0.54587	0.664386	-0.527486	Ncan	neurocan
5	ENSMUSG00000002342	-0.138662	0.0684548	-0.39837	Tmem161a	transmembrane protein 161A
5	ENSMUSG00000002343	-0.0431974	0.218999	-0.258956	Armc6	armadillo repeat containing 6
9	ENSMUSG00000002345	-0.210975	0.244284	-0.144793	Borcs8	BLOC-1 related complex subunit 8
10	ENSMUSG00000002346	-0.0779201	0.036115	-0.0372136	Slc25a42	solute carrier family 25, member 42
9	ENSMUSG00000002365	-0.307456	0.140158	-0.151416	Snx9	sorting nexin 9
5	ENSMUSG00000002372	-0.131406	0.263085	-0.303661	Ranbp3	RAN binding protein 3
7	ENSMUSG00000002379	-0.0560204	0.186861	-0.159664	Ndufa11	NADH:ubiquinone oxidoreductase subunit A11
9	ENSMUSG00000002384	-0.475744	-0.0959285	-0.206948	Bmp8b	bone morphogenetic protein 8b
1	ENSMUSG00000002393	-0.0635293	0.0504633	-0.476507	Nr2f6	nuclear receptor subfamily 2, group F, member 6
5	ENSMUSG00000002395	0.0175239	0.291027	-0.365958	Use1	unconventional SNARE in the ER 1 homolog (S. cerevisiae)
5	ENSMUSG00000002396	-0.103856	0.21894	-0.362598	Ocel1	occludin/ELL domain containing 1
7	ENSMUSG00000002409	-0.204849	0.347906	-0.0356359	Dyrk1b	dual-specificity tyrosine-(Y)-phosphorylation regulated kinase 1b
9	ENSMUSG00000002413	-0.337559	0.232588	-0.102371	Braf	Braf transforming gene
9	ENSMUSG00000002416	-0.362979	0.102224	-0.326523	Ndufb2	NADH:ubiquinone oxidoreductase subunit B2
9	ENSMUSG00000002428	-0.335342	0.253695	-0.105794	Hltf	helicase-like transcription factor
9	ENSMUSG00000002455	-0.218529	0.165938	-0.215507	Prpf6	pre-mRNA splicing factor 6
5	ENSMUSG00000002458	-0.12357	0.284063	-0.180691	Rgs19	regulator of G-protein signaling 19
13	ENSMUSG00000002459	0	-0.8	0.433985	Rgs20	regulator of G-protein signaling 20
3	ENSMUSG00000002475	-0.961471	0.2	-0.272514	Abhd3	abhydrolase domain containing 3
5	ENSMUSG00000002477	-0.0869419	0.246914	-0.36637	Snrpd1	small nuclear ribonucleoprotein D1
1	ENSMUSG00000002486	-0.100316	0.0492618	-0.225083	Tchp	trichoplein, keratin filament binding
9	ENSMUSG00000002489	-0.179711	0.162816	-0.0560174	Tiam1	T cell lymphoma invasion and metastasis 1
9	ENSMUSG00000002496	-0.201952	0.239558	-0.151754	Tsc2	TSC complex subunit 2
4	ENSMUSG00000002500	0.57325	-0.864386	0.684293	Rpl3l	ribosomal protein L3-like
9	ENSMUSG00000002504	-0.176072	0.241032	-0.068246	Nherf2	NHERF family PDZ scaffold protein 2
5	ENSMUSG00000002524	-0.127472	0.282934	-0.254236	Puf60	poly-U binding splicing factor 60
9	ENSMUSG00000002546	-0.161016	0.181645	-0.210979	Golga2	golgin A2
5	ENSMUSG00000002550	-0.183381	0.272028	-0.272646	Uck1	uridine-cytidine kinase 1
14	ENSMUSG00000002565	0.144493	0.761439	-0.173762	Scin	scinderin
9	ENSMUSG00000002578	-0.326259	0.128295	-0.0401676	Ikzf4	IKAROS family zinc finger 4
5	ENSMUSG00000002580	-0.183426	0.438672	-0.527262	Mien1	migration and invasion enhancer 1
4	ENSMUSG00000002588	0.0830075	-0.516992	0	Pon1	paraoxonase 1
7	ENSMUSG00000002602	0.150736	0.389486	-0.104584	Axl	AXL receptor tyrosine kinase
7	ENSMUSG00000002603	-0.108165	0.219693	-0.1041	Tgfb1	transforming growth factor, beta 1
9	ENSMUSG00000002608	-0.185387	0.266754	-0.146133	Ccdc97	coiled-coil domain containing 97
9	ENSMUSG00000002617	-0.28876	0.202828	-0.249212	Zfp40	zinc finger protein 40
9	ENSMUSG00000002625	-0.221039	0.042721	-0.16311	Akap8l	A kinase (PRKA) anchor protein 8-like
10	ENSMUSG00000002633	0	0	0	Shh	sonic hedgehog
7	ENSMUSG00000002635	-0.0843916	0.39954	-0.103087	Pdcd2l	programmed cell death 2-like
10	ENSMUSG00000002658	-0.00053108	0.0979405	-0.113725	Gtf2f1	general transcription factor IIF, polypeptide 1
5	ENSMUSG00000002660	-0.208384	0.145527	-0.473292	Clpp	caseinolytic mitochondrial matrix peptidase proteolytic subunit
3	ENSMUSG00000002661	-0.99135	0.263237	-0.0760557	Alkbh7	alkB homolog 7
15	ENSMUSG00000002664	0.116992	0.6	0.664386	Pspn	persephin
9	ENSMUSG00000002668	-0.168674	0.183365	-0.249637	Dennd1c	DENN domain containing 1C
1	ENSMUSG00000002679	-0.126741	0.06167	-0.246161	Med6	mediator complex subunit 6
10	ENSMUSG00000002688	-0.125749	0.141444	-0.0209071	Prkd1	protein kinase D1
9	ENSMUSG00000002699	-0.163992	0.261934	-0.133022	Lcp2	lymphocyte cytosolic protein 2
9	ENSMUSG00000002718	-0.17878	0.28506	-0.13123	Cse1l	chromosome segregation 1-like (S. cerevisiae)
5	ENSMUSG00000002728	-0.0595909	0.199335	-0.402861	Naa20	N(alpha)-acetyltransferase 20, NatB catalytic subunit
5	ENSMUSG00000002731	-0.116769	0.209366	-0.319574	Prkra	protein kinase, interferon inducible double stranded RNA dependent activator
8	ENSMUSG00000002732	-0.3852	-0.0242135	-0.57333	Fkbp7	FK506 binding protein 7
5	ENSMUSG00000002733	-0.0949895	0.231865	-0.250475	Plekha3	pleckstrin homology domain-containing, family A (phosphoinositide binding specific) member 3
5	ENSMUSG00000002741	-0.101961	0.272131	-0.269062	Ykt6	YKT6 v-SNARE homolog (S. cerevisiae)
9	ENSMUSG00000002748	-0.263934	0.215539	-0.0850058	Baz1b	bromodomain adjacent to zinc finger domain, 1B
9	ENSMUSG00000002763	-0.20402	0.20331	-0.282764	Pex6	peroxisomal biogenesis factor 6
5	ENSMUSG00000002767	-0.116033	0.17169	-0.401437	Mrpl2	mitochondrial ribosomal protein L2
7	ENSMUSG00000002768	0.00150906	0.314822	-0.203768	Mea1	male enhanced antigen 1
1	ENSMUSG00000002769	-0.11943	-0.286592	-0.454545	Gnmt	glycine N-methyltransferase
9	ENSMUSG00000002771	-0.211904	0.159734	-0.245075	Grin2d	glutamate receptor, ionotropic, NMDA2D (epsilon 4)
5	ENSMUSG00000002778	-0.113375	0.274413	-0.220396	Kdelr1	KDEL (Lys-Asp-Glu-Leu) endoplasmic reticulum protein retention receptor 1
5	ENSMUSG00000002781	-0.0993501	0.230337	-0.188988	Tmem143	transmembrane protein 143
15	ENSMUSG00000002791	0	0.2	0.716993	Pdxk-ps	pyridoxal (pyridoxine, vitamin B6) kinase, pseudogene
9	ENSMUSG00000002797	-0.28553	0.458689	-0.138958	Ggct	gamma-glutamyl cyclotransferase
9	ENSMUSG00000002799	-0.197464	0.209926	-0.211472	Jag2	jagged 2
9	ENSMUSG00000002803	-0.374448	0.221113	-0.270115	Btbd6	BTB (POZ) domain containing 6
5	ENSMUSG00000002804	-0.00830373	0.236979	-0.228323	Nudt14	nudix hydrolase 14
13	ENSMUSG00000002808	-0.217446	-0.257689	0.115837	Epdr1	ependymin related protein 1 (zebrafish)
7	ENSMUSG00000002812	-0.117357	0.312429	-0.136735	Flii	flightless I actin binding protein
5	ENSMUSG00000002814	-0.0456745	0.22436	-0.218856	Top3a	topoisomerase (DNA) III alpha
5	ENSMUSG00000002820	-0.132812	0.163944	-0.371269	Atg4d	autophagy related 4D, cysteine peptidase
9	ENSMUSG00000002825	-0.38928	0.119986	-0.355566	Qtrt1	queuine tRNA-ribosyltransferase catalytic subunit 1
8	ENSMUSG00000002831	-0.412793	-0.0304006	-0.828786	Plin4	perilipin 4
5	ENSMUSG00000002833	-0.16559	0.251103	-0.252712	Hdgfl2	HDGF like 2
10	ENSMUSG00000002835	0.110919	0.0410325	-0.0571409	Chaf1a	chromatin assembly factor 1, subunit A (p150)
7	ENSMUSG00000002844	-0.0687894	0.244383	-0.192511	Adprh	ADP-ribosylarginine hydrolase
9	ENSMUSG00000002845	-0.212887	0.200533	-0.187474	Tmem39a	transmembrane protein 39a
5	ENSMUSG00000002846	-0.189204	0.194659	-0.299766	Timmdc1	translocase of inner mitochondrial membrane domain containing 1
14	ENSMUSG00000002847	-0.405949	0.624692	0.321489	Pla1a	phospholipase A1 member A
10	ENSMUSG00000002870	0.105251	0.0159695	0.0334913	Mcm2	minichromosome maintenance complex component 2
5	ENSMUSG00000002871	-0.0569524	0.169129	-0.257728	Tpra1	transmembrane protein, adipocyte asscociated 1
9	ENSMUSG00000002881	-0.171753	0.199334	-0.227451	Nab1	Ngfi-A binding protein 1
9	ENSMUSG00000002885	-0.277692	0.247054	-0.109244	Adgre5	adhesion G protein-coupled receptor E5
9	ENSMUSG00000002897	-0.306436	0.300874	-0.280281	Il17ra	interleukin 17 receptor A
10	ENSMUSG00000002900	-0.0793405	-0.161481	0.0191681	Lamb1	laminin B1
13	ENSMUSG00000002908	-0.513408	-0.125121	0.00082088	Kcnn1	potassium intermediate/small conductance calcium-activated channel, subfamily N, member 1
5	ENSMUSG00000002910	-0.0203539	0.18361	-0.25325	Arrdc2	arrestin domain containing 2
10	ENSMUSG00000002930	-0.2	0	0	Ppp1r17	protein phosphatase 1, regulatory subunit 17
10	ENSMUSG00000002944	0.0472059	0.108927	0.0208292	Cd36	CD36 molecule
5	ENSMUSG00000002948	-0.227726	0.235904	-0.311344	Map2k7	mitogen-activated protein kinase kinase 7
5	ENSMUSG00000002949	-0.111235	0.211186	-0.312937	Timm44	translocase of inner mitochondrial membrane 44
10	ENSMUSG00000002957	-0.129662	0.0603509	-0.103179	Ap2a2	adaptor-related protein complex 2, alpha 2 subunit
5	ENSMUSG00000002963	-0.143366	0.264853	-0.356908	Pnkp	polynucleotide kinase 3'- phosphatase
9	ENSMUSG00000002968	-0.234046	0.137549	-0.210589	Med25	mediator complex subunit 25
1	ENSMUSG00000002980	-0.0765724	0.059224	-0.350187	Bcam	basal cell adhesion molecule
5	ENSMUSG00000002981	-0.0564046	0.228949	-0.23737	Clptm1	cleft lip and palate associated transmembrane protein 1
9	ENSMUSG00000002983	-0.180832	0.186302	-0.162697	Relb	avian reticuloendotheliosis viral (v-rel) oncogene related B
7	ENSMUSG00000002984	-0.111985	0.338071	-0.170538	Tomm40	translocase of outer mitochondrial membrane 40
5	ENSMUSG00000002985	-0.158299	0.0978872	-0.340858	Apoe	apolipoprotein E
9	ENSMUSG00000002992	-0.4	0.369599	-0.0830075	Apoc2	apolipoprotein C2
9	ENSMUSG00000002996	-0.33851	0.069467	-0.195018	Hbp1	high mobility group box transcription factor 1
10	ENSMUSG00000002997	-0.0284078	-0.082005	-0.0705042	Prkar2b	protein kinase, cAMP dependent regulatory, type II beta
9	ENSMUSG00000003031	-0.312968	0.0794171	-0.178452	Cdkn1b	cyclin dependent kinase inhibitor 1B
7	ENSMUSG00000003032	-0.101667	0.402026	-0.130899	Klf4	Kruppel-like transcription factor 4 (gut)
5	ENSMUSG00000003033	-0.172393	0.320695	-0.23645	Ap1m1	adaptor-related protein complex AP-1, mu subunit 1
9	ENSMUSG00000003037	-0.173004	0.274504	-0.188357	Rab8a	RAB8A, member RAS oncogene family
5	ENSMUSG00000003038	0.0619405	0.219428	-0.283629	Hmgn2	high mobility group nucleosomal binding domain 2
9	ENSMUSG00000003039	-0.260149	0.183757	-0.272376	Fam32a	family with sequence similarity 32, member A
10	ENSMUSG00000003051	0	-0.2	0	Elf3	E74-like factor 3
10	ENSMUSG00000003053	0	0	0	Cyp2c29	cytochrome P450, family 2, subfamily c, polypeptide 29
5	ENSMUSG00000003062	-0.0253943	0.173801	-0.253252	Stard3nl	STARD3 N-terminal like
1	ENSMUSG00000003068	-0.133782	0.0312738	-0.300729	Stk11	serine/threonine kinase 11
8	ENSMUSG00000003070	-0.580093	0.0918863	-1.26008	Efna2	ephrin A2
5	ENSMUSG00000003072	0.0338595	0.196097	-0.312683	Atp5d	ATP synthase, H+ transporting, mitochondrial F1 complex, delta subunit
5	ENSMUSG00000003099	-0.14414	0.188919	-0.368061	Ppp5c	protein phosphatase 5, catalytic subunit
7	ENSMUSG00000003119	-0.131063	0.273279	-0.05315	Cdk12	cyclin dependent kinase 12
9	ENSMUSG00000003123	-0.200811	0.156903	-0.263664	Lipe	lipase, hormone sensitive
9	ENSMUSG00000003131	-0.191947	0.227077	-0.0913878	Pafah1b2	platelet-activating factor acetylhydrolase, isoform 1b, subunit 2
5	ENSMUSG00000003134	-0.0762529	0.135366	-0.224472	Tbc1d8	TBC1 domain family, member 8
5	ENSMUSG00000003135	-0.093467	0.162333	-0.237219	Cnot11	CCR4-NOT transcription complex, subunit 11
5	ENSMUSG00000003153	-0.0941621	0.180857	-0.253562	Slc2a3	solute carrier family 2 (facilitated glucose transporter), member 3
9	ENSMUSG00000003154	-0.244946	0.123447	-0.207122	Foxj2	forkhead box J2
9	ENSMUSG00000003161	-0.202651	0.146004	-0.231245	Sri	sorcin
5	ENSMUSG00000003166	-0.189634	0.29858	-0.276422	Dgcr2	DiGeorge syndrome critical region gene 2
7	ENSMUSG00000003178	-0.0135009	0.16067	0.0207088	No associated gene
5	ENSMUSG00000003184	-0.208732	0.192177	-0.309718	Irf3	interferon regulatory factor 3
9	ENSMUSG00000003190	-0.216342	0.272637	-0.163282	Bcl2l12	BCL2-like 12 (proline rich)
9	ENSMUSG00000003198	-0.394248	0.277822	-0.368133	Zfp959	zinc finger protein 959
5	ENSMUSG00000003199	-0.193142	0.24746	-0.377116	Mpnd	MPN domain containing
5	ENSMUSG00000003200	-0.0750099	0.208276	-0.291091	Sh3gl1	SH3-domain GRB2-like 1
7	ENSMUSG00000003206	0.163241	0.285776	-0.109737	Ebi3	Epstein-Barr virus induced gene 3
9	ENSMUSG00000003208	-0.2868	0.219721	-0.213679	Yju2	YJU2 splicing factor
9	ENSMUSG00000003226	-0.299851	0.293638	-0.0804292	Ranbp2	RAN binding protein 2
1	ENSMUSG00000003227	-0.238529	-0.331209	-0.317743	Edar	ectodysplasin-A receptor
7	ENSMUSG00000003228	-0.147023	0.284116	-0.094902	Grk5	G protein-coupled receptor kinase 5
9	ENSMUSG00000003233	-0.182474	0.260534	-0.151529	Dvl3	dishevelled segment polarity protein 3
5	ENSMUSG00000003234	-0.148284	0.244983	-0.302789	Abcf3	ATP-binding cassette, sub-family F (GCN20), member 3
5	ENSMUSG00000003235	-0.17892	0.253004	-0.255518	Eif2b5	eukaryotic translation initiation factor 2B, subunit 5 epsilon
5	ENSMUSG00000003269	-0.236016	0.22574	-0.350715	Cyth2	cytohesin 2
15	ENSMUSG00000003271	-0.2	0.6	0.483007	Sult2b1	sulfotransferase family, cytosolic, 2B, member 1
10	ENSMUSG00000003273	0.117507	0.0918863	-0.171844	Car11	carbonic anhydrase 11
10	ENSMUSG00000003279	0	-0.0830075	-0.116992	Dlgap1	DLG associated protein 1
9	ENSMUSG00000003282	-0.394631	0.134393	0.0361639	Plag1	pleiomorphic adenoma gene 1
7	ENSMUSG00000003283	0.149149	0.402117	-0.173449	Hck	hemopoietic cell kinase
5	ENSMUSG00000003299	-0.0137857	0.268559	-0.322625	Mrpl4	mitochondrial ribosomal protein L4
7	ENSMUSG00000003308	0.0526686	0.408731	-0.176739	Keap1	kelch-like ECH-associated protein 1
3	ENSMUSG00000003309	-0.740858	-0.0575929	-0.132426	Ap1m2	adaptor protein complex AP-1, mu 2 subunit
9	ENSMUSG00000003316	-0.227552	0.136328	-0.0901389	Glg1	golgi apparatus protein 1
15	ENSMUSG00000003341	-0.116992	0.278463	0.716993	Atp8b3	ATPase, class I, type 8B, member 3
7	ENSMUSG00000003344	-0.0238961	0.378053	-0.213591	Btbd2	BTB (POZ) domain containing 2
5	ENSMUSG00000003345	-0.162161	0.220372	-0.296373	Csnk1g2	casein kinase 1, gamma 2
5	ENSMUSG00000003346	-0.216446	0.234963	-0.525434	Abhd17a	abhydrolase domain containing 17A
9	ENSMUSG00000003348	-0.284778	0.118001	-0.184789	Mob3a	MOB kinase activator 3A
1	ENSMUSG00000003352	0.0841559	0.00503287	-0.328709	Cacnb3	calcium channel, voltage-dependent, beta 3 subunit
13	ENSMUSG00000003354	-0.6	-0.4	0.2	Ccdc65	coiled-coil domain containing 65
2	ENSMUSG00000003355	-0.109914	0.602079	-0.668958	Fkbp11	FK506 binding protein 11
9	ENSMUSG00000003360	-0.169143	0.145081	-0.18116	Ddx23	DEAD box helicase 23
7	ENSMUSG00000003363	-0.0482955	0.204809	-0.125238	Pld3	phospholipase D family, member 3
5	ENSMUSG00000003378	-0.0920462	0.104966	-0.385709	Grik5	glutamate receptor, ionotropic, kainate 5 (gamma 2)
5	ENSMUSG00000003379	-0.210548	0.244506	-0.275922	Cd79a	CD79A antigen (immunoglobulin-associated alpha)
5	ENSMUSG00000003380	-0.316455	0.116772	-0.51273	Rabac1	Rab acceptor 1 (prenylated)
9	ENSMUSG00000003382	-0.275022	0.299324	-0.14347	Etv3	ets variant 3
5	ENSMUSG00000003402	0.0204844	0.146441	-0.221478	Prkcsh	protein kinase C substrate 80K-H
9	ENSMUSG00000003410	-0.2	0	-0.233985	Elavl3	ELAV like RNA binding protein 3
8	ENSMUSG00000003411	-0.2	-0.2	-0.6	Rab3b	RAB3B, member RAS oncogene family
9	ENSMUSG00000003418	-0.36488	0.307488	-0.320656	St8sia6	ST8 alpha-N-acetyl-neuraminide alpha-2,8-sialyltransferase 6
9	ENSMUSG00000003420	-0.136694	0.17139	-0.141817	Fcgrt	Fc fragment of IgG receptor and transporter
7	ENSMUSG00000003421	-0.011353	0.236986	-0.194657	Nosip	nitric oxide synthase interacting protein
5	ENSMUSG00000003423	-0.0521802	0.212145	-0.294448	Pih1d1	PIH1 domain containing 1
5	ENSMUSG00000003429	-0.0833986	0.341617	-0.265039	Rps11	ribosomal protein S11
9	ENSMUSG00000003435	-0.16964	0.193908	-0.157784	Supt5	suppressor of Ty 5, DSIF elongation factor subunit
12	ENSMUSG00000003436	0.316993	0.316993	0.2	Dll3	delta like canonical Notch ligand 3
9	ENSMUSG00000003437	-0.327989	0.175664	-0.221161	Paf1	Paf1, RNA polymerase II complex component
1	ENSMUSG00000003438	0.0166611	0.136027	-0.241181	Timm50	translocase of inner mitochondrial membrane 50
5	ENSMUSG00000003444	-0.2719	0.404641	-0.282618	Med29	mediator complex subunit 29
9	ENSMUSG00000003452	-0.37703	0.203216	-0.137967	Bicd1	BICD cargo adaptor 1
7	ENSMUSG00000003458	-0.0511123	0.179404	-0.191229	Ncstn	nicastrin
5	ENSMUSG00000003464	-0.0506448	0.206602	-0.220987	Pex19	peroxisomal biogenesis factor 19
4	ENSMUSG00000003469	0.402179	-1.04534	0.0937848	Phyhip	phytanoyl-CoA hydroxylase interacting protein
10	ENSMUSG00000003476	0.2	0	0	Crhr2	corticotropin releasing hormone receptor 2
10	ENSMUSG00000003477	0	0	0	Inmt	indolethylamine N-methyltransferase
9	ENSMUSG00000003484	-0.377045	0.16036	-0.443144	Cyp4f18	cytochrome P450, family 4, subfamily f, polypeptide 18
5	ENSMUSG00000003500	-0.150552	0.172084	-0.455007	Impdh1	inosine monophosphate dehydrogenase 1
10	ENSMUSG00000003505	0	0	0	Psg18	pregnancy specific beta-1-glycoprotein 18
9	ENSMUSG00000003518	-0.336726	0.160069	-0.143107	Dusp3	dual specificity phosphatase 3 (vaccinia virus phosphatase VH1-related)
5	ENSMUSG00000003526	0.0229477	0.137534	-0.32942	Prodh	proline dehydrogenase
5	ENSMUSG00000003527	-0.0287614	0.282289	-0.481849	Ess2	ess-2 splicing factor
5	ENSMUSG00000003528	0.0362776	0.243332	-0.241847	Slc25a1	solute carrier family 25 (mitochondrial carrier, citrate transporter), member 1
5	ENSMUSG00000003531	-0.0235848	0.307863	-0.508343	Dgcr6	DiGeorge syndrome critical region gene 6
5	ENSMUSG00000003534	-0.0444994	0.336169	-0.248734	Ddr1	discoidin domain receptor family, member 1
3	ENSMUSG00000003541	-0.609587	-0.128914	-0.275501	Ier3	immediate early response 3
15	ENSMUSG00000003545	-0.470408	-0.214861	0.565055	Fosb	FBJ osteosarcoma oncogene B
1	ENSMUSG00000003546	-0.139109	-0.0246678	-0.226094	Klc4	kinesin light chain 4
9	ENSMUSG00000003549	-0.281464	0.0301726	-0.252559	Ercc1	excision repair cross-complementing rodent repair deficiency, complementation group 1
8	ENSMUSG00000003555	-0.516992	0.116992	-0.664386	Cyp17a1	cytochrome P450, family 17, subfamily a, polypeptide 1
5	ENSMUSG00000003559	-0.218764	0.352051	-0.236317	As3mt	arsenite methyltransferase
10	ENSMUSG00000003573	0.0147233	0.0969948	-0.141843	Homer3	homer scaffolding protein 3
5	ENSMUSG00000003575	-0.0944732	0.206544	-0.299194	Crtc1	CREB regulated transcription coactivator 1
5	ENSMUSG00000003581	-0.198189	0.188797	-0.389091	Rnf215	ring finger protein 215
4	ENSMUSG00000003585	0.18791	-0.5079	0.142665	Sec14l2	SEC14-like lipid binding 2
8	ENSMUSG00000003604	-0.452551	-0.0420478	-0.407929	Aven	apoptosis, caspase activation inhibitor
9	ENSMUSG00000003617	-0.198897	0.267442	-0.107132	Cp	ceruloplasmin
9	ENSMUSG00000003623	-0.25759	0.105317	-0.310214	Crot	carnitine O-octanoyltransferase
7	ENSMUSG00000003644	-0.00558703	0.236332	-0.184233	Rps6ka1	ribosomal protein S6 kinase polypeptide 1
12	ENSMUSG00000003657	0.316993	0	0	Calb2	calbindin 2
7	ENSMUSG00000003660	-0.112821	0.271814	-0.0625427	Snrnp200	small nuclear ribonucleoprotein 200 (U5)
9	ENSMUSG00000003662	-0.242644	0.219391	-0.238807	Ciao1	cytosolic iron-sulfur protein assembly 1
2	ENSMUSG00000003665	-0.2	0.147393	-1.10596	Has1	hyaluronan synthase 1
9	ENSMUSG00000003680	-0.3906	0.271207	-0.0144812	Taf6l	TATA-box binding protein associated factor 6 like
9	ENSMUSG00000003721	-0.297396	0.0788327	-0.255392	Insig2	insulin induced gene 2
7	ENSMUSG00000003731	-0.0653109	0.20872	-0.150188	Kpna6	karyopherin (importin) alpha 6
9	ENSMUSG00000003746	-0.259833	0.257001	-0.219208	Man1a	mannosidase 1, alpha
9	ENSMUSG00000003752	-0.441146	0.248221	-0.222627	Itpkc	inositol 1,4,5-trisphosphate 3-kinase C
9	ENSMUSG00000003762	-0.152593	0.175518	-0.107054	Coq8b	coenzyme Q8B
9	ENSMUSG00000003778	-0.237816	0.190181	-0.117453	Brd8	bromodomain containing 8
7	ENSMUSG00000003779	0.158933	0.226768	-0.0369213	Kif20a	kinesin family member 20A
5	ENSMUSG00000003808	-0.074733	0.29837	-0.269088	Farsa	phenylalanyl-tRNA synthetase, alpha subunit
10	ENSMUSG00000003809	0.0860241	-0.110804	-0.0562585	Gcdh	glutaryl-Coenzyme A dehydrogenase
10	ENSMUSG00000003810	0.0526589	0.143717	-0.0396131	Mast2	microtubule associated serine/threonine kinase 2
9	ENSMUSG00000003812	-0.276441	0.069405	-0.283985	Dnase2a	deoxyribonuclease II alpha
10	ENSMUSG00000003813	0.195807	-0.200116	-0.0603321	Rad23a	RAD23 homolog A, nucleotide excision repair protein
10	ENSMUSG00000003814	-0.0175098	0.128709	-0.062393	Calr	calreticulin
13	ENSMUSG00000003824	-0.212999	-0.30088	-0.122795	Syce2	synaptonemal complex central element protein 2
9	ENSMUSG00000003847	-0.372558	0.193239	-0.12501	Nfat5	nuclear factor of activated T cells 5
5	ENSMUSG00000003848	-0.209162	0.278224	-0.317684	Nob1	NIN1/RPN12 binding protein 1 homolog
10	ENSMUSG00000003849	0.138871	-0.134668	0.00724382	Nqo1	NAD(P)H dehydrogenase, quinone 1
14	ENSMUSG00000003863	-0.316993	0.947393	0.297085	Ppfia3	protein tyrosine phosphatase, receptor type, f polypeptide (PTPRF), interacting protein (liprin), alpha 3
7	ENSMUSG00000003865	-0.129007	0.304322	-0.126763	Gys1	glycogen synthase 1, muscle
5	ENSMUSG00000003868	-0.10935	0.0909368	-0.284486	Ruvbl2	RuvB-like protein 2
2	ENSMUSG00000003872	-0.419907	0.2	-0.898371	Lin7b	lin-7 homolog B, crumbs cell polarity complex component
5	ENSMUSG00000003873	0.0094471	0.426947	-0.352648	Bax	BCL2-associated X protein
8	ENSMUSG00000003882	-0.604251	-0.0238186	-0.439713	Il7r	interleukin 7 receptor
9	ENSMUSG00000003923	-0.367398	0.287814	-0.19127	Tfam	transcription factor A, mitochondrial
9	ENSMUSG00000003929	-0.406789	0.195023	-0.144656	Zfp81	zinc finger protein 81
1	ENSMUSG00000003934	0.0288293	0.0794231	-0.424808	Efnb3	ephrin B3
9	ENSMUSG00000003948	-0.122355	0.180747	-0.211586	Mmd	monocyte to macrophage differentiation-associated
1	ENSMUSG00000003949	0.263663	0.107713	-0.353128	Hlf	hepatic leukemia factor
5	ENSMUSG00000003955	-0.186398	0.100755	-0.366629	Fam162a	family with sequence similarity 162, member A
5	ENSMUSG00000003970	-0.118065	0.267637	-0.358203	Rpl8	ribosomal protein L8
10	ENSMUSG00000003974	0	0	0	Grm3	glutamate receptor, metabotropic 3
9	ENSMUSG00000003992	-0.29535	-0.0475507	-0.0506405	Ssbp2	single-stranded DNA binding protein 2
1	ENSMUSG00000004018	-0.0954831	0.0691936	-0.219559	Fancl	Fanconi anemia, complementation group L
2	ENSMUSG00000004031	-0.151937	0.264386	-0.669585	Brinp2	bone morphogenic protein/retinoic acid inducible neural-specific 2
13	ENSMUSG00000004032	-0.000316194	-0.433267	-0.046742	Gstm5	glutathione S-transferase, mu 5
13	ENSMUSG00000004035	-0.357887	-0.102915	0.193157	Gstm7	glutathione S-transferase, mu 7
10	ENSMUSG00000004038	0	0	0	Gstm3	glutathione S-transferase, mu 3
7	ENSMUSG00000004040	-0.158712	0.32623	-0.136083	Stat3	signal transducer and activator of transcription 3
9	ENSMUSG00000004043	-0.0802627	0.159645	-0.1736	Stat5a	signal transducer and activator of transcription 5A
1	ENSMUSG00000004044	-0.120556	-0.031676	-0.227651	Cavin1	caveolae associated 1
5	ENSMUSG00000004054	-0.20463	0.209403	-0.335934	Map3k11	mitogen-activated protein kinase kinase kinase 11
5	ENSMUSG00000004056	-0.122092	0.223537	-0.344663	Akt2	thymoma viral proto-oncogene 2
9	ENSMUSG00000004069	-0.183898	0.161861	-0.229367	Dnaja3	DnaJ heat shock protein family (Hsp40) member A3
7	ENSMUSG00000004070	-0.0742786	0.393162	-0.178201	Hmox2	heme oxygenase 2
9	ENSMUSG00000004071	-0.242715	0.319605	-0.211605	Cdip1	cell death inducing Trp53 target 1
9	ENSMUSG00000004085	-0.287729	0.161356	-0.0455986	Map3k20	mitogen-activated protein kinase kinase kinase 20
5	ENSMUSG00000004096	-0.107906	0.244332	-0.229332	Cwc15	CWC15 spliceosome-associated protein
7	ENSMUSG00000004098	0.141328	0.295609	-0.0911359	Col5a3	collagen, type V, alpha 3
7	ENSMUSG00000004099	0.104742	0.299544	0.0424514	Dnmt1	DNA methyltransferase (cytosine-5) 1
5	ENSMUSG00000004100	-0.177258	0.242487	-0.414142	Ppan	peter pan homolog
1	ENSMUSG00000004105	-0.0320594	0.0495637	-0.215153	Angptl2	angiopoietin-like 2
8	ENSMUSG00000004110	-0.714886	-0.10357	-0.549095	Cacna1e	calcium channel, voltage-dependent, R type, alpha 1E subunit
7	ENSMUSG00000004113	0.0488312	0.366314	-0.205027	Cacna1b	calcium channel, voltage-dependent, N type, alpha 1B subunit
9	ENSMUSG00000004127	-0.242418	0.265014	-0.0897408	Trmt10a	tRNA methyltransferase 10A
9	ENSMUSG00000004151	-0.312981	0.273868	-0.0261264	Etv1	ets variant 1
9	ENSMUSG00000004187	-0.311456	0.0197166	-0.339067	Kifc2	kinesin family member C2
7	ENSMUSG00000004207	0.0127333	0.386764	-0.0876174	Psap	prosaposin
5	ENSMUSG00000004221	-0.153692	0.271501	-0.256724	Ikbkg	inhibitor of kappaB kinase gamma
9	ENSMUSG00000004231	-0.2	0	-0.2	Pax2	paired box 2
9	ENSMUSG00000004233	-0.269016	0.204479	-0.281982	Wars2	tryptophanyl tRNA synthetase 2 (mitochondrial)
9	ENSMUSG00000004263	-0.163518	0.157206	-0.144189	Atn1	atrophin 1
5	ENSMUSG00000004264	-0.0835118	0.193067	-0.283232	Phb2	prohibitin 2
9	ENSMUSG00000004266	-0.157907	0.2309	-0.142893	Ptpn6	protein tyrosine phosphatase, non-receptor type 6
5	ENSMUSG00000004267	-0.034912	0.193743	-0.408919	Eno2	enolase 2, gamma neuronal
5	ENSMUSG00000004268	-0.198229	0.195326	-0.396642	Emg1	EMG1 N1-specific pseudouridine methyltransferase
10	ENSMUSG00000004270	0.0683849	0.0134292	-0.133125	Lpcat3	lysophosphatidylcholine acyltransferase 3
5	ENSMUSG00000004285	-0.142841	0.343214	-0.345684	Atp6v1f	ATPase, H+ transporting, lysosomal V1 subunit F
14	ENSMUSG00000004296	0.116337	0.73107	0.233985	Il12b	interleukin 12b
9	ENSMUSG00000004317	-0.312357	0.229618	-0.202904	Clcn5	chloride channel, voltage-sensitive 5
10	ENSMUSG00000004319	0.0543089	0.00561717	-0.130989	Clcn3	chloride channel, voltage-sensitive 3
7	ENSMUSG00000004328	-0.024951	0.378617	-0.101841	Hif3a	hypoxia inducible factor 3, alpha subunit
10	ENSMUSG00000004341	0	0	0.2	Gpx6	glutathione peroxidase 6
9	ENSMUSG00000004344	-0.316993	0	0	Gpx5	glutathione peroxidase 5
3	ENSMUSG00000004347	-0.804986	0.223226	-0.301629	Pde1c	phosphodiesterase 1C
9	ENSMUSG00000004356	-0.201673	0.24551	-0.16535	Utp20	UTP20 small subunit processome component
7	ENSMUSG00000004359	0.0103447	0.372075	-0.173424	Spic	Spi-C transcription factor (Spi-1/PU.1 related)
1	ENSMUSG00000004360	0	-0.2	-0.6	9330159F19Rik	RIKEN cDNA 9330159F19 gene
9	ENSMUSG00000004364	-0.227515	0.268264	-0.118852	Cul3	cullin 3
5	ENSMUSG00000004366	0	0.2	-0.316993	Sst	somatostatin
1	ENSMUSG00000004371	0	-0.316993	-0.433985	Il11	interleukin 11
9	ENSMUSG00000004383	-0.239258	0.153169	-0.0786725	Large1	LARGE xylosyl- and glucuronyltransferase 1
5	ENSMUSG00000004393	-0.0368945	0.349571	-0.297942	Ddx56	DEAD box helicase 56
9	ENSMUSG00000004394	-0.28013	0.268491	-0.276514	Tmed4	transmembrane p24 trafficking protein 4
10	ENSMUSG00000004415	0.038529	0.0140779	0.230401	Col26a1	collagen, type XXVI, alpha 1
7	ENSMUSG00000004446	-0.0397413	0.41602	-0.214273	Bid	BH3 interacting domain death agonist
5	ENSMUSG00000004451	-0.107047	0.219399	-0.193945	Ralb	v-ral simian leukemia viral oncogene B
9	ENSMUSG00000004455	-0.29091	0.0595349	-0.311245	Ppp1cc	protein phosphatase 1 catalytic subunit gamma
7	ENSMUSG00000004460	-0.0486115	0.143559	-0.165335	Dnajb11	DnaJ heat shock protein family (Hsp40) member B11
10	ENSMUSG00000004462	-0.0970225	0.0673132	-0.149537	Tbccd1	TBCC domain containing 1
5	ENSMUSG00000004473	-0.129912	0.166041	-0.370994	Clec11a	C-type lectin domain family 11, member a
7	ENSMUSG00000004500	0.0100846	0.152979	-0.0614779	Zfp324	zinc finger protein 324
7	ENSMUSG00000004508	0.110028	0.180281	-0.156782	Gab2	growth factor receptor bound protein 2-associated protein 2
7	ENSMUSG00000004530	-0.0603018	0.156705	-0.138648	Coro1c	coronin, actin binding protein 1C
9	ENSMUSG00000004535	-0.172917	0.21557	-0.140899	Tax1bp1	Tax1 (human T cell leukemia virus type I) binding protein 1
8	ENSMUSG00000004540	-0.6	-0.2	-0.8	Psg17	pregnancy specific beta-1-glycoprotein 17
10	ENSMUSG00000004542	0.2	0	0	Psg19	pregnancy specific beta-1-glycoprotein 19
10	ENSMUSG00000004552	0.147127	-0.197336	0.080697	Ctse	cathepsin E
5	ENSMUSG00000004558	-0.116074	0.112722	-0.385773	Ndrg2	N-myc downstream regulated gene 2
5	ENSMUSG00000004561	-0.320437	0.0799016	-0.472493	Mettl17	methyltransferase like 17
10	ENSMUSG00000004562	-0.143785	-0.00442944	-0.0902141	Arhgef40	Rho guanine nucleotide exchange factor (GEF) 40
9	ENSMUSG00000004565	-0.0975792	0.170188	-0.171375	Pnpla6	patatin-like phospholipase domain containing 6
9	ENSMUSG00000004567	-0.16403	0.102166	-0.293234	Mcoln1	mucolipin 1
9	ENSMUSG00000004568	-0.359936	0.174911	-0.323942	Arhgef18	rho/rac guanine nucleotide exchange factor (GEF) 18
9	ENSMUSG00000004591	-0.138876	0.14526	-0.0529721	Pkn2	protein kinase N2
7	ENSMUSG00000004609	0.0159757	0.146878	-0.191684	Cd33	CD33 molecule
5	ENSMUSG00000004610	0.00098718	0.212427	-0.372061	Etfb	electron transferring flavoprotein, beta polypeptide
6	ENSMUSG00000004612	0.270489	0.632122	-0.287397	Nkg7	natural killer cell group 7 sequence
10	ENSMUSG00000004613	0	0	0	No associated gene
9	ENSMUSG00000004626	-0.153299	0.264162	-0.189342	Stxbp2	syntaxin binding protein 2
9	ENSMUSG00000004630	-0.37838	-0.0240755	0.0100416	Pcp2	Purkinje cell protein 2 (L7)
1	ENSMUSG00000004631	-0.055967	0.0486293	-0.225711	Sgce	sarcoglycan, epsilon
9	ENSMUSG00000004633	-0.215501	0.117	-0.100117	Chn2	chimerin 2
9	ENSMUSG00000004637	-0.405527	0.465904	-0.0664861	Wwox	WW domain-containing oxidoreductase
10	ENSMUSG00000004642	-0.0855165	0.0346757	-0.107408	Slbp	stem-loop binding protein
7	ENSMUSG00000004651	0	0.4	0	Tyr	tyrosinase
12	ENSMUSG00000004654	0.6	0.2	-0.0830075	Ghrhr	growth hormone releasing hormone receptor
4	ENSMUSG00000004655	0.257316	-0.641479	0.0902405	Aqp1	aquaporin 1
9	ENSMUSG00000004661	-0.281764	0.32048	-0.199155	Arid3b	AT rich interactive domain 3B (BRIGHT-like)
5	ENSMUSG00000004665	-0.192129	0.272333	-0.287742	Cnn2	calponin 2
9	ENSMUSG00000004667	-0.241039	0.0788213	-0.325683	Polr2e	polymerase (RNA) II (DNA directed) polypeptide E
6	ENSMUSG00000004668	0.802618	0.580577	0.113563	Abca13	ATP-binding cassette, sub-family A (ABC1), member 13
9	ENSMUSG00000004677	-0.173614	0.221164	-0.104447	Myo9b	myosin IXb
14	ENSMUSG00000004698	-0.381594	0.630969	-0.360017	Hdac9	histone deacetylase 9
7	ENSMUSG00000004707	-0.00142679	0.363253	-0.15786	Ly9	lymphocyte antigen 9
7	ENSMUSG00000004709	0.0197951	0.527038	-0.035977	Cd244a	CD244 molecule A
7	ENSMUSG00000004730	-0.0528543	0.233254	0.0961535	Adgre1	adhesion G protein-coupled receptor E1
5	ENSMUSG00000004748	0.0225729	0.273964	-0.353325	Mtfp1	mitochondrial fission process 1
9	ENSMUSG00000004768	-0.232109	0.259831	-0.18824	Rab23	RAB23, member RAS oncogene family
5	ENSMUSG00000004771	-0.104156	0.205735	-0.288074	Rab11a	RAB11A, member RAS oncogene family
5	ENSMUSG00000004788	-0.0660583	0.357312	-0.265528	Eif2b2	eukaryotic translation initiation factor 2B, subunit 2 beta
9	ENSMUSG00000004789	-0.163688	0.130305	-0.199503	Dlst	dihydrolipoamide S-succinyltransferase (E2 component of 2-oxo-glutarate complex)
2	ENSMUSG00000004791	-0.657901	0.570489	-0.769599	Pgf	placental growth factor
9	ENSMUSG00000004798	-0.289993	0.216405	-0.0203925	Ulk2	unc-51 like kinase 2
13	ENSMUSG00000004814	-0.602178	-0.303804	0.185258	Ccl24	chemokine (C-C motif) ligand 24
5	ENSMUSG00000004815	-0.173567	0.223979	-0.275471	Dgkq	diacylglycerol kinase, theta
2	ENSMUSG00000004821	-0.2	0.2	-0.864386	Tmed11	transmembrane p24 trafficking protein 11
9	ENSMUSG00000004837	-0.200617	0.227223	-0.261101	Grap	GRB2-related adaptor protein
12	ENSMUSG00000004842	0.516992	0.116992	0.033985	Pou1f1	POU domain, class 1, transcription factor 1
9	ENSMUSG00000004843	-0.409547	0.048793	-0.2118	Chmp2b	charged multivesicular body protein 2B
5	ENSMUSG00000004846	-0.126294	0.222373	-0.263702	Plod3	procollagen-lysine, 2-oxoglutarate 5-dioxygenase 3
5	ENSMUSG00000004849	-0.0533204	0.24928	-0.317707	Ap1s1	adaptor protein complex AP-1, sigma 1
10	ENSMUSG00000004864	0.222321	0.0526826	-0.0118287	Mapk13	mitogen-activated protein kinase 13
9	ENSMUSG00000004865	-0.272426	0.165946	-0.189323	Srpk1	serine/arginine-rich protein specific kinase 1
14	ENSMUSG00000004872	-0.2	0.6	0	Pax3	paired box 3
10	ENSMUSG00000004880	-0.115151	0.0807644	-0.0739175	Lbr	lamin B receptor
10	ENSMUSG00000004885	0	0	0.2	Crabp2	cellular retinoic acid binding protein II
5	ENSMUSG00000004891	-0.274692	0.100053	-0.533505	Nes	nestin
1	ENSMUSG00000004892	0	0	-0.2	Bcan	brevican
1	ENSMUSG00000004894	0	0	-0.2	Hapln2	hyaluronan and proteoglycan link protein 2
9	ENSMUSG00000004895	-0.175972	0.229892	-0.196911	Prcc	papillary renal cell carcinoma (translocation-associated)
5	ENSMUSG00000004896	-0.276373	0.255871	-0.413101	Mettl25b	methyltransferase like 25B
1	ENSMUSG00000004897	-0.162172	-0.033005	-0.220105	Hdgf	heparin binding growth factor
8	ENSMUSG00000004902	-0.284652	-0.284057	-0.47212	Slc25a18	solute carrier family 25 (mitochondrial carrier), member 18
5	ENSMUSG00000004929	0.095407	0.349733	-0.271673	Thop1	thimet oligopeptidase 1
7	ENSMUSG00000004931	-0.0230489	0.181083	-0.188484	Apba3	amyloid beta (A4) precursor protein-binding, family A, member 3
9	ENSMUSG00000004933	-0.357108	0.141766	-0.395286	Matk	megakaryocyte-associated tyrosine kinase
5	ENSMUSG00000004934	-0.177286	0.201357	-0.294833	Pias4	protein inhibitor of activated STAT 4
5	ENSMUSG00000004936	-0.138741	0.306468	-0.196667	Map2k1	mitogen-activated protein kinase kinase 1
5	ENSMUSG00000004937	-0.145128	0.282447	-0.220447	Sgta	small glutamine-rich tetratricopeptide repeat (TPR)-containing, alpha
12	ENSMUSG00000004939	0.2	-0.302915	0.347393	Nmrk2	nicotinamide riboside kinase 2
5	ENSMUSG00000004945	-0.0832893	0.467371	-0.36148	Tmem242	transmembrane protein 242
5	ENSMUSG00000004947	-0.124195	0.267935	-0.343334	Dtx2	deltex 2, E3 ubiquitin ligase
1	ENSMUSG00000004948	0	0	-0.2	Zp3	zona pellucida glycoprotein 3
13	ENSMUSG00000004951	-0.303453	-0.674706	-0.117585	Hspb1	heat shock protein 1
5	ENSMUSG00000004952	0.00538295	0.369868	-0.299972	Rasa4	RAS p21 protein activator 4
8	ENSMUSG00000004961	-0.316993	-0.116992	-0.516992	Syt5	synaptotagmin V
9	ENSMUSG00000004980	-0.243603	0.153505	-0.203005	Hnrnpa2b1	heterogeneous nuclear ribonucleoprotein A2/B1
1	ENSMUSG00000004988	-0.0865919	-0.135614	-0.381378	Fxyd4	FXYD domain-containing ion transport regulator 4
9	ENSMUSG00000004994	-0.182337	0.216097	-0.218238	Yju2b	YJU2 splicing factor homolog B
5	ENSMUSG00000004996	-0.017154	0.312727	-0.434734	Mri1	methylthioribose-1-phosphate isomerase 1
9	ENSMUSG00000005034	-0.228776	0.241913	-0.150796	Prkacb	protein kinase, cAMP dependent, catalytic, beta
9	ENSMUSG00000005043	-0.377818	0.308031	-0.291608	Sgsh	N-sulfoglucosamine sulfohydrolase (sulfamidase)
8	ENSMUSG00000005045	-0.4	-0.388221	-0.411779	Chd5	chromodomain helicase DNA binding protein 5
5	ENSMUSG00000005054	-0.0834783	0.358884	-0.397316	Cstb	cystatin B
5	ENSMUSG00000005057	-0.058276	0.475157	-0.37862	Sh2b2	SH2B adaptor protein 2
9	ENSMUSG00000005069	-0.178041	0.163828	-0.253311	Pex5	peroxisomal biogenesis factor 5
5	ENSMUSG00000005078	-0.290222	0.322336	-0.411539	Jkamp	JNK1/MAPK8-associated membrane protein
9	ENSMUSG00000005087	-0.167656	0.294824	-0.166919	Cd44	CD44 antigen
9	ENSMUSG00000005089	-0.475526	0.481909	-0.18172	Slc1a2	solute carrier family 1 (glial high affinity glutamate transporter), member 2
9	ENSMUSG00000005102	-0.242345	0.255821	-0.151884	Eif2ak4	eukaryotic translation initiation factor 2 alpha kinase 4
9	ENSMUSG00000005103	-0.164005	0.251165	-0.206427	Wdr1	WD repeat domain 1
8	ENSMUSG00000005107	-0.451606	0.0764937	-0.51413	Slc2a9	solute carrier family 2 (facilitated glucose transporter), member 9
7	ENSMUSG00000005124	0.145849	0.183883	0.0757901	Ccn4	cellular communication network factor 4
9	ENSMUSG00000005125	-0.218791	0.149433	-0.103251	Ndrg1	N-myc downstream regulated gene 1
8	ENSMUSG00000005131	-0.0599121	-0.102915	-0.796345	4930550C14Rik	RIKEN cDNA 4930550C14 gene
9	ENSMUSG00000005142	-0.211517	0.160155	-0.142308	Man2b1	mannosidase 2, alpha B1
12	ENSMUSG00000005148	0.465433	-0.194359	0.269718	Klf5	Kruppel-like transcription factor 5
5	ENSMUSG00000005150	-0.185901	0.186734	-0.394315	Wdr83	WD repeat domain containing 83
4	ENSMUSG00000005161	0.206506	-0.499428	0.0293442	Prdx2	peroxiredoxin 2
7	ENSMUSG00000005198	-0.0792189	0.238912	0.013406	Polr2a	polymerase (RNA) II (DNA directed) polypeptide A
10	ENSMUSG00000005202	0	0	0	Shbg	sex hormone binding globulin
9	ENSMUSG00000005204	-0.121811	0.0897012	-0.202671	Senp3	SUMO/sentrin specific peptidase 3
3	ENSMUSG00000005220	-0.762948	0.210187	-0.23333	Corin	corin, serine peptidase
9	ENSMUSG00000005225	-0.406821	0.34824	-0.0353083	Plekha8	pleckstrin homology domain containing, family A (phosphoinositide binding specific) member 8
10	ENSMUSG00000005232	0	0	0	G6pc2	glucose-6-phosphatase, catalytic, 2
12	ENSMUSG00000005233	0.368566	0.0255507	0.110139	Spc25	SPC25, NDC80 kinetochore complex component, homolog (S. cerevisiae)
8	ENSMUSG00000005237	-0.286468	-0.311962	-0.578176	Dnah2	dynein, axonemal, heavy chain 2
8	ENSMUSG00000005251	-0.815363	-0.502915	-0.574894	Ripk4	receptor-interacting serine-threonine kinase 4
9	ENSMUSG00000005262	-0.230863	0.145284	-0.200104	Ufd1	ubiquitin recognition factor in ER-associated degradation 1
9	ENSMUSG00000005267	-0.330327	0.218607	-0.0942774	Zfp287	zinc finger protein 287
7	ENSMUSG00000005268	-0.120062	0.408353	-0.165728	Prlr	prolactin receptor
5	ENSMUSG00000005299	-0.0540877	0.208123	-0.282853	Letm1	leucine zipper-EF-hand containing transmembrane protein 1
9	ENSMUSG00000005312	-0.27766	0.157213	-0.00506934	Ubqln1	ubiquilin 1
13	ENSMUSG00000005320	-0.195566	-0.254777	0.0393567	Fgfr4	fibroblast growth factor receptor 4
7	ENSMUSG00000005338	-0.125484	0.240828	-0.0683548	Cadm3	cell adhesion molecule 3
13	ENSMUSG00000005339	-0.664386	-0.950978	0.250308	Fcer1a	Fc receptor, IgE, high affinity I, alpha polypeptide
5	ENSMUSG00000005354	-0.0506053	0.116524	-0.352242	Txn2	thioredoxin 2
10	ENSMUSG00000005355	0	0	0	Casp14	caspase 14
13	ENSMUSG00000005357	-0.4	-0.2	0.2	Slc1a6	solute carrier family 1 (high affinity aspartate/glutamate transporter), member 6
7	ENSMUSG00000005360	-0.155341	0.312884	0.0232705	Slc1a3	solute carrier family 1 (glial high affinity glutamate transporter), member 3
9	ENSMUSG00000005362	-0.211662	0.22137	-0.239514	Crbn	cereblon
10	ENSMUSG00000005364	-0.113634	0.143944	0.100822	Il5ra	interleukin 5 receptor, alpha
9	ENSMUSG00000005370	-0.215035	0.229281	-0.123775	Msh6	mutS homolog 6
9	ENSMUSG00000005371	-0.418018	0.150744	-0.244979	Fbxo11	F-box protein 11
10	ENSMUSG00000005373	-0.116992	0.0830075	0.180093	Mlxipl	MLX interacting protein-like
9	ENSMUSG00000005374	-0.202149	0.185959	-0.197321	Tbl2	transducin (beta)-like 2
5	ENSMUSG00000005378	-0.140031	0.175476	-0.312133	Bud23	BUD23, rRNA methyltransferase and ribosome maturation factor
10	ENSMUSG00000005397	-0.106291	0.0129464	-0.0502021	Nid1	nidogen 1
7	ENSMUSG00000005410	0.186592	0.181387	-0.073595	Mcm5	minichromosome maintenance complex component 5
7	ENSMUSG00000005413	-0.0330938	0.304947	-0.129764	Hmox1	heme oxygenase 1
9	ENSMUSG00000005417	-0.214387	0.107906	-0.164779	Mprip	myosin phosphatase Rho interacting protein
9	ENSMUSG00000005442	-0.172949	0.187096	-0.182568	Cic	capicua transcriptional repressor
7	ENSMUSG00000005447	0.0688435	0.418962	-0.145328	Pafah1b3	platelet-activating factor acetylhydrolase, isoform 1b, subunit 3
9	ENSMUSG00000005465	-0.337023	0.100135	-0.298425	Il27ra	interleukin 27 receptor, alpha
9	ENSMUSG00000005469	-0.146531	0.204974	-0.10134	Prkaca	protein kinase, cAMP dependent, catalytic, alpha
12	ENSMUSG00000005470	0.443228	0.0828687	0.0720687	Asf1b	anti-silencing function 1B histone chaperone
5	ENSMUSG00000005474	0	0.2	-0.316993	Myl10	myosin, light chain 10, regulatory
9	ENSMUSG00000005481	-0.225413	0.236042	-0.239827	Ddx39a	DEAD box helicase 39a
9	ENSMUSG00000005483	-0.273139	0.175151	-0.222735	Dnajb1	DnaJ heat shock protein family (Hsp40) member B1
10	ENSMUSG00000005493	0	-0.2	0	Msh4	mutS homolog 4
9	ENSMUSG00000005501	-0.247965	0.108745	-0.306469	Usp40	ubiquitin specific peptidase 40
10	ENSMUSG00000005503	0	0	0	Evx1	even-skipped homeobox 1
9	ENSMUSG00000005505	-0.249574	0.268293	-0.220238	Kbtbd4	kelch repeat and BTB (POZ) domain containing 4
9	ENSMUSG00000005506	-0.309501	0.17153	-0.220182	Celf1	CUGBP, Elav-like family member 1
5	ENSMUSG00000005510	-0.236243	0.175496	-0.419479	Ndufs3	NADH:ubiquinone oxidoreductase core subunit S3
7	ENSMUSG00000005514	-0.0970617	0.310637	-0.10413	Por	cytochrome p450 oxidoreductase
10	ENSMUSG00000005533	-0.179868	-0.0630752	0.0285584	Igf1r	insulin-like growth factor I receptor
9	ENSMUSG00000005534	-0.386801	0.189162	-0.138185	Insr	insulin receptor
9	ENSMUSG00000005540	-0.475841	-0.0234433	-0.294344	Fcer2a	Fc receptor, IgE, low affinity II, alpha polypeptide
10	ENSMUSG00000005547	0	0	0	Cyp2a5	cytochrome P450, family 2, subfamily a, polypeptide 5
13	ENSMUSG00000005553	-0.166015	-0.4631	-0.225857	Atp4a	ATPase, H+/K+ exchanging, gastric, alpha polypeptide
9	ENSMUSG00000005566	-0.108758	0.163114	-0.208705	Trim28	tripartite motif-containing 28
9	ENSMUSG00000005575	-0.149723	0.190666	-0.221064	Ube2m	ubiquitin-conjugating enzyme E2M
5	ENSMUSG00000005580	-0.114051	0.225341	-0.290923	Adcy9	adenylate cyclase 9
9	ENSMUSG00000005583	-0.266215	0.236021	-0.130956	Mef2c	myocyte enhancer factor 2C
9	ENSMUSG00000005609	-0.229413	0.0979714	-0.214542	Ctr9	CTR9 homolog, Paf1/RNA polymerase II complex component
9	ENSMUSG00000005610	-0.320202	0.223047	-0.173583	Eif4g2	eukaryotic translation initiation factor 4, gamma 2
7	ENSMUSG00000005611	0.132645	0.279771	-0.160262	Irag1	inositol 1,4,5-triphosphate receptor associated 1
10	ENSMUSG00000005615	-0.0625412	-0.0324078	-0.0622416	Pcyt1a	phosphate cytidylyltransferase 1, choline, alpha isoform
9	ENSMUSG00000005621	-0.272562	0.217601	-0.178956	Zfp592	zinc finger protein 592
5	ENSMUSG00000005625	-0.119441	0.15707	-0.338308	Psmd4	proteasome (prosome, macropain) 26S subunit, non-ATPase, 4
9	ENSMUSG00000005628	-0.532045	-0.0149768	-0.232967	Tmod4	tropomodulin 4
12	ENSMUSG00000005640	0.385922	0.1644	-0.237173	Insrr	insulin receptor-related receptor
1	ENSMUSG00000005649	0	-0.2	-0.4	Cabp5	calcium binding protein 5
9	ENSMUSG00000005656	-0.209351	0.253411	-0.234029	Snx6	sorting nexin 6
7	ENSMUSG00000005667	0.0181024	0.193611	-0.0628897	Mthfd2	methylenetetrahydrofolate dehydrogenase (NAD+ dependent), methenyltetrahydrofolate cyclohydrolase
9	ENSMUSG00000005672	-0.355253	0.0836162	0.0481531	Kit	KIT proto-oncogene receptor tyrosine kinase
5	ENSMUSG00000005674	-0.0579595	0.121	-0.422849	Tomm40l	translocase of outer mitochondrial membrane 40-like
5	ENSMUSG00000005677	-0.084898	0.0839519	-0.426397	Nr1i3	nuclear receptor subfamily 1, group I, member 3
4	ENSMUSG00000005681	0.4	-0.4	-0.072514	Apoa2	apolipoprotein A-II
9	ENSMUSG00000005682	-0.223038	0.142508	-0.200126	Pan2	PAN2 poly(A) specific ribonuclease subunit
7	ENSMUSG00000005683	-0.137037	0.276107	-0.147507	Cs	citrate synthase
10	ENSMUSG00000005686	-0.178557	-0.0634828	-0.0335941	Ampd3	adenosine monophosphate deaminase 3
5	ENSMUSG00000005687	-0.228937	0.134793	-0.367179	Bcas2	BCAS2 pre-mRNA processing factor
5	ENSMUSG00000005696	-0.106818	0.256691	-0.383133	Sh2d1a	SH2 domain containing 1A
9	ENSMUSG00000005698	-0.187737	0.144859	-0.139501	Ctcf	CCCTC-binding factor
5	ENSMUSG00000005699	-0.0840277	0.136768	-0.246977	Pard6a	par-6 family cell polarity regulator alpha
1	ENSMUSG00000005705	0.0777131	0.0465846	-0.387466	Agrp	agouti related neuropeptide
13	ENSMUSG00000005716	-0.516992	-0.2	0.2	Pvalb	parvalbumin
9	ENSMUSG00000005718	-0.299189	0.0553823	-0.365426	Tfap4	transcription factor AP4
5	ENSMUSG00000005732	-0.0512564	0.235091	-0.247734	Ranbp1	RAN binding protein 1
9	ENSMUSG00000005763	-0.352102	0.217972	-0.319493	Cd247	CD247 antigen
9	ENSMUSG00000005774	-0.177275	0.3112	-0.13501	Rfx5	regulatory factor X, 5 (influences HLA class II expression)
5	ENSMUSG00000005779	-0.0973056	0.370635	-0.394465	Psmb4	proteasome (prosome, macropain) subunit, beta type 4
1	ENSMUSG00000005800	-0.169786	-0.0334549	-0.564203	Mmp8	matrix metallopeptidase 8
9	ENSMUSG00000005802	-0.434086	0.24405	-0.145392	Slc30a4	solute carrier family 30 (zinc transporter), member 4
9	ENSMUSG00000005803	-0.307311	0.116373	-0.354514	Sqor	sulfide quinone oxidoreductase
5	ENSMUSG00000005804	-0.154995	0.288351	-0.260395	Bloc1s6	biogenesis of lysosomal organelles complex-1, subunit 6, pallidin
9	ENSMUSG00000005813	-0.344712	0.233274	-0.255952	Metap1	methionyl aminopeptidase 1
5	ENSMUSG00000005823	-0.102182	0.221692	-0.229747	Gpr108	G protein-coupled receptor 108
9	ENSMUSG00000005824	-0.219291	0.174999	-0.279493	Tnfsf14	tumor necrosis factor (ligand) superfamily, member 14
7	ENSMUSG00000005836	-0.131209	0.231408	0.0875088	Gata6	GATA binding protein 6
9	ENSMUSG00000005846	-0.240191	0.161875	-0.285148	Rsl1d1	ribosomal L1 domain containing 1
4	ENSMUSG00000005864	0.033985	-0.516992	-0.433985	Cnga2	cyclic nucleotide gated channel alpha 2
9	ENSMUSG00000005871	-0.22652	0.256352	-0.109135	Apc	APC, WNT signaling pathway regulator
5	ENSMUSG00000005873	-0.20083	0.34614	-0.235566	Reep5	receptor accessory protein 5
9	ENSMUSG00000005881	-0.128376	0.218731	-0.179344	Ergic3	ERGIC and golgi 3
9	ENSMUSG00000005882	-0.211676	0.272384	-0.115197	Uqcc1	ubiquinol-cytochrome c reductase complex assembly factor 1
6	ENSMUSG00000005883	0.203905	0.875938	-0.249309	Spo11	SPO11 initiator of meiotic double stranded breaks
9	ENSMUSG00000005886	-0.290293	0.284253	-0.121866	Ncoa2	nuclear receptor coactivator 2
10	ENSMUSG00000005891	0	0	0	Prl4a1	prolactin family 4, subfamily a, member 1
10	ENSMUSG00000005892	0	0	0	Trh	thyrotropin releasing hormone
9	ENSMUSG00000005893	-0.307592	0.142013	-0.130302	Nr2c2	nuclear receptor subfamily 2, group C, member 2
9	ENSMUSG00000005897	-0.458427	0.0403963	-0.277028	Nr2c1	nuclear receptor subfamily 2, group C, member 1
7	ENSMUSG00000005899	9.78e-05	0.202349	-0.145377	Smpd4	sphingomyelin phosphodiesterase 4
9	ENSMUSG00000005907	-0.243178	0.267859	-0.0598985	Pex1	peroxisomal biogenesis factor 1
14	ENSMUSG00000005917	-0.433985	0.6	0.316993	Otx1	orthodenticle homeobox 1
9	ENSMUSG00000005936	-0.111051	0.169189	-0.184273	Kctd20	potassium channel tetramerisation domain containing 20
3	ENSMUSG00000005947	-0.583203	0.264199	-0.209527	Itgae	integrin alpha E, epithelial-associated
9	ENSMUSG00000005949	-0.237841	0.159158	-0.0992716	Ctns	cystinosis, nephropathic
3	ENSMUSG00000005950	-0.638447	0.473702	-0.109687	P2rx5	purinergic receptor P2X, ligand-gated ion channel, 5
5	ENSMUSG00000005951	0.135118	0.215488	-0.287895	Shpk	sedoheptulokinase
1	ENSMUSG00000005952	0	-0.116992	-0.4	Trpv1	transient receptor potential cation channel, subfamily V, member 1
10	ENSMUSG00000005958	-0.0384336	0.039812	-0.0518846	Ephb3	Eph receptor B3
9	ENSMUSG00000005968	-0.280281	0.128243	-0.24269	Tuft1	tuftelin 1
7	ENSMUSG00000005973	-0.0624309	0.289872	-0.163131	Rcn1	reticulocalbin 1
9	ENSMUSG00000005980	-0.352914	-0.0620462	-0.0195832	Dnase1	deoxyribonuclease I
9	ENSMUSG00000005981	-0.148485	0.183714	-0.159554	Trap1	TNF receptor-associated protein 1
5	ENSMUSG00000005982	-0.060884	0.211168	-0.19984	Naa60	N(alpha)-acetyltransferase 60, NatF catalytic subunit
9	ENSMUSG00000005983	-0.218562	0.163679	-0.261566	1700037C18Rik	RIKEN cDNA 1700037C18 gene
9	ENSMUSG00000005986	-0.265625	0.226297	-0.20282	Ankrd13d	ankyrin repeat domain 13 family, member D
14	ENSMUSG00000005994	0	1.19084	0	Tyrp1	tyrosinase-related protein 1
9	ENSMUSG00000006005	-0.259441	0.304529	-0.106445	Tpr	translocated promoter region, nuclear basket protein
10	ENSMUSG00000006007	0	0	0	Pdc	phosducin
9	ENSMUSG00000006010	-0.258528	0.316875	-0.250205	Odr4	odr4 GPCR localization factor homolog
9	ENSMUSG00000006014	-0.337545	0.129809	-0.257092	Prg4	proteoglycan 4 (megakaryocyte stimulating factor, articular superficial zone protein)
5	ENSMUSG00000006019	-0.135615	0.1428	-0.347426	Dhx34	DEAH (Asp-Glu-Ala-His) box polypeptide 34
9	ENSMUSG00000006021	-0.184394	0.193779	-0.14926	Kptn	kaptin
5	ENSMUSG00000006024	-0.0558293	0.119997	-0.200099	Napa	N-ethylmaleimide sensitive fusion protein attachment protein alpha
5	ENSMUSG00000006050	-0.180159	0.368346	-0.232361	Sra1	steroid receptor RNA activator 1
10	ENSMUSG00000006056	0	0	0	Calcoco2	calcium binding and coiled-coil domain 2
5	ENSMUSG00000006057	0.00464325	0.41837	-0.418102	Atp5g1	ATP synthase, H+ transporting, mitochondrial F0 complex, subunit C1 (subunit 9)
5	ENSMUSG00000006058	-0.0769859	0.216613	-0.205338	Snf8	SNF8, ESCRT-II complex subunit, homolog (S. cerevisiae)
9	ENSMUSG00000006095	-0.189804	0.191843	-0.259677	Tbcb	tubulin folding cofactor B
9	ENSMUSG00000006127	-0.27553	0.172517	-0.276414	Inpp5k	inositol polyphosphate 5-phosphatase K
9	ENSMUSG00000006134	-0.231163	0.300393	-0.0171631	Crkl	v-crk avian sarcoma virus CT10 oncogene homolog-like
7	ENSMUSG00000006143	0	0.2	-0.2	Upk3bl	uroplakin 3B-like
13	ENSMUSG00000006154	-0.116992	-0.581378	0	Eps8l1	EPS8-like 1
9	ENSMUSG00000006169	-0.272157	0.233286	-0.11842	Clint1	clathrin interactor 1
14	ENSMUSG00000006179	-0.471229	0.552592	0.193417	Prss16	protease, serine 16 (thymus)
7	ENSMUSG00000006191	-0.0622131	0.204495	-0.183782	Cdkal1	CDK5 regulatory subunit associated protein 1-like 1
10	ENSMUSG00000006200	0	0	0	Rhox6	reproductive homeobox 6
1	ENSMUSG00000006204	0	0	-0.316993	Cdcp3	CUB domain containing protein 3
9	ENSMUSG00000006205	-0.143933	0.112338	-0.216918	Htra1	HtrA serine peptidase 1
9	ENSMUSG00000006215	-0.279395	0.234151	-0.243797	Zbtb17	zinc finger and BTB domain containing 17
7	ENSMUSG00000006216	0	0.316993	-0.2	Clcnkb	chloride channel, voltage-sensitive Kb
10	ENSMUSG00000006218	0	0	0	Fam131c	family with sequence similarity 131, member C
10	ENSMUSG00000006219	0.0577952	0.00170344	-0.117649	Fblim1	filamin binding LIM protein 1
15	ENSMUSG00000006221	-0.346858	-0.0519248	0.273692	Hspb7	heat shock protein family, member 7 (cardiovascular)
4	ENSMUSG00000006235	0.295026	-0.540571	-0.0584443	Epor	erythropoietin receptor
3	ENSMUSG00000006241	-0.664386	0.00454402	0.168944	Ccdc159	coiled-coil domain containing 159
9	ENSMUSG00000006262	-0.263008	0.297558	-0.137351	Mob1b	MOB kinase activator 1B
1	ENSMUSG00000006269	0	-0.2	-0.316993	Atp6v1b1	ATPase, H+ transporting, lysosomal V1 subunit B1
12	ENSMUSG00000006270	0.4	0	0	Vax1	ventral anterior homeobox 1
9	ENSMUSG00000006273	-0.187099	0.171275	-0.209411	Atp6v1b2	ATPase, H+ transporting, lysosomal V1 subunit B2
9	ENSMUSG00000006276	-0.092569	0.137519	-0.125186	Eps15l1	epidermal growth factor receptor pathway substrate 15-like 1
9	ENSMUSG00000006281	-0.259959	0.236653	-0.170278	Tep1	telomerase associated protein 1
5	ENSMUSG00000006288	-0.33375	0.177517	-0.419397	Ttc5	tetratricopeptide repeat domain 5
5	ENSMUSG00000006289	-0.270723	0.230293	-0.418744	Osgep	O-sialoglycoprotein endopeptidase
5	ENSMUSG00000006299	-0.181271	0.22381	-0.307699	Aamp	angio-associated migratory protein
9	ENSMUSG00000006301	-0.223189	0.168449	-0.266187	Tmbim1	transmembrane BAX inhibitor motif containing 1
5	ENSMUSG00000006304	-0.134533	0.299658	-0.212272	Arpc2	actin related protein 2/3 complex, subunit 2
5	ENSMUSG00000006307	-0.160574	0.276896	-0.210076	Kmt2b	lysine (K)-specific methyltransferase 2B
6	ENSMUSG00000006310	0.275396	0.635333	-0.24403	Zbtb32	zinc finger and BTB domain containing 32
7	ENSMUSG00000006311	-0.2	0.316993	0	Etv2	ets variant 2
9	ENSMUSG00000006313	-0.425857	0.2	0.147393	Upk1a	uroplakin 1A
5	ENSMUSG00000006315	-0.129144	0.244781	-0.383219	Tmem147	transmembrane protein 147
5	ENSMUSG00000006333	-0.114983	0.298275	-0.364852	Rps9	ribosomal protein S9
5	ENSMUSG00000006335	-0.136345	0.304356	-0.27369	Tfpt	TCF3 (E2A) fusion partner
7	ENSMUSG00000006342	0.0262893	0.283313	-0.200351	Susd2	sushi domain containing 2
9	ENSMUSG00000006344	-0.484507	-0.0377967	-0.381655	Ggt5	gamma-glutamyltransferase 5
8	ENSMUSG00000006345	-0.315116	-0.116951	-0.843499	Ggt1	gamma-glutamyltransferase 1
1	ENSMUSG00000006356	-0.0812022	0.00373525	-0.166655	Crip2	cysteine rich protein 2
5	ENSMUSG00000006360	-0.0535223	0.43934	-0.479944	Crip1	cysteine-rich protein 1 (intestinal)
7	ENSMUSG00000006362	-0.141216	0.271373	-0.00908974	Cbfa2t3	CBFA2/RUNX1 translocation partner 3
4	ENSMUSG00000006369	0.392113	-0.463103	-0.10089	Fbln1	fibulin 1
9	ENSMUSG00000006373	-0.270707	0.144499	-0.315652	Pgrmc1	progesterone receptor membrane component 1
2	ENSMUSG00000006378	0.00858492	0.485385	-0.653496	Gcat	glycine C-acetyltransferase (2-amino-3-ketobutyrate-coenzyme A ligase)
10	ENSMUSG00000006386	-0.0865751	0.0783951	0.183971	Tek	TEK receptor tyrosine kinase
7	ENSMUSG00000006389	0.123161	0.22768	-0.0386462	Mpl	myeloproliferative leukemia virus oncogene
5	ENSMUSG00000006390	-0.0742868	0.197934	-0.228197	Elovl1	elongation of very long chain fatty acids (FEN1/Elo2, SUR4/Elo3, yeast)-like 1
9	ENSMUSG00000006392	-0.219215	0.144419	-0.251358	Med8	mediator complex subunit 8
7	ENSMUSG00000006395	-0.068692	0.160205	-0.176825	Hyi	hydroxypyruvate isomerase (putative)
12	ENSMUSG00000006398	0.460356	0.0989557	-0.105264	Cdc20	cell division cycle 20
8	ENSMUSG00000006403	-0.335614	0	-0.716993	Adamts4	a disintegrin-like and metallopeptidase (reprolysin type) with thrombospondin type 1 motif, 4
14	ENSMUSG00000006411	-0.0510466	0.923609	-0.445573	Nectin4	nectin cell adhesion molecule 4
5	ENSMUSG00000006412	-0.278841	0.196313	-0.400695	Pfdn2	prefoldin 2
7	ENSMUSG00000006418	0.200829	0.522188	-0.252924	Rnf114	ring finger protein 114
9	ENSMUSG00000006423	-0.230453	0.190602	-0.130009	Steep1	STING1 ER exit protein 1
2	ENSMUSG00000006435	-0.233589	0.259475	-0.8374	Neurl1a	neuralized E3 ubiquitin protein ligase 1A
5	ENSMUSG00000006442	0.0173724	0.293672	-0.374727	Srm	spermidine synthase
3	ENSMUSG00000006445	-0.66612	0.0857304	-0.331401	Epha2	Eph receptor A2
9	ENSMUSG00000006456	-0.167233	0.175601	-0.198115	Rbm14	RNA binding motif protein 14
5	ENSMUSG00000006457	0.316993	0.316993	-0.361471	Actn3	actinin alpha 3
13	ENSMUSG00000006462	-0.0830075	-0.516992	-0.2	A530013C23Rik	RIKEN cDNA A530013C23 gene
10	ENSMUSG00000006463	-0.132163	0.028105	-0.0562549	Zdhhc24	zinc finger, DHHC domain containing 24
10	ENSMUSG00000006464	0.1307	0.131114	-0.0744214	Bbs1	Bardet-Biedl syndrome 1 (human)
13	ENSMUSG00000006469	-0.2	-0.2	0.2	Slc34a3	solute carrier family 34 (sodium phosphate), member 3
9	ENSMUSG00000006471	-0.165753	0.162546	-0.251277	Ndor1	NADPH dependent diflavin oxidoreductase 1
5	ENSMUSG00000006476	-0.132895	0.19866	-0.293896	Nsmf	NMDA receptor synaptonuclear signaling and neuronal migration factor
10	ENSMUSG00000006488	0	0	0	Prl7a1	prolactin family 7, subfamily a, member 1
10	ENSMUSG00000006490	0	0	0	Prl8a9	prolactin family8, subfamily a, member 9
9	ENSMUSG00000006494	-0.269873	0.174806	-0.237657	Pdk1	pyruvate dehydrogenase kinase, isoenzyme 1
7	ENSMUSG00000006498	-0.0486631	0.292736	-0.187539	Ptbp1	polypyrimidine tract binding protein 1
5	ENSMUSG00000006517	-0.0974455	0.224044	-0.374153	Mvd	mevalonate (diphospho) decarboxylase
5	ENSMUSG00000006519	-0.0499474	0.25738	-0.452904	Cyba	cytochrome b-245, alpha polypeptide
7	ENSMUSG00000006522	0.0305038	0.143672	-0.0857664	Itih3	inter-alpha trypsin inhibitor, heavy chain 3
5	ENSMUSG00000006526	-0.329987	0.346663	-0.359771	Stimate	STIM activating enhancer
9	ENSMUSG00000006527	-0.182348	0.195259	-0.214398	Sfmbt1	Scm-like with four mbt domains 1
14	ENSMUSG00000006529	0	0.664386	-0.2	Itih1	inter-alpha trypsin inhibitor, heavy chain 1
10	ENSMUSG00000006538	0	-0.116992	-0.116992	Ihh	Indian hedgehog
3	ENSMUSG00000006542	-1.03398	-0.166015	-0.4	Prkag3	protein kinase, AMP-activated, gamma 3 non-catalytic subunit
10	ENSMUSG00000006546	0	0	0	Cryba2	crystallin, beta A2
15	ENSMUSG00000006567	-0.504223	-0.191746	0.409622	Atp7b	ATPase, Cu++ transporting, beta polypeptide
10	ENSMUSG00000006570	-0.2	0	0	Defb2	defensin beta 2
4	ENSMUSG00000006574	0.796771	-1.09652	0.27322	Slc4a1	solute carrier family 4 (anion exchanger), member 1
13	ENSMUSG00000006575	-0.392304	-0.807639	-0.203835	Rundc3a	RUN domain containing 3A
1	ENSMUSG00000006576	-0.138009	-0.156223	-0.300488	Slc4a3	solute carrier family 4 (anion exchanger), member 3
1	ENSMUSG00000006585	0.00471017	0.0158482	-0.177147	Cdt1	chromatin licensing and DNA replication factor 1
1	ENSMUSG00000006586	0.0474298	-0.0378269	-0.364463	Runx1t1	RUNX1 translocation partner 1
14	ENSMUSG00000006587	-0.334138	0.639184	-0.361471	Snai3	snail family zinc finger 3
5	ENSMUSG00000006589	-0.0723598	0.380942	-0.388211	Aprt	adenine phosphoribosyl transferase
5	ENSMUSG00000006599	-0.144158	0.210189	-0.331353	Gtf2h1	general transcription factor II H, polypeptide 1
1	ENSMUSG00000006611	-0.174915	0.0340358	-0.45345	Hfe	homeostatic iron regulator
9	ENSMUSG00000006638	-0.44826	0.30116	-0.105922	Abhd1	abhydrolase domain containing 1
5	ENSMUSG00000006641	-0.268112	0.135052	-0.448929	Slc5a6	solute carrier family 5 (sodium-dependent vitamin transporter), member 6
14	ENSMUSG00000006642	-0.550978	1.10886	-0.272514	Tcf23	transcription factor 23
3	ENSMUSG00000006649	-0.674643	0.516115	-0.000603765	Nphs1	nephrosis 1, nephrin
1	ENSMUSG00000006651	0.110772	0.0165406	-0.2446	Aplp1	amyloid beta (A4) precursor-like protein 1
9	ENSMUSG00000006673	-0.170664	0.226124	-0.124807	Qrich1	glutamine-rich 1
9	ENSMUSG00000006675	-0.44518	0.0382422	-0.0533573	P4htm	prolyl 4-hydroxylase, transmembrane (endoplasmic reticulum)
9	ENSMUSG00000006676	-0.17658	0.244764	-0.171077	Usp19	ubiquitin specific peptidase 19
10	ENSMUSG00000006678	0.0423704	0.173466	0.133169	Pola1	polymerase (DNA directed), alpha 1
9	ENSMUSG00000006699	-0.292291	0.186278	-0.171961	Cdc42	cell division cycle 42
9	ENSMUSG00000006705	-0.349331	0.0708033	-0.110273	Pknox1	Pbx/knotted 1 homeobox
1	ENSMUSG00000006711	0.0830075	-0.283008	-0.316993	D130043K22Rik	RIKEN cDNA D130043K22 gene
10	ENSMUSG00000006715	0.0813975	-0.0324754	-0.142694	Gmnn	geminin
5	ENSMUSG00000006717	-0.268169	0.258971	-0.347817	Acot13	acyl-CoA thioesterase 13
2	ENSMUSG00000006720	-0.282114	0.491886	-0.683007	Zfp184	zinc finger protein 184 (Kruppel-like)
3	ENSMUSG00000006724	-1.24806	-0.135614	-0.385922	Cyp27b1	cytochrome P450, family 27, subfamily b, polypeptide 1
5	ENSMUSG00000006728	-0.0531276	0.240689	-0.328693	Cdk4	cyclin dependent kinase 4
5	ENSMUSG00000006731	-0.18931	0.282305	-0.36472	B4galnt1	beta-1,4-N-acetyl-galactosaminyl transferase 1
1	ENSMUSG00000006732	-0.134169	0.0588711	-0.315216	Mettl1	methyltransferase 1, tRNA methylguanosine
5	ENSMUSG00000006736	-0.133438	0.329687	-0.305772	Tspan31	tetraspanin 31
9	ENSMUSG00000006740	-0.317188	0.23094	-0.166367	Kif5b	kinesin family member 5B
9	ENSMUSG00000006763	-0.158655	0.0819352	-0.21773	Saal1	serum amyloid A-like 1
10	ENSMUSG00000006764	0	0	0.2	Tph2	tryptophan hydroxylase 2
1	ENSMUSG00000006777	0	-0.116992	-0.4	Krt23	keratin 23
5	ENSMUSG00000006782	-0.161553	0.314493	-0.231184	Cnp	2',3'-cyclic nucleotide 3' phosphodiesterase
2	ENSMUSG00000006784	-0.264386	0.965055	-0.678463	Odad4	outer dynein arm complex subunit 4
9	ENSMUSG00000006800	-0.236903	0.11315	-0.0888863	Sulf2	sulfatase 2
9	ENSMUSG00000006818	-0.211434	0.197587	-0.212426	Sod2	superoxide dismutase 2, mitochondrial
9	ENSMUSG00000006850	-0.207909	0.158055	-0.176269	Tmco6	transmembrane and coiled-coil domains 6
9	ENSMUSG00000006906	-0.170594	0.156274	-0.185242	Stambp	STAM binding protein
9	ENSMUSG00000006920	-0.21836	0.109711	-0.202294	Ezh1	enhancer of zeste 1 polycomb repressive complex 2 subunit
5	ENSMUSG00000006930	0.0570674	0.177214	-0.350601	Hap1	huntingtin-associated protein 1
5	ENSMUSG00000006931	-0.00643774	0.145106	-0.539152	P3h4	prolyl 3-hydroxylase family member 4 (non-enzymatic)
9	ENSMUSG00000006932	-0.221821	0.175208	-0.193028	Ctnnb1	catenin (cadherin associated protein), beta 1
5	ENSMUSG00000006941	-0.220539	0.169461	-0.359063	Eif1b	eukaryotic translation initiation factor 1B
2	ENSMUSG00000006948	-0.2	0.316993	-0.716993	Klk4	kallikrein related-peptidase 4 (prostase, enamel matrix, prostate)
3	ENSMUSG00000006958	-0.948678	-0.0304006	-0.414078	Chrd	chordin
9	ENSMUSG00000006998	-0.130156	0.162961	-0.182067	Psmd2	proteasome (prosome, macropain) 26S subunit, non-ATPase, 2
11	ENSMUSG00000007021	0.316993	0.2	-0.561471	Syngr3	synaptogyrin 3
5	ENSMUSG00000007029	-0.0943967	0.327174	-0.262787	Vars	valyl-tRNA synthetase
5	ENSMUSG00000007030	-0.0181153	0.116848	-0.376206	Vwa7	von Willebrand factor A domain containing 7
5	ENSMUSG00000007033	-0.16749	0.390755	-0.373135	Hspa1l	heat shock protein 1-like
11	ENSMUSG00000007034	0.433985	0.211779	-0.750977	Slc44a4	solute carrier family 44, member 4
5	ENSMUSG00000007035	-0.142534	0.380557	-0.200827	Msh5	mutS homolog 5
5	ENSMUSG00000007036	-0.0292105	0.135892	-0.220144	Abhd16a	abhydrolase domain containing 16A
5	ENSMUSG00000007038	-0.30112	0.16963	-0.420698	Neu1	neuraminidase 1
9	ENSMUSG00000007039	-0.232719	0.240682	-0.129738	Ddah2	dimethylarginine dimethylaminohydrolase 2
5	ENSMUSG00000007041	-0.102452	0.292024	-0.271759	Clic1	chloride intracellular channel 1
5	ENSMUSG00000007050	-0.0157443	0.188285	-0.383162	Lsm2	LSM2 homolog, U6 small nuclear RNA and mRNA degradation associated
7	ENSMUSG00000007080	0.112174	0.299082	-0.0365284	Pole	polymerase (DNA directed), epsilon
8	ENSMUSG00000007097	-0.241871	-0.379319	-0.805426	Atp1a2	ATPase, Na+/K+ transporting, alpha 2 polypeptide
8	ENSMUSG00000007107	-0.508864	-0.4	-0.633985	Atp1a4	ATPase, Na+/K+ transporting, alpha 4 polypeptide
5	ENSMUSG00000007122	-0.0947862	0.147393	-0.664386	Casq1	calsequestrin 1
9	ENSMUSG00000007207	-0.438663	0.0781513	-0.283865	Stx1a	syntaxin 1A (brain)
10	ENSMUSG00000007209	0	0	0	Ceacam9	CEA cell adhesion molecule 9
5	ENSMUSG00000007216	-0.0581104	0.349548	-0.394397	Zfp775	zinc finger protein 775
8	ENSMUSG00000007279	-0.072514	-0.320643	-0.90432	Scube2	signal peptide, CUB domain, EGF-like 2
7	ENSMUSG00000007338	-0.084136	0.346994	-0.184438	Mrpl49	mitochondrial ribosomal protein L49
4	ENSMUSG00000007379	0.29429	-0.348807	0.0184097	Dennd2c	DENN domain containing 2C
9	ENSMUSG00000007411	-0.267369	0.162497	-0.161028	Mark3	MAP/microtubule affinity regulating kinase 3
9	ENSMUSG00000007415	-0.0694238	0.136239	-0.177859	Gatad1	GATA zinc finger domain containing 1
14	ENSMUSG00000007440	-0.352881	0.541732	-0.241649	Pcdha10	protocadherin alpha 10
10	ENSMUSG00000007457	0	0	0	2310003L06Rik	RIKEN cDNA 2310003L06 gene
9	ENSMUSG00000007458	-0.214815	0.229923	-0.194525	M6pr	mannose-6-phosphate receptor, cation dependent
5	ENSMUSG00000007476	-0.255075	0.288307	-0.298483	Lrrc8a	leucine rich repeat containing 8A VRAC subunit A
15	ENSMUSG00000007480	-0.0526069	-0.116992	0.633985	Mc5r	melanocortin 5 receptor
5	ENSMUSG00000007564	-0.109884	0.188974	-0.245056	Ppp2r1a	protein phosphatase 2, regulatory subunit A, alpha
1	ENSMUSG00000007570	-0.110765	0.0384274	-0.33525	Fance	Fanconi anemia, complementation group E
7	ENSMUSG00000007589	-0.0517837	0.269526	-0.0933139	Tinf2	Terf1 (TRF1)-interacting nuclear factor 2
5	ENSMUSG00000007591	-0.190412	0.25607	-0.458268	Tssk4	testis-specific serine kinase 4
7	ENSMUSG00000007594	0.2	0.6	0.316993	Hapln4	hyaluronan and proteoglycan link protein 4
5	ENSMUSG00000007603	-0.232403	0.211059	-0.33987	Dus3l	dihydrouridine synthase 3-like (S. cerevisiae)
9	ENSMUSG00000007610	-0.171027	0.218939	-0.233802	Gtpbp3	GTP binding protein 3
9	ENSMUSG00000007613	-0.336455	0.206059	-0.0954611	Tgfbr1	transforming growth factor, beta receptor I
5	ENSMUSG00000007617	-0.113396	0.183168	-0.223973	Homer1	homer scaffolding protein 1
10	ENSMUSG00000007646	0.0513092	-0.0340831	0.151187	Rad51c	RAD51 paralog C
10	ENSMUSG00000007653	0	0	0	Gabrb2	gamma-aminobutyric acid (GABA) A receptor, subunit beta 2
10	ENSMUSG00000007655	-0.0892299	-0.0210605	-0.0205558	Cav1	caveolin 1, caveolae protein
9	ENSMUSG00000007656	-0.153463	0.227844	-0.166398	Arpp19	cAMP-regulated phosphoprotein 19
1	ENSMUSG00000007659	0.33051	-0.214503	-0.209142	Bcl2l1	BCL2-like 1
9	ENSMUSG00000007670	-0.220381	0.137703	-0.0868612	Khsrp	KH-type splicing regulatory protein
6	ENSMUSG00000007682	0.609899	0.696148	-0.15946	Dio2	deiodinase, iodothyronine, type II
1	ENSMUSG00000007721	-0.0743891	0.0725693	-0.216876	Ccdc124	coiled-coil domain containing 124
9	ENSMUSG00000007739	-0.127891	0.13323	-0.162565	Cct4	chaperonin containing Tcp1, subunit 4 (delta)
7	ENSMUSG00000007777	0.114373	0.320257	-0.125762	Trappc2b	trafficking protein particle complex 2B
10	ENSMUSG00000007783	-0.202211	-0.114449	-0.111695	Cpt1c	carnitine palmitoyltransferase 1c
15	ENSMUSG00000007805	-0.464386	0.516992	0.478463	Twist2	twist basic helix-loop-helix transcription factor 2
9	ENSMUSG00000007812	-0.297463	0.369244	-0.188667	Zfp655	zinc finger protein 655
9	ENSMUSG00000007815	-0.210965	0.145084	-0.147456	Rhoa	ras homolog family member A
7	ENSMUSG00000007817	-0.126621	0.328738	0.0133606	Zmiz1	zinc finger, MIZ-type containing 1
9	ENSMUSG00000007827	-0.321706	0.237935	-0.0649673	Ankrd26	ankyrin repeat domain 26
5	ENSMUSG00000007833	-0.117204	0.279822	-0.286872	Aldh16a1	aldehyde dehydrogenase 16 family, member A1
9	ENSMUSG00000007836	-0.190564	0.264402	-0.219714	Hnrnpa0	heterogeneous nuclear ribonucleoprotein A0
9	ENSMUSG00000007837	-0.224568	0.207031	-0.139016	Prrg2	proline-rich Gla (G-carboxyglutamic acid) polypeptide 2
9	ENSMUSG00000007850	-0.415002	0.2078	-0.265991	Hnrnph1	heterogeneous nuclear ribonucleoprotein H1
5	ENSMUSG00000007867	-0.355757	0.247408	-0.535055	Ift43	intraflagellar transport 43
9	ENSMUSG00000007872	-0.252653	0.245133	-0.254274	Id3	inhibitor of DNA binding 3
8	ENSMUSG00000007877	-0.6	-0.433985	-0.516992	Tcap	titin-cap
9	ENSMUSG00000007880	-0.264009	0.208194	-0.162449	Arid1a	AT rich interactive domain 1A (SWI-like)
10	ENSMUSG00000007888	0	-0.316993	-0.0304006	Crlf1	cytokine receptor-like factor 1
7	ENSMUSG00000007891	0.104449	0.285166	-0.120063	Ctsd	cathepsin D
5	ENSMUSG00000007892	-0.118263	0.272583	-0.450247	Rplp1	ribosomal protein, large, P1
10	ENSMUSG00000007907	0	0	0	Cabs1	calcium binding protein, spermatid specific 1
8	ENSMUSG00000007908	-0.512448	0.147393	-0.747393	Hmgcll1	3-hydroxymethyl-3-methylglutaryl-Coenzyme A lyase-like 1
7	ENSMUSG00000007944	0	0.2	0	Ttc9b	tetratricopeptide repeat domain 9B
14	ENSMUSG00000007946	-0.753343	0.864386	0.2	Phox2a	paired-like homeobox 2a
5	ENSMUSG00000007950	-0.215518	0.135123	-0.5169	Abhd8	abhydrolase domain containing 8
7	ENSMUSG00000007987	0.0768697	0.326096	-0.191928	Ift22	intraflagellar transport 22
15	ENSMUSG00000007989	-0.672514	-0.150977	0.513408	Fzd3	frizzled class receptor 3
4	ENSMUSG00000008028	0.0280355	-0.657901	-0.708864	1700008O03Rik	RIKEN cDNA 1700008O03 gene
1	ENSMUSG00000008035	0.151563	0.154972	-0.292947	Mid1ip1	Mid1 interacting protein 1 (gastrulation specific G12-like (zebrafish))
5	ENSMUSG00000008036	0.0177729	0.193964	-0.441621	Ap2s1	adaptor-related protein complex 2, sigma 1 subunit
13	ENSMUSG00000008090	-0.106327	-0.360959	-0.136427	Fgfrl1	fibroblast growth factor receptor-like 1
13	ENSMUSG00000008129	-0.259091	-0.200485	-0.00276116	Brme1	break repair meiotic recombinase recruitment factor 1
1	ENSMUSG00000008136	0.00270296	-0.0100663	-0.433985	Fhl2	four and a half LIM domains 2
1	ENSMUSG00000008140	-0.127931	0.0621198	-0.293052	Emc10	ER membrane protein complex subunit 10
13	ENSMUSG00000008153	-0.401178	-0.678135	-0.197658	Clstn3	calsyntenin 3
9	ENSMUSG00000008167	-0.448004	-0.12223	-0.202172	Fbxw9	F-box and WD-40 domain protein 9
9	ENSMUSG00000008193	-0.200378	0.298541	-0.106754	Spib	Spi-B transcription factor (Spi-1/PU.1 related)
5	ENSMUSG00000008200	-0.177741	0.383086	-0.213004	Fnbp4	formin binding protein 4
9	ENSMUSG00000008206	-0.343425	0.121163	-0.361864	Cers4	ceramide synthase 4
13	ENSMUSG00000008226	-0.102262	-0.293211	0.073375	Scrn3	secernin 3
9	ENSMUSG00000008301	-0.216797	0.144525	-0.178455	Phax	phosphorylated adaptor for RNA export
9	ENSMUSG00000008305	-0.315295	0.043097	0.0153853	Tle1	transducin-like enhancer of split 1
5	ENSMUSG00000008307	-0.0456578	0.338037	-0.259668	1700109H08Rik	RIKEN cDNA 1700109H08 gene
5	ENSMUSG00000008318	-0.00211915	0.186906	-0.27982	Relt	RELT tumor necrosis factor receptor
5	ENSMUSG00000008333	-0.143882	0.197299	-0.274503	Snrpb2	U2 small nuclear ribonucleoprotein B
7	ENSMUSG00000008348	0.0306861	0.387946	-0.215757	Ubc	ubiquitin C
5	ENSMUSG00000008373	-0.108541	0.156008	-0.2429	Prpf31	pre-mRNA processing factor 31
5	ENSMUSG00000008384	-0.257644	0.441014	-0.441567	Sertad1	SERTA domain containing 1
10	ENSMUSG00000008393	0.161858	-0.258517	-0.0113479	Carhsp1	calcium regulated heat stable protein 1
9	ENSMUSG00000008398	-0.213663	0.173879	-0.177296	Elk3	ELK3, member of ETS oncogene family
9	ENSMUSG00000008429	-0.261222	0.205847	-0.19047	Herpud2	HERPUD family member 2
9	ENSMUSG00000008435	-0.198904	0.0971535	-0.271369	Rdh13	retinol dehydrogenase 13 (all-trans and 9-cis)
3	ENSMUSG00000008438	-0.928771	0.180093	-0.116992	Adam21	a disintegrin and metallopeptidase domain 21
9	ENSMUSG00000008450	-0.233697	0.053567	-0.192403	Nutf2	nuclear transport factor 2
13	ENSMUSG00000008461	-0.116992	-0.561471	0.238529	Fut1	fucosyltransferase 1
9	ENSMUSG00000008475	-0.236113	0.246241	-0.219685	Arpc5	actin related protein 2/3 complex, subunit 5
11	ENSMUSG00000008482	0.678463	0.4	-0.464386	Rnf151	ring finger protein 151
10	ENSMUSG00000008489	0.2	0	0	Elavl2	ELAV like RNA binding protein 1
5	ENSMUSG00000008496	-0.134672	0.294058	-0.189454	Pou2f2	POU domain, class 2, transcription factor 2
9	ENSMUSG00000008540	-0.226473	0.217272	-0.294204	Mgst1	microsomal glutathione S-transferase 1
9	ENSMUSG00000008575	-0.2363	0.0488045	-0.16485	Nfib	nuclear factor I/B
10	ENSMUSG00000008590	0	0	0	Htr3b	5-hydroxytryptamine (serotonin) receptor 3B
8	ENSMUSG00000008601	-0.633985	-0.433985	-0.898371	Rab25	RAB25, member RAS oncogene family
5	ENSMUSG00000008604	-0.216267	0.237329	-0.325611	Ubqln4	ubiquilin 4
14	ENSMUSG00000008658	-0.201712	0.844862	0.127486	Rbfox1	RNA binding protein, fox-1 homolog (C. elegans) 1
5	ENSMUSG00000008668	-0.179491	0.267832	-0.414136	Rps18	ribosomal protein S18
5	ENSMUSG00000008682	-0.11525	0.233428	-0.307497	Rpl10	ribosomal protein L10
5	ENSMUSG00000008683	-0.19636	0.297726	-0.317517	Rps15a	ribosomal protein S15A
5	ENSMUSG00000008690	-0.0262234	0.125644	-0.235104	Ncaph2	non-SMC condensin II complex, subunit H2
9	ENSMUSG00000008730	-0.139831	0.205632	-0.102227	Hipk1	homeodomain interacting protein kinase 1
10	ENSMUSG00000008734	-0.245039	-0.110288	-0.121878	Gprc5b	G protein-coupled receptor, family C, group 5, member B
9	ENSMUSG00000008763	-0.26718	0.186023	-0.166152	Man1a2	mannosidase, alpha, class 1A, member 2
10	ENSMUSG00000008789	0	0	0	Ceacam5	CEA cell adhesion molecule 5
10	ENSMUSG00000008813	0	0	0	Tppp2	tubulin polymerization-promoting protein family member 2
5	ENSMUSG00000008822	-0.0912482	0.262731	-0.364804	Acyp1	acylphosphatase 1, erythrocyte (common) type
4	ENSMUSG00000008843	0.182188	-0.755183	0.0622101	Cldn13	claudin 13
1	ENSMUSG00000008845	0.0499902	-0.136117	-0.376144	Cd163	CD163 antigen
5	ENSMUSG00000008855	-0.147041	0.257473	-0.284114	Hdac5	histone deacetylase 5
9	ENSMUSG00000008859	-0.236432	0.278776	-0.217989	Rala	v-ral simian leukemia viral oncogene A (ras related)
10	ENSMUSG00000008874	0	0	0	Clec3a	C-type lectin domain family 3, member a
5	ENSMUSG00000008892	-0.101771	0.109704	-0.312686	Vdac3	voltage-dependent anion channel 3
2	ENSMUSG00000008932	-0.516992	0.283008	-0.916992	Slc1a7	solute carrier family 1 (glutamate transporter), member 7
9	ENSMUSG00000008958	-0.287887	0.168948	-0.103731	Vps72	vacuolar protein sorting 72
9	ENSMUSG00000008976	-0.330691	0.269432	-0.170479	Gabpa	GA repeat binding protein, alpha
3	ENSMUSG00000008999	-0.672668	0.593424	-0.0616245	Bmp7	bone morphogenetic protein 7
9	ENSMUSG00000009013	-0.298238	0.126739	-0.257433	Dynll1	dynein light chain LC8-type 1
9	ENSMUSG00000009030	-0.306903	0.188821	-0.0875413	Pdcl	phosducin-like
7	ENSMUSG00000009035	0.107463	0.436222	-0.189823	Tmem184b	transmembrane protein 184b
10	ENSMUSG00000009047	0	0	0	Gm5965	predicted gene 5965
13	ENSMUSG00000009070	-1.03398	-0.433985	0.116992	Rsph14	radial spoke head homolog 14 (Chlamydomonas)
9	ENSMUSG00000009073	-0.207804	0.175565	-0.117189	Nf2	neurofibromin 2
7	ENSMUSG00000009075	0.0623233	0.402897	-0.23684	Cabp7	calcium binding protein 7
7	ENSMUSG00000009076	0.0444269	0.395634	-0.174374	Zmat5	zinc finger, matrin type 5
5	ENSMUSG00000009079	-0.199858	0.243474	-0.274902	Ewsr1	Ewing sarcoma breakpoint region 1
9	ENSMUSG00000009090	-0.127338	0.18637	-0.134347	Ap1b1	adaptor protein complex AP-1, beta 1 subunit
10	ENSMUSG00000009092	0.216483	0.11402	0.00143098	Derl3	Der1-like domain family, member 3
12	ENSMUSG00000009093	0.4	0	0.483007	Gstt4	glutathione S-transferase, theta 4
13	ENSMUSG00000009097	-0.116992	-0.316993	0	Tbx1	T-box 1
6	ENSMUSG00000009108	0.547393	0.652607	-0.464386	Gnat2	G protein subunit alpha transducin 2
10	ENSMUSG00000009112	-0.0890441	0.0871031	-0.0481577	Bcl2l13	BCL2-like 13 (apoptosis facilitator)
12	ENSMUSG00000009114	0.416323	0.284552	0.116992	2610028H24Rik	RIKEN cDNA 2610028H24 gene
11	ENSMUSG00000009115	0.316993	0	-0.516992	Spatc1l	spermatogenesis and centriole associated 1 like
9	ENSMUSG00000009145	-0.319109	-0.0408533	-0.199331	Dqx1	DEAQ RNA-dependent ATPase
11	ENSMUSG00000009185	0.4	0.147393	-0.464386	Ccl8	chemokine (C-C motif) ligand 8
9	ENSMUSG00000009207	-0.0794132	0.152482	-0.187671	Lnpk	lunapark, ER junction formation factor
3	ENSMUSG00000009210	-1.35627	0.702915	0.0081284	Prr29	proline rich 29
15	ENSMUSG00000009214	-0.478463	-0.0304006	0.233985	Mymk	myomaker, myoblast fusion factor
11	ENSMUSG00000009216	0.2	0	-0.728771	Fam163b	family with sequence similarity 163, member B
12	ENSMUSG00000009246	0.276473	-0.0476868	0.299595	Trpm5	transient receptor potential cation channel, subfamily M, member 5
3	ENSMUSG00000009248	-0.547393	0	-0.208128	Ascl2	achaete-scute family bHLH transcription factor 2
5	ENSMUSG00000009281	-0.15681	0.0499162	-0.448128	Rarres2	retinoic acid receptor responder (tazarotene induced) 2
9	ENSMUSG00000009291	-0.190405	0.167951	-0.204303	Pttg1ip	pituitary tumor-transforming 1 interacting protein
7	ENSMUSG00000009292	-0.0621212	0.360981	-0.0730737	Trpm2	transient receptor potential cation channel, subfamily M, member 2
5	ENSMUSG00000009293	-0.122288	0.236092	-0.337604	Ube2g2	ubiquitin-conjugating enzyme E2G 2
12	ENSMUSG00000009350	0.694396	0.29497	-0.10457	Mpo	myeloperoxidase
2	ENSMUSG00000009356	-0.0526069	0.886592	-1.01536	Lpo	lactoperoxidase
7	ENSMUSG00000009376	-0.117906	0.268837	0.0413896	Met	met proto-oncogene
15	ENSMUSG00000009378	0.0526069	0.320577	0.461486	Slc16a12	solute carrier family 16 (monocarboxylic acid transporters), member 12
3	ENSMUSG00000009394	-1.09837	0.6	-0.147393	Syn2	synapsin II
9	ENSMUSG00000009406	-0.148869	0.0522944	-0.102592	Elk1	ELK1, member of ETS oncogene family
10	ENSMUSG00000009418	-0.0913327	0.132455	0.0932865	Nav1	neuron navigator 1
9	ENSMUSG00000009470	-0.307327	0.32349	-0.171935	Tnpo1	transportin 1
10	ENSMUSG00000009471	0	0	0	Myod1	myogenic differentiation 1
1	ENSMUSG00000009487	0	0	-0.4	Otog	otogelin
9	ENSMUSG00000009535	-0.312425	0.180076	-0.1465	Rnmt	RNA (guanine-7-) methyltransferase
1	ENSMUSG00000009545	-0.180093	-0.246657	-0.258436	Kcnq1	potassium voltage-gated channel, subfamily Q, member 1
5	ENSMUSG00000009549	-0.176019	0.338949	-0.366322	Srp14	signal recognition particle 14
7	ENSMUSG00000009551	-0.111373	0.363877	-0.146987	6330409D20Rik	RIKEN cDNA 6330409D20 gene
5	ENSMUSG00000009555	-0.206185	0.274282	-0.28137	Cdk9	cyclin dependent kinase 9 (CDC2-related kinase)
9	ENSMUSG00000009563	-0.191451	0.161721	-0.169689	Tor2a	torsin family 2, member A
5	ENSMUSG00000009566	-0.0976479	0.308958	-0.27886	Fpgs	folylpolyglutamyl synthetase
9	ENSMUSG00000009569	-0.351942	0.228776	-0.0364487	Mrtfb	myocardin related transcription factor B
10	ENSMUSG00000009575	-0.133118	0.136069	0.0366164	Cbx5	chromobox 5
10	ENSMUSG00000009580	0	0	0	Odam	odontogenic, ameloblast asssociated
7	ENSMUSG00000009585	-0.110574	0.323074	-0.123638	Apobec3	apolipoprotein B mRNA editing enzyme, catalytic polypeptide 3
13	ENSMUSG00000009588	-0.252607	-0.283008	-0.2	St6galnac1	ST6 (alpha-N-acetyl-neuraminyl-2,3-beta-galactosyl-1,3)-N-acetylgalactosaminide alpha-2,6-sialyltransferase 1
10	ENSMUSG00000009596	0	0	0.2	Taf7l	TATA-box binding protein associated factor 7 like
1	ENSMUSG00000009614	-0.0304143	0.0497934	-0.197953	Sardh	sarcosine dehydrogenase
7	ENSMUSG00000009621	-0.0676857	0.296842	-0.12241	Vav2	vav 2 oncogene
7	ENSMUSG00000009628	0.0665907	0.648721	-0.154703	Tex15	testis expressed gene 15
9	ENSMUSG00000009630	-0.220092	0.238195	-0.156594	Ppp2cb	protein phosphatase 2 (formerly 2A), catalytic subunit, beta isoform
9	ENSMUSG00000009633	-0.362524	-0.0699238	-0.204228	G0s2	G0/G1 switch gene 2
5	ENSMUSG00000009640	-0.206349	0.250785	-0.488768	Dmap1	DNA methyltransferase 1-associated protein 1
1	ENSMUSG00000009646	0.2	0	-0.4	Pla2g12b	phospholipase A2, group XIIB
9	ENSMUSG00000009647	-0.160621	0.244879	-0.206549	Mcu	mitochondrial calcium uniporter
1	ENSMUSG00000009654	-0.141668	-0.307677	-0.313609	Oit3	oncoprotein induced transcript 3
2	ENSMUSG00000009670	-0.483007	0.2	-0.683007	Tex11	testis expressed gene 11
7	ENSMUSG00000009681	-0.107984	0.208262	0.00856863	Bcr	BCR activator of RhoGEF and GTPase
5	ENSMUSG00000009687	-0.191176	0.237987	-0.360943	Fxyd5	FXYD domain-containing ion transport regulator 5
7	ENSMUSG00000009731	-0.0224136	0.22462	-0.064932	Kcnd1	potassium voltage-gated channel, Shal-related family, member 1
10	ENSMUSG00000009733	-0.139092	0.161128	0.0964626	Tfcp2	transcription factor CP2
10	ENSMUSG00000009734	0.2	0	0	Pou6f2	POU domain, class 6, transcription factor 2
5	ENSMUSG00000009739	-0.203062	0.278751	-0.28042	Pou6f1	POU domain, class 6, transcription factor 1
9	ENSMUSG00000009741	-0.238846	0.037663	-0.242333	Ubp1	upstream binding protein 1
9	ENSMUSG00000009772	-0.306926	0.247348	-0.254485	Nuak2	NUAK family, SNF1-like kinase, 2
7	ENSMUSG00000009828	-0.175843	0.28656	0.0662822	Cilk1	ciliogenesis associated kinase 1
7	ENSMUSG00000009863	-0.0643763	0.258838	-0.165585	Sdhb	succinate dehydrogenase complex, subunit B, iron sulfur (Ip)
12	ENSMUSG00000009876	0.238529	-0.189507	0.0526069	Cox4i2	cytochrome c oxidase subunit 4I2
10	ENSMUSG00000009894	0.0198197	0.108324	0.0568617	Snap47	synaptosomal-associated protein, 47
13	ENSMUSG00000009900	-0.2	-0.2	0.2	Wnt3a	wingless-type MMTV integration site family, member 3A
9	ENSMUSG00000009905	-0.258447	0.189613	-0.179065	Kdsr	3-ketodihydrosphingosine reductase
9	ENSMUSG00000009907	-0.273884	0.279719	-0.274472	Vps4b	vacuolar protein sorting 4B
5	ENSMUSG00000009927	-0.181147	0.220545	-0.301725	Rps25	ribosomal protein S25
15	ENSMUSG00000009941	0.166015	-0.0526069	0.619907	Nxf2	nuclear RNA export factor 2
9	ENSMUSG00000009995	-0.254064	0.197905	-0.305927	Tafazzin	tafazzin, phospholipid-lysophospholipid transacylase
5	ENSMUSG00000010021	-0.0720115	0.567589	-0.489776	Kif19a	kinesin family member 19A
9	ENSMUSG00000010025	-0.221586	0.233406	-0.155479	Aldh3a2	aldehyde dehydrogenase family 3, subfamily A2
3	ENSMUSG00000010044	-0.599177	0.103804	-0.0199071	Zmynd10	zinc finger, MYND domain containing 10
9	ENSMUSG00000010045	-0.220597	0.254545	-0.190816	Tmem115	transmembrane protein 115
5	ENSMUSG00000010047	-0.0849325	0.139174	-0.260367	Hyal2	hyaluronoglucosaminidase 2
1	ENSMUSG00000010048	0.0275666	-0.231476	-0.185928	Ifrd2	interferon-related developmental regulator 2
3	ENSMUSG00000010051	-0.559376	-0.0714611	-0.0848791	Hyal1	hyaluronoglucosaminidase 1
9	ENSMUSG00000010054	-0.262657	0.0581157	-0.343845	Tusc2	tumor suppressor 2, mitochondrial calcium regulator
5	ENSMUSG00000010057	-0.23546	0.214484	-0.494495	Nprl2	NPR2 like, GATOR1 complex subunit
15	ENSMUSG00000010064	0	-0.233985	0.916992	Slc38a3	solute carrier family 38, member 3
5	ENSMUSG00000010066	-0.243006	0.467313	-0.386577	Cacna2d2	calcium channel, voltage-dependent, alpha 2/delta subunit 2
5	ENSMUSG00000010067	-0.156293	0.309722	-0.289178	Rassf1	Ras association (RalGDS/AF-6) domain family member 1
7	ENSMUSG00000010080	0.2	0.2	-0.2	Epn3	epsin 3
13	ENSMUSG00000010086	-0.2	-0.716993	-0.2	Rnf112	ring finger protein 112
1	ENSMUSG00000010095	-0.00829489	0.0646914	-0.209021	Slc3a2	solute carrier family 3 (activators of dibasic and neutral amino acid transport), member 2
9	ENSMUSG00000010097	-0.358596	0.131184	-0.216264	Nxf1	nuclear RNA export factor 1
9	ENSMUSG00000010110	-0.199887	0.194079	-0.157168	Stx5a	syntaxin 5A
1	ENSMUSG00000010122	0	0	-0.6	Slc47a1	solute carrier family 47, member 1
8	ENSMUSG00000010136	0	-0.2	-1.18138	Pifo	primary cilia formation
9	ENSMUSG00000010142	-0.296176	0.247021	-0.164449	Tnfrsf13b	tumor necrosis factor receptor superfamily, member 13b
8	ENSMUSG00000010154	-0.864386	-0.338376	-0.755522	Spire2	spire type actin nucleation factor 2
7	ENSMUSG00000010175	0.0657424	0.512119	0.25291	Prox1	prospero homeobox 1
7	ENSMUSG00000010205	0.0759925	0.304196	-0.155691	Raver1	ribonucleoprotein, PTB-binding 1
9	ENSMUSG00000010277	-0.151454	0.243936	-0.0963548	Bltp2	bridge-like lipid transfer protein family member 2
10	ENSMUSG00000010290	-0.067172	0.0932697	-0.161265	AI597479	expressed sequence AI597479
5	ENSMUSG00000010307	0.173307	0.410524	-0.330435	Tmem86a	transmembrane protein 86A
1	ENSMUSG00000010311	-0.2	0	-0.4	Optc	opticin
12	ENSMUSG00000010342	0.401285	0.116992	0.205829	Tex14	testis expressed gene 14
6	ENSMUSG00000010358	0.466972	0.513797	-0.420581	Ifi35	interferon-induced protein 35
9	ENSMUSG00000010362	-0.352952	0.148822	-0.355257	Rdm1	RAD52 motif 1
5	ENSMUSG00000010376	-0.0274857	0.251009	-0.317634	Nedd8	neural precursor cell expressed, developmentally down-regulated gene 8
9	ENSMUSG00000010392	-0.201063	0.236164	-0.082668	Gosr1	golgi SNAP receptor complex member 1
9	ENSMUSG00000010406	-0.22196	0.234528	-0.181459	Mrpl52	mitochondrial ribosomal protein L52
10	ENSMUSG00000010435	0	0	0	Spaca7	sperm acrosome associated 7
5	ENSMUSG00000010453	-0.165929	0.347646	-0.318918	Kansl3	KAT8 regulatory NSL complex subunit 3
11	ENSMUSG00000010461	0.0830075	-0.169599	-0.891886	Eya4	EYA transcriptional coactivator and phosphatase 4
12	ENSMUSG00000010476	0.297085	0.0304006	-0.0631004	Ebf3	early B cell factor 3
9	ENSMUSG00000010492	-0.24745	0.142474	-0.335024	Uckl1os	uridine-cytidine kinase 1-like 1, opposite strand
7	ENSMUSG00000010505	0.2	0.316993	-0.2	Myt1	myelin transcription factor 1
5	ENSMUSG00000010517	-0.0864275	0.19754	-0.18908	Faf1	Fas-associated factor 1
8	ENSMUSG00000010529	-0.483007	-0.486592	-0.528771	Gm266	predicted gene 266
5	ENSMUSG00000010538	-0.0927296	0.287875	-0.30167	Tsacc	TSSK6 activating co-chaperone
9	ENSMUSG00000010554	-0.258941	0.155505	-0.151901	Mettl16	methyltransferase 16, N6-methyladenosine
5	ENSMUSG00000010592	0	0.716993	-0.425857	Dazl	deleted in azoospermia-like
4	ENSMUSG00000010601	0.316993	-0.433985	-0.547393	Apol7a	apolipoprotein L 7a
5	ENSMUSG00000010607	-0.0264845	0.239089	-0.365224	Pigyl	phosphatidylinositol glycan anchor biosynthesis, class Y-like
9	ENSMUSG00000010608	-0.299597	0.147492	-0.356085	Rbm25	RNA binding motif protein 25
5	ENSMUSG00000010609	-0.212246	0.186352	-0.332606	Psen2	presenilin 2
5	ENSMUSG00000010651	-0.212513	0.363972	-0.409316	Acaa1b	acetyl-Coenzyme A acyltransferase 1B
10	ENSMUSG00000010660	0.192657	-0.396174	0.265184	Plcd1	phospholipase C, delta 1
10	ENSMUSG00000010663	-0.181221	-0.0374351	-0.0744216	Fads1	fatty acid desaturase 1
9	ENSMUSG00000010721	-0.440779	0.0121081	-0.315289	Lmbr1	limb region 1
9	ENSMUSG00000010751	-0.272369	0.144365	-0.24777	Tnfrsf22	tumor necrosis factor receptor superfamily, member 22
10	ENSMUSG00000010755	-0.173725	-0.13291	-0.0761235	Cars	cysteinyl-tRNA synthetase
12	ENSMUSG00000010760	0.716993	-0.147393	-0.316993	Phlda2	pleckstrin homology like domain, family A, member 2
4	ENSMUSG00000010796	0.2	-0.516992	0	Asz1	ankyrin repeat, SAM and basic leucine zipper domain containing 1
12	ENSMUSG00000010797	0.384963	0.348144	0.530277	Wnt2	wingless-type MMTV integration site family, member 2
10	ENSMUSG00000010803	0	0	0	Gabra1	gamma-aminobutyric acid (GABA) A receptor, subunit alpha 1
3	ENSMUSG00000010825	-0.633985	0.2	0.316993	Grid2ip	glutamate receptor, ionotropic, delta 2 (Grid2) interacting protein 1
2	ENSMUSG00000010830	-0.226656	0.365448	-0.788375	Kdelr3	KDEL (Lys-Asp-Glu-Leu) endoplasmic reticulum protein retention receptor 3
1	ENSMUSG00000010841	0.116992	0	-0.516992	Cfap97d1	CFAP97 domain containing 1
10	ENSMUSG00000010911	-0.0854694	0.120006	-0.109223	Apip	APAF1 interacting protein
5	ENSMUSG00000010914	-0.115524	0.162867	-0.278836	Pdhx	pyruvate dehydrogenase complex, component X
7	ENSMUSG00000010936	-0.00671768	0.23492	-0.196291	Vac14	Vac14 homolog (S. cerevisiae)
5	ENSMUSG00000011008	-0.181567	0.305075	-0.361298	Mcoln2	mucolipin 2
7	ENSMUSG00000011034	0	0.2	-0.2	Slc5a1	solute carrier family 5 (sodium/glucose cotransporter), member 1
5	ENSMUSG00000011052	-0.2	0.516992	-0.4	No associated gene
1	ENSMUSG00000011096	-0.113601	-0.0881139	-0.337878	Akt1s1	AKT1 substrate 1 (proline-rich)
7	ENSMUSG00000011114	-0.0852855	0.274986	-0.142475	Tbrg1	transforming growth factor beta regulated gene 1
1	ENSMUSG00000011118	0	-0.4	-0.316993	Panx3	pannexin 3
11	ENSMUSG00000011148	0.180289	0.206918	-0.64539	Adssl1	adenylosuccinate synthetase like 1
10	ENSMUSG00000011154	0	0	0.2	Cfap161	cilia and flagella associated protein 161
9	ENSMUSG00000011158	-0.394806	0.113098	-0.364108	Brf1	BRF1, RNA polymerase III transcription initiation factor 90 kDa subunit
8	ENSMUSG00000011171	-0.417362	-0.029461	-0.851478	Vipr2	vasoactive intestinal peptide receptor 2
10	ENSMUSG00000011179	0.0481338	-0.194868	-0.0545241	Odc1	ornithine decarboxylase, structural 1
9	ENSMUSG00000011254	-0.242085	0.279917	-0.217344	Thg1l	tRNA-histidine guanylyltransferase 1-like (S. cerevisiae)
5	ENSMUSG00000011256	-0.118051	0.396242	-0.19322	Adam19	a disintegrin and metallopeptidase domain 19 (meltrin beta)
1	ENSMUSG00000011257	-0.0619651	-0.209079	-0.144477	Pabpc4	poly(A) binding protein, cytoplasmic 4
9	ENSMUSG00000011263	-0.177153	0.0476729	-0.283171	Exoc3l2	exocyst complex component 3-like 2
5	ENSMUSG00000011267	-0.186686	0.414072	-0.304094	Zfp296	zinc finger protein 296
14	ENSMUSG00000011305	-0.2	1	-0.244478	Plin5	perilipin 5
5	ENSMUSG00000011306	-0.0986769	0.204267	-0.292507	Sugp1	SURP and G patch domain containing 1
10	ENSMUSG00000011349	0	-0.316993	0	Dmrtc2	doublesex and mab-3 related transcription factor like family C2
7	ENSMUSG00000011350	-0.2	0.4	0.072514	Gm5893	predicted gene 5893
9	ENSMUSG00000011382	-0.211884	0.240397	-0.129848	Dhdh	dihydrodiol dehydrogenase (dimeric)
9	ENSMUSG00000011427	-0.360784	0.454185	-0.124255	Zfp790	zinc finger protein 790
4	ENSMUSG00000011463	0.258254	-1.41301	-0.400785	Cpb1	carboxypeptidase B1 (tissue)
7	ENSMUSG00000011486	0.2	0.2	0	Slc25a41	solute carrier family 25, member 41
3	ENSMUSG00000011589	-0.833985	0.2	0.2	Fsd1	fibronectin type 3 and SPRY domain-containing protein
5	ENSMUSG00000011632	0	0.2	-0.316993	Pinlyp	phospholipase A2 inhibitor and LY6/PLAUR domain containing
5	ENSMUSG00000011658	-0.102456	0.186557	-0.285891	Fuz	fuzzy planar cell polarity protein
5	ENSMUSG00000011751	-0.164539	0.2631	-0.4	Sptbn4	spectrin beta, non-erythrocytic 4
7	ENSMUSG00000011752	-0.0364332	0.47636	-0.186735	Pgam1	phosphoglycerate mutase 1
1	ENSMUSG00000011831	-0.0290246	-0.235699	-0.112019	Evi5	ecotropic viral integration site 5
5	ENSMUSG00000011832	-0.180049	0.19908	-0.313766	Evi5l	ecotropic viral integration site 5 like
5	ENSMUSG00000011837	-0.0383034	0.0957824	-0.543669	Snapc2	small nuclear RNA activating complex, polypeptide 2
5	ENSMUSG00000011877	-0.0988494	0.179992	-0.30068	Git1	GIT ArfGAP 1
9	ENSMUSG00000011884	-0.135632	0.1735	-0.167325	Gltp	glycolipid transfer protein
9	ENSMUSG00000011958	-0.284265	0.204345	-0.214915	Bnip2	BCL2/adenovirus E1B interacting protein 2
9	ENSMUSG00000011960	-0.280996	0.143836	-0.16179	Ccnt1	cyclin T1
5	ENSMUSG00000012017	-0.203683	0.172578	-0.396381	Scarf2	scavenger receptor class F, member 2
10	ENSMUSG00000012042	0	0	0	4930579F01Rik	RIKEN cDNA 4930579F01 gene
9	ENSMUSG00000012076	-0.161384	0.131343	-0.270202	Brms1l	breast cancer metastasis-suppressor 1-like
7	ENSMUSG00000012114	-0.0572647	0.199219	-0.12049	Med15	mediator complex subunit 15
9	ENSMUSG00000012117	-0.196602	0.222894	-0.126471	Dhdds	dehydrodolichyl diphosphate synthase
9	ENSMUSG00000012123	-0.26608	-0.000413228	-0.157736	Crybg2	crystallin beta-gamma domain containing 2
5	ENSMUSG00000012126	-0.161748	0.304659	-0.368744	Ubxn11	UBX domain protein 11
10	ENSMUSG00000012187	0	0	0	Mogat1	monoacylglycerol O-acyltransferase 1
7	ENSMUSG00000012211	0	0.2	0	Tex22	testis expressed gene 22
10	ENSMUSG00000012282	0	0	0	Wnt8a	wingless-type MMTV integration site family, member 8A
9	ENSMUSG00000012296	-0.190123	0.198448	-0.113705	Tjap1	tight junction associated protein 1
9	ENSMUSG00000012350	-0.300313	-0.0514829	-0.278012	Ehf	ets homologous factor
13	ENSMUSG00000012396	-0.2	-0.4	0.2	Nanog	Nanog homeobox
5	ENSMUSG00000012405	-0.117465	0.254236	-0.312934	Rpl15	ribosomal protein L15
9	ENSMUSG00000012422	-0.297047	0.270417	-0.230244	Tmem167	transmembrane protein 167
9	ENSMUSG00000012428	-0.322489	0.373874	-0.286463	Steap4	STEAP family member 4
9	ENSMUSG00000012429	-0.378169	0.112124	-0.360623	Mplkip	M-phase specific PLK1 intereacting protein
12	ENSMUSG00000012443	0.379227	0.11306	0.195395	Kif11	kinesin family member 11
10	ENSMUSG00000012483	-0.0204677	0.114425	-0.127891	Rpa3	replication protein A3
6	ENSMUSG00000012519	0.669649	0.930803	-0.174728	Mlkl	mixed lineage kinase domain-like
10	ENSMUSG00000012520	0	0	0	Phox2b	paired-like homeobox 2b
9	ENSMUSG00000012535	-0.241034	0.226583	-0.255343	Tnpo3	transportin 3
7	ENSMUSG00000012609	0.0594691	0.221454	-0.113588	Ttll5	tubulin tyrosine ligase-like family, member 5
9	ENSMUSG00000012640	-0.334788	0.34428	-0.224607	Zfp715	zinc finger protein 715
14	ENSMUSG00000012705	-0.283008	1.06439	-0.264386	Retn	resistin
8	ENSMUSG00000012777	-0.34954	-0.0193914	-0.504293	Acp4	acid phosphatase 4
5	ENSMUSG00000012819	-0.0377873	0.366577	-0.397898	Cdh23	cadherin 23 (otocadherin)
5	ENSMUSG00000012848	-0.0832954	0.298663	-0.370065	Rps5	ribosomal protein S5
5	ENSMUSG00000012889	-0.0432796	0.499638	-0.356172	Podnl1	podocan-like 1
9	ENSMUSG00000013033	-0.324579	-0.00391494	-0.24446	Adgrl1	adhesion G protein-coupled receptor L1
9	ENSMUSG00000013076	-0.324013	0.0689354	0.00865537	Amotl1	angiomotin-like 1
1	ENSMUSG00000013083	0.2	0	-0.4	2200002J24Rik	RIKEN cDNA 2200002J24 gene
5	ENSMUSG00000013089	-0.0265778	0.259142	-0.26279	Etv5	ets variant 5
5	ENSMUSG00000013091	-0.166015	0.181378	-0.347393	Tmem190	transmembrane protein 190
9	ENSMUSG00000013150	-0.47306	0.232496	-0.360568	Gfod2	glucose-fructose oxidoreductase domain containing 2
5	ENSMUSG00000013155	-0.0797824	0.359413	-0.564008	Enkd1	enkurin domain containing 1
9	ENSMUSG00000013158	-0.464386	0.2	-0.116992	4933405L10Rik	RIKEN cDNA 4933405L10 gene
10	ENSMUSG00000013160	-0.0241808	0.108406	-0.147047	Atp6v0d1	ATPase, H+ transporting, lysosomal V0 subunit D1
10	ENSMUSG00000013236	-0.0721788	0.122097	-0.135996	Ptprs	protein tyrosine phosphatase receptor type S
9	ENSMUSG00000013275	-0.23442	0.296414	-0.147106	Slc41a1	solute carrier family 41, member 1
11	ENSMUSG00000013338	0.116992	0.116992	-0.6	Fer1l4	fer-1-like 4 (C. elegans)
10	ENSMUSG00000013353	0	0	0	4931406B18Rik	RIKEN cDNA 4931406B18 gene
5	ENSMUSG00000013367	0.2	0.547393	-0.516992	Iglon5	IgLON family member 5
11	ENSMUSG00000013415	0.316993	0.2	-0.6	Igf2bp1	insulin-like growth factor 2 mRNA binding protein 1
9	ENSMUSG00000013418	-0.316993	0.2	0.116992	B4galnt2	beta-1,4-N-acetyl-galactosaminyl transferase 2
1	ENSMUSG00000013419	0.0490807	-0.0805622	-0.348722	Zfp651	zinc finger protein 651
9	ENSMUSG00000013465	-0.25088	0.197263	-0.222786	Nelfb	negative elongation factor complex member B
3	ENSMUSG00000013483	-0.656116	0.202795	-0.154196	Card14	caspase recruitment domain family, member 14
9	ENSMUSG00000013495	-0.211413	0.13536	-0.321354	Tmem175	transmembrane protein 175
2	ENSMUSG00000013523	-0.12742	1.06809	-1.10067	Bcas1	brain enriched myelin associated protein 1
10	ENSMUSG00000013539	-0.182071	-0.0655472	-0.134942	Tango2	transport and golgi organization 2
12	ENSMUSG00000013562	0.464386	0.4	0.0526069	4833413E03Rik	RIKEN cDNA 4833413E03 gene
7	ENSMUSG00000013584	0.189507	0.228856	-0.250081	Aldh1a2	aldehyde dehydrogenase family 1, subfamily A2
5	ENSMUSG00000013593	-0.137884	0.195483	-0.319113	Ndufs2	NADH:ubiquinone oxidoreductase core subunit S2
1	ENSMUSG00000013611	0.256191	-0.230401	-0.1322	Snx31	sorting nexin 31
5	ENSMUSG00000013622	-0.211011	0.308353	-0.25993	Atraid	all-trans retinoic acid induced differentiation factor
7	ENSMUSG00000013629	-0.11628	0.275877	-0.0536969	Cad	carbamoyl-phosphate synthetase 2, aspartate transcarbamylase, and dihydroorotase
13	ENSMUSG00000013643	-0.2	-0.2	0.2	Lypd8	LY6/PLAUR domain containing 8
5	ENSMUSG00000013646	0.00489763	0.224722	-0.329854	Sh3bp5l	SH3 binding domain protein 5 like
6	ENSMUSG00000013653	0.316993	0.633985	-0.316993	1810065E05Rik	RIKEN cDNA 1810065E05 gene
9	ENSMUSG00000013662	-0.322271	0.286042	-0.252127	Atad1	ATPase family, AAA domain containing 1
9	ENSMUSG00000013663	-0.359595	0.224451	-0.128104	Pten	phosphatase and tensin homolog
10	ENSMUSG00000013668	0	0	0	4933402N03Rik	RIKEN cDNA 4933402N03 gene
9	ENSMUSG00000013698	-0.227958	0.148849	-0.190424	Pea15a	proliferation and apoptosis adaptor protein 15A
5	ENSMUSG00000013701	-0.0260453	0.31255	-0.33489	Timm23	translocase of inner mitochondrial membrane 23
5	ENSMUSG00000013707	-0.0721508	0.314189	-0.40231	Tnfaip8l2	tumor necrosis factor, alpha-induced protein 8-like 2
9	ENSMUSG00000013736	-0.259705	0.258601	-0.244734	Trnt1	tRNA nucleotidyl transferase, CCA-adding, 1
4	ENSMUSG00000013766	0.322942	-1.13107	-0.328309	Ly6g6e	lymphocyte antigen 6 complex, locus G6E
5	ENSMUSG00000013787	-0.023641	0.367942	-0.269785	Ehmt2	euchromatic histone lysine N-methyltransferase 2
5	ENSMUSG00000013822	-0.0350001	0.141545	-0.306748	Elof1	ELF1 homolog, elongation factor 1
5	ENSMUSG00000013833	-0.163038	0.351662	-0.275766	Med16	mediator complex subunit 16
9	ENSMUSG00000013846	-0.139209	0.138676	-0.079614	St3gal1	ST3 beta-galactoside alpha-2,3-sialyltransferase 1
5	ENSMUSG00000013858	-0.182234	0.162798	-0.429192	Tmem259	transmembrane protein 259
9	ENSMUSG00000013878	-0.329506	0.228176	-0.138628	Rnf170	ring finger protein 170
9	ENSMUSG00000013921	-0.232704	0.0686173	-0.14789	Clip3	CAP-GLY domain containing linker protein 3
14	ENSMUSG00000013928	-0.2	0.633985	0.2	1700020L13Rik	RIKEN cDNA 1700020L13 gene
4	ENSMUSG00000013936	0.0830075	-0.483007	0.0830075	Myl2	myosin, light polypeptide 2, regulatory, cardiac, slow
9	ENSMUSG00000013973	-0.260169	0.156798	-0.181714	Dedd	death effector domain-containing
5	ENSMUSG00000013974	-0.0526557	0.247655	-0.343748	Mcemp1	mast cell expressed membrane protein 1
9	ENSMUSG00000013997	-0.197303	0.199479	-0.209419	Nit1	nitrilase 1
9	ENSMUSG00000014030	-0.230732	0.127657	-0.3315	Pax5	paired box 5
9	ENSMUSG00000014039	-0.478692	0.2333	-0.0649256	Prdm15	PR domain containing 15
9	ENSMUSG00000014074	-0.0944424	0.0982434	-0.167458	Rnf168	ring finger protein 168
5	ENSMUSG00000014075	-0.239485	0.386184	-0.427755	Dynlt2b	dynein light chain Tctex-type 2B
9	ENSMUSG00000014077	-0.0912378	0.164139	-0.159215	Chp1	calcineurin-like EF hand protein 1
10	ENSMUSG00000014104	0	0	0	Sval2	seminal vesicle antigen-like 2
5	ENSMUSG00000014158	-0.188221	0.274058	-0.31121	Trpv4	transient receptor potential cation channel, subfamily V, member 4
3	ENSMUSG00000014164	-0.594072	0.157031	0.136365	Klhl3	kelch-like 3
5	ENSMUSG00000014177	-0.289423	0.270819	-0.373038	Tvp23b	trans-golgi network vesicle protein 23B
9	ENSMUSG00000014195	-0.261157	0.219737	-0.218973	Dnajc7	DnaJ heat shock protein family (Hsp40) member C7
8	ENSMUSG00000014198	-0.581378	0.119171	-0.720181	Zfp385c	zinc finger protein 385C
9	ENSMUSG00000014226	-0.239547	0.138521	-0.175355	Cacybp	calcyclin binding protein
5	ENSMUSG00000014232	-0.239018	0.27268	-0.403643	Cluap1	clusterin associated protein 1
5	ENSMUSG00000014243	-0.170311	0.298454	-0.280108	Zswim7	zinc finger SWIM-type containing 7
7	ENSMUSG00000014245	0.0259849	0.191679	-0.141375	Pigl	phosphatidylinositol glycan anchor biosynthesis, class L
5	ENSMUSG00000014294	0.00733905	0.153192	-0.421367	Ndufa2	NADH:ubiquinone oxidoreductase subunit A2
5	ENSMUSG00000014301	-0.180588	0.24701	-0.291114	Pam16	presequence translocase-asssociated motor 16
7	ENSMUSG00000014303	0.0978311	0.305344	0.0158307	Glis2	GLIS family zinc finger 2
5	ENSMUSG00000014313	-0.257036	0.223979	-0.385988	Cox6c	cytochrome c oxidase subunit 6C
9	ENSMUSG00000014329	-0.156596	0.19261	-0.0542275	Bicc1	BicC family RNA binding protein 1
5	ENSMUSG00000014349	-0.192298	0.290296	-0.254514	Ube2z	ubiquitin-conjugating enzyme E2Z
10	ENSMUSG00000014351	0	0	0	Gip	gastric inhibitory polypeptide
9	ENSMUSG00000014353	-0.450463	0.0956143	-0.15757	Tmem87b	transmembrane protein 87B
7	ENSMUSG00000014355	-0.131897	0.284785	-0.0383086	Anapc1	anaphase promoting complex subunit 1
7	ENSMUSG00000014361	-0.0343374	0.257525	-0.121649	Mertk	MER proto-oncogene tyrosine kinase
9	ENSMUSG00000014402	-0.224283	0.0231167	-0.246175	Tsg101	tumor susceptibility gene 101
9	ENSMUSG00000014418	-0.184573	0.180862	-0.247543	Hps5	HPS5, biogenesis of lysosomal organelles complex 2 subunit 2
9	ENSMUSG00000014426	-0.256513	0.208352	-0.067252	Map3k4	mitogen-activated protein kinase kinase kinase 4
9	ENSMUSG00000014444	-0.162879	0.210726	-0.193458	Piezo1	piezo-type mechanosensitive ion channel component 1
9	ENSMUSG00000014453	-0.245523	0.367596	-0.220639	Blk	B lymphoid kinase
5	ENSMUSG00000014470	-0.0919221	0.381439	-0.332294	Rnf166	ring finger protein 166
7	ENSMUSG00000014496	-0.112586	0.313563	-0.143424	Ankrd28	ankyrin repeat domain 28
9	ENSMUSG00000014498	-0.176282	0.23951	-0.130619	Ankrd52	ankyrin repeat domain 52
9	ENSMUSG00000014503	-0.342275	0.25229	-0.171968	Pkd2l2	polycystic kidney disease 2-like 2
5	ENSMUSG00000014504	-0.0206708	0.174992	-0.321482	Srp19	signal recognition particle 19
9	ENSMUSG00000014529	-0.516992	0.4	-0.4	Tmbim7	transmembrane BAX inhibitor motif containing 7
7	ENSMUSG00000014542	0	0.2	0	Clec4f	C-type lectin domain family 4, member f
9	ENSMUSG00000014543	-0.396779	-0.127118	-0.287397	Klra17	killer cell lectin-like receptor, subfamily A, member 17
9	ENSMUSG00000014547	-0.297641	0.292512	0.0296542	Wdfy2	WD repeat and FYVE domain containing 2
9	ENSMUSG00000014550	-0.30962	0.20748	-0.0841058	Rbsn	rabenosyn, RAB effector
9	ENSMUSG00000014551	-0.287622	0.128324	-0.220649	Mrps25	mitochondrial ribosomal protein S25
9	ENSMUSG00000014554	-0.0967907	0.118418	-0.211367	Dguok	deoxyguanosine kinase
9	ENSMUSG00000014592	-0.220732	0.210613	-0.200592	Camta1	calmodulin binding transcription activator 1
9	ENSMUSG00000014599	-0.278013	0.11235	-0.193165	Csf1	colony stimulating factor 1 (macrophage)
9	ENSMUSG00000014601	-0.221083	0.343961	-0.202976	Strip1	striatin interacting protein 1
14	ENSMUSG00000014602	-0.339338	0.655795	0.0379942	Kif1a	kinesin family member 1A
15	ENSMUSG00000014603	0	-0.2	0.4	Alx3	aristaless-like homeobox 3
5	ENSMUSG00000014606	-0.252941	0.297071	-0.298641	Slc25a11	solute carrier family 25 (mitochondrial carrier oxoglutarate carrier), member 11
2	ENSMUSG00000014609	0	0.4	-0.833985	Chrne	cholinergic receptor, nicotinic, epsilon polypeptide
1	ENSMUSG00000014633	0.0474074	0.135639	-0.218964	Cmc2	COX assembly mitochondrial protein 2
9	ENSMUSG00000014668	-0.225278	0.226593	-0.194043	Chfr	checkpoint with forkhead and ring finger domains
7	ENSMUSG00000014686	-0.0923225	0.522931	-0.203704	Ceacam16	CEA cell adhesion molecule 16
9	ENSMUSG00000014704	-0.151798	0.105214	-0.203914	Hoxa2	homeobox A2
8	ENSMUSG00000014725	-0.388221	-0.130782	-0.859091	Adam28	a disintegrin and metallopeptidase domain 28
2	ENSMUSG00000014747	-0.30432	0.347393	-0.733435	Ankrd53	ankyrin repeat domain 53
5	ENSMUSG00000014748	-0.149535	0.235374	-0.378574	Tex261	testis expressed gene 261
9	ENSMUSG00000014763	-0.260434	0.110935	-0.142809	Fam120b	family with sequence similarity 120, member B
9	ENSMUSG00000014767	-0.257639	0.185761	-0.204496	Tbp	TATA box binding protein
5	ENSMUSG00000014769	-0.130684	0.32227	-0.288994	Psmb1	proteasome (prosome, macropain) subunit, beta type 1
9	ENSMUSG00000014771	-0.197427	0.185107	-0.256536	Pdcd2	programmed cell death 2
7	ENSMUSG00000014773	-0.0899148	0.252298	-0.116586	Dll1	delta like canonical Notch ligand 1
5	ENSMUSG00000014776	-0.333804	0.543727	-0.343584	Nol3	nucleolar protein 3 (apoptosis repressor with CARD domain)
5	ENSMUSG00000014778	-0.131626	0.200829	-0.237828	Fhod1	formin homology 2 domain containing 1
12	ENSMUSG00000014782	0.550978	-0.0526069	0.233985	Plekhg4	pleckstrin homology domain containing, family G (with RhoGef domain) member 4
7	ENSMUSG00000014786	0.114203	0.208869	-0.00229435	Slc9a5	solute carrier family 9 (sodium/hydrogen exchanger), member 5
7	ENSMUSG00000014791	0.185795	0.145444	-0.210464	Elmo3	engulfment and cell motility 3
1	ENSMUSG00000014813	-0.0962813	-0.112526	-0.518804	Stc1	stanniocalcin 1
14	ENSMUSG00000014837	-0.217606	0.555846	-0.183638	Matcap1	microtubule associated tyrosine carboxypeptidase 1
6	ENSMUSG00000014846	0.438125	0.478926	-0.139433	Tppp3	tubulin polymerization-promoting protein family member 3
7	ENSMUSG00000014850	-0.165877	0.305208	-0.0959385	Msh3	mutS homolog 3
5	ENSMUSG00000014852	-0.229675	0.351252	-0.307054	Adamts13	a disintegrin-like and metallopeptidase (reprolysin type) with thrombospondin type 1 motif, 13
9	ENSMUSG00000014856	-0.274846	0.0940768	-0.315656	Tmem208	transmembrane protein 208
1	ENSMUSG00000014859	-0.0679656	0.00767353	-0.162771	E2f4	E2F transcription factor 4
9	ENSMUSG00000014867	-0.151223	0.285595	-0.160331	Surf4	surfeit gene 4
5	ENSMUSG00000014873	-0.136516	0.292454	-0.253883	Surf2	surfeit gene 2
9	ENSMUSG00000014905	-0.269447	0.0611817	-0.0898699	Dnajb9	DnaJ heat shock protein family (Hsp40) member B9
9	ENSMUSG00000014907	-0.0984887	0.166385	-0.201826	Naf1	nuclear assembly factor 1 ribonucleoprotein
9	ENSMUSG00000014932	-0.385547	0.269747	0.0816062	Yes1	YES proto-oncogene 1, Src family tyrosine kinase
10	ENSMUSG00000014956	-0.14111	0.0139346	-0.107053	Ppp1cb	protein phosphatase 1 catalytic subunit beta
9	ENSMUSG00000014959	-0.208023	0.307299	-0.202969	Gorasp2	golgi reassembly stacking protein 2
9	ENSMUSG00000014980	-0.308791	0.173718	-0.16406	Tsen15	tRNA splicing endonuclease subunit 15
10	ENSMUSG00000015001	-0.2	0	0	Oc90	otoconin 90
9	ENSMUSG00000015002	-0.223769	0.210593	-0.0943745	Efr3a	EFR3 homolog A
5	ENSMUSG00000015013	-0.136407	0.175101	-0.474662	Trappc2l	trafficking protein particle complex 2L
9	ENSMUSG00000015016	-0.22159	0.283973	-0.125114	Acsf3	acyl-CoA synthetase family member 3
7	ENSMUSG00000015023	-0.140907	0.305244	-0.0658936	Ddx19a	DEAD box helicase 19a
5	ENSMUSG00000015027	-0.0107393	0.474178	-0.35664	Galns	galactosamine (N-acetyl)-6-sulfate sulfatase
12	ENSMUSG00000015053	0.231308	0.166413	0.0113051	Gata2	GATA binding protein 2
15	ENSMUSG00000015083	-0.185841	-0.223965	0.307496	C8g	complement component 8, gamma polypeptide
11	ENSMUSG00000015085	0.383022	0.507687	-0.73685	Entpd2	ectonucleoside triphosphate diphosphohydrolase 2
9	ENSMUSG00000015087	-0.21863	0.145238	-0.292478	Rabl6	RAB, member RAS oncogene family-like 6
8	ENSMUSG00000015090	-1	0.2	-1.23399	Ptgds	prostaglandin D2 synthase (brain)
5	ENSMUSG00000015092	-0.0925037	0.235984	-0.293915	Edf1	endothelial differentiation-related factor 1
8	ENSMUSG00000015093	-0.38341	0.09348	-0.847607	Clic3	chloride intracellular channel 3
9	ENSMUSG00000015094	-0.175058	0.0302393	-0.149215	Npdc1	neural proliferation, differentiation and control 1
7	ENSMUSG00000015095	-0.0609153	0.281433	-0.155417	Fbxw5	F-box and WD-40 domain protein 5
9	ENSMUSG00000015112	-0.417391	0.492909	-0.26608	Slc25a13	solute carrier family 25 (mitochondrial carrier, adenine nucleotide translocator), member 13
9	ENSMUSG00000015120	-0.244745	0.228978	-0.221383	Ube2i	ubiquitin-conjugating enzyme E2I
9	ENSMUSG00000015126	-0.212272	0.183797	-0.292569	Tsr3	TSR3 20S rRNA accumulation
9	ENSMUSG00000015127	-0.288169	0.284572	-0.264166	Unkl	unkempt family like zinc finger
7	ENSMUSG00000015133	-0.0263406	0.375919	-0.0967119	Lrrk1	leucine-rich repeat kinase 1
9	ENSMUSG00000015134	-0.447445	0.135891	-0.33449	Aldh1a3	aldehyde dehydrogenase family 1, subfamily A3
9	ENSMUSG00000015143	-0.0894946	0.138117	-0.164923	Actn1	actinin, alpha 1
5	ENSMUSG00000015149	-0.103165	0.203466	-0.210497	Sirt2	sirtuin 2
9	ENSMUSG00000015165	-0.207549	0.203476	-0.232986	Hnrnpl	heterogeneous nuclear ribonucleoprotein L
7	ENSMUSG00000015176	-0.0625879	0.225785	-0.190465	Nolc1	nucleolar and coiled-body phosphoprotein 1
9	ENSMUSG00000015189	-0.367783	0.207293	-0.168158	Casd1	CAS1 domain containing 1
9	ENSMUSG00000015202	-0.253276	0.109105	-0.0932163	Cnksr3	Cnksr family member 3
7	ENSMUSG00000015214	-0.158821	0.398452	-0.093231	Mtmr1	myotubularin related protein 1
13	ENSMUSG00000015217	-0.209766	-0.404448	-0.00654683	Hmgb3	high mobility group box 3
7	ENSMUSG00000015222	-0.0288981	0.220989	-0.177474	Map2	microtubule-associated protein 2
15	ENSMUSG00000015224	-0.431224	-0.105309	0.270408	Cyp2j9	cytochrome P450, family 2, subfamily j, polypeptide 9
10	ENSMUSG00000015242	0	0	0	Nipsnap3a	nipsnap homolog 3A
9	ENSMUSG00000015243	-0.402804	0.00769522	-0.102029	Abca1	ATP-binding cassette, sub-family A (ABC1), member 1
5	ENSMUSG00000015247	-0.23357	0.282293	-0.276088	Nipsnap3b	nipsnap homolog 3B
5	ENSMUSG00000015289	-0.127734	0.186309	-0.308142	Lage3	L antigen family, member 3
5	ENSMUSG00000015290	-0.168483	0.369483	-0.232607	Ubl4a	ubiquitin-like 4A
9	ENSMUSG00000015291	-0.275232	0.061132	-0.272584	Gdi1	guanosine diphosphate (GDP) dissociation inhibitor 1
7	ENSMUSG00000015305	-0.15862	0.191446	0.0111916	Sash1	SAM and SH3 domain containing 1
5	ENSMUSG00000015312	0.0751561	0.735714	-0.393579	Gadd45b	growth arrest and DNA-damage-inducible 45 beta
9	ENSMUSG00000015314	-0.222488	0.26251	-0.266423	Slamf6	SLAM family member 6
7	ENSMUSG00000015316	-0.0979353	0.330939	-0.0729954	Slamf1	signaling lymphocytic activation molecule family member 1
5	ENSMUSG00000015335	-0.0176853	0.306183	-0.381237	Zdhhc12	zinc finger, DHHC domain containing 12
5	ENSMUSG00000015337	-0.212847	0.343949	-0.481468	Endog	endonuclease G
7	ENSMUSG00000015340	0.13938	0.569526	-0.115646	Cybb	cytochrome b-245, beta polypeptide
9	ENSMUSG00000015341	-0.200037	0.102991	-0.224969	Golga7	golgin A7
10	ENSMUSG00000015342	-0.0771547	-0.247439	0.0760214	Xk	X-linked Kx blood group
9	ENSMUSG00000015354	-0.434508	0.350561	0.0682074	Pcolce2	procollagen C-endopeptidase enhancer 2
5	ENSMUSG00000015355	-0.124623	0.308802	-0.30585	Cd48	CD48 antigen
9	ENSMUSG00000015357	-0.229755	0.105621	-0.296292	Clpx	caseinolytic mitochondrial matrix peptidase chaperone subunit
5	ENSMUSG00000015363	-0.165294	0.273331	-0.305381	Trabd	TraB domain containing
7	ENSMUSG00000015365	0	0.316993	0.2	Mov10l1	Mov10 like RISC complex RNA helicase 1
9	ENSMUSG00000015377	-0.437823	0.125191	-0.46869	Dennd6b	DENN domain containing 6B
9	ENSMUSG00000015396	-0.243246	0.0142426	-0.288463	Cd83	CD83 antigen
15	ENSMUSG00000015401	-0.283008	-0.2	0.664386	Cltrn	collectrin, amino acid transport regulator
7	ENSMUSG00000015405	0.233985	0.4	0.316993	Ace2	angiotensin I converting enzyme (peptidyl-dipeptidase A) 2
6	ENSMUSG00000015437	1.91344	1.57012	-0.0534961	Gzmb	granzyme B
10	ENSMUSG00000015441	0	0	0	Gzmf	granzyme F
10	ENSMUSG00000015443	0	0	0	Gzmn	granzyme N
7	ENSMUSG00000015451	0.149299	0.423573	-0.141183	C4a	complement component 4A (Rodgers blood group)
9	ENSMUSG00000015452	-0.449271	0.0293572	-0.299681	Ager	advanced glycosylation end product-specific receptor
5	ENSMUSG00000015461	-0.0676214	0.307087	-0.215331	Atf6b	activating transcription factor 6 beta
1	ENSMUSG00000015467	-0.123714	-0.0246202	-0.249062	Egfl8	EGF-like domain 8
7	ENSMUSG00000015468	0.0174722	0.218523	-0.0154992	Notch4	notch 4
1	ENSMUSG00000015474	-0.084039	0.0900787	-0.325393	Ppt2	palmitoyl-protein thioesterase 2
9	ENSMUSG00000015476	-0.277955	0.0833756	-0.0998996	Prrt1	proline-rich transmembrane protein 1
5	ENSMUSG00000015478	-0.175117	0.17254	-0.284673	Rnf5	ring finger protein 5
9	ENSMUSG00000015484	-0.516992	0.4	-0.2	Fam163a	family with sequence similarity 163, member A
9	ENSMUSG00000015488	-0.381807	0.0652994	-0.366269	Cacfd1	calcium channel flower domain containing 1
9	ENSMUSG00000015501	-0.259429	0.310289	-0.105725	Hivep2	human immunodeficiency virus type I enhancer binding protein 2
10	ENSMUSG00000015519	0	0	0	2310057J18Rik	RIKEN cDNA 2310057J18 gene
9	ENSMUSG00000015522	-0.255355	0.161068	-0.132297	Arnt	aryl hydrocarbon receptor nuclear translocator
10	ENSMUSG00000015533	0.22996	0.115364	-0.0457014	Itga2	integrin alpha 2
5	ENSMUSG00000015536	-0.183468	0.248922	-0.244959	Mocs2	molybdenum cofactor synthesis 2
9	ENSMUSG00000015542	-0.288285	0.453619	-0.221038	Nat9	N-acetyltransferase 9 (GCN5-related, putative)
8	ENSMUSG00000015568	-0.342147	-0.181098	-0.378028	Lpl	lipoprotein lipase
5	ENSMUSG00000015575	-0.174535	0.20837	-0.339374	Atp6v0e	ATPase, H+ transporting, lysosomal V0 subunit E
5	ENSMUSG00000015579	0.111253	0.229678	-0.531175	Nkx2-5	NK2 homeobox 5
9	ENSMUSG00000015597	-0.43373	0.265566	-0.198921	Zfp318	zinc finger protein 318
8	ENSMUSG00000015599	-0.780843	0.221551	-0.732426	Ttbk1	tau tubulin kinase 1
5	ENSMUSG00000015605	-0.155316	0.3875	-0.221016	Srf	serum response factor
9	ENSMUSG00000015619	-0.215553	0.0577546	-0.28621	Gata3	GATA binding protein 3
13	ENSMUSG00000015627	-0.864386	-1.4	0.072514	Gata5	GATA binding protein 5
1	ENSMUSG00000015647	-0.160498	0.0290806	-0.333136	Lama5	laminin, alpha 5
5	ENSMUSG00000015652	0	0.2	-0.316993	Steap1	six transmembrane epithelial antigen of the prostate 1
9	ENSMUSG00000015653	-0.392088	0.103668	-0.427501	Steap2	six transmembrane epithelial antigen of prostate 2
10	ENSMUSG00000015656	-0.124657	0.086956	0.0838833	Hspa8	heat shock protein 8
10	ENSMUSG00000015659	-0.184693	0.036021	-0.0431454	Serac1	serine active site containing 1
15	ENSMUSG00000015665	-0.2	0.2	0.2	Awat1	acyl-CoA wax alcohol acyltransferase 1
7	ENSMUSG00000015668	0.0124283	0.232936	-0.105297	Pdzd11	PDZ domain containing 11
5	ENSMUSG00000015671	-0.146574	0.328844	-0.302782	Psma2	proteasome subunit alpha 2
9	ENSMUSG00000015672	-0.227332	0.309938	-0.233705	Mrpl32	mitochondrial ribosomal protein L32
9	ENSMUSG00000015697	-0.276549	0.195237	-0.129776	Setdb1	SET domain, bifurcated 1
5	ENSMUSG00000015702	-0.0192008	0.269301	-0.411936	Anxa9	annexin A9
10	ENSMUSG00000015709	0.0534516	-0.0332968	-0.0343371	Arnt2	aryl hydrocarbon receptor nuclear translocator 2
5	ENSMUSG00000015711	-0.0721466	0.136184	-0.263821	Prune1	prune exopolyphosphatase
9	ENSMUSG00000015714	-0.228005	0.196535	-0.23023	Cers2	ceramide synthase 2
10	ENSMUSG00000015721	0	0	0	Nlrp5	NLR family, pyrin domain containing 5
9	ENSMUSG00000015733	-0.190042	0.326923	-0.187294	Capza2	capping actin protein of muscle Z-line subunit alpha 2
9	ENSMUSG00000015745	-0.31162	0.261743	-0.266502	Plekho1	pleckstrin homology domain containing, family O member 1
7	ENSMUSG00000015747	-0.0283399	0.164254	-0.148385	Vps45	vacuolar protein sorting 45
9	ENSMUSG00000015748	-0.247041	0.242049	-0.12287	Prpf3	pre-mRNA processing factor 3
10	ENSMUSG00000015749	-0.0555805	0.0507391	-0.10879	Anp32e	acidic (leucine-rich) nuclear phosphoprotein 32 family, member E
5	ENSMUSG00000015750	-0.0620947	0.432395	-0.2967	Aph1a	aph1 homolog A, gamma secretase subunit
9	ENSMUSG00000015755	-0.200042	0.136157	-0.14552	Tab2	TGF-beta activated kinase 1/MAP3K7 binding protein 2
9	ENSMUSG00000015757	-0.22563	0.137567	-0.286047	Ppil4	peptidylprolyl isomerase (cyclophilin)-like 4
9	ENSMUSG00000015759	-0.333299	0.205181	-0.292406	Cnih1	cornichon family AMPA receptor auxiliary protein 1
10	ENSMUSG00000015766	-0.171521	0.0277447	-0.0334729	Eps8	epidermal growth factor receptor pathway substrate 8
5	ENSMUSG00000015776	-0.102814	0.259382	-0.352173	Med22	mediator complex subunit 22
10	ENSMUSG00000015787	0	0	0	Abo	ABO blood group (transferase A, alpha 1-3-N-acetylgalactosaminyltransferase, transferase B, alpha 1-3-galactosyltransferase)
5	ENSMUSG00000015790	-0.222497	0.323704	-0.285873	Surf1	surfeit gene 1
5	ENSMUSG00000015804	-0.216623	0.308559	-0.2834	Med28	mediator complex subunit 28
9	ENSMUSG00000015806	-0.361251	0.203268	-0.327607	Qdpr	quinoid dihydropteridine reductase
8	ENSMUSG00000015812	-0.610388	-0.1971	-0.671703	Gnrh1	gonadotropin releasing hormone 1
12	ENSMUSG00000015829	0.4	0.316993	0.116992	Tnr	tenascin R
5	ENSMUSG00000015837	-0.0488902	0.160814	-0.197221	Sqstm1	sequestosome 1
9	ENSMUSG00000015839	-0.187031	0.188727	-0.0862714	Nfe2l2	nuclear factor, erythroid derived 2, like 2
8	ENSMUSG00000015843	-0.463531	-0.168123	-0.546826	Rxrg	retinoid X receptor gamma
7	ENSMUSG00000015846	-0.0212329	0.421008	-0.158425	Rxra	retinoid X receptor alpha
5	ENSMUSG00000015850	-0.0671248	0.134781	-0.620666	Adamtsl4	ADAMTS-like 4
4	ENSMUSG00000015852	0	-1.03398	-0.950978	Fcrl2	Fc receptor like 2
6	ENSMUSG00000015854	0.769937	0.981378	0.476108	Cd5l	CD5 antigen-like
9	ENSMUSG00000015869	-0.209337	0.251834	-0.25209	Prpsap1	phosphoribosyl pyrophosphate synthetase-associated protein 1
13	ENSMUSG00000015879	-0.389507	-0.208267	-0.0163228	Fam184b	family with sequence similarity 184, member B
7	ENSMUSG00000015880	0.264505	0.294843	0.0912286	Ncapg	non-SMC condensin I complex, subunit G
9	ENSMUSG00000015882	-0.178043	0.221087	-0.087857	Lcorl	ligand dependent nuclear receptor corepressor-like
5	ENSMUSG00000015889	-0.0422041	0.192598	-0.236923	Lta4h	leukotriene A4 hydrolase
9	ENSMUSG00000015890	-0.388221	0.218622	-0.398385	Amdhd1	amidohydrolase domain containing 1
9	ENSMUSG00000015932	-0.175153	0.171618	-0.13153	Dstn	destrin
5	ENSMUSG00000015937	-0.127177	0.285018	-0.251746	Macroh2a1	macroH2A.1 histone
5	ENSMUSG00000015942	-0.170008	0.218543	-0.315777	Gtf2ird2	GTF2I repeat domain containing 2
5	ENSMUSG00000015943	-0.0834646	0.276436	-0.459164	Bola1	bolA-like 1 (E. coli)
9	ENSMUSG00000015944	-0.240431	0.158071	-0.166568	Castor2	cytosolic arginine sensor for mTORC1 subunit 2
6	ENSMUSG00000015947	0.723488	0.970841	-0.0555362	Fcgr1	Fc receptor, IgG, high affinity I
5	ENSMUSG00000015950	-0.169208	0.371483	-0.183695	Ncf1	neutrophil cytosolic factor 1
8	ENSMUSG00000015957	-0.489896	0.0534278	-0.747728	Wnt11	wingless-type MMTV integration site family, member 11
5	ENSMUSG00000015961	-0.152812	0.26567	-0.212776	Adss	adenylosuccinate synthetase, non muscle
2	ENSMUSG00000015962	-0.4	0.547393	-0.547393	1700016C15Rik	RIKEN cDNA 1700016C15 gene
5	ENSMUSG00000015966	-0.329353	0.324003	-0.506805	Il17rb	interleukin 17 receptor B
3	ENSMUSG00000015968	-0.709611	0.0168674	-0.221334	Cacna1d	calcium channel, voltage-dependent, L type, alpha 1D subunit
10	ENSMUSG00000015970	-0.164354	-0.0530525	-0.138918	Chdh	choline dehydrogenase
9	ENSMUSG00000015971	-0.211675	0.210127	-0.140993	Actr8	ARP8 actin-related protein 8
9	ENSMUSG00000015980	-0.250169	0.221991	-0.280176	Lrrc27	leucine rich repeat containing 27
5	ENSMUSG00000015981	0.0431457	0.47092	-0.44199	Stk32c	serine/threonine kinase 32C
9	ENSMUSG00000015994	-0.300797	0.147088	-0.143631	Fnta	farnesyltransferase, CAAX box, alpha
9	ENSMUSG00000016018	-0.1658	0.236836	-0.180274	Mtrex	Mtr4 exosome RNA helicase
1	ENSMUSG00000016024	0.0926999	-0.0791385	-0.217772	Lbp	lipopolysaccharide binding protein
9	ENSMUSG00000016028	-0.266647	0.162846	-0.0295312	Celsr1	cadherin, EGF LAG seven-pass G-type receptor 1
9	ENSMUSG00000016087	-0.258981	0.236153	-0.174484	Fli1	Friend leukemia integration 1
5	ENSMUSG00000016128	-0.0276054	0.11414	-0.39797	Stard13	StAR-related lipid transfer (START) domain containing 13
6	ENSMUSG00000016150	0.2	0.916992	-0.381378	Tenm1	teneurin transmembrane protein 1
12	ENSMUSG00000016179	0.233985	-0.2	0.2	Camk1g	calcium/calmodulin-dependent protein kinase I gamma
9	ENSMUSG00000016181	-0.210003	0.0549806	-0.274562	Utp25	UTP25 small subunit processome component
9	ENSMUSG00000016194	-0.14057	0.223629	-0.16108	Hsd11b1	hydroxysteroid 11-beta dehydrogenase 1
12	ENSMUSG00000016200	0.617231	0.25708	-0.0738558	Syt14	synaptotagmin XIV
7	ENSMUSG00000016206	-0.0169356	0.48973	-0.238786	H2-M3	histocompatibility 2, M region locus 3
7	ENSMUSG00000016239	-0.0304006	0.375549	0.117648	Lonrf3	LON peptidase N-terminal domain and ring finger 3
5	ENSMUSG00000016252	-0.175519	0.203018	-0.441952	Atp5e	ATP synthase, H+ transporting, mitochondrial F1 complex, epsilon subunit
10	ENSMUSG00000016253	-0.080164	0.130139	-0.0456762	Nelfcd	negative elongation factor complex member C/D, Th1l
7	ENSMUSG00000016255	0.175335	0.241584	-0.0771746	Tubb1	tubulin, beta 1 class VI
7	ENSMUSG00000016256	0.0184169	0.380825	-0.220921	Ctsz	cathepsin Z
5	ENSMUSG00000016257	0.0206535	0.160676	-0.286293	Prelid3b	PRELI domain containing 3B
10	ENSMUSG00000016262	-0.114387	-0.136385	0.0589487	Sertad4	SERTA domain containing 4
8	ENSMUSG00000016283	-0.520396	-0.216852	-0.460566	H2-M2	histocompatibility 2, M region locus 2
9	ENSMUSG00000016308	-0.258453	0.231195	-0.236658	Ube2a	ubiquitin-conjugating enzyme E2A
7	ENSMUSG00000016319	0.0389534	0.293793	-0.173408	Slc25a5	solute carrier family 25 (mitochondrial carrier, adenine nucleotide translocator), member 5
7	ENSMUSG00000016327	0	0.316993	0	Atp1b4	ATPase, (Na+)/K+ transporting, beta 4 polypeptide
5	ENSMUSG00000016344	-0.173424	0.234024	-0.436027	Ppdpf	pancreatic progenitor cell differentiation and proliferation factor
12	ENSMUSG00000016346	0.316993	0	0	Kcnq2	potassium voltage-gated channel, subfamily Q, member 2
10	ENSMUSG00000016349	0	0	0.2	Eef1a2	eukaryotic translation elongation factor 1 alpha 2
9	ENSMUSG00000016356	-0.334378	0.252204	-0.208372	Col20a1	collagen, type XX, alpha 1
9	ENSMUSG00000016382	-0.27062	0.0464449	-0.252182	Pls3	plastin 3 (T-isoform)
9	ENSMUSG00000016386	-0.516992	-0.0830075	-0.316993	Mpped2	metallophosphoesterase domain containing 2
9	ENSMUSG00000016409	-0.412719	0.198614	-0.158835	Nkap	NFKB activating protein
5	ENSMUSG00000016427	-0.262951	0.317891	-0.324819	Ndufa1	NADH:ubiquinone oxidoreductase subunit A1
1	ENSMUSG00000016458	-0.147569	-0.0395996	-0.321034	Wt1	WT1 transcription factor
7	ENSMUSG00000016477	0.00851348	0.25469	-0.155624	E2f3	E2F transcription factor 3
9	ENSMUSG00000016481	-0.272458	0.193025	-0.249211	Cr1l	complement component (3b/4b) receptor 1-like
9	ENSMUSG00000016487	-0.36227	0.239227	-0.101163	Ppfibp1	PTPRF interacting protein, binding protein 1 (liprin beta 1)
7	ENSMUSG00000016493	-0.144727	0.268524	0.189853	Cd46	CD46 antigen, complement regulatory protein
10	ENSMUSG00000016494	-0.0408213	0.0592146	-0.104605	Cd34	CD34 antigen
7	ENSMUSG00000016495	-0.0536825	0.242225	-0.189722	Plgrkt	plasminogen receptor, C-terminal lysine transmembrane protein
7	ENSMUSG00000016496	-0.0706406	0.377057	-0.0486454	Cd274	CD274 antigen
9	ENSMUSG00000016498	-0.205763	0.0410927	-0.0508487	Pdcd1lg2	programmed cell death 1 ligand 2
5	ENSMUSG00000016503	-0.169152	0.256579	-0.255572	Gtf3a	general transcription factor III A
9	ENSMUSG00000016510	-0.169182	0.237853	-0.215711	Mtif3	mitochondrial translational initiation factor 3
9	ENSMUSG00000016520	-0.177621	0.337117	-0.147735	Lnx2	ligand of numb-protein X 2
10	ENSMUSG00000016524	0	-0.316993	0	Il19	interleukin 19
12	ENSMUSG00000016526	0.871672	-0.199882	0.168839	Dyrk3	dual-specificity tyrosine-(Y)-phosphorylation regulated kinase 3
7	ENSMUSG00000016528	-0.0637533	0.367349	-0.195227	Mapkapk2	MAP kinase-activated protein kinase 2
3	ENSMUSG00000016529	-0.716922	0.174726	-0.0726094	Il10	interleukin 10
7	ENSMUSG00000016534	0.0213879	0.273985	-0.143947	Lamp2	lysosomal-associated membrane protein 2
5	ENSMUSG00000016541	-0.0444575	0.233245	-0.352231	Atxn10	ataxin 10
9	ENSMUSG00000016552	-0.255722	0.285215	-0.189984	Foxred2	FAD-dependent oxidoreductase domain containing 2
7	ENSMUSG00000016554	-0.079533	0.225018	-0.163406	Eif3d	eukaryotic translation initiation factor 3, subunit D
5	ENSMUSG00000016559	-0.101899	0.116705	-0.271373	H3f3b	H3.3 histone B
7	ENSMUSG00000016619	-0.0989204	0.230009	-0.062961	Nup50	nucleoporin 50
3	ENSMUSG00000016624	-0.630152	0.267526	-0.0154958	Phf21b	PHD finger protein 21B
10	ENSMUSG00000016626	0	0	0	Nlrp14	NLR family, pyrin domain containing 14
7	ENSMUSG00000016637	-0.0525702	0.223018	0.0343079	Ift27	intraflagellar transport 27
9	ENSMUSG00000016664	-0.113255	0.146992	-0.108259	Pacsin2	protein kinase C and casein kinase substrate in neurons 2
9	ENSMUSG00000016756	-0.442577	0.288941	-0.252883	Cmah	cytidine monophospho-N-acetylneuraminic acid hydroxylase
10	ENSMUSG00000016757	0.00897256	0.078263	-0.0171342	Ttll12	tubulin tyrosine ligase-like family, member 12
8	ENSMUSG00000016758	-0.725871	-0.132449	-0.716242	Bik	BCL2-interacting killer
7	ENSMUSG00000016763	0.0626843	0.159876	-0.133074	Scube1	signal peptide, CUB domain, EGF-like 1
9	ENSMUSG00000016831	-0.200344	0.282665	-0.208312	Tox4	TOX high mobility group box family member 4
5	ENSMUSG00000016833	-0.228811	0.279994	-0.412881	Mrps18c	mitochondrial ribosomal protein S18C
7	ENSMUSG00000016918	-0.0571897	0.25953	-0.0876607	Sulf1	sulfatase 1
9	ENSMUSG00000016921	-0.260313	0.191979	-0.236863	Srsf6	serine and arginine-rich splicing factor 6
9	ENSMUSG00000016933	-0.394233	0.108752	-0.259985	Plcg1	phospholipase C, gamma 1
5	ENSMUSG00000016940	-0.0742257	0.277209	-0.375484	Kctd2	potassium channel tetramerisation domain containing 2
5	ENSMUSG00000016942	-0.411779	0.441579	-0.380093	Tmprss6	transmembrane serine protease 6
9	ENSMUSG00000016946	-0.245587	0.220219	-0.221984	Kctd5	potassium channel tetramerisation domain containing 5
10	ENSMUSG00000016982	0.2	0	0	Pom121l2	POM121 transmembrane nucleoporin like 2
9	ENSMUSG00000016984	-0.172293	0.154167	-0.22329	Etaa1	Ewing tumor-associated antigen 1
13	ENSMUSG00000016995	-0.427501	-0.414679	-0.221383	Matn4	matrilin 4
10	ENSMUSG00000016998	0	0	0	Svs4	seminal vesicle secretory protein 4
7	ENSMUSG00000017000	0	0.2	0	Svs6	seminal vesicle secretory protein 6
5	ENSMUSG00000017002	0.246986	0.478481	-0.498806	Slpi	secretory leukocyte peptidase inhibitor
10	ENSMUSG00000017003	0	0	0	Svs3a	seminal vesicle secretory protein 3A
10	ENSMUSG00000017004	0	0	0	Svs5	seminal vesicle secretory protein 5
1	ENSMUSG00000017007	0.0571283	-0.143057	-0.34856	Rbpjl	recombination signal binding protein for immunoglobulin kappa J region-like
9	ENSMUSG00000017009	-0.299707	0.0151179	-0.103218	Sdc4	syndecan 4
10	ENSMUSG00000017049	0	0	0	Ccdc70	coiled-coil domain containing 70
9	ENSMUSG00000017057	-0.256699	0.0229582	-0.295485	Il13ra1	interleukin 13 receptor, alpha 1
10	ENSMUSG00000017064	0	0	0	Prl5a1	prolactin family 5, subfamily a, member 1
9	ENSMUSG00000017119	-0.223978	0.111291	-0.113753	Nbr1	NBR1, autophagy cargo receptor
5	ENSMUSG00000017132	-0.164363	0.251702	-0.304441	Cyth1	cytohesin 1
9	ENSMUSG00000017144	-0.200707	0.128552	-0.132509	Rnd3	Rho family GTPase 3
10	ENSMUSG00000017146	0.125129	0.0729337	0.166348	Brca1	breast cancer 1, early onset
10	ENSMUSG00000017165	0	0	0	Gast	gastrin
1	ENSMUSG00000017167	0.0886672	-0.197008	-0.573038	Cntnap1	contactin associated protein-like 1
9	ENSMUSG00000017176	-0.278252	0.221956	-0.246722	Nt5c3b	5'-nucleotidase, cytosolic IIIB
5	ENSMUSG00000017188	-0.0795078	0.209178	-0.241128	Coa3	cytochrome C oxidase assembly factor 3
9	ENSMUSG00000017195	-0.307077	0.377073	-0.119122	Zpbp2	zona pellucida binding protein 2
12	ENSMUSG00000017204	0.6	0	0	Gsdma	gasdermin A
5	ENSMUSG00000017210	-0.0756167	0.20553	-0.236705	Med24	mediator complex subunit 24
10	ENSMUSG00000017211	0	0	0	Gsdma2	gasdermin A2
5	ENSMUSG00000017221	-0.0874887	0.237026	-0.268593	Psmd3	proteasome (prosome, macropain) 26S subunit, non-ATPase, 3
5	ENSMUSG00000017264	-0.0752424	0.192007	-0.190917	Exosc10	exosome component 10
5	ENSMUSG00000017286	-0.170107	0.229261	-0.343747	Glod4	glyoxalase domain containing 4
7	ENSMUSG00000017288	-0.0775357	0.256518	-0.097315	Vps53	VPS53 GARP complex subunit
9	ENSMUSG00000017291	-0.336289	0.292426	-0.155641	Taok1	TAO kinase 1
10	ENSMUSG00000017299	0.0369492	0.113513	-0.108893	Dnttip1	deoxynucleotidyltransferase, terminal, interacting protein 1
13	ENSMUSG00000017300	-0.769599	-0.433985	0.316993	Tnnc2	troponin C2, fast
5	ENSMUSG00000017307	-0.0709434	0.0988832	-0.322701	Acot8	acyl-CoA thioesterase 8
9	ENSMUSG00000017309	-0.185062	0.302496	-0.151487	Cd300lg	CD300 molecule like family member G
10	ENSMUSG00000017310	0.0830075	0	-0.0830075	Spint4	serine protease inhibitor, Kunitz type 4
7	ENSMUSG00000017311	0	0.2	0	Pyy	peptide YY
12	ENSMUSG00000017314	0.332628	-0.170893	0.131766	Mpp2	membrane protein, palmitoylated 2 (MAGUK p55 subfamily member 2)
10	ENSMUSG00000017316	0	0	0	Ppy	pancreatic polypeptide
4	ENSMUSG00000017344	0.2	-1.31699	-0.316993	Vtn	vitronectin
9	ENSMUSG00000017376	-0.232148	0.158474	-0.151499	Nlk	nemo like kinase
5	ENSMUSG00000017386	-0.153569	0.183701	-0.413276	Traf4	TNF receptor associated factor 4
14	ENSMUSG00000017390	-0.30958	0.715575	-0.244478	Aldoc	aldolase C, fructose-bisphosphate
2	ENSMUSG00000017400	-0.237362	0.407672	-0.699031	Stac2	SH3 and cysteine rich domain 2
5	ENSMUSG00000017404	-0.00203963	0.336028	-0.351629	Rpl19	ribosomal protein L19
9	ENSMUSG00000017405	-0.283328	0.051934	-0.200926	Nek8	NIMA (never in mitosis gene a)-related expressed kinase 8
5	ENSMUSG00000017412	-0.0769145	0.246502	-0.22448	Cacnb4	calcium channel, voltage-dependent, beta 4 subunit
9	ENSMUSG00000017417	-0.144733	0.242687	-0.172629	Plxdc1	plexin domain containing 1
9	ENSMUSG00000017418	-0.49272	0.274508	-0.191618	Arl5b	ADP-ribosylation factor-like 5B
9	ENSMUSG00000017421	-0.242354	0.155209	-0.164832	Zfp207	zinc finger protein 207
9	ENSMUSG00000017428	-0.178189	0.127666	-0.180522	Psmd11	proteasome (prosome, macropain) 26S subunit, non-ATPase, 11
9	ENSMUSG00000017446	-0.176062	0.213947	-0.143749	C1qtnf1	C1q and tumor necrosis factor related protein 1
14	ENSMUSG00000017453	-0.294671	1.50449	-0.0186219	Pipox	pipecolic acid oxidase
10	ENSMUSG00000017466	-0.0968013	0.108784	-0.0249863	Timp2	tissue inhibitor of metalloproteinase 2
9	ENSMUSG00000017478	-0.152878	0.197715	-0.210036	Zc3h18	zinc finger CCCH-type containing 18
9	ENSMUSG00000017485	-0.32344	0.235429	-0.133945	Top2b	topoisomerase (DNA) II beta
9	ENSMUSG00000017491	-0.0962578	0.0996109	-0.146918	Rarb	retinoic acid receptor, beta
1	ENSMUSG00000017493	-0.101864	0.0178408	-0.216548	Igfbp4	insulin-like growth factor binding protein 4
12	ENSMUSG00000017499	0.224133	-0.173113	0.26876	Cdc6	cell division cycle 6
9	ENSMUSG00000017548	-0.240886	0.298832	-0.0965035	Suz12	SUZ12 polycomb repressive complex 2 subunit
10	ENSMUSG00000017550	0.0522647	0.1433	0.0950718	Atad5	ATPase family, AAA domain containing 5
9	ENSMUSG00000017561	-0.297223	0.253762	-0.244123	Crlf3	cytokine receptor-like factor 3
10	ENSMUSG00000017588	0	0	0	Krt27	keratin 27
11	ENSMUSG00000017607	0.315637	0.144464	-0.464386	Tns4	tensin 4
9	ENSMUSG00000017615	-0.278931	0.0886139	-0.199328	Tnfaip1	tumor necrosis factor, alpha-induced protein 1 (endothelial)
7	ENSMUSG00000017631	-0.175048	0.348285	-0.0784972	Abr	active BCR-related gene
5	ENSMUSG00000017639	-0.217525	0.424303	-0.364465	Rab11fip4	RAB11 family interacting protein 4 (class II)
9	ENSMUSG00000017652	-0.163962	0.179675	-0.138407	Cd40	CD40 antigen
5	ENSMUSG00000017664	-0.0239895	0.165304	-0.217296	Slc35c2	solute carrier family 35, member C2
15	ENSMUSG00000017667	-0.301321	0.442836	0.315687	Zfp334	zinc finger protein 334
7	ENSMUSG00000017670	-0.0590723	0.366619	-0.109208	Elmo2	engulfment and cell motility 2
9	ENSMUSG00000017677	-0.255762	0.3128	-0.227706	Wsb1	WD repeat and SOCS box-containing 1
9	ENSMUSG00000017679	-0.341737	0.226897	-0.18713	Ttpal	tocopherol (alpha) transfer protein-like
9	ENSMUSG00000017686	-0.212691	0.136879	-0.11374	Rhot1	ras homolog family member T1
10	ENSMUSG00000017688	0.2	0	0	Hnf4g	hepatocyte nuclear factor 4, gamma
9	ENSMUSG00000017692	-0.180102	0.150351	-0.157944	Rhbdl3	rhomboid like 3
14	ENSMUSG00000017697	-0.125288	0.691379	-0.143511	Ada	adenosine deaminase
9	ENSMUSG00000017707	-0.150073	0.139087	-0.181327	Serinc3	serine incorporator 3
9	ENSMUSG00000017713	-0.164023	0.0746269	-0.223488	Tha1	threonine aldolase 1
5	ENSMUSG00000017715	-0.156479	0.285828	-0.236522	Pgs1	phosphatidylglycerophosphate synthase 1
10	ENSMUSG00000017716	0.22152	-0.288673	0.0469837	Birc5	baculoviral IAP repeat-containing 5
1	ENSMUSG00000017718	-0.0695458	0.0158709	-0.407088	Afmid	arylformamidase
2	ENSMUSG00000017720	-0.3644	0.633985	-0.418622	Trp53tg5	transformation related protein 53 target 5
5	ENSMUSG00000017721	-0.0756238	0.264842	-0.26751	Pigt	phosphatidylinositol glycan anchor biosynthesis, class T
1	ENSMUSG00000017723	0	0	-0.2	Wfdc2	WAP four-disulfide core domain 2
14	ENSMUSG00000017724	-0.664386	0.961471	0	Etv4	ets variant 4
10	ENSMUSG00000017733	0	0	0	Eppin	epididymal peptidase inhibitor
9	ENSMUSG00000017734	-0.201511	0.00276116	-0.1322	Dbndd2	dysbindin (dystrobrevin binding protein 1) domain containing 2
1	ENSMUSG00000017737	0.0414232	0.120377	-0.248246	Mmp9	matrix metallopeptidase 9
11	ENSMUSG00000017740	0.160626	-0.393564	-0.813136	Slc12a5	solute carrier family 12, member 5
5	ENSMUSG00000017747	-0.204584	0.14671	-0.602083	Ghdc	GH3 domain containing
5	ENSMUSG00000017754	-0.0736066	0.152063	-0.329387	Pltp	phospholipid transfer protein
9	ENSMUSG00000017756	-0.303137	0.170653	-0.28952	Slc12a7	solute carrier family 12, member 7
7	ENSMUSG00000017760	-0.0600632	0.23586	-0.192658	Ctsa	cathepsin A
9	ENSMUSG00000017764	-0.236335	0.236858	-0.254115	Zswim1	zinc finger SWIM-type containing 1
9	ENSMUSG00000017765	-0.180907	0.187746	-0.141452	Slc12a4	solute carrier family 12, member 4
3	ENSMUSG00000017767	-0.663635	0.476217	-0.281033	Spata25	spermatogenesis associated 25
9	ENSMUSG00000017774	-0.293416	0.242617	-0.181347	Myo1c	myosin IC
9	ENSMUSG00000017776	-0.271056	0.259253	-0.186183	Crk	v-crk avian sarcoma virus CT10 oncogene homolog
5	ENSMUSG00000017778	-0.199605	0.192559	-0.522029	Cox7c	cytochrome c oxidase subunit 7C
9	ENSMUSG00000017781	-0.264818	0.184093	-0.223206	Pitpna	phosphatidylinositol transfer protein, alpha
5	ENSMUSG00000017801	-0.18054	0.242439	-0.249788	Mlx	MAX-like protein X
9	ENSMUSG00000017802	-0.24609	0.151272	-0.255756	Retreg3	reticulophagy regulator family member 3
8	ENSMUSG00000017817	-0.48145	0.15696	-0.583176	Jph2	junctophilin 2
6	ENSMUSG00000017830	1.57875	1.39783	-0.387325	Dhx58	DEXH (Asp-Glu-X-His) box polypeptide 58
7	ENSMUSG00000017831	-0.116598	0.193123	-0.0891915	Rab5a	RAB5A, member RAS oncogene family
1	ENSMUSG00000017832	0.116992	-0.135614	-0.581378	Hspb9	heat shock protein, alpha-crystallin-related, B9
5	ENSMUSG00000017837	-0.138672	0.280263	-0.288316	Nkiras2	NFKB inhibitor interacting Ras-like protein 2
9	ENSMUSG00000017843	-0.153431	0.279817	-0.160372	Ppp2r5c	protein phosphatase 2, regulatory subunit B', gamma
5	ENSMUSG00000017858	-0.146289	0.214827	-0.231954	Ift52	intraflagellar transport 52
10	ENSMUSG00000017861	0.174128	0.0742046	0.0429992	Mybl2	myeloblastosis oncogene-like 2
9	ENSMUSG00000017868	-0.4	-0.116992	-0.116992	Sgk2	serum/glucocorticoid regulated kinase 2
9	ENSMUSG00000017897	-0.437374	0.167954	-0.16633	Eya2	EYA transcriptional coactivator and phosphatase 2
10	ENSMUSG00000017914	0	0	0	No associated gene
10	ENSMUSG00000017922	0	0	0	Prl3c1	prolactin family 3, subfamily c, member 1
5	ENSMUSG00000017929	0.00610506	0.458343	-0.285155	B4galt5	UDP-Gal:betaGlcNAc beta 1,4-galactosyltransferase, polypeptide 5
15	ENSMUSG00000017943	0.316993	0.4	0.633985	Gdap1l1	ganglioside-induced differentiation-associated protein 1-like 1
11	ENSMUSG00000017950	0.550978	0.0842928	-0.6	Hnf4a	hepatic nuclear factor 4, alpha
13	ENSMUSG00000017969	-0.0787009	-0.378617	0.118845	Ptgis	prostaglandin I2 (prostacyclin) synthase
9	ENSMUSG00000017978	-0.275066	0.184355	0.120737	Cadps2	Ca2+-dependent activator protein for secretion 2
9	ENSMUSG00000017999	-0.168522	0.116091	-0.292113	Ddx27	DEAD box helicase 27
9	ENSMUSG00000018001	-0.270858	0.0434158	-0.112238	Cyth3	cytohesin 3
9	ENSMUSG00000018008	-0.268332	0.333707	-0.201452	Cyth4	cytohesin 4
3	ENSMUSG00000018012	-0.756272	-0.0970854	-0.154236	Rac3	Rac family small GTPase 3
5	ENSMUSG00000018040	-0.0869886	0.276698	-0.328206	Rrp7a	ribosomal RNA processing 7 homolog A
5	ENSMUSG00000018042	-0.108824	0.139961	-0.24295	Cyb5r3	cytochrome b5 reductase 3
9	ENSMUSG00000018068	-0.347696	0.192036	-0.155655	Ints2	integrator complex subunit 2
9	ENSMUSG00000018076	-0.193731	0.117665	-0.102447	Med13l	mediator complex subunit 13-like
1	ENSMUSG00000018102	0.0572426	-0.0943438	-0.203401	H2bc4	H2B clustered histone 4
11	ENSMUSG00000018126	0.516992	-0.2	-0.516992	Baiap2l2	BAI1-associated protein 2-like 2
7	ENSMUSG00000018143	0.124801	0.18236	-0.233834	Mafk	v-maf musculoaponeurotic fibrosarcoma oncogene family, protein K (avian)
9	ENSMUSG00000018160	-0.275541	0.274208	-0.105458	Med1	mediator complex subunit 1
5	ENSMUSG00000018166	-0.0628732	0.213703	-0.23095	Erbb3	erb-b2 receptor tyrosine kinase 3
5	ENSMUSG00000018167	-0.0858322	0.255191	-0.351043	Stard3	START domain containing 3
9	ENSMUSG00000018168	-0.248102	0.340948	-0.139564	Ikzf3	IKAROS family zinc finger 3
9	ENSMUSG00000018169	-0.326095	0.202934	-0.329473	Mfng	MFNG O-fucosylpeptide 3-beta-N-acetylglucosaminyltransferase
9	ENSMUSG00000018171	-0.0767375	0.165405	-0.187476	Vmp1	vacuole membrane protein 1
9	ENSMUSG00000018189	-0.176812	0.180918	-0.204076	Uchl5	ubiquitin carboxyl-terminal esterase L5
9	ENSMUSG00000018196	-0.377637	0.163122	-0.253715	Glrx2	glutaredoxin 2 (thioltransferase)
9	ENSMUSG00000018199	-0.280396	0.340317	-0.147941	Ro60	Ro60, Y RNA binding protein
9	ENSMUSG00000018209	-0.341227	0.242454	-0.125731	Stk4	serine/threonine kinase 4
10	ENSMUSG00000018211	0	-0.2	0	Wfdc15b	WAP four-disulfide core domain 15B
9	ENSMUSG00000018217	-0.206792	0.107287	-0.131707	Pmp22	peripheral myelin protein 22
9	ENSMUSG00000018238	-0.381378	0.374143	0.135614	Gdf9	growth differentiation factor 9
5	ENSMUSG00000018239	-0.216832	0.254902	-0.403429	Zcchc10	zinc finger, CCHC domain containing 10
10	ENSMUSG00000018259	0	0	0.2	Prl8a2	prolactin family 8, subfamily a, member 2
13	ENSMUSG00000018263	-0.2	-0.2	0.2	Tbx5	T-box 5
5	ENSMUSG00000018286	-0.137711	0.344086	-0.327803	Psmb6	proteasome (prosome, macropain) subunit, beta type 6
1	ENSMUSG00000018287	-0.0645431	0.06895	-0.298873	Spag7	sperm associated antigen 7
5	ENSMUSG00000018293	-0.0916811	0.24512	-0.329068	Pfn1	profilin 1
9	ENSMUSG00000018322	-0.270768	0.273618	-0.195712	Tomm34	translocase of outer mitochondrial membrane 34
9	ENSMUSG00000018326	-0.189802	0.186983	-0.172118	Ywhab	tyrosine 3-monooxygenase/tryptophan 5-monooxygenase activation protein, beta polypeptide
7	ENSMUSG00000018334	-0.0366312	0.40687	-0.161679	Ksr1	kinase suppressor of ras 1
1	ENSMUSG00000018339	0.00793457	-0.167783	-0.552119	Gpx3	glutathione peroxidase 3
5	ENSMUSG00000018340	-0.0890585	0.359155	-0.299603	Anxa6	annexin A6
10	ENSMUSG00000018341	-0.0430145	0.184491	0.157151	Il12rb2	interleukin 12 receptor, beta 2
5	ENSMUSG00000018347	-0.262069	0.234739	-0.414212	Zkscan6	zinc finger with KRAB and SCAN domains 6
7	ENSMUSG00000018362	0.133366	0.143218	-0.143545	Kpna2	karyopherin (importin) alpha 2
9	ENSMUSG00000018363	-0.274812	0.265889	-0.234608	Smurf2	SMAD specific E3 ubiquitin protein ligase 2
9	ENSMUSG00000018372	-0.317413	0.0790661	-0.186359	Cep95	centrosomal protein 95
9	ENSMUSG00000018377	-0.287973	0.218699	-0.0875444	Vezf1	vascular endothelial zinc finger 1
5	ENSMUSG00000018378	-0.138215	0.233829	-0.454663	Cuedc1	CUE domain containing 1
9	ENSMUSG00000018379	-0.259885	0.149979	-0.159004	Srsf1	serine and arginine-rich splicing factor 1
7	ENSMUSG00000018381	0.0905715	0.290102	-0.188638	Abi3	ABI family member 3
12	ENSMUSG00000018387	0.219907	-0.135614	0.135614	Shroom1	shroom family member 1
3	ENSMUSG00000018395	-0.558256	0.208617	-0.0207755	Kif3a	kinesin family member 3A
10	ENSMUSG00000018398	-0.122959	-0.0963805	-0.0170083	Septin8	septin 8
7	ENSMUSG00000018401	-0.123472	0.276362	-0.0252001	Mtmr4	myotubularin related protein 4
9	ENSMUSG00000018405	-0.257264	-0.0500474	-0.285471	Mrm1	mitochondrial rRNA methyltransferase 1
13	ENSMUSG00000018411	-0.725871	-0.414731	-0.050169	Mapt	microtubule-associated protein tau
9	ENSMUSG00000018412	-0.229018	0.218013	-0.117292	Kansl1	KAT8 regulatory NSL complex subunit 1
9	ENSMUSG00000018415	-0.365944	0.13358	-0.0823531	Gid4	GID complex subunit 4, VID24 homolog
9	ENSMUSG00000018417	-0.20252	0.016766	-0.174727	Myo1b	myosin IB
9	ENSMUSG00000018425	-0.196852	0.11674	-0.194739	Dhx40	DEAH (Asp-Glu-Ala-His) box polypeptide 40
9	ENSMUSG00000018427	-0.244266	0.178468	-0.0436497	Ypel2	yippee like 2
9	ENSMUSG00000018428	-0.370842	0.201488	-0.0621836	Akap1	A kinase (PRKA) anchor protein 1
9	ENSMUSG00000018433	-0.237647	0.202719	-0.210444	Nol11	nucleolar protein 11
9	ENSMUSG00000018442	-0.260298	0.188016	-0.211164	Derl2	Der1-like domain family, member 2
9	ENSMUSG00000018446	-0.126299	0.185728	-0.193523	C1qbp	complement component 1, q subcomponent binding protein
1	ENSMUSG00000018449	-0.185842	-0.0397773	-0.323134	Rpain	RPA interacting protein
9	ENSMUSG00000018451	-0.395347	0.332426	-0.175547	6330403K07Rik	RIKEN cDNA 6330403K07 gene
14	ENSMUSG00000018459	-0.33107	0.716993	-0.427501	Slc13a3	solute carrier family 13 (sodium-dependent dicarboxylate transporter), member 3
15	ENSMUSG00000018470	-0.159172	-0.242934	0.525871	Kcnab3	potassium voltage-gated channel, shaker-related subfamily, beta member 3
9	ENSMUSG00000018474	-0.28383	0.00931419	-0.134739	Chd3	chromodomain helicase DNA binding protein 3
9	ENSMUSG00000018476	-0.221806	0.11827	-0.255345	Kdm6b	KDM1 lysine (K)-specific demethylase 6B
7	ENSMUSG00000018479	0.2	0.316993	0	Chct1	CHD1 helical C-terminal domain containing 1
9	ENSMUSG00000018481	-0.303985	0.304592	-0.167755	Appbp2	amyloid beta precursor protein (cytoplasmic tail) binding protein 2
15	ENSMUSG00000018486	-0.211779	-0.116992	0.316993	Wnt9b	wingless-type MMTV integration site family, member 9B
3	ENSMUSG00000018500	-0.761471	0.335614	-0.574143	Adora2b	adenosine A2b receptor
9	ENSMUSG00000018501	-0.243171	0.212164	-0.0982357	Ncor1	nuclear receptor co-repressor 1
9	ENSMUSG00000018507	-0.24289	0.214007	-0.266135	Trpv2	transient receptor potential cation channel, subfamily V, member 2
10	ENSMUSG00000018509	0.154503	-0.132185	-0.0281127	Cenpv	centromere protein V
1	ENSMUSG00000018537	-0.282825	-0.179114	-0.372367	Pcgf2	polycomb group ring finger 2
9	ENSMUSG00000018541	-0.213504	0.123319	-0.162689	Cwc25	CWC25 spliceosome-associated protein
8	ENSMUSG00000018543	-0.483007	-0.528771	-1.18138	1700001P01Rik	RIKEN cDNA 1700001P01 gene
9	ENSMUSG00000018547	-0.251292	0.3521	-0.110835	Pip4k2b	phosphatidylinositol-5-phosphate 4-kinase, type II, beta
9	ENSMUSG00000018548	-0.149066	0.177068	-0.0630468	Trim37	tripartite motif-containing 37
8	ENSMUSG00000018554	-0.0490225	-0.3369	-1.22586	Ybx2	Y box protein 2
5	ENSMUSG00000018559	-0.115015	0.249862	-0.29874	Ctdnep1	CTD nuclear envelope phosphatase 1
5	ENSMUSG00000018565	-0.0745866	0.14059	-0.374116	Elp5	elongator acetyltransferase complex subunit 5
4	ENSMUSG00000018566	0.253009	-0.977098	0.22608	Slc2a4	solute carrier family 2 (facilitated glucose transporter), member 4
5	ENSMUSG00000018567	-0.0634974	0.192831	-0.250955	Gabarap	gamma-aminobutyric acid receptor associated protein
11	ENSMUSG00000018569	0.815363	0.645764	-0.988972	Cldn7	claudin 7
15	ENSMUSG00000018570	-0.466253	0	0.210306	2810408A11Rik	RIKEN cDNA 2810408A11 gene
5	ENSMUSG00000018572	-0.201733	0.229444	-0.281773	Phf23	PHD finger protein 23
9	ENSMUSG00000018574	-0.299681	0.118247	-0.294107	Acadvl	acyl-Coenzyme A dehydrogenase, very long chain
7	ENSMUSG00000018581	0.232263	0.303594	-0.233353	Dnah11	dynein, axonemal, heavy chain 11
9	ENSMUSG00000018583	-0.231054	0.237073	-0.211582	G3bp1	GTPase activating protein (SH3 domain) binding protein 1
5	ENSMUSG00000018585	0.0703553	0.175109	-0.392739	Atox1	antioxidant 1 copper chaperone
7	ENSMUSG00000018589	0	0.316993	0	Glra2	glycine receptor, alpha 2 subunit
10	ENSMUSG00000018593	-0.0511768	-0.0580279	-0.0274399	Sparc	secreted acidic cysteine rich glycoprotein
13	ENSMUSG00000018595	-0.403584	-0.4	-0.116992	Glra4	glycine receptor, alpha 4 subunit
5	ENSMUSG00000018599	-0.128225	0.190493	-0.390712	Mief2	mitochondrial elongation factor 2
9	ENSMUSG00000018604	-0.228462	0.0547217	-0.00461911	Tbx3	T-box 3
7	ENSMUSG00000018620	-0.2	0.4	0.2	Mmp20	matrix metallopeptidase 20 (enamelysin)
4	ENSMUSG00000018623	0	-0.633985	-0.2	Mmp7	matrix metallopeptidase 7
7	ENSMUSG00000018634	-0.112448	0.350119	0.00519904	Crhr1	corticotropin releasing hormone receptor 1
11	ENSMUSG00000018648	0.59202	0.167589	-0.580093	Dusp14	dual specificity phosphatase 14
5	ENSMUSG00000018651	0.0226165	0.241749	-0.266971	Tada2a	transcriptional adaptor 2A
9	ENSMUSG00000018654	-0.183383	0.289874	-0.136722	Ikzf1	IKAROS family zinc finger 1
15	ENSMUSG00000018656	-0.4	0.516992	0.716993	Tcaf3	TRPM8 channel-associated factor 3
1	ENSMUSG00000018659	0.292924	-0.318487	-0.226309	Pnpo	pyridoxine 5'-phosphate oxidase
5	ENSMUSG00000018661	-0.0547356	0.196049	-0.212422	Cog1	component of oligomeric golgi complex 1
9	ENSMUSG00000018666	-0.23711	0.104187	-0.195496	Cbx1	chromobox 1
5	ENSMUSG00000018669	-0.0355783	0.126189	-0.305426	Cdk5rap3	CDK5 regulatory subunit associated protein 3
7	ENSMUSG00000018672	-0.152303	0.385187	0.126635	Copz2	coatomer protein complex, subunit zeta 2
1	ENSMUSG00000018677	0.275091	-0.0778947	-0.174806	Slc25a39	solute carrier family 25, member 39
7	ENSMUSG00000018678	0.00624653	0.176477	-0.0721663	Sp2	Sp2 transcription factor
5	ENSMUSG00000018697	-0.129351	0.170033	-0.296051	Aatf	apoptosis antagonizing transcription factor
2	ENSMUSG00000018698	0	0.433985	-0.916992	Lhx1	LIM homeobox protein 1
7	ENSMUSG00000018707	-0.197261	0.281509	-0.00575084	Dync1h1	dynein cytoplasmic 1 heavy chain 1
3	ENSMUSG00000018727	-0.679746	-0.124418	-0.13891	Cpsf4l	cleavage and polyadenylation specific factor 4-like
9	ENSMUSG00000018733	-0.415496	0.0801541	-0.165952	Pex12	peroxisomal biogenesis factor 12
9	ENSMUSG00000018736	-0.176607	0.195792	-0.219735	Ndel1	nudE neurodevelopment protein 1 like 1
7	ENSMUSG00000018740	-0.0380745	0.167265	-0.023569	Slc25a35	solute carrier family 25, member 35
9	ENSMUSG00000018750	-0.264414	0.144146	-0.22706	Zbtb4	zinc finger and BTB domain containing 4
10	ENSMUSG00000018752	0	0	0	Tnfsfm13	tumor necrosis factor (ligand) superfamily, membrane-bound member 13
5	ENSMUSG00000018761	-0.074832	0.239184	-0.384041	Mpdu1	mannose-P-dolichol utilization defect 1
9	ENSMUSG00000018765	-0.20682	0.174076	-0.20503	Fxr2	FMR1 autosomal homolog 2
5	ENSMUSG00000018770	-0.154491	0.269525	-0.365006	Atp5g3	ATP synthase, H+ transporting, mitochondrial F0 complex, subunit C3 (subunit 9)
[truncated: 37,018 more rows]

## Sheet: Cluster 1
Gene ID	Day 4	Day 7	Day 35	Symbol	Name
ENSMUSG00000097827	0.0571509	-0.296292	-0.737979	5330439K02Rik	RIKEN cDNA 5330439K02 gene
ENSMUSG00000089414	0	0	-0.716993	No associated gene
ENSMUSG00000065130	0	-0.2	-0.716993	Gm24457	predicted gene, 24457
ENSMUSG00000083971	0	-0.135614	-0.716993	Gm5943	predicted pseudogene 5943
ENSMUSG00000042567	0.0830075	-0.4	-0.716993	Nek10	NIMA (never in mitosis gene a)- related kinase 10
ENSMUSG00000030310	0.0643856	-0.361471	-0.716993	Slc6a1	solute carrier family 6 (neurotransmitter transporter, GABA), member 1
ENSMUSG00000064637	-0.0490225	0	-0.716993	Snora20	small nucleolar RNA, H/ACA box 20
ENSMUSG00000039476	-0.0266798	0.0360911	-0.71596	Prrx2	paired related homeobox 2
ENSMUSG00000054200	0.0170732	-0.0154336	-0.705214	Ffar4	free fatty acid receptor 4
ENSMUSG00000024446	-0.0165547	0.0353004	-0.698442	Rpp21	ribonuclease P 21 subunit
ENSMUSG00000002289	0.0225685	-0.0107858	-0.683173	Angptl4	angiopoietin-like 4
ENSMUSG00000097592	0.0830075	-0.430401	-0.683007	4930500F10Rik	RIKEN cDNA 4930500F10 gene
ENSMUSG00000051076	0.116992	-0.464386	-0.683007	Vtcn1	V-set domain containing T cell activation inhibitor 1
ENSMUSG00000042265	0.0555068	-0.217387	-0.66725	Trem1	triggering receptor expressed on myeloid cells 1
ENSMUSG00000037188	0	-0.0830075	-0.664386	Grhl3	grainyhead like transcription factor 3
ENSMUSG00000068037	0.116992	-0.169599	-0.664386	Mas1	MAS1 oncogene
ENSMUSG00000046402	0.0923161	-0.330664	-0.662074	Rbp1	retinol binding protein 1, cellular
ENSMUSG00000085972	0	-0.0081284	-0.647408	1110028F11Rik	RIKEN cDNA 1110028F11 gene
ENSMUSG00000065663	-0.0711301	-0.0205383	-0.643135	Gm22579	predicted gene, 22579
ENSMUSG00000026390	-0.155479	-0.00813253	-0.641785	Marco	macrophage receptor with collagenous structure
ENSMUSG00000060380	-0.116992	0.0280355	-0.638529	C030014I23Rik	RIKEN cDNA C030014I23 gene
ENSMUSG00000095676	0	-0.2	-0.633985	No associated gene
ENSMUSG00000094167	-0.0970854	-0.116992	-0.633985	Gm10580	predicted gene 10580
ENSMUSG00000092805	0.0526069	-0.283008	-0.633985	Gm26461	predicted gene, 26461
ENSMUSG00000064349	0.116992	-0.169599	-0.633985	mt-Tc	mitochondrially encoded tRNA cysteine
ENSMUSG00000073295	0	-0.116992	-0.633985	Nudt11	nudix hydrolase 11
ENSMUSG00000077239	0.0830075	0	-0.633985	Snord66	small nucleolar RNA, C/D box 66
ENSMUSG00000086938	-0.0395948	-0.0100081	-0.627501	4930481A15Rik	RIKEN cDNA 4930481A15 gene
ENSMUSG00000083004	-0.125121	-0.0320447	-0.627165	Gm13413	predicted gene 13413
ENSMUSG00000058145	-0.0608012	-0.106103	-0.622206	Adamts17	a disintegrin-like and metallopeptidase (reprolysin type) with thrombospondin type 1 motif, 17
ENSMUSG00000030555	-0.00723647	0.00298388	-0.619194	Ttc23	tetratricopeptide repeat domain 23
ENSMUSG00000093874	0.0399345	-0.0748791	-0.618622	No associated gene
ENSMUSG00000025739	0.16398	-0.391206	-0.618292	Gng13	guanine nucleotide binding protein (G protein), gamma 13
ENSMUSG00000055323	-0.0356951	-0.0567237	-0.616886	Gm9967	predicted gene 9967
ENSMUSG00000037032	0.0128987	-0.00759357	-0.610212	Apbb1	amyloid beta (A4) precursor protein-binding, family B, member 1
ENSMUSG00000023902	0.0526069	-0.53107	-0.608056	Zscan10	zinc finger and SCAN domain containing 10
ENSMUSG00000041012	0.0186219	-0.316993	-0.606484	Cmtm8	CKLF-like MARVEL transmembrane domain containing 8
ENSMUSG00000022887	0	-0.444478	-0.603584	Masp1	mannan-binding lectin serine peptidase 1
ENSMUSG00000064704	0	0	-0.6	No associated gene
ENSMUSG00000089082	0	-0.4	-0.6	No associated gene
ENSMUSG00000096563	0	-0.452607	-0.6	No associated gene
ENSMUSG00000097824	-0.0304006	-0.4	-0.6	No associated gene
ENSMUSG00000098840	0	-0.316993	-0.6	No associated gene
ENSMUSG00000098230	0.116992	-0.116992	-0.6	1700095B10Rik	RIKEN cDNA 1700095B10 gene
ENSMUSG00000045877	-0.0304006	0.0643856	-0.6	4933415A04Rik	RIKEN cDNA 4933415A04 gene
ENSMUSG00000004360	0	-0.2	-0.6	9330159F19Rik	RIKEN cDNA 9330159F19 gene
ENSMUSG00000060317	0.2	-0.4	-0.6	Acnat2	acyl-coenzyme A amino acid N-acyltransferase 2
ENSMUSG00000042269	0	0	-0.6	Cibar2	CBY1 interacting BAR domain containing 2
ENSMUSG00000022053	0	-0.4	-0.6	Ebf2	early B cell factor 2
ENSMUSG00000040055	0	0	-0.6	Gjb6	gap junction protein, beta 6
ENSMUSG00000082893	0	0	-0.6	Gm11383	predicted gene 11383
ENSMUSG00000086665	0	-0.2	-0.6	Gm13067	predicted gene 13067
ENSMUSG00000085275	0	0	-0.6	Gm14487	predicted gene 14487
ENSMUSG00000092480	-0.0830075	-0.116992	-0.6	Gm20495	predicted gene 20495
ENSMUSG00000088695	-0.0830075	0	-0.6	Gm22334	predicted gene, 22334
ENSMUSG00000088018	0.0830075	-0.116992	-0.6	Gm23390	predicted gene, 23390
ENSMUSG00000059003	0.116992	0	-0.6	Grin2a	glutamate receptor, ionotropic, NMDA2A (epsilon 1)
ENSMUSG00000028946	0	0	-0.6	Hes3	hes family bHLH transcription factor 3
ENSMUSG00000080662	0	-0.2	-0.6	Mir1b	microRNA 1b
ENSMUSG00000092958	-0.116992	-0.116992	-0.6	Mir5128	microRNA 5128
ENSMUSG00000050650	0	-0.2	-0.6	Mrgpra1	MAS-related GPR, member A1
ENSMUSG00000020469	0.116992	0	-0.6	Myl7	myosin, light polypeptide 7, regulatory
ENSMUSG00000042306	0	-0.0830075	-0.6	S100a14	S100 calcium binding protein A14
ENSMUSG00000048856	0.106499	-0.0466574	-0.6	Slc25a47	solute carrier family 25, member 47
ENSMUSG00000010122	0	0	-0.6	Slc47a1	solute carrier family 47, member 1
ENSMUSG00000077563	0.0865919	-0.0830075	-0.6	Snora68	small nucleolar RNA, H/ACA box 68
ENSMUSG00000057072	0.116992	-0.316993	-0.6	Spata45	spermatogenesis associated 45
ENSMUSG00000041566	0.116992	-0.316993	-0.6	Tssk1	testis-specific serine kinase 1
ENSMUSG00000018821	-0.0448149	-0.0841416	-0.598069	Avpi1	arginine vasopressin-induced 1
ENSMUSG00000022671	-0.086914	0.0427187	-0.597613	Mzt2	mitotic spindle organizing protein 2
ENSMUSG00000063145	-0.00742623	-0.333295	-0.597147	Bbs5	Bardet-Biedl syndrome 5 (human)
ENSMUSG00000097591	0.0304006	-0.0830075	-0.595456	A330032B11Rik	RIKEN cDNA A330032B11 gene
ENSMUSG00000026700	0.072514	-0.213423	-0.595456	Tnfsf4	tumor necrosis factor (ligand) superfamily, member 4
ENSMUSG00000019737	-0.177567	-0.0341238	-0.592695	Syne4	spectrin repeat containing, nuclear envelope family member 4
ENSMUSG00000020877	-0.106993	-0.0760688	-0.591926	Scrn2	secernin 2
ENSMUSG00000086354	0.147393	-0.188221	-0.591872	Gm13938	predicted gene 13938
ENSMUSG00000041343	-0.0848098	0.00984654	-0.59019	Ankrd42	ankyrin repeat domain 42
ENSMUSG00000023966	0.135614	-0.0634964	-0.589507	Rsph9	radial spoke head 9 homolog (Chlamydomonas)
ENSMUSG00000020150	0.0184831	-0.0991915	-0.586577	Gamt	guanidinoacetate methyltransferase
ENSMUSG00000098134	-0.169599	-0.100904	-0.586042	Rnf113a2	ring finger protein 113A2
ENSMUSG00000054128	0.0481578	0.0410394	-0.584093	H2-T3	histocompatibility 2, T region locus 3
ENSMUSG00000036095	-0.0526069	-0.498371	-0.583022	Dgkb	diacylglycerol kinase, beta
ENSMUSG00000064811	0.0830075	0	-0.581378	Gm22358	predicted gene, 22358
ENSMUSG00000017832	0.116992	-0.135614	-0.581378	Hspb9	heat shock protein, alpha-crystallin-related, B9
ENSMUSG00000065581	0	-0.316993	-0.581378	Mir194-1	microRNA 194-1
ENSMUSG00000074121	-0.00358438	-0.0911359	-0.581378	Ntf5	neurotrophin 5
ENSMUSG00000026986	-0.119767	-0.00592129	-0.581246	Hnmt	histamine N-methyltransferase
ENSMUSG00000083898	-0.0117787	-0.0643856	-0.575549	Gm7340	predicted gene 7340
ENSMUSG00000096805	0.0808781	-0.161284	-0.573736	Ighv9-1	immunoglobulin heavy variable 9-1
ENSMUSG00000085335	-0.00302138	-0.0781169	-0.573418	Gm13684	predicted gene 13684
ENSMUSG00000017167	0.0886672	-0.197008	-0.573038	Cntnap1	contactin associated protein-like 1
ENSMUSG00000078452	0.0434335	0.0482016	-0.573014	Raet1d	retinoic acid early transcript delta
ENSMUSG00000037960	0.0344475	0.0853156	-0.569704	Card19	caspase recruitment domain family, member 19
ENSMUSG00000065162	0.0748791	-0.0866578	-0.569599	Gm23645	predicted gene, 23645
ENSMUSG00000090894	0.0526069	-0.2	-0.569599	Or5v1	olfactory receptor family 5 subfamily V member 1
ENSMUSG00000031283	-0.0940176	0.0341482	-0.569292	Chrdl1	chordin-like 1
ENSMUSG00000042436	0.0141607	-0.317089	-0.567037	Mfap4	microfibrillar-associated protein 4
ENSMUSG00000082423	0.0634513	-0.0793714	-0.566702	Gm15148	predicted gene 15148
ENSMUSG00000076475	-0.130338	0.00601129	-0.566557	Trbv19	T cell receptor beta, variable 19
ENSMUSG00000005800	-0.169786	-0.0334549	-0.564203	Mmp8	matrix metallopeptidase 8
ENSMUSG00000059108	0.0595817	0.0761717	-0.562547	Ifitm6	interferon induced transmembrane protein 6
ENSMUSG00000019831	-0.116992	-0.147393	-0.561471	Wasf1	WASP family, member 1
ENSMUSG00000030703	0.0576745	0.0529735	-0.561411	Gdpd3	glycerophosphodiester phosphodiesterase domain containing 3
ENSMUSG00000072898	-0.179281	0.00315144	-0.561261	Gm10434	predicted gene 10434
ENSMUSG00000025432	0.0251062	-0.283076	-0.556177	Avil	advillin
ENSMUSG00000018339	0.00793457	-0.167783	-0.552119	Gpx3	glutathione peroxidase 3
ENSMUSG00000082481	0.0590912	0.0456201	-0.551463	Rps12-ps19	ribosomal protein S12, pseudogene 19
ENSMUSG00000083502	0.0830075	-0.116992	-0.550978	Gm14861	predicted gene 14861
ENSMUSG00000083223	-0.116992	-0.2	-0.550978	Gm15016	predicted gene 15016
ENSMUSG00000046699	-0.116992	0	-0.550978	Slitrk4	SLIT and NTRK-like family, member 4
ENSMUSG00000090459	0.082505	-0.0315471	-0.547643	Gm17210	predicted gene 17210
ENSMUSG00000089336	-0.0830075	-0.283008	-0.547393	Gm24347	predicted gene, 24347
ENSMUSG00000045587	0.2	-0.366015	-0.547393	Lypd10	Ly6/PLAUR domain containing 10
ENSMUSG00000029843	-0.2	-0.0830075	-0.547393	Slc13a4	solute carrier family 13 (sodium/sulfate symporters), member 4
ENSMUSG00000024295	-0.0830075	-0.116992	-0.542849	Cyp4f41-ps	cytochrome P450, family 4, subfamily f, polypeptide 41 pseudogene
ENSMUSG00000048581	-0.074427	-0.103476	-0.541627	E130311K13Rik	RIKEN cDNA E130311K13 gene
ENSMUSG00000022297	0.0892562	-0.0771782	-0.540088	Fzd6	frizzled class receptor 6
ENSMUSG00000082998	-0.144021	-0.0272715	-0.537041	Gm11221	predicted gene 11221
ENSMUSG00000028573	0.0949842	-0.0165048	-0.530909	Fggy	FGGY carbohydrate kinase domain containing
ENSMUSG00000000253	-0.0927852	-0.209343	-0.529605	Gmpr	guanosine monophosphate reductase
ENSMUSG00000070394	0.148118	0.0537873	-0.528863	Tmem256	transmembrane protein 256
ENSMUSG00000047669	-0.100281	-0.205948	-0.526692	Msl3l2	MSL3 like 2
ENSMUSG00000030800	0.0258566	-0.497085	-0.525121	Prss8	protease, serine 8 (prostasin)
ENSMUSG00000097193	-0.122287	-0.161759	-0.519292	No associated gene
ENSMUSG00000014813	-0.0962813	-0.112526	-0.518804	Stc1	stanniocalcin 1
ENSMUSG00000070720	-0.142099	-0.0789649	-0.518634	Tmem200b	transmembrane protein 200B
ENSMUSG00000082668	0	-0.116992	-0.516992	No associated gene
ENSMUSG00000084477	0.116992	0	-0.516992	No associated gene
ENSMUSG00000084544	0.2	0	-0.516992	No associated gene
ENSMUSG00000094224	0	-0.4	-0.516992	No associated gene
ENSMUSG00000098144	-0.2	-0.2	-0.516992	1700029N11Rik	RIKEN cDNA 1700029N11 gene
ENSMUSG00000053181	0.0712288	-0.166015	-0.516992	A830005F24Rik	RIKEN cDNA A830005F24 gene
ENSMUSG00000021751	0.2	0	-0.516992	Acox2	acyl-Coenzyme A oxidase 2, branched chain
ENSMUSG00000045994	0	-0.116992	-0.516992	B3gat1	beta-1,3-glucuronyltransferase 1 (glucuronosyltransferase P)
ENSMUSG00000010841	0.116992	0	-0.516992	Cfap97d1	CFAP97 domain containing 1
ENSMUSG00000028262	-0.2	-0.2	-0.516992	Clca3a2	chloride channel accessory 3A2
ENSMUSG00000079528	-0.2	-0.2	-0.516992	Clnkos	cytokine-dependent hematopoietic cell linker, opposite strand
ENSMUSG00000025488	0	-0.2	-0.516992	Cox8b	cytochrome c oxidase subunit 8B
ENSMUSG00000026870	0.116992	-0.316993	-0.516992	Cutal	cutA divalent cation tolerance homolog-like
ENSMUSG00000074887	-0.2	0	-0.516992	EU599041	expressed sequence EU599041
ENSMUSG00000078554	0	-0.2	-0.516992	Fam229a	family with sequence similarity 229, member A
ENSMUSG00000049721	0.2	-0.2	-0.516992	Gal3st1	galactose-3-O-sulfotransferase 1
ENSMUSG00000086321	0.116992	-0.0304006	-0.516992	Gm11413	predicted gene 11413
ENSMUSG00000082531	0	0	-0.516992	Gm11556	predicted gene 11556
ENSMUSG00000086078	0.116992	-0.369599	-0.516992	Gm11657	predicted gene 11657
ENSMUSG00000081352	-0.2	0	-0.516992	Gm12389	predicted gene 12389
ENSMUSG00000087575	0.2	-0.2	-0.516992	Gm12976	predicted gene 12976
ENSMUSG00000081480	0.033985	0.0830075	-0.516992	Gm13608	predicted gene 13608
ENSMUSG00000086735	0	-0.2	-0.516992	Gm13977	predicted gene 13977
ENSMUSG00000081933	0	0	-0.516992	Gm14767	predicted gene 14767
ENSMUSG00000082778	0	0	-0.516992	Gm15191	predicted gene 15191
ENSMUSG00000082103	0.2	-0.0830075	-0.516992	Gm15320	predicted gene 15320
ENSMUSG00000082287	-0.116992	0	-0.516992	Gm15333	predicted gene 15333
ENSMUSG00000085487	0.2	-0.316993	-0.516992	Gm15654	predicted gene 15654
ENSMUSG00000087689	-0.166015	-0.0526069	-0.516992	Gm15845	predicted gene 15845
ENSMUSG00000081550	0	0.0304006	-0.516992	Gm15877	predicted gene 15877
ENSMUSG00000089712	0.116992	0	-0.516992	Gm15889	predicted gene 15889
ENSMUSG00000090232	0	-0.2	-0.516992	Gm16132	predicted gene 16132
ENSMUSG00000091289	0.2	0	-0.516992	Gm17051	predicted gene 17051
ENSMUSG00000077360	-0.116992	0	-0.516992	Gm23482	predicted gene, 23482
ENSMUSG00000077250	0.116992	0	-0.516992	Gm26075	predicted gene, 26075
ENSMUSG00000097513	-0.2	0	-0.516992	Gm26696	predicted gene, 26696
ENSMUSG00000066620	-0.0830075	-0.283008	-0.516992	Gm4883	predicted gene 4883
ENSMUSG00000060981	-0.0643856	-0.359172	-0.516992	H4c8	H4 clustered histone 8
ENSMUSG00000026971	0	0	-0.516992	Itgb6	integrin beta 6
ENSMUSG00000040901	0	-0.2	-0.516992	Kcnk18	potassium channel, subfamily K, member 18
ENSMUSG00000086504	0	-0.116992	-0.516992	Kif16bos	kinesin family member 16B, opposite strand
ENSMUSG00000045083	0	-0.2	-0.516992	Lingo2	leucine rich repeat and Ig domain containing 2
ENSMUSG00000085170	-0.0830075	-0.2	-0.516992	Lrrc75aos1	leucine rich repeat containing 75A, opposite strand 1
ENSMUSG00000055125	-0.0830075	0	-0.516992	M5C1000I18Rik	RIKEN cDNA M5C1000I18 gene
ENSMUSG00000070552	0	0	-0.516992	Mrgprx1	MAS-related GPR, member X1
ENSMUSG00000053613	-0.116992	-0.2	-0.516992	Notumos	notum palmitoleoyl-protein carboxylesterase, opposite strand
ENSMUSG00000043659	0	-0.2	-0.516992	Npsr1	neuropeptide S receptor 1
ENSMUSG00000064906	0.0830075	0	-0.516992	n-R5s204	nuclear encoded rRNA 5S 204
ENSMUSG00000043013	0	-0.2	-0.516992	Onecut1	one cut domain, family member 1
ENSMUSG00000090631	-0.2	-0.2	-0.516992	Or2r2	olfactory receptor family 2 subfamily R member 2
ENSMUSG00000043458	-0.0304006	0.0186219	-0.516992	Pcdhb12	protocadherin beta 12
ENSMUSG00000025916	-0.116992	-0.0186219	-0.516992	Ppp1r42	protein phosphatase 1, regulatory subunit 42
ENSMUSG00000070778	-0.116992	-0.116992	-0.516992	Rpl7a-ps8	ribosomal protein L7A, pseudogene 8
ENSMUSG00000048385	0	0	-0.516992	Scrt1	scratch family zinc finger 1
ENSMUSG00000040046	0	0	-0.516992	Tph1	tryptophan hydroxylase 1
ENSMUSG00000028963	0	-0.4	-0.516992	Uts2	urotensin 2
ENSMUSG00000042707	-0.00229913	0.0205622	-0.514693	Dnali1	dynein, axonemal, light intermediate polypeptide 1
ENSMUSG00000076563	-0.0447882	0.00889674	-0.514184	Igkv5-48	immunoglobulin kappa variable 5-48
ENSMUSG00000097416	0.00730517	-0.490242	-0.514159	Gm26670	predicted gene, 26670
ENSMUSG00000036587	-0.0947203	0.0101336	-0.513408	Fut7	fucosyltransferase 7
ENSMUSG00000022610	-0.236503	-0.0920055	-0.511317	Mapk12	mitogen-activated protein kinase 12
ENSMUSG00000040283	-0.18799	0.00774701	-0.509979	Btnl9	butyrophilin-like 9
ENSMUSG00000091313	-0.0193723	0.0526069	-0.508864	Fth-ps2	ferritin heavy chain, pseudogene 2
ENSMUSG00000042498	0.0526069	-0.0251062	-0.508402	Radx	RPA1 related single stranded DNA binding protein, X-linked
ENSMUSG00000034463	-0.0643667	0.0518816	-0.508333	Scara3	scavenger receptor class A, member 3
ENSMUSG00000032085	-0.0172184	0.0562921	-0.504583	Tagln	transgelin
ENSMUSG00000056174	0.0980782	-0.337567	-0.503396	Col8a2	collagen, type VIII, alpha 2
ENSMUSG00000026162	0.0742241	-0.238804	-0.503168	Nhej1	non-homologous end joining factor 1
ENSMUSG00000073787	-0.231224	-0.0918863	-0.501654	Gm10575	predicted gene 10575
ENSMUSG00000029864	-0.0978757	0.0346898	-0.500648	Gstk1	glutathione S-transferase kappa 1
ENSMUSG00000031994	-0.0783413	0.0423054	-0.498371	Adamts8	a disintegrin-like and metallopeptidase (reprolysin type) with thrombospondin type 1 motif, 8
ENSMUSG00000086820	-0.0643856	-0.350977	-0.498371	Gm11465	predicted gene 11465
ENSMUSG00000086235	0.147393	-0.13107	-0.494786	Gm16284	predicted gene 16284
ENSMUSG00000029675	0.227993	-0.15622	-0.492158	Eln	elastin
ENSMUSG00000082357	0.2	-0.2	-0.491886	Gm13542	predicted gene 13542
ENSMUSG00000046961	0.102521	-0.183677	-0.491292	Gpr156	G protein-coupled receptor 156
ENSMUSG00000082127	-0.0540591	-0.180173	-0.49016	Gm13577	predicted gene 13577
ENSMUSG00000055831	-0.00239453	-0.327486	-0.48978	Gm9982	predicted gene 9982
ENSMUSG00000037216	0.101504	0.119441	-0.488929	Lipt1	lipoyltransferase 1
ENSMUSG00000029720	-0.21261	-0.0147199	-0.484305	Gm20605	predicted gene 20605
ENSMUSG00000038917	0.233985	-0.316993	-0.483007	3930402G23Rik	RIKEN cDNA 3930402G23 gene
ENSMUSG00000021214	0	-0.2	-0.483007	Akr1c18	aldo-keto reductase family 1, member C18
ENSMUSG00000079415	-0.0304006	-0.483007	-0.483007	Cntf	ciliary neurotrophic factor
ENSMUSG00000083339	-0.033985	-0.033985	-0.483007	Gm11693	predicted gene 11693
ENSMUSG00000065304	-0.0444785	-0.169599	-0.483007	Gm23245	predicted gene, 23245
ENSMUSG00000053334	-0.0464303	0.0673908	-0.482658	Ficd	FIC domain containing
ENSMUSG00000086107	-0.115687	-0.0455391	-0.481512	Gm16312	predicted gene 16312
ENSMUSG00000020282	0.00479399	0.0495002	-0.480675	Rhbdf1	rhomboid 5 homolog 1
ENSMUSG00000028017	-0.216239	-0.139294	-0.480164	Egf	epidermal growth factor
ENSMUSG00000041707	-0.0819501	0.0169582	-0.479197	Tmem273	transmembrane protein 273
ENSMUSG00000045876	0.0712288	-0.0830075	-0.478463	Pcdhb8	protocadherin beta 8
ENSMUSG00000044595	-0.0297457	-0.123371	-0.47801	Dnd1	DND microRNA-mediated repression inhibitor 1
ENSMUSG00000051537	0.169599	-0.191872	-0.477178	Gm5124	predicted pseudogene 5124
ENSMUSG00000002393	-0.0635293	0.0504633	-0.476507	Nr2f6	nuclear receptor subfamily 2, group F, member 6
ENSMUSG00000094930	0.0909173	-0.120115	-0.473894	Igkv6-25	immunoglobulin kappa chain variable 6-25
ENSMUSG00000086076	-0.00292935	-0.135614	-0.471229	Ncr3-ps	natural cytotoxicity triggering receptor 3, pseudogene
ENSMUSG00000091492	0.0081284	0.0631004	-0.470335	Gm17025	predicted gene 17025
ENSMUSG00000025436	-0.107248	0.0338966	-0.469018	Atp23	ATP23 metallopeptidase and ATP synthase assembly factor homolog
ENSMUSG00000019301	0.236885	-0.0842928	-0.467315	Hsd17b1	hydroxysteroid (17-beta) dehydrogenase 1
ENSMUSG00000050132	-0.0520721	-0.378478	-0.466685	Sarm1	sterile alpha and HEAT/Armadillo motif containing 1
ENSMUSG00000053687	0.0529677	0.0957836	-0.46562	Dpep2	dipeptidase 2
ENSMUSG00000038903	0.252607	-0.135614	-0.465493	Ccdc68	coiled-coil domain containing 68
ENSMUSG00000096631	-0.0830075	-0.516992	-0.464386	No associated gene
ENSMUSG00000097672	0.116992	-0.316993	-0.464386	No associated gene
ENSMUSG00000054901	0.264386	-0.283008	-0.464386	Arhgef33	Rho guanine nucleotide exchange factor (GEF) 33
ENSMUSG00000029685	0	-0.0830075	-0.464386	Asb15	ankyrin repeat and SOCS box-containing 15
ENSMUSG00000058626	0.2	-0.116992	-0.464386	Capn11	calpain 11
ENSMUSG00000091110	0	0	-0.464386	Gm2832	predicted gene 2832
ENSMUSG00000091510	0.2	0	-0.464386	Mtag2	metastasis associated gene 2
ENSMUSG00000067144	-0.2	-0.283008	-0.464386	Slc22a7	solute carrier family 22 (organic anion transporter), member 7
ENSMUSG00000076750	-0.147393	-0.233985	-0.464386	Trgv3	T cell receptor gamma, variable 3
ENSMUSG00000079173	-0.039792	0.0760519	-0.46377	Zan	zonadhesin
ENSMUSG00000023266	-0.0957081	-0.175429	-0.463592	Frs3	fibroblast growth factor receptor substrate 3
ENSMUSG00000093176	0.0304006	-0.0304006	-0.4631	Mir5119	microRNA 5119
ENSMUSG00000036545	-0.0115309	-0.0438924	-0.461472	Adamts2	a disintegrin-like and metallopeptidase (reprolysin type) with thrombospondin type 1 motif, 2
ENSMUSG00000097760	-0.130406	-0.135765	-0.460242	6030442K20Rik	RIKEN cDNA 6030442K20 gene
ENSMUSG00000024529	-0.253974	-0.103751	-0.459323	Lox	lysyl oxidase
ENSMUSG00000092412	0.017995	-0.365026	-0.458695	Gm20507	predicted gene 20507
ENSMUSG00000098108	0.349692	-0.339265	-0.458556	Gm27008	predicted gene, 27008
ENSMUSG00000034205	-0.110498	-0.12032	-0.457735	Loxl2	lysyl oxidase-like 2
ENSMUSG00000091020	-0.188221	-0.198691	-0.455785	Gm5828	predicted gene 5828
ENSMUSG00000034685	-0.0325888	-0.00519904	-0.455507	Fam171a2	family with sequence similarity 171, member A2
ENSMUSG00000034485	-0.121923	-0.0402408	-0.455324	Uaca	uveal autoantigen with coiled-coil domains and ankyrin repeats
ENSMUSG00000094006	-0.00181418	0.0684306	-0.455313	Igkv4-59	immunoglobulin kappa variable 4-59
ENSMUSG00000080896	-0.193817	0.00446843	-0.455153	Gm14567	predicted gene 14567
ENSMUSG00000002769	-0.11943	-0.286592	-0.454545	Gnmt	glycine N-methyltransferase
ENSMUSG00000095234	0	-0.298371	-0.453892	Gm21586	predicted gene, 21586
ENSMUSG00000006611	-0.174915	0.0340358	-0.45345	Hfe	homeostatic iron regulator
ENSMUSG00000049489	0.0662794	0.0333172	-0.453071	Ccnq	cyclin Q
ENSMUSG00000092819	-0.181378	-0.316993	-0.452607	Gm23639	predicted gene, 23639
ENSMUSG00000097239	0.181378	0.113408	-0.452607	Gm27029	predicted gene, 27029
ENSMUSG00000029636	-0.163983	0.0210646	-0.452549	Wasf3	WASP family, member 3
ENSMUSG00000020310	-0.0171721	-0.127051	-0.451069	Madcam1	mucosal vascular addressin cell adhesion molecule 1
ENSMUSG00000033703	-0.0717983	0.0453117	-0.450764	Fcsk	fucose kinase
ENSMUSG00000064514	-0.136802	-0.308864	-0.449846	Gm22455	predicted gene, 22455
ENSMUSG00000097768	0.0984759	-0.149463	-0.449674	2310043M15Rik	RIKEN cDNA 2310043M15 gene
ENSMUSG00000031808	-0.223013	-0.152241	-0.449336	Slc27a1	solute carrier family 27 (fatty acid transporter), member 1
ENSMUSG00000028643	0.0829026	-0.0170676	-0.448876	Svbp	small vasohibin binding protein
ENSMUSG00000092341	-0.265158	-0.0127729	-0.448675	Malat1	metastasis associated lung adenocarcinoma transcript 1 (non-coding RNA)
ENSMUSG00000020773	-0.0268177	-0.0769816	-0.448663	Trim47	tripartite motif-containing 47
ENSMUSG00000052426	-0.257005	-0.0303895	-0.448619	Gm9877	predicted gene 9877
ENSMUSG00000090329	-0.0107586	-0.186211	-0.448202	Gm17160	predicted gene 17160
ENSMUSG00000075272	-0.112448	-0.454713	-0.447408	Ift70a2	intraflagellar transport 70A2
ENSMUSG00000061510	0.0766885	0.118524	-0.447265	Gm10101	predicted gene 10101
ENSMUSG00000084899	-0.133943	-0.237439	-0.447161	Gm15344	predicted gene 15344
ENSMUSG00000084866	0.227875	-0.199367	-0.447012	A930006K02Rik	RIKEN cDNA A930006K02 gene
ENSMUSG00000026574	-0.273325	-0.0343533	-0.446223	Dpt	dermatopontin
ENSMUSG00000087612	-0.127009	0.0471615	-0.445855	A230005M16Rik	RIKEN cDNA A230005M16 gene
ENSMUSG00000079462	0.033985	-0.45938	-0.445109	Gm15737	predicted gene 15737
ENSMUSG00000051727	-0.0726146	0.0502602	-0.44467	Kctd14	potassium channel tetramerisation domain containing 14
ENSMUSG00000029436	0.106487	0.13308	-0.444478	Mmp17	matrix metallopeptidase 17
ENSMUSG00000068079	0.233985	-0.116992	-0.444478	Tcf15	transcription factor 15
ENSMUSG00000094468	-0.162006	-0.106499	-0.444478	Trav6-4	T cell receptor alpha variable 6-4
ENSMUSG00000033055	-0.0396059	0.00645769	-0.443581	Ankrd54	ankyrin repeat domain 54
ENSMUSG00000026556	-0.23341	-0.142094	-0.443365	Vangl2	VANGL planar cell polarity 2
ENSMUSG00000055305	-0.264386	-0.043636	-0.441944	Zfp93	zinc finger protein 93
ENSMUSG00000050788	-0.00730517	-0.442864	-0.441717	Or10z1	olfactory receptor family 10 subfamily Z member 1
ENSMUSG00000039519	-0.0923616	-0.295684	-0.44129	Cyp7b1	cytochrome P450, family 7, subfamily b, polypeptide 1
ENSMUSG00000078552	-0.136928	0.0490434	-0.441109	Dcdc2b	doublecortin domain containing 2b
ENSMUSG00000039199	-0.264236	-0.0794887	-0.440266	Zdhhc1	zinc finger, DHHC domain containing 1
ENSMUSG00000097262	-0.151999	-0.0901002	-0.44	4933416M07Rik	RIKEN cDNA 4933416M07 gene
ENSMUSG00000052525	0.316463	-0.218065	-0.437875	Spdya	speedy/RINGO cell cycle regulator family, member A
ENSMUSG00000097471	0.128661	-0.0157721	-0.437625	5830432E09Rik	RIKEN cDNA 5830432E09 gene
ENSMUSG00000095159	0.212453	0.118345	-0.436405	Tubb4b-ps1	tubulin, beta 4B class IVB, pseudogene 1
ENSMUSG00000026278	0.0157387	-0.155186	-0.435963	Bok	BCL2-related ovarian killer
ENSMUSG00000096956	-0.238758	-0.0842936	-0.434875	Snhg18	small nucleolar RNA host gene 18
ENSMUSG00000077967	0.116992	0	-0.433985	No associated gene
ENSMUSG00000099088	0	-0.316993	-0.433985	No associated gene
ENSMUSG00000021381	-0.0830075	-0.0830075	-0.433985	Barx1	BarH-like homeobox 1
ENSMUSG00000008136	0.00270296	-0.0100663	-0.433985	Fhl2	four and a half LIM domains 2
ENSMUSG00000084068	-0.0830075	0	-0.433985	Gm11573	predicted gene 11573
ENSMUSG00000084146	0.116992	0.0830075	-0.433985	Gm12104	predicted gene 12104
ENSMUSG00000080703	0	-0.116992	-0.433985	Gm13183	predicted gene 13183
ENSMUSG00000083429	-0.233985	-0.283008	-0.433985	Gm15198	predicted gene 15198
ENSMUSG00000091775	0.2	-0.316993	-0.433985	Gm16494	predicted gene 16494
ENSMUSG00000089571	0.2	0.116992	-0.433985	Gm23008	predicted gene, 23008
ENSMUSG00000004371	0	-0.316993	-0.433985	Il11	interleukin 11
ENSMUSG00000098516	0.113408	-0.328771	-0.433985	Mir7651	microRNA 7651
ENSMUSG00000044287	-0.0526069	-0.433985	-0.433985	Nrn1l	neuritin 1-like
ENSMUSG00000059503	-0.116992	0	-0.433985	Or10x4	olfactory receptor family 10 subfamily X member 4
ENSMUSG00000057457	0.0830075	-0.316993	-0.433985	Phex	phosphate regulating endopeptidase homolog, X-linked
ENSMUSG00000026774	-0.0830075	-0.2	-0.433985	Potegl	POTE ankyrin domain family, member G like
ENSMUSG00000049353	-0.283008	-0.181378	-0.433985	Rd3	retinal degeneration 3
ENSMUSG00000000792	0.17325	0.121537	-0.433162	Slc5a5	solute carrier family 5 (sodium iodide symporter), member 5
ENSMUSG00000092564	-0.0224137	0.0320929	-0.432411	BC051226	cDNA sequence BC051226
ENSMUSG00000033768	-0.134376	-0.384615	-0.432066	Nrxn2	neurexin II
ENSMUSG00000087385	-0.147393	-0.222427	-0.431899	Frg2f1	FSHD region gene 2 family member 1
ENSMUSG00000097559	-0.277902	-0.0156005	-0.431009	D430018E03Rik	RIKEN cDNA D430018E03 gene
ENSMUSG00000049872	-0.28258	-0.150977	-0.431007	Calhm5	calcium homeostasis modulator family member 5
ENSMUSG00000078441	0.347393	-0.181378	-0.430401	No associated gene
ENSMUSG00000030030	-0.191872	-0.169599	-0.430401	1700003E16Rik	RIKEN cDNA 1700003E16 gene
ENSMUSG00000064294	0.264386	-0.181378	-0.430401	Aox3	aldehyde oxidase 3
ENSMUSG00000095474	0.244478	0.0186219	-0.430401	Cldn34c2	claudin 34C2
ENSMUSG00000091558	-0.156177	0.0081284	-0.430401	Gm17227	predicted gene 17227
ENSMUSG00000065259	-0.072514	0	-0.430401	Snora30	small nucleolar RNA, H/ACA box 30
ENSMUSG00000027932	0.0756201	-0.338889	-0.429631	Slc27a3	solute carrier family 27 (fatty acid transporter), member 3
ENSMUSG00000095940	0.0130251	-0.0766824	-0.429574	Gm16416	predicted gene 16416
ENSMUSG00000019539	-0.0434273	-0.0578509	-0.4292	Rcn3	reticulocalbin 3, EF-hand calcium binding domain
ENSMUSG00000037852	-0.207662	0.0260922	-0.429163	Cpe	carboxypeptidase E
ENSMUSG00000024871	-0.0321642	-0.135082	-0.429022	Doc2g	double C2, gamma
ENSMUSG00000093803	0.0302132	0.000963403	-0.42843	Ppp2r3d	protein phosphatase 2 (formerly 2A), regulatory subunit B'', delta
ENSMUSG00000003934	0.0288293	0.0794231	-0.424808	Efnb3	ephrin B3
ENSMUSG00000074575	-0.0479793	-0.014162	-0.42475	Kcng1	potassium voltage-gated channel, subfamily G, member 1
ENSMUSG00000048899	-0.227501	-0.316993	-0.424451	Rimkla	ribosomal modification protein rimK-like family member A
ENSMUSG00000037225	-0.0365564	-0.0317332	-0.422884	Fgf2	fibroblast growth factor 2
ENSMUSG00000098188	-0.166015	0.0081284	-0.422206	Sowahc	sosondowah ankyrin repeat domain family member C
ENSMUSG00000022422	0.0332524	0.0566562	-0.422126	Dscc1	DNA replication and sister chromatid cohesion 1
ENSMUSG00000093906	0.134821	0.0664973	-0.420658	Igkv9-129	immunoglobulin kappa variable 9-129
ENSMUSG00000019467	-0.249773	-0.0650294	-0.418841	Arhgef25	Rho guanine nucleotide exchange factor (GEF) 25
ENSMUSG00000042870	-0.126423	-0.079655	-0.418148	Tom1	target of myb1 trafficking protein
ENSMUSG00000060639	-0.072464	-0.0186885	-0.417882	H4c9	H4 clustered histone 9
ENSMUSG00000063727	0.10025	0.0526069	-0.417542	Tnfrsf11b	tumor necrosis factor receptor superfamily, member 11b (osteoprotegerin)
ENSMUSG00000030109	-0.140901	-0.260793	-0.417493	Slc6a12	solute carrier family 6 (neurotransmitter transporter, betaine/GABA), member 12
ENSMUSG00000050493	0.00495891	0.0307456	-0.416969	Fam167b	family with sequence similarity 167, member B
ENSMUSG00000046727	0.157887	-0.0523086	-0.41579	Cystm1	cysteine-rich transmembrane module containing 1
ENSMUSG00000069171	-0.0736217	-0.156149	-0.415706	Nr2f1	nuclear receptor subfamily 2, group F, member 1
ENSMUSG00000063430	0.0522984	0.0186219	-0.414967	Wscd2	WSC domain containing 2
ENSMUSG00000068184	-0.0382072	-0.0206479	-0.414893	Ndufaf2	NADH:ubiquinone oxidoreductase complex assembly factor 2
ENSMUSG00000097061	-0.0851574	-0.0520197	-0.414595	9330151L19Rik	RIKEN cDNA 9330151L19 gene
ENSMUSG00000082325	0.2	-0.393157	-0.414078	Gm12642	predicted gene 12642
ENSMUSG00000020163	0.0802696	0.103211	-0.412844	Uqcr11	ubiquinol-cytochrome c reductase, complex III subunit XI
ENSMUSG00000058873	-0.211683	-0.244291	-0.412721	Gm5582	predicted gene 5582
ENSMUSG00000021567	-0.121081	0.0104935	-0.411979	Nkd2	naked cuticle 2
ENSMUSG00000038349	-0.0236544	0.0476737	-0.411975	Plcl1	phospholipase C-like 1
ENSMUSG00000033427	0.177131	-0.264806	-0.411927	Upb1	ureidopropionase, beta
ENSMUSG00000087629	0.17325	-0.23635	-0.411779	Gm12246	predicted gene 12246
ENSMUSG00000083674	-0.233985	0.0081284	-0.411779	Zfp133-ps	zinc finger protein 133, pseudogene
ENSMUSG00000092417	0.228756	0.160981	-0.411261	Gpank1	G patch domain and ankyrin repeats 1
ENSMUSG00000075706	-0.132721	-0.0979265	-0.411074	Gpx4	glutathione peroxidase 4
ENSMUSG00000096577	0.0367594	0.0486871	-0.410862	Ighv1-71	immunoglobulin heavy variable 1-71
ENSMUSG00000076757	0.2351	0.0804603	-0.410591	Trgc4	T cell receptor gamma, constant 4
ENSMUSG00000079465	-0.181378	-0.381378	-0.410493	Col4a3	collagen, type IV, alpha 3
ENSMUSG00000047085	-0.147393	-0.116992	-0.410493	Lrrc4b	leucine rich repeat containing 4B
ENSMUSG00000019326	-0.242406	-0.344012	-0.408128	Aoc3	amine oxidase, copper containing 3
ENSMUSG00000017718	-0.0695458	0.0158709	-0.407088	Afmid	arylformamidase
ENSMUSG00000000731	0.259924	0.0757765	-0.40647	Aire	autoimmune regulator (autoimmune polyendocrinopathy candidiasis ectodermal dystrophy)
ENSMUSG00000001946	-0.054294	-0.0626792	-0.404911	Esam	endothelial cell-specific adhesion molecule
ENSMUSG00000097616	0.130651	-0.210663	-0.40475	1110019D14Rik	RIKEN cDNA 1110019D14 gene
ENSMUSG00000053046	0.00684314	-0.286592	-0.403584	Brsk2	BR serine/threonine kinase 2
ENSMUSG00000076761	-0.204544	0.0275007	-0.403584	Trav5-1	T cell receptor alpha variable 5-1
ENSMUSG00000097281	-0.115707	-0.391872	-0.402299	Gm26685	predicted gene, 26685
ENSMUSG00000077614	-0.297085	-0.0911359	-0.401285	No associated gene
ENSMUSG00000094526	0.288268	-0.307589	-0.401272	Gm21451	predicted gene, 21451
ENSMUSG00000022177	0.185167	0.168902	-0.400879	Haus4	HAUS augmin-like complex, subunit 4
ENSMUSG00000038515	0.157887	-0.0760694	-0.400501	Grtp1	GH regulated TBC protein 1
ENSMUSG00000064491	0.316993	0	-0.4	No associated gene
ENSMUSG00000084156	0	0	-0.4	No associated gene
ENSMUSG00000084520	0	0	-0.4	No associated gene
ENSMUSG00000084545	-0.116992	0	-0.4	No associated gene
ENSMUSG00000087730	-0.033985	0	-0.4	No associated gene
ENSMUSG00000087854	-0.116992	-0.283008	-0.4	No associated gene
ENSMUSG00000088742	0	0	-0.4	No associated gene
ENSMUSG00000089256	0.2	0	-0.4	No associated gene
ENSMUSG00000092835	-0.2	-0.2	-0.4	No associated gene
ENSMUSG00000093207	0.2	0	-0.4	No associated gene
ENSMUSG00000094620	-0.2	-0.2	-0.4	No associated gene
ENSMUSG00000095097	-0.2	0	-0.4	No associated gene
ENSMUSG00000095728	0	-0.2	-0.4	No associated gene
ENSMUSG00000095740	0.2	0	-0.4	No associated gene
ENSMUSG00000096126	-0.2	-0.2	-0.4	No associated gene
ENSMUSG00000096174	-0.2	0	-0.4	No associated gene
ENSMUSG00000099074	-0.2	0	-0.4	No associated gene
ENSMUSG00000099114	0	0	-0.4	No associated gene
ENSMUSG00000069890	0	0	-0.4	1700024J04Rik	RIKEN cDNA 1700024J04 gene
ENSMUSG00000013083	0.2	0	-0.4	2200002J24Rik	RIKEN cDNA 2200002J24 gene
ENSMUSG00000041789	0	-0.316993	-0.4	2700046A07Rik	RIKEN cDNA 2700046A07 gene
ENSMUSG00000026734	0	0	-0.4	4921504E06Rik	RIKEN cDNA 4921504E06 gene
ENSMUSG00000020434	0.2	-0.0830075	-0.4	4921536K21Rik	RIKEN cDNA 4921536K21 gene
ENSMUSG00000021098	-0.116992	-0.316993	-0.4	4930447C04Rik	RIKEN cDNA 4930447C04 gene
ENSMUSG00000087137	0	0	-0.4	4930509K18Rik	RIKEN cDNA 4930509K18 gene
ENSMUSG00000032048	0	0	-0.4	4930510E17Rik	RIKEN cDNA 4930510E17 gene
ENSMUSG00000045318	-0.2	-0.2	-0.4	Adra2c	adrenergic receptor, alpha 2c
ENSMUSG00000073568	0.2	0	-0.4	Arl14epl	ADP-ribosylation factor-like 14 effector protein-like
ENSMUSG00000036816	0	0	-0.4	Atoh7	atonal bHLH transcription factor 7
ENSMUSG00000045942	0	-0.316993	-0.4	BC049762	cDNA sequence BC049762
ENSMUSG00000074489	-0.0538921	-0.218622	-0.4	Bglap3	bone gamma-carboxyglutamate protein 3
ENSMUSG00000005649	0	-0.2	-0.4	Cabp5	calcium binding protein 5
ENSMUSG00000030898	0.2	0	-0.4	Cckbr	cholecystokinin B receptor
ENSMUSG00000090176	0.316993	0	-0.4	Cd200r2	Cd200 receptor 2
ENSMUSG00000019489	-0.147393	0	-0.4	Cd70	CD70 antigen
ENSMUSG00000031725	-0.2	-0.2	-0.4	Ces1f	carboxylesterase 1F
ENSMUSG00000026514	0.116992	0	-0.4	Cnih3	cornichon family AMPA receptor auxiliary protein 3
ENSMUSG00000027938	-0.285307	-0.26797	-0.4	Creb3l4	cAMP responsive element binding protein 3-like 4
ENSMUSG00000062329	0.2	-0.116992	-0.4	Cytl1	cytokine-like 1
ENSMUSG00000074678	0.2	-0.4	-0.4	Defb25	defensin beta 25
ENSMUSG00000079000	0.116992	0.0830075	-0.4	Dnmt3bos	DNA methyltransferase 3B, opposite strand
ENSMUSG00000087648	0	-0.316993	-0.4	E130018N17Rik	RIKEN cDNA E130018N17 gene
ENSMUSG00000075510	0	0	-0.4	Fam187a	family with sequence similarity 187, member A
ENSMUSG00000046826	0.116992	0.116992	-0.4	Fam187b	family with sequence similarity 187, member B
ENSMUSG00000047797	0	-0.244478	-0.4	Gjb1	gap junction protein, beta 1
ENSMUSG00000058736	0	0	-0.4	Gm10047	predicted gene 10047
ENSMUSG00000079644	0	-0.4	-0.4	Gm1110	predicted gene 1110
ENSMUSG00000081924	0.2	0.0830075	-0.4	Gm11191	predicted gene 11191
ENSMUSG00000084120	0	0	-0.4	Gm11624	predicted gene 11624
ENSMUSG00000084201	0.2	0	-0.4	Gm11926	predicted gene 11926
ENSMUSG00000082816	-0.2	-0.2	-0.4	Gm11953	predicted gene 11953
ENSMUSG00000084048	0.2	0	-0.4	Gm12042	predicted gene 12042
ENSMUSG00000086707	0	-0.116992	-0.4	Gm12088	predicted gene 12088
ENSMUSG00000082415	0	0	-0.4	Gm12486	predicted gene 12486
ENSMUSG00000081578	0.2	0	-0.4	Gm12611	predicted gene 12611
ENSMUSG00000083016	0.2	0.116992	-0.4	Gm12618	predicted gene 12618
ENSMUSG00000081110	0	0	-0.4	Gm12745	predicted gene 12745
ENSMUSG00000082686	-0.169599	0	-0.4	Gm12961	predicted gene 12961
ENSMUSG00000087451	0.316993	-0.0830075	-0.4	Gm12970	predicted gene 12970
ENSMUSG00000085002	0	-0.4	-0.4	Gm12984	predicted gene 12984
ENSMUSG00000081672	0.2	-0.116992	-0.4	Gm13000	predicted gene 13000
ENSMUSG00000082246	0	-0.2	-0.4	Gm13047	predicted gene 13047
ENSMUSG00000081772	-0.2	-0.116992	-0.4	Gm13131	predicted gene 13131
ENSMUSG00000080820	-0.2	0	-0.4	Gm13197	predicted gene 13197
ENSMUSG00000081005	-0.116992	0	-0.4	Gm13198	predicted gene 13198
ENSMUSG00000079604	-0.116992	-0.4	-0.4	Gm13219	predicted gene 13219
ENSMUSG00000070908	-0.0830075	0	-0.4	Gm13288	predicted gene 13288
ENSMUSG00000086882	0.2	0	-0.4	Gm13352	predicted gene 13352
ENSMUSG00000083777	0	0	-0.4	Gm13361	predicted gene 13361
ENSMUSG00000081719	0	0	-0.4	Gm13726	predicted gene 13726
ENSMUSG00000082108	0	0	-0.4	Gm13777	predicted gene 13777
ENSMUSG00000086630	0.2	-0.2	-0.4	Gm14397	predicted gene 14397
ENSMUSG00000082765	0	0	-0.4	Gm14411	predicted gene 14411
ENSMUSG00000083837	-0.2	0	-0.4	Gm14427	predicted gene 14427
ENSMUSG00000083608	0.116992	-0.116992	-0.4	Gm14863	predicted gene 14863
ENSMUSG00000082837	0.116992	0	-0.4	Gm15373	predicted gene 15373
ENSMUSG00000083620	0.2	0	-0.4	Gm15529	predicted gene 15529
ENSMUSG00000086863	0	-0.316993	-0.4	Gm15543	predicted gene 15543
ENSMUSG00000083536	0.4	-0.233985	-0.4	Gm15808	predicted gene 15808
ENSMUSG00000087167	0	0	-0.4	Gm15891	predicted gene 15891
ENSMUSG00000086065	0	0	-0.4	Gm16180	predicted gene 16180
ENSMUSG00000059571	0.2	0	-0.4	Gm16218	predicted gene 16218
ENSMUSG00000083994	-0.0830075	-0.483007	-0.4	Gm16465	predicted gene 16465
ENSMUSG00000082315	0	-0.116992	-0.4	Gm16523	predicted gene, 16523
ENSMUSG00000066477	-0.2	-0.2	-0.4	Gm16551	predicted gene 16551
ENSMUSG00000091594	-0.2	-0.4	-0.4	Gm17067	predicted gene 17067
ENSMUSG00000091096	-0.2	-0.2	-0.4	Gm17304	predicted gene, 17304
ENSMUSG00000091034	0	0	-0.4	Gm17660	predicted gene, 17660
ENSMUSG00000092510	0	-0.2	-0.4	Gm18343	predicted gene, 18343
ENSMUSG00000092389	-0.116992	-0.2	-0.4	Gm20483	predicted gene 20483
ENSMUSG00000093673	-0.116992	-0.4	-0.4	Gm20644	predicted gene 20644
ENSMUSG00000098760	0.2	0	-0.4	Gm2164	predicted gene 2164
ENSMUSG00000077271	-0.166015	-0.181378	-0.4	Gm22781	predicted gene, 22781
ENSMUSG00000077254	0.2	0	-0.4	Gm26079	predicted gene, 26079
ENSMUSG00000097283	-0.233985	0	-0.4	Gm26686	predicted gene, 26686
ENSMUSG00000097363	0	-0.2	-0.4	Gm26717	predicted gene, 26717
ENSMUSG00000082068	-0.2	0	-0.4	Gm2673	predicted gene 2673
ENSMUSG00000093892	-0.316993	-0.116992	-0.4	Gm3261	predicted gene 3261
ENSMUSG00000080798	0.2	0	-0.4	Gm5135	predicted pseudogene 5135
ENSMUSG00000097996	0.2	0	-0.4	Gm5313	predicted gene 5313
ENSMUSG00000090765	0.2	0	-0.4	Gm54637	predicted gene, 54637
ENSMUSG00000074501	0	-0.2	-0.4	Gm5612	predicted gene 5612
ENSMUSG00000082960	0	0	-0.4	Gm6884	predicted gene 6884
ENSMUSG00000092447	0.0830075	-0.316993	-0.4	Gm7696	predicted gene 7696
ENSMUSG00000082204	-0.2	-0.4	-0.4	Gm7722	predicted gene 7722
ENSMUSG00000098115	0	0	-0.4	Gm8816	predicted gene 8816
ENSMUSG00000022286	-0.2	0	-0.4	Grhl2	grainyhead like transcription factor 2
ENSMUSG00000068762	0	-0.316993	-0.4	Gstm6	glutathione S-transferase, mu 6
ENSMUSG00000099056	0.316993	0	-0.4	Gtpbp4-ps3	GTP binding protein 4, pseudogene 3
ENSMUSG00000032338	0.2	0.116992	-0.4	Hcn4	hyperpolarization-activated, cyclic nucleotide-gated K+ 4
ENSMUSG00000022485	-0.2	-0.2	-0.4	Hoxc5	homeobox C5
ENSMUSG00000062410	0	-0.2	-0.4	Hsd3b3	hydroxy-delta-5-steroid dehydrogenase, 3 beta- and steroid delta-isomerase 3
ENSMUSG00000000794	-0.2	-0.2	-0.4	Kcnn3	potassium intermediate/small conductance calcium-activated channel, subfamily N, member 3
ENSMUSG00000098832	0	-0.4	-0.4	Kdm4dl	lysine (K)-specific demethylase 4D-like
ENSMUSG00000073209	0.2	0	-0.4	Klf14	Kruppel-like transcription factor 14
ENSMUSG00000030713	0	-0.4	-0.4	Klk7	kallikrein related-peptidase 7 (chymotryptic, stratum corneum)
ENSMUSG00000006777	0	-0.116992	-0.4	Krt23	keratin 23
ENSMUSG00000054362	0	0	-0.4	Lexm	lymphocyte expansion molecule
ENSMUSG00000056215	-0.2	0	-0.4	Lrguk	leucine-rich repeats and guanylate kinase domain containing
ENSMUSG00000030543	0	0	-0.4	Mesp2	mesoderm posterior 2
ENSMUSG00000050526	-0.2	0	-0.4	Mgat4f	MGAT4 family, member F
ENSMUSG00000039313	0	0	-0.4	Minar1	membrane integral NOTCH2 associated receptor 1
ENSMUSG00000080575	0.4	-0.2	-0.4	Mir1190	microRNA 1190
ENSMUSG00000089204	0.316993	0	-0.4	Mir1927	microRNA 1927
ENSMUSG00000089371	-0.2	0	-0.4	Mir1938	microRNA 1938
ENSMUSG00000065411	0.316993	0	-0.4	Mir195a	microRNA 195a
ENSMUSG00000065546	-0.147393	-0.0830075	-0.4	Mir196a-1	microRNA 196a-1
ENSMUSG00000070081	-0.2	0	-0.4	Mir505	microRNA 505
ENSMUSG00000096377	0.2	0	-0.4	Mir5123	microRNA 5123
ENSMUSG00000044058	0	-0.4	-0.4	Mthfr-ps1	5,10-methylenetetrahydrofolate reductase, pseudogene 1
ENSMUSG00000049173	-0.2	0	-0.4	Myoz3	myozenin 3
ENSMUSG00000010311	-0.2	0	-0.4	Optc	opticin
ENSMUSG00000073998	0	0	-0.4	Or2at4	olfactory receptor family 2 subfamily AT member 4
ENSMUSG00000073977	0	-0.2	-0.4	Or52b3	olfactory receptor family 52 subfamily B member 3
ENSMUSG00000009487	0	0	-0.4	Otog	otogelin
ENSMUSG00000022085	-0.033985	-0.4	-0.4	Pebp4	phosphatidylethanolamine binding protein 4
ENSMUSG00000009646	0.2	0	-0.4	Pla2g12b	phospholipase A2, group XIIB
ENSMUSG00000094043	0	-0.2	-0.4	Pramel49	PRAME like 49
ENSMUSG00000042414	0.116992	-0.2	-0.4	Prdm14	PR domain containing 14
ENSMUSG00000062751	0	-0.464386	-0.4	Prss1	protease, serine 1 (trypsin 1)
ENSMUSG00000020907	0.2	0	-0.4	Rcvrn	recoverin
ENSMUSG00000074639	-0.2	0	-0.4	Rdh16f2	RDH16 family member 2
ENSMUSG00000020037	0.2	0	-0.4	Rfx4	regulatory factor X, 4 (influences HLA class II expression)
ENSMUSG00000080542	0.0526069	0	-0.4	Rnu4atac	RNA, U4atac small nuclear (U12-dependent splicing)
ENSMUSG00000082874	-0.2	0	-0.4	Rpl15-ps1	ribosomal protein L15, pseudogene 1
ENSMUSG00000090048	0.2	0	-0.4	Runx2os3	runt related transcription factor 2, opposite strand 3
ENSMUSG00000034533	0	-0.2	-0.4	Scn10a	sodium channel, voltage-gated, type X, alpha
ENSMUSG00000022542	-0.2	-0.4	-0.4	Septin12	septin 12
ENSMUSG00000052180	0	-0.2	-0.4	Serpinb6c	serine (or cysteine) peptidase inhibitor, clade B, member 6c
ENSMUSG00000021795	0	0	-0.4	Sftpd	surfactant associated protein D
ENSMUSG00000094443	0	-0.2	-0.4	Sgo2b	shugoshin 2B
ENSMUSG00000075605	0	-0.2	-0.4	Slurp2	secreted Ly6/Plaur domain containing 2
ENSMUSG00000086731	0.2	0	-0.4	Sox5os5	SRY (sex determining region Y)-box 5, opposite strand 5
ENSMUSG00000039179	-0.116992	-0.483007	-0.4	Tekt5	tektin 5
ENSMUSG00000044528	0	-0.2	-0.4	Tram1l1	translocation associated membrane protein 1-like 1
ENSMUSG00000070298	-0.2	-0.2	-0.4	Trcg1	taste receptor cell gene 1
ENSMUSG00000005952	0	-0.116992	-0.4	Trpv1	transient receptor potential cation channel, subfamily V, member 1
ENSMUSG00000046844	0	0	-0.4	Vat1l	vesicle amine transport protein 1 like
ENSMUSG00000070448	-0.2	-0.2	-0.4	Vmn2r89	vomeronasal 2, receptor 89
ENSMUSG00000044206	0	0	-0.4	Vsig4	V-set and immunoglobulin domain containing 4
ENSMUSG00000036961	0	0.0830075	-0.4	Wnt8b	wingless-type MMTV integration site family, member 8B
ENSMUSG00000019815	0	0	-0.4	Zc2hc1b	zinc finger, C2HC-type containing 1B
ENSMUSG00000044519	0.316993	0	-0.4	Zfp488	zinc finger protein 488
ENSMUSG00000074472	0.2	0	-0.4	Zfp872	zinc finger protein 872
ENSMUSG00000087400	-0.200874	0.00530851	-0.399367	Gm15270	predicted gene 15270
ENSMUSG00000022582	-0.0122059	-0.0324114	-0.398953	Ly6g	lymphocyte antigen 6 complex, locus G
ENSMUSG00000033735	-0.117426	-0.00566259	-0.398436	Spr	sepiapterin reductase
ENSMUSG00000073096	-0.0727187	0.0685693	-0.398154	Lrrc61	leucine rich repeat containing 61
ENSMUSG00000031570	0.121161	0.0902617	-0.398151	Plpp5	phospholipid phosphatase 5
ENSMUSG00000021125	-0.152249	-0.342814	-0.397955	Arg2	arginase type II
ENSMUSG00000098488	0.0220953	0.0582342	-0.397169	Pla2g4b	phospholipase A2, group IVB (cytosolic)
ENSMUSG00000030946	-0.0421681	0.0746245	-0.396348	Lhpp	phospholysine phosphohistidine inorganic pyrophosphate phosphatase
ENSMUSG00000085180	-0.294201	-0.217201	-0.394745	AI838599	expressed sequence AI838599
ENSMUSG00000043801	0.0359866	0.0914388	-0.39198	Oaz1-ps	ornithine decarboxylase antizyme 1, pseudogene
ENSMUSG00000053964	-0.127172	-0.00421981	-0.390827	Lgals4	lectin, galactose binding, soluble 4
ENSMUSG00000030054	0.130942	-0.00112503	-0.390546	Gp9	glycoprotein 9 (platelet)
ENSMUSG00000001943	-0.209461	-0.0366493	-0.390321	Vsig2	V-set and immunoglobulin domain containing 2
ENSMUSG00000037190	0.0128489	-0.0267103	-0.389881	Cyb561d2	cytochrome b-561 domain containing 2
ENSMUSG00000024430	-0.0326997	-0.0186219	-0.388972	Cabyr	calcium-binding tyrosine-(Y)-phosphorylation regulated (fibrousheathin 2)
ENSMUSG00000044707	-0.182032	-0.337742	-0.388683	Ccnjl	cyclin J-like
ENSMUSG00000083416	-0.150977	-0.464386	-0.388221	Gm15378	predicted gene 15378
ENSMUSG00000053310	0.104049	0.137385	-0.388202	Nrgn	neurogranin
ENSMUSG00000097924	-0.18206	-0.0719792	-0.388151	A730020E08Rik	RIKEN cDNA A730020E08 gene
ENSMUSG00000074466	-0.22549	-0.0417173	-0.388101	Gm15417	predicted gene 15417
ENSMUSG00000096579	0.189504	0.122097	-0.38804	Gm17121	predicted gene 17121
ENSMUSG00000035274	-0.123334	0.0444785	-0.387825	Tpbg	trophoblast glycoprotein
ENSMUSG00000005705	0.0777131	0.0465846	-0.387466	Agrp	agouti related neuropeptide
ENSMUSG00000087442	0.118412	-0.136259	-0.387316	Gm14453	predicted gene 14453
ENSMUSG00000080939	0.190396	-0.380093	-0.386577	Gm9208	predicted gene 9208
ENSMUSG00000032578	-0.216732	0.0319608	-0.384845	Cish	cytokine inducible SH2-containing protein
ENSMUSG00000032591	0.0860913	0.0396291	-0.384349	Mst1	macrophage stimulating 1 (hepatocyte growth factor-like)
ENSMUSG00000072769	0.268027	0.050501	-0.384331	Gm10419	predicted gene 10419
ENSMUSG00000081118	0.0480629	-0.0415786	-0.384183	Gm6758	predicted gene 6758
ENSMUSG00000040146	-0.274862	-0.0942514	-0.383546	Rgl3	ral guanine nucleotide dissociation stimulator-like 3
ENSMUSG00000027961	-0.0373779	-0.0443143	-0.383486	Lrrc39	leucine rich repeat containing 39
ENSMUSG00000091811	-0.217131	-0.0473751	-0.383288	Inafm1	InaF motif containing 1
ENSMUSG00000044330	-0.271145	-0.266328	-0.383281	Gm9790	predicted gene 9790
ENSMUSG00000047821	0.219562	0.055795	-0.383139	Trim16	tripartite motif-containing 16
ENSMUSG00000039542	0.102715	0.088394	-0.383064	Ncam1	neural cell adhesion molecule 1
ENSMUSG00000075286	0.241579	0.141444	-0.382556	Gm1968	predicted gene 1968
ENSMUSG00000092916	-0.275188	-0.121939	-0.382283	No associated gene
ENSMUSG00000029361	-0.038529	-0.0153243	-0.381805	Nos1	nitric oxide synthase 1, neuronal
ENSMUSG00000004988	-0.0865919	-0.135614	-0.381378	Fxyd4	FXYD domain-containing ion transport regulator 4
ENSMUSG00000087196	-0.316993	-0.2	-0.381378	Gm13373	predicted gene 13373
ENSMUSG00000059430	0.173319	-0.171573	-0.380459	Actg2	actin, gamma 2, smooth muscle, enteric
ENSMUSG00000028024	0.0577826	-0.229057	-0.379929	Enpep	glutamyl aminopeptidase
ENSMUSG00000024181	-0.107264	0.0550251	-0.379195	Mrpl28	mitochondrial ribosomal protein L28
ENSMUSG00000057123	0.318041	-0.0302337	-0.378309	Gja5	gap junction protein, alpha 5
ENSMUSG00000040631	-0.0505788	0.0221781	-0.377764	Dok4	docking protein 4
ENSMUSG00000041479	-0.098508	-0.11027	-0.377029	Syt15	synaptotagmin XV
ENSMUSG00000082383	-0.0150375	-0.443685	-0.376973	Gm9670	predicted gene 9670
ENSMUSG00000041696	-0.133315	-0.419907	-0.376508	Rasl12	RAS-like, family 12
ENSMUSG00000096722	-0.0752598	-0.186025	-0.376295	Hmgb1-ps9	high mobility group box 1, pseudogene 9
ENSMUSG00000008845	0.0499902	-0.136117	-0.376144	Cd163	CD163 antigen
ENSMUSG00000032470	-0.137792	0.0568745	-0.376063	Mras	muscle and microspikes RAS
ENSMUSG00000095930	-0.204165	-0.00887882	-0.374894	Nim1k	NIM1 serine/threonine protein kinase
ENSMUSG00000002083	-0.0594631	-0.021882	-0.374073	Bbc3	BCL2 binding component 3
ENSMUSG00000036040	-0.0400454	-0.305491	-0.373985	Adamtsl2	ADAMTS-like 2
ENSMUSG00000021619	-0.0878155	0.0784887	-0.373788	Atg10	autophagy related 10
ENSMUSG00000028464	-0.00994245	-0.0321308	-0.37341	Tpm2	tropomyosin 2, beta
ENSMUSG00000050628	0.186616	0.15495	-0.372988	Ubald2	UBA-like domain containing 2
ENSMUSG00000001865	-0.0281557	0.0412902	-0.372499	Cpa3	carboxypeptidase A3, mast cell
ENSMUSG00000089817	-0.0915025	-0.0239163	-0.372499	Gm7162	predicted gene 7162
ENSMUSG00000051504	-0.232273	-0.0546367	-0.372467	Siglech	sialic acid binding Ig-like lectin H
ENSMUSG00000018537	-0.282825	-0.179114	-0.372367	Pcgf2	polycomb group ring finger 2
ENSMUSG00000074978	0.173023	0.118464	-0.372072	Actg-ps1	actin, gamma, pseudogene 1
ENSMUSG00000031847	-0.115707	-0.444478	-0.371964	1700030J22Rik	RIKEN cDNA 1700030J22 gene
ENSMUSG00000040749	0.0219049	0.106466	-0.371815	Siah1b	siah E3 ubiquitin protein ligase 1B
ENSMUSG00000028988	-0.1071	0.0624439	-0.371783	Ctnnbip1	catenin beta interacting protein 1
ENSMUSG00000020441	-0.120846	0.0255361	-0.37153	2310033P09Rik	RIKEN cDNA 2310033P09 gene
ENSMUSG00000097379	-0.0651479	0.0859925	-0.37127	Gm26873	predicted gene, 26873
ENSMUSG00000087669	-0.20727	-0.15229	-0.369701	Gm11724	predicted gene 11724
ENSMUSG00000061576	0.102915	-0.0526069	-0.369599	Dpp6	dipeptidylpeptidase 6
ENSMUSG00000088712	-0.188221	-0.411779	-0.369599	Gm22728	predicted gene, 22728
ENSMUSG00000029530	-0.324408	-0.138606	-0.368582	Ccr9	chemokine (C-C motif) receptor 9
ENSMUSG00000022179	0.104163	0.0750916	-0.368523	4931414P19Rik	RIKEN cDNA 4931414P19 gene
ENSMUSG00000026235	-0.184566	-0.171243	-0.368314	Epha4	Eph receptor A4
ENSMUSG00000033066	-0.25036	-0.0132783	-0.368282	Gas7	growth arrest specific 7
ENSMUSG00000097633	-0.0521797	0.0163394	-0.367955	Gm16617	predicted gene, 16617
ENSMUSG00000034765	-0.0811925	0.0792276	-0.36788	Dusp5	dual specificity phosphatase 5
ENSMUSG00000034259	-0.0825781	0.0527351	-0.366487	Exosc4	exosome component 4
ENSMUSG00000032118	-0.0326997	-0.350977	-0.366015	Fez1	fasciculation and elongation protein zeta 1 (zygin I)
ENSMUSG00000026344	0.161471	-0.4	-0.366015	Lypd1	Ly6/Plaur domain containing 1
ENSMUSG00000026207	-0.0366905	-0.0324598	-0.365446	Speg	SPEG complex locus
ENSMUSG00000001524	-0.0410173	0.0878258	-0.365258	Gtf2h4	general transcription factor II H, polypeptide 4
ENSMUSG00000006586	0.0474298	-0.0378269	-0.364463	Runx1t1	RUNX1 translocation partner 1
ENSMUSG00000028392	0.292364	0.067732	-0.3644	Bspry	B-box and SPRY domain containing
ENSMUSG00000054945	-0.263425	-0.298631	-0.363991	Gm9958	predicted gene 9958
ENSMUSG00000089756	-0.180093	0.0259657	-0.363331	Zfp966	zinc finger protein 966
ENSMUSG00000025983	-0.072514	-0.173835	-0.363125	Ccdc150	coiled-coil domain containing 150
ENSMUSG00000097786	-0.0121417	-0.150394	-0.362772	4933429H19Rik	RIKEN cDNA 4933429H19 gene
ENSMUSG00000074652	0.1369	-0.0275007	-0.362241	Myh7b	myosin, heavy chain 7B, cardiac muscle, beta
ENSMUSG00000097514	-0.0830075	-0.0830075	-0.361471	No associated gene
ENSMUSG00000081263	-0.0784635	-0.0562572	-0.361471	Gm14859	predicted gene 14859
ENSMUSG00000064612	0.106499	-0.424571	-0.361471	Gm26457	predicted gene, 26457
ENSMUSG00000032925	-0.0658628	-0.461805	-0.36145	Itgbl1	integrin, beta-like 1
ENSMUSG00000094185	-0.0205622	0.0280355	-0.360845	Gm5445	predicted gene 5445
ENSMUSG00000033585	-0.199051	0.0200556	-0.360469	Ndn	necdin, MAGE family member
ENSMUSG00000035640	-0.0850065	-0.00435848	-0.36003	Cbarp	calcium channel, voltage-dependent, beta subunit associated regulatory protein
ENSMUSG00000024959	0.0350574	0.0769388	-0.359956	Bad	BCL2-associated agonist of cell death
ENSMUSG00000090028	-0.0809214	-0.0225986	-0.359943	No associated gene
ENSMUSG00000085436	-0.0815066	-0.0875012	-0.3596	Zfp335os	zinc finger protein 335, opposite strand
ENSMUSG00000020475	0.240657	0.103712	-0.359591	Pgam2	phosphoglycerate mutase 2
ENSMUSG00000090136	0.141623	0.155258	-0.35957	Gm10177	predicted gene 10177
ENSMUSG00000048334	-0.19936	-0.141079	-0.359294	Gm8258	predicted gene 8258
ENSMUSG00000044377	-0.0105524	0.041754	-0.35816	Gm13080	predicted gene 13080
ENSMUSG00000041679	0.334806	-0.0822371	-0.35756	Fbxl9	F-box and leucine-rich repeat protein 9
ENSMUSG00000020514	0.0806553	0.14126	-0.356789	Mrpl22	mitochondrial ribosomal protein L22
ENSMUSG00000097258	-0.0550007	0.0166432	-0.355581	No associated gene
ENSMUSG00000046378	-0.211683	-0.107805	-0.355522	Asphd1	aspartate beta-hydroxylase domain containing 1
ENSMUSG00000090141	-0.00765953	0.0823135	-0.355228	Gm614	predicted gene 614
ENSMUSG00000024137	-0.0851271	0.0566496	-0.355046	E4f1	E4F transcription factor 1
ENSMUSG00000031099	-0.0784635	-0.0261349	-0.354987	Smarca1	SWI/SNF related, matrix associated, actin dependent regulator of chromatin, subfamily a, member 1
ENSMUSG00000029095	-0.13672	-0.0926584	-0.354739	Ablim2	actin-binding LIM protein 2
ENSMUSG00000021102	0.0247154	-0.407827	-0.354647	Glrx5	glutaredoxin 5
ENSMUSG00000024124	-0.0385081	-0.0325539	-0.354533	Prss30	protease, serine 30
ENSMUSG00000050541	-0.0882065	-0.444478	-0.354236	Adra1b	adrenergic receptor, alpha 1b
ENSMUSG00000076864	-0.161471	0.00454402	-0.353343	Trdv1	T cell receptor delta variable 1
ENSMUSG00000003949	0.263663	0.107713	-0.353128	Hlf	hepatic leukemia factor
ENSMUSG00000021572	-0.12576	-0.128849	-0.352951	Cep72	centrosomal protein 72
ENSMUSG00000064918	-0.069516	0.0792867	-0.352881	Gm22571	predicted gene, 22571
ENSMUSG00000089707	0.0369828	0.0836588	-0.352081	Slain1os	SLAIN motif family, member 1, opposite strand
ENSMUSG00000074149	0.233985	-0.211779	-0.350977	Gm10634	predicted gene 10634
ENSMUSG00000002980	-0.0765724	0.059224	-0.350187	Bcam	basal cell adhesion molecule
ENSMUSG00000070509	-0.105476	-0.060079	-0.349788	Rgma	repulsive guidance molecule family member A
ENSMUSG00000058700	0.135614	0.116992	-0.349692	Rpl21-ps12	ribosomal protein L21, pseudogene 12
ENSMUSG00000013419	0.0490807	-0.0805622	-0.348722	Zfp651	zinc finger protein 651
ENSMUSG00000029408	0.117914	0.0863176	-0.348693	Abcb9	ATP-binding cassette, sub-family B (MDR/TAP), member 9
ENSMUSG00000017007	0.0571283	-0.143057	-0.34856	Rbpjl	recombination signal binding protein for immunoglobulin kappa J region-like
ENSMUSG00000027080	-0.0438965	-0.0112977	-0.348426	Med19	mediator complex subunit 19
ENSMUSG00000030188	-0.0401928	0.0953697	-0.34834	Magohb	mago homolog B, exon junction complex core component
ENSMUSG00000047988	-0.1935	-0.35456	-0.348326	4933428G20Rik	RIKEN cDNA 4933428G20 gene
ENSMUSG00000082032	0.214078	0.0947862	-0.347393	Gm12271	predicted gene 12271
ENSMUSG00000086949	0.238937	-0.0289247	-0.347393	Gm13066	predicted gene 13066
ENSMUSG00000081544	0.316993	-0.169599	-0.347393	Gm13077	predicted gene 13077
ENSMUSG00000087163	-0.033985	-0.369599	-0.347393	Gm16230	predicted gene 16230
ENSMUSG00000091184	0.2	-0.230401	-0.347393	Gm17059	predicted gene 17059
ENSMUSG00000086119	-0.0643856	-0.306499	-0.347393	Gm2415	predicted gene 2415
ENSMUSG00000098692	-0.2	-0.316993	-0.347393	Gm28041	predicted gene, 28041
ENSMUSG00000071478	0.313102	0.171573	-0.347393	H2ac7	H2A clustered histone 7
ENSMUSG00000038374	-0.103773	0.0388879	-0.347248	Rbm8a	RNA binding motif protein 8a
ENSMUSG00000047844	-0.100602	-0.494761	-0.346876	Bex4	brain expressed X-linked 4
ENSMUSG00000022414	-0.0157681	0.0126585	-0.345983	Tab1	TGF-beta activated kinase 1/MAP3K7 binding protein 1
ENSMUSG00000067818	-0.0538358	-0.0161133	-0.345875	Myl9	myosin, light polypeptide 9, regulatory
ENSMUSG00000025068	-0.183567	0.0426231	-0.345843	Gsto1	glutathione S-transferase omega 1
ENSMUSG00000096981	-0.173894	-0.0974931	-0.345808	Gm16845	predicted gene, 16845
ENSMUSG00000075555	-0.231635	-0.236519	-0.345055	Gm10863	predicted gene 10863
ENSMUSG00000024352	0.0779725	0.121443	-0.34501	Spata24	spermatogenesis associated 24
ENSMUSG00000032507	-0.180343	0.0446099	-0.344547	Fbxl2	F-box and leucine-rich repeat protein 2
ENSMUSG00000040658	0.409187	-0.0991982	-0.343476	Dnph1	2'-deoxynucleoside 5'-phosphate N-hydrolase 1
ENSMUSG00000087067	-0.0433392	-0.283663	-0.343086	Gm11532	predicted gene 11532
ENSMUSG00000019874	-0.288715	-0.0761877	-0.34287	Fabp7	fatty acid binding protein 7, brain
ENSMUSG00000056938	0.0888867	0.110456	-0.342426	Acbd4	acyl-Coenzyme A binding domain containing 4
ENSMUSG00000038560	-0.10925	-0.277713	-0.342194	Sp6	trans-acting transcription factor 6
ENSMUSG00000085519	0.322287	-0.137385	-0.341564	Gm13703	predicted gene 13703
ENSMUSG00000086994	0.0487984	0.0386693	-0.341305	Gm13402	predicted gene 13402
ENSMUSG00000035007	-0.0109555	0.110499	-0.340637	Rundc1	RUN domain containing 1
ENSMUSG00000030494	0.144632	-0.128842	-0.33978	Rhpn2	rhophilin, Rho GTPase binding protein 2
ENSMUSG00000038010	0.0244623	-0.0885964	-0.339344	Ccdc138	coiled-coil domain containing 138
ENSMUSG00000043639	0.177794	-0.405228	-0.339199	Rbm20	RNA binding motif protein 20
ENSMUSG00000067780	-0.0803363	-0.188992	-0.339141	Pi15	peptidase inhibitor 15
ENSMUSG00000029108	-0.337223	-0.162232	-0.338661	Pcdh7	protocadherin 7
ENSMUSG00000027318	-0.139823	-0.159161	-0.338431	Adam33	a disintegrin and metallopeptidase domain 33
ENSMUSG00000041126	-0.0605613	-0.0185288	-0.338121	H2az2	H2A.Z histone variant 2
ENSMUSG00000074865	0.0669221	0.115866	-0.337881	Zfp934	zinc finger protein 934
ENSMUSG00000011096	-0.113601	-0.0881139	-0.337878	Akt1s1	AKT1 substrate 1 (proline-rich)
ENSMUSG00000044986	0.0944876	-0.0529794	-0.336746	Tst	thiosulfate sulfurtransferase, mitochondrial
ENSMUSG00000073155	0.10896	-0.00288081	-0.336435	Stmp1	short transmembrane mitochondrial protein 1
ENSMUSG00000073434	0.00875122	0.0212779	-0.335976	Wdr90	WD repeat domain 90
ENSMUSG00000073821	0.283008	0.0983706	-0.335614	8030451A03Rik	RIKEN cDNA 8030451A03 gene
ENSMUSG00000047495	0.316993	0	-0.335614	Dlgap2	DLG associated protein 2
ENSMUSG00000070644	0.316993	-0.233985	-0.335614	Etnk2	ethanolamine kinase 2
ENSMUSG00000093525	0.0258566	-0.306499	-0.335614	Gm8974	predicted gene 8974
ENSMUSG00000026969	0.0665108	0.000680855	-0.33545	Fam166a	family with sequence similarity 166, member A
ENSMUSG00000055652	0.048148	0.0853609	-0.335449	Klhl25	kelch-like 25
ENSMUSG00000007570	-0.110765	0.0384274	-0.33525	Fance	Fanconi anemia, complementation group E
ENSMUSG00000029392	0.183932	0.158778	-0.335086	Rilpl1	Rab interacting lysosomal protein-like 1
ENSMUSG00000032135	-0.15667	-0.100612	-0.334705	Mcam	melanoma cell adhesion molecule
ENSMUSG00000047547	-0.167525	0.0186139	-0.334553	Cltb	clathrin, light polypeptide (Lcb)
ENSMUSG00000081128	-0.121788	-0.12171	-0.333778	Gm13328	predicted gene 13328
ENSMUSG00000089727	-0.033985	-0.150977	-0.333315	Klra8	killer cell lectin-like receptor, subfamily A, member 8
ENSMUSG00000015647	-0.160498	0.0290806	-0.333136	Lama5	laminin, alpha 5
ENSMUSG00000033170	-0.157568	-0.126426	-0.332246	Card10	caspase recruitment domain family, member 10
ENSMUSG00000078700	0.0699482	-0.0938209	-0.331977	D030028A08Rik	RIKEN cDNA D030028A08 gene
ENSMUSG00000031901	-0.187073	-0.0472084	-0.331446	Dus2	dihydrouridine synthase 2
ENSMUSG00000026796	0.0974127	0.0878137	-0.331292	Niban2	niban apoptosis regulator 2
ENSMUSG00000082938	-0.038703	-0.234262	-0.331176	Gm2810	predicted pseudogene 2810
ENSMUSG00000092241	0.195157	0.147928	-0.330415	Gm20522	predicted gene 20522
ENSMUSG00000050702	-0.210493	-0.194051	-0.329785	4930563M21Rik	RIKEN cDNA 4930563M21 gene
ENSMUSG00000039382	-0.112214	-0.000875727	-0.329398	Wdr45	WD repeat domain 45
ENSMUSG00000046470	0.054583	0.124928	-0.329214	Sox18	SRY (sex determining region Y)-box 18
ENSMUSG00000048442	-0.106254	-0.180195	-0.329207	Smim5	small integral membrane protein 5
ENSMUSG00000035397	-0.0467078	0.0274574	-0.329093	Klf16	Kruppel-like transcription factor 16
ENSMUSG00000020695	0.0328689	-0.100102	-0.329023	Mrc2	mannose receptor, C type 2
ENSMUSG00000019929	-0.0458646	-0.0433937	-0.328937	Dcn	decorin
ENSMUSG00000097526	-0.100405	-0.19088	-0.328893	No associated gene
ENSMUSG00000025381	-0.0189689	0.073188	-0.328831	Cnpy2	canopy FGF signaling regulator 2
ENSMUSG00000097926	0.283008	-0.184637	-0.328771	Gm26575	predicted gene, 26575
ENSMUSG00000080610	0	-0.116992	-0.328771	Snord110	small nucleolar RNA, C/D box 110
ENSMUSG00000003352	0.0841559	0.00503287	-0.328709	Cacnb3	calcium channel, voltage-dependent, beta 3 subunit
ENSMUSG00000060224	0.104398	-0.0425003	-0.328405	Pyroxd2	pyridine nucleotide-disulphide oxidoreductase domain 2
ENSMUSG00000063586	0.108864	0.0555068	-0.328309	Gm5513	predicted pseudogene 5513
ENSMUSG00000024220	0.0105163	0.1036	-0.328077	Zfp523	zinc finger protein 523
ENSMUSG00000046152	0.0235426	0.0606026	-0.327188	Fut10	fucosyltransferase 10
ENSMUSG00000083139	-0.192644	-0.092298	-0.326789	Gm12418	predicted gene 12418
ENSMUSG00000034271	-0.000640486	0.00704593	-0.325542	Jdp2	Jun dimerization protein 2
ENSMUSG00000073705	-0.161392	0.0600962	-0.325494	Cenps	centromere protein S
ENSMUSG00000015474	-0.084039	0.0900787	-0.325393	Ppt2	palmitoyl-protein thioesterase 2
ENSMUSG00000021575	-0.139862	-0.125796	-0.325308	Ahrr	aryl-hydrocarbon receptor repressor
ENSMUSG00000095771	0.0554133	-0.412776	-0.325144	Igkv14-111	immunoglobulin kappa variable 14-111
ENSMUSG00000032334	0.00207214	-0.053563	-0.324544	Loxl1	lysyl oxidase-like 1
ENSMUSG00000068196	-0.182201	-0.153907	-0.323931	Col8a1	collagen, type VIII, alpha 1
ENSMUSG00000031458	-0.113207	-0.369311	-0.32367	Coprs	coordinator of PRMT5, differentiation stimulator
ENSMUSG00000034175	0.00160229	0.0829169	-0.323169	Rhbdd3	rhomboid domain containing 3
ENSMUSG00000040158	0.104986	0.0327622	-0.323161	Tax1bp3	Tax1 (human T cell leukemia virus type I) binding protein 3
ENSMUSG00000018449	-0.185842	-0.0397773	-0.323134	Rpain	RPA interacting protein
ENSMUSG00000025656	-0.0138532	-0.0563998	-0.322795	Arhgef9	CDC42 guanine nucleotide exchange factor (GEF) 9
ENSMUSG00000062438	-0.0654462	0.0199992	-0.322726	Adam1b	a disintegrin and metallopeptidase domain 1b
ENSMUSG00000097605	-0.0637752	0.0911089	-0.322573	No associated gene
ENSMUSG00000024274	0.0983706	-0.160186	-0.322192	Zscan30	zinc finger and SCAN domain containing 30
ENSMUSG00000046387	-0.203772	-0.211149	-0.321657	Pcdhb17	protocadherin beta 17
ENSMUSG00000042709	-0.121167	0.0585368	-0.321522	Atpaf2	ATP synthase mitochondrial F1 complex assembly factor 2
ENSMUSG00000030917	-0.215928	-0.0586161	-0.321231	Ldaf1	lipid droplet assembly factor 1
ENSMUSG00000016458	-0.147569	-0.0395996	-0.321034	Wt1	WT1 transcription factor
ENSMUSG00000060429	-0.0836214	0.0611448	-0.32033	Sntb1	syntrophin, basic 1
ENSMUSG00000047878	-0.039749	0.0204763	-0.320027	A4galt	alpha 1,4-galactosyltransferase
ENSMUSG00000078620	-0.225857	-0.0199071	-0.319892	Gm10964	predicted gene 10964
ENSMUSG00000040003	0.045625	-0.178749	-0.319011	Magi2	membrane associated guanylate kinase, WW and PDZ domain containing 2
ENSMUSG00000001663	-0.0305415	-0.246395	-0.31896	Gstt1	glutathione S-transferase, theta 1
ENSMUSG00000003227	-0.238529	-0.331209	-0.317743	Edar	ectodysplasin-A receptor
ENSMUSG00000078667	-0.217249	-0.00149784	-0.317738	No associated gene
ENSMUSG00000028600	0.16365	-0.248635	-0.317705	Podn	podocan
ENSMUSG00000080968	-0.228799	-0.090783	-0.317433	Atf1-ps	activating transcription factor 1, pseudogene
ENSMUSG00000083454	0.148502	0.079816	-0.317297	Gm13226	predicted gene 13226
ENSMUSG00000035349	0	0	-0.316993	No associated gene
ENSMUSG00000077846	0.2	0	-0.316993	No associated gene
ENSMUSG00000080410	0	-0.2	-0.316993	No associated gene
ENSMUSG00000080506	0.116992	-0.2	-0.316993	No associated gene
ENSMUSG00000083479	0.283008	-0.2	-0.316993	No associated gene
ENSMUSG00000088519	0	-0.2	-0.316993	No associated gene
ENSMUSG00000088631	0.2	0	-0.316993	No associated gene
ENSMUSG00000089120	0.316993	-0.2	-0.316993	No associated gene
ENSMUSG00000092851	0.2	0.116992	-0.316993	No associated gene
ENSMUSG00000092932	0	0	-0.316993	No associated gene
ENSMUSG00000093322	0.316993	-0.2	-0.316993	No associated gene
ENSMUSG00000094780	-0.2	-0.2	-0.316993	No associated gene
ENSMUSG00000095552	0.298371	0	-0.316993	No associated gene
ENSMUSG00000095892	0	-0.2	-0.316993	No associated gene
ENSMUSG00000096310	0	-0.2	-0.316993	No associated gene
ENSMUSG00000096808	0	0	-0.316993	No associated gene
ENSMUSG00000097540	0	0	-0.316993	No associated gene
ENSMUSG00000098308	0.2	0	-0.316993	No associated gene
ENSMUSG00000099296	0	0	-0.316993	No associated gene
ENSMUSG00000046119	0	0	-0.316993	1110008E08Rik	RIKEN cDNA 1110008E08 gene
ENSMUSG00000068957	0	0	-0.316993	4930589L23Rik	RIKEN cDNA 4930589L23 gene
ENSMUSG00000096256	0.298371	0	-0.316993	4933409K07Rik	RIKEN cDNA 4933409K07 gene
ENSMUSG00000045345	0.2	0	-0.316993	9530056K15Rik	RIKEN cDNA 9530056K15 gene
ENSMUSG00000051900	-0.2	-0.2	-0.316993	Abca16	ATP-binding cassette, sub-family A (ABC1), member 16
ENSMUSG00000092519	-0.2	-0.316993	-0.316993	Actl9	actin-like 9
ENSMUSG00000037737	-0.2	-0.2	-0.316993	Actrt3	actin related protein T3
ENSMUSG00000053441	-0.0830075	0	-0.316993	Adamts19	a disintegrin-like and metallopeptidase (reprolysin type) with thrombospondin type 1 motif, 19
ENSMUSG00000006269	0	-0.2	-0.316993	Atp6v1b1	ATPase, H+ transporting, lysosomal V1 subunit B1
ENSMUSG00000091956	0.316993	0.2	-0.316993	C2cd4b	C2 calcium-dependent domain containing 4B
ENSMUSG00000045912	0	0.0830075	-0.316993	C2cd4c	C2 calcium-dependent domain containing 4C
ENSMUSG00000039508	0	0	-0.316993	Calhm4	calcium homeostasis modulator family member 4
ENSMUSG00000043913	0.116992	-0.4	-0.316993	Ccdc60	coiled-coil domain containing 60
ENSMUSG00000083937	-0.0526069	-0.483007	-0.316993	Cct3-ps1	chaperonin containing Tcp1, subunit 3 (gamma) pseudogene 1
ENSMUSG00000006204	0	0	-0.316993	Cdcp3	CUB domain containing protein 3
ENSMUSG00000074240	0.316993	-0.0830075	-0.316993	Cib3	calcium and integrin binding family member 3
ENSMUSG00000033770	0	-0.2	-0.316993	Clcnka	chloride channel, voltage-sensitive Ka
ENSMUSG00000025431	-0.316993	-0.2	-0.316993	Crisp1	cysteine-rich secretory protein 1
ENSMUSG00000024846	0	0	-0.316993	Cst6	cystatin E/M
ENSMUSG00000060613	0	-0.316993	-0.316993	Cyp2c70	cytochrome P450, family 2, subfamily c, polypeptide 70
ENSMUSG00000081006	-0.2	0	-0.316993	Cyp4b1-ps1	cytochrome P450, family 4, subfamily b, polypeptide 1, pseudogene 1
ENSMUSG00000097393	0	0	-0.316993	D030068K23Rik	RIKEN cDNA D030068K23 gene
ENSMUSG00000006711	0.0830075	-0.283008	-0.316993	D130043K22Rik	RIKEN cDNA D130043K22 gene
ENSMUSG00000056359	0	0	-0.316993	D830013O20Rik	RIKEN cDNA D830013O20 gene
ENSMUSG00000031323	0	0	-0.316993	Dmrtc1a	DMRT-like family C1a
ENSMUSG00000027186	0.033985	-0.316993	-0.316993	Elf5	E74-like factor 5
ENSMUSG00000026830	0.2	0	-0.316993	Ermn	ermin, ERM-like protein
ENSMUSG00000027356	0.2	0	-0.316993	Fermt1	fermitin family member 1
ENSMUSG00000026841	0.135614	-0.316993	-0.316993	Fibcd1	fibrinogen C domain containing 1
ENSMUSG00000079606	0.4	0	-0.316993	Fsip2l	fibrous sheath-interacting protein 2-like
ENSMUSG00000078650	0	0	-0.316993	G6pc	glucose-6-phosphatase, catalytic
ENSMUSG00000070111	0.116992	-0.116992	-0.316993	Gm10286	predicted gene 10286
ENSMUSG00000073367	0	-0.116992	-0.316993	Gm10493	predicted gene 10493
ENSMUSG00000078655	0.2	0	-0.316993	Gm10972	predicted gene 10972
ENSMUSG00000081632	0	0	-0.316993	Gm11443	predicted gene 11443
ENSMUSG00000085991	-0.2	0	-0.316993	Gm11479	predicted gene 11479
ENSMUSG00000087399	0.316993	0.2	-0.316993	Gm11899	predicted gene 11899
ENSMUSG00000083872	0	0	-0.316993	Gm11928	predicted gene 11928
ENSMUSG00000086373	-0.2	0	-0.316993	Gm11978	predicted gene 11978
ENSMUSG00000084259	0	-0.4	-0.316993	Gm12040	predicted gene 12040
ENSMUSG00000082688	0	0	-0.316993	Gm12124	predicted gene 12124
ENSMUSG00000082587	0	-0.2	-0.316993	Gm12129	predicted gene 12129
ENSMUSG00000082390	0.4	0	-0.316993	Gm12136	predicted gene 12136
ENSMUSG00000087383	0	0	-0.316993	Gm12446	predicted gene 12446
ENSMUSG00000085235	0	-0.4	-0.316993	Gm12576	predicted gene 12576
ENSMUSG00000073765	0	0	-0.316993	Gm12863	predicted gene 12863
ENSMUSG00000086845	0	0	-0.316993	Gm13010	predicted gene 13010
ENSMUSG00000084160	0	0	-0.316993	Gm13345	predicted gene 13345
ENSMUSG00000084198	0	-0.2	-0.316993	Gm13711	predicted gene 13711
ENSMUSG00000081907	0.2	-0.2	-0.316993	Gm13731	predicted gene 13731
ENSMUSG00000082369	0	0.116992	-0.316993	Gm14208	predicted gene 14208
ENSMUSG00000084308	0	0	-0.316993	Gm14593	predicted gene 14593
ENSMUSG00000082311	0	0	-0.316993	Gm14791	predicted gene 14791
ENSMUSG00000082974	0.4	0	-0.316993	Gm15129	predicted gene 15129
ENSMUSG00000083719	0.316993	-0.116992	-0.316993	Gm15161	predicted gene 15161
ENSMUSG00000086679	0.06797	-0.433985	-0.316993	Gm15551	predicted gene 15551
ENSMUSG00000078972	0	0	-0.316993	Gm15557	predicted gene 15557
ENSMUSG00000087319	0	-0.4	-0.316993	Gm15907	predicted gene 15907
ENSMUSG00000087507	0.033985	-0.233985	-0.316993	Gm16141	predicted gene 16141
ENSMUSG00000084343	0	0	-0.316993	Gm16198	predicted gene 16198
ENSMUSG00000084991	0.4	-0.116992	-0.316993	Gm16260	predicted gene 16260
ENSMUSG00000086989	0.4	0	-0.316993	Gm16441	predicted pseudogene 16441
ENSMUSG00000082090	0	-0.316993	-0.316993	Gm16481	predicted gene 16481
ENSMUSG00000091041	0	-0.116992	-0.316993	Gm17720	predicted gene, 17720
ENSMUSG00000092463	0	0	-0.316993	Gm20489	predicted gene 20489
ENSMUSG00000096463	0	0	-0.316993	Gm21750	predicted gene, 21750
ENSMUSG00000095262	0	0	-0.316993	Gm21893	predicted gene, 21893
ENSMUSG00000065664	-0.2	-0.316993	-0.316993	Gm22578	predicted gene, 22578
ENSMUSG00000064671	0	0	-0.316993	Gm22807	predicted gene, 22807
ENSMUSG00000097628	0	0	-0.316993	Gm2383	predicted gene 2383
ENSMUSG00000092674	0	0	-0.316993	Gm24105	predicted gene, 24105
ENSMUSG00000093249	-0.2	0	-0.316993	Gm24576	predicted gene, 24576
ENSMUSG00000064982	0	0	-0.316993	Gm25259	predicted gene, 25259
ENSMUSG00000089124	-0.2	0	-0.316993	Gm26402	predicted gene, 26402
ENSMUSG00000097684	-0.2	-0.316993	-0.316993	Gm26645	predicted gene, 26645
ENSMUSG00000097406	0	0	-0.316993	Gm26833	predicted gene, 26833
ENSMUSG00000097967	0	-0.2	-0.316993	Gm27002	predicted gene, 27002
ENSMUSG00000097998	0.316993	-0.116992	-0.316993	Gm27019	predicted gene, 27019
ENSMUSG00000098211	-0.2	0	-0.316993	Gm27045	predicted gene, 27045
ENSMUSG00000093909	0.298371	0.116992	-0.316993	Gm3883	predicted gene 3883
ENSMUSG00000061486	0	-0.4	-0.316993	Gm5161	predicted pseudogene 5161
ENSMUSG00000081084	0	0	-0.316993	Gm5638	predicted gene 5638
ENSMUSG00000063885	0.283008	0	-0.316993	Gm6498	predicted gene 6498
ENSMUSG00000097806	-0.2	0	-0.316993	Gm6556	predicted gene 6556
ENSMUSG00000091902	-0.2	-0.0490225	-0.316993	Gm6918	predicted gene 6918
ENSMUSG00000087255	0	-0.2	-0.316993	Gm6985	predicted pseudogene 6985
ENSMUSG00000094151	0	0	-0.316993	Gm7233	predicted gene 7233
ENSMUSG00000092577	0	-0.2	-0.316993	Gm7393	predicted gene 7393
ENSMUSG00000098093	0	0	-0.316993	Gm8707	predicted gene 8707
ENSMUSG00000080899	0	-0.2	-0.316993	Gm9109	predicted gene 9109
ENSMUSG00000056978	0	-0.2	-0.316993	Hamp2	hepcidin antimicrobial peptide 2
ENSMUSG00000001661	0.116992	0.0830075	-0.316993	Hoxc6	homeobox C6
ENSMUSG00000076430	0.116992	-0.381378	-0.316993	Hus1b	HUS1 checkpoint clamp component B
ENSMUSG00000093876	-0.116992	-0.0830075	-0.316993	Ighd5-3	immunoglobulin heavy diversity 5-3
ENSMUSG00000058740	0.116992	-0.2	-0.316993	Kcnt1	potassium channel, subfamily T, member 1
ENSMUSG00000036915	-0.316993	-0.2	-0.316993	Kirrel2	kirre like nephrin family adhesion molecule 2
ENSMUSG00000022875	0	0	-0.316993	Kng1	kininogen 1
ENSMUSG00000023120	0	0	-0.316993	Ldc1	leucine decarboxylase 1
ENSMUSG00000047728	0.116992	0	-0.316993	Ly6g2	lymphocyte antigen 6 complex, locus G2
ENSMUSG00000065580	0	0	-0.316993	Mir15b	microRNA 15b
ENSMUSG00000070106	-0.2	0	-0.316993	Mir363	microRNA 363
ENSMUSG00000070139	-0.2	0	-0.316993	Mir532	microRNA 532
ENSMUSG00000093757	-0.0830075	-0.4	-0.316993	Mir5623	microRNA 5623
ENSMUSG00000076011	-0.2	0	-0.316993	Mir652	microRNA 652
ENSMUSG00000098858	0	0	-0.316993	Mir6541	microRNA 6541
ENSMUSG00000076212	0	0	-0.316993	Mir680-1	microRNA 680-1
ENSMUSG00000098625	0	0	-0.316993	Mir6953	microRNA 6953
ENSMUSG00000074109	0	0	-0.316993	Mrgprx2	MAS-related GPR, member X2
ENSMUSG00000019933	0	0	-0.316993	Mrln	myoregulin
ENSMUSG00000030131	0	0	-0.316993	Mug2	murinoglobulin 2
ENSMUSG00000081041	0	-0.0830075	-0.316993	Nlk-ps1	nemo like kinase, pseudogene 1
ENSMUSG00000083544	0	-0.4	-0.316993	Oat-rs1	ornithine aminotransferase related sequence 1
ENSMUSG00000072707	0	0	-0.316993	Or2t1	olfactory receptor family 2 subfamily T member 1
ENSMUSG00000062204	0	0	-0.316993	Or2y8	olfactory receptor family 2 subfamily Y member 8
ENSMUSG00000044994	0	-0.2	-0.316993	Or4d10c	olfactory receptor family 4 subfamily D member 10C
ENSMUSG00000047545	0	0	-0.316993	Or52ae9	olfactory receptor family 52 subfamily AE member 9
ENSMUSG00000011118	0	-0.4	-0.316993	Panx3	pannexin 3
ENSMUSG00000091215	0.116992	0	-0.316993	Pate1	prostate and testis expressed 1
ENSMUSG00000023987	0.316993	0	-0.316993	Pgc	progastricsin (pepsinogen C)
ENSMUSG00000081463	0.2	-0.2	-0.316993	Pou5f1-rs13	POU domain, class 5, transcription factor 1, related sequence 13
ENSMUSG00000030350	0.2	0	-0.316993	Prmt8	protein arginine N-methyltransferase 8
ENSMUSG00000021966	0	0	-0.316993	Prss52	protease, serine 52
ENSMUSG00000043430	0	-0.2	-0.316993	Psapl1	prosaposin-like 1
ENSMUSG00000068407	-0.2	-0.347393	-0.316993	Rnase12	ribonuclease, RNase A family, 12 (non-active)
ENSMUSG00000051920	-0.2	0	-0.316993	Rspo2	R-spondin 2
ENSMUSG00000078752	0.4	-0.2	-0.316993	Scgb1b30	secretoglobin, family 1B, member 30
ENSMUSG00000040127	0	-0.2	-0.316993	Sdr9c7	4short chain dehydrogenase/reductase family 9C, member 7
ENSMUSG00000081433	0.316993	0	-0.316993	Serpinb1-ps1	serine (or cysteine) peptidase inhibitor, clade B, member 1, pseudogene
ENSMUSG00000038327	0.316993	-0.2	-0.316993	Serpinb9f	serine (or cysteine) peptidase inhibitor, clade B, member 9f
ENSMUSG00000058159	0.2	0	-0.316993	T2	brachyury 2
ENSMUSG00000061762	0	0	-0.316993	Tac1	tachykinin 1
ENSMUSG00000036574	0	0	-0.316993	Tex44	testis expressed 44
ENSMUSG00000092429	0	0	-0.316993	Tprgl-ps1	transformation related protein 63 regulated like, pseudogene 1
ENSMUSG00000042828	0.2	-0.361471	-0.316993	Trim72	tripartite motif-containing 72
ENSMUSG00000074673	0.4	0	-0.316993	Ttll9	tubulin tyrosine ligase-like family, member 9
ENSMUSG00000085794	0	0	-0.316993	Vax2os	ventral anterior homeobox 2, opposite strand
ENSMUSG00000095909	0	0	-0.316993	Zfp997	zinc finger protein 997
ENSMUSG00000096594	-0.151752	0.0322102	-0.316436	Igkv8-19	immunoglobulin kappa variable 8-19
ENSMUSG00000029781	-0.0710955	0.0910201	-0.315988	Fkbp9	FK506 binding protein 9
ENSMUSG00000072437	-0.187284	-0.315318	-0.315759	Nanos1	nanos C2HC-type zinc finger 1
ENSMUSG00000006732	-0.134169	0.0588711	-0.315216	Mettl1	methyltransferase 1, tRNA methylguanosine
ENSMUSG00000038150	-0.13598	0.000776191	-0.31484	Ormdl3	ORM1-like 3 (S. cerevisiae)
ENSMUSG00000085278	-0.116332	0.0769074	-0.31458	Gm12841	predicted gene 12841
ENSMUSG00000039349	-0.197107	-0.0902674	-0.314159	C130074G19Rik	RIKEN cDNA C130074G19 gene
ENSMUSG00000087624	0.141611	-0.00737388	-0.313673	9230111E07Rik	RIKEN cDNA 9230111E07 gene
ENSMUSG00000079478	0.0414841	0.0612175	-0.313619	Znrd2	zinc ribbon domain containing 2
ENSMUSG00000009654	-0.141668	-0.307677	-0.313609	Oit3	oncoprotein induced transcript 3
ENSMUSG00000076680	0.273168	0.1564	-0.313537	Ighv6-6	immunoglobulin heavy variable 6-6
ENSMUSG00000087107	-0.0503386	0.0616412	-0.313281	AI662270	expressed sequence AI662270
ENSMUSG00000029153	0.318621	-0.0334165	-0.312912	Ociad2	OCIA domain containing 2
ENSMUSG00000024118	-0.0919119	-0.0491375	-0.312123	Tedc2	tubulin epsilon and delta complex 2
ENSMUSG00000078485	-0.168444	0.0413317	-0.311494	Plekhn1	pleckstrin homology domain containing, family N member 1
ENSMUSG00000043673	0.0970854	0.0258566	-0.310508	Kcns3	potassium voltage-gated channel, delayed-rectifier, subfamily S, member 3
ENSMUSG00000021268	-0.146511	0.0602888	-0.309664	Meg3	maternally expressed 3
ENSMUSG00000087532	-0.105214	-0.286592	-0.308864	Gm15938	predicted gene 15938
ENSMUSG00000097140	0.349692	-0.166015	-0.308864	Gm26779	predicted gene, 26779
ENSMUSG00000091373	-0.0117787	-0.389507	-0.308864	Gm8810	predicted gene 8810
ENSMUSG00000034452	0.316993	-0.283008	-0.308864	Slc24a1	solute carrier family 24 (sodium/potassium/calcium exchanger), member 1
ENSMUSG00000048164	-0.139573	-0.204544	-0.308714	Gm7204	predicted pseudogene 7204
ENSMUSG00000039556	0.0737356	0.0850752	-0.308686	Ppp1r3f	protein phosphatase 1, regulatory subunit 3F
ENSMUSG00000097571	-0.206705	-0.125308	-0.308665	Jpx	Jpx transcript, Xist activator (non-protein coding)
ENSMUSG00000040097	-0.109036	0.0571123	-0.307925	Flywch1	FLYWCH-type zinc finger 1
ENSMUSG00000041351	-0.0228828	-0.0432001	-0.307847	Rap1gap	Rap1 GTPase-activating protein
ENSMUSG00000049130	0.257261	-0.00887882	-0.307083	C5ar1	complement component 5a receptor 1
ENSMUSG00000081373	-0.147393	-0.2	-0.306499	Gm16436	predicted gene 16436
ENSMUSG00000091825	-0.00316499	-0.247619	-0.305998	Gm5778	predicted gene 5778
ENSMUSG00000021257	-0.142211	-0.0568915	-0.305887	Angel1	angel homolog 1
ENSMUSG00000081372	-0.325121	-0.244478	-0.30528	Gm16171	predicted gene 16171
ENSMUSG00000038695	0.108045	-0.223032	-0.304569	Josd2	Josephin domain containing 2
ENSMUSG00000028435	0.207235	-0.292421	-0.304024	Aqp3	aquaporin 3
ENSMUSG00000033022	-0.260971	-0.0913948	-0.302915	Cdo1	cysteine dioxygenase 1, cytosolic
ENSMUSG00000033192	-0.152161	0.0610085	-0.302831	Lpcat2	lysophosphatidylcholine acyltransferase 2
ENSMUSG00000043372	0.195513	0.178776	-0.302789	Hexim2	hexamethylene bis-acetamide inducible 2
ENSMUSG00000028568	-0.129446	0.0146619	-0.302617	Btf3l4	basic transcription factor 3-like 4
ENSMUSG00000091563	0.346643	-0.0498024	-0.30238	Gm8108	predicted gene 8108
ENSMUSG00000076481	-0.0947862	-0.244478	-0.301799	Trbv30	T cell receptor beta, variable 30
ENSMUSG00000097357	0.403798	0.000770465	-0.301682	Gm16793	predicted gene, 16793
ENSMUSG00000002233	-0.120908	0.0381427	-0.301625	Rhoc	ras homolog family member C
ENSMUSG00000003068	-0.133782	0.0312738	-0.300729	Stk11	serine/threonine kinase 11
ENSMUSG00000006576	-0.138009	-0.156223	-0.300488	Slc4a3	solute carrier family 4 (anion exchanger), member 3
ENSMUSG00000084178	-0.0236822	-0.419372	-0.299985	Gm11759	predicted gene 11759
ENSMUSG00000029022	-0.121399	0.00848647	-0.298933	Miip	migration and invasion inhibitory protein
ENSMUSG00000018287	-0.0645431	0.06895	-0.298873	Spag7	sperm associated antigen 7
ENSMUSG00000021087	-0.0851324	-0.0339839	-0.298501	Rtn1	reticulon 1
ENSMUSG00000022474	-0.0138242	-0.169098	-0.298452	Pmm1	phosphomannomutase 1
ENSMUSG00000050947	-0.00643103	0.0870446	-0.297975	Amigo1	adhesion molecule with Ig like domain 1
ENSMUSG00000043445	-0.124001	0.068917	-0.297468	Pgp	phosphoglycolate phosphatase
ENSMUSG00000071711	0.206128	0.023362	-0.29737	Mpst	mercaptopyruvate sulfurtransferase
ENSMUSG00000021967	0.0294869	0.101062	-0.297166	Mrpl57	mitochondrial ribosomal protein L57
ENSMUSG00000024787	-0.0259008	-0.0764076	-0.29707	Snx15	sorting nexin 15
ENSMUSG00000045730	-0.017112	0.00759574	-0.296898	Adrb2	adrenergic receptor, beta 2
ENSMUSG00000030034	0.0279031	0.0397618	-0.296846	Ino80b	INO80 complex subunit B
ENSMUSG00000030083	-0.0274676	0.0496376	-0.296277	Abtb1	ankyrin repeat and BTB (POZ) domain containing 1
ENSMUSG00000020440	0.16728	0.0147996	-0.29583	Arf5	ADP-ribosylation factor 5
ENSMUSG00000082491	-0.0230604	-0.251004	-0.295751	Gm5909	predicted gene 5909
ENSMUSG00000099137	0.0238746	0.113854	-0.295247	Gm10603	predicted gene 10603
ENSMUSG00000033096	-0.0098579	0.0815691	-0.295182	Apmap	adipocyte plasma membrane associated protein
ENSMUSG00000097403	0.161443	-0.138376	-0.294786	9230116N13Rik	RIKEN cDNA 9230116N13 gene
ENSMUSG00000081528	-0.113293	-0.0444785	-0.294786	Gm12924	predicted gene 12924
ENSMUSG00000049760	-0.0389393	0.0858383	-0.294756	Micos13	mitochondrial contact site and cristae organizing system subunit 13
ENSMUSG00000026080	-0.280281	-0.163057	-0.294694	Chst10	carbohydrate sulfotransferase 10
ENSMUSG00000023467	0.0881393	0.0915025	-0.29445	Tulp2	tubby-like protein 2
ENSMUSG00000055762	-0.000446003	0.115764	-0.293924	Eef1d	eukaryotic translation elongation factor 1 delta (guanine nucleotide exchange protein)
ENSMUSG00000035112	0.263187	-0.197365	-0.293314	Wnk4	WNK lysine deficient protein kinase 4
ENSMUSG00000025147	-0.116589	-0.00736922	-0.293242	Mob2	MOB kinase activator 2
ENSMUSG00000008140	-0.127931	0.0621198	-0.293052	Emc10	ER membrane protein complex subunit 10
ENSMUSG00000008035	0.151563	0.154972	-0.292947	Mid1ip1	Mid1 interacting protein 1 (gastrulation specific G12-like (zebrafish))
ENSMUSG00000083179	-0.111421	0.0581412	-0.292946	Gm12693	predicted gene 12693
ENSMUSG00000026209	-0.0338306	0.0900211	-0.292741	Dnpep	aspartyl aminopeptidase
ENSMUSG00000038957	-0.105694	0.0443711	-0.292631	Edc3	enhancer of mRNA decapping 3
ENSMUSG00000042050	-0.160547	-0.146748	-0.292626	Dync2i1	dynein 2 intermediate chain 1
ENSMUSG00000037814	-0.165614	0.0172217	-0.292521	No associated gene
ENSMUSG00000069136	-0.179299	-0.0480629	-0.291886	A130006I12Rik	RIKEN cDNA A130006I12 gene
ENSMUSG00000024936	0.0081284	-0.347393	-0.291886	Kcnk7	potassium channel, subfamily K, member 7
ENSMUSG00000031451	-0.1574	-0.00161075	-0.29046	Gas6	growth arrest specific 6
ENSMUSG00000093483	0.122358	0.0244678	-0.290316	AA465934	expressed sequence AA465934
ENSMUSG00000020832	-0.186111	-0.143943	-0.288637	Eral1	Era (G-protein)-like 1 (E. coli)
ENSMUSG00000087013	-0.0463706	-0.0192769	-0.288542	2610027K06Rik	RIKEN cDNA 2610027K06 gene
ENSMUSG00000025902	-0.245435	-0.157741	-0.287969	Sox17	SRY (sex determining region Y)-box 17
ENSMUSG00000038722	-0.101483	0.0375325	-0.287846	Bud31	BUD31 homolog
ENSMUSG00000001383	-0.101057	0.0221213	-0.287425	Zmat2	zinc finger, matrin type 2
ENSMUSG00000032316	-0.108452	0.0474877	-0.287124	Clk3	CDC-like kinase 3
ENSMUSG00000037894	-0.0394523	0.0923765	-0.286942	H2az1	H2A.Z variant histone 1
ENSMUSG00000040495	0.072514	-0.366015	-0.286592	Chrm4	cholinergic receptor, muscarinic 4
ENSMUSG00000022773	0.0453912	-0.0853421	-0.286382	Ypel1	yippee like 1
ENSMUSG00000039196	-0.0388174	-0.192576	-0.285907	Orm1	orosomucoid 1
ENSMUSG00000001062	-0.148156	0.0539323	-0.285803	Vps9d1	VPS9 domain containing 1
ENSMUSG00000062785	-0.356406	-0.174374	-0.285739	Kcnc3	potassium voltage gated channel, Shaw-related subfamily, member 3
ENSMUSG00000029463	-0.191301	-0.0192637	-0.285549	Fam216a	family with sequence similarity 216, member A
ENSMUSG00000032719	0.245302	0.0177282	-0.285402	Sbspon	somatomedin B and thrombospondin, type 1 domain containing
ENSMUSG00000073236	0.0158779	-0.159474	-0.28539	2500004C02Rik	RIKEN cDNA 2500004C02 gene
ENSMUSG00000001119	-0.024132	-0.0139164	-0.285319	Col6a1	collagen, type VI, alpha 1
ENSMUSG00000071714	0.000820676	0.118522	-0.284913	Csf2rb2	colony stimulating factor 2 receptor, beta 2, low-affinity (granulocyte-macrophage)
ENSMUSG00000048481	-0.168793	-0.0641474	-0.284871	Mypop	Myb-related transcription factor, partner of profilin
ENSMUSG00000051510	-0.164497	-0.0240956	-0.284566	Mafg	v-maf musculoaponeurotic fibrosarcoma oncogene family, protein G (avian)
ENSMUSG00000089764	0.0563537	0.0343537	-0.284384	Gm16580	predicted gene 16580
ENSMUSG00000019789	-0.13095	-0.114803	-0.284254	Hey2	hairy/enhancer-of-split related with YRPW motif 2
ENSMUSG00000042675	-0.112388	0.0317767	-0.283482	Ypel3	yippee like 3
ENSMUSG00000065431	0.151402	-0.0714644	-0.283404	Mir186	microRNA 186
ENSMUSG00000088200	0.116992	-0.116992	-0.283008	No associated gene
ENSMUSG00000097761	0	-0.316993	-0.283008	4930534D22Rik	RIKEN cDNA 4930534D22 gene
ENSMUSG00000034063	0.116992	-0.4	-0.283008	4930590J08Rik	RIKEN cDNA 4930590J08 gene
ENSMUSG00000050840	0	0	-0.283008	Cdh20	cadherin 20
ENSMUSG00000086308	-0.033985	0	-0.283008	G630016G05Rik	RIKEN cDNA G630016G05 gene
ENSMUSG00000083081	-0.2	-0.2	-0.283008	Gm13223	predicted gene 13223
ENSMUSG00000083910	0.433985	-0.233985	-0.283008	Gm13604	predicted gene 13604
ENSMUSG00000082653	0.249023	0.147393	-0.283008	Gm15897	predicted gene 15897
ENSMUSG00000085723	0.272514	-0.202299	-0.283008	Gm15915	predicted gene 15915
ENSMUSG00000093682	0.347393	0.0304006	-0.283008	Gm20681	predicted gene 20681
ENSMUSG00000098068	0.116992	-0.2	-0.283008	Gm7909	predicted gene 7909
ENSMUSG00000079186	-0.264386	-0.116992	-0.283008	Gzmc	granzyme C
ENSMUSG00000069300	0	0.033985	-0.283008	H2bc11	H2B clustered histone 11
ENSMUSG00000038132	-0.101629	-0.4	-0.283008	Rbm24	RNA binding motif protein 24
ENSMUSG00000029828	-0.00582927	-0.144979	-0.282606	4921507P07Rik	RIKEN cDNA 4921507P07 gene
ENSMUSG00000038240	-0.126983	0.00994478	-0.282194	Pdss2	prenyl (solanesyl) diphosphate synthase, subunit 2
ENSMUSG00000072844	0.369823	-0.238201	-0.281586	G530011O06Rikx	RIKEN cDNA G530011O06 gene x
ENSMUSG00000020415	0.098347	0.0205884	-0.281243	Pttg1	pituitary tumor-transforming gene 1
ENSMUSG00000029376	-0.275413	-0.0948076	-0.28106	Mthfd2l	methylenetetrahydrofolate dehydrogenase (NADP+ dependent) 2-like
ENSMUSG00000052825	-0.0909682	0.0603768	-0.28051	Gm9892	predicted gene 9892
ENSMUSG00000097517	0.036804	0.0236013	-0.280152	No associated gene
ENSMUSG00000024168	0.127154	0.113305	-0.28004	Tmem204	transmembrane protein 204
ENSMUSG00000078572	0.0419293	0.0109098	-0.279891	Ndufaf8	NADH:ubiquinone oxidoreductase complex assembly factor 8
ENSMUSG00000096944	-0.0229851	0.0892392	-0.27887	No associated gene
ENSMUSG00000032802	0.161462	-0.230617	-0.278657	Srxn1	sulfiredoxin 1 homolog (S. cerevisiae)
ENSMUSG00000054342	-0.0778485	0.0439838	-0.278393	Kcnn4	potassium intermediate/small conductance calcium-activated channel, subfamily N, member 4
ENSMUSG00000034006	-0.0127354	-0.130097	-0.278353	Slc66a2	solute carrier family 66 member 2
ENSMUSG00000059970	0.152904	0.116725	-0.278195	Hspa2	heat shock protein 2
ENSMUSG00000040183	-0.113408	0.061283	-0.278009	Ankrd6	ankyrin repeat domain 6
ENSMUSG00000025499	-0.0858232	0.0335078	-0.277906	Hras	Harvey rat sarcoma virus oncogene
ENSMUSG00000051403	-0.135323	-0.016519	-0.277847	Ppp1r37	protein phosphatase 1, regulatory subunit 37
ENSMUSG00000022614	0.00212232	0.0687093	-0.277397	Lmf2	lipase maturation factor 2
ENSMUSG00000078139	-0.04084	-0.40494	-0.277312	AK157302	cDNA sequence AK157302
ENSMUSG00000034165	-0.115727	0.0676825	-0.277132	Ccnd3	cyclin D3
ENSMUSG00000078247	-0.283038	-0.124893	-0.276452	Airn	antisense Igf2r RNA
ENSMUSG00000026807	-0.0830075	0.0616245	-0.276384	Ak8	adenylate kinase 8
ENSMUSG00000089092	0.230401	0.116992	-0.276164	No associated gene
ENSMUSG00000055760	0.0341975	-0.0875384	-0.275991	Gemin6	gem nuclear organelle associated protein 6
ENSMUSG00000039461	-0.1415	0.0460128	-0.275798	Tcta	T cell leukemia translocation altered gene
ENSMUSG00000081824	-0.00836729	0.0865488	-0.275187	Ndufs5-ps	NADH:ubiquinone oxidoreductase core subunit S5, pseudogene
ENSMUSG00000031253	0.123477	-0.390586	-0.274879	Srpx2	sushi-repeat-containing protein, X-linked 2
ENSMUSG00000095419	0.145701	-0.0623482	-0.27399	Gm14328	predicted gene 14328
ENSMUSG00000001334	0.0490225	-0.0187001	-0.273887	Fndc5	fibronectin type III domain containing 5
ENSMUSG00000034201	0.0880381	0.126819	-0.273864	Gas2l1	growth arrest-specific 2 like 1
ENSMUSG00000023886	-0.0498025	-0.00995147	-0.273779	Smoc2	SPARC related modular calcium binding 2
ENSMUSG00000085581	-0.0304006	-0.181378	-0.272514	Gm12786	predicted gene 12786
ENSMUSG00000042712	-0.155081	-0.0117767	-0.271934	Tceal9	transcription elongation factor A like 9
ENSMUSG00000093996	0	-0.418622	-0.271622	Spata31f1c	spermatogenesis associated 31 subfamily F member 1C
ENSMUSG00000078746	-0.038529	-0.477713	-0.271622	Spata31f1d	spermatogenesis associated 31 subfamily F member 1D
ENSMUSG00000021631	-0.00729765	0.081524	-0.27162	Mrps36-ps1	mitichondrial ribosomal protein S36, pseudogene 1
ENSMUSG00000096586	0.296835	-0.281778	-0.27112	No associated gene
ENSMUSG00000074607	0.140602	0.0930534	-0.270812	Tox2	TOX high mobility group box family member 2
ENSMUSG00000097505	-0.19577	-0.00385725	-0.270783	No associated gene
ENSMUSG00000035642	0.108877	0.0986751	-0.270442	Aamdc	adipogenesis associated Mth938 domain containing
ENSMUSG00000049600	0.0585635	0.0692514	-0.270382	Zbtb45	zinc finger and BTB domain containing 45
ENSMUSG00000041777	-0.221287	-0.095518	-0.269925	Cir1	corepressor interacting with RBPJ, 1
ENSMUSG00000046947	-0.141289	-0.0401415	-0.269612	Adck2	aarF domain containing kinase 2
ENSMUSG00000044220	0.119373	-0.079571	-0.269596	Nkx2-3	NK2 homeobox 3
ENSMUSG00000096952	-0.171634	-0.0211713	-0.269149	No associated gene
ENSMUSG00000023170	-0.0631871	-0.0645501	-0.268622	Gps2	G protein pathway suppressor 2
ENSMUSG00000035473	-0.183387	-0.116849	-0.268383	Galm	galactose mutarotase
ENSMUSG00000034748	0.0463646	-0.0398048	-0.268382	Sirt6	sirtuin 6
ENSMUSG00000082896	-0.247579	-0.146438	-0.268299	Gm5844	predicted gene 5844
ENSMUSG00000030747	0.0140779	0.121574	-0.268067	Dgat2	diacylglycerol O-acyltransferase 2
ENSMUSG00000023993	0.132552	0.131661	-0.267831	Treml1	triggering receptor expressed on myeloid cells-like 1
ENSMUSG00000041629	-0.113549	0.0415274	-0.267809	Fam104a	family with sequence similarity 104, member A
ENSMUSG00000032691	-0.0518193	0.055805	-0.267656	Nlrp3	NLR family, pyrin domain containing 3
ENSMUSG00000040209	-0.174346	-0.0711767	-0.267179	Zfp704	zinc finger protein 704
ENSMUSG00000054967	-0.116992	-0.340909	-0.266731	Zfp647	zinc finger protein 647
ENSMUSG00000060860	0.213174	0.0115343	-0.266609	Ube2s	ubiquitin-conjugating enzyme E2S
ENSMUSG00000047613	-0.152904	0.0095717	-0.266445	A430005L14Rik	RIKEN cDNA A430005L14 gene
ENSMUSG00000041220	0.0563236	0.145458	-0.26577	Elovl6	ELOVL family member 6, elongation of long chain fatty acids (yeast)
ENSMUSG00000038745	-0.272514	-0.128893	-0.265603	Nlrp6	NLR family, pyrin domain containing 6
ENSMUSG00000000326	-0.0950405	-0.0143306	-0.2656	Comt	catechol-O-methyltransferase
ENSMUSG00000000876	-0.134935	0.0389043	-0.265503	Pxmp4	peroxisomal membrane protein 4
ENSMUSG00000098148	-0.0306103	0.0258254	-0.265236	No associated gene
ENSMUSG00000035285	-0.0849749	-0.0912313	-0.2649	Nat14	N-acetyltransferase 14
ENSMUSG00000089715	-0.167245	-0.0233943	-0.264638	Cbx6	chromobox 6
ENSMUSG00000085838	0	0	-0.264386	Chn1os1	chimerin 1, opposite strand 1
ENSMUSG00000036578	0.2	-0.347393	-0.264386	Fxyd7	FXYD domain-containing ion transport regulator 7
ENSMUSG00000080816	0.33107	0.033985	-0.264386	Gm12447	predicted gene 12447
ENSMUSG00000087571	0.166015	0	-0.264386	Gm15202	predicted gene 15202
ENSMUSG00000084154	-0.0689296	-0.0830075	-0.264386	Gm15644	predicted gene 15644
ENSMUSG00000097669	-0.116992	-0.4	-0.264386	Gm8649	predicted gene 8649
ENSMUSG00000039110	-0.135614	-0.0643856	-0.264386	Mycbpap	MYCBP associated protein
ENSMUSG00000026883	-0.0887521	0.00512827	-0.263727	Dab2ip	disabled 2 interacting protein
ENSMUSG00000021662	-0.141275	-0.160094	-0.263256	Arhgef28	Rho guanine nucleotide exchange factor (GEF) 28
ENSMUSG00000086514	-0.278602	-0.0985159	-0.263005	Gm11747	predicted gene 11747
ENSMUSG00000024096	-0.110351	0.0806918	-0.262875	Ralbp1	ralA binding protein 1
ENSMUSG00000097249	0.302776	0.165194	-0.262258	No associated gene
ENSMUSG00000024665	-0.105691	0.0834448	-0.261934	Fads2	fatty acid desaturase 2
ENSMUSG00000046432	-0.148737	-0.0972404	-0.261886	Bex3	brain expressed X-linked 3
ENSMUSG00000052605	-0.175334	-0.121446	-0.261792	Isoc2b	isochorismatase domain containing 2b
ENSMUSG00000026211	-0.102094	0.0795754	-0.261468	Obsl1	obscurin-like 1
ENSMUSG00000025665	0.150811	-0.23258	-0.261456	Rps6ka6	ribosomal protein S6 kinase polypeptide 6
ENSMUSG00000062470	0.32908	-0.0323198	-0.260122	Fbxl12os	F-box and leucine-rich repeat protein 12, opposite strand
ENSMUSG00000040040	-0.129008	-0.172045	-0.259706	Ift88	intraflagellar transport 88
ENSMUSG00000020787	0.129314	0.134691	-0.259604	P2rx1	purinergic receptor P2X, ligand-gated ion channel, 1
ENSMUSG00000086593	0.147518	0.087495	-0.259396	Gm16548	predicted gene 16548
ENSMUSG00000027327	0.0766228	-0.081483	-0.259321	Adissp	adipose secreted signaling protein
ENSMUSG00000031158	0.0132888	0.0688566	-0.259307	Timm17b	translocase of inner mitochondrial membrane 17b
ENSMUSG00000055926	-0.105964	0.0437281	-0.259117	Gm14137	predicted gene 14137
ENSMUSG00000081999	0.019624	0.0999424	-0.258923	Gm13461	predicted gene 13461
ENSMUSG00000059602	-0.125125	0.0056372	-0.258767	Syn3	synapsin III
ENSMUSG00000089682	-0.101401	0.084483	-0.258657	Bcl2l2	BCL2-like 2
ENSMUSG00000038721	0.159591	-0.248459	-0.258556	Hoxb7	homeobox B7
ENSMUSG00000009545	-0.180093	-0.246657	-0.258436	Kcnq1	potassium voltage-gated channel, subfamily Q, member 1
ENSMUSG00000027223	-0.0406095	-0.364001	-0.258335	Mapk8ip1	mitogen-activated protein kinase 8 interacting protein 1
ENSMUSG00000092267	-0.121403	0.0651238	-0.258293	No associated gene
ENSMUSG00000020607	0.105061	-0.040386	-0.258208	Lratd1	LRAT domain containing 1
ENSMUSG00000079003	-0.0392805	-0.10157	-0.258205	Samd1	sterile alpha motif domain containing 1
ENSMUSG00000026630	0.039731	0.0971436	-0.257497	Batf3	basic leucine zipper transcription factor, ATF-like 3
ENSMUSG00000052942	-0.0930993	-0.180047	-0.257301	Glis3	GLIS family zinc finger 3
ENSMUSG00000075265	-0.153093	-0.0799437	-0.256664	Tnk2os	tyrosine kinase, non-receptor 2, opposite strand
ENSMUSG00000023072	0.157219	0.0662392	-0.256262	Cep89	centrosomal protein 89
ENSMUSG00000068859	-0.179291	-0.127982	-0.256202	Sp9	trans-acting transcription factor 9
ENSMUSG00000094066	0.0140779	-0.446123	-0.256022	Spata31f1b	spermatogenesis associated 31 subfamily F member 1B
ENSMUSG00000094023	-0.237569	-0.159104	-0.255795	Trav7d-4	T cell receptor alpha variable 7D-4
ENSMUSG00000000555	-0.00586437	0.0946403	-0.255394	Itga5	integrin alpha 5 (fibronectin receptor alpha)
ENSMUSG00000023330	0.00561153	-0.02294	-0.255142	Dtwd1	DTW domain containing 1
ENSMUSG00000036241	0.0494333	0.0734971	-0.254782	Ube2r2	ubiquitin-conjugating enzyme E2R 2
ENSMUSG00000026921	-0.102352	0.0866477	-0.253829	Egfl7	EGF-like domain 7
ENSMUSG00000027203	-0.0843959	0.0337949	-0.253765	Dut	deoxyuridine triphosphatase
ENSMUSG00000045140	-0.179387	-0.0338275	-0.253717	Pigw	phosphatidylinositol glycan anchor biosynthesis, class W
ENSMUSG00000024997	-0.0789454	-0.0268421	-0.253436	Prdx3	peroxiredoxin 3
ENSMUSG00000061559	-0.1216	-0.0237418	-0.253285	Skic8	SKI8 subunit of superkiller complex
ENSMUSG00000025650	-0.130145	-0.00479621	-0.252648	Col7a1	collagen, type VII, alpha 1
ENSMUSG00000095440	-0.0373515	-0.171906	-0.25264	Fignl2	fidgetin-like 2
ENSMUSG00000097619	-0.13107	-0.10357	-0.252607	4833422M21Rik	RIKEN cDNA 4833422M21 gene
ENSMUSG00000034872	-0.193516	-0.140088	-0.252607	Gipc3	GIPC PDZ domain containing family, member 3
ENSMUSG00000096574	0.00212945	0.0631004	-0.252607	Gm2956	predicted gene 2956
ENSMUSG00000057370	0.0643856	0.147393	-0.252607	Gm8724	predicted pseudogene 8724
ENSMUSG00000047394	0.0526069	0.0643856	-0.252607	Odf3b	outer dense fiber of sperm tails 3B
ENSMUSG00000038605	-0.050336	0.0873508	-0.251991	Samd10	sterile alpha motif domain containing 10
ENSMUSG00000045752	-0.100487	0.0751947	-0.251923	Tssc4	tumor-suppressing subchromosomal transferable fragment 4
ENSMUSG00000021023	-0.145324	0.0458952	-0.25184	Prorp	protein only RNase P catalytic subunit
ENSMUSG00000030717	-0.114236	0.0317568	-0.251783	Nupr1	nuclear protein transcription regulator 1
ENSMUSG00000033618	-0.0251062	0.0699403	-0.251774	Map3k13	mitogen-activated protein kinase kinase kinase 13
ENSMUSG00000032353	-0.0223245	0.112188	-0.251726	Tmed3	transmembrane p24 trafficking protein 3
ENSMUSG00000026568	0.0103193	0.131798	-0.251581	Mpc2	mitochondrial pyruvate carrier 2
ENSMUSG00000029440	-0.105801	0.0333158	-0.251074	Psmd9	proteasome (prosome, macropain) 26S subunit, non-ATPase, 9
ENSMUSG00000097857	0.308864	0.0186219	-0.250308	No associated gene
ENSMUSG00000031584	-0.00599764	0.111116	-0.250222	Gsr	glutathione reductase
ENSMUSG00000089875	-0.0875799	0.0382027	-0.250155	Etohd2	ethanol decreased 2
ENSMUSG00000078201	-0.0514908	-0.0507338	-0.249834	Tmem203	transmembrane protein 203
ENSMUSG00000089886	0.250963	-0.102915	-0.249833	Gm16184	predicted gene 16184
ENSMUSG00000001120	-0.286949	-0.178764	-0.249764	Pcbp3	poly(rC) binding protein 3
ENSMUSG00000051041	-0.275989	-0.1316	-0.249762	Olfml1	olfactomedin-like 1
ENSMUSG00000025858	-0.0280529	0.092423	-0.249756	Get4	golgi to ER traffic protein 4
ENSMUSG00000050503	0.102714	0.013621	-0.249701	Fbxl22	F-box and leucine-rich repeat protein 22
ENSMUSG00000026768	0.0590156	-0.408657	-0.24914	Itga8	integrin alpha 8
ENSMUSG00000015467	-0.123714	-0.0246202	-0.249062	Egfl8	EGF-like domain 8
ENSMUSG00000037017	-0.0145876	0.114484	-0.248673	Zscan21	zinc finger and SCAN domain containing 21
ENSMUSG00000060214	0.00548827	0.0837347	-0.24843	No associated gene
ENSMUSG00000017737	0.0414232	0.120377	-0.248246	Mmp9	matrix metallopeptidase 9
ENSMUSG00000091586	0.0333721	0.07584	-0.24824	Cyp4f17	cytochrome P450, family 4, subfamily f, polypeptide 17
ENSMUSG00000033124	0.0346682	0.12246	-0.248155	Atg9a	autophagy related 9A
ENSMUSG00000038570	-0.0304006	0.0830075	-0.248063	Saxo2	stabilizer of axonemal microtubules 2
ENSMUSG00000083307	-0.202929	-0.163837	-0.247848	AA414768	expressed sequence AA414768
ENSMUSG00000022311	0.0148067	0.0593286	-0.247795	Csmd3	CUB and Sushi multiple domains 3
ENSMUSG00000032366	-0.0677451	0.0507991	-0.247679	Tpm1	tropomyosin 1, alpha
ENSMUSG00000062794	0.0330929	0.05147	-0.247648	Zfp599	zinc finger protein 599
ENSMUSG00000087233	-0.114721	-0.154698	-0.247547	Gm43213	predicted gene 43213
ENSMUSG00000024011	-0.0653123	-0.054009	-0.246809	Pi16	peptidase inhibitor 16
ENSMUSG00000024937	0.0457782	0.0900994	-0.246538	Ehbp1l1	EH domain binding protein 1-like 1
ENSMUSG00000025959	-0.117389	0.0571884	-0.246369	Klf7	Kruppel-like transcription factor 7 (ubiquitous)
ENSMUSG00000002679	-0.126741	0.06167	-0.246161	Med6	mediator complex subunit 6
ENSMUSG00000076961	-0.0526069	-0.072514	-0.245764	No associated gene
ENSMUSG00000093459	0.0528925	-0.164004	-0.245489	No associated gene
ENSMUSG00000086582	0.0728335	0.0726865	-0.245095	Gm16272	predicted gene 16272
ENSMUSG00000091780	-0.0485501	0.00198073	-0.244995	Sco2	SCO2 cytochrome c oxidase assembly protein
ENSMUSG00000092454	-0.021696	0.0402724	-0.244822	Gm2991	predicted pseudogene 2991
ENSMUSG00000030708	0.0489038	-0.125215	-0.244683	Dnajb13	DnaJ heat shock protein family (Hsp40) member B13
ENSMUSG00000006651	0.110772	0.0165406	-0.2446	Aplp1	amyloid beta (A4) precursor-like protein 1
ENSMUSG00000088993	0.233985	-0.166015	-0.244478	No associated gene
ENSMUSG00000029378	0	-0.0830075	-0.244478	Areg	amphiregulin
ENSMUSG00000038214	-0.0719284	0.0891242	-0.244228	Bend3	BEN domain containing 3
ENSMUSG00000096938	-0.0923199	-0.0187644	-0.24417	9530052E02Rik	RIKEN cDNA 9530052E02 gene
ENSMUSG00000032547	-0.251607	-0.165525	-0.244124	Ryk	receptor-like tyrosine kinase
ENSMUSG00000025855	-0.0351796	-0.0922245	-0.244056	Prkar1b	protein kinase, cAMP dependent regulatory, type I beta
ENSMUSG00000034471	-0.0673173	0.0838438	-0.243567	Caskin2	CASK-interacting protein 2
ENSMUSG00000029797	-0.191589	-0.0476548	-0.243425	Sspo	SCO-spondin
ENSMUSG00000080486	-0.2029	-0.224312	-0.243399	No associated gene
ENSMUSG00000039452	0.0281119	0.139019	-0.243387	Snx22	sorting nexin 22
ENSMUSG00000019214	0.175313	0.0529574	-0.242916	Chtf18	CTF18, chromosome transmission fidelity factor 18
ENSMUSG00000026826	-0.169111	-0.0657116	-0.242701	Nr4a2	nuclear receptor subfamily 4, group A, member 2
ENSMUSG00000038146	-0.0308591	0.0275307	-0.242659	Notch3	notch 3
ENSMUSG00000097236	-0.124382	0.0134162	-0.241945	No associated gene
ENSMUSG00000060992	-0.123866	0.0574449	-0.241775	Copz1	coatomer protein complex, subunit zeta 1
ENSMUSG00000035279	0.202951	0.0767472	-0.241384	Ssc5d	scavenger receptor cysteine rich family, 5 domains
ENSMUSG00000023191	0.000678724	-0.106705	-0.241221	P3h3	prolyl 3-hydroxylase 3
ENSMUSG00000003438	0.0166611	0.136027	-0.241181	Timm50	translocase of inner mitochondrial membrane 50
ENSMUSG00000026202	0.116186	-0.0132175	-0.24064	Tuba4a	tubulin, alpha 4A
ENSMUSG00000079429	0.0467792	0.113401	-0.240573	Mroh2a	maestro heat-like repeat family member 2A
ENSMUSG00000054428	0.110067	-0.316027	-0.240084	Atpif1	ATPase inhibitory factor 1
ENSMUSG00000081534	0.0382472	-0.0390349	-0.239936	Slc48a1	solute carrier family 48 (heme transporter), member 1
ENSMUSG00000022768	-0.115195	-0.103439	-0.239638	Ccdc116	coiled-coil domain containing 116
ENSMUSG00000021217	-0.271142	-0.123461	-0.239504	Tshz3	teashirt zinc finger family member 3
ENSMUSG00000024869	-0.154476	-0.0177336	-0.239503	Gm49405	predicted gene, 49405
ENSMUSG00000089669	-0.115419	-0.09131	-0.238794	Tnfsf13	tumor necrosis factor (ligand) superfamily, member 13
ENSMUSG00000070532	-0.147393	-0.0245713	-0.238529	Ccdc190	coiled-coil domain containing 190
ENSMUSG00000073758	0.0610586	-0.331305	-0.238529	Sh3d21	SH3 domain containing 21
ENSMUSG00000026201	-0.0130485	0.104278	-0.238429	Stk16	serine/threonine kinase 16
ENSMUSG00000048445	0.314982	-0.197443	-0.238152	Ccdc57	coiled-coil domain containing 57
ENSMUSG00000040548	-0.0744377	0.0372187	-0.238045	Tex2	testis expressed gene 2
ENSMUSG00000028333	-0.106862	-0.0957024	-0.237995	Anp32b	acidic (leucine-rich) nuclear phosphoprotein 32 family, member B
ENSMUSG00000023988	-0.0369544	0.0497297	-0.237647	Bysl	bystin-like
ENSMUSG00000081176	-0.158114	0.0126816	-0.237256	H3f3a-ps2	H3.3 histone A, pseudogene 2
ENSMUSG00000043251	-0.00186953	0.0826369	-0.237084	Exoc3l	exocyst complex component 3-like
ENSMUSG00000087352	-0.00450096	-0.296945	-0.236898	Gm12999	predicted gene 12999
ENSMUSG00000035781	-0.0878203	0.0422068	-0.236474	R3hdm4	R3H domain containing 4
ENSMUSG00000038412	-0.067875	0.0585555	-0.23636	Higd1a	HIG1 domain family, member 1A
ENSMUSG00000097749	0.126665	0.1398	-0.236258	Gm16938	predicted gene, 16938
ENSMUSG00000030122	-0.0649874	0.0539491	-0.235848	Ptms	parathymosin
ENSMUSG00000042549	0.105214	0.0924212	-0.235629	Map2k3os	mitogen-activated protein kinase kinase 3, opposite strand
ENSMUSG00000078794	0.0551494	-0.0625504	-0.235378	Dact3	dishevelled-binding antagonist of beta-catenin 3
ENSMUSG00000052534	-0.0744569	-0.0163189	-0.235266	Pbx1	pre B cell leukemia homeobox 1
ENSMUSG00000026383	-0.145683	0.0342237	-0.235114	Epb41l5	erythrocyte membrane protein band 4.1 like 5
ENSMUSG00000041117	-0.140406	0.00516394	-0.234251	Ccdc8	coiled-coil domain containing 8
ENSMUSG00000032060	0.00422516	0.0199721	-0.234184	Cryab	crystallin, alpha B
ENSMUSG00000095087	-0.0830075	-0.06797	-0.233985	No associated gene
ENSMUSG00000074971	0.102915	-0.0970854	-0.233985	Fibin	fin bud initiation factor homolog (zebrafish)
ENSMUSG00000074508	0.0830075	-0.116992	-0.233985	Gm10706	predicted gene 10706
ENSMUSG00000085245	0	0.0643856	-0.233985	Gm11713	predicted gene 11713
ENSMUSG00000094271	0.302915	0	-0.233985	Gm13290	predicted gene 13290
ENSMUSG00000098210	0.233985	0	-0.233985	Gm5224	predicted pseudogene 5224
ENSMUSG00000091800	-0.252607	-0.0830075	-0.233985	Igkv1-115	immunoglobulin kappa variable 1-115
ENSMUSG00000076065	0	-0.2	-0.233985	Mir681	microRNA 681
ENSMUSG00000041708	0.0954413	-0.4	-0.233985	Mpped1	metallophosphoesterase domain containing 1
ENSMUSG00000024184	0.2	-0.189507	-0.233985	Pdia2	protein disulfide isomerase associated 2
ENSMUSG00000090095	0.283008	0.147393	-0.233985	Rpl29-ps1	ribosomal protein L29, pseudogene 1
ENSMUSG00000021241	-0.0761095	0.0759839	-0.233789	Isca2	iron-sulfur cluster assembly 2
ENSMUSG00000028439	-0.109389	0.0750503	-0.233504	Fam219a	family with sequence similarity 219, member A
ENSMUSG00000040124	0.00822455	0.070152	-0.233226	Gorab	golgin, RAB6-interacting
ENSMUSG00000067424	-0.0640163	0.0299558	-0.232891	Zfp563	zinc finger protein 563
ENSMUSG00000095210	0.228908	-0.0364484	-0.232845	Ighv5-9-1	immunoglobulin heavy variable 5-9-1
ENSMUSG00000045160	-0.126468	0.00994164	-0.232829	Bola3	bolA-like 3 (E. coli)
ENSMUSG00000064916	0.225857	-0.316337	-0.2327	Gm22573	predicted gene, 22573
ENSMUSG00000051528	-0.0830075	-0.4	-0.2327	Or6k4	olfactory receptor family 6 subfamily K member 4
ENSMUSG00000033697	0.00622676	-0.0290479	-0.232525	Arhgap39	Rho GTPase activating protein 39
ENSMUSG00000028779	-0.0780745	0.0643962	-0.232446	Pef1	penta-EF hand domain containing 1
ENSMUSG00000024354	-0.0839474	0.0879603	-0.232414	Slc23a1	solute carrier family 23 (nucleobase transporters), member 1
ENSMUSG00000089701	0.0818384	0.00611858	-0.232361	Gm15978	predicted gene 15978
ENSMUSG00000036181	0.040594	-0.02991	-0.231761	H1f2	H1.2 linker histone, cluster member
ENSMUSG00000020898	-0.10628	0.02463	-0.231566	Ctc1	CTS telomere maintenance complex component 1
ENSMUSG00000039529	-0.0393119	0.002796	-0.231376	Atp8b1	ATPase, class I, type 8B, member 1
ENSMUSG00000090555	0.212462	0.0905677	-0.23097	Gm8893	predicted gene 8893
ENSMUSG00000028145	0.0106668	-0.200814	-0.230809	Them4	thioesterase superfamily member 4
ENSMUSG00000082387	0.2	-0.316993	-0.230401	No associated gene
ENSMUSG00000093672	-0.0526069	-0.230401	-0.230401	Gm20655	predicted gene 20655
ENSMUSG00000081295	0.116992	-0.116992	-0.230401	Gm6275	predicted gene 6275
ENSMUSG00000059991	-0.121537	-0.335614	-0.230401	Nptx2	neuronal pentraxin 2
ENSMUSG00000031637	-0.163115	-0.277405	-0.229973	Lrp2bp	Lrp2 binding protein
ENSMUSG00000022836	-0.125455	0.0539905	-0.229589	Mylk	myosin, light polypeptide kinase
ENSMUSG00000035183	-0.101822	0.00814759	-0.229553	Slc24a5	solute carrier family 24, member 5
ENSMUSG00000042903	-0.162195	-0.0949862	-0.229519	Foxo4	forkhead box O4
ENSMUSG00000085711	0.0158422	-0.0003968	-0.229414	Gm15163	predicted gene 15163
ENSMUSG00000096993	-0.0253821	-0.0069188	-0.228856	Gm26787	predicted gene, 26787
ENSMUSG00000091613	0.111868	-0.22649	-0.228836	Gm17046	predicted gene 17046
ENSMUSG00000052926	-0.0976937	-0.0828981	-0.2282	Rnaseh2a	ribonuclease H2, large subunit
ENSMUSG00000027848	0.283184	0.137602	-0.227883	Olfml3	olfactomedin-like 3
ENSMUSG00000004044	-0.120556	-0.031676	-0.227651	Cavin1	caveolae associated 1
ENSMUSG00000030219	-0.163023	-0.225962	-0.227593	Erp27	endoplasmic reticulum protein 27
ENSMUSG00000037827	-0.0420769	0.0442135	-0.22756	Gm5884	predicted pseudogene 5884
ENSMUSG00000086836	0.0629097	-0.0526069	-0.227501	Gm13748	predicted gene 13748
ENSMUSG00000090157	-0.0377378	0.101841	-0.227426	Gm16534	predicted gene 16534
ENSMUSG00000002012	-0.279117	-0.16285	-0.227212	Pnck	pregnancy upregulated non-ubiquitously expressed CaM kinase
ENSMUSG00000069309	0.0748791	0.0865919	-0.226966	H2ac22	H2A clustered histone 22
ENSMUSG00000074570	0.0907787	-0.0563442	-0.226456	Cass4	Cas scaffolding protein family member 4
ENSMUSG00000018659	0.292924	-0.318487	-0.226309	Pnpo	pyridoxine 5'-phosphate oxidase
ENSMUSG00000062081	-0.00382512	0.0148247	-0.226176	Gm6055	predicted gene 6055
ENSMUSG00000054083	-0.0176358	-0.00184556	-0.226153	Capn12	calpain 12
ENSMUSG00000082284	0.179928	0.0578925	-0.226126	H3f3a-ps1	H3.3 histone A, pseudogene 1
ENSMUSG00000042770	-0.128297	-0.0263198	-0.2261	Hebp1	heme binding protein 1
ENSMUSG00000003546	-0.139109	-0.0246678	-0.226094	Klc4	kinesin light chain 4
ENSMUSG00000047881	-0.0400773	-0.0591098	-0.225839	Rell1	RELT-like 1
ENSMUSG00000004631	-0.055967	0.0486293	-0.225711	Sgce	sarcoglycan, epsilon
ENSMUSG00000085376	-0.243321	-0.188972	-0.225642	Gm14508	predicted gene 14508
ENSMUSG00000056665	-0.00767827	0.117101	-0.225595	Them6	thioesterase superfamily member 6
ENSMUSG00000086083	-0.157177	-0.106686	-0.225188	Gm15829	predicted gene 15829
ENSMUSG00000084979	-0.149692	-0.208815	-0.225136	Gm16267	predicted gene 16267
ENSMUSG00000073000	-0.316337	-0.16655	-0.225106	Ppp1r36dn	Ppp1r36 downstream neighbor
ENSMUSG00000002486	-0.100316	0.0492618	-0.225083	Tchp	trichoplein, keratin filament binding
ENSMUSG00000040498	-0.173119	-0.208977	-0.224466	Igsf23	immunoglobulin superfamily, member 23
ENSMUSG00000018932	0.0320517	0.0197603	-0.223863	Map2k3	mitogen-activated protein kinase kinase 3
ENSMUSG00000029102	0.127486	0.147393	-0.223557	Hgfac	hepatocyte growth factor activator
ENSMUSG00000061751	0.0612388	0.11749	-0.223528	Kalrn	kalirin, RhoGEF kinase
ENSMUSG00000025934	0.107351	-0.0430729	-0.22338	Gsta3	glutathione S-transferase, alpha 3
ENSMUSG00000030801	-0.0675003	0.0653707	-0.223283	Kat8	K(lysine) acetyltransferase 8
ENSMUSG00000079557	0.0708722	-0.25846	-0.222882	Marchf2	membrane associated ring-CH-type finger 2
ENSMUSG00000026489	-0.180066	-0.0416789	-0.222707	Coq8a	coenzyme Q8A
ENSMUSG00000062044	0.0865919	0.0150375	-0.222668	Lmtk3	lemur tyrosine kinase 3
ENSMUSG00000061479	-0.0235126	0.119842	-0.221706	Snrpa	small nuclear ribonucleoprotein polypeptide A
ENSMUSG00000002020	-0.103592	-0.115539	-0.221486	Ltbp2	latent transforming growth factor beta binding protein 2
ENSMUSG00000035829	0.165945	-0.109379	-0.221334	Ppp1r26	protein phosphatase 1, regulatory subunit 26
ENSMUSG00000000325	-0.19958	-0.080825	-0.221113	No associated gene
ENSMUSG00000042804	-0.00901544	-0.107148	-0.221039	Gpr153	G protein-coupled receptor 153
ENSMUSG00000074682	-0.0646088	-0.0410341	-0.220825	Zcchc3	zinc finger, CCHC domain containing 3
ENSMUSG00000039515	-0.0268833	0.0991179	-0.220755	Ptpa	protein phosphatase 2 protein activator
ENSMUSG00000004897	-0.162172	-0.033005	-0.220105	Hdgf	heparin binding growth factor
ENSMUSG00000043592	0.257763	0.13891	-0.219812	Unc5cl	unc-5 family C-terminal like
ENSMUSG00000004018	-0.0954831	0.0691936	-0.219559	Fancl	Fanconi anemia, complementation group L
ENSMUSG00000032332	0.0269173	-0.0540534	-0.219405	Col12a1	collagen, type XII, alpha 1
ENSMUSG00000065904	-0.2	-0.288957	-0.219372	Gm26109	predicted gene, 26109
ENSMUSG00000029166	-0.00829441	0.102508	-0.219144	Mapre3	microtubule-associated protein, RP/EB family, member 3
ENSMUSG00000014633	0.0474074	0.135639	-0.218964	Cmc2	COX assembly mitochondrial protein 2
ENSMUSG00000027217	-0.0660108	0.0234157	-0.218682	Tspan18	tetraspanin 18
ENSMUSG00000033540	-0.0561582	0.04653	-0.218479	Idua	iduronidase, alpha-L
ENSMUSG00000042485	-0.0571713	0.0670868	-0.217938	Mustn1	musculoskeletal, embryonic nuclear protein 1
ENSMUSG00000016024	0.0926999	-0.0791385	-0.217772	Lbp	lipopolysaccharide binding protein
ENSMUSG00000051427	0.0562522	-0.025287	-0.217681	Ccdc157	coiled-coil domain containing 157
ENSMUSG00000042642	-6.61e-05	0.106212	-0.216939	Flad1	flavin adenine dinucleotide synthetase 1
ENSMUSG00000007721	-0.0743891	0.0725693	-0.216876	Ccdc124	coiled-coil domain containing 124
ENSMUSG00000017493	-0.101864	0.0178408	-0.216548	Igfbp4	insulin-like growth factor binding protein 4
ENSMUSG00000064043	-0.0406814	0.0552157	-0.215874	Trerf1	transcriptional regulating factor 1
ENSMUSG00000048402	0.165181	-0.00447356	-0.21579	Gli2	GLI-Kruppel family member GLI2
ENSMUSG00000089835	-0.118572	-0.012152	-0.21516	Gm7097	predicted gene 7097
ENSMUSG00000004105	-0.0320594	0.0495637	-0.215153	Angptl2	angiopoietin-like 2
ENSMUSG00000030207	-0.129395	0.0109717	-0.214985	Fam234b	family with sequence similarity 234, member B
ENSMUSG00000021215	-0.186301	-0.0180671	-0.214731	Net1	neuroepithelial cell transforming gene 1
ENSMUSG00000021493	-0.0480506	0.107587	-0.214216	Pdlim7	PDZ and LIM domain 7
ENSMUSG00000024190	-0.0922078	-0.122215	-0.214117	Dusp1	dual specificity phosphatase 1
ENSMUSG00000076496	0.0585564	0.0748791	-0.214078	Trbj2-5	T cell receptor beta joining 2-5
ENSMUSG00000087187	0.313896	-0.123836	-0.213494	Gm13431	predicted gene 13431
ENSMUSG00000024940	-0.0280883	-0.138531	-0.213444	Ltbp3	latent transforming growth factor beta binding protein 3
ENSMUSG00000025243	-0.000655026	0.0579214	-0.213255	Slc6a20b	solute carrier family 6 (neurotransmitter transporter), member 20B
ENSMUSG00000026457	0.0962068	0.0413508	-0.212563	Adipor1	adiponectin receptor 1
ENSMUSG00000039252	-0.0081284	-0.244478	-0.211779	Lgi2	leucine-rich repeat LGI family, member 2
ENSMUSG00000027796	-0.295609	-0.174143	-0.211779	Smad9	SMAD family member 9
ENSMUSG00000074922	-0.0173018	-0.00419323	-0.211688	Pabir1	PP2A A alpha (PPP2R1A) and B55A (PPP2R2A) interacting phosphatase regulator 1
ENSMUSG00000035305	-0.17858	-0.124455	-0.21166	Ror1	receptor tyrosine kinase-like orphan receptor 1
ENSMUSG00000025978	-0.22538	-0.076318	-0.21164	Rftn2	raftlin family member 2
ENSMUSG00000027314	0.0872953	-0.0274052	-0.210982	Dll4	delta like canonical Notch ligand 4
ENSMUSG00000024962	-0.0576674	0.113479	-0.210836	Vegfb	vascular endothelial growth factor B
ENSMUSG00000054708	0.325587	-0.128647	-0.210825	Ankrd24	ankyrin repeat domain 24
ENSMUSG00000020160	-0.193283	-0.105944	-0.210785	Meis1	Meis homeobox 1
ENSMUSG00000027845	-0.0835738	0.0764327	-0.210543	Dclre1b	DNA cross-link repair 1B
ENSMUSG00000075224	0.202395	-0.0139577	-0.210493	Lrrc55	leucine rich repeat containing 55
ENSMUSG00000032401	0.079676	-0.0457555	-0.210487	Lctl	lactase-like
ENSMUSG00000001802	-0.0372803	-0.0723522	-0.210171	Lrp3	low density lipoprotein receptor-related protein 3
ENSMUSG00000038005	-0.0408123	0.0425231	-0.209853	Hpf1	histone PARylation factor 1
ENSMUSG00000002210	-0.0694833	0.0845479	-0.209776	Smg9	SMG9 nonsense mediated mRNA decay factor
ENSMUSG00000026426	-0.104774	0.0609465	-0.209742	Arl8a	ADP-ribosylation factor-like 8A
ENSMUSG00000030282	0.207696	-0.121803	-0.209463	Cmas	cytidine monophospho-N-acetylneuraminic acid synthetase
ENSMUSG00000027160	0.0901837	-0.23982	-0.209278	Ccdc34	coiled-coil domain containing 34
ENSMUSG00000007659	0.33051	-0.214503	-0.209142	Bcl2l1	BCL2-like 1
ENSMUSG00000037287	0.0368954	-0.0620417	-0.209126	Tbcel	tubulin folding cofactor E-like
ENSMUSG00000010095	-0.00829489	0.0646914	-0.209021	Slc3a2	solute carrier family 3 (activators of dibasic and neutral amino acid transport), member 2
ENSMUSG00000001366	-0.0888977	-0.086455	-0.208846	Fbxo9	f-box protein 9
ENSMUSG00000025574	0.165345	-0.0571226	-0.208795	Tk1	thymidine kinase 1
ENSMUSG00000058756	-0.223773	-0.0962191	-0.208755	Thra	thyroid hormone receptor alpha
ENSMUSG00000028896	-0.0400577	0.0948741	-0.208656	Rcc1	regulator of chromosome condensation 1
ENSMUSG00000078721	0.328771	-0.208128	-0.208128	Spata31f1a	spermatogenesis associated 31 subfamily F member 1A
ENSMUSG00000033684	-0.0881763	0.0859531	-0.208115	Qsox1	quiescin Q6 sulfhydryl oxidase 1
ENSMUSG00000087026	0.080082	0.119508	-0.20799	A230103J11Rik	RIKEN cDNA A230103J11 gene
ENSMUSG00000023094	-0.0559139	0.109633	-0.207971	Msrb2	methionine sulfoxide reductase B2
ENSMUSG00000096472	0.131318	0.000826646	-0.207353	Cdkn2d	cyclin dependent kinase inhibitor 2D
ENSMUSG00000028557	-0.0396873	-0.104115	-0.207345	Rnf11	ring finger protein 11
ENSMUSG00000030086	0.253146	-0.130848	-0.207023	Chchd6	coiled-coil-helix-coiled-coil-helix domain containing 6
ENSMUSG00000033182	0.2	0.0830075	-0.206583	Kbtbd12	kelch repeat and BTB (POZ) domain containing 12
ENSMUSG00000027329	-0.0806273	0.0752273	-0.206082	Spef1	sperm flagellar 1
ENSMUSG00000029722	0.0362946	-0.105608	-0.206038	Agfg2	ArfGAP with FG repeats 2
ENSMUSG00000027187	-0.108125	0.0169551	-0.205546	Cat	catalase
ENSMUSG00000031397	-0.2631	-0.1644	-0.205294	Tktl1	transketolase-like 1
ENSMUSG00000020990	0.137594	-0.311442	-0.205157	Cdkl1	cyclin dependent kinase like 1 (CDC2 related kinase)
ENSMUSG00000030780	-0.134631	0.0116665	-0.20472	Rusf1	RUS family member 1
ENSMUSG00000034664	0.188605	0.104352	-0.204663	Itga2b	integrin alpha 2b
ENSMUSG00000045503	-0.0337783	0.0698545	-0.20454	Sys1	SYS1 Golgi-localized integral membrane protein homolog (S. cerevisiae)
ENSMUSG00000071083	0.108212	-0.125216	-0.204474	Gm10033	predicted gene 10033
ENSMUSG00000083836	0.211363	0.075421	-0.204338	Ldha-ps2	lactate dehydrogenase A, pseudogene 2
ENSMUSG00000031538	-0.131328	-0.098876	-0.204024	Plat	plasminogen activator, tissue
ENSMUSG00000018102	0.0572426	-0.0943438	-0.203401	H2bc4	H2B clustered histone 4
ENSMUSG00000038550	-0.0401597	0.0408067	-0.203225	Ciart	circadian associated repressor of transcription
ENSMUSG00000021838	0.0991113	-0.209355	-0.203191	Samd4	sterile alpha motif domain containing 4
ENSMUSG00000020175	0.282705	0.030507	-0.203133	Rab36	RAB36, member RAS oncogene family
ENSMUSG00000046245	0.0371748	0.129125	-0.202234	Pilra	paired immunoglobin-like type 2 receptor alpha
ENSMUSG00000087405	-0.142099	-0.257901	-0.201644	Gm14232	predicted gene 14232
ENSMUSG00000076655	-0.160067	-0.122081	-0.201551	Ighv4-1	immunoglobulin heavy variable 4-1
ENSMUSG00000020696	-0.0483487	0.00153892	-0.201529	Rffl	ring finger and FYVE like domain containing protein
ENSMUSG00000040997	0.119762	0.049674	-0.201435	Abhd4	abhydrolase domain containing 4
ENSMUSG00000042363	0.0186545	0.119725	-0.201181	Lgalsl	galectin like
ENSMUSG00000034917	-0.0128801	0.0443845	-0.200902	Tjp3	tight junction protein 3
ENSMUSG00000028914	-0.102544	-0.042987	-0.200893	Casp9	caspase 9
ENSMUSG00000030407	0.0847176	0.108712	-0.200775	Qpctl	glutaminyl-peptide cyclotransferase-like
ENSMUSG00000092486	-0.100782	0.00121254	-0.200356	No associated gene
ENSMUSG00000054165	0	-0.2	-0.2	No associated gene
ENSMUSG00000062501	0	-0.2	-0.2	No associated gene
ENSMUSG00000064626	0	0	-0.2	No associated gene
ENSMUSG00000064758	0	-0.2	-0.2	No associated gene
ENSMUSG00000065017	0	0	-0.2	No associated gene
ENSMUSG00000065195	0	0	-0.2	No associated gene
ENSMUSG00000065691	0.116992	0	-0.2	No associated gene
ENSMUSG00000074402	0	0	-0.2	No associated gene
ENSMUSG00000076180	0.2	-0.2	-0.2	No associated gene
ENSMUSG00000076323	0	0	-0.2	No associated gene
ENSMUSG00000077316	0	0	-0.2	No associated gene
ENSMUSG00000077830	0.2	0	-0.2	No associated gene
ENSMUSG00000078006	0	0	-0.2	No associated gene
ENSMUSG00000079284	0	0	-0.2	No associated gene
ENSMUSG00000079764	0	0	-0.2	No associated gene
ENSMUSG00000080516	0	-0.2	-0.2	No associated gene
ENSMUSG00000081123	0	0	-0.2	No associated gene
ENSMUSG00000081311	0	0	-0.2	No associated gene
ENSMUSG00000082349	0	0	-0.2	No associated gene
ENSMUSG00000084465	0.316993	-0.2	-0.2	No associated gene
ENSMUSG00000084496	0	0	-0.2	No associated gene
ENSMUSG00000084512	0	0	-0.2	No associated gene
ENSMUSG00000084613	0.2	0	-0.2	No associated gene
ENSMUSG00000085508	0	-0.316993	-0.2	No associated gene
ENSMUSG00000085529	0.2	0	-0.2	No associated gene
ENSMUSG00000086093	0	-0.2	-0.2	No associated gene
ENSMUSG00000086465	0	-0.2	-0.2	No associated gene
ENSMUSG00000087748	0	-0.2	-0.2	No associated gene
ENSMUSG00000087784	0.283008	-0.116992	-0.2	No associated gene
ENSMUSG00000087801	0	0	-0.2	No associated gene
ENSMUSG00000087846	0	0	-0.2	No associated gene
ENSMUSG00000087914	0	0	-0.2	No associated gene
ENSMUSG00000087921	0	0	-0.2	No associated gene
ENSMUSG00000088179	0.2	0	-0.2	No associated gene
ENSMUSG00000088220	0	-0.2	-0.2	No associated gene
ENSMUSG00000088334	0	0	-0.2	No associated gene
ENSMUSG00000088354	0	0	-0.2	No associated gene
ENSMUSG00000088384	0	0	-0.2	No associated gene
ENSMUSG00000088400	0	0.0526069	-0.2	No associated gene
ENSMUSG00000088453	0.2	-0.2	-0.2	No associated gene
ENSMUSG00000088527	0	0	-0.2	No associated gene
ENSMUSG00000088532	0	0	-0.2	No associated gene
ENSMUSG00000088553	0	0	-0.2	No associated gene
ENSMUSG00000088576	0	0	-0.2	No associated gene
ENSMUSG00000088736	0	0	-0.2	No associated gene
ENSMUSG00000088743	0.116992	0	-0.2	No associated gene
ENSMUSG00000088825	0	0	-0.2	No associated gene
ENSMUSG00000089050	0	0	-0.2	No associated gene
ENSMUSG00000089103	0	0	-0.2	No associated gene
ENSMUSG00000089208	0	0	-0.2	No associated gene
ENSMUSG00000089241	0	-0.316993	-0.2	No associated gene
ENSMUSG00000089447	0.2	0	-0.2	No associated gene
ENSMUSG00000089469	0	0	-0.2	No associated gene
ENSMUSG00000089545	0	-0.2	-0.2	No associated gene
ENSMUSG00000090107	0	0	-0.2	No associated gene
ENSMUSG00000090286	0	0	-0.2	No associated gene
ENSMUSG00000090828	0	0	-0.2	No associated gene
ENSMUSG00000092657	-0.2	-0.2	-0.2	No associated gene
ENSMUSG00000092719	0	0	-0.2	No associated gene
ENSMUSG00000092725	0.2	0	-0.2	No associated gene
ENSMUSG00000092979	0	0	-0.2	No associated gene
ENSMUSG00000093021	0.2	0	-0.2	No associated gene
ENSMUSG00000093029	0	0	-0.2	No associated gene
ENSMUSG00000093152	0	-0.2	-0.2	No associated gene
ENSMUSG00000093168	-0.233985	-0.116992	-0.2	No associated gene
ENSMUSG00000093300	0	0	-0.2	No associated gene
ENSMUSG00000093373	0	-0.2	-0.2	No associated gene
ENSMUSG00000093856	-0.0830075	0	-0.2	No associated gene
ENSMUSG00000094128	-0.2	-0.2	-0.2	No associated gene
ENSMUSG00000094244	0	0	-0.2	No associated gene
ENSMUSG00000094397	0	0	-0.2	No associated gene
ENSMUSG00000094400	0	0	-0.2	No associated gene
ENSMUSG00000094770	0	-0.316993	-0.2	No associated gene
ENSMUSG00000094820	0.316993	-0.2	-0.2	No associated gene
ENSMUSG00000094842	0.0830075	-0.2	-0.2	No associated gene
ENSMUSG00000095531	0.2	0	-0.2	No associated gene
ENSMUSG00000095541	0	0	-0.2	No associated gene
ENSMUSG00000095575	0	0	-0.2	No associated gene
ENSMUSG00000095731	0	-0.4	-0.2	No associated gene
ENSMUSG00000095795	0	-0.2	-0.2	No associated gene
ENSMUSG00000095798	0	0	-0.2	No associated gene
ENSMUSG00000095951	0	-0.2	-0.2	No associated gene
ENSMUSG00000096646	0	0	-0.2	No associated gene
ENSMUSG00000097338	0	0	-0.2	No associated gene
ENSMUSG00000097458	0.2	0	-0.2	No associated gene
ENSMUSG00000098477	0	0	-0.2	No associated gene
ENSMUSG00000098507	0	0	-0.2	No associated gene
ENSMUSG00000098690	0.2	0	-0.2	No associated gene
ENSMUSG00000098732	0	0	-0.2	No associated gene
ENSMUSG00000098791	0	0.116992	-0.2	No associated gene
ENSMUSG00000098803	0.2	-0.2	-0.2	No associated gene
ENSMUSG00000098827	0	-0.2	-0.2	No associated gene
ENSMUSG00000098908	0.2	-0.2	-0.2	No associated gene
ENSMUSG00000098920	0	0	-0.2	No associated gene
ENSMUSG00000098946	0	0	-0.2	No associated gene
ENSMUSG00000099119	0	0	-0.2	No associated gene
ENSMUSG00000099143	-0.2	-0.2	-0.2	No associated gene
ENSMUSG00000099316	0	0	-0.2	No associated gene
ENSMUSG00000097247	0	-0.4	-0.2	1500012K07Rik	RIKEN cDNA 1500012K07 gene
ENSMUSG00000079346	0	0	-0.2	1700013D24Rik	RIKEN cDNA 1700013D24 gene
ENSMUSG00000086348	0	-0.2	-0.2	1700017J07Rik	RIKEN cDNA 1700017J07 gene
ENSMUSG00000093616	0	-0.2	-0.2	1700055C04Rik	RIKEN cDNA 1700055C04 gene
ENSMUSG00000086376	0.116992	-0.2	-0.2	1700071G01Rik	RIKEN cDNA 1700071G01 gene
ENSMUSG00000084861	0.2	0	-0.2	1700095J07Rik	RIKEN cDNA 1700095J07 gene
ENSMUSG00000029837	0	0	-0.2	1700111E14Rik	RIKEN cDNA 1700111E14 gene
ENSMUSG00000056329	0	0	-0.2	1810010K12Rik	RIKEN cDNA 1810010K12 gene
ENSMUSG00000064308	0	0	-0.2	2410137M14Rik	RIKEN cDNA 2410137M14 gene
ENSMUSG00000085562	0	0	-0.2	2610028E06Rik	RIKEN cDNA 2610028E06 gene
ENSMUSG00000097561	-0.116992	-0.316993	-0.2	4632411P08Rik	RIKEN cDNA 4632411P08 gene
ENSMUSG00000090255	0	0	-0.2	4921534H16Rik	RIKEN cDNA 4921534H16 gene
ENSMUSG00000086352	0	0	-0.2	4930401G09Rik	RIKEN cDNA 4930401G09 gene
ENSMUSG00000097520	0	0	-0.2	4930488L21Rik	RIKEN cDNA 4930488L21 gene
ENSMUSG00000073803	0	-0.4	-0.2	4930544L04Rik	RIKEN cDNA 4930544L04 gene
ENSMUSG00000026882	0	-0.2	-0.2	4930568D16Rik	RIKEN cDNA 4930568D16 gene
ENSMUSG00000086190	0	-0.316993	-0.2	4930579M01Rik	RIKEN cDNA 4930579M01 gene
ENSMUSG00000085593	0	0	-0.2	4930589P08Rik	RIKEN cDNA 4930589P08 gene
ENSMUSG00000085398	0.283008	-0.0526069	-0.2	4931406G06Rik	RIKEN cDNA 4931406G06 gene
ENSMUSG00000062391	0.116992	0	-0.2	4932435O22Rik	RIKEN cDNA 4932435O22 gene
ENSMUSG00000087267	0	-0.2	-0.2	4933427J07Rik	RIKEN cDNA 4933427J07 gene
ENSMUSG00000054069	0	0	-0.2	6030452D12Rik	RIKEN cDNA 6030452D12 gene
ENSMUSG00000086474	0	0	-0.2	9130204K15Rik	RIKEN cDNA 9130204K15 gene
ENSMUSG00000085479	0.2	0	-0.2	9430073C21Rik	Riken cDNA 9430073C21 gene
ENSMUSG00000075405	0.0830075	0	-0.2	9430097D07Rik	RIKEN cDNA 9430097D07 gene
ENSMUSG00000047228	0	0	-0.2	A2ml1	alpha-2-macroglobulin like 1
ENSMUSG00000097182	0.2	-0.2	-0.2	A830009L08Rik	RIKEN cDNA A830009L08 gene
ENSMUSG00000087278	0.2	0	-0.2	A930006I01Rik	RIKEN cDNA A930006I01 gene
ENSMUSG00000040136	0.2	-0.2	-0.2	Abcc8	ATP-binding cassette, sub-family C (CFTR/MRP), member 8
ENSMUSG00000083722	0	0	-0.2	Adgrd2-ps	adhesion G protein-coupled receptor D2, pseudogene
ENSMUSG00000041293	0	-0.4	-0.2	Adgrf1	adhesion G protein-coupled receptor F1
ENSMUSG00000023918	0.2	0	-0.2	Adgrf4	adhesion G protein-coupled receptor F4
ENSMUSG00000074206	0	0	-0.2	Adh6b	alcohol dehydrogenase 6B (class V)
ENSMUSG00000028307	0.2	0	-0.2	Aldob	aldolase B, fructose-bisphosphate
ENSMUSG00000029282	0	0	-0.2	Amtn	amelotin
ENSMUSG00000044835	0	-0.4	-0.2	Ankrd45	ankyrin repeat domain 45
ENSMUSG00000030909	-0.2	-0.2	-0.2	Anks4b	ankyrin repeat and sterile alpha motif domain containing 4B
ENSMUSG00000035189	0	0	-0.2	Ano4	anoctamin 4
ENSMUSG00000083932	0	0	-0.2	Atp5k-ps3	ATP synthase, H+ transporting, mitochondrial F1F0 complex, subunit E, pseudogene 3
ENSMUSG00000079120	-0.0830075	-0.2	-0.2	AY761185	cDNA sequence AY761185
ENSMUSG00000060808	0.2	0	-0.2	B9d1os	B9 protein domain 1, opposite strand
ENSMUSG00000046317	0	0	-0.2	BC107364	cDNA sequence BC107364
ENSMUSG00000004892	0	0	-0.2	Bcan	brevican
ENSMUSG00000086999	0	-0.2	-0.2	Bcas1os2	brain enriched myelin associated protein 1, opposite strand 2
ENSMUSG00000082365	0	0	-0.2	Btf3-ps11	basic transcription factor 3, pseudogene 11
ENSMUSG00000045532	0.2	-0.2	-0.2	C1ql1	complement component 1, q subcomponent-like 1
ENSMUSG00000001076	0	0	-0.2	C1ql4	complement component 1, q subcomponent-like 4
ENSMUSG00000033765	0	-0.2	-0.2	Calm4	calmodulin 4
ENSMUSG00000024306	0	0	-0.2	Ccdc178	coiled coil domain containing 178
ENSMUSG00000048038	0	0	-0.2	Ccdc187	coiled-coil domain containing 187
ENSMUSG00000070999	-0.116992	0	-0.2	Ccin	calicin
ENSMUSG00000087604	0	-0.2	-0.2	Cdrt4os1	CMT1A duplicated region transcript 4, opposite strand 1
ENSMUSG00000061959	0	0	-0.2	Ces1e	carboxylesterase 1E
ENSMUSG00000021534	0	-0.4	-0.2	Cfap90	cilia and flagella associated protein 90
ENSMUSG00000030732	0.2	-0.116992	-0.2	Chrdl2	chordin-like 2
ENSMUSG00000032303	0	-0.2	-0.2	Chrna3	cholinergic receptor, nicotinic, alpha polypeptide 3
ENSMUSG00000030525	0	0	-0.2	Chrna7	cholinergic receptor, nicotinic, alpha polypeptide 7
ENSMUSG00000031492	0	-0.4	-0.2	Chrnb3	cholinergic receptor, nicotinic, beta polypeptide 3
ENSMUSG00000066720	0	0	-0.2	Cldn9	claudin 9
ENSMUSG00000074127	0	0	-0.2	Cmtm2a	CKLF-like MARVEL transmembrane domain containing 2A
ENSMUSG00000056162	0	0	-0.2	Cndp1	carnosine dipeptidase 1 (metallopeptidase M20 family)
ENSMUSG00000039070	0	0	-0.2	Cpa4	carboxypeptidase A4
ENSMUSG00000033615	0	-0.2	-0.2	Cplx1	complexin 1
ENSMUSG00000038135	0.294786	-0.033985	-0.2	Crygn	crystallin, gamma N
ENSMUSG00000001622	0	0	-0.2	Csn3	casein kappa
ENSMUSG00000083224	0	0	-0.2	Csnk2a1-ps4	casein kinase 2, alpha 1 polypeptide, pseudogene 4
ENSMUSG00000094733	0.2	0	-0.2	Csta3	cystatin A family member 3
ENSMUSG00000056728	0.2	0	-0.2	Ctsll3	cathepsin L-like 3
ENSMUSG00000029154	0	0	-0.2	Cwh43	cell wall biogenesis 43 C-terminal homolog
ENSMUSG00000039555	0	0	-0.2	Cylc2	cylicin, basic protein of sperm head cytoskeleton 2
ENSMUSG00000092471	0.116992	-0.033985	-0.2	Cyp21a2-ps	cytochrome P450, family 21, subfamily a, polypeptide 2 pseudogene
ENSMUSG00000040583	0	0	-0.2	Cyp2b13	cytochrome P450, family 2, subfamily b, polypeptide 13
ENSMUSG00000090700	-0.116992	-0.116992	-0.2	Cyp4f40	cytochrome P450, family 4, subfamily f, polypeptide 40
ENSMUSG00000096445	0	-0.2	-0.2	Dcpp1	demilune cell and parotid protein 1
ENSMUSG00000075571	0.116992	0	-0.2	Defb30	defensin beta 30
ENSMUSG00000038768	0.2	0	-0.2	Degs1l	delta 4-desaturase, sphingolipid 1 like
ENSMUSG00000041911	-0.2	-0.0830075	-0.2	Dlx1	distal-less homeobox 1
ENSMUSG00000086552	0	-0.2	-0.2	Dlx4os	distal-less homeobox 4, opposite strand
ENSMUSG00000027224	0	0	-0.2	Duoxa1	dual oxidase maturation factor 1
ENSMUSG00000025043	0	0	-0.2	Dusp21	dual specificity phosphatase 21
ENSMUSG00000069085	0	0	-0.2	Dytn	dystrotelin
ENSMUSG00000085091	0.2	0	-0.2	Egfros	epidermal growth factor receptor, opposite strand
ENSMUSG00000093847	0.116992	-0.116992	-0.2	Eif1ad15	eukaryotic translation initiation factor 1A domain containing 15
ENSMUSG00000043969	0	0	-0.2	Emx2	empty spiracles homeobox 2
ENSMUSG00000058665	-0.0830075	0	-0.2	En1	engrailed 1
ENSMUSG00000021255	-0.233985	-0.0830075	-0.2	Esrrb	estrogen related receptor, beta
ENSMUSG00000053360	0.2	0	-0.2	F730035P03Rik	RIKEN cDNA F730035P03 gene
ENSMUSG00000096753	0	0	-0.2	Fam181a	family with sequence similarity 181, member A
ENSMUSG00000089948	0	-0.2	-0.2	Far2os1	fatty acyl CoA reductase 2, opposite strand 1
ENSMUSG00000051062	0	0	-0.2	Fbll1	fibrillarin-like 1
ENSMUSG00000030001	0	0	-0.2	Figla	folliculogenesis specific basic helix-loop-helix
ENSMUSG00000026692	0.2	-0.2	-0.2	Fmo4	flavin containing monooxygenase 4
ENSMUSG00000045589	0	0	-0.2	Frrs1l	ferric-chelate reductase 1 like
ENSMUSG00000055789	0	-0.116992	-0.2	Ftdc2	ferritin domain containing 2
ENSMUSG00000055373	0	0	-0.2	Fut9	fucosyltransferase 9
ENSMUSG00000029212	0.2	0	-0.2	Gabrb1	gamma-aminobutyric acid (GABA) A receptor, subunit beta 1
ENSMUSG00000087264	0	0	-0.2	Gad1os	glutamate decarboxylase 1, opposite strand
ENSMUSG00000038259	0	0	-0.2	Gdf5	growth differentiation factor 5
ENSMUSG00000030049	0	0	-0.2	Gkn2	gastrokine 2
ENSMUSG00000066092	0	0	-0.2	Gm10152	predicted gene 10152
ENSMUSG00000068680	-0.116992	-0.2	-0.2	Gm10248	predicted gene 10248
ENSMUSG00000068924	0	0	-0.2	Gm10253	predicted gene 10253
ENSMUSG00000070886	0	0	-0.2	Gm10304	predicted gene 10304
ENSMUSG00000071517	0	-0.4	-0.2	Gm10334	predicted gene 10334
ENSMUSG00000073129	0	0.116992	-0.2	Gm10472	predicted gene 10472
ENSMUSG00000073173	0	0	-0.2	Gm10477	predicted gene 10477
ENSMUSG00000073528	0	0	-0.2	Gm10530	predicted gene 10530
ENSMUSG00000078430	0	0	-0.2	Gm10936	predicted gene 10936
ENSMUSG00000078912	0	0	-0.2	Gm11011	predicted gene 11011
ENSMUSG00000079010	0	0	-0.2	Gm11032	predicted gene 11032
ENSMUSG00000079392	-0.2	-0.2	-0.2	Gm11107	predicted gene 11107
ENSMUSG00000094880	0	0.116992	-0.2	Gm11109	predicted gene 11109
ENSMUSG00000083245	0	0	-0.2	Gm11185	predicted gene 11185
ENSMUSG00000081663	0	0	-0.2	Gm11207	predicted gene 11207
ENSMUSG00000079578	0	0	-0.2	Gm1140	predicted gene 1140
ENSMUSG00000073130	0	-0.316993	-0.2	Gm1141	predicted gene 1141
ENSMUSG00000082514	0	-0.2	-0.2	Gm11452	predicted gene 11452
ENSMUSG00000082566	0.2	-0.2	-0.2	Gm11485	predicted gene 11485
ENSMUSG00000086919	0	-0.2	-0.2	Gm11497	predicted gene 11497
ENSMUSG00000086408	0	0	-0.2	Gm11588	predicted gene 11588
ENSMUSG00000081270	0.2	0	-0.2	Gm11653	predicted gene 11653
ENSMUSG00000081524	0	0	-0.2	Gm11658	predicted gene 11658
ENSMUSG00000085134	0	0	-0.2	Gm11659	predicted gene 11659
ENSMUSG00000083228	0	0	-0.2	Gm11779	predicted gene 11779
ENSMUSG00000084983	0	0	-0.2	Gm11789	predicted gene 11789
ENSMUSG00000083376	0	0	-0.2	Gm11882	predicted gene 11882
ENSMUSG00000081101	0.2	0	-0.2	Gm12024	predicted gene 12024
ENSMUSG00000080735	0	0	-0.2	Gm12075	predicted gene 12075
ENSMUSG00000098456	0	0	-0.2	Gm12117	predicted gene 12117
ENSMUSG00000082271	0	0	-0.2	Gm12217	predicted gene 12217
ENSMUSG00000085459	0	-0.116992	-0.2	Gm12272	predicted gene 12272
ENSMUSG00000084805	0	0	-0.2	Gm12273	predicted gene 12273
ENSMUSG00000082370	0.2	-0.2	-0.2	Gm12313	predicted gene 12313
ENSMUSG00000082983	0.2	-0.2	-0.2	Gm12318	predicted gene 12318
ENSMUSG00000087398	0	0	-0.2	Gm12343	predicted gene 12343
ENSMUSG00000083743	0.116992	-0.2	-0.2	Gm12421	predicted gene 12421
ENSMUSG00000082725	0	-0.4	-0.2	Gm12451	predicted gene 12451
ENSMUSG00000081050	0	0	-0.2	Gm12461	predicted gene 12461
ENSMUSG00000081688	0	-0.4	-0.2	Gm12499	predicted gene 12499
ENSMUSG00000085643	0.2	0	-0.2	Gm12519	predicted gene 12519
ENSMUSG00000086470	0.2	-0.2	-0.2	Gm12580	predicted gene 12580
ENSMUSG00000085126	0.2	-0.2	-0.2	Gm12589	predicted gene 12589
ENSMUSG00000080808	0	-0.2	-0.2	Gm12608	predicted gene 12608
ENSMUSG00000082622	-0.2	-0.2	-0.2	Gm12632	predicted gene 12632
ENSMUSG00000073797	0	0	-0.2	Gm12650	predicted gene 12650
ENSMUSG00000085710	0.2	0	-0.2	Gm12676	predicted gene 12676
ENSMUSG00000081127	0	-0.2	-0.2	Gm12677	predicted gene 12677
ENSMUSG00000085790	0.2	0	-0.2	Gm12729	predicted gene 12729
ENSMUSG00000083957	0.2	0	-0.2	Gm12742	predicted gene 12742
ENSMUSG00000083599	0	0	-0.2	Gm12821	predicted gene 12821
ENSMUSG00000081921	0	0	-0.2	Gm12858	predicted gene 12858
ENSMUSG00000083720	0.316993	-0.2	-0.2	Gm12901	predicted gene 12901
ENSMUSG00000082814	0	0	-0.2	Gm12956	predicted gene 12956
ENSMUSG00000082833	0	0	-0.2	Gm12982	predicted gene 12982
ENSMUSG00000082207	0	0	-0.2	Gm12998	predicted gene 12998
ENSMUSG00000078518	0	0	-0.2	Gm13030	predicted gene 13030
ENSMUSG00000085816	0.2	-0.2	-0.2	Gm13052	predicted gene 13052
ENSMUSG00000087525	0.2	-0.2	-0.2	Gm13062	predicted gene 13062
ENSMUSG00000082176	0.116992	-0.2	-0.2	Gm13163	predicted gene 13163
ENSMUSG00000086874	0	-0.2	-0.2	Gm13175	predicted gene 13175
ENSMUSG00000083473	-0.2	-0.2	-0.2	Gm13207	predicted gene 13207
ENSMUSG00000085257	0	0	-0.2	Gm13264	predicted gene 13264
ENSMUSG00000084901	0	0	-0.2	Gm13266	predicted gene 13266
ENSMUSG00000082314	0	0	-0.2	Gm13296	predicted gene 13296
ENSMUSG00000081693	0	0	-0.2	Gm13297	predicted gene 13297
ENSMUSG00000082414	0	0	-0.2	Gm13303	predicted gene 13303
ENSMUSG00000083335	0.2	0	-0.2	Gm13397	predicted gene 13397
ENSMUSG00000082679	0.2	-0.2	-0.2	Gm13469	predicted gene 13469
ENSMUSG00000082096	0	0	-0.2	Gm13505	predicted gene 13505
ENSMUSG00000084338	0	-0.2	-0.2	Gm13531	predicted gene 13531
ENSMUSG00000081817	0	0	-0.2	Gm13590	predicted gene 13590
ENSMUSG00000083707	0	0	-0.2	Gm13592	predicted gene 13592
ENSMUSG00000081954	0	0	-0.2	Gm13626	predicted gene 13626
ENSMUSG00000086549	-0.2	-0.2	-0.2	Gm13648	predicted gene 13648
ENSMUSG00000084087	0	0	-0.2	Gm13650	predicted gene 13650
ENSMUSG00000082494	0	0	-0.2	Gm13687	predicted gene 13687
ENSMUSG00000081853	0	0	-0.2	Gm13735	predicted gene 13735
ENSMUSG00000081132	0	0	-0.2	Gm13744	predicted gene 13744
ENSMUSG00000044689	0	-0.0830075	-0.2	Gm13749	predicted gene 13749
ENSMUSG00000083846	0.2	0	-0.2	Gm13797	predicted gene 13797
ENSMUSG00000087465	0	0	-0.2	Gm13905	predicted gene 13905
ENSMUSG00000086203	0.0830075	0	-0.2	Gm13985	predicted gene 13985
ENSMUSG00000087158	0	-0.2	-0.2	Gm14093	predicted gene 14093
ENSMUSG00000083715	0	0	-0.2	Gm14202	predicted gene 14202
ENSMUSG00000086163	0	0	-0.2	Gm14206	predicted gene 14206
ENSMUSG00000085908	-0.264386	-0.135614	-0.2	Gm14209	predicted gene 14209
ENSMUSG00000085709	0.316993	-0.2	-0.2	Gm14211	predicted gene 14211
ENSMUSG00000085469	0	0	-0.2	Gm14242	predicted gene 14242
ENSMUSG00000087616	0.2	0	-0.2	Gm14257	predicted gene 14257
ENSMUSG00000085682	0	0	-0.2	Gm14267	predicted gene 14267
ENSMUSG00000085699	0	0	-0.2	Gm14298	predicted gene 14298
ENSMUSG00000082025	0	0	-0.2	Gm14359	predicted gene 14359
ENSMUSG00000085966	0	0	-0.2	Gm14368	predicted gene 14368
ENSMUSG00000082210	0	-0.2	-0.2	Gm14382	predicted gene 14382
ENSMUSG00000083760	0	0	-0.2	Gm14524	predicted gene 14524
ENSMUSG00000086834	0.116992	0	-0.2	Gm14547	predicted gene 14547
ENSMUSG00000081089	0	0	-0.2	Gm14624	predicted gene 14624
ENSMUSG00000096127	0	0	-0.2	Gm14625	predicted gene 14625
ENSMUSG00000087591	0	-0.2	-0.2	Gm14635	predicted gene 14635
ENSMUSG00000082092	0	0	-0.2	Gm14665	predicted gene 14665
ENSMUSG00000079577	0	0	-0.2	Gm14692	predicted gene 14692
ENSMUSG00000081881	0.2	0	-0.2	Gm14752	predicted gene 14752
ENSMUSG00000087232	0.2	-0.2	-0.2	Gm14764	predicted gene 14764
ENSMUSG00000083114	0	0	-0.2	Gm14790	predicted gene 14790
ENSMUSG00000083603	0	-0.4	-0.2	Gm14810	predicted gene 14810
ENSMUSG00000082174	0	0	-0.2	Gm14877	predicted gene 14877
ENSMUSG00000081271	0	0	-0.2	Gm14883	predicted gene 14883
ENSMUSG00000081209	0	0	-0.2	Gm14890	predicted gene 14890
ENSMUSG00000082392	0	0	-0.2	Gm14938	predicted gene 14938
ENSMUSG00000083636	0	0	-0.2	Gm15175	predicted gene 15175
ENSMUSG00000083516	0	0	-0.2	Gm15196	predicted gene 15196
ENSMUSG00000080834	0	0	-0.2	Gm15216	predicted gene 15216
ENSMUSG00000086870	0	0	-0.2	Gm15288	predicted gene 15288
ENSMUSG00000082447	0	0	-0.2	Gm15364	predicted gene 15364
ENSMUSG00000087647	0	-0.2	-0.2	Gm15407	predicted gene 15407
ENSMUSG00000053049	0.0830075	-0.2	-0.2	Gm15413	predicted gene 15413
ENSMUSG00000087093	0.2	0	-0.2	Gm15486	predicted gene 15486
ENSMUSG00000085953	0.2	0	-0.2	Gm15496	predicted gene 15496
ENSMUSG00000086604	0	-0.4	-0.2	Gm15510	predicted gene 15510
ENSMUSG00000083622	0.2	0.033985	-0.2	Gm15570	predicted gene 15570
ENSMUSG00000081872	0	-0.2	-0.2	Gm15572	predicted gene 15572
ENSMUSG00000087389	0	0	-0.2	Gm15592	predicted gene 15592
ENSMUSG00000080748	0	0	-0.2	Gm15661	predicted gene 15661
ENSMUSG00000082823	0	0	-0.2	Gm15828	predicted gene 15828
ENSMUSG00000086868	0	0	-0.2	Gm15883	predicted gene 15883
ENSMUSG00000085345	0	0	-0.2	Gm16064	predicted gene 16064
ENSMUSG00000087322	0	0	-0.2	Gm16075	predicted gene 16075
ENSMUSG00000086633	0	0	-0.2	Gm16081	predicted gene 16081
ENSMUSG00000086585	-0.116992	-0.2	-0.2	Gm16126	predicted gene 16126
ENSMUSG00000090040	0	-0.2	-0.2	Gm16232	predicted gene 16232
ENSMUSG00000086372	-0.116992	-0.316993	-0.2	Gm16246	predicted gene 16246
ENSMUSG00000089807	0	0	-0.2	Gm16298	predicted gene 16298
ENSMUSG00000085592	0	0	-0.2	Gm16321	predicted gene 16321
ENSMUSG00000084954	0.2	0	-0.2	Gm16351	predicted gene 16351
ENSMUSG00000085288	0	0	-0.2	Gm16356	predicted gene 16356
ENSMUSG00000085366	0	0	-0.2	Gm16358	predicted gene 16358
ENSMUSG00000086489	0	0	-0.2	Gm16362	predicted gene 16362
ENSMUSG00000098091	0	-0.2	-0.2	Gm16470	predicted pseudogene 16470
ENSMUSG00000090989	0.0830075	0	-0.2	Gm17042	predicted gene 17042
ENSMUSG00000090328	0	0	-0.2	Gm17073	predicted gene 17073
ENSMUSG00000090955	0.0830075	-0.316993	-0.2	Gm17097	predicted gene 17097
ENSMUSG00000090589	0	0	-0.2	Gm17180	predicted gene 17180
ENSMUSG00000091195	0	0	-0.2	Gm17332	predicted gene, 17332
ENSMUSG00000097402	0	0	-0.2	Gm17399	predicted gene, 17399
ENSMUSG00000092093	0	0	-0.2	Gm17528	predicted gene, 17528
ENSMUSG00000097945	0	-0.116992	-0.2	Gm17799	predicted gene, 17799
ENSMUSG00000092184	0.2	0	-0.2	Gm18489	predicted gene, 18489
ENSMUSG00000093516	0	0	-0.2	Gm19553	predicted gene, 19553
ENSMUSG00000092553	0	0	-0.2	Gm20428	predicted gene 20428
ENSMUSG00000097948	0	0	-0.2	Gm21430	predicted gene, 21430
ENSMUSG00000097288	-0.116992	0	-0.2	Gm2155	predicted gene 2155
ENSMUSG00000094030	0	0	-0.2	Gm21833	predicted gene, 21833
ENSMUSG00000095369	0	0	-0.2	Gm21859	predicted gene, 21859
ENSMUSG00000094962	0.0643856	0	-0.2	Gm21954	predicted gene, 21954
ENSMUSG00000095469	0	0.116992	-0.2	Gm21965	predicted gene, 21965
ENSMUSG00000096330	0	-0.2	-0.2	Gm21976	predicted gene 21976
ENSMUSG00000077542	0	0	-0.2	Gm22023	predicted gene, 22023
ENSMUSG00000065320	0	-0.116992	-0.2	Gm22056	predicted gene, 22056
ENSMUSG00000088964	0	0	-0.2	Gm22087	predicted gene, 22087
ENSMUSG00000092888	0	0	-0.2	Gm22122	predicted gene, 22122
ENSMUSG00000065853	0	0	-0.2	Gm22354	predicted gene, 22354
ENSMUSG00000065034	0	-0.316993	-0.2	Gm22363	predicted gene, 22363
ENSMUSG00000064890	0	-0.316993	-0.2	Gm22505	predicted gene, 22505
ENSMUSG00000065667	0	0	-0.2	Gm22576	predicted gene, 22576
ENSMUSG00000077384	0	0	-0.2	Gm22658	predicted gene, 22658
ENSMUSG00000088719	0.2	-0.2	-0.2	Gm22733	predicted gene, 22733
ENSMUSG00000089184	0	-0.2	-0.2	Gm22947	predicted gene, 22947
ENSMUSG00000077339	0	-0.2	-0.2	Gm23010	predicted gene, 23010
ENSMUSG00000064735	0.2	-0.2	-0.2	Gm23057	predicted gene, 23057
ENSMUSG00000077448	0	0	-0.2	Gm23126	predicted gene, 23126
ENSMUSG00000087780	0	-0.316993	-0.2	Gm23167	predicted gene, 23167
ENSMUSG00000089290	0	-0.4	-0.2	Gm23207	predicted gene, 23207
ENSMUSG00000075952	0	0	-0.2	Gm23422	predicted gene, 23422
ENSMUSG00000084437	0.2	-0.2	-0.2	Gm23428	predicted gene, 23428
ENSMUSG00000089504	0.2	0	-0.2	Gm23475	predicted gene, 23475
ENSMUSG00000077497	-0.116992	0	-0.2	Gm23593	predicted gene, 23593
ENSMUSG00000088201	0	0	-0.2	Gm23754	predicted gene, 23754
ENSMUSG00000088888	0	0	-0.2	Gm24210	predicted gene, 24210
ENSMUSG00000077505	0.2	-0.2	-0.2	Gm24233	predicted gene, 24233
ENSMUSG00000077392	0	0	-0.2	Gm24337	predicted gene, 24337
ENSMUSG00000064665	0	0	-0.2	Gm24460	predicted gene, 24460
ENSMUSG00000077155	0	0	-0.2	Gm24582	predicted gene, 24582
ENSMUSG00000084459	0.2	-0.2	-0.2	Gm24598	predicted gene, 24598
ENSMUSG00000077561	0.2	0	-0.2	Gm24607	predicted gene, 24607
ENSMUSG00000089299	0	0	-0.2	Gm24637	predicted gene, 24637
ENSMUSG00000088853	0.2	-0.2	-0.2	Gm24730	predicted gene, 24730
ENSMUSG00000077476	0	0	-0.2	Gm24794	predicted gene, 24794
ENSMUSG00000089513	0	-0.0490225	-0.2	Gm24875	predicted gene, 24875
ENSMUSG00000077648	0	0	-0.2	Gm24988	predicted gene, 24988
ENSMUSG00000088037	-0.0830075	0	-0.2	Gm24992	predicted gene, 24992
ENSMUSG00000089024	0.2	-0.2	-0.2	Gm25016	predicted gene, 25016
ENSMUSG00000064632	0	0	-0.2	Gm25142	predicted gene, 25142
ENSMUSG00000065027	0	0	-0.2	Gm25201	predicted gene, 25201
ENSMUSG00000077769	0	0	-0.2	Gm25215	predicted gene, 25215
ENSMUSG00000065692	0	0	-0.2	Gm25410	predicted gene, 25410
ENSMUSG00000077527	0	-0.2	-0.2	Gm25506	predicted gene, 25506
ENSMUSG00000088325	0	-0.4	-0.2	Gm25668	predicted gene, 25668
ENSMUSG00000065220	0	0	-0.2	Gm25794	predicted gene, 25794
ENSMUSG00000064722	0	-0.2	-0.2	Gm25857	predicted gene, 25857
ENSMUSG00000077592	0.2	0	-0.2	Gm26013	predicted gene, 26013
ENSMUSG00000089302	0	0	-0.2	Gm26208	predicted gene, 26208
ENSMUSG00000087722	0	0	-0.2	Gm26277	predicted gene, 26277
ENSMUSG00000088451	0	0	-0.2	Gm26368	predicted gene, 26368
ENSMUSG00000077465	0	-0.2	-0.2	Gm26423	predicted gene, 26423
ENSMUSG00000064527	0	0	-0.2	Gm26438	predicted gene, 26438
ENSMUSG00000097079	0.2	0	-0.2	Gm26604	predicted gene, 26604
ENSMUSG00000097196	0	0	-0.2	Gm26665	predicted gene, 26665
ENSMUSG00000097888	0.2	0.116992	-0.2	Gm26682	predicted gene, 26682
ENSMUSG00000097116	0	0	-0.2	Gm26729	predicted gene, 26729
ENSMUSG00000097801	0	0	-0.2	Gm26777	predicted gene, 26777
ENSMUSG00000097408	0	0	-0.2	Gm26831	predicted gene, 26831
ENSMUSG00000097642	0	0	-0.2	Gm26866	predicted gene, 26866
ENSMUSG00000096949	0	0	-0.2	Gm26897	predicted gene, 26897
ENSMUSG00000097798	0	0	-0.2	Gm26898	predicted gene, 26898
ENSMUSG00000097241	0	0	-0.2	Gm26907	predicted gene, 26907
ENSMUSG00000098110	0	0	-0.2	Gm26956	predicted gene, 26956
ENSMUSG00000098053	0	0	-0.2	Gm27033	predicted gene, 27033
ENSMUSG00000098519	0	0	-0.2	Gm27166	predicted gene 27166
ENSMUSG00000099057	0	0	-0.2	Gm27185	predicted gene 27185
ENSMUSG00000099276	0.2	0	-0.2	Gm27228	predicted gene 27228
ENSMUSG00000098801	0	0	-0.2	Gm27255	predicted gene 27255
ENSMUSG00000096614	0	0	-0.2	Gm2871	predicted gene 2871
ENSMUSG00000091762	0	0	-0.2	Gm3191	predicted gene 3191
ENSMUSG00000097156	0.2	0	-0.2	Gm3764	predicted gene 3764
ENSMUSG00000093721	-0.2	-0.2	-0.2	Gm3896	predicted gene 3896
ENSMUSG00000086804	0	0	-0.2	Gm43154	predicted gene 43154
ENSMUSG00000080847	0.2	0.116992	-0.2	Gm4773	predicted gene 4773
ENSMUSG00000095168	0	0	-0.2	Gm4795	predicted pseudogene 4795
ENSMUSG00000082117	0	0	-0.2	Gm4994	predicted gene 4994
ENSMUSG00000083978	0.2	-0.2	-0.2	Gm5060	predicted gene 5060
ENSMUSG00000090671	0	0	-0.2	Gm5067	predicted gene 5067
ENSMUSG00000087208	0	-0.2	-0.2	Gm5125	predicted gene 5125
ENSMUSG00000056089	0.2	0	-0.2	Gm5468	predicted gene 5468
ENSMUSG00000061969	0	0	-0.2	Gm5581	predicted gene 5581
ENSMUSG00000093812	0.2	0	-0.2	Gm5627	predicted gene 5627
ENSMUSG00000072952	0	0	-0.2	Gm5878	predicted gene 5878
ENSMUSG00000098003	0	0	-0.2	Gm6317	predicted gene 6317
ENSMUSG00000081778	0	0	-0.2	Gm6325	predicted gene 6325
ENSMUSG00000094215	0.2	0	-0.2	Gm6489	predicted gene 6489
ENSMUSG00000081259	0	-0.2	-0.2	Gm6893	predicted gene 6893
ENSMUSG00000096517	-0.2	-0.2	-0.2	Gm6919	predicted gene 6919
ENSMUSG00000079963	0	0	-0.2	Gm7146	predicted pseudogene 7146
ENSMUSG00000067941	0	0	-0.2	Gm7168	predicted gene 7168
ENSMUSG00000083874	0	0	-0.2	Gm7494	predicted gene 7494
ENSMUSG00000080760	0	0	-0.2	Gm7571	predicted gene 7571
ENSMUSG00000082608	0	0	-0.2	Gm7670	predicted gene 7670
ENSMUSG00000084205	-0.2	-0.2	-0.2	Gm8061	predicted gene 8061
ENSMUSG00000096286	0	-0.2	-0.2	Gm8266	predicted gene 8266
ENSMUSG00000098222	0	-0.2	-0.2	Gm8318	predicted gene 8318
ENSMUSG00000090578	0	0	-0.2	Gm8323	predicted gene 8323
ENSMUSG00000093543	0	0	-0.2	Gm8473	predicted gene 8473
ENSMUSG00000081364	0	-0.2	-0.2	Gm8595	predicted gene 8595
ENSMUSG00000098007	0	0	-0.2	Gm8614	predicted gene 8614
ENSMUSG00000083166	0.2	0	-0.2	Gm8648	predicted gene 8648
ENSMUSG00000083611	0	-0.0643856	-0.2	Gm8832	predicted gene 8832
ENSMUSG00000098083	0	0	-0.2	Gm8957	predicted gene 8957
ENSMUSG00000064081	0	-0.316993	-0.2	Gm8973	predicted gene 8973
ENSMUSG00000095826	0	0	-0.2	Gm9002	predicted gene 9002
ENSMUSG00000098171	0	0	-0.2	Gm9621	predicted gene 9621
ENSMUSG00000053214	0.2	-0.2	-0.2	Gm9899	predicted gene 9899
ENSMUSG00000034677	0	-0.2	-0.2	Gpr142	G protein-coupled receptor 142
ENSMUSG00000043441	0.2	-0.2	-0.2	Gpr149	G protein-coupled receptor 149
ENSMUSG00000045281	0.2	0	-0.2	Gpr20	G protein-coupled receptor 20
ENSMUSG00000031450	0.0830075	0	-0.2	Grk1	G protein-coupled receptor kinase 1
ENSMUSG00000021933	0	-0.4	-0.2	Gucy1b2	guanylate cyclase 1, soluble, beta 2
ENSMUSG00000042282	0	0	-0.2	Gucy2f	guanylate cyclase 2f
ENSMUSG00000036211	0.2	0.116992	-0.2	H1f6	H1.6 linker histone, cluster member
ENSMUSG00000067201	0.2	0	-0.2	H2-M9	histocompatibility 2, M region locus 9
ENSMUSG00000025075	0.0830075	-0.316993	-0.2	Habp2	hyaluronic acid binding protein 2
ENSMUSG00000075277	0	0	-0.2	Haglr	Hoxd antisense growth associated long non-coding RNA
ENSMUSG00000050440	0	0	-0.2	Hamp	hepcidin antimicrobial peptide
ENSMUSG00000004894	0	0	-0.2	Hapln2	hyaluronan and proteoglycan link protein 2
ENSMUSG00000086054	0.233985	-0.2	-0.2	Hnf1aos1	HNF1 homeobox A, opposite strand 1
ENSMUSG00000022484	0	0	-0.2	Hoxc10	homeobox C10
ENSMUSG00000036139	0	-0.4	-0.2	Hoxc9	homeobox C9
ENSMUSG00000022877	0	0	-0.2	Hrg	histidine-rich glycoprotein
ENSMUSG00000033520	-0.116992	-0.316993	-0.2	Idi2	isopentenyl-diphosphate delta isomerase 2
ENSMUSG00000095592	0.116992	-0.116992	-0.2	Ighd5-7	immunoglobulin heavy diversity 5-7
ENSMUSG00000076573	0	0	-0.2	Igkv1-35	immunoglobulin kappa variable 1-35
ENSMUSG00000066090	0	0	-0.2	Insl5	insulin-like 5
ENSMUSG00000066383	0	-0.2	-0.2	Iqcf1	IQ motif containing F1
ENSMUSG00000040797	0	-0.2	-0.2	Iqsec3	IQ motif and Sec7 domain 3
ENSMUSG00000049128	0	-0.2	-0.2	Ivl	involucrin
ENSMUSG00000060882	0	0	-0.2	Kcnd2	potassium voltage-gated channel, Shal-related family, member 2
ENSMUSG00000039639	0.2	0	-0.2	Kcne1	potassium voltage-gated channel, Isk-related subfamily, member 1
ENSMUSG00000026824	0.2	-0.2	-0.2	Kcnj3	potassium inwardly-rectifying channel, subfamily J, member 3
ENSMUSG00000035238	0.2	0	-0.2	Kcnk15	potassium channel, subfamily K, member 15
ENSMUSG00000047298	0	0	-0.2	Kcnv2	potassium channel, subfamily V, member 2
ENSMUSG00000041722	0	0	-0.2	Khdc1c	KH domain containing 1C
ENSMUSG00000048626	0	0	-0.2	Klf17	Kruppel-like transcription factor 17
ENSMUSG00000091680	0	0	-0.2	Klhdc7b	kelch domain containing 7B
ENSMUSG00000022076	0	0	-0.2	Klhl1	kelch-like 1
ENSMUSG00000024903	0.2	0	-0.2	Lao1	L-amino acid oxidase 1
ENSMUSG00000066652	0.2	0	-0.2	Lefty2	left-right determination factor 2
ENSMUSG00000033595	0.0865919	-0.4	-0.2	Lgi3	leucine-rich repeat LGI family, member 3
ENSMUSG00000087211	0	0	-0.2	Lhx1os	LIM homeobox 1, opposite strand
ENSMUSG00000093865	0	0	-0.2	Lrit3	leucine-rich repeat, immunoglobulin-like and transmembrane domains 3
ENSMUSG00000063409	0	0	-0.2	Lrrc43	leucine rich repeat containing 43
ENSMUSG00000045776	0	0	-0.2	Lrtm1	leucine-rich repeats and transmembrane domains 1
ENSMUSG00000022577	0.233985	0.033985	-0.2	Ly6h	lymphocyte antigen 6 complex, locus H
ENSMUSG00000096644	0	0	-0.2	Magea1	MAGE family member A1
ENSMUSG00000055746	0	0	-0.2	Magea2	MAGE family member A2
ENSMUSG00000062162	0	-0.2	-0.2	Mageb1	MAGE family member B1
ENSMUSG00000046942	0.181378	0	-0.2	Mageb16	MAGE family member B16
ENSMUSG00000073069	0	-0.2	-0.2	Mageb2	MAGE family member B2
ENSMUSG00000022780	0	0	-0.2	Meltf	melanotransferrin
ENSMUSG00000080665	0	-0.2	-0.2	Mir1199	microRNA 1199
ENSMUSG00000098539	0	0	-0.2	Mir133c	microRNA 133c
ENSMUSG00000065515	0	0	-0.2	Mir152	microRNA 152
ENSMUSG00000098465	0	0	-0.2	Mir1668	microRNA 1668
ENSMUSG00000076379	0	0	-0.2	Mir190a	microRNA 190a
ENSMUSG00000065523	0	0	-0.2	Mir192	microRNA 192
ENSMUSG00000088459	0	0	-0.2	Mir1941	microRNA 1941
ENSMUSG00000088544	0	-0.2	-0.2	Mir1945	microRNA 1945
ENSMUSG00000088141	0	0	-0.2	Mir1962	microRNA 1962
ENSMUSG00000076041	0	0	-0.2	Mir20b	microRNA 20b
ENSMUSG00000065611	-0.0830075	-0.316993	-0.2	Mir23a	microRNA 23a
ENSMUSG00000077886	0	0	-0.2	Mir295	microRNA 295
ENSMUSG00000065552	0	0	-0.2	Mir302a	microRNA 302a
ENSMUSG00000092673	0	0	-0.2	Mir3067	microRNA 3067
ENSMUSG00000065617	0	0	-0.2	Mir323	microRNA 323
ENSMUSG00000065510	-0.2	-0.2	-0.2	Mir361	microRNA 361
ENSMUSG00000065489	0	0	-0.2	Mir365-2	microRNA 365-2
ENSMUSG00000087855	0	0	-0.2	Mir432	microRNA 432
ENSMUSG00000078031	0	0	-0.2	Mir466d	microRNA 466d
ENSMUSG00000092990	0.2	0	-0.2	Mir466q	microRNA 466q
ENSMUSG00000077025	0	0	-0.2	Mir493	microRNA 493
ENSMUSG00000070110	0	0	-0.2	Mir504	microRNA 504
ENSMUSG00000093498	0	0	-0.2	Mir5615-2	microRNA 5615-2
ENSMUSG00000098658	0	0	-0.2	Mir6338	microRNA 6338
ENSMUSG00000098607	0.2	-0.2	-0.2	Mir6360	microRNA 6360
ENSMUSG00000076376	-0.2	-0.2	-0.2	Mir674	microRNA 674
ENSMUSG00000076398	0	0	-0.2	Mir676	microRNA 676
ENSMUSG00000098279	0	-0.2	-0.2	Mir6908	microRNA 6908
ENSMUSG00000098613	0	0	-0.2	Mir6931	microRNA 6931
ENSMUSG00000099006	0	0	-0.2	Mir6974	microRNA 6974
ENSMUSG00000098267	0	0	-0.2	Mir7060	microRNA 7060
ENSMUSG00000099092	0	0	-0.2	Mir7062	microRNA 7062
ENSMUSG00000098327	0	-0.116992	-0.2	Mir7087	microRNA 7087
ENSMUSG00000098831	0	0	-0.2	Mir7119	microRNA 7119
ENSMUSG00000098489	0	-0.316993	-0.2	Mir7678	microRNA 7678
ENSMUSG00000098957	0	0	-0.2	Mir8105	microRNA 8105
ENSMUSG00000098310	0	0	-0.2	Mir8118	microRNA 8118
ENSMUSG00000097023	0	0	-0.2	Mir9-3hg	Mir9-3 host gene
ENSMUSG00000056509	0	-0.116992	-0.2	Misfa	mitochondrial sheath formation associated
ENSMUSG00000050425	0	0	-0.2	Mrgprb2	MAS-related GPR, member B2
ENSMUSG00000041062	0.316993	-0.2	-0.2	Mslnl	mesothelin-like
ENSMUSG00000064359	0.2	0	-0.2	mt-Tg	mitochondrially encoded tRNA glycine
ENSMUSG00000073408	0.316993	-0.116992	-0.2	Mucl3	mucin like 3
ENSMUSG00000035923	0	0	-0.2	Myf6	myogenic factor 6
ENSMUSG00000046000	0	0	-0.2	Naa11	N(alpha)-acetyltransferase 11, NatA catalytic subunit
ENSMUSG00000022054	0	0	-0.2	Nefm	neurofilament, medium polypeptide
ENSMUSG00000038255	0	0	-0.2	Neurod2	neurogenic differentiation 2
ENSMUSG00000034690	0	0	-0.2	Nlrp4c	NLR family, pyrin domain containing 4C
ENSMUSG00000041138	0.2	0	-0.2	Nme8	NME/NM23 family member 8
ENSMUSG00000020090	0	0	-0.2	Npffr1	neuropeptide FF receptor 1
ENSMUSG00000029819	0	0	-0.2	Npy	neuropeptide Y
ENSMUSG00000041358	0.2	0	-0.2	Nutm1	NUT midline carcinoma, family member 1
ENSMUSG00000045518	0.2	-0.2	-0.2	Onecut3	one cut domain, family member 3
ENSMUSG00000066239	-0.116992	0	-0.2	Or10a3n	olfactory receptor family 10 subfamily A member 3N
ENSMUSG00000060030	0	0	-0.2	Or2w3b	olfactory receptor family 2 subfamily W member 3B
ENSMUSG00000075066	0	0	-0.2	Or4b1d	olfactory receptor family 4 subfamily B member 1D
ENSMUSG00000049149	0	-0.2	-0.2	Or4c10	olfactory receptor family 4 subfamily C member 10
ENSMUSG00000057564	-0.2	-0.2	-0.2	Or4e1	olfactory receptor family 4 subfamily E member 1
ENSMUSG00000082980	0	0	-0.2	Or4x13	olfactory receptor family 4 subfamily X member 13
ENSMUSG00000089859	0	0	-0.2	Or4x18	olfactory receptor family 4 subfamily X member 18
ENSMUSG00000067525	0	0	-0.2	Or4z4	olfactory receptor family 4 subfamily Z member 4
ENSMUSG00000081016	-0.2	-0.116992	-0.2	Or51q1b-ps1	olfactory receptor family 51 subfamily Q member 1B, pseudogene 1
ENSMUSG00000073916	0	0	-0.2	Or52n5	olfactory receptor family 52 subfamily N member 5
ENSMUSG00000047535	0.316993	-0.2	-0.2	Or52z1	olfactory receptor family 52 subfamily Z member 1
ENSMUSG00000044286	0	0	-0.2	Or5au1	olfactory receptor family 5 subfamily AU member 1
ENSMUSG00000051051	0.2	0	-0.2	Or6f2	olfactory receptor family 6 subfamily F member 2
ENSMUSG00000060205	0	0	-0.2	Or7a41	olfactory receptor family 7 subfamily A member 41
ENSMUSG00000066896	0	-0.2	-0.2	Or7e178	olfactory receptor family 7 subfamily E member 178
ENSMUSG00000095957	0.2	0	-0.2	Or7g19	olfactory receptor family 7 subfamily G member 19
ENSMUSG00000050201	0	0	-0.2	Otop2	otopetrin 2
ENSMUSG00000044359	0	0	-0.2	P2ry4	pyrimidinergic receptor P2Y, G-protein coupled, 4
ENSMUSG00000020051	0.2	-0.361471	-0.2	Pah	phenylalanine hydroxylase
ENSMUSG00000085019	0	0	-0.2	Pard3bos2	par-3 family cell polarity regulator beta, opposite strand 2
ENSMUSG00000029706	0	0	-0.2	Pax4	paired box 4
ENSMUSG00000066438	-0.2	-0.2	-0.2	Plekhd1	pleckstrin homology domain containing, family D (with coiled-coil domains) member 1
ENSMUSG00000032015	0	-0.316993	-0.2	Pou2f3	POU domain, class 2, transcription factor 3
ENSMUSG00000095139	0.2	0	-0.2	Pou3f2	POU domain, class 3, transcription factor 2
ENSMUSG00000024406	0.2	0	-0.2	Pou5f1	POU domain, class 5, transcription factor 1
ENSMUSG00000078451	0	-0.4	-0.2	Ppil6	peptidylprolyl isomerase (cyclophilin)-like 6
ENSMUSG00000031411	0	0	-0.2	Pramex1	PRAME like, X-linked 1
ENSMUSG00000081845	0	0	-0.2	Prkaca-ps1	protein kinase, cAMP dependent, catalytic, alpha pseudogene 1
ENSMUSG00000079092	0	0.116992	-0.2	Prl2c2	prolactin family 2, subfamily c, member 2
ENSMUSG00000038891	0	0	-0.2	Prl3b1	prolactin family 3, subfamily b, member 1
ENSMUSG00000038015	0	0	-0.2	Prm2	protamine 2
ENSMUSG00000079654	0	0	-0.2	Prrt4	proline-rich transmembrane protein 4
ENSMUSG00000095331	0	0	-0.2	Ptma-ps1	prothymosin alpha, pseudogene 1
ENSMUSG00000044172	0	0	-0.2	Ptx4	pentraxin 4
[truncated: 271 more rows]

## Sheet: Cluster 2
Gene ID	Day 4	Day 7	Day 35	Gene symbol	Gene name
ENSMUSG00000064620	-0.498371	1.45261	-2.29153	Gm22303	predicted gene, 22303
ENSMUSG00000088246	-0.0535421	0.561437	-1.98819	No associated gene
ENSMUSG00000082550	0.116992	0.264386	-1.82586	Gm12344	predicted gene 12344
ENSMUSG00000061068	-0.376084	0.0351143	-1.80806	Mcpt4	mast cell protease 4
ENSMUSG00000088609	0.0305731	0.453546	-1.78224	No associated gene
ENSMUSG00000086324	-0.0651931	0.404676	-1.75707	Gm15564	predicted gene 15564
ENSMUSG00000076281	0.150059	0.380538	-1.73913	No associated gene
ENSMUSG00000098973	-0.0113363	0.304947	-1.67518	Mir6236	microRNA 6236
ENSMUSG00000097068	-0.993445	0.342849	-1.64523	Gm26760	predicted gene, 26760
ENSMUSG00000045694	-0.0897802	0.267824	-1.634	Gm4997	predicted gene 4997
ENSMUSG00000065331	-0.180093	1.36276	-1.61536	Gm24927	predicted gene, 24927
ENSMUSG00000096932	-0.8	0.561471	-1.61536	5033403F01Rik	RIKEN cDNA 5033403F01 gene
ENSMUSG00000086916	-0.29643	0.578617	-1.61178	Gm15903	predicted gene 15903
ENSMUSG00000035202	-0.111911	0.3149	-1.5451	Lars2	leucyl-tRNA synthetase, mitochondrial
ENSMUSG00000076258	0.0525301	0.384342	-1.54055	No associated gene
ENSMUSG00000080972	0.4	0.698371	-1.52877	Gm16061	predicted gene 16061
ENSMUSG00000095061	0.150977	0.650963	-1.51126	E030018B13Rik	RIKEN cDNA E030018B13 gene
ENSMUSG00000086721	-0.222206	1.27034	-1.50367	Gm13750	predicted gene 13750
ENSMUSG00000075014	-0.461626	0.473706	-1.49494	Gm10800	predicted gene 10800
ENSMUSG00000077457	0.4	0.716993	-1.49024	Snord65	small nucleolar RNA, C/D box 65
ENSMUSG00000089881	0.2	0.516992	-1.46439	Gm16280	predicted gene 16280
ENSMUSG00000072576	0.0186219	1.03398	-1.44576	Gm16020	predicted gene 16020
ENSMUSG00000085521	-0.0938266	0.391872	-1.44286	4930526A20Rik	RIKEN cDNA 4930526A20 gene
ENSMUSG00000048644	-0.144632	0.259842	-1.43928	Ctxn1	cortexin 1
ENSMUSG00000084077	0.2	0.550978	-1.43399	Gm11952	predicted gene 11952
ENSMUSG00000076855	-0.166015	0.4	-1.4	Trav16	T cell receptor alpha variable 16
ENSMUSG00000027359	-0.297085	0.478463	-1.39546	Slc27a2	solute carrier family 27 (fatty acid transporter), member 2
ENSMUSG00000048502	-0.363115	0.912448	-1.36276	Duxbl1	double homeobox B-like 1
ENSMUSG00000076135	-0.778798	0.206118	-1.35871	No associated gene
ENSMUSG00000081350	-0.361471	1.03398	-1.35098	Gm5388	predicted gene 5388
ENSMUSG00000089199	-0.116992	0.633985	-1.34739	No associated gene
ENSMUSG00000080718	-0.185922	0.708864	-1.34367	Gm8019	predicted gene 8019
ENSMUSG00000028109	-0.2	0.2	-1.34285	Hormad1	HORMA domain containing 1
ENSMUSG00000045999	-0.0679259	0.232463	-1.31847	No associated gene
ENSMUSG00000097863	0.316993	0.781378	-1.31699	1010001B22Rik	RIKEN cDNA 1010001B22 gene
ENSMUSG00000081359	0.2	0.664386	-1.31699	Cox20b	cytochrome c oxidase assembly protein 20B
ENSMUSG00000093967	-0.716993	0.516992	-1.31699	No associated gene
ENSMUSG00000082218	-0.0830075	0.335614	-1.31699	Gm13602	predicted gene 13602
ENSMUSG00000070891	-0.264386	0.283008	-1.31699	Gm12689	predicted gene 12689
ENSMUSG00000072675	-0.257901	0.878463	-1.31245	Duxbl2	double homeobox B-like 2
ENSMUSG00000082634	-0.161471	0.449022	-1.30886	Gm12900	predicted gene 12900
ENSMUSG00000072672	-0.115707	0.975549	-1.29837	Duxbl3	double homeobox B-like 3
ENSMUSG00000081070	0.2	0.630401	-1.29024	Gm13181	predicted gene 13181
ENSMUSG00000024059	-0.311793	0.617728	-1.29024	Clip4	CAP-GLY domain containing linker protein family, member 4
ENSMUSG00000076911	-0.371964	0.814967	-1.28659	Traj18	T cell receptor alpha joining 18
ENSMUSG00000045102	-0.71121	0.413543	-1.28594	Poln	DNA polymerase N
ENSMUSG00000097914	-0.349692	0.347393	-1.27846	Gm26838	predicted gene, 26838
ENSMUSG00000084611	-0.20102	0.422206	-1.27699	No associated gene
ENSMUSG00000082855	-0.230401	0.384963	-1.26439	Gm14537	predicted gene 14537
ENSMUSG00000098178	-0.119739	0.270821	-1.25677	No associated gene
ENSMUSG00000056973	-0.32913	0.369599	-1.23764	Ces1d	carboxylesterase 1D
ENSMUSG00000081473	-0.712876	0.297896	-1.23716	Gm4853	predicted pseudogene 4853
ENSMUSG00000064624	-0.498371	0.464386	-1.23399	Gm22305	predicted gene, 22305
ENSMUSG00000024905	-0.033985	0.152592	-1.23399	Tesmin	testis expressed metallothionein like
ENSMUSG00000082248	-0.0830075	0.633985	-1.2	Gm13161	predicted gene 13161
ENSMUSG00000071332	-0.113408	0.252607	-1.2	E230015B07Rik	RIKEN cDNA E230015B07 gene
ENSMUSG00000085614	-0.102915	0.169599	-1.2	1700123M08Rik	RIKEN cDNA 1700123M08 gene
ENSMUSG00000097187	-0.166015	0.135614	-1.2	Gm19426	predicted gene, 19426
ENSMUSG00000048029	0.316993	0.950978	-1.19546	Eno4	enolase 4
ENSMUSG00000084072	-0.516992	0.864386	-1.19546	Gm11285	predicted gene 11285
ENSMUSG00000081668	-0.252607	0.483007	-1.19187	Gm7869	predicted gene 7869
ENSMUSG00000045232	0.316993	0.842113	-1.18496	Rln3	relaxin 3
ENSMUSG00000082196	0.038529	0.445764	-1.18213	Gm14231	predicted gene 14231
ENSMUSG00000084562	-0.698371	0.561471	-1.18138	No associated gene
ENSMUSG00000064960	-0.658556	0.550978	-1.18138	No associated gene
ENSMUSG00000059412	-0.931166	0.58911	-1.17644	Fxyd2	FXYD domain-containing ion transport regulator 2
ENSMUSG00000081418	-0.0216754	0.781378	-1.15828	Gm14830	predicted gene 14830
ENSMUSG00000022548	-0.0081284	0.656257	-1.15693	Apod	apolipoprotein D
ENSMUSG00000036560	-0.0199071	0.553343	-1.15627	Lgi4	leucine-rich repeat LGI family, member 4
ENSMUSG00000092455	-0.595456	0.444478	-1.15627	Gm20456	predicted gene 20456
ENSMUSG00000098531	0	0.316993	-1.15098	Mir7041	microRNA 7041
ENSMUSG00000081974	0.152592	0.669585	-1.14919	Gm11960	predicted gene 11960
ENSMUSG00000020407	-0.107343	0.583749	-1.14009	Upp1	uridine phosphorylase 1
ENSMUSG00000089239	0.316993	0.981378	-1.13561	Gm22200	predicted gene, 22200
ENSMUSG00000042251	0.335614	0.716993	-1.13561	Pm20d1	peptidase M20 domain containing 1
ENSMUSG00000092985	-0.166015	1.01536	-1.13236	Mir378b	microRNA 378b
ENSMUSG00000036330	0.116992	1.04741	-1.13107	Slc18a1	solute carrier family 18 (vesicular monoamine), member 1
ENSMUSG00000084800	-0.547393	0.928771	-1.12877	Gm12205	predicted gene 12205
ENSMUSG00000091462	0.0526069	0.686592	-1.12877	Gm17084	predicted gene 17084
ENSMUSG00000019987	-0.239279	0.716458	-1.12041	Arg1	arginase, liver
ENSMUSG00000058186	-0.0631004	0.281532	-1.11772	Zfp980	zinc finger protein 980
ENSMUSG00000088108	-0.316993	1.15098	-1.11699	Snora47	small nucleolar RNA, H/ACA box 47
ENSMUSG00000089997	-0.116992	0.750977	-1.11699	Cfap92	cilia and flagella associated protein 92
ENSMUSG00000095297	0	0.6	-1.11699	No associated gene
ENSMUSG00000096567	-0.316993	0.547393	-1.11699	No associated gene
ENSMUSG00000094845	0.147393	0.516992	-1.11699	Tmem95	transmembrane protein 95
ENSMUSG00000043410	-0.829205	0.336365	-1.11617	Hfm1	HFM1, ATP-dependent DNA helicase homolog
ENSMUSG00000049246	0.155522	0.381378	-1.11341	Hspe1-ps2	heat shock protein 1 (chaperonin 10), pseudogene 2
ENSMUSG00000086589	-0.155522	0.66797	-1.11245	Gm12915	predicted gene 12915
ENSMUSG00000088615	-0.528771	0.244478	-1.11245	No associated gene
ENSMUSG00000097679	-0.438577	0.243862	-1.11203	Rps19-ps5	ribosomal protein S19, pseudogene 5
ENSMUSG00000026228	-0.664386	0.214078	-1.11015	Htr2b	5-hydroxytryptamine (serotonin) receptor 2B
ENSMUSG00000072673	-0.512686	0.185706	-1.10992	Gm10392	predicted gene 10392
ENSMUSG00000097179	-0.13107	0.383677	-1.10886	No associated gene
ENSMUSG00000003665	-0.2	0.147393	-1.10596	Has1	hyaluronan synthase 1
ENSMUSG00000013523	-0.12742	1.06809	-1.10067	Bcas1	brain enriched myelin associated protein 1
ENSMUSG00000046338	-0.328309	0.129785	-1.09844	Gpat2	glycerol-3-phosphate acyltransferase 2, mitochondrial
ENSMUSG00000060621	0.445764	1.07034	-1.09837	Nkpd1	NTPase, KAP family P-loop domain containing 1
ENSMUSG00000096553	-0.716993	0.664386	-1.09837	Gm10097	predicted gene 10097
ENSMUSG00000088456	-0.0830075	0.433985	-1.09837	No associated gene
ENSMUSG00000034107	-0.297085	0.864386	-1.09479	Ano7	anoctamin 7
ENSMUSG00000048424	-0.716993	0.283008	-1.0935	Ranbp3l	RAN binding protein 3-like
ENSMUSG00000089542	-0.100192	0.205199	-1.09024	Gm25835	predicted gene, 25835
ENSMUSG00000097823	-0.0918863	0.638529	-1.08659	Gm16701	predicted gene, 16701
ENSMUSG00000081572	-0.130536	0.301822	-1.08146	Gm14138	predicted gene 14138
ENSMUSG00000020940	-0.0643856	0.4	-1.07846	Efcab15	EF-hand calcium binding domain 15
ENSMUSG00000088230	-0.214078	0.245764	-1.07846	No associated gene
ENSMUSG00000090236	-0.038529	0.135614	-1.06567	Car15	carbonic anhydrase 15
ENSMUSG00000091400	-0.414078	1.98496	-1.06439	Gm6356	predicted gene 6356
ENSMUSG00000056328	-0.316993	0.252607	-1.06439	Myh1	myosin, heavy polypeptide 1, skeletal muscle, adult
ENSMUSG00000079965	-0.708864	0.478463	-1.0631	Gm14853	predicted gene 14853
ENSMUSG00000061863	0.0643856	0.761471	-1.05856	Gm6822	predicted pseudogene 6822
ENSMUSG00000076483	0.0878771	0.278463	-1.05856	Trbj1-1	T cell receptor beta joining 1-1
ENSMUSG00000085467	-0.471229	0.17325	-1.05626	Gm11842	predicted gene 11842
ENSMUSG00000083693	0.0970854	0.510508	-1.04806	Gm11971	predicted gene 11971
ENSMUSG00000078380	-0.411779	0.308864	-1.04576	Gm6096	predicted gene 6096
ENSMUSG00000031026	-0.0830075	0.166015	-1.04576	Trim66	tripartite motif-containing 66
ENSMUSG00000073569	0	0.154987	-1.04576	Gm10540	predicted gene 10540
ENSMUSG00000082361	-0.0437281	0.0771782	-1.04523	Btc	betacellulin, epidermal growth factor family member
ENSMUSG00000054966	-0.433985	0.283008	-1.04448	Lmntd1	lamin tail domain containing 1
ENSMUSG00000083950	-0.116992	1.65984	-1.03398	Gm14466	predicted gene 14466
ENSMUSG00000041608	0.0830075	0.516992	-1.03398	Entpd3	ectonucleoside triphosphate diphosphohydrolase 3
ENSMUSG00000065799	-0.191872	0.308864	-1.03398	Gm25517	predicted gene, 25517
ENSMUSG00000050074	-0.4	0.233985	-1.03398	Spink8	serine peptidase inhibitor, Kazal type 8
ENSMUSG00000033967	-0.169599	0.157887	-1.02714	Rnf225	ring finger protein 225
ENSMUSG00000088857	0.135614	1.27846	-1.02586	Gm24726	predicted gene, 24726
ENSMUSG00000032080	-1.05668	0.66797	-1.01984	Apoa4	apolipoprotein A-IV
ENSMUSG00000009356	-0.0526069	0.886592	-1.01536	Lpo	lactoperoxidase
ENSMUSG00000038508	-0.361471	0.4	-1.01408	Gdf15	growth differentiation factor 15
ENSMUSG00000058567	-0.398385	0.577794	-1.0119	Gm2531	predicted gene 2531
ENSMUSG00000021986	-0.252607	0.633985	-1.01178	Amer2	APC membrane recruitment 2
ENSMUSG00000096108	0.0294081	0.344992	-1.00965	Ighv11-2	immunoglobulin heavy variable V11-2
ENSMUSG00000076839	-0.264386	0.373381	-1.00888	Trav13-1	T cell receptor alpha variable 13-1
ENSMUSG00000099024	-0.366015	0.347393	-1.00595	No associated gene
ENSMUSG00000082922	-0.392695	0.2	-1.00075	Gm6939	predicted gene 6939
ENSMUSG00000029576	-0.716993	0.864386	-1	Radil	Ras association and DIL domains
ENSMUSG00000030584	-0.0830075	0.692541	-1	Dpf1	double PHD fingers 1
ENSMUSG00000084603	-0.57035	0.528771	-1	No associated gene
ENSMUSG00000083019	-0.111043	0.424571	-1	Gm6222	predicted pseudogene 6222
ENSMUSG00000052026	-0.2	0.4	-1	Slc6a7	solute carrier family 6 (neurotransmitter transporter, L-proline), member 7
ENSMUSG00000026417	-0.033935	0.38109	-1	Pigr	polymeric immunoglobulin receptor
ENSMUSG00000078251	-0.6	0.316993	-1	Gm16487	predicted gene 16487
ENSMUSG00000081656	-0.556272	0.428786	-0.997851	Gm11246	predicted gene 11246
ENSMUSG00000086069	-0.597635	0.65708	-0.992695	Gm13708	predicted gene 13708
ENSMUSG00000087703	-0.759106	0.395595	-0.991872	Gm15650	predicted gene 15650
ENSMUSG00000064371	-0.233985	0.0830075	-0.98911	mt-Tt	mitochondrially encoded tRNA threonine
ENSMUSG00000082066	-0.0526069	0.791872	-0.987328	Gm13904	predicted gene 13904
ENSMUSG00000065406	-0.898371	0.761471	-0.981378	Mirlet7i	microRNA let7i
ENSMUSG00000097840	-0.366015	0.750977	-0.981378	Gm26756	predicted gene, 26756
ENSMUSG00000065732	-0.770489	0.569599	-0.981378	Gm24492	predicted gene, 24492
ENSMUSG00000078289	-0.516992	0.464386	-0.981378	Gm10923	predicted gene 10923
ENSMUSG00000042800	0.147393	0.433985	-0.981378	Spata46	spermatogenesis associated 46
ENSMUSG00000052631	-0.316993	0.4	-0.981378	Sh2d6	SH2 domain containing 6
ENSMUSG00000031919	-0.105214	0.377794	-0.981378	Tmed6	transmembrane p24 trafficking protein 6
ENSMUSG00000036805	-0.249023	0.369599	-0.981378	Noxa1	NADPH oxidase activator 1
ENSMUSG00000068600	-0.781378	0.347393	-0.981378	Gml2	glycosylphosphatidylinositol anchored molecule like 2
ENSMUSG00000076495	-0.550978	0.328771	-0.981378	Trbj2-4	T cell receptor beta joining 2-4
ENSMUSG00000032017	-0.473264	0.248063	-0.981378	Grik4	glutamate receptor, ionotropic, kainate 4
ENSMUSG00000043999	0	0.2	-0.981378	Gpr75	G protein-coupled receptor 75
ENSMUSG00000063388	-0.278463	1.00953	-0.969599	BC023105	cDNA sequence BC023105
ENSMUSG00000082049	0.191872	0.761471	-0.969599	Gm12105	predicted gene 12105
ENSMUSG00000063446	-0.105214	0.386577	-0.969599	Plppr1	phospholipid phosphatase related 1
ENSMUSG00000090075	-0.830401	0.316993	-0.969599	Gm16251	predicted gene 16251
ENSMUSG00000089806	0.0666847	0.340484	-0.964659	Gm16570	predicted gene 16570
ENSMUSG00000044997	-0.539265	0.671979	-0.961471	E130304I02Rik	RIKEN cDNA E130304I02 gene
ENSMUSG00000083100	-0.494786	0.2	-0.961471	Gm6044	predicted gene 6044
ENSMUSG00000085957	-0.135614	0.535614	-0.959172	Syna	syncytin a
ENSMUSG00000021874	-0.359172	0.825857	-0.956927	4933413J09Rik	RIKEN cDNA 4933413J09 gene
ENSMUSG00000035364	0.144493	0.6631	-0.956927	No associated gene
ENSMUSG00000098198	-0.136365	0.516037	-0.95347	Gm9169	predicted gene 9169
ENSMUSG00000093908	0.0643856	0.298371	-0.950978	Gm5784	predicted gene 5784
ENSMUSG00000085223	-0.116992	0.2	-0.950978	Gm11210	predicted gene 11210
ENSMUSG00000024173	-0.6	0.2	-0.950978	Tpsab1	tryptase alpha/beta 1
ENSMUSG00000078607	-0.202761	0.0830075	-0.950978	1810010H24Rik	RIKEN cDNA 1810010H24 gene
ENSMUSG00000082676	-0.385922	0.8	-0.947393	Gm11843	predicted gene 11843
ENSMUSG00000076873	-0.833985	0.569599	-0.947393	Trdv5	T cell receptor delta variable 5
ENSMUSG00000026443	0	0.833985	-0.942849	Lrrn2	leucine rich repeat protein 2, neuronal
ENSMUSG00000046637	-0.283008	0.633985	-0.942849	Ttc34	tetratricopeptide repeat domain 34
ENSMUSG00000023052	-0.586709	0.519991	-0.942519	Npff	neuropeptide FF-amide peptide precursor
ENSMUSG00000085058	-0.0579013	0.425106	-0.93702	8030453O22Rik	RIKEN cDNA 8030453O22 gene
ENSMUSG00000024935	-1.04806	0.833985	-0.93107	Slc1a1	solute carrier family 1 (neuronal/epithelial high affinity glutamate transporter, system Xag), member 1
ENSMUSG00000086881	-0.113408	1.18138	-0.928771	Gm13594	predicted gene 13594
ENSMUSG00000060572	-0.177794	0.444478	-0.928771	Mfap2	microfibrillar-associated protein 2
ENSMUSG00000081159	0.0372405	0.497085	-0.928256	Gm6023	predicted gene 6023
ENSMUSG00000064492	-0.4	0.508864	-0.927486	Gm22060	predicted gene, 22060
ENSMUSG00000097873	0.4	0.916992	-0.925871	No associated gene
ENSMUSG00000036551	-0.650308	0.401285	-0.925871	Akap14	A kinase (PRKA) anchor protein 14
ENSMUSG00000021187	-0.781378	0.625857	-0.920643	Tc2n	tandem C2 domains, nuclear
ENSMUSG00000075588	-0.0991938	0.416598	-0.920181	Hoxb2	homeobox B2
ENSMUSG00000085958	-0.825857	1.32877	-0.916992	A930019D19Rik	RIKEN cDNA A930019D19 gene
ENSMUSG00000074738	-0.116992	0.8	-0.916992	Fndc10	fibronectin type III domain containing 10
ENSMUSG00000080823	0.238529	0.690242	-0.916992	Atp5l-ps2	ATP synthase, H+ transporting, mitochondrial F0 complex, subunit G, pseudogene 2
ENSMUSG00000018698	0	0.433985	-0.916992	Lhx1	LIM homeobox protein 1
ENSMUSG00000097313	-0.252607	0.294786	-0.916992	Gm26569	predicted gene, 26569
ENSMUSG00000008932	-0.516992	0.283008	-0.916992	Slc1a7	solute carrier family 1 (glutamate transporter), member 7
ENSMUSG00000087492	-0.00454402	0.233985	-0.916992	Gm15700	predicted gene 15700
ENSMUSG00000026259	-0.116992	0.116992	-0.916992	Ngef	neuronal guanine nucleotide exchange factor
ENSMUSG00000068154	-0.364681	0.45082	-0.915517	Insm1	insulinoma-associated 1
ENSMUSG00000057092	0.0335889	0.214078	-0.914814	Fxyd3	FXYD domain-containing ion transport regulator 3
ENSMUSG00000020017	-0.339196	0.226106	-0.913269	Hal	histidine ammonia lyase
ENSMUSG00000097817	-0.581378	0.316993	-0.908864	Gm26810	predicted gene, 26810
ENSMUSG00000096474	-0.177193	0.666681	-0.9081	Gm5561	predicted gene 5561
ENSMUSG00000039824	-0.233638	0.123765	-0.907832	Myl6b	myosin, light polypeptide 6B
ENSMUSG00000088323	-0.316993	0.2	-0.906499	Gm25663	predicted gene, 25663
ENSMUSG00000085897	-0.489876	0.344632	-0.905044	Gm11604	predicted gene 11604
ENSMUSG00000003872	-0.419907	0.2	-0.898371	Lin7b	lin-7 homolog B, crumbs cell polarity complex component
ENSMUSG00000082476	0.140088	0.374746	-0.89736	Gm12242	predicted gene 12242
ENSMUSG00000095178	-0.376508	0.27501	-0.894786	No associated gene
ENSMUSG00000065126	-0.0496775	0.688115	-0.894491	Snord104	small nucleolar RNA, C/D box 104
ENSMUSG00000081673	-0.160412	0.243894	-0.892715	Gm14794	predicted gene 14794
ENSMUSG00000091732	-0.684293	0.411779	-0.891886	Gm17541	predicted gene, 17541
ENSMUSG00000081223	-0.244478	1.043	-0.890531	Gm12247	predicted gene 12247
ENSMUSG00000082755	-0.0178281	0.248202	-0.887592	Gm8692	predicted gene 8692
ENSMUSG00000053957	-0.283758	0.195595	-0.883758	Gm12474	predicted gene 12474
ENSMUSG00000059064	0.151385	0.431105	-0.883282	Gm10059	predicted pseudogene 10059
ENSMUSG00000030981	-0.464386	0.350977	-0.883007	Mmp21	matrix metallopeptidase 21
ENSMUSG00000094286	0.171332	0.4678	-0.882689	Gm12424	predicted gene 12424
ENSMUSG00000084772	-0.0830075	0.8	-0.878463	Gm15473	predicted gene 15473
ENSMUSG00000097271	-0.716993	0.615363	-0.878463	Gm9903	predicted gene 9903
ENSMUSG00000097134	-0.553107	0.505214	-0.878463	1110002J07Rik	RIKEN cDNA 1110002J07 gene
ENSMUSG00000094877	0.116992	0.433985	-0.878463	Trav3n-3	T cell receptor alpha variable 3N-3
ENSMUSG00000083449	-0.320716	0.45914	-0.877334	Gm13487	predicted gene 13487
ENSMUSG00000087794	0.2	0.516992	-0.876164	No associated gene
ENSMUSG00000061669	-0.00964744	0.344788	-0.875915	Rpl34-ps2	ribosomal protein L34, pseudogene 2
ENSMUSG00000076454	-0.24865	0.173657	-0.874706	Mir762	microRNA 762
ENSMUSG00000096438	-0.614078	0.581378	-0.870503	Gapdh-ps15	glyceraldehyde-3-phosphate dehydrogenase, pseudogene 15
ENSMUSG00000029001	-0.214078	0.511043	-0.86893	Fbxo44	F-box protein 44
ENSMUSG00000096623	-0.0868199	0.385042	-0.865891	No associated gene
ENSMUSG00000092257	0.233985	1.12877	-0.864386	Gm2308	predicted gene 2308
ENSMUSG00000082524	-0.147393	0.981378	-0.864386	Gm6272	predicted pseudogene 6272
ENSMUSG00000082478	-0.316993	0.6	-0.864386	Gm11619	predicted gene 11619
ENSMUSG00000099002	-0.747393	0.561471	-0.864386	No associated gene
ENSMUSG00000032899	0.0830075	0.433985	-0.864386	Styk1	serine/threonine/tyrosine kinase 1
ENSMUSG00000096393	0.038529	0.4	-0.864386	Fam240a	family with sequence similarity 240 member A
ENSMUSG00000098240	-0.878463	0.4	-0.864386	Gm4575	predicted gene 4575
ENSMUSG00000085419	-0.516992	0.316993	-0.864386	Gm11734	predicted gene 11734
ENSMUSG00000004821	-0.2	0.2	-0.864386	Tmed11	transmembrane p24 trafficking protein 11
ENSMUSG00000061462	-0.632396	0.425019	-0.86303	Obscn	obscurin, cytoskeletal calmodulin and titin-interacting RhoGEF
ENSMUSG00000018919	-0.452702	0.702915	-0.859842	Tm4sf5	transmembrane 4 superfamily member 5
ENSMUSG00000029279	-0.277808	0.269968	-0.858321	Brdt	bromodomain, testis-specific
ENSMUSG00000086537	-0.0312238	0.516596	-0.857831	Gnasas1	GNAS antisense RNA 1
ENSMUSG00000064390	-0.277058	0.168776	-0.85708	Snord73b	small nucleolar RNA, C/D box U73B
ENSMUSG00000047293	0.319099	0.974894	-0.856942	Gpr15	G protein-coupled receptor 15
ENSMUSG00000085099	-0.435009	0.564986	-0.855044	Gm16288	predicted gene 16288
ENSMUSG00000096883	-0.241135	0.559343	-0.853357	Shisa8	shisa family member 8
ENSMUSG00000080979	-0.716993	0.366015	-0.852607	Gm13675	predicted gene 13675
ENSMUSG00000095199	0.0134228	0.602929	-0.850428	Zfp967	zinc finger protein 967
ENSMUSG00000058661	-0.0920251	0.316993	-0.847503	Gm10046	predicted gene 10046
ENSMUSG00000083344	-0.406511	0.757528	-0.846807	Gm7363	predicted gene 7363
ENSMUSG00000098447	-0.516992	0.449022	-0.846587	Gm27184	predicted gene 27184
ENSMUSG00000026639	-0.0538533	0.372318	-0.846417	Lamb3	laminin, beta 3
ENSMUSG00000076891	-0.433985	0.516992	-0.845764	Traj39	T cell receptor alpha joining 39
ENSMUSG00000085807	-0.561471	0.516992	-0.845764	Ube4bos2	ubiquitination factor E4B, opposite strand 2
ENSMUSG00000076846	-0.90558	0.357879	-0.844705	Trav13-2	T cell receptor alpha variable 13-2
ENSMUSG00000044303	-0.0836625	0.674879	-0.844478	Cdkn2a	cyclin dependent kinase inhibitor 2A
ENSMUSG00000060209	-0.437744	0.325927	-0.84168	No associated gene
ENSMUSG00000082743	-0.4	0.581378	-0.839934	Gm12988	predicted gene 12988
ENSMUSG00000069806	-0.562614	0.269585	-0.838459	Cacng7	calcium channel, voltage-dependent, gamma subunit 7
ENSMUSG00000006435	-0.233589	0.259475	-0.8374	Neurl1a	neuralized E3 ubiquitin protein ligase 1A
ENSMUSG00000081750	0.316993	0.898371	-0.833985	Gm4995	predicted pseudogene 4995
ENSMUSG00000080937	-0.516992	0.833985	-0.833985	Gm13510	predicted gene 13510
ENSMUSG00000055301	0.233985	0.644478	-0.833985	Adh7	alcohol dehydrogenase 7 (class IV), mu or sigma polypeptide
ENSMUSG00000020878	0	0.6	-0.833985	Lrrc46	leucine rich repeat containing 46
ENSMUSG00000042216	-0.116992	0.516992	-0.833985	Sgsm1	small G protein signaling modulator 1
ENSMUSG00000052551	-0.366015	0.483007	-0.833985	Adarb2	adenosine deaminase, RNA-specific, B2
ENSMUSG00000095643	0.2	0.483007	-0.833985	Trav13d-3	T cell receptor alpha variable 13D-3
ENSMUSG00000014609	0	0.4	-0.833985	Chrne	cholinergic receptor, nicotinic, epsilon polypeptide
ENSMUSG00000021768	0.0830075	0.369599	-0.833985	Dusp13	dual specificity phosphatase 13
ENSMUSG00000098355	-0.483007	0.349692	-0.833985	No associated gene
ENSMUSG00000078991	-0.664386	0.316993	-0.833985	No associated gene
ENSMUSG00000091393	0	0.316993	-0.833985	5330438I03Rik	RIKEN cDNA 5330438I03 gene
ENSMUSG00000075046	-0.550978	0.316993	-0.833985	Duxf3	double homeobox family member 3
ENSMUSG00000082273	-0.0830075	0.252607	-0.833985	No associated gene
ENSMUSG00000021032	-0.316993	0.2	-0.833985	Ngb	neuroglobin
ENSMUSG00000086801	-0.0713242	0.165194	-0.831056	Gm15943	predicted gene 15943
ENSMUSG00000083649	-0.674879	0.888957	-0.830401	Rasl2-9	RAS-like, family 2, locus 9
ENSMUSG00000084265	-0.389384	0.158754	-0.829405	Gm14541	predicted gene 14541
ENSMUSG00000045746	-0.438459	0.414828	-0.828786	B230317F23Rik	RIKEN cDNA B230317F23 gene
ENSMUSG00000097487	-0.111746	0.518777	-0.82862	Ptges3l	prostaglandin E synthase 3 like
ENSMUSG00000082625	0.038529	0.242113	-0.828036	Gm15204	predicted gene 15204
ENSMUSG00000074412	-0.281029	0.378407	-0.827358	Gm10689	predicted gene 10689
ENSMUSG00000056258	-0.608879	0.611779	-0.825857	Kcnq3	potassium voltage-gated channel, subfamily Q, member 3
ENSMUSG00000082729	-0.195456	0.520181	-0.825857	Gm14845	predicted gene 14845
ENSMUSG00000090637	-0.633985	0.225857	-0.825857	Gm6189	predicted gene 6189
ENSMUSG00000082976	0.157581	0.8055	-0.825813	Gm15056	predicted gene 15056
ENSMUSG00000030922	-0.313852	0.429215	-0.823539	Lyrm1	LYR motif containing 1
ENSMUSG00000085844	0.161471	0.456257	-0.819907	Gm11690	predicted gene 11690
ENSMUSG00000094955	0.0826106	0.333156	-0.819793	Gm3699	predicted gene 3699
ENSMUSG00000043807	-0.890242	0.296264	-0.816978	Ly6g5b	lymphocyte antigen 6 complex, locus G5B
ENSMUSG00000081504	-0.185922	0.760936	-0.815363	Gm12508	predicted gene 12508
ENSMUSG00000038415	-0.433985	0.4	-0.814078	Foxq1	forkhead box Q1
ENSMUSG00000032373	-0.18482	0.305964	-0.814078	Car12	carbonic anhydrase 12
ENSMUSG00000024500	-0.411779	0.233985	-0.814078	Ppp2r2b	protein phosphatase 2, regulatory subunit B, beta
ENSMUSG00000075270	-0.340719	0.674573	-0.813423	Pde11a	phosphodiesterase 11A
ENSMUSG00000043068	-0.508864	1.03909	-0.813087	Fam89a	family with sequence similarity 89, member A
ENSMUSG00000043873	-0.507487	0.419403	-0.813067	Chil5	chitinase-like 5
ENSMUSG00000083555	0.116992	0.728771	-0.811779	Gm12035	predicted gene 12035
ENSMUSG00000093671	-0.233985	0.4	-0.811779	Gm20656	predicted gene 20656
ENSMUSG00000035435	-0.418622	0.350977	-0.811779	Abca17	ATP-binding cassette, sub-family A (ABC1), member 17
ENSMUSG00000061272	-0.145538	0.414948	-0.810505	Gm14173	predicted gene 14173
ENSMUSG00000094089	-0.173472	0.216706	-0.803265	No associated gene
ENSMUSG00000085207	-0.488302	0.191872	-0.802178	Gm11767	predicted gene 11767
ENSMUSG00000086789	-0.716993	1.31699	-0.8	Lyrm7os	LYR motif containing 7, opposite strand
ENSMUSG00000082663	-0.516992	0.833985	-0.8	Trav13-3	T cell receptor alpha variable 13-3
ENSMUSG00000031849	-0.181378	0.756927	-0.8	Comp	cartilage oligomeric matrix protein
ENSMUSG00000082957	0.264386	0.716993	-0.8	Gm15303	predicted gene 15303
ENSMUSG00000077733	-0.6	0.716993	-0.8	Gm23608	predicted gene, 23608
ENSMUSG00000081212	0.0830075	0.581378	-0.8	Gm6964	predicted gene 6964
ENSMUSG00000096086	-0.833985	0.561471	-0.8	Gm4761	predicted gene 4761
ENSMUSG00000079105	0.205949	0.550978	-0.8	C7	complement component 7
ENSMUSG00000047854	-0.433985	0.547393	-0.8	Stx19	syntaxin 19
ENSMUSG00000046834	-0.316993	0.4	-0.8	Krt1	keratin 1
ENSMUSG00000031853	-0.2	0.4	-0.8	Map3k21	mitogen-activated protein kinase kinase kinase 21
ENSMUSG00000083360	0	0.316993	-0.8	No associated gene
ENSMUSG00000090685	-0.433985	0.316993	-0.8	Atp6v1fnb	Atp6v1f neighbor
ENSMUSG00000064580	-0.2	0.316993	-0.8	Gm25134	predicted gene, 25134
ENSMUSG00000037446	-0.283008	0.316993	-0.8	Tulp1	tubby like protein 1
ENSMUSG00000024907	0	0.283008	-0.8	Gal	galanin and GMAP prepropeptide
ENSMUSG00000045662	-0.135614	0.264386	-0.8	Henmt1	HEN1 methyltransferase homolog 1 (Arabidopsis)
ENSMUSG00000021944	-0.233985	0.238529	-0.8	Gata4	GATA binding protein 4
ENSMUSG00000000308	-0.244478	0.202299	-0.8	Ckmt1	creatine kinase, mitochondrial 1, ubiquitous
ENSMUSG00000065847	0	0.2	-0.8	Gm25188	predicted gene, 25188
ENSMUSG00000097987	-0.156054	0.171659	-0.798782	Gm17786	predicted gene, 17786
ENSMUSG00000082057	-0.522192	0.777794	-0.798644	Gm15789	predicted gene 15789
ENSMUSG00000097062	-0.121858	0.184566	-0.797168	No associated gene
ENSMUSG00000089944	-0.284761	0.131701	-0.795763	No associated gene
ENSMUSG00000076038	-0.202002	0.470608	-0.79496	No associated gene
ENSMUSG00000090223	-0.857234	0.657305	-0.7942	Pcp4	Purkinje cell protein 4
ENSMUSG00000083326	0.248643	0.729284	-0.79403	Rpl38-ps1	ribosomal protein L38, pseudogene 1
ENSMUSG00000073234	-0.932356	0.825857	-0.789507	Fam237b	family with sequence similarity 237, member B
ENSMUSG00000025020	-0.37325	0.750977	-0.789507	Slit1	slit guidance ligand 1
ENSMUSG00000076901	-0.202365	0.901559	-0.789457	Traj28	T cell receptor alpha joining 28
ENSMUSG00000037735	-0.453863	0.230401	-0.788972	2810032G03Rik	RIKEN cDNA 2810032G03 gene
ENSMUSG00000083033	0.0771782	0.400981	-0.788968	Gm9083	predicted gene 9083
ENSMUSG00000010830	-0.226656	0.365448	-0.788375	Kdelr3	KDEL (Lys-Asp-Glu-Leu) endoplasmic reticulum protein retention receptor 3
ENSMUSG00000035270	-0.503665	0.259946	-0.787751	Impg2	interphotoreceptor matrix proteoglycan 2
ENSMUSG00000050050	-0.108864	0.288068	-0.787496	Ccdc158	coiled-coil domain containing 158
ENSMUSG00000047115	0.0663964	0.523904	-0.784566	Fam221a	family with sequence similarity 221, member A
ENSMUSG00000024411	-0.420514	0.757066	-0.783701	Aqp4	aquaporin 4
ENSMUSG00000076218	-0.266892	0.257474	-0.781824	Mir692-1	microRNA 692-1
ENSMUSG00000084457	0.150977	1.29837	-0.781378	No associated gene
ENSMUSG00000082151	0.233985	0.728771	-0.781378	Gm11810	predicted gene 11810
ENSMUSG00000088475	0.0784635	0.664386	-0.781378	No associated gene
ENSMUSG00000085517	-0.0616245	0.57325	-0.781378	Gm12963	predicted gene 12963
ENSMUSG00000080790	-0.0444785	0.569599	-0.781378	Gm7638	predicted gene 7638
ENSMUSG00000097742	-0.516992	0.550978	-0.781378	Gm26535	predicted gene, 26535
ENSMUSG00000097041	0.0643856	0.430401	-0.781378	Pafah1b1-ps1	platelet-activating factor acetylhydrolase, isoform 1b, beta1 subunit, pseudogene 1
ENSMUSG00000086912	-0.116992	0.4	-0.781378	4930505O20Rik	RIKEN cDNA 4930505O20 gene
ENSMUSG00000061171	-0.4	0.230401	-0.781378	Slc38a11	solute carrier family 38, member 11
ENSMUSG00000080868	-0.316993	0.135614	-0.781378	Gm15745	predicted gene 15745
ENSMUSG00000071181	-0.395456	0.580093	-0.780843	3830408C21Rik	RIKEN cDNA 3830408C21 gene
ENSMUSG00000076478	-0.775549	0.830401	-0.780093	Trbv23	T cell receptor beta, variable V23
ENSMUSG00000065824	0.130139	0.758614	-0.779249	No associated gene
ENSMUSG00000050747	-0.414078	0.580022	-0.775644	Trim15	tripartite motif-containing 15
ENSMUSG00000028845	-0.361471	0.487481	-0.775452	Tekt2	tektin 2
ENSMUSG00000097601	-0.6	0.916992	-0.774894	Gm26660	predicted gene, 26660
ENSMUSG00000031169	-0.461486	0.259912	-0.774894	Porcn	porcupine O-acyltransferase
ENSMUSG00000066626	-0.209803	0.500614	-0.77137	Gm5121	predicted gene 5121
ENSMUSG00000087266	-0.137137	0.441897	-0.770718	Gm15991	predicted gene 15991
ENSMUSG00000092229	-0.516992	0.698371	-0.769599	Gm5977	predicted gene 5977
ENSMUSG00000004791	-0.657901	0.570489	-0.769599	Pgf	placental growth factor
ENSMUSG00000082655	-0.138793	0.342721	-0.769007	Gm7857	predicted gene 7857
ENSMUSG00000065037	-0.0451109	0.527553	-0.768291	No associated gene
ENSMUSG00000087213	-0.16365	0.441945	-0.765876	2810408I11Rik	RIKEN cDNA 2810408I11 gene
ENSMUSG00000057594	-0.112361	0.228934	-0.765768	Arl16	ADP-ribosylation factor-like 16
ENSMUSG00000082836	-0.2	0.283008	-0.761471	Gm13612	predicted gene 13612
ENSMUSG00000074373	-1.07846	0.769599	-0.756927	Gm10680	predicted gene 10680
ENSMUSG00000027718	-0.22771	0.480224	-0.756531	Il21	interleukin 21
ENSMUSG00000080779	-0.302915	0.698371	-0.756272	Gm8731	predicted gene 8731
ENSMUSG00000084881	-0.205294	0.26209	-0.753331	No associated gene
ENSMUSG00000093327	-0.110044	0.368582	-0.752402	Mir5107	microRNA 5107
ENSMUSG00000093862	-0.462139	0.330704	-0.751867	Gm5117	predicted gene 5117
ENSMUSG00000084345	-0.0934491	0.419327	-0.75111	Rpl17-ps4	ribosomal protein L17, pseudogene 4
ENSMUSG00000083834	-0.0526069	1.03169	-0.750977	Gm12577	predicted gene 12577
ENSMUSG00000076867	0.347393	0.864386	-0.750977	Trdv4	T cell receptor delta variable 4
ENSMUSG00000090323	-0.2	0.316993	-0.750977	Gm5263	predicted gene 5263
ENSMUSG00000044916	0.0602688	0.303203	-0.750977	Frey1	Frey regulator of sperm-oocyte fusion 1
ENSMUSG00000022215	0	0.2	-0.750977	Fitm1	fat storage-inducing transmembrane protein 1
ENSMUSG00000026839	-0.2	0.161471	-0.750977	Upp2	uridine phosphorylase 2
ENSMUSG00000082348	-0.6	0.698371	-0.747393	Gm12807	predicted gene 12807
ENSMUSG00000048826	-0.169599	0.686592	-0.747393	Dact2	dishevelled-binding antagonist of beta-catenin 2
ENSMUSG00000024552	0.181378	0.6	-0.747393	Slc14a2	solute carrier family 14 (urea transporter), member 2
ENSMUSG00000020679	-0.233985	0.4	-0.747393	Hnf1b	HNF1 homeobox B
ENSMUSG00000089671	-0.0526069	0.333315	-0.747393	Gm16537	predicted gene 16537
ENSMUSG00000098769	-0.494786	0.316993	-0.747393	Mir8103	microRNA 8103
ENSMUSG00000081740	-0.229568	0.238008	-0.746064	Gm14279	predicted gene 14279
ENSMUSG00000081751	-0.530273	0.481246	-0.74574	Gm14251	predicted gene 14251
ENSMUSG00000069125	-0.399453	0.448707	-0.745505	Rps24-ps2	ribosomal protein S24, pseudogene 2
ENSMUSG00000063875	-0.217335	0.220043	-0.744536	Rps6-ps1	ribosomal protein S6, pseudogene 1
ENSMUSG00000075245	-0.717507	0.584399	-0.74391	Gm6043	predicted gene 6043
ENSMUSG00000079283	0.00717309	0.223061	-0.743302	2310009B15Rik	RIKEN cDNA 2310009B15 gene
ENSMUSG00000084024	-0.00229913	0.4	-0.742849	Gm15937	predicted gene 15937
ENSMUSG00000045201	-0.375549	0.347393	-0.742849	Lrrc3b	leucine rich repeat containing 3B
ENSMUSG00000034161	-0.0580401	0.20075	-0.742849	Scx	scleraxis scleraxis bHLH transcription factor
ENSMUSG00000084960	-0.311043	0.493907	-0.74196	B430010I23Rik	RIKEN cDNA B430010I23 gene
ENSMUSG00000082609	0.099967	0.422939	-0.740632	Gm15464	predicted gene 15464
ENSMUSG00000082082	-0.404841	0.329901	-0.740122	Gm13230	predicted gene 13230
ENSMUSG00000050914	-0.293979	0.217383	-0.739996	Ankrd37	ankyrin repeat domain 37
ENSMUSG00000043644	-0.275298	0.464386	-0.739199	0610009L18Rik	RIKEN cDNA 0610009L18 gene
ENSMUSG00000076545	-0.0432367	0.200334	-0.736066	Igkv4-72	immunoglobulin kappa chain variable 4-72
ENSMUSG00000020870	-0.464386	0.916992	-0.735614	Cdc34b	cell division cycle 34B
ENSMUSG00000014747	-0.30432	0.347393	-0.733435	Ankrd53	ankyrin repeat domain 53
ENSMUSG00000089235	0.000451412	0.452481	-0.733327	Gm23119	predicted gene, 23119
ENSMUSG00000065873	0.108864	0.571844	-0.731821	No associated gene
ENSMUSG00000078898	-0.17625	0.571171	-0.731704	Zfp968	zinc finger protein 968
ENSMUSG00000040287	-0.238529	0.619372	-0.728795	Stac3	SH3 and cysteine rich domain 3
ENSMUSG00000025081	-0.233985	0.4	-0.728771	Tdrd1	tudor domain containing 1
ENSMUSG00000065360	-0.127486	0.166015	-0.728771	Gm24412	predicted gene, 24412
ENSMUSG00000027994	0.0251062	0.527486	-0.725871	Mcub	mitochondrial calcium uniporter dominant negative beta subunit
ENSMUSG00000070667	0.0534961	0.538198	-0.723181	Rpl31-ps10	ribosomal protein L31, pseudogene 10
ENSMUSG00000096995	-0.252607	0.264386	-0.722942	2810029C07Rik	RIKEN cDNA 2810029C07 gene
ENSMUSG00000098813	-0.355522	0.751798	-0.721537	No associated gene
ENSMUSG00000076488	-0.160067	0.150835	-0.720774	Trbj1-6	T cell receptor beta joining 1-6
ENSMUSG00000093739	-0.213707	0.139344	-0.720275	Gm20692	predicted gene 20692
ENSMUSG00000070271	-0.521857	0.364005	-0.719643	Gm13268	predicted gene 13268
ENSMUSG00000071324	-0.405829	0.638486	-0.719266	Armc2	armadillo repeat containing 2
ENSMUSG00000056772	-0.352857	0.512306	-0.719135	Rps6-ps2	ribosomal protein S6, pseudogene 2
ENSMUSG00000028541	0.254288	0.673661	-0.718396	B4galt2	UDP-Gal:betaGlcNAc beta 1,4- galactosyltransferase, polypeptide 2
ENSMUSG00000081871	0.214265	0.569888	-0.718308	Gm11488	predicted gene 11488
ENSMUSG00000091994	-0.67436	0.486759	-0.717148	E130317F20Rik	RIKEN cDNA E130317F20 gene
ENSMUSG00000097298	-0.264386	0.981378	-0.716993	No associated gene
ENSMUSG00000082234	0.169599	0.916992	-0.716993	Gm16221	predicted gene 16221
ENSMUSG00000085165	0.0712288	0.86797	-0.716993	Gm12089	predicted gene 12089
ENSMUSG00000002190	-0.6	0.833985	-0.716993	Clgn	calmegin
ENSMUSG00000080711	0.2	0.8	-0.716993	Gm11686	predicted gene 11686
ENSMUSG00000084422	0.2	0.77325	-0.716993	No associated gene
ENSMUSG00000075267	0.116992	0.728771	-0.716993	Pjvk	pejvakin
ENSMUSG00000097523	-0.302915	0.716993	-0.716993	1700022N22Rik	RIKEN cDNA 1700022N22 gene
ENSMUSG00000024041	-0.189507	0.716993	-0.716993	Cryaa	crystallin, alpha A
ENSMUSG00000077367	0	0.716993	-0.716993	Gm23483	predicted gene, 23483
ENSMUSG00000074345	0	0.633985	-0.716993	Tnfaip8l3	tumor necrosis factor, alpha-induced protein 8-like 3
ENSMUSG00000086449	-0.283008	0.6	-0.716993	9030204H09Rik	RIKEN cDNA 9030204H09 gene
ENSMUSG00000035951	0	0.6	-0.716993	Ascl3	achaete-scute family bHLH transcription factor 3
ENSMUSG00000046219	-0.516992	0.6	-0.716993	C230012O17Rik	RIKEN cDNA C230012O17 gene
ENSMUSG00000095379	0.244478	0.581378	-0.716993	No associated gene
ENSMUSG00000093813	-0.233985	0.57325	-0.716993	Trav9n-2	T cell receptor alpha variable 9N-2
ENSMUSG00000051703	0.0708699	0.546572	-0.716993	Tmem198	transmembrane protein 198
ENSMUSG00000082323	0.116992	0.516992	-0.716993	Gm15314	predicted gene 15314
ENSMUSG00000076439	0	0.516992	-0.716993	Mog	myelin oligodendrocyte glycoprotein
ENSMUSG00000029055	0	0.516992	-0.716993	Plch2	phospholipase C, eta 2
ENSMUSG00000096078	-0.252211	0.485634	-0.716993	Ighv1-62-2	immunoglobulin heavy variable 1-62-2
ENSMUSG00000078640	-0.664386	0.452607	-0.716993	Gm11627	predicted gene 11627
ENSMUSG00000084989	-0.116992	0.433985	-0.716993	Crocc2	ciliary rootlet coiled-coil, rootletin family member 2
ENSMUSG00000047307	-0.316993	0.411779	-0.716993	Pcdhb13	protocadherin beta 13
ENSMUSG00000084885	-0.2	0.4	-0.716993	3010001F23Rik	RIKEN cDNA 3010001F23 gene
ENSMUSG00000097155	-0.483007	0.4	-0.716993	Gm26511	predicted gene, 26511
ENSMUSG00000020713	-0.149692	0.33107	-0.716993	Gh	growth hormone
ENSMUSG00000090159	-0.716993	0.316993	-0.716993	Gm8580	predicted gene 8580
ENSMUSG00000006948	-0.2	0.316993	-0.716993	Klk4	kallikrein related-peptidase 4 (prostase, enamel matrix, prostate)
ENSMUSG00000089742	-0.6	0.283008	-0.716993	Gm15898	predicted gene 15898
ENSMUSG00000047642	-0.244478	0.233985	-0.716993	D930020B18Rik	RIKEN cDNA D930020B18 gene
ENSMUSG00000085837	-0.4	0.233985	-0.716993	Kcnmb4os2	potassium large conductance calcium-activated channel, subfamily M, beta member 4, opposite strand 2
ENSMUSG00000090369	-0.116992	0.2	-0.716993	4933411K16Rik	RIKEN cDNA 4933411K16 gene
ENSMUSG00000081613	-0.2	0.2	-0.716993	Gm12109	predicted gene 12109
ENSMUSG00000083630	-0.516992	0.2	-0.716993	Gm15602	predicted gene 15602
ENSMUSG00000064597	-0.180093	0.2	-0.716993	Gm22299	predicted gene, 22299
ENSMUSG00000056777	-0.2	0.2	-0.716993	Rpl21-ps13	ribosomal protein L21-ps13
ENSMUSG00000081125	-0.4	0.2	-0.716993	Rpl26-ps5	ribosomal protein L26, pseudogene 5
ENSMUSG00000079137	-0.323493	0.219718	-0.712755	Rpl27-ps1	ribosomal protein L27, pseudogene 1
ENSMUSG00000084893	0.134138	0.520577	-0.710875	Hba-ps4	hemoglobin alpha, pseudogene 4
ENSMUSG00000065911	0.194286	0.773835	-0.710851	No associated gene
ENSMUSG00000079146	-0.116992	0.789507	-0.708864	Gm15353	predicted gene 15353
ENSMUSG00000081137	-0.604335	0.692208	-0.708864	BC022960	cDNA sequence BC022960
ENSMUSG00000093953	-0.2	0.2	-0.708864	Trav3d-3	T cell receptor alpha variable 3D-3
ENSMUSG00000049107	-0.215127	0.174073	-0.707579	Ntf3	neurotrophin 3
ENSMUSG00000040883	-0.159391	0.236885	-0.70713	Tmem205	transmembrane protein 205
ENSMUSG00000080932	0.116925	0.459041	-0.707075	Gm10224	predicted pseudogene 10224
ENSMUSG00000045842	-0.176452	0.318563	-0.706769	Tgif2-ps2	TGFB-induced factor homeobox 2, pseudogene 2
ENSMUSG00000095315	-0.687877	0.586673	-0.705214	Zfp1001	zinc finger protein 1001
ENSMUSG00000030037	-0.230401	0.335614	-0.704712	Mrpl53	mitochondrial ribosomal protein L53
ENSMUSG00000098274	-0.235393	0.256854	-0.703992	Rpl24	ribosomal protein L24
ENSMUSG00000027068	-0.0397648	0.362006	-0.701606	Dhrs9	dehydrogenase/reductase (SDR family) member 9
ENSMUSG00000082746	-0.102427	0.289828	-0.701403	Rps12-ps1	ribosomal protein S12, pseudogene 1
ENSMUSG00000017400	-0.237362	0.407672	-0.699031	Stac2	SH3 and cysteine rich domain 2
ENSMUSG00000054034	-0.316993	0.664386	-0.698371	Tceal5	transcription elongation factor A (SII)-like 5
ENSMUSG00000092178	0.116992	0.6	-0.698371	Gm45351	predicted gene 45351
ENSMUSG00000087466	-0.0830075	0.547393	-0.698371	A330041J22Rik	RIKEN cDNA A330041J22 gene
ENSMUSG00000083458	0.072514	0.469195	-0.698371	Gm5510	predicted pseudogene 5510
ENSMUSG00000096149	-0.0267503	0.430401	-0.697085	Trav6-5	T cell receptor alpha variable 6-5
ENSMUSG00000098785	-0.516992	0.410493	-0.697085	Mir6395	microRNA 6395
ENSMUSG00000056219	-0.116992	0.347393	-0.697085	Tmem229b-ps	transmembrane protein 229B, pseudogene
ENSMUSG00000078291	-0.30357	0.349952	-0.696987	Gm3940	predicted gene 3940
ENSMUSG00000074796	-0.274759	0.169352	-0.696842	Slc4a11	solute carrier family 4, sodium bicarbonate transporter-like, member 11
ENSMUSG00000092617	0.0830075	0.347393	-0.694786	Gm8412	predicted gene 8412
ENSMUSG00000091561	-0.291886	0.144147	-0.694551	Gm6665	predicted gene 6665
ENSMUSG00000030446	-0.30853	0.427291	-0.694064	Zfp273	zinc finger protein 273
ENSMUSG00000021773	-0.0912768	0.318515	-0.693717	Comtd1	catechol-O-methyltransferase domain containing 1
ENSMUSG00000020635	-0.253892	0.332426	-0.691886	Fkbp1b	FK506 binding protein 1b
ENSMUSG00000033597	-0.496993	0.198712	-0.691283	Caskin1	CASK interacting protein 1
ENSMUSG00000064231	-0.286592	0.608128	-0.68978	Gm5321	predicted gene 5321
ENSMUSG00000024842	-0.063345	0.453165	-0.688815	Cabp4	calcium binding protein 4
ENSMUSG00000074754	-0.453351	0.226812	-0.687302	Smim26	small integral membrane protein 26
ENSMUSG00000064443	-0.542849	1.31015	-0.686592	Gm26226	predicted gene, 26226
ENSMUSG00000094840	-0.299985	0.168881	-0.685978	Muc3a	mucin 3A, cell surface associated
ENSMUSG00000071192	-0.350977	0.327486	-0.685402	Wfikkn1	WAP, FS, Ig, KU, and NTR-containing protein 1
ENSMUSG00000021928	-0.354404	0.491399	-0.683017	Ebpl	emopamil binding protein-like
ENSMUSG00000098204	0.316993	0.8	-0.683007	Gm26984	predicted gene, 26984
ENSMUSG00000042793	-0.498371	0.516992	-0.683007	Lgr6	leucine-rich repeat-containing G protein-coupled receptor 6
ENSMUSG00000006720	-0.282114	0.491886	-0.683007	Zfp184	zinc finger protein 184 (Kruppel-like)
ENSMUSG00000071424	-0.716993	0.316993	-0.683007	Grid2	glutamate receptor, ionotropic, delta 2
ENSMUSG00000009670	-0.483007	0.2	-0.683007	Tex11	testis expressed gene 11
ENSMUSG00000075394	-0.308864	0.193157	-0.681393	Hoxc4	homeobox C4
ENSMUSG00000049690	-0.17451	0.41171	-0.680858	Nckap5	NCK-associated protein 5
ENSMUSG00000097462	-0.430401	0.647408	-0.680176	9530026P05Rik	RIKEN cDNA 9530026P05 gene
ENSMUSG00000040441	-0.531181	0.539874	-0.679772	Slc26a10	solute carrier family 26, member 10
ENSMUSG00000040428	0.0720717	0.516295	-0.679482	Plekha4	pleckstrin homology domain containing, family A (phosphoinositide binding specific) member 4
ENSMUSG00000006784	-0.264386	0.965055	-0.678463	Odad4	outer dynein arm complex subunit 4
ENSMUSG00000089265	-0.264386	0.864386	-0.678463	Gm22888	predicted gene, 22888
ENSMUSG00000047586	-0.0304006	0.4327	-0.678463	Nccrp1	non-specific cytotoxic cell receptor protein 1 homolog (zebrafish)
ENSMUSG00000097336	-0.180459	0.376973	-0.678463	Fendrr	Foxf1 adjacent non-coding developmental regulatory RNA
ENSMUSG00000035179	-0.355522	0.310508	-0.678463	Ppp1r32	protein phosphatase 1, regulatory subunit 32
ENSMUSG00000089145	-0.345028	0.277808	-0.678463	No associated gene
ENSMUSG00000033419	-0.595171	0.476156	-0.678309	Snap91	synaptosomal-associated protein 91
ENSMUSG00000062753	-0.0141675	0.397669	-0.677819	Smim29	small integral membrane protein 29
ENSMUSG00000097476	-0.402079	0.239814	-0.677405	Gm26583	predicted gene, 26583
ENSMUSG00000081620	-0.107659	0.301891	-0.677389	Gm14633	predicted gene 14633
ENSMUSG00000089683	-0.241579	0.606888	-0.677178	4930570N18Rik	RIKEN cDNA 4930570N18 gene
ENSMUSG00000085591	0.0643856	0.581378	-0.676164	Gm13479	predicted gene 13479
ENSMUSG00000058932	-0.107659	0.30947	-0.675942	Gm2174	predicted gene 2174
ENSMUSG00000080115	-0.566015	0.433985	-0.674879	Eef1akmt3	EEF1A lysine methyltransferase 3
ENSMUSG00000044328	-0.0132005	0.656448	-0.672811	Trp53i13	transformation related protein 53 inducible protein 13
ENSMUSG00000080836	-0.159172	0.981378	-0.672634	Gm6444	predicted gene 6444
ENSMUSG00000081695	-0.160575	0.384213	-0.671891	Rpsa-ps5	ribosomal protein SA, pseudogene 5
ENSMUSG00000073888	-0.477656	0.378797	-0.671359	Ccl27a	chemokine (C-C motif) ligand 27A
ENSMUSG00000026736	-0.655368	0.677808	-0.671229	4930426L09Rik	RIKEN cDNA 4930426L09 gene
ENSMUSG00000030068	-0.39245	0.328441	-0.671149	Gm20696	predicted gene 20696
ENSMUSG00000057696	-0.431086	0.4216	-0.67107	Rpl30-ps1	ribosomal protein L30, pseudogene 1
ENSMUSG00000004031	-0.151937	0.264386	-0.669585	Brinp2	bone morphogenic protein/retinoic acid inducible neural-specific 2
ENSMUSG00000060636	-0.166333	0.243392	-0.66941	Rpl35a	ribosomal protein L35A
ENSMUSG00000003355	-0.109914	0.602079	-0.668958	Fkbp11	FK506 binding protein 11
ENSMUSG00000066475	-0.0671816	0.350684	-0.668851	Gm10268	predicted gene 10268
ENSMUSG00000062896	-0.153518	0.382412	-0.667717	Rpl31-ps11	ribosomal protein L31, pseudogene 11
ENSMUSG00000035934	-0.323447	0.156352	-0.666935	Pknox2	Pbx/knotted 1 homeobox 2
ENSMUSG00000029026	0.135614	1.16147	-0.664386	Trp73	transformation related protein 73
ENSMUSG00000082245	0.116992	0.969599	-0.664386	Gm6292	predicted gene 6292
ENSMUSG00000084890	0.116992	0.747393	-0.664386	A830036E02Rik	RIKEN cDNA A830036E02 gene
ENSMUSG00000056856	-0.116992	0.728771	-0.664386	Jakmip3	janus kinase and microtubule interacting protein 3
ENSMUSG00000026147	-0.433985	0.716993	-0.664386	Col9a1	collagen, type IX, alpha 1
ENSMUSG00000084012	-0.135614	0.716993	-0.664386	Gm11956	predicted gene 11956
ENSMUSG00000075589	0.0748791	0.644478	-0.664386	Gm11536	predicted gene 11536
ENSMUSG00000083761	0	0.547393	-0.664386	Pgam1-ps1	phosphoglycerate mutase 1, pseudogene 1
ENSMUSG00000021478	-0.6	0.516992	-0.664386	Drd1	dopamine receptor D1
ENSMUSG00000074485	-0.516992	0.483007	-0.664386	Gm7381	predicted gene 7381
ENSMUSG00000064648	-0.203584	0.4	-0.664386	Gm23303	predicted gene, 23303
ENSMUSG00000040680	-0.2	0.369599	-0.664386	Kremen2	kringle containing transmembrane protein 2
ENSMUSG00000072688	-0.278463	0.316993	-0.664386	Gm10399	predicted gene 10399
ENSMUSG00000082417	-0.450963	0.27399	-0.663496	Gm13740	predicted gene 13740
ENSMUSG00000074034	-0.236885	0.380676	-0.662765	Gm5921	predicted gene 5921
ENSMUSG00000030325	-0.342773	0.6294	-0.66056	Klrb1c	killer cell lectin-like receptor subfamily B member 1C
ENSMUSG00000080929	-0.495834	0.541421	-0.659104	Gm12891	predicted gene 12891
ENSMUSG00000086268	-0.0562572	1.10838	-0.658652	Gm11670	predicted gene 11670
ENSMUSG00000038155	-0.357613	0.285234	-0.65599	Gstp2	glutathione S-transferase, pi 2
ENSMUSG00000084411	-0.525121	0.426391	-0.654547	Gm11510	predicted gene 11510
ENSMUSG00000062458	-0.295675	0.278891	-0.653921	Gm8623	predicted gene 8623
ENSMUSG00000006378	0.00858492	0.485385	-0.653496	Gcat	glycine C-acetyltransferase (2-amino-3-ketobutyrate-coenzyme A ligase)
ENSMUSG00000096983	-0.258865	0.373133	-0.652106	No associated gene
ENSMUSG00000071648	-0.352109	0.440777	-0.650603	Rom1	rod outer segment membrane protein 1
ENSMUSG00000076823	-0.5852	0.691886	-0.650596	Trav13n-4	T cell receptor alpha variable 13N-4
ENSMUSG00000049285	-0.350977	0.452607	-0.648575	Mblac1	metallo-beta-lactamase domain containing 1
ENSMUSG00000083563	-0.321648	0.213975	-0.647123	Gm13340	predicted gene 13340
ENSMUSG00000094191	-0.230075	0.302029	-0.646819	Rpl31-ps14	ribosomal protein L31, pseudogene 14
ENSMUSG00000021086	-0.294969	0.408364	-0.646002	Ccdc175	coiled-coil domain containing 175
ENSMUSG00000094872	-0.280122	0.878525	-0.645555	Igkv9-120	immunoglobulin kappa chain variable 9-120
ENSMUSG00000070942	-0.209503	0.46977	-0.644483	Il1rl2	interleukin 1 receptor-like 2
ENSMUSG00000088703	0	0.8	-0.644478	No associated gene
ENSMUSG00000073608	-0.389568	0.603533	-0.641683	Gal3st2c	galactose-3-O-sulfotransferase 2C
ENSMUSG00000083328	-0.13199	0.597589	-0.638153	Gm11826	predicted gene 11826
ENSMUSG00000095488	0.0437505	0.879199	-0.637465	No associated gene
ENSMUSG00000079165	-0.433232	0.363205	-0.637306	Sap25	sin3 associated polypeptide
ENSMUSG00000093565	-0.398213	0.313578	-0.63535	Rab26os	RAB26, member RAS oncogene family, opposite strand
ENSMUSG00000082711	0.2	0.916992	-0.633985	Gm12987	predicted gene 12987
ENSMUSG00000026304	0.2	0.883007	-0.633985	Rab17	RAB17, member RAS oncogene family
ENSMUSG00000081920	-0.316993	0.761471	-0.633985	Selenot-ps	selenoprotein T, pseudogene
ENSMUSG00000085826	0.198715	0.730415	-0.633985	Gm15638	predicted gene 15638
ENSMUSG00000095812	-0.4	0.6	-0.633985	Gm5473	predicted pseudogene 5473
ENSMUSG00000078162	-0.535614	0.536365	-0.633985	Gm2574	predicted pseudogene 2574
ENSMUSG00000065362	-0.0526069	0.433985	-0.633985	Gm24411	predicted gene, 24411
ENSMUSG00000087207	-0.126526	0.406603	-0.633985	Gm13147	predicted gene 13147
ENSMUSG00000071489	-0.716993	0.369599	-0.633985	Ptgdr	prostaglandin D receptor
ENSMUSG00000083569	-0.2	0.316993	-0.633985	Gm13666	predicted gene 13666
ENSMUSG00000037705	-0.464386	0.2	-0.633985	Tecta	tectorin alpha
ENSMUSG00000044701	0.242113	0.678651	-0.633845	Il27	interleukin 27
ENSMUSG00000089635	-0.535614	0.478463	-0.6327	Gm16559	predicted gene 16559
ENSMUSG00000097113	-0.148095	0.592992	-0.632341	Gm19705	predicted gene, 19705
ENSMUSG00000072612	-0.18384	0.975373	-0.632001	Gm10382	predicted gene 10382
ENSMUSG00000024891	-0.301629	0.362732	-0.631686	Slc29a2	solute carrier family 29 (nucleoside transporters), member 2
ENSMUSG00000027209	-0.353666	0.266919	-0.630208	Fam227b	family with sequence similarity 227, member B
ENSMUSG00000082128	-0.213108	0.393227	-0.628563	Gm11824	predicted gene 11824
ENSMUSG00000018927	0.0955787	0.504696	-0.62807	Ccl6	chemokine (C-C motif) ligand 6
ENSMUSG00000090733	-0.319856	0.272987	-0.626851	Rps27	ribosomal protein S27
ENSMUSG00000032850	-0.393584	0.523477	-0.625995	Rnft2	ring finger protein, transmembrane 2
ENSMUSG00000033255	0.130222	0.622204	-0.625954	Gm5134	predicted gene 5134
ENSMUSG00000088088	-0.0186219	1.07846	-0.625857	Rmrp	RNA component of mitochondrial RNAase P
ENSMUSG00000097385	-0.516992	0.516992	-0.625857	Gm26814	predicted gene, 26814
ENSMUSG00000083496	-0.292659	0.262511	-0.624546	Gm11263	predicted gene 11263
ENSMUSG00000043833	-0.318467	0.353689	-0.623335	2900005J15Rik	RIKEN cDNA 2900005J15 gene
ENSMUSG00000087721	-0.674879	0.508864	-0.622206	No associated gene
ENSMUSG00000019689	-0.004719	0.593262	-0.620976	Fmc1	formation of mitochondrial complex V assembly factor 1
ENSMUSG00000035875	-0.288957	0.874813	-0.619511	AI182371	expressed sequence AI182371
ENSMUSG00000085081	-0.0543169	0.615006	-0.619433	Rptoros	regulatory associated protein of MTOR, complex 1, opposite strand
ENSMUSG00000082901	-0.233621	0.344233	-0.619409	Rps8-ps5	ribosomal protein S8, pseudogene 5
ENSMUSG00000098120	-0.237119	0.419751	-0.618195	Gm5914	predicted gene 5914
ENSMUSG00000093686	-0.294585	0.448141	-0.618176	Gm4705	predicted gene 4705
ENSMUSG00000059912	-0.397989	0.339382	-0.617418	Rpl21-ps6	ribosomal protein L21, pseudogene 6
ENSMUSG00000073386	-0.3369	0.431056	-0.616978	9830107B12Rik	RIKEN cDNA 9830107B12 gene
ENSMUSG00000084291	-0.168957	0.567837	-0.616155	Gm6654	predicted pseudogene 6654
ENSMUSG00000076607	-0.497727	0.328596	-0.614333	Igkj4	immunoglobulin kappa joining 4
ENSMUSG00000086946	-0.0584361	0.766015	-0.614078	Gm15527	predicted gene 15527
ENSMUSG00000059830	-0.553343	0.377794	-0.612602	Gm16380	predicted pseudogene 16380
ENSMUSG00000096969	-0.575644	0.678602	-0.612067	No associated gene
ENSMUSG00000081675	-0.402604	0.246722	-0.611802	Gm12712	predicted gene 12712
ENSMUSG00000021492	-0.2	0.8	-0.611779	F12	coagulation factor XII (Hageman factor)
ENSMUSG00000084632	-0.0983706	0.581378	-0.611779	Gm23887	predicted gene, 23887
ENSMUSG00000080811	-0.369599	0.410493	-0.611779	Gm14513	predicted gene 14513
ENSMUSG00000083152	-0.415363	0.348216	-0.611779	Apc-ps1	adenomatosis polyposis coli, pseudogene 1
ENSMUSG00000059159	-0.270552	0.303878	-0.610177	Gm8129	predicted pseudogene 8129
ENSMUSG00000076676	-0.769599	0.485307	-0.608879	Ighv12-3	immunoglobulin heavy variable V12-3
ENSMUSG00000083829	-0.712686	0.630689	-0.607328	Gm2199	predicted gene 2199
ENSMUSG00000036912	-0.131484	0.892541	-0.606773	Piwil4	piwi-like RNA-mediated gene silencing 4
ENSMUSG00000082465	-0.331608	0.305035	-0.605887	Rps6-ps3	ribosomal protein S6, pseudogene 3
ENSMUSG00000095600	-0.4631	0.422206	-0.604474	Gm9457	predicted gene 9457
ENSMUSG00000091876	-0.233099	0.350032	-0.602033	Gm3851	predicted gene 3851
ENSMUSG00000019158	-0.263456	0.705602	-0.601963	Tmem160	transmembrane protein 160
ENSMUSG00000074516	-0.0708922	0.575708	-0.600446	Gm10709	predicted gene 10709
ENSMUSG00000098019	-0.2	0.950978	-0.6	Gm2546	predicted gene 2546
ENSMUSG00000091785	-0.228036	0.939265	-0.6	Rpl29-ps5	ribosomal protein L29, pseudogene 5
ENSMUSG00000020912	-0.283008	0.883007	-0.6	Krt12	keratin 12
ENSMUSG00000040525	-0.366015	0.716993	-0.6	Cblc	Casitas B-lineage lymphoma c
ENSMUSG00000027168	-0.316993	0.6	-0.6	Pax6	paired box 6
ENSMUSG00000071636	-0.252607	0.6	-0.6	Rimbp3	RIMS binding protein 3
ENSMUSG00000095944	-0.375549	0.585922	-0.6	No associated gene
ENSMUSG00000030666	0	0.516992	-0.6	Calcb	calcitonin-related polypeptide, beta
ENSMUSG00000087570	-0.116992	0.516992	-0.6	Gm13647	predicted gene 13647
ENSMUSG00000087430	-0.413491	0.347393	-0.6	Gm13405	predicted gene 13405
ENSMUSG00000091618	-0.283008	0.316993	-0.6	H60c	histocompatibility 60c
ENSMUSG00000082810	-0.6	0.283008	-0.6	Gm8682	predicted gene 8682
ENSMUSG00000098623	-0.448063	0.211779	-0.6	Mir8112	microRNA 8112
ENSMUSG00000072255	-0.70357	0.756177	-0.599275	Rpl31-ps17	ribosomal protein L31, pseudogene 17
ENSMUSG00000084874	-0.419372	0.483103	-0.598871	Gm12906	predicted gene 12906
ENSMUSG00000058050	-0.197379	0.550693	-0.598222	Gm9234	predicted pseudogene 9234
ENSMUSG00000034818	-0.0830075	0.555522	-0.597821	Celf5	CUGBP, Elav-like family member 5
ENSMUSG00000083320	-0.357651	0.380694	-0.597802	Gm13935	predicted gene 13935
ENSMUSG00000057990	-0.522607	0.373483	-0.596847	Gm53055	predicted gene 53055
ENSMUSG00000066258	-0.552592	0.648202	-0.595456	Trim12a	tripartite motif-containing 12A
ENSMUSG00000095500	-0.407373	0.523931	-0.594171	No associated gene
ENSMUSG00000037577	-0.0421134	0.690007	-0.589507	Ephx3	epoxide hydrolase 3
ENSMUSG00000085526	-0.489935	0.205199	-0.589354	Gm16083	predicted gene 16083
ENSMUSG00000059252	-0.57566	0.24471	-0.588512	Tpt1-ps5	tumor protein, translationally-controlled, pseudogene 5
ENSMUSG00000029321	0.0142653	0.623492	-0.588221	Slc10a6	solute carrier family 10 (sodium/bile acid cotransporter family), member 6
ENSMUSG00000026939	-0.168636	0.603126	-0.585674	Tmem141	transmembrane protein 141
ENSMUSG00000041245	-0.0474078	0.86678	-0.585387	Wnk3	WNK lysine deficient protein kinase 3
ENSMUSG00000080851	-0.0281557	0.910173	-0.583773	Gm12094	predicted gene 12094
ENSMUSG00000089170	-0.550978	0.928771	-0.581378	No associated gene
ENSMUSG00000081819	-0.316993	0.883007	-0.581378	Gm12722	predicted gene 12722
ENSMUSG00000082061	0.0830075	0.581378	-0.581378	Gm12726	predicted gene 12726
ENSMUSG00000071040	-0.483007	0.433985	-0.581378	Gm9386	predicted pseudogene 9386
ENSMUSG00000086806	-0.559172	0.350977	-0.581378	Gm13054	predicted gene 13054
ENSMUSG00000091408	-0.277579	0.561867	-0.580951	Gm6728	predicted gene 6728
ENSMUSG00000034551	-0.289125	0.353127	-0.579272	Hdx	highly divergent homeobox
ENSMUSG00000096173	-0.102512	0.539163	-0.578506	Gm3150	predicted gene 3150
ENSMUSG00000083624	-0.664386	0.574894	-0.574894	Gm12469	predicted gene 12469
ENSMUSG00000086962	-0.540088	0.335614	-0.574894	Faxdc2	fatty acid hydroxylase domain containing 2
ENSMUSG00000094152	-0.19931	0.433461	-0.574679	Slc6a16	solute carrier family 6, member 16
ENSMUSG00000085586	-0.37913	0.84712	-0.573333	Gm11613	predicted gene 11613
ENSMUSG00000089755	-0.683007	1.01178	-0.57325	0610012D04Rik	RIKEN cDNA 0610012D04 gene
ENSMUSG00000055137	-0.478463	0.664386	-0.57325	Sugct	succinyl-CoA glutarate-CoA transferase
ENSMUSG00000048216	-0.1369	0.633985	-0.57325	Gpr85	G protein-coupled receptor 85
ENSMUSG00000029659	-0.381378	0.464386	-0.572499	Medag	mesenteric estrogen dependent adipogenesis
ENSMUSG00000076479	-0.319334	0.485243	-0.572128	Trbv26	T cell receptor beta, variable 26
ENSMUSG00000097233	-0.575078	0.281183	-0.571384	Gm17552	predicted gene, 17552
ENSMUSG00000084497	-0.029441	0.96065	-0.569599	Gm22107	predicted gene, 22107
ENSMUSG00000082964	0.149692	0.665671	-0.569599	Rpl13-ps5	ribosomal protein L13, pseudogene 5
ENSMUSG00000085914	-0.0598416	0.694786	-0.568586	Gm14320	predicted gene 14320
ENSMUSG00000097803	-0.281323	0.426569	-0.568088	Rpl31-ps16	ribosomal protein L31, pseudogene 16
ENSMUSG00000035105	-0.0656323	0.71862	-0.567103	Egln3	egl-9 family hypoxia-inducible factor 3
ENSMUSG00000092275	-0.602537	0.331209	-0.566699	Gm20465	predicted gene 20465
ENSMUSG00000024107	-0.4	0.844478	-0.566015	Lhcgr	luteinizing hormone/choriogonadotropin receptor
ENSMUSG00000027460	-0.464386	0.716993	-0.566015	Angpt4	angiopoietin 4
ENSMUSG00000083562	-0.233985	0.989507	-0.561471	Gm13234	predicted gene 13234
ENSMUSG00000091997	-0.380093	0.864386	-0.561471	Gm6611	predicted gene 6611
ENSMUSG00000097013	-0.150977	0.848063	-0.561471	No associated gene
ENSMUSG00000086644	-0.320181	0.8	-0.561471	Gm13470	predicted gene 13470
ENSMUSG00000057829	-0.316993	0.716993	-0.561471	Gm5278	predicted pseudogene 5278
ENSMUSG00000097429	-0.344134	0.621868	-0.560796	Gm26520	predicted gene, 26520
ENSMUSG00000026415	-0.274897	0.433866	-0.55996	Fcamr	Fc receptor, IgA, IgM, high affinity
ENSMUSG00000020268	-0.309549	0.367372	-0.559293	Lyrm7	LYR motif containing 7
ENSMUSG00000054679	-0.561291	0.350857	-0.559106	Srsf12	serine and arginine-rich splicing factor 12
ENSMUSG00000050994	-0.425157	0.545549	-0.556178	Adgb	androglobin
ENSMUSG00000062582	-0.352087	0.433585	-0.555661	Rpl30-ps8	ribosomal protein L30, pseudogene 8
ENSMUSG00000083468	-0.628815	0.362959	-0.555526	Gm9431	predicted gene 9431
ENSMUSG00000081800	-0.368944	0.471324	-0.554735	Gm14200	predicted gene 14200
ENSMUSG00000027603	-0.0965706	0.595286	-0.554166	Ggt7	gamma-glutamyltransferase 7
ENSMUSG00000087701	-0.261735	0.44505	-0.552827	Gm13493	predicted gene 13493
ENSMUSG00000048776	-0.314896	0.386828	-0.552592	Pthlh	parathyroid hormone-like peptide
ENSMUSG00000055188	-0.231739	0.687622	-0.552332	Rbm3os	RNA binding motif protein 3, opposite strand
ENSMUSG00000085893	-0.231226	0.464793	-0.552022	Gm12091	predicted gene 12091
ENSMUSG00000080574	-0.524366	0.425857	-0.551798	Mir466i	microRNA 466i
ENSMUSG00000033208	-0.716993	0.950978	-0.550978	S100b	S100 protein, beta polypeptide, neural
ENSMUSG00000088299	-0.781378	0.947393	-0.550978	No associated gene
ENSMUSG00000078677	-0.445764	0.815363	-0.550978	Gm10974	predicted gene 10974
ENSMUSG00000083362	-0.233985	0.550978	-0.550978	Gm8606	predicted gene 8606
ENSMUSG00000081226	-0.116992	0.516992	-0.550978	Gm8802	predicted gene 8802
ENSMUSG00000091323	0.0526069	0.683007	-0.547393	No associated gene
ENSMUSG00000015962	-0.4	0.547393	-0.547393	1700016C15Rik	RIKEN cDNA 1700016C15 gene
ENSMUSG00000086468	-0.5369	0.5369	-0.547393	Etaa1os	Ewing tumor-associated antigen 1, opposite strand
ENSMUSG00000084314	-0.0931913	0.645736	-0.546752	Rps15a-ps3	ribosomal protein S15A, pseudogene 3
ENSMUSG00000086889	-0.268981	0.44635	-0.544551	Phf2os1	PHD finger protein 2, opposite strand 1
ENSMUSG00000033177	-0.316993	0.452607	-0.544493	Tmprss7	transmembrane serine protease 7
ENSMUSG00000093734	-0.378618	0.438295	-0.544276	No associated gene
ENSMUSG00000079391	-0.442341	0.472193	-0.541306	Gm2974	predicted gene 2974
ENSMUSG00000042751	-0.223916	0.750977	-0.540909	Nmnat2	nicotinamide nucleotide adenylyltransferase 2
ENSMUSG00000093076	-0.53278	0.476357	-0.539265	Mir3082	microRNA 3082
ENSMUSG00000098985	-0.301287	0.413447	-0.537349	Gm27219	predicted gene 27219
ENSMUSG00000097460	-0.37325	0.483007	-0.5369	No associated gene
ENSMUSG00000099075	-0.0830075	0.698371	-0.535614	Mir7674	microRNA 7674
ENSMUSG00000085936	-0.116992	0.538376	-0.535614	2610307P16Rik	RIKEN cDNA 2610307P16 gene
ENSMUSG00000024008	-0.392661	0.739665	-0.53349	Cpne5	copine V
ENSMUSG00000062342	-0.0830075	0.8	-0.53107	Serpinb9e	serine (or cysteine) peptidase inhibitor, clade B, member 9e
ENSMUSG00000029544	-0.200823	0.588972	-0.53107	Cabp1	calcium binding protein 1
ENSMUSG00000029816	0.0222063	0.881878	-0.527486	Gpnmb	glycoprotein (transmembrane) nmb
ENSMUSG00000002341	-0.54587	0.664386	-0.527486	Ncan	neurocan
ENSMUSG00000093768	-0.265617	0.461673	-0.52738	Gm20650	predicted gene 20650
ENSMUSG00000092233	-0.661971	0.698371	-0.52311	Gm20403	predicted gene 20403
ENSMUSG00000020419	-0.0830075	0.761471	-0.522942	Hormad2	HORMA domain containing 2
ENSMUSG00000086335	-0.545148	0.505214	-0.521537	Gm12107	predicted gene 12107
ENSMUSG00000041729	-0.305215	0.640506	-0.521299	Coro2b	coronin, actin binding protein, 2B
ENSMUSG00000044145	-0.297975	0.486833	-0.520434	1810024B03Rik	RIKEN cDNA 1810024B03 gene
ENSMUSG00000082099	-0.184598	0.538319	-0.517886	Gm12013	predicted gene 12013
ENSMUSG00000094462	0	0.8	-0.516992	Gm21028	predicted gene, 21028
ENSMUSG00000095895	0.2	0.750977	-0.516992	Gm21963	predicted gene, 21963
ENSMUSG00000064765	-0.645764	0.716993	-0.516992	Gm26456	predicted gene, 26456
ENSMUSG00000049897	-0.700975	0.705749	-0.516992	Stkld1	serine/threonine kinase-like domain containing 1
ENSMUSG00000085284	-0.283008	0.683007	-0.516992	Gm16189	predicted gene 16189
ENSMUSG00000094914	-0.532426	0.683007	-0.516992	Trav9d-2	T cell receptor alpha variable 9D-2
ENSMUSG00000052482	0	0.664386	-0.516992	Gm8174	predicted gene 8174
ENSMUSG00000063232	-0.147393	0.658556	-0.516992	Serpina11	serine (or cysteine) peptidase inhibitor, clade A (alpha-1 antiproteinase, antitrypsin), member 11
ENSMUSG00000001260	-0.6	0.6	-0.516992	Gabrg1	gamma-aminobutyric acid (GABA) A receptor, subunit gamma 1
ENSMUSG00000081238	-0.716993	0.6	-0.516992	Gm15836	predicted gene 15836
ENSMUSG00000047591	-0.116992	0.6	-0.516992	Mafa	MAF bZIP transcription factor A
ENSMUSG00000066760	-0.316993	0.6	-0.516992	Psg16	pregnancy specific beta-1-glycoprotein 16
ENSMUSG00000055015	-0.283008	0.581378	-0.516992	Gm9961	predicted gene 9961
ENSMUSG00000064653	-0.252607	0.547393	-0.516992	Gm26129	predicted gene, 26129
ENSMUSG00000082254	-0.316993	0.516992	-0.516992	Gm11922	predicted gene 11922
ENSMUSG00000081594	-0.6	0.464386	-0.516992	Gm15467	predicted gene 15467
ENSMUSG00000086013	-0.21677	0.560328	-0.516409	Gm15706	predicted gene 15706
ENSMUSG00000079962	-0.518468	0.41681	-0.515693	Gm12643	predicted gene 12643
ENSMUSG00000038491	-0.475443	0.500765	-0.514161	Cdk19os	cyclin dependent kinase 19, opposite strand
ENSMUSG00000066009	-0.384989	0.412534	-0.512272	Zfp987	zinc finger protein 987
ENSMUSG00000050150	-0.498371	0.697085	-0.511163	Slc9b1	solute carrier family 9, subfamily B (NHA1, cation proton antiporter 1), member 1
ENSMUSG00000074178	-0.298371	0.547393	-0.508864	Gm10638	predicted gene 10638
ENSMUSG00000041552	-0.559853	0.569599	-0.505984	Ptchd1	patched domain containing 1
ENSMUSG00000027456	-0.358307	0.513401	-0.504905	Sdcbp2	syndecan binding protein (syntenin) 2
ENSMUSG00000020182	-0.422957	0.769599	-0.501629	Ddc	dopa decarboxylase
ENSMUSG00000057322	-0.450551	0.442781	-0.500877	Rpl38	ribosomal protein L38
ENSMUSG00000065999	-0.4271	0.492234	-0.495813	Zfp985	zinc finger protein 985
ENSMUSG00000032327	-0.501115	0.473251	-0.489789	Stra6	stimulated by retinoic acid gene 6
ENSMUSG00000028194	-0.195595	0.780984	-0.489698	Ddah1	dimethylarginine dimethylaminohydrolase 1
ENSMUSG00000032356	-0.430401	0.561471	-0.488957	Rasgrf1	RAS protein-specific guanine nucleotide-releasing factor 1
ENSMUSG00000096827	-0.568849	0.650633	-0.480121	Trav14n-1	T cell receptor alpha variable 14N-1
ENSMUSG00000076630	-0.527486	0.550978	-0.478463	Ighd1-1	immunoglobulin heavy diversity 1-1
ENSMUSG00000090105	-0.347393	0.516992	-0.478463	Gm15890	predicted gene 15890
ENSMUSG00000082990	-0.675702	0.765541	-0.469565	Gm14052	predicted gene 14052
ENSMUSG00000046269	-0.557581	0.71917	-0.460614	Usp27x	ubiquitin specific peptidase 27, X chromosome
ENSMUSG00000096452	-0.664386	0.742099	-0.459091	Ighv1-77	immunoglobulin heavy variable 1-77
ENSMUSG00000032224	-0.47618	0.63698	-0.455368	Fam81a	family with sequence similarity 81, member A
ENSMUSG00000076889	-0.516992	0.633985	-0.433985	Traj41	T cell receptor alpha joining 41
ENSMUSG00000046168	-0.347393	0.675929	-0.431877	Kcnrg	potassium channel regulator
ENSMUSG00000017720	-0.3644	0.633985	-0.418622	Trp53tg5	transformation related protein 53 target 5
ENSMUSG00000081354	-0.516992	0.6	-0.4	Gm14894	predicted gene 14894

## Sheet: Cluster 3
Gene ID	Day 4	Day 7	Day 35	Gene symbol	Gene name
ENSMUSG00000095891	-2.14285	-0.4	-0.464386	Gm10717	predicted gene 10717
ENSMUSG00000036856	-1.97325	0.4	-0.8	Wnt4	wingless-type MMTV integration site family, member 4
ENSMUSG00000084649	-1.71015	-0.2327	-0.528771	No associated gene
ENSMUSG00000065211	-1.67846	0.516992	-0.264386	Gm26265	predicted gene, 26265
ENSMUSG00000039676	-1.66439	0.633985	0.4	Capsl	calcyphosine-like
ENSMUSG00000022464	-1.63399	-0.283008	-0.4	Slc38a4	solute carrier family 38, member 4
ENSMUSG00000087384	-1.61579	0.291065	0.181378	Gm15558	predicted gene 15558
ENSMUSG00000053442	-1.56276	1.10886	0.411779	4930597O21Rik	RIKEN cDNA 4930597O21 gene
ENSMUSG00000076909	-1.55337	0.350977	-0.320577	Traj20	T cell receptor alpha joining 20
ENSMUSG00000095529	-1.55098	0.418622	0.33107	No associated gene
ENSMUSG00000048347	-1.51245	0.375429	0.513408	Pcdhb18	protocadherin beta 18
ENSMUSG00000028919	-1.49837	-0.433985	-0.0304006	Arhgef19	Rho guanine nucleotide exchange factor (GEF) 19
ENSMUSG00000028259	-1.49837	-0.0830075	0.452607	Fhl5	four and a half LIM domains 5
ENSMUSG00000029868	-1.45507	0.380608	-0.240828	Trpv6	transient receptor potential cation channel, subfamily V, member 6
ENSMUSG00000024600	-1.44576	0.769599	0.0643856	Slc27a6	solute carrier family 27 (fatty acid transporter), member 6
ENSMUSG00000090303	-1.4275	1.06439	0.214078	Vmn2r-ps3	vomeronasal 2, receptor, pseudogene 3
ENSMUSG00000039315	-1.42586	-0.2	0.2	Clnk	cytokine-dependent hematopoietic cell linker
ENSMUSG00000084105	-1.41178	0.391872	-0.2	Gm13252	predicted gene 13252
[truncated: 958 more rows]

## Sheet: Cluster 4
Gene ID	Day 4	Day 7	Day 35	Gene symbol	Gene name
[truncated: 684 more rows]

## Sheet: Cluster 5
Gene ID	Day 4	Day 7	Day 35	Gene symbol	Gene name
[truncated: 4,080 more rows]

[truncated: 10 more sheets: Cluster 6, Cluster 7, Cluster 8, Cluster 9, Cluster 10, Cluster 11, Cluster 12, Cluster 13, Cluster 14, Cluster 15]
