# Supplementary material for: Exploring the Role of Platelets in Virus-Induced Inflammatory Demyelinating Disease and Myocarditis
Source: Int J Mol Sci. 2024 Mar 19;25(6):3460. doi: 10.3390/ijms25063460 (PMC10970283; doi:10.3390/ijms25063460)
Supplement: Supplementary file 1 [file ijms-25-03460-s001.zip › Supplemental Table S4.xlsx]

## Sheet: Cluster 1
DAVID functional clustering of genes in cluster 1 in splenic transcriptome of TMEV-infected mice
Cluster #	Pathway	Enrichment Score	Gene IDs
1	extracellular space	5.69149	Bcan, Pebp4, Siah1b, Grin2a, Prrt4, Bsg, Prl2c2, Hapln2, D130043K22Rik, Pcdhb8, Sftpd, Ltbp3, Pcdhb12, Masp1, Esam, Orm1, Igkv6-25, Grm6, Pi15, Cntnap1, Vsig2, Tpbg, Wfdc2, Col8a1, Amtn, Gpc4, Ssc5d, Mug2, Them6, Gm1110, Hamp, Kirrel2, Tmem273, Tmem256, Pi16, Mrc2, Cpa4, Rnase12, Kng1, Rdh16f2, Hrg, Trav7d-4, Srl, Prl3b1, Dcpp1, Mmp9, Nrxn2, H2-T3, Slurp2, Pla2g12b, 9330151L19Rik, Gas6, Areg, Thb…
2	extracellular matrix	4.45175	Bcan, Tnfrsf11b, Eln, Dcn, Adamts19, Tnc, Col8a2, Mmp8, Hapln2, Sspo, Otog, Egflam, Mmp17, Ltbp3, Zan, Tril, Adamtsl2, Muc2, Lox, Scara3, Col8a1, Lama5, Amtn, Optc, Adamts2, Ssc5d, Adamts8, Loxl1, Col4a3, Marco, Adamts17, Smoc2, Zp3, Col6a1, Lingo2, Mmp9
3	Glycoprotein	4.04349	Bcan, Pebp4, Siah1b, Grin2a, Prrt4, Bsg, Prl2c2, Hapln2, D130043K22Rik, Pcdhb8, Sftpd, Ltbp3, Pcdhb12, Masp1, Esam, Orm1, Igkv6-25, Grm6, Pi15, Cntnap1, Vsig2, Tpbg, Wfdc2, Col8a1, Amtn, Gpc4, Ssc5d, Mug2, Them6, Gm1110, Hamp, Kirrel2, Tmem273, Tmem256, Pi16, Mrc2, Cpa4, Rnase12, Kng1, Rdh16f2, Hrg, Trav7d-4, Srl, Prl3b1, Dcpp1, Mmp9, Nrxn2, H2-T3, Slurp2, Pla2g12b, 9330151L19Rik, Gas6, Areg, Thb…
4	multicellular organism development	2.44654	Spata19, Fhl1, Sirt6, Siah1b, Hoxc5, Dlx1, Dab2ip, Hoxc10, Itga8, Egfl7, D130043K22Rik, Hoxc6, Creb3l4, Vsx2, Pi15, Nkx2-3, Prrx2, Mycbpap, Tcf15, Lefty2, H2az1, Pbx1, Notch3, Cntf, Wnt8b, Ecscr, Ssc5d, Hey2, Zscan21, Rspo2, Mesp2, Ror1, Epha4, Emx2, Zic5, Gli2, Vangl2, Pax4, Efnb3, Neurod2, Prm2, Cdh20, Ccin, Chrdl2, Nme5, Adgrg1, Figla, Foxo4, Meis1, Dll4, Pdlim7, 4930447C04Rik, Edar, Sim2, Veg…
5	Nucleus	2.30077	Gps2, Zmat2, Sirt6, Siah1b, Hdgf, Onecut3, Aire, Speg, Ctnnbip1, Mustn1, Tssc4, Lhpp, Tcf15, Atosb, Klf16, Ptpa, Rad18, Nup133, Mypop, Zbtb8b, Ppp1r26, Zic5, Tchp, E4f1, Rnase12, Sox17, Trerf1, Pax4, Cep85, Clk3, Nr2f1, Figla, Gadd45gip1, Foxo4, Rbm38, Sod1, Kat8, Ccnd3, Jrk, Ryk, Coprs, Med19, Myf6, Scrt1, Rd3, Afmid, Elf5, Bnip3l, Ebf2, Zfp488, Spata24, Snrpa, Tbx15, Mapk12, H2az2, Oit3, Tax1bp…
6	Kringle-like fold	2.08768	Ror1, Hgfac, Habp2, Mst1, Plat, Mmp9, Mrc2
7	LRR 4	2.04706	Lrrc43, Lrguk, Dcn, Podn, Lrtm1, Tril, Lrit3, Ppp1r42, Tpbg, Fbxl2, Optc, Ppp1r37, Anp32b, Amigo3, Nlrp3, Lrrc39, Gm20605, Slitrk4, Amigo1, Pidd1, Tbcel, Nlrp4c, Lrrc55, Lingo2, Lrrc4b, Fbxl22
8	Collagen	1.95852	Col4a3, Col12a1, Marco, C1ql1, Col6a1, Col8a2, Col7a1, Col8a1, Scara3, C1ql4, Sftpd
9	Ion transport	1.89572	Gabrb1, Kcne1, Kcnk18, Clcnka, Chrnb3, Grin2a, Kcnn3, Meltf, Prss30, Slc22a2, Hfe, Slc5a5, Slc4a3, Kcnq1, Kcns3, Slc22a7, Kctd14, P2rx1, Kcnj3, Kcnv2, Chrna7, Chrna3, Kcnk15, Kcnn4, Panx3, Cacnb3, Calhm4, Bspry, Kcnt1, Calhm5, Slc23a1, Fxyd4, Kcnd2, Kcnc3, Trpv1, Slc13a4, Atp6v1b1, Slc24a5, Kcnk7, Kcng1, Otop2, Lrrc55, Slc24a1, Hcn4, Fxyd7, Scn10a
10	Ion channel	1.79031	Gabrb1, Kcne1, Kcnk18, Clcnka, Chrnb3, Grin2a, Kcnn3, Kcnq1, Kcns3, Kctd14, P2rx1, Kcnj3, Kcnv2, Chrna7, Chrna3, Kcnk15, Kcnn4, Panx3, Cacnb3, Calhm4, Kcnt1, Calhm5, Fxyd4, Kcnd2, Kcnc3, Trpv1, Kcnk7, Kcng1, Otop2, Lrrc55, Hcn4, Fxyd7, Scn10a
11	PI3K-Akt signaling pathway	1.67605	Areg, Thbs3, Them4, Ntf5, Hsp90aa1, Tnc, Hras, Itga5, Stk11, Itga8, Magi2, Vegfb, Creb3l4, Gng13, Ccnd3, Lama5, Itga2b, Gng11, Gng3, Ppp2r3d, G6pc1, Col4a3, Pck2, Egf, Bcl2l1, Itgb6, Pdgfb, Nos3, Casp9, Col6a1, Bad, Fgf2
12	Synapse	1.50223	Syn3, Snap25, Gabrb1, Srpx2, Lgi3, Sarm1, Chrnb3, Grin2a, Arhgef9, Magi2, Egflam, Arl8a, Mpst, Amph, Gpr156, Cpeb3, Dlgap2, Samd4, Cplx1, Chrna7, Chrna3, Slc6a1, Nrgn, Nos1, Epha4, Bcl2l1, Kcnd2, Kcnc3, Trpv1, Cnih3, Iqsec3, Frrs1l, Chrm4, Dgkb, Ache, Syngr1, Rph3a, Cbarp, Lrrc4b, Nrxn2, Wasf1
13	Rhodanese-like domain	1.5007	Mpst, Dusp1, Cdc25b, Tstd2, Dusp5, Tst
14	MAGE protein	1.47432	Mageb16, Mageb1, Ndn, Magea1, Mageb2, Magea2
15	Copper	1.45236	Loxl2, Loxl1, Aplp1, Muc2, Sco2, Hrg, Lox, Sod1, Aoc3
16	acetylcholine receptor signaling pathway	1.36108	Ache, Ly6g, Chrna7, Lypd1, Ly6g2, Chrna3, Slurp2, Ly6h
17	Epidermal growth factor-like domain	1.3603	Bcan, Gas6, Areg, Thbs3, Tnc, Habp2, Dll4, Adam33, Otog, Egfl7, Egflam, Adam1b, Ltbp3, Zan, Masp1, Cntnap1, Plat, Itgbl1, Notch3, Lama5, Egfl8, Hgfac, Ltbp2, Egf, Fbln5, Oit3, Pcsk6, Nrxn2
18	von Willebrand factor, type C	1.31853	Muc2, Chrdl1, Otog, Sspo, Chrdl2, Zan
19	Fibrinogen C-terminal	1.30334	Cntnap1, Tnc, Fibcd1, Angptl2, Mfap4, Angptl4
20	Kringle-like fold	1.29106	Ror1, Hgfac, Habp2, Mst1, Plat, Mmp9, Mrc2
21	Removed in mature form	1.26071	Raet1d, Hgfac, Gpc2, Grk1, Vtcn1, Mras, Meltf, Ly6g, Hras, Prss30, Lypd1, Pdgfb, Stk11, Mmp17, Rhoc, Ly6h, Nrn1l, Zp3, Gng13, Rgma, Dpep2, Gpc4, Gng11, Gng3
22	Collagen	1.25638	Col4a3, Col12a1, Marco, C1ql1, Col6a1, Col8a2, Col7a1, Col8a1, Scara3, C1ql4, Sftpd
23	Allergen V5/Tpx-1-related	1.25158	Pi15, Pi16, Crisp1, R3hdml
24	scavenger receptor activity	1.22009	Loxl2, Marco, Cdcp3, Cd163, Ssc5d
25	Homeodomain-like	1.20755	Smarca1, Meis1, Hoxc5, Dlx1, Onecut3, Hoxc10, Hoxc6, Onecut1, Pou5f1, Vsx2, Tshz3, Nkx2-3, Prrx2, Pbx1, Hoxb7, Jrk, Pou2f3, En1, Barx1, Emx2, Pou3f2, Trerf1, Pax4, Irx4, Hoxc9
26	Hydrolase	1.19322	Clca3a2, Otud5, Them4, Enpep, Hsp90aa1, Cdc25b, Mgll, Habp2, Agmat, Tuba4a, Atp23, Mmp17, Masp1, Gm49405, Dnpep, Cpa3, Lhpp, Gdpd3, Cpe, Adamts8, Mpped1, Hgfac, Gm1110, Mras, Noct, Dut, Capn12, Dnph1, Prorp, Pgp, Dclre1b, Cpa4, Pidd1, Ache, Ppt2, Josd2, Metap2, Mmp9, Pla2g12b, Mthfd2l, Smarca1, Nudt11, Plpp5, Sarm1, Adamts19, Prss1, Prss30, Hras, Mmp8, Rasl12, Adam33, Adam1b, Plat, Dpep2, Prss8, …
27	Ion transport 2	1.18234	Kcnn4, Kcnt1, Kcnk18, Kcnk7, Kcnn3, Kcnk15
28	Flavoprotein	1.15575	Sardh, Qsox1, Gsr, Nos1, Fmo4, Pyroxd2, Flad1, Nos3, Acox2, Aox3, Dus2, Pnpo, Txnrd2
29	Redox-active	1.13683	Sco2, Qsox1, Gsr, Nlrp3, Pdia2, Card19, Txnrd2, Nme8
30	CD80-like, immunoglobulin C2-set	1.09008	Mcam, Cd200r2, Mtag2, Kirrel2, Btnl9, Bcam
31	Wnt signaling pathway	1.08213	Ror1, Tgfb1i1, Dact3, Skic8, Barx1, Mir196a-1, Mark1, Fzd6, Ctnnbip1, Tax1bp3, Sox17, Nkd2, Ddit3, Mir195a, Daam2, Cpe, Wnt8b, Sostdc1, Gpc4, Ryk, Rspo2
32	protein dimerization activity	1.00916	Figla, Myf6, Atoh7, E2f4, Bok, Hes3, Ahrr, Sim2, Pef1, Neurod2, Tcf15, Atoh8, Ano4, Rilpl1, Hey2, Mesp2

## Sheet: Cluster 2
DAVID functional clustering of genes in cluster 2 in splenic transcriptome of TMEV-infected mice
Cluster #	Pathway	Enrichment Score	Gene IDs
1	immunoglobulin-like fold	4.68532	Trav13-3, Lrrn2, Ighv1-77, Ighv1-62-2, Wfikkn1, Trav3n-3, Gpnmb, Trav13d-3, Obscn, Igkv9-120, Igkv4-72, Trav13-2, Trav13n-4, Trav13n-4, Trdv4, Il1rl2, Rimbp3, Trav9d-2, Trdv5, 9830107B12Rik, Ncan, Fcamr, Psg16, Trav13-1, Pigr, Ighv11-2, Trav3d-3, Trav6-5, Trbv26, Trbv23, Ighv12-3, Trav16, Mog, Trav9n-2, Trav14n-1
2	extracellular space	3.20825	Gabrg1, Clgn, Trav13-3, Npff, Lrrn2, Il27, Tmed6, Impg2, Rln3, Igkv4-72, 1810010H24Rik, Trav13n-4, Trav13n-4, Calcb, Gm10974, Gm10974, 9830107B12Rik, Tmed11, Serpina11, Col9a1, Mcpt4, F12, Pthlh, Ntf3, Syna, Kremen2, Gpnmb, Igkv9-120, Trav13-2, Trav9d-2, Angpt4, Chrne, Tecta, Dhrs9, Ccl6, Car12, Fxyd3, Ncan, Fcamr, Trav13-1, Grid2, Lrrc3b, Pigr, Trav3d-3, Dusp13b, Gh, Trav6-5, Comp, Klk4, Ighv12-…
3	cell differentiation	1.48409	Piwil4, Pgf, Tdrd1, Trp73, Radil, Brdt, Clgn, Slit1, Spata46, Pax6, Hormad1, Ngef, Armc2, Cpne5, Hfm1, Tesmin, Insm1, Scx, Obscn, Adgb, Styk1, Lhx1, Rimbp3, Foxq1
4	ion transport	1.36754	Gabrg1, Ano7, Slc9b1, Kdelr3, Kcnq3, Cacng7, Slc6a16, Ngb, Mcub, Apoa4, Slc1a7, Rab17, Slc27a2, Stx19, Apod, Slc26a10, Snap91, Tnfaip8l3, Stra6, Abca17, Slc10a6, Chrne, Fxyd2, Slc14a2, Slc29a2, Fxyd3, Rasl2-9, Aqp4, Lin7b, Grid2, Slc1a1, Slc38a11, Slc18a1, Slc4a11, Slc6a7, Grik4
5	piRNA metabolic process	1.34129	Piwil4, Tdrd1, Henmt1, Gpat2
6	symporter activity	1.32946	Slc10a6, Slc1a1, Slc4a11, Slc6a16, Slc6a7, Slc1a7
7	cell differentiation	1.18531	Piwil4, Pgf, Tdrd1, Trp73, Radil, Brdt, Clgn, Slit1, Spata46, Pax6, Hormad1, Ngef, Armc2, Cpne5, Hfm1, Tesmin, Insm1, Scx, Obscn, Adgb, Styk1, Lhx1, Rimbp3, Foxq1
8	Cleavage on pair of basic residues	1.16002	Gdf15, Rln3, Npff, Gal, Pthlh, Calcb, Ntf3, Syna
9	Src homology-3 domain	1.03536	Caskin1, Stac3, Noxa1, Obscn, Map3k21, Stac2, Rimbp3, Ngef

## Sheet: Cluter 3
DAVID functional clustering of genes in cluster 3 in splenic transcriptome of TMEV-infected mice
Cluster #	Pathway	Enrichment Score	Gene IDs
1	ion transport	4.73758	Gm28035, Slc7a3, Cacna1d, Chrna2, Chrnb2, Kcna4, Slc27a6, Slc38a4, Scn3a, Slc35f3, Slc4a10, Mup3, Cnga1, Cacng4, Kcnma1, Ap1m2, Kcnj9, Atp6v0a4, Ucp3, Pgap1, Scn2a, Slc25a43, Kcnh5, Slc10a5, Clca3a1, Kcnj14, Cacna1c, Slc26a11, Slc17a7, Trpv6, Rbp4, Gabrr2, Abra, Slco1a5, Slc13a1, P2rx5, P2rx2, Ift25, Rab4a, Cacna1i, Trpc4, Kcna6, P2rx6, Kpna7, Kcnc2, Chrnb4, Vps25, Bbs7
2	synapse	4.6799	Tmem240, Chrna2, Adora1, Chrnb2, Cadm2, Espn, Slc4a10, Pcdhb16, Rac3, Hapln1, Prrt2, Dnm3, Myrip, Homer2, Mir221, Cttnbp2, Ppp1r9a, Syn2, Dgki, Gsg1l, Anks1b, Lrfn3, Grid2ip, Cacna1c, Shisa7, Shisa9, Slc17a7, Gabrr2, Ptprz1, Nrcam, Phactr1, Kcnc2, Shisa6, Lrrc4c, Chrnb4, Col13a1, Adora2b, Syt1
3	metal ion binding	3.53276	Gm14434, Stox1, Auts2, Fsd1, Gm14308, Mamld1, Gm2026, Zfp2, Zfp989, Fbp1, Tgfa, Armc12, Ctnnd2, Spata33, Zfp825, Sycp1, Camkk1, Pnma2, Mettl18, Gm2007, Zfp111, Olig3, Dgki, H3c13, Tmem170, Mok, Pbx4, Zfp456, Npas2, Pld6, Fhl5, Larp7-ps, Zfp97, Zfp82, Lgals12, Zfp235, Bex2, Phactr1, Satb1, Kpna7, Meioc, Gm14295, Cdkl4, Nap1l3, Bbs7, Sox10, Ppargc1b, Zfp534, Ube2frt, Cacna1d, Fgf11, Zfp449, Tdrp, E…
4	Membrane	2.51192	Oscar, Tex101, Ccr1l1, Scn3a, Slc35f3, Fads6, Abhd3, Rac3, Gm21103, 1700028J19Rik, Dgki, Pgap1, Vmn2r84, Smim8, Awat2, Gng7, Lhfpl1, Cyp27b1, Slc13a1, Rab4a, P2rx6, Pcdhb7, Bbs7, Tmem179, Efna4, Clmn, Tmem178, Ier3, Adam21, Pcdhb16, D430019H16Rik, Ap1m2, B4galnt3, Ptpn3, Kcnj14, Mpzl2, Gabrr2, Galr2, Trpc4, Kcna6, Gpr160, Wdpcp, Agmo, Lrrc4c, Rnf222, Eda, Galnt14, Mpp3, Fbp1, Tgfa, Kcna4, Cadm2, …
5	postsynaptic density membrane	2.4066	Nrcam, Prrt2, Lrfn3, Cacng4, Cacna1c, Shisa7, Shisa9, Lrrc4c, Shisa6, Gsg1l, Ptprz1
6	Voltage-dependent potassium channel	2.2377	Cacna1i, Cacna1c, Cacna1d, Kcnma1, Kcnc2, Trpv6, Scn2a, Scn3a
7	triplet codon-amino acid adaptor activity	2.09594	mt-Ty, mt-Tp, mt-Tq, mt-Ta, mt-Tn, mt-Tw
8	neuronal action potential	2.09263	Cacna1i, Cacna1c, Cacna1d, Kcnma1, Kcnc2, Trpv6, Scn2a, Scn3a
9	growth factor activity	2.09023	Amelx, Vegfc, Prl2c3, Osgin1, Angptl3, Fgf16, Fgf11, Amh, Tgfa, Bmp7, Fgf17, Fgf13
10	cell adhesion	1.99135	Amelx, Pcdhb22, Dsg3, Ctnnd2, Epha1, Cadm2, Pcdhb16, Pcdhb3, Hapln1, Pcdhb21, Itgae, Spon2, Lrfn3, Angptl3, Cdh24, Nphs1, Mpzl2, Pcdhb18, Epha2, Nrcam, Dab1, Flrt1, Egfl6, Mybpc2, Col13a1, Pcdhb7, Pcdhb20
11	Immunoglobulin-like fold	1.9058	Fsd1, Islr2, Oscar, Ighv1-63, Trav6d-6, Cadm2, Sirpb1a, Lrrn4cl, Trav6-6, Ighv7-1, H2-Ea, Alpk2, Trgv5, Myom3, Trav14n-3, Trav14n-3, Il11ra3, Clca3a1, Hydin, Lrfn3, Hc, Nphs1, Epha2, Trav12d-2, Ighv3-3, Trav6d-7, Igha, Igkv4-60, Igkv4-71, Trav12-3, Clmp, Epha1, Trav12d-1, Hapln1, Trav12n-2, Trav7-6, Trav6-7-dv9, Cd101, Alpk3, Phyhipl, Igkv3-7, Mpzl2, Mybphl, Ptprz1, Trav14d-1, Nrcam, Flrt1, Ighv1…
12	multicellular organism development	1.86424	Eda, Amelx, Islr2, Ccdc120, Ctnnd2, Epha1, Bmp7, Fgf17, Hey1, Ascl2, Ripply3, Boll, Mturn, Chrd, Alpk3, Greb1, Vegfc, Wnt4, Hydin, Fzd9, Cdh24, Rnf17, Wnt5b, Cxcl17, Wnt7a, Nphs1, Dync2li1, Gcm2, Draxin, Epha2, Dab1, Flrt1, Egfl6, Khdc3, Col13a1
13	extracellular region	1.8565	Eda, Hhipl2, Amelx, Dnase2b, Prl2c3, Corin, Fgf16, Tgfa, Tex101, Crisp3, Pla2g10, Mettl24, Hyal1, Chrd, Dand5, Spon2, Lum, C1qtnf3, Eva1c, Spock3, Il10, Hc, Wnt5b, Wnt7a, Pcsk9, Amh, Chgb, Ovgp1, Fgf11, Kif27, Bmp7, Fgf17, Mup3, Krt10, Hapln1, Spx, Ghrl, Fgf13, Wnt4, Vegfc, Angptl3, Cxcl17, Dnaaf11, Olfml2a, Rbp4, Draxin, Ptprz1, Nrcam, Flrt1, Egfl6, Fam180a, Hpse2, Tafa5, Apoo, Prss29
14	regulation of short-term neuronal synaptic plasticity	1.79435	Slc4a10, Shisa7, Shisa9, Shisa6
15	postsynapse	1.78029	Slc4a10, P2rx6, Fzd9, Ghrl, Slc17a7, P2rx2, P2rx5
16	Ion transport domain	1.71829	Cacna1c, Cacna1d, Trpv6, Kcna4, Scn3a, Cacna1i, Cnga1, Trpc4, Kcna6, Kcnma1, Kcnc2, Scn2a, Kcnh5
17	ANK 1	1.50351	Asb16, Trpc4, Anks1b, Asb4, Fem1al, Cttnbp2, Dgki, Trpv6, Ankmy1, Espn
18	calcium ion transport	1.4869	Cacna1i, Trpc4, Cacng4, Cacna1c, Cacna1d, Ccr1l1, Trpv6, Chrnb2, Cyp27b1
19	Leucine-rich repeat	1.30433	Lrrc36, Gm28035, Lrfn3, Islr2, Lrrc75b, Dnaaf11, Lrch2, Lrrc19, Elfn1, Lrrc63, Flrt1, Fam89b, Lrrc4c, Xrra1, Lum
20	synaptic vesicle	1.25419	Prrt2, Cttnbp2, Syn2, Dgki, Slc17a7, Ptpn5, Syt1, Npy1r
21	Chemical carcinogenesis - receptor activation	1.2378	Cacna1c, Cacna1d, Fgf16, Kpna7, Chrnb2, Chrnb4, Esr2, Fgf17, Ugt1a6a
22	chemical synaptic transmission	1.22599	Pcdhb16, Cacna1c, Kcnma1, Chrna2, Slc17a7, Chrnb2, Chrnb4, Gabrr2, P2rx2
23	cilium	1.20745	Kif27, Pde1c, Dnaaf11, Dync2li1, Ajm1, Esr2, Odad1, Galr2, Ift25, Dnah12, Cfap44, Wdpcp, Kif3a, Bbs12, Gpr83, Bbs7, Mok
24	Cholinergic synapse	1.08261	Kcnj14, Gng7, Cacna1c, Cacna1d, Chrnb2, Chrnb4
25	Lipoprotein	1.05062	Wnt4, Efna4, Corin, Gng7, Grid2ip, 1700019D03Rik, Tgfa, Tex101, Wnt5b, Wnt7a, Adora1, Nphs2, Prnd, Avpr1a, Rac3, Rhebl1, Rab4a, Kcna6, Kcnma1, Ghrl, H3c13, Adora2b, Syt1, Npy1r
26	sodium ion transport	1.01608	Slc4a10, Slc10a5, Slc17a7, Slc38a4, Slc13a1, Scn2a, Scn3a, Fgf13
27	MAPK signaling pathway	1.00795	Rac3, Vegfc, Cacna1i, Efna4, Cacng4, Cacna1c, Cacna1d, Fgf16, Tgfa, Ptpn5, Fgf17, Epha2

## Sheet: Cluster 4
DAVID functional clustering of genes in cluster 4 in splenic transcriptome of TMEV-infected mice
Cluster #	Pathway	Enrichment Score	Gene IDs
1	extracellular space	9.41936	Ptprt, Prss50, Crtac1, Trav9-4, Lrig3, C8a, Cpb1, Trav8n-2, Trav8n-2, Ly6g6e, Ism1, Eqtn, Gabre, Reg1, Gm5409, Ear6, Ucn2, Omd, Ifnk, Try10, Creg2, Col10a1, Gc, Lypd6, Sfrp5, Cela2a, Ptprn2, Apoa2, Dhrs11, Cela1, Ly6m, Klk1b5, Cela3b, Cxcl3, Slc22a12, Cpa6, Scgb3a1, Cpa2, Amy2a5, Epx, Rnase1, Trav13d-2, Prss3b, Oaf, Zg16, Cntn3, Pamr1, Vit, Icam4, Pon1, Ptprr, Tas1r1, Fam209, Nmb, Chrna1, Pnliprp…
2	hydrolase activity	7.81681	Ptprt, Cela3a, Slfn14, Amy2a1, Klk1b9, Prss50, Fahd1, Pnlip, Naaladl1, Cpb1, Ctrb1, Nt5el, Prss1l, Capn9, Tpsg1, Pde6a, Ear6, Apex2, Kel, Try10, Aspg, Dusp8, Cpa1, Rsph10b, Usp13, Mmp7, Cela2a, Ptprn2, Cela1, Ces2b, Ctrc, Prss2, Klk1b5, Cela3b, Cpa6, Ear1, Cpa2, Amy2a5, Pm20d2, Baat, Rnase1, Ctrl, Prss3b, Gda, Ankrd9, Try5, Pon1, Ptprr, Mmel1, Hagh, Ang, Bpgm, Cel, Tpsb2, Phospho1, Glb1l3, Pnlipr…
3	Glycoprotein	4.8722	H2bc27, Ptprt, Sertm2, Aqp1, Prss50, St3gal5, Cnga2, Plppr4, Lrig3, C8a, Naaladl1, Nt5el, Eqtn, Gabre, Reg1, Mfrp, Ucn2, Omd, Mfsd13a, Creg2, Fut2, Gc, Lypd6, Cyp1a1, Gpr21, Slc43a1, Ptprn2, Slc34a1, Cela1, Steap3, Slc38a5, Ly6m, Tspan33, Klk1b5, Slc22a12, Cpa6, Epx, Slc22a13, Ano9, Cntn3, Pamr1, Vit, Icam4, Pon1, Ptprr, Abcg2, Tas1r1, Kcnmb1, Ltb4r2, Mmel1, Chrna1, Slc28a1, Tmem130, Cel, Gypa, S…
4	heme binding	4.49563	Hbq1b, Bco2, Hba-a1, Steap3, Hba-a2, Hbq1a, Fech, Cyp4a31, Hbb-bt, Epx, Alox15, Cyp1a1, Hbb-bs, Fa2h, Cyp4a10, Slc25a37, Pir
5	porphyrin-containing compound biosynthetic process	3.69054	Urod, Sptb, Spta1, Ank1, Cpox, Fech, Hmbs
6	alpha-amylase activity	2.72573	Amy2a2, Amy2a3, Amy2a1, Amy2a4, Amy2a5
7	metallopeptidase activity	2.5225	Cpa2, Naaladl1, Cpb1, Cpa1, Mmel1, Cpa6, Mmp7, Kel
8	ammonium transmembrane transport	2.07942	Rhag, Aqp1, Rhd
9	Nucleophile	1.86466	Aldh1a7, Pnliprp1, Amy2a5, Aldh1a1, Phospho1, Glb1l3, Pnliprp2, Pnlip, Usp13
10	defense response to Gram-positive bacterium	1.60318	Ear1, Zg16, Ang, H2-M10.2, Ear6, Rnase1, Mmp7
11	actin binding	1.53796	Fscn2, Slc4a1, Add2, Sptb, Spta1, Dmtn, Adcy8, Myo1a, Fhdc1, Snca, Ang, Pfn4, Gc
12	Neutrophil extracellular trap formation	1.32051	H2bc27, H2bc24, H3c2, H2bc7, H3c6, H2bc23, Aqp9
13	Chromosome	1.24406	H1f1, H2bc27, H2bc24, Kash5, H1f5, Rnf212, H3c2, H2bc7, H3c6, H1f3, H2bc23
14	lipid transport	1.16325	Apol7a, Yjefn3, Ano9, Apoa2, Slc25a21, Abcg2, Apol8
15	transmembrane transporter activity	1.09961	Slc43a1, Slc4a1, Aqp1, Slc16a10, Slc22a13, Slco1b2, Slc2a4, Slc22a12
16	Membrane	1.04941	Ptprt, Sertm2, Dnaja4, Fam210b, Aqp1, Pacsin3, Prss50, Prxl2a, St3gal5, Cnga2, Adcy10, Mgst3, Plppr4, Epb42, Gm10371, Gm10371, Lrig3, Cacna1g, C8a, Asb5, Naaladl1, Nt5el, Ly6g6e, Unc80, Apol8, Aqp9, Eqtn, Tmem239, Gabre, Mfrp, Tmem196, Gjb5, Mfsd13a, Cln8, Rtl1, Hrct1, Gng8, Fut2, Mtcl1, Lypd6, Cyp1a1, Tmem266, Gpr21, Slc43a1, Ptprn2, Add2, Slc34a1, Tmem102, Steap3, Sybu, Tmem53, Slc38a5, Ly6m, T…

## Sheet: Cluster 5
DAVID functional clustering of genes in cluster 5 in splenic transcriptome of TMEV-infected mice
Cluster #	Pathway	Enrichment Score	Gene IDs
1	Mitochondrion	38.8943	Sdhd, Cox7b, Hccs, Atad3a, Casq1, Slc25a33, Coa7, Mtx2, Akr7a5, Mrpl37, Slc25a34, Pnpt1, Glod4, Arl2, Plscr3, Acot13, Naxe, Ttc5, Ckb, Gstp1, Echs1, Abcb8, Eci1, Mtch1, Fars2, Tomm70a, Ndufs3, Coq4, Mrps23, Surf1, Mrps18a, Uqcrq, Slc25a45, Timm13, Nubpl, Ndufaf6, Etfa, Slc25a3, Park7, Pdp1, Bckdha, Hap1, Rab5if, Cox7a2l, Lyrm2, Ndufb10, Scp2, Fastkd3, Trmt10c, Oxa1l, Uqcrh, Mrps34, Bckdk, S100a1,…
2	synapse	27.285	Rpl36, Rpl5, Atp1a3, Gnai2, Arf1, Rps27a, Sh3gl1, Ptprn, Tor1a, Coro1a, Dgkq, Gpc1, Tln2, Etv5, Anxa9, Fkbp1a, Pcdh15, Rhob, Git1, Akr1a1, Actg1, Mff, Cacng8, Rpl4, Rplp1, Rpl30, Rps5, Rpl13, Rpl8, Rusc1, Rps2, Hnrnpa1, Rplp0, Rplp2, Sema4b, Atp6v0e2, Rps16, Sigmar1, Acta2, Ninj1, Rps24, Ap2s1, Rpl26, Rps25, Rabac1, Sumo1, Flot2, Slc4a8, Rpl7, Cdh23, Rps12, Atp6v0c, Pi4k2a, Hap1, Rps28, Stx4a, Re…
3	Pathways of neurodegeneration - multiple diseases	16.3523	Sdhd, Cox7b, Ccs, Psmd4, Rps27a, Atf4, Psmc6, Mapk3, Atp5mc3, Map2k1, Ndufa2, Ndufb7, Ndufa3, Slc25a4, Cox6a2, Uqcr10, Psmb5, Sqstm1, Ndufb3, Atg2a, Psma6, Ndufb9, Ndufs3, Tubb3, Camk2g, Psma2, Uqcrq, Psmd7, Ndufa13, Sigmar1, Fzd2, Cox6b1, Atg101, Map2k2, Psma4, Ndufa10, Fzd8, Zfyve1, Dctn3, Park7, Cdk5r1, Hap1, Cox7a2l, Ndufb10, Rela, Uqcrh, Ndufc1, Ndufc2, Psma8, Ndufb11, Cox6c, Cox5b, Psmd8, K…
4	endoplasmic reticulum	7.93634	Irag2, Casq1, Rcn2, Pigs, S100a10, Pigf, Hmgcr, Pmel, Adpgk, Cnpy3, Ckap4, Aldh3a1, Fmo1, Mcrs1, Pigt, Jkamp, Retsat, Alg8, Eif2b2, Fitm2, Rpl13, Fkrp, Retreg2, Reep5, Ccdc115, Trappc9, Mgrn1, Pcsk7, Rbmx2, Map2k2, Clec2i, Faf1, Park7, Hap1, Rab5if, Trappc3, P3h4, Tmed5, Scp2, Hacd2, Stub1, Armc10, Dnajc18, Rpl10, Cers5, Dad1, Scd3, Rps7, Slc22a21, Slc39a13, Mzb1, Nsg1, Ufm1, Atp10a, Agtrap, Sil1…
5	methyltransferase activity	4.6541	Mettl25, Dph5, Setd6, Vcpkmt, Coq5, Prmt5, Prmt6, Coq3, Dimt1, Setd1a, Prdm5, Smyd2, Nsun2, Bmt2, Trmt61a, Eef2kmt, Eef1akmt1, Trmt10c, Fbl, Ece2, N6amt1, Mettl21a, Ehmt2, Eef1akmt2, Trmt1, Antkmt, Smyd4, Ciapin1, Mettl17, Mettl13, Kmt2b, Mettl2, Mepce, Prmt2, Emg1, Bud23, Cmtr1, Icmt, Trmt11, As3mt, Spout1, Smyd5, Mettl22, Mettl9, Hemk1, Trmt10b
6	Cardiac muscle contraction	4.52889	Atp1a3, Cox7b, Uqcrc1, Cox7a2l, Cox6a1, Cacna1s, Uqcrh, Cox4i1, Uqcrfs1, Trdn, Cox6c, Cox6a2, Cacng8, Uqcr10, Cox5b, Cox7a2, Tpm3, Cyc1, Uqcrb, Cox5a, Cacng5, Uqcrq, Cox7c, Cacna2d2, Cox6b1, Cacnb4, Hrc, Cox8a
7	proteasome complex	4.03965	Psma4, Psmb5, Psmd8, Psmb1, Zfand2b, Psmb4, Psmd4, Psmd13, Psma7, Psmb7, Psma6, Psmc3, Psmd3, Psmc6, Psma2, Sem1, Psmb2, Psmb6, Psmd7, Psmc4, Psmb10, Psma8, Psma1
8	proteasomal protein catabolic process	4.03854	Psma4, Rnf41, Psmb5, Psmb1, Psmb4, Psma7, Psmb7, Psma6, Pmaip1, Psma2, Prpf19, Psmb2, Psmb6, Psmb10, Psma8, Psma1
9	Ubl conjugation	4.02064	Psmd4, Snrpd1, Orai1, Ptprn, Coro1a, Stx8, Cul7, Coro7, Xrcc1, Atf5, Erf, Lrsam1, Eif4a3, Suds3, Erg, Nop56, Zfp90, Rbbp5, Otulin, Fbxl19, Cbx4, Arid5a, Slx4, Park7, Csrp1, Atp6v0c, Nelfe, Tagln2, Eno1, Trim25, Ebna1bp2, Map7d1, Snip1, Traf7, Stub1, Cul2, Ilf2, Rps7, Ufm1, Sil1, Cmpk1, Trim32, Taf7, Pelp1, Dus3l, Dpy30, Itgb3bp, Mms19, H4c3, Map3k14, Cyba, Rpl19, Cfdp1, Rps3, H3f3b, Lat, Ikbkg, H…
10	mRNA processing	3.99777	Sugp1, Snrpb2, Snrpd2, Thoc6, Rpusd4, Gemin7, Snrpd3, Cwc15, Frg1, Prpf31, Snrpd1, Cstf1, Dus3l, Sf3a3, Tsen54, Ssu72, Rrp1b, Pnpt1, Lsm1, Ess2, Srek1ip1, Nol3, Lsm2, Snrpg, Pabpn1, Wdr83, Snrnp27, Apobec1, Ppih, Alyref2, Puf60, Snrpb, U2af1, Hnrnpa1, Cmtr1, Larp7, Prpf19, Snrpf, Sf3b6, Tsen34, Rbmx2, Sart1, Pcbp1, Cactin, Rbfox3, Fam50a, Snrnp25, Xrn2, Wbp4, Alyref, Bcas2, Supt4a, Ppil1, Cd2bp2,…
11	lysosome	3.53386	Pgap6, Scarb1, Sphk2, Cd63, Slc66a1, Mfsd1, Hgs, Sidt2, Hexa, Abhd6, Tpcn2, Klc2, Ifitm2, Unc13d, Lamtor4, Pip4p1, Spns1, Nprl2, Galns, H2-DMa, Vps18, Tmem9b, Sqstm1, Ldlr, Napsa, Ctso, Klhl22, Tm9sf1, Tcirg1, Scarb2, Cst3, Tmem63a, Ccdc115, Bri3, Dpp7, Slc15a3, Ctla2a, Borcs5, Doc2a, Smpd1, Tmem150c, Atp10b, Mcoln2, Ifitm1, Tfeb, Tasl, Atp6v0c, Itm2c, Hap1, Litaf, Tmem163, Nprl3, Rragc, Wdr24, T…
12	WD40 repeat	3.34308	Vps8, Rbbp7, Scap, Thoc6, Gnb2, Cstf1, Llgl2, Coro1a, Coro7, Dync2i2, Wdr70, Wdr83, Rack1, Nle1, Arpc1b, Dcaf4, Wrap73, Bop1, Edc4, Rbbp5, Prpf19, Llgl1, Eed, Wdr36, Taf5l, Pwp2, Katnb1, Aamp, Fbxw7, Nsmaf, Wdr95, Pex7, Wdr24, Wdr55, Gnb3, Wdr43, Wdr6, Wdr38, Wdr89, Stxbp5l, Traf7, Grwd1, Wsb2, Wdr86, Med16, Eif3i, Gnb1l, Dcaf11, Wdr46, Rae1, Wdr11, Dnai4, Eipr1, Nbeal2
13	U2-type precatalytic spliceosome	3.07776	Rnf113a1, Snrpb2, Snrpd2, Snrpd3, Snrpg, Prpf31, Snrpd1, Wbp4, Sf3a3, Snrpb, Prpf38a, Snrpf, Snu13, Lsm3, Cwc27, Lsm4, Lsm2, Snip1, Rbmx2, Sart1, Lsm7
14	Glycosylphosphatidylinositol (GPI)-anchor biosynthesis	2.92146	Pigu, Pigo, Pigk, Pigs, Pigf, Pigx, Pigh, Pigyl, Gpaa1, Mppe1, Pigt
15	Cytosolic DNA-sensing pathway	2.90359	Pycard, Nfkbib, Irf3, Ikbkg, Polr1d, Polr3e, Polr2f, Ripk3, Polr3h, Nfkbia, Polr2h, Rela, Polr3d, Polr1c, Polr2l, Aim2
16	cellular respiration	2.73334	Ndufs4, Uqcr10, Uqcrq, Slc25a25, Uqcrh, Chchd5, Cyc1, Uqcrc1, Coq10b, Cox10, Uqcrb, Bax
17	Mitochondrial substrate/solute carrier	2.68614	Slc25a33, Slc25a10, Slc25a3, Slc25a11, Slc25a28, Slc25a22, Mtch1, Slc25a34, Slc25a17, Slc25a19, Slc25a26, Slc25a45, Slc25a25, Slc25a1, Slc25a4
18	Lipid biosynthesis	2.5145	Mvk, B4galt5, Idi1, Fdps, Cdipt, Cers6, Dhcr7, Scd4, Mvd, Fdft1, Pecr, Erg28, Hmgcr, Mcat, Ptges2, Ndufab1, Hacd2, Ebp, Hint2, Hacd4, Cyb5r1, Cers5, Scd3, Degs2, Tm7sf2, Agpat3, Cyb5r3, Tecr, Serinc4, Elovl1, Degs1, Pgs1, Agpat1, Lss, Isyna1
19	Hydrogen ion transport	2.51233	Atp6v1f, Atp5mg, Atp5mc1, Atp6v0b, Atp5f1c, Atp6v1g3, Atp5f1d, Atp5pb, Atp5pf, Atp6v0c, Tcirg1, Atp5mf, Atp5f1e, Atp5me, Atp5f1a, Atp6v1e1, Atp5mc3, Atp5mc2, Atp6v0e2, Slc9b2, Atp6v0e
20	ubiquinone biosynthetic process	2.41313	Fdxr, Coq9, Coq5, Coq3, Coq2, Coq10b, Coq7, Coq4, Coq6
21	Golgi apparatus	1.96761	Rab11a, Casq1, Cope, Akr7a5, Scyl1, Pmel, Naa60, Ptprn, Laptm4a, Tmbim4, Mgat1, Arl2, Cog8, Mapk3, Cul7, Spry1, Has3, Coro7, Snx17, Slc35a1, Rab29, Nudc, Fkrp, Rusc1, Trappc9, Pcsk7, Fes, Map2k2, Fzd8, Atp6v0c, Trappc3, Tmed5, Sla2, Litaf, Pkdcc, Pmepa1, S100a1, Slc39a13, Nsg1, Fcgr2b, Agtrap, B3galnt1, Rhou, Slc35a2, Scap, Use1, Zfp622, Sdf4, Lmf1, Zdhhc16, Zdhhc6, Dpy30, Sar1b, Coq6, Ms4a4b, Gi…
22	cellular response to DNA damage stimulus	1.95426	Dcun1d5, Fbxo6, Bmyc, Zdhhc16, Ercc6l2, Cyren, Swi5, Mms19, Gtf2h1, Insl6, Vrk1, Aatf, Exo5, Mapk3, Hdgfl2, Mcrs1, Men1, Rps3, Batf, Fbxo31, Xrcc1, Gtf2h5, Ttc5, Ikbkg, Tex264, Faap100, Faap24, Fancg, Adprs, Brat1, Pnkp, Alkbh2, Cdk9, Zc3h12a, Polk, Rbbp5, Prpf19, Prkcd, Ap5z1, Cib1, Babam1, Rassf1, Fbxw7, Plk3, Slx4, Xrcc5, Nabp2, Prmt6, Park7, Setd1a, Nabp1, Mpg, Pmaip1, Tfpt, Sirt7, Morf4l1, A…
23	iron-sulfur cluster assembly	1.95015	Iscu, Glrx3, Nubp2, Ciapin1, Nubp1, Ndufab1, Lyrm4, Nubpl, Ciao2b, Mms19
24	peroxisome	1.93563	Mvk, Idi1, Fdps, Phyh, Mvd, Pecr, Hmgcr, Tysnd1, Pex19, Scp2, Pex7, Slc25a17, Acot8, Pex11a, Acaa1b, Mff, Serhl, Slc22a21, Paox, Prdx5, Hacl1, Lonp2, Idi2l, Idi2l, Ehhadh, Mpv17l, Fis1, Ech1, Nudt7
25	Proteasome component (PCI) domain	1.89663	Psmd3, Eif3e, Psmd8, Sac3d1, Psmd13, Gps1, Eif3k, Eif3m, Leng8
26	Carbon metabolism	1.87797	Gpi1, Sdhd, Idh3g, Hkdc1, Sdhc, Psat1, Pfkp, Adpgk, Mdh1, Eno1, Pgk1, Aldoa, Phgdh, Echs1, Sucla2, Shmt2, Eno2, Psph, Acads, Csl, Pfkl, Prps2, Eno3, Pgls, Tkfc, Me1, Mcee
27	Protein biosynthesis	1.78114	Gatb, Eif5b, Eif5a2, Eif1a, Eif2b3, Aimp1, Tcea2, Farsb, Aimp2, Vars1, Gars1, Tsfm, Mrrf, Eif6, Eif2a, Tars2, Farsa, Eef1e1, Qars1, Mrpl58, Eif3k, Eif2b4, Eif4a1, Trnau1ap, Eif2b2, Eif3i, Eif1b, Fars2, Eif2b5, Eif3h, Eif4h, Eif3e, Denr, Eef1b2, Rars1, Eif3m
28	Ubiquitin-like	1.75925	Kxd1, Sumo1, Snrnp25, Rbck1, Rps27a, Ubl4a, Ggnbp1, Ubqln4, Sharpin, Bag1, Ublcp1, Tmub1, Elob, Fau, Sumo2, Midn, Nedd8
29	calcium-dependent protein binding	1.73661	Nsmf, Calm2, S100g, S100a4, S100a8, S100a10, Anxa3, S100a6, Calm3, S100a13, Vps37c, S100a9, Pdcd6, Anxa1, Slc24a4, S100a11, Anxa7, Vps37b, Anxa6, Plscr3, S100a1, Cln3
30	Band 7 protein	1.7072	Stoml1, Phb2, Flot2, Stoml2, Phb1, Flot1
31	COPII vesicle coating	1.68967	Trappc4, Trappc6a, Trappc1, Trappc3, Trappc2l, Pdcd6, Trappc5
32	NADH dehydrogenase (ubiquinone) activity	1.65972	Ndufa10, Ndufs4, Ndufs8, Ndufs2, Ndufb7, Ndufa2, Ndufa13, Ndufs7, Ndufs3
33	Actin-binding, cofilin/tropomyosin type	1.64138	Cfl1, Gmfg, Cotl1, Twf2, Dbnl
34	CHCH	1.59035	Chchd7, Ndufb7, Chchd10, Ndufa8, Chchd1, Cox6b1, Cox17, Ndufs5
35	negative regulation of amyloid fibril formation	1.54771	Vbp1, Pfdn6, Pfdn5, Ldlr, Apoe, Pfdn2
36	iron-sulfur cluster binding	1.49259	Glrx3, Ndufs8, Ciapin1, Dph2, Fdx1, Ndufs7, Iscu, Mocs1, Bola2, Exo5, Nubp2, Nubp1, Ndufs2, Uqcrfs1, Nubpl, Ddx11, Ercc2
37	HCFC1-binding motif (HBM)	1.49251	Thap4, Thap11, Thap7, Setd1a, Thap1
38	Alpha/beta hydrolase fold-1	1.47811	Abhd14a, Abhd8, Abhd16b, Abhd16a, Serhl, Abhd6, Lipk, Mest, Abhd11
39	sarcoplasmic reticulum	1.47017	Akt2, Casq1, Tmem109, Hax1, Jph1, Reep5, Camk2g, Cacna1s, Dmpk, Pomt1, Pln, Nol3, Pygm, Fkbp1a, S100a1, Trdn
40	ubiquitin ligase inhibitor activity	1.44717	Rpl5, Rps20, Rps15, Rps7, Rpl11, Rpl37
41	pyrimidine nucleotide-sugar transmembrane transport	1.44632	Slc35a2, Slc35a1, Slc35a4, Slc35a5
42	ubiquitin ligase inhibitor activity	1.43244	Rpl5, Rps20, Rps15, Rps7, Rpl11, Rpl37
43	FUZ/MON1/HPS1 first Longin	1.40065	Fuz, Mon1a, Hps1
44	Nop domain	1.40048	Nop58, Prpf31, Nop56
45	mRNA surveillance pathway	1.37235	Ppp2r1a, Upf1, Eif4a3, Pabpn1, Alyref2, Cstf1, Alyref, Ssu72, Ppp1ca, Pym1, Smg5, Upf3b, Upf3a, Nxt1, Rnps1, Ddx19b
46	nucleic acid binding	1.35671	Snrpb2, Pop7, Sf3a3, Pnpt1, Rexo1, Nkrf, Eef1akmt1, E130201H02Rik, Pinx1, Srek1ip1, Rbm34, Rbm46, Rbm46, Gpatch3, R3hcc1l, Eif4a3, Npm1, Pabpn1, Puf60, Alyref2, U2af1, Eif4h, Hnrnpa1, Cmtr1, Rpp25l, Rbmx2, Rexo2, Zfp407, Tcea2, Rbfox3, Toe1, Zfp593, Nelfe, Exosc10, Rnps1, Dazl, Zcchc10, Ercc2, Rbm3, Eif4a1, Tigd2, Rnase6, Nifk, Snrnp35, Ascc1, Hnrnpd, Foxa2, Polr2i, Dnajc17, Sugp1, Ddx49, Zfp622,…
47	Pyrimidine metabolism	1.35019	Cmpk1, Dctpp1, Nudt2, Nme2, Nme4, Nme1, Hddc2, Uck2, Uck1, Nme6
48	negative regulation of cardiac muscle hypertrophy	1.32965	Glrx3, Notch1, Tnfrsf1a, Tnfrsf1b
49	nucleobase-containing compound metabolic process	1.28823	Cmpk1, Rexo2, Exosc10, Ak1, Ak2, Bloc1s6, Xrn2, Polr3h, Ak7, Atrip, Ddx11, Ercc2
50	proteasome accessory complex	1.28469	Psmd3, Psmc6, Psmd8, Psmd4, Psmc4, Psmd13, Psmc3
51	SREBP signaling pathway	1.27922	Scap, Srebf1, Arhgef10l, Srebf2, Hmgcr, Eif2a
52	Carbohydrate metabolism	1.27044	Pygb, Akt2, Ugdh, Rbks, Khk, Gsk3a, Phka2, Pgm1, Pgm3, Gnpda2, Mlec, Pygl, Neu1, Dcxr, Ppp1ca, Akt1, Galk1, Phkg2, Pygm, Amdhd2
53	calcium channel regulator activity	1.26494	Cacng8, Rrad, Rem1, Gnb2, Gem, Stimate
54	WW domain binding	1.26457	Traf4, Wbp1, Shisa5, Ndfip2, Pmepa1, Dazap2, Litaf
55	Important for catalytic activity	1.23584	Ehhadh, Dis3l2, Echs1, Ech1, Adtrp, Gfus, Eci1, Apex1, Gyg1, Dgat1
56	regulation of release of sequestered calcium ion into cytosol by sarcoplasmic reticulum	1.23129	Calm2, Casq1, Pln, Camk2d, Calm3, Nol3, Hrc, Trdn
57	Metal-binding	1.22368	Sdhd, S100a4, Adam8, S100a6, Hddc2, Adpgk, Exo5, Alkbh4, Thap1, Zfp768, Lrsam1, Fgd2, Apobec1, Itga7, Ampd2, Amhr2, Zfp90, Nubpl, Zfp653, Fbxl19, Map2k2, Mvk, Slx4, Def8, Tyw5, Phyh, Pdp1, Csrp1, Bckdha, Zfp593, Scrt2, Eno1, Trim25, Gm49322, Adh4, Traf7, Repin1, Lta4h, Car14, S100a1, Smyd4, Acy1, Scd3, Atp10a, Dusp12, Ndufs2, Zfp277, Rhou, Gtf3a, Trim32, Zfp212, Steap1, Wtip, Lancl1, S100a8, Trim…
58	nascent polypeptide-associated complex	1.20308	Nacad, Btf3, Naca
59	Pentose phosphate pathway	1.20257	Aldoa, Gpi1, Rbks, Pgm1, Pgls, Pfkp, Dera, Pfkl, Prps2
60	calcium-dependent phospholipid binding	1.19068	Anxa1, Pla2g4f, Anxa7, Anxa3, Anxa6, Doc2a, Anxa9, Syt3, C2cd5
61	transmembrane transporter activity	1.18656	Timm23, Mfsd10, Slc2a1, Slc4a8, Mfsd1, Sfxn1, Slc2a12, Slc16a13, Slc7a11, Slc2a6, Slc5a11, Spns1, Slc5a6, Slc16a3, Cnnm4, Slc2a3, Slc2a10, Slc2a8, Slc37a1, Slc22a21, Slc22a17, Slc25a22, Slc45a3, Slc35b1, Slc15a3, Slc25a45, Slc35b2, Slc7a6, Slco1c1
62	peptidyl-prolyl cis-trans isomerase activity	1.16662	Aip, Ppihl, Ppif, Cwc27, Ppib, Pin1, Ppih, Fkbp8, Fkbp1a, Fkbp2, Ppil1
63	KOW	1.16011	Rps4x, Rpl26, Rpl27, Mrpl24
64	regulation of release of sequestered calcium ion into cytosol by sarcoplasmic reticulum	1.14985	Calm2, Casq1, Pln, Camk2d, Calm3, Nol3, Hrc, Trdn
65	S4 RNA-binding	1.1462	Rps9, Imp3, Rps4x
66	histone deacetylase complex	1.12994	Rcor2, Rbbp7, Hdac8, Sap30, Arhgef10l, Sap30l, Hdac3, Sin3b, Hdac5, Hdac7, Hint1
67	Redox-active center	1.12666	Mien1, Txn2, Prdx1, Prdx4, Txndc12, Txnrd1, Txn1, Prdx5, Selenow, Txndc5, Txndc17, Prdx6b, Msra
68	Cysteine and methionine metabolism	1.12219	Srm, Cth, Phgdh, Ahcyl, Ahcyl, Psat1, Mri1, Ahcy, Mdh1, Ldha
69	Zinc finger, TRAF-type	1.119	Traf4, Traf5, Zftraf1, Traf7, Fbxo40
70	NUDIX hydrolase domain-like	1.11724	Nudt16, Nudt9, Nudt14, Idi1, Nudt1, Nudt2, Nudt16l1, Nudt6, Nudt7, Mrpl46
71	Ribosomal protein S5 domain 2-type fold	1.1161	Lonp2, Mvk, Rps2, Galk1, Gm6139, Rps16, Mvd, Lonp1, Pnpt1
72	positive regulation of transcription initiation from RNA polymerase II promoter	1.09985	Med16, Srf, Med28, Med21, Taf10, Med27, Nfkbia, Med29, Med24, Sub1, Med22, Nkx2-5, Med30, Taf7, Znhit1
73	Nuclease	1.09819	Rexo2, Usb1, Exosc3, Sgip1, Xrn2, Myg1, Pnpt1, Mrpl44, Rexo1, Dxo, Endou, Exosc10, Aen, Exo5, Dnase1l1, Elac2, Lactb2, Nob1, Eri3, Dis3l2, Tatdn3, Rnase6, Trir, Zc3h12a, Rnaseh1, Endog, Apex1
74	ribonuclease MRP complex	1.09013	Pop1, Pop5, Rpp38, Pop7, Rpp25l
75	Tetraspanin/Peripherin	1.08996	Tspan5, Tspan14, Cd63, Tspan31, Cd82, Cd151, Cd37, Tspan3
76	canonical glycolysis	1.08345	Aldoa, Gpi1, Pfkp, Eno2, Eno3, Pfkl, Eno1, Pgk1
77	protein N-linked glycosylation	1.07999	Alg12, Ost4, Alg8, Pgm3, Dad1, Fut8, Krtcap2, Mlec, Pmm2, Mgat1, Ostc, Mgat4b, Mogs
78	palmitoyl-(protein) hydrolase activity	1.07235	Abhd16b, Lypla2, Abhd16a, Abhd12, Abhd17a, Abhd17c
79	protein targeting to vacuole	1.06328	Rnf215, Vps8, Mon1a, Vps37b, Vps37d, Vps37c
80	T cell receptor signaling pathway	1.03051	Nfkbib, Ppp2r1a, Akt2, Ppp3cc, Ikbkg, Pak3, Cd28, Pdcd1, Cd4, Cd3g, Nfkbia, Zap70, Map2k7, Map3k14, Akt1, Lck, Rela, Mapk3, Cdk4, Map2k1, Lat, Map2k2
81	regulation of release of sequestered calcium ion into cytosol by sarcoplasmic reticulum	1.0249	Calm2, Casq1, Pln, Camk2d, Calm3, Nol3, Hrc, Trdn
82	transferase activity, transferring glycosyl groups	1.02452	B4galt5, Pygb, Hprt1, Colgalt1, Pomgnt1, B3gntl1, B4galnt1, Mgat1, Sec1, Xylt2, Pomt1, Parp2, Has3, Pygm, Mgat4b, St6galnac5, Tiparp, Gyg1, Pomt2, Alg12, Alg8, Gcnt2, Fut8, B4galt4, Aprt, St8sia2, St6galnac6, Pygl, B3galnt1, Alg3, Plod3, Galnt18, Gtdc1, Chpf, B3galt4, Qprt, Alg1
83	Ferredoxin reductase-type FAD-binding domain	1.01852	Cyb5r4, Cyb5r3, Cyb5r1, Cyb5rl, Nox1
84	telomerase RNA binding	1.01301	Tert, Nop10, Snrpd3, Smg5, Pinx1, Nhp2, Snrpb
85	GroES-like	1.01196	Cryzl2, Cryz, Adh4, Cryzl1, Ptgr1, Rtn4ip1
86	protein targeting to membrane	1.00931	Zdhhc4, Nacad, Vps37b, Zdhhc19, Zdhhc6, Vps37d, Zdhhc7, Vps37c, Ncf1, Naca, Zdhhc12
87	myosin phosphatase activity	1.003	Ppp3cc, Ppp5c, Ssh3, Ctdsp1, Dusp23, Ppef1, Dusp2, Ppm1m, Ssu72, Ublcp1, Ppp1ca, Dusp28, Ctdnep1, Ppp4c

## Sheet: Cluster 6
DAVID functional clustering of genes in cluster 6 in splenic transcriptome of TMEV-infected mice
Cluster #	Pathway	Enrichment Score	Gene IDs
1	innate immune response	26.876	Igll1, Fcgr1, Iigp1, Usp44, Ighv14-2, Ighv1-85, Herc6, Tlr7, Tlr3, Oas1a, Ighv14-4, Tgtp2, Trim34b, Parp14, Klrk1, Ifit1, Nlrc5, Uba7, Gbp4, Oasl1, Trim34a, Trim30d, Bst2, Irgm1, Gm43302, Mx1, Rigi, Gbp7, Trim30b, Oas1g, Trim43c, Ighv14-1, Adgrb1, Oas3, Ifi35, Ifitm3, Ifi27, Irf7, Adar, Dtx3l, Zbp1, Ifit2, Ighv1-19, Isg15, Parp9, Trim30a, Pml, Igtp, Oasl2, Oas2, Eif2ak2, Ifih1, Mx2, Oas1b, Ifi202…
2	response to virus	12.6795	Oas3, Ifi27l2a, Ifitm3, Oas1h, Adar, Tbx21, Ifitm7, Ifit2, Tlr3, Isg15, Oas1a, Tgtp1, Ifit1, Oasl1, Oas2, Oasl2, Mx2, Eif2ak2, Ifih1, Bst2, Oas1b, Ifit3b, Mx1, Rigi, Oas1g, Ifit3, Dhx58, Ddx60
3	positive regulation of interferon-beta production	9.36178	H2-T22, Oas3, H2-Q7, Irf7, Stat1, H2-T10, Tlr3, Oas1a, Pml, Oas2, Eif2ak2, Ifih1, Bst2, Irf9, Oas1b, Zim1, Rigi, Stat2, H2-Q6, Ccl5, Oas1g, Daxx, Tap1, H2-T5, H2-T24
4	double-stranded DNA binding	8.95869	Ifi207, Ifi206, Ifi213, Ifi35, Oasl1, Adar, Stat1, Ifi208, Sapcd2, Ifi211, Ifi202b, Ifi214, Mndal, Daxx, Ifi209, Ifi203, Ifi204, Ifi205, Spats2l, Pml, Rnf213
5	interferon-inducible GTPase	8.59669	Cspg5, Cyp21a1, Iigp1, Gm12185, Mmp27, Tlr7, Tlr3, Tgtp1, Ifi47, Tgtp2, Iigp1c, Mrap, Slc16a11, Uchl1, BC016579, Igtp, Gm4841, Mfsd2a, Oas1b, Gm5431, Cyp3a13, Irgm1, Mx1, Irgm2, F830016B08Rik, Tap1
6	negative regulation of viral genome replication	6.3501	Ifi207, Ifi206, Oas3, Oasl1, Ifitm3, Oas2, Oasl2, Mx2, Eif2ak2, Ifih1, Oas1h, Bst2, Oas1b, Ifitm7, Ccl5, Oas1g, Isg15, Oas1a, Ifi204
7	cellular response to interferon-gamma	5.43546	Gbp9, Gbp4, Gbp8, Igtp, H2-Q7, Stat1, Ccl3, Irgm1, Gm43302, Gbp7, Tlr3, Daxx, Ccl5, Ccl4
8	Immunoglobulin-like fold	4.09643	Igll1, H2-T22, Tmem25, Btnl4, Igkv4-74, Igkv4-74, Fcgr1, H2-Q7, Cd300e, Fcgr4, Il18rap, Ighv14-2, Igkv3-1, Slamf9, Ighv1-85, H2-T10, Vcan, Ighv1-19, Igkv9-124, Ighv14-4, Trgv4, Robo3, Igkv12-38, Ceacam18, Igkv18-36, Mdga2, Hmcn2, Ceacam10, Igkv14-130, Siglec1, Ncr1, Pkd1l1, Timd6, Ighv1-81, H2-Q6, Tcam1, Fndc4, Ighv9-4, Igkv3-5, Lif, Ighe, Ighv14-1, H2-T5, H2-Q5, H2-T24, Ighv1-43
9	Glycoprotein	3.61842	Tmem25, Muc20, Klra2, Klra1, Ly6c1, Tor3a, Cspg5, Fcgr1, H2-Q7, Gzma, Fcgr4, Cacna2d3, H2-T10, Tlr7, Tenm1, Hs3st2, Tlr3, Il15, Robo3, Klrk1, Uchl1, Ceacam10, Klre1, Lgals3bp, Cacna1f, Mfsd2a, Bst2, Siglec1, H2bc26, Tmprss2, Sdc3, Pkd1l1, Adgrg7, Slitrk2, Klra7, Cdh6, Vmn2r85, B3galt2, Tnfsf10, Gzmb, H2-Q5, Gpr33, Adgrb1, H2-T24, Ly6a, Klra3, H2-T22, Lpcat2b, a, Cd300e, Gfra3, Il18rap, Ly6c2, Cdh…
10	C-type lectin-like	3.55306	Klrc3, Klrc1, Klra2, Klra1, Klre1, Vcan, Klra7, Klrc2, Klra3, Klrk1, Clec4b1
11	response to interferon-alpha	3.5454	Ifitm3, Eif2ak2, Tgtp1, Adar, Bst2, Ifitm7
12	chloride channel activity	3.34639	Best1, Apol11b, Apol9b, Apol9a, Best3, Apol11a, Apol10a, Apol10b, Slc17a8
13	extracellular space	3.21085	Apol9a, Igkv4-74, Igkv4-74, H2-Q7, Gzma, Fcgr4, Xdh, H2-T10, Sct, Mmp27, Igkv9-124, Il15, Ccl4, Cfhr2, Igkv12-38, Cxcl10, Igkv18-36, Ceacam10, Lgals3bp, Ccl3, Apol9b, Tnfsf10, Gzmb, Adgrb1, H2-T24, Prss34, H2-T22, Ifi35, a, Col23a1, Igkv3-1, Lgals9, Elane, Prss57, Serpinb10, Fstl3, Vcan, Apol10b, Prtn3, Lipg, Serpinb1b, Mmp13, Hmcn2, Ctsg, Igkv14-130, Inhba, Apol11a, Apol11b, Serpina3f, H2-Q6, Fn…
14	Schlafen AlbA-2	3.09681	Slfn8, Slfn9, Slfn4, Slfn5
15	Zinc finger, RING/FYVE/PHD-type	2.62122	Trim69, Pdzrn4, Trim30d, Trim34a, Trafd1, Usp44, Phf11a, Dtx3l, Phf11c, Xaf1, Trim30b, Trim43c, Phf11d, Trim30a, Trim34b, Phf11b, Trim30c, Pml, Rnf213
16	IGv	2.49149	Igkv12-38, Igkv18-36, Hmcn2, Btnl4, Igkv4-74, Igkv4-74, Igkv14-130, Igkv3-1, Ighv14-2, Ighv1-85, Ighv1-81, Vcan, Ighv1-19, Ighv9-4, Igkv3-5, Igkv9-124, Ighv14-4, Ighv14-1, Trgv4, Ighv1-43
17	Human papillomavirus infection	2.27332	H2-T22, Oasl1, Oasl2, Mx2, Eif2ak2, H2-Q7, Stat1, Irf9, H2-T10, Mx1, Stat2, H2-Q6, Tlr3, Isg15, H2-T5, H2-T24
18	receptor complex	2.19212	Klrc3, Klrc1, Tlr7, Gfra3, Klrc2, Pparg
19	Protease	2.06856	Prss34, Uchl1, Ctsg, Gzma, Klk15, Usp44, Tmprss2, Elane, Prss57, Gzmk, Mmp27, Gzmb, Usp18, Prtn3, Mmp13, Astl
20	positive regulation of defense response to virus by host	2.00239	Rigi, Ccl5, Parp9, Stat1, Dtx3l, Pml
21	positive regulation of interferon-alpha production	1.93216	Rigi, Tlr7, Tlr3, Ifih1, Irf7, Stat1
22	Lipoprotein	1.93065	Uchl1, Gnat2, Mdga2, Bfsp1, a, Ly6c1, Ifitm3, Oas2, Bst2, Gfra3, Iigp1, Ly6c2, Ly6i, Irgm1, Aldh3b3, S1pr5, Oas1a, Apol10b, Dsp, Kcna7, Ly6a, Art3
23	immunoglobulin production	1.90265	Igkv12-38, Igkv18-36, Igkv4-74, Igkv4-74, Igkv3-5, Igkv9-124, Ighe, Igkv14-130, Igkv3-1
24	cellular response to lipopolysaccharide	1.82615	Irgm2, Cxcl10, Igtp, Cmpk2, Ctsg, Fcgr4, Stat1, Irgm1, Gm43302, Klrk1
25	positive regulation of interleukin-1 beta production	1.79001	Ifi207, Mndal, Ifi206, Ccl3, Ifi204, Ifi205, Ifi211, Ifi202b
26	Osteoclast differentiation	1.72645	Stat2, Fcgr1, Socs1, Fcgr4, Stat1, Irf9, Pparg
27	Speract/scavenger receptor	1.63804	Lgals3bp, Cd5l, Ssc4d, Tmprss2
28	nucleotidyltransferase activity	1.60802	Oas3, Parp12, Oasl1, Oasl2, Oas2, Oas1h, Parp9, Parp14, Art3
29	inflammatory response	1.37944	Cxcl10, Ccl3, Il18rap, Pparg, Ifi202b, Tlr7, Tlr3, Ccl5, Cd5l, Il15, Ccl4, Gpr33, Chst4
30	RIG-I-like receptor signaling pathway	1.31548	Cxcl10, Rigi, Isg15, Ifih1, Irf7, Adar, Dhx58
31	Immunoglobulin subtype	1.22161	Igkv12-38, Ceacam18, Igkv18-36, Mdga2, Hmcn2, Btnl4, Igkv4-74, Igkv4-74, Fcgr1, Igkv14-130, Fcgr4, Cd300e, Il18rap, Siglec1, Igkv3-1, Slamf9, Ncr1, Timd6, Vcan, Ighv9-4, Igkv3-5, Igkv9-124, Robo3
32	positive regulation of cytokine production	1.10731	Tlr7, Tlr3, Eif2ak2, Il15, Lgals9
33	Toll/interleukin-1 receptor homology (TIR) domain	1.08314	Tlr7, Tlr3, Il18rap

## Sheet: Cluster 7
DAVID functional clustering of genes in cluster 7 in splenic transcriptome of TMEV-infected mice
Cluster #	Pathway	Enrichment Score	Gene IDs
1	lysosome	7.36862	Laptm5, Hck, Pld3, Lgmn, Plbd2, Gns, Man2b2, Grn, Hps4, Lipa, Vps33a, Plaat3, Slc29a3, Pdgfrb, Has2, Pcyox1, Tmem79, Ctsa, Mreg, Cubn, Cd68, Slc17a3, Cd1d2, Hpse, Glb1, Uvrag, Arsb, Gja1, Atp6v1a, Tm6sf1, Minar2, Sec13, Gla, Clcn7, Ctsd, Rubcn, Ncstn, Syt11, Dram1, Src, Elapor1, Ppt1, Pla2g15, Prf1, Plbd1, Vps35, Ctsc, Lamp5, Il1b, Kics2, Slc35f6, Snx1, Unc93b1, Gba1, Ace, Ccz1, Gaa, Naaa, Prdx6,…
2	cellular response to DNA damage stimulus	7.35025	Spata18, Nono, Rev1, Fancm, Tex15, Rad50, Ercc3, Rbbp8, Parp10, Taok3, Cinp, Ints3, Slf1, Rad54l, Poldip2, Rad23b, Fen1, Abl1, Mms22l, Dclre1c, Suv39h1, Shld2, Uvrag, Rif1, Timeless, Nek4, Primpol, Immp2l, Msh3, Fan1, Poli, Chek1, Atm, Mapkapk2, Fam111a, Smchd1, Vcp, Xrcc6, Rad51, Psme4, Pold4, Prap1, Foxm1, Dyrk1b, Alkbh3, Ascc2, Fanci, Casp3, Ticrr, Helq, Ascc3, Dna2, Exo1, Topbp1, Vav3, Pak1, …
3	innate immune response	5.79156	Sertad3, Hck, Card11, Chia1, Slfn2, Cx3cr1, Themis2, Casp4, Clec4a2, Fcer1g, Tlr13, Irf1, Eomes, C1qa, B2m, C2, Xrcc6, C1ra, Zc3hav1, Cd300c2, Nlrp1b, Nlrp1b, Src, Ly9, Il1rap, Ctnnbl1, Cd244a, Sp110, Ticam1, Znfx1, Slamf1, Exo1, Pglyrp1, Slc7a8, C1qb, Crtam, C6, Tlr2, Unc93b1, Jaml, Usp14, Trim56, Nmi, Samhd1, Cfp, Cd86, Trim14, Lag3, Lgals3, Tbkbp1, Ighv3-6, Il2ra, H2-K1, Gsdmd, Lamp3, Dhx9, Tl…
4	DNA replication	5.33196	Rfc3, Prim1, Dtd1, Mcm3, Pclaf, Dbf4, Cinp, Fen1, Fhit, Polh, Samhd1, Poll, Pold3, Poli, Fam111a, Nfic, Rfc5, Prim2, Mcm4, Pold4, Mcm5, Rfc2, Recql5, Pola2, Pole2, Cdc45, Rfc1, Ticrr, Gins3, Tbrg1, Dna2, Pole, Gins2
5	Nucleotide-binding	3.762	Pgk2, Septin9, Urgcp, Ercc3, Myo7b, Ephb4, Adk, Ift27, Clpb, Dync1h1, Mapkapk2, Gnas, Pim1, Ttll5, Nlrp1b, Nlrp1b, Src, Mapk7, Hk2, Septin5, Acsm3, Atp8a1, Helq, Ascc3, Dgkh, Snrnp200, Clp1, Sephs1, Dgkg, Tie1, Uba1, Samhd1, Ciita, Smc1a, Cct7, Rngtt, Dck, Camk2b, Atp11a, Rfc5, Rab19, Naip1, Dhx9, Cdk6, Iqca1l, Ripk1, P2rx3, Kif5a, Rab5a, Myo15b, Fancm, Atp5f1b, Rad50, Arhgap35, Ephb2, Pdgfrb, Cs…
6	Pleckstrin homology-like domain	3.58729	Arhgap22, Myo15b, Tln1, Frmd4b, Apba3, Myo7b, Plekhb2, Grb14, Iqsec2, Vav2, Cdc42bpb, Plekhf2, Mtmr2, Ptpn14, Spred2, Tbc1d2b, Mtmr9, Tbc1d9b, Plekhg5, Rtkn2, Arhgap24, Sh3bp2, Triobp, Fgd1, Osbpl3, Sh2d5, Sbf2, Arhgap21, Gab2, Osbpl1a, Plcg2, Osbpl7, Irs2, Mapkap1, Prex1, Dgkh, Vav3, Plekho2, Myo7a, Nup50, Bcr, Sptbn2, Als2, Arhgef11, Epb41l3, Plek, Nbea, Skap2, Fam43a, Wdfy4, Elmo3, Fermt3, Car…
7	Src homology-3 domain	3.45822	Myo7a, Hck, Myo15b, Abi2, Myo1e, Dnmbp, Myo7b, Myo1f, Abi3, Dock2, Cd2ap, Otor, Vav2, Srgap2, Dock5, Skap2, Abl1, Shank3, Arhgap33, Asap2, Pals2, Sash1, Nebl, Mcf2l, Sorbs3, Rusc2, Neb, Ppp1r13l, Fgr, Dlg5, Nedd9, Src, Hcls1, Pacsin1, Sorbs2, Arhgap26, Cacnb2, Plcg2, Sh3d19, Vav3
8	Zinc finger, FYVE/PHD-type	2.88021	Zfyve9, Sytl4, Rufy4, Kat6a, Fyco1, Sp140, Sp100, Phf8, Ankfy1, Wdfy3, Jade2, Mlph, Trim24, Plekhf1, Zfyve26, Plekhf2, Phf13, Zmynd8, Dpf2, Rufy3, Zfyve28, Mtmr4, Nsd2
9	GTPase activator activity	2.74128	Arfgap3, Rgs2, Arhgap22, Rap1gap2, Bcr, Arhgap35, Als2, Arhgap11a, Dock2, Racgap1, Sipa1l1, Srgap2, Dock5, Arhgap18, Tbcd, Rapgef2, Tbc1d2b, Arhgap33, Asap2, Arhgap17, Rab3gap2, Tbc1d9b, Arhgap24, Plcb1, Rgs18, Rasgrp3, Rgs1, Arhgap31, Sh3bp1, Rin3, Tbc1d5, Sec23b, Cdc42ep2, Arhgap21, Sgsm2, Nf1, Arhgap26, Prex1, Abr
10	structural constituent of cytoskeleton	2.73559	Tln1, Tubb2a, Lmnb1, Cylc1, Sptbn2, Epb41l3, Tuba1b, Tubb6, Tubg2, Vim, Tubb1, Tubb2b, Tubb5, Lmnb2, Actn4, Tube1, Tuba1c, Synm
11	Membrane	2.71886	Svopl, Coro1c, Mtmr2, Terb1, Adgrg3, Hpse, P2ry13, Snx10, Gp1ba, Reep1, Pdzd11, Ptgs1, Rmdn2, Tmem51, Fcgr3, Pex14, Copa, Rpn2, Soat2, Ncstn, Src, Osbpl3, Slc2a5, 1700020A23Rik, Tmem229b, Arhgap21, Pla2g15, Ncs1, Atp8a1, Prf1, Prex1, Tmem267, Scube1, Chst12, Slc7a8, Ramp2, Bace2, Agrn, Slc4a2, Stx1b, Trim14, Cldn2, Asap2, Ace2, Pla2g4e, Il2ra, Nlgn2, Lima1, Irag1, Cyp4b1, Scd2, Dpp4, Elovl3, Igsf…
12	chromosome	2.64007	Zwilch, Nono, Ckap5, Rad50, Pmf1, Rbm19, Rbbp8, Bub1, Utp4, Suv39h2, Mad2l1, Mms22l, Hjurp, Terb1, Suv39h1, Shld2, Nup37, Uvrag, Rif1, Timeless, Primpol, Chek1, Polr2a, Fam111a, Smchd1, Xrcc6, Ska2, Mycl, Rad51, Zeb2, Smc1b, Fkbp6, Mcm4, Il33, Sgo2a, Knl1, Sycp3, Dyrk1b, Pkhd1, Phf6, Cenpu, Helq, Gins3, Gins2, Topbp1, Pak1, Cgas, Ercc6l, Mcm3, Nsmce2, Cenpc1, Tinf2, Dsn1, Nek2, Tmpo, H2ac12, Gata…
13	microtubule	2.62891	Dcdc2a, Wdr44, Slc8a3, Septin9, Map1a, Tubb2a, Ttll11, Clip2, Tubgcp2, Dpysl2, Dnah1, Dpp9, Map2, Rmdn2, Tuba1c, Gas2l3, Slc8a2, Slc8a1, Pcnt, Dync1h1, Kcnab2, Ska2, Eml2, Ttll5, Mta1, Tuba1b, Tubb6, Lrrc49, Dnah11, Kif20a, Map4, Ttl, Kif3b, Dnah5, Kif18a, Nek2, Gas2l2, Tubb1, Tubb2b, Tubb5, BC024139, Cct7, Tube1, Kif23, Mt3, Map6d1, Mapre2, Kif20b, Kif12, Clasp1, Casp1, Kif24, Tubg2, Shtn1, Tekt…
14	Cell cycle	2.57936	Septin9, Urgcp, Ambra1, Pmf1, Bub1, Bin3, Poc5, Cinp, Phf13, Mtbp, Hjurp, Plk4, Pdcd2l, Suv39h1, Timeless, E2f3, Pard3b, Atm, Dync1h1, Cntrl, Triobp, Pim1, Rbl1, Src, Mapk7, Sgo2a, Sycp3, Septin5, Fanci, Ncapd3, Tbrg1, Usp39, Cenpc1, Cks1b, Zfp385a, Dbf4, Dsn1, Tfdp1, Ncapg, Smc1a, Ddias, Ccnd1, Ruvbl1, Kif23, Cks1brt, Nedd9, Cdk6, Epb41l2, Map9, Zwilch, Rgs2, Ckap5, Mitd1, Rad50, Rbbp8, Racgap1,…
15	chemotaxis	2.5131	Ackr4, Ccn1, Fpr2, Ccr5, Xcr1, Ccr2, Cxcl9, Ccr6, Dock2, Pdgfrb, Ackr2, Ackr3, Ccrl2, Plgrkt, Msmp, Ccr8, Ccl7, Cx3cr1, Cx3cl1, Robo2, Cmtm2b, Cysltr1
16	GTP binding	2.39035	Ehd4, Septin9, Urgcp, Tubb2a, Arhgap35, Gbp3, Srp54a, Ift27, Gbp2, Rhobtb1, Tuba1c, Eefsec, Eif2b1, Rab43, Arl4d, Rab15, Gnas, Gucy1a2, Gucy2c, Rnd2, Gucy2e, Tuba1b, Tubb6, Arl13b, Rab37, Septin5, 9930111J21Rik2, Drg2, Rhog, Tsr1, Cgas, Gnaz, Ift22, H1f4, Nmur2, Ciita, Samhd1, Arl11, Tubb1, Tubb2b, Tubb5, Efl1, Eftud2, Tube1, Rab8b, Rab31, Rngtt, Rab19, Ola1, Tubg2, Rab27b, Arl5a, Lrrk1, Zng1, Ls…
17	AAA+ ATPase domain	2.37186	Vwa8, Rfc3, Mcm3, Atad2, Nav3, Atp5f1b, Dnah5, Abca9, Srp54a, Clpb, Ntpcr, Abcd1, Helz2, Ruvbl1, Dync1h1, Vcp, Rfc5, Abcg1, Abcc1, Rad51, Rfc2, Psmc2, Trip13, Dnah11, Afg3l1, Rfc1, Ascc3, Rad51d
18	actin binding	2.33561	Abitram, Scnn1a, Myo15b, Slc6a2, Hip1, Tln1, Map1a, Flnb, Myo7b, Myo1f, Coro1c, Capzb, Ssh1, Lcp1, Nos2, Dag1, Gbp2, Map2, Nebl, Gas2l3, Ceacam1, Triobp, Coro2a, Cap1, Arpc1a, Itprid2, Hcls1, Pfn2, Parvg, Actn4, Myo7a, Myo1e, P4hb, Kif18a, Epb41l3, Ace, Mlph, Shank3, Flii, Myo19, Tlnrd1, Inf2, Ccr5, Ceacam2, Lima1, Lrrc10, Aif1, Myh7, Coro1b, Fmnl2, Gcsam, Itgb1, Epb41l2, Ablim3, Dbn1, Ywhah, Nca…
19	macrophage cytokine production	2.20684	Il1b, Mapkapk2, Axl, Ticam1, Myd88, Ifng, Nod1, Tlr2, Sucnr1, Casp4, Casp1, Twist1
20	WD40/YVTN repeat-like-containing domain	2.12416	Wdr44, Plxnb2, Fbxw17, Ambra1, Snrnp40, Thoc3, Utp4, Coro1c, Sema6b, Sema7a, Wdr19, Nup37, Arhgef10, Herc1, Spag16, Sec13, Fbxw2, Coro2a, Eml2, Copa, Plaa, Arpc1a, Dmxl2, Nbas, Fstl5, Rfwd3, Eif3b, Plxna1, Sema4d, Ift140, Plrg1, Wdr33, Nbea, Wdr7, Wdr53, Wdfy4, Wdr81, Gemin5, Sec31b, Plxnc1, Lyst, Fbxw8, Sema3f, Plxnb1, Pik3r4, Wdr25, Met, Poc1a, Wdfy3, Gnb4, Sort1, Coro1b, Wdr62, Fbxw5, Apaf1, W…
21	cilium assembly	2.03008	Dcdc2a, 2700049A03Rik, Ift46, Ift70b, Ehd4, Kif3b, Dnmbp, Cilk1, Dnah5, Tmem67, Ift22, Tmem138, Ttc39c, Tmem216, Ttc8, Intu, Ift140, Atp6v1d, Zfp423, Plk4, Tekt3, Wdr19, Rsph4a, Snx10, Ift27, Fbxw8, Yif1b, Ift57, Spag16, Cep70, Pcnt, Ccdc28b, Dtnbp1, Rpgrip1l, B9d1, Poc1a, Alms1, Kif24, Pkhd1, Arl13b, C2cd3, Tekt1, Iqcb1, Prickle1, Ablim3
22	beta-amyloid metabolic process	1.94515	Bace2, Mme, Psen1, Ncstn, Ace, Ide
23	endoplasmic reticulum	1.93931	Ambra1, H6pd, Rnf149, Poglut1, P2ry13, Snx10, Reep1, Casp4, Ptgs1, Pign, Slc9a1, Pdzd2, Hsd17b7, Rpn2, Por, Pdia6, Soat2, Ncstn, Prap1, Osbpl3, Nbas, Atp8a1, Tor1aip2, Tmem131l, Fig4, Hsd17b12, Bace2, Ext2, Unc93b1, Atf6, Kcna2, Gba1, Dhrs1, Usp25, Syvn1, Keap1, Atp11a, Pom121, Dtnbp1, H2-Q4, H2-K1, Rcn1, Scd2, Cyp4b1, Thbs1, Lrp5, Extl1, Tpd52, Serpina1a, H2-T23, Dpp4, Elovl3, Cln6, Dpagt1, Slc8…
24	hydrolase activity, acting on ester bonds	1.93046	Lyplal1, Lipn, Lipa, Exo1, Fan1, Fen1
25	multicellular organism development	1.92924	Spata18, Fam3c, Arhgap22, Ambra1, Lrp4, Dach2, Cilk1, Zfp521, Wnt10a, Csrp2, Ephb4, Tpi1, Spry4, Sema7a, Bmp4, Poglut1, Bmp8a, Timeless, Arx, Cited2, Eomes, Twist1, Fgf6, Ebf4, Plaa, Frzb, Piwil1, Olfm1, Psme4, Ccbe1, Casz1, Cdh17, Vdr, Arl13b, Mea1, Zfp41, Flrt3, Sim1, Eda2r, Rbpms2, Ereg, Agrn, Cdh22, Senp1, Rnf114, Ptcd2, Tie1, Catsper3, Nosip, Adcyap1r1, Zfp423, Nxn, Bhlha9, Syvn1, Lmx1b, Efn…
26	blood coagulation	1.92788	Mmrn1, Serpina10, C3, Dtnbp1, Fga, Hps4, F13b, Serping1, Plg, F5, Ptprj, F2rl2, Ap3b1, Gm49339, Cpb2, Gp1ba, Lyst, Tfpi
27	Protein kinase, catalytic domain	1.8883	Hck, Prag1, Limk1, Tyro3, Cilk1, Rps6ka1, Taok3, Bub1, Ephb2, Ptk7, Ephb4, Pdgfrb, Cdc42bpb, Csf1r, Mapk6, Abl1, Ksr1, Plk4, Stk3, Nek4, Chek1, Mapkapk2, Pask, Pim1, Gucy2c, Gucy2e, Mapk7, Src, Dyrk1b, Acvr1, Lmtk2, Axl, Stk35, Rps6ka2, Sik3, Pak1, Stk39, Grk5, Tie1, Musk, Mapk9, Nek2, Nek6, Sik2, Wee2, Sbk3, Peak1, Wee1, Camk2b, Dyrk2, Pik3r4, Dclk2, Flt3, Kdr, Fgr, Met, Trp53rkb, Hipk2, Cdk6, L…
28	nuclear envelope	1.82662	Tyro3, Nav3, Nup50, Tor1aip1, Syne3, Plaat3, Nup42, Tmpo, Cybb, Vcf2, Terb1, Lmnb2, Nup37, Lrrc59, Chmp4b, Nup107, Nup188, Ptgs1, Parp11, Sec13, Mlip, Nup205, Pom121, Pla2g4a, Dync1h1, Lmnb1, Nup210, Nup58, Smpd4, Mta1, Wdfy3, Alox5, Ndc1, Nup93, Nemp1, Tor1aip2, Atp1b4
29	phosphatidylinositol-3-phosphate binding	1.82371	Rufy4, Hip1, Pla2g4a, Rubcnl, Snx13, Snx24, Plekhf1, Zfyve26, Sestd1, Dennd1a, Zfyve28, Pla2g4e, Lancl2
30	establishment of protein localization to organelle	1.82059	Tspan10, Cd68, Lamp5, Lamp3, Lamp2
31	BEACH domain	1.81193	Wdfy4, Wdr81, Lyst, Wdfy3, Nbea
32	VWFA	1.80827	Vwa8, Antxr1, Itga11, C2, Cpne8, Itgb2, Vwa5a, Svep1, Matn3, Cpne3, Itih3, Itgad, Coch, Ints14, Itgb1, Itgal, Itgam
33	negative regulation of endopeptidase activity	1.79545	Serpina3i, Serpina10, Gapdh, Serpina1c, Serpinb9, Serpinb2, Serpinf1, Serping1, Serpinb6a, Serpini1, Serpinb6b, Serpinb8, Serpina3c, Serpina1a, Serpina1d, Serpina3k, Serpinb9g
34	lysosomal transport	1.70557	Hgsnat, Vps53, Vps54, Grn, Lrp1, Als2, Psap, Atp13a2, Vps51
35	lipid catabolic process	1.70463	Plcd4, Plbd2, Pla2g4a, Plcb1, Pla2g2c, Pafah1b3, Lipn, Lipa, Plaat3, Naaa, Prdx6, Ppt1, Pcca, Pla2g7, Pnpla2, Neu4, Plcg2, Plin1, Lipc, Pla2g4e, Plbd1
36	DNA replication initiation	1.64158	Pola2, Cdc45, Prim1, Mcm3, Rny1, Prim2, Mcm4, Mcm5, Topbp1
37	pyroptosis	1.63928	Zeb2, Gsdmd, Nlrp1b, Nlrp1b, Casp1, Naip1, Dhx9, Nlrp1a, Naip5, Dpp9, Casp3, Trim21, Naip2, Naip6, Casp4
38	Ubl conjugation	1.60563	Dnmt1, Trim50, Ambra1, Snrnp40, Sap130, Csnk2b, Il3ra, Trim24, Hjurp, Gli3, Dpf2, Skp2, E130308A19Rik, Poli, Pcnt, Polr2a, Mapkapk2, Triobp, Slc9a1, Gnas, Srbd1, Pim1, Rpn2, Soat2, Nlrp1b, Nlrp1b, Casz1, Ubc, Src, Lrp8, Eif4enif1, Alkbh3, Ogdh, Cblb, Arhgap21, Zmiz1, Mafk, Cdc37, Ticam1, Fanci, Arel1, Usp39, Bhlhe41, Topbp1, Ptbp1, Snrnp200, Hnrnpul1, Nup50, Cenpc1, Trmt1l, Tlr2, Atf6, Dsn1, Gpr3…
39	Immunoglobulin-like fold	1.56932	Scn3b, Cep192, Ebi3, Ptk7, Ephb4, Trim46, Il3ra, H2-T15, H2-T15, Tapbp, Ceacam19, Tnn, Sema7a, Igkv4-70, Igkv4-68, Igkv4-69, B2m, Ptprh, Ebf4, Fcgr3, Nectin2, Cd300c2, Ly9, Iglv3, Il1rap, Csf3r, Cd244a, Arel1, Slamf1, Gm5893, Iglv1, Tmem131l, Trim45, Crtam, Plxna1, Ifnlr1, Jaml, Tie1, Cxadr, Cntn4, Cd86, Plxnc1, Sema3f, Robo2, Lag3, Siglece, Il13ra2, Ptcra, Hapln4, Ighv3-6, Ceacam2, Kdr, H2-Q4, H…
40	Nucleotide excision repair	1.56591	Pole2, Polr2a, Rfc3, Pold3, Ercc3, Rfc5, Rfc1, Pole, Pold4, Xpa, Rfc2, Rad23b
41	CD8-positive, alpha-beta T cell activation	1.56087	Wdfy4, H2-T23, H2-Q4, Clec4a1, H2-K1, H2-D1, Clec4a2, H2-Q1, H2-Q2, Clec4a3
42	Axon guidance	1.55975	Plxnb2, Limk1, Plxna1, Sema4d, Ephb2, Ephb4, Efna1, Myl12a, Srgap2, Dpysl2, Abl1, Ptpn11, Ssh1, Sema6b, Sema7a, Plxnc1, Efnb1, Sema3f, Robo2, Plxnb1, Camk2b, Met, Src, Plcg2, Itgb1, Ablim3, Pak1
43	SH3 domain binding	1.55657	Sirpa, Sh3bp2, Abi2, Dtx1, Abi3, Cd2ap, Abl1, Arhgap31, Sh3bp1, Shank3, Hcls1, Elmo3, Dennd1a, Cblb, Elmo2, Arhgap17, Uvrag, Adam12, Gja1, Plscr1
44	cysteine-type endopeptidase activity	1.52178	Ctsc, Usp5, Lgmn, Casp7, Atg4c, Usp47, Casp12, Casp1, Blmh, Usp25, Casp3, Ctsb, Casp4, Ctsz
45	5'-flap endonuclease activity	1.51761	Gen1, Zgrf1, Dna2, Exo1, Fan1, Fen1
46	peptidase activity	1.51142	Tmprss11g, Usp5, Lgmn, Casp7, Mindy3, Plg, Ctsa, Nln, Ermp1, Cpb2, Dpp9, Casp4, Immp2l, Adam12, St14, Capn5, Ctsd, Fam111a, C2, Desi1, Dhh, Pdia3, C1ra, Erap1, Ncstn, Tmprss11d, Nlrp1b, Nlrp1b, Xpnpep1, Prpf8, Psmb8, Mmp20, Plau, Casp3, Mmp10, Eif3f, Ctsc, Abhd5, Bace2, Senp1, Scpep1, Ace, Usp47, Cndp2, Adamts3, Usp14, Blmh, Acr, Usp25, Vcpip1, Capn2, Psen1, Ctsb, Ace2, Ctsz, Fgl2, Ide, Prcp, Rnp…
47	cell-matrix adhesion	1.50868	Col5a3, Sirpa, Zyx, Strc, Itga11, Fga, Itgb2, Vcam1, Itgad, Itga3, Fermt3, Tnn, Hpse, Nid2, Itgb1, Itga9, Itgal, Itgam, Tnxb
48	apoptotic cell clearance	1.50557	Nr1h3, Axl, Tyro3, Mertk, Ccr2, Lrp1, Tyrobp, Tgm2, Timd4
49	DNA replication initiation	1.48704	Pola2, Cdc45, Prim1, Mcm3, Rny1, Prim2, Mcm4, Mcm5, Topbp1
50	Death-like domain	1.47388	Nlrp1a, Card11, Myd88, Ripk1, Nod1, Apaf1, Casp4, Casp12, Dlg5, Nlrp1b, Nlrp1b, Casp1
51	helicase activity	1.4716	Fancm, Snrnp200, Brip1, Ercc6l, Mcm3, Ercc3, Rad54l, Aqr, Ddx19a, Mov10l1, Helz2, Ruvbl1, Ttf2, Rad54b, Ddx24, Xrcc6, Hells, Mcm4, Mcm5, Supv3l1, Dhx9, Recql5, Znfx1, Helq, Chd9, Zgrf1, Ascc3, Dna2, Ythdc2
52	Fibronectin, type III	1.44948	Robo4, Tyro3, Ptprq, Ptprf, Ifnlr1, Ebi3, Ephb2, Tie1, Ephb4, Trim46, Ptprj, Prlr, Cntn4, Tnn, Sdk2, Il31ra, Robo2, Il13ra2, Ptprh, Hcfc1, Mpl, Il9r, Fndc1, Il2rb, Csf3r, Axl, Mertk, Igsf9b, Flrt3, Tnxb, Atf7ip
53	C2 calcium-dependent membrane targeting	1.41379	Capn5, Sytl4, Plcd4, Pla2g4a, Plcb1, Cpne8, Bcr, Syt9, Rpgrip1l, Syt12, Baiap3, Syt11, Cpne3, C2cd3, Otof, Sytl2, Plcg2, Uvrag, Rab11fip5, Prf1, Pla2g4e, Wwp2, Abr
54	nuclease activity	1.36313	N4bp1, Xrn1, Fancm, Drosha, Pld3, Pld4, Mgme1, Rbbp8, Dnase1l3, Snd1, Piwil1, Tdp1, Dnase1l2, Fen1, Dclre1c, Eri2, Eme1, Zc3h12c, Gen1, Dna2, Exo1, Plscr1, Fan1
55	Proton acceptor	1.34616	Hck, Acat1, Usp5, H6pd, Cilk1, Taok3, Bub1, Ephb4, Amacr, Cdc42bpb, Abl1, Tpi1, Adk, Ermp1, Plk4, Ptgs1, Poli, Mapkapk2, Pask, Pim1, Hsd17b7, Src, Mapk7, Dyrk1b, Acvr1, Pnpla2, Pak1, Hsd17b12, Pgd, Usp47, Cndp2, Tie1, Ydjc, Dhrs1, Usp14, Aoc1, Usp25, Eri2, Wee2, Hpgd, Aldh1a2, Pla2g4e, Ace2, Sbk3, Dck, Camk2b, Rnpep, Gale, Kdr, Dhrs4, Met, Trp53rkb, Cdk6, Lrrk1, Acad8, Ripk1, Pank1, Tyro3, Rps6ka…
56	DNA-directed DNA polymerase activity	1.33119	Polh, Rev1, Poll, Pola2, Pold3, Primpol, Pole, Pold4, Poli
57	Proteasome	1.32635	Psme1, Psmd12, Psmb8, Psme2b, Adrm1, Psme4, Psmd1, Usp14, Psmc2, Rad23b
58	RUN	1.32632	Rufy4, Fyco1, Rusc2, Sgsm2, Rubcn, Rufy3
59	EGF-like domain	1.32601	Ereg, Agrn, C6, Lrp4, Itgb2, Lrp1, Svep1, Hspg2, Tie1, Matn3, Adgre1, Cubn, Tnn, Cntnap5b, Muc13, Scarf1, Notch4, Megf11, Ptgs1, Adam12, Nrxn3, Dll1, Mmrn1, Adam6a, Nagpa, Fbn1, C1ra, Ccbe1, Fbn2, Lrp8, Thbs1, Lrp5, Plau, Thbs4, Adgre4, Nid2, Itgb1, Prf1, Scube1, Tnxb
60	SEA domain	1.3246	Tmprss11g, Agrn, Muc13, Hspg2, Tmprss11d, Tmprss9, St14
61	FERM/acyl-CoA-binding protein, 3-helical bundle	1.29852	Myo7a, Myo15b, Fermt3, Ptpn14, Ptpn21, Tln1, Plekhh3, Eci2, Frmd4b, Myo7b, Epb41l2, Epb41l3
62	response to cytokine	1.29774	Serpina3i, Mapkapk2, Xcr1, Serpina1c, Stat3, Sp100, Ddost, Pggt1b, Cd274, Serpina3c, Serpina1a, Serpina1d, Aldh1a2, Serpina3k
63	cysteine-type peptidase activity	1.29731	Capn5, Ctsc, Usp5, Lgmn, Casp7, Senp1, Atg4c, Usp47, Casp12, Casp1, Mindy3, Usp14, Otub2, Blmh, Usp25, Vcpip1, Casp3, Capn2, Ctsb, Casp4, Ctsz, Eif3f
64	neural crest cell migration	1.29056	Nrp2, Acvr1, Sema6b, Sema7a, Zeb2, Efnb1, Sema4d, Sema3f, Coro1c, Alx1
65	Alzheimer disease	1.24781	Gapdh, Casp7, Slc25a5, Ambra1, Tubb2a, Atp5f1b, Csnk2b, Wnt10a, Sdhb, Cybb, Eif2s1, Nos2, Tuba1c, Atg13, Plcb1, Ncstn, Tuba1b, Tubb6, Psmc2, Grin2c, Atp5po, Casp3, Irs2, Il1b, Bace2, Ndufa9, Lrp1, Ndufa11, Atf6, Xbp1, Psmd1, Mapk9, Psmd12, Tubb1, Tubb2b, Tubb5, Grin2b, Capn2, Psen1, Ide, Slc39a6, Chrm1, Fzd4, Pik3r4, Mme, Bid, App, Wnt9a, Casp12, Fzd5, Lrp5, Adrm1, Apaf1, Kif5a
66	guanyl-nucleotide exchange factor activity	1.21209	Arfgef2, Dennd4a, Dnmbp, Rgl1, Bcr, Hps4, Als2, Arhgef11, Ccz1, Dock2, Iqsec2, Vav2, Dock5, Dennd1a, Rapgef2, Arhgef10, Rab3gap2, Plekhg5, Mcf2l, Plcd4, Dock8, Eif2b1, Gbf1, Rasgrp3, Fgd1, Rin3, Sbf2, Prex1, Abr, Vav3
67	endoplasmic reticulum lumen	1.20043	Cln6, Dnajb11, Erp44, H6pd, Flt3, P4hb, Pdia3, Gbf1, Erap1, Pdia6, Rcn1, Hsp90b1, Pdia4, Pdia5, Poglut1, Selenom
68	Metal-binding	1.19911	Usp5, Itgb2, Csnk2b, Rnf149, Tyr, Trim24, Zfp1003, Ptgs1, Nebl, Poli, Drosha, C2, Syt9, Gnas, Pim1, Sp140, Zc3hav1, Casz1, Dnase1l2, Lrp8, Zfp41, Pla2g15, Zmiz1, Acsm3, Ncs1, Actn4, Znfx1, Atp8a1, Zc2hc1c, Prf1, Exo1, Plagl2, Agrn, Sephs1, Mlph, Aoc1, Poll, Samhd1, Eri2, Atp8b4, Trim14, Lmx1b, Asap2, Ace2, Pla2g4e, Tbkbp1, Dcp2, Rnpep, Lima1, Gca, Rcn1, Adamdec1, Pggt1b, Zfp773, Scd2, Cyp4b1, Pad…
69	intraciliary transport	1.19822	Ift70b, Ift46, Kif3b, Cilk1, Ift27, Ift22, Ift57, Intu, Ift140
70	Fibrinogen, alpha/beta/gamma chain, C-terminal globular domain	1.18038	Tnn, Cntnap5b, Fga, Angpt1, Fcna, Tnxb, Fgl2
71	extracellular space	1.17954	Col5a3, Ebi3, Plg, Chia1, Hpse, Gp1ba, Lipc, B2m, Fgf6, C2, Ghrh, Copa, Pdia6, Il33, Lrp8, Serpinb8, Glipr1l1, Iglv3, Sftpa1, Pla2g15, Prf1, Cd59a, Iglv1, Hmgn2-ps, Scube1, Ereg, C1qb, Agrn, C6, Chadl, Gba1, Ace, Mmp28, Aoc1, Cxadr, Cfp, Tgfbi, Ccl7, Il3, Ace2, Tfpi, Lgals3, Hapln4, Rnpep, Ceacam2, H2-Q4, H2-K1, Serpinb6a, Il20, Tmprss4, Fbn2, Tcn2, Thbs1, Serpina3c, Serpina1a, H2-T23, Ceacam16, …
72	cytokine-mediated signaling pathway	1.17432	Il13ra2, Ereg, Il1b, Flt3, Stat3, Ifnlr1, Ccr2, Ebi3, Il3ra, Prlr, Edn2, Csf1r, Il9r, Lilra5, Il1rap, Il2rb, Csf3r, Gm49339, Jak3, Myd88, Il31ra, Cx3cl1, Il3, Pira12
73	Ion transport	1.16801	Scn3b, Slc8a3, Scnn1a, Kcnn2, Kcnj12, Cngb3, Atp5f1b, Kcnj10, Slco3a1, Slc40a1, Racgap1, Atp6v1d, Cybb, Atp6v0a2, Kcnmb2, Kcnh4, Slc20a2, Atp6v1a, Tmc5, Clcn7, Slc8a2, Slc8a1, Gpr89, Kcnj5, Panx2, Gabrr3, Slc9a1, Kcnab2, Kcnk5, Fxyd6, Otop3, Grin2c, Atp5po, Clic4, Slc9a5, Cacnb2, Slc5a1, Atp1b4, Lrrc8b, Glra2, Slc8b1, Slc9a2, Kcnc1, Kcnh7, Slc4a2, Gria4, Kcna2, Kcna3, Cacna1b, Clcnkb, Atp6v1g2, C…
74	Complement and coagulation cascades	1.15934	C1qb, C3, C6, Fga, Serpina1c, Itgb2, F13b, Plg, F2rl2, C4b, Cpb2, Serpina1d, Cd46, Itgam, Tfpi, C1qa, C2, C1ra, Serpinb2, Serping1, F5, Cr2, C4a, Plau, Serpina1a, Cd59a, C1qc
75	ER-Golgi transport	1.15662	Sec13, Copz2, Lman1, Arfgap3, Scfd1, Sec23b, Sec31b, Copa, Trappc2b, Trappc10, Sec31a
76	phosphatidylinositol dephosphorylation	1.15045	Mtmr2, Inpp5b, Mtmr9, Fig4, Mtmr4, Mtmr1
77	calcium ion transport	1.09171	Slc8a2, Slc8a1, Slc8a3, Camk2b, Ramp2, Ccr5, Cacna1b, Micu1, Catsper3, Vdr, Nmur2, Pkd1l3, Trpm2, Cav3, Grin2b, Psen1, Cacnb2, Tmem37, Slc8b1, Cysltr1
78	Leucine-rich repeat	1.08136	Zyg11a, Nxf7, Rxfp1, Tlr2, Chadl, Tlr8, Lrch1, Rsu1, Lrrc14b, Ciita, Lrg1, Carmil1, Flii, Pramel7, Lrrc59, Gp1ba, Skp2, Phlpp2, Tlr13, Nepn, Cntrl, Lrrc10, Nlrp1b, Nlrp1b, Fbxl4, Carmil3, Nlrp1a, Lrrc49, Tlr9, Lrrk1, Cd180, Lrrtm1, Lrrc24, Flrt3, Nod1, Lrrc8b
79	regulation of the force of heart contraction	1.07026	Slc8a1, Myl4, Myl3, Apln, Slc9a1, Ifng, Gaa, Myh7
80	carboxypeptidase activity	1.06962	Ctsa, Prcp, Cpb2, Lap3, Scpep1, Ace2, Ace, Cndp2, Ctsz
81	proline biosynthetic process	1.06546	Pycr1, Noxred1, Pycr3, Aldh18a1
82	Low-density lipoprotein (LDL) receptor class A repeat	1.05267	Lrp5, Rxfp1, C6, Lrp4, Lrp1, Hspg2, Tmprss4, Tmprss9, St14, Lrp8
83	integrin complex	1.05083	Itga3, Itgad, Itga11, Itgb2, Itgb1, Itga9, Itgal, Itgam
84	Collagen-like	1.04562	Sftpa1, C1qb, Msr1, Fcna, C1qtnf6, C1qc, Wdr33, C1qa
85	Armadillo-like helical	1.04155	Zyg11a, Ipo5, Ckap5, Vac14, Dnajc13, Cip2a, Cul9, Psmd1, Tbcd, Ncapg, Elmo3, Terb1, Anapc1, Heatr5b, Ctnnd1, Inf2, Pik3r4, Rttn, Kpna6, Plaa, Clasp1, Htt, Psme4, Wdfy3, Jup, Ap3b1, Ctnnbl1, Ints7, Fmnl2, Cand2, Ppp4r4, Elmo2, Kpna2, Trrap, Ncapd3, Ripor3, Rrp12, Xpo5
86	Bromo adjacent homology (BAH) domain	1.03331	Dnmt1, Mta3, Bahcc1, Mta1
87	BRCT domain	1.02774	Rev1, Poll, Rfc1, Dbf4, Paxip1, Slf1, Topbp1
88	nuclear localization sequence binding	1.02592	Ipo5, Nolc1, Pom121, Kpna2, Kpna2rt, Kpna2rt, Kpna6, Nup58
89	Potassium transport	1.01906	Kcnc1, Kcnj5, Kcnj15, Kcnj12, Kcnh7, Kcnj10, Kcnab2, Kcna2, Kcna3, Kcnk5, Kcnd1, Kcnk13, Kcnj6, Kcnh4, Kcnk2
90	Sushi/SCR/CCP	1.00857	Sez6l2, Cr2, Susd2, C6, Il2ra, Cd46, C2, Svep1, Susd1, F13b, C1ra

## Sheet: Cluster 8
DAVID functional clustering of genes in cluster 8 in splenic transcriptome of TMEV-infected mice
Cluster #	Pathway	Enrichment Score	Gene IDs
1	extracellular region	3.90171	Fgl1, Pdgfrl, Bglap, Acp3, Prcd, Dnaaf4, Fgf14, Wfdc1, Matn2, Wnt5a, Ngf, Folr1, Spink1, Adamts12, Tll1, Dkk3, Htra4, Oosp2, Adamts18, Wnt11, Ccl17, Acrbp, Il2, Lalba, Adamts4, Aspn, Erfe, Il17re, Sema3g, Sfn, Adgrv1, Dnah9, Prg2, Daw1, Nppa, Bche, Col19a1, Lipm, Col6a6, Ptgds, Prss33, Cnmd, Dmbt1, Scg5, Mcpt1, Fgfbp3, Lpl, Angptl1, Scube2, Dkk2, Lyzl4, Cripto, Alkal1, Sema3e, C1qtnf4, Serpina3b,…
2	Membrane	3.36776	Slc27a5, Acp3, Cntn2, Or13a27, Slc23a3, Ryr2, Folr1, Rhbdl2, Slitrk6, Armh4, Cyp2f2, Plekhb1, Bik, Slc39a5, Gabrq, Pik3ip1, Gpr150, Kcnip2, Ksr2, Rgs5, Cd300lb, Atp13a4, Sema4f, Slc35e4, Cd300c, Adgrv1, Rab33a, Clec2h, Msi1, Ntrk3, Lvrn, Scn8a, Ptgds, Atp1a4, Errfi1, Hmgcll1, Gm266, Cntnap3, Cyp17a1, Phlda3, Rem2, Mal2, Kcnj1, Pex11g, Sema4g, Clic3, Vipr2, Heph, Ptk6, Atp4b, Ephb1, Mpz, Sag, Klb,…
3	MORN 7	2.64458	Als2cl, Morn3, Jph3, Jph2
4	Transport	2.57716	Gabra4, Ddx25, Cacna1e, Slc27a5, Chrna6, Scn8a, Ptgds, Atp1a4, Dmbt1, Scg5, Ryr2, Atp6v1c2, Folr1, Asic2, Grin3a, Spire2, Trpa1, Slc39a5, Pllp, Nup62cl, Ryr3, Gabrq, Fabp1, Clcn1, Atp1a2, Scara5, Atp8b5, Kcnip2, Rab3b, Chrna9, Rab25, Kcnj1, Kcnab1, mt-Nd3, Clic3, Slc25a18, Rims2, Kcne3, Heph, Atp4b, Cnga4
5	multicellular organism development	2.41442	Six3, Nat8f1, Ddx25, Col19a1, Trnp1, Pitx2, Ntrk3, Catsperg2, Cnmd, Dmbt1, Wnt5a, Ryr2, Tmem100, Plekhb1, Tll1, Nanos2, Hoxb5, Scube2, Dkk3, Dkk2, Mab21l2, Csrp3, Wnt11, Jph2, Sema3e, Zglp1, Ifitm5, Gli1, Sema4f, Sema4g, Tnfrsf12a, Mdfi, Tbx18, Cited1, Hoxa7, Gnrh1, Adgrv1
6	PDZ	2.2759	Htra4, Frmpd1, S2bpcox16, Synpo2l, Pdzd7, Rims2, Pdzd9, Pdzd4, Pdlim3, Pdzrn3
7	Actin-binding	1.87064	Lmod2, Xirp1, Baiap2l1, Myh8, Csrp3, Actn2, Vil1, Fam107a, Myh13, Flnc, Synpo2l, Myo16, Spire2
8	Immunoglobulin-like fold	1.73414	Pdgfrl, Trim9, Cntn2, Cntn1, Mybpc1, Ntrk3, Trav10, Il7r, Trbv28, Ighv1-36, Trav11, Flnc, Sorcs1, Trav6d-5, Trav6d-4, Lrrn4, Ighv15-2, Trav21-dv12, Iglv2, Hepacam, Trav4-3, Trav4-2, Psg17, Trav8d-1, Trbv31, Ighv7-3, Sema3e, Trav4n-3, Cd300lb, Sema4g, H2-M2, Igkv12-89, Sema3g, Cd300c, Trav13d-1, Igkv4-86, Trav4d-3, Ephb1, Mpz, Trav7n-4, Tarm1, Tarm1, Trav9d-4
9	side of membrane	1.68946	Folr1, Cripto, Efna2, Cntn2, Cntn1, Nrn1, Ly6f, Ly6g6d, Rtn4rl2, Lypd6b
10	GTPase activator activity	1.666	Als2cl, Rgs9, Dock3, Rgs4, Rgs6, Wnt11, Rgs11, Asap3, Rgs5
11	positive regulation of cell migration	1.62174	Gli1, Sema4f, Sema4g, Cripto, Wnt11, Ntrk3, Vil1, Sema3g, Cxcr4, Sema3e, Fam107a, Gper1
12	carbohydrate binding	1.58287	Clec2h, Clec4g, Cd209e, Prg2, Cd209d, Cd209c, Klra9, Emcn, Cntn2, Cntn1, Il2, Fbxo2
13	transmembrane signaling receptor activity	1.54602	Clec2h, Gabrq, Cd300lb, Gabra4, Glp2r, Chrna6, Adgrf3, Vipr2, Cd300c, Adgrv1, Chrna9, Adgrd1
14	catalytic activity	1.5399	Gpt, Hmgcll1, Rsad1, Pbld2, Gad1, Neil2, Echdc2, Kyat1, Aloxe3, Ckm
15	transmembrane signaling receptor activity	1.32255	Clec2h, Gabrq, Cd300lb, Gabra4, Glp2r, Chrna6, Adgrf3, Vipr2, Cd300c, Adgrv1, Chrna9, Adgrd1
16	Lipoprotein	1.30203	Cntn2, Cntn1, Prcd, Ednrb, Ly6f, Wnt5a, Lypd6b, Lime1, Cnr1, Folr1, Phf24, Gng14, Muc1, Rep15, Hmgcll1, Gpm6a, Nrn1, Ly6g6d, Rtn4rl2, Efna2, Wnt11, Cripto, Rasd1, Kcnip2, Htr1b, Rab3b, Ifitm5, Rab25, Palm3, Rgs4, Cckar, Rab33a
17	voltage-gated ion channel activity	1.29677	Kcnab1, Cacna1e, Clcn1, Clic3, Scn8a, Kcne3, Kcnip2, Kcnj1
18	extracellular matrix	1.1227	Adamts18, Wnt11, Col19a1, Adamts12, Col6a6, Dmbt1, Adamts4, Mfap5, Aspn, Rtn4rl2, Matn2, Wnt5a
19	Magnesium	1.11822	Ttll13, Atp13a4, Ttll10, Acvr2b, Atp1a2, Carns1, Tuba3a, Grin3a, Atp8b5, Tuba3b, Atp1a4
20	transmembrane transport	1.07922	Ryr2, Ryr3, Kcnab1, Cacna1e, Clcn1, Slc25a18, Scn8a, Trpa1, Slc2a9, Cnga4, Slc23a3, Slc39a5
21	CUB domain	1.0729	Scube2, Csmd2, Dmbt1, Tll1
22	Zinc finger, LIM-type	1.03543	Prickle4, Csrp3, Zfp185, Pdlim3, Scel

## Sheet: Cluster 9
DAVID functional clustering of genes in cluster 9 in splenic transcriptome of TMEV-infected mice
Cluster #	Pathway	Enrichment Score	Gene IDs
1	Ubl conjugation	34.9554	Map3k2, Sufu, Tti1, Cbx3, Meaf6, Zfp592, Des, Celf1, Blk, Apc, Ccnd2, Rabgef1, Rptor, Cdc23, Nkap, Odf2, Tiam1, Ldb1, Epn2, Rhoa, Polr2e, Lrwd1, Tcerg1, Hdac4, Cux1, Snx9, Elk4, Nfkb2, Rbm28, Rnf40, Sf3a1, Epc1, Etf1, Brd4, Ago3, Rsl1d1, Acin1, Ctnnb1, Tbl1xr1, Kdm5c, Pdpk1, Ikzf4, Trim2, Stk38, Lrrfip1, Notch2, Zbtb43, Ercc1, Sod2, Wwox, Tra2a, Lcorl, Arnt, Ddx6, Supt5, Lef1, Zbtb48, Stmn2, Raps…
2	nucleotide binding	17.273	Hars1, Trap1, Map3k2, Map3k12, Dhx36, Gfm1, Rhoq, Dgka, Cdk2, Rab6a, Vps4a, Blk, Lars1, Abca3, Septin10, Ube2j2, Rhoa, Rhobtb2, Ddr2, Srpk3, Actr1a, Pkn3, Map4k3, Pdpk1, Araf, Stk38, Uhmk1, Dgke, Rab22a, Cdk5, Dguok, Ddx6, Yme1l1, Mtpap, Rab23, Hspa9, Prkcq, Smarcad1, Map3k8, Twnk, Fastk, Abca5, Ehd3, Acss1, Tnik, Spast, Arl3, Rab35, Cdk8, Kif1c, Map3k3, Ddx42, Nek8, Smarca5, Mink1, Vps4b, Dhx32,…
3	RNA binding	17.2593	Hars1, Trap1, Thumpd3, Ahcyl1, Dhx36, Celf4, Eif4a2, Sf1, Helb, Mrpl21, Celf1, Tep1, Thumpd1, Nxf1, Srsf1, Fastkd1, Rbpms, Ddx55, Naf1, Rbm27, Cpeb1, Mbnl1, Lrrc47, Rbm28, Hnrnpk, Zcrb1, Sf3a1, Enox2, Zfp638, Khdc4, Zranb2, Dusp11, Api5, Tnrc6c, Paip1, Lrpprc, Ankhd1, Ago3, Prpf6, Rsl1d1, Exosc8, Taf15, Eif2d, Uhmk1, Thumpd2, Scaf4, Magoh, Rpp30, Fmr1, Tra2a, Rexo5, Nelfb, Rnmt, Caprin1, Bicc1, R…
4	Transport	16.6847	Iws1, Dhx36, Snx16, Bbs4, Vps16, Dnajc14, Rab6a, Cmah, Vps4a, Nxf1, Mcm3ap, Rabgef1, Stxbp3, Abca3, Slc3a1, Stxbp1, Stx16, Clcc1, Cux1, Slc38a1, Slc25a46, Snx9, Stard4, Relch, Tmem175, Cadps2, Tmc6, Acbd5, Lrpprc, Ap3s1, Slc17a9, Sfxn3, Yipf5, Gramd1a, Sec22b, Ap1b1, Magoh, Rab22a, Rbsn, Arcn1, Slc12a2, Atp6v1c1, Cog6, Slc37a3, Rab23, Cnnm3, Slc25a32, Vamp3, Vps50, Abca5, Steap2, Piezo1, Ehd3, Tm…
5	mRNA processing	10.5085	Iws1, Sfswap, Xab2, Cript, Prkaca, Cwc22, Zc3h13, Snrnp48, Celf4, Snw1, Luc7l3, Sf1, Yju2, Ppwd1, Celf1, Nudt21, Srsf1, Srsf7, Prpf38b, Rbm27, Hnrnpll, Ncbp1, Cpeb1, Sf3b1, Zcchc8, Tcerg1, Ppil3, Mbnl1, Rbm28, Cwc25, Hnrnpk, Rbm26, Zcrb1, Sf3a1, Rbbp6, Srsf6, Tsen15, Khdc4, Zranb2, Pan2, Prpf6, Acin1, Srsf9, Ddx41, Srsf5, Scaf4, Magoh, Prpf4b, Fmr1, Crnkl1, Tra2a, Rnmt, Khdrbs1, Pan3, Pdcd11, Mtp…
6	Mitochondrion	9.88288	Trap1, Mrps15, Dhx36, Tax1bp1, Gfm1, Glud1, Xpnpep3, Aifm3, Agtpbp1, Mrpl39, Spg7, Mrpl48, Mrpl21, Bcat2, Mtif3, Fastkd1, Mfn2, Dlst, Aldh4a1, Idh3b, Smad5, Slc25a46, Oxsm, Gfm2, Mrpl32, Mtif2, Etnppl, Oat, Agpat5, Stap1, Abcb7, Mcu, Casp8ap2, Pgrmc1, Pdk1, Lrpprc, Cisd2, Hmgcs2, Sfxn3, Oxct1, Pdss1, Nr4a1, Pdpk1, Nnt, Vdac2, Sh3bp5, Pmpcb, Rdh13, Rnf185, Sod2, Wwox, Polrmt, Rars2, Mrps25, Dguok,…
7	Metal-binding	8.185	Map3k2, Zfp511, Dhx36, Tax1bp1, Arih1, Mmp19, Tnfrsf11a, Impa1, Zfp592, Limd1, Lman2l, Glo1, Dgka, Cdk2, Yju2, Zfp747l1, Cmah, Rassf5, Rabgef1, Slc3a1, Rbm27, Zfp605, Cpeb1, Hdac4, Pde8a, Mbnl1, Car6, Zfp655, Masp2, Rnf40, Smpd3, Cadps2, Zfyve27, Lnx2, Cant1, Ppm1a, Ago3, Chn2, Pdss1, Nr4a1, Kdm5c, Ikzf4, Araf, Trim2, Stk38, Pla2g12a, Zbtb43, Dgke, Ilkap, Czib, Rbsn, Sod2, Rrm2b, Yme1l1, Sp4, Zbt…
8	ubiquitin-protein transferase activity	8.14138	Amfr, Birc3, Rnf19a, Rnf2, Rnf4, Obi1, Arih1, Mdm2, Herc4, Fbxl3, Traf3, Rnf6, Rbx1, Peli3, Map3k1, Rnf20, Trim23, Rnf135, Rnf141, Pex12, Herc2, Huwe1, Mib1, Traf6, Cul5, Zfp91, Xiap, Rnf130, Peli1, Lnx1, Trim11, Rnf40, Uhrf2, Rbbp6, Trim37, Tnfaip1, Chfr, Fbxl14, Lnx2, Pja2, Ubr1, Cul4b, Ube2d1, Fbxo4, Anapc11, Itch, Trim2, Ube3b, Ercc8, Trim28, Traf2, Brap, Ube2e1, Rnf144a, Ube2i, Klhl20, Ube2w…
9	cellular response to DNA damage stimulus	7.79638	Mlst8, Ercc5, Sirt1, Xab2, Cbx3, Taok1, Nbn, Ppp4r3b, Cdk2, Rbx1, Rad9a, Gnl1, Rad1, Uimc1, Smc5, Helb, Nfat5, Nae1, Blk, Apc, Gtf2h3, Rptor, Sfr1, Xpc, Wdr76, Nucks1, Xiap, Yy1, Tlk2, Lig3, Rbbp6, Atrx, Cetn2, Cbx1, Smg1, Sprtn, Usp1, Ash2l, Usp28, Brd4, Cfap410, Mutyh, Susd6, Zbtb4, Usp16, Ccnk, Rev3l, Cdk5, Fmr1, Ercc1, Bcl6, Kat5, Smc6, Brcc3, Phf1, Rrm2b, Parp1, Ssrp1, Ube2b, Atf2, Nuak1, Pw…
10	Ubl conjugation pathway	7.13621	Rchy1, Amfr, Atg4b, Pias3, Med8, Obi1, Klhl7, Arih1, Mdm2, Herc4, Fbxl3, Usp40, Traf3, Lztr1, Anapc2, Usp19, Rbx1, Rnf145, Ubr2, Trim23, Nae1, Ufsp2, Usp11, Rabgef1, Cdc23, Usp8, Cul5, Ube2j2, Dcaf8, Btbd1, Uchl3, Xiap, Stambpl1, Trim11, Fbxo32, Uhrf2, Rnf40, Klhdc2, Rbbp6, Trim37, Tnfaip1, Fbxl14, Magee1, Cacybp, Usp1, Usp28, Pja2, Rab40b, Ube4b, Fbxo4, Itch, Tbl1xr1, Trim2, Trim28, Klhdc10, Sen…
11	endoplasmic reticulum	7.02433	Magt1, Adamts9, Ahcyl1, Rdh5, Pou2f1, Cav2, Ormdl2, Dnajc14, Glud1, Lman2l, St6gal1, Aifm3, Hsd11b1, Dnajb12, Cmah, Dnajb9, Wls, Lars1, Thada, Ube2j2, Stx16, Clcc1, Cyp39a1, Stard4, Lypla1, Lmbr1l, Rtn4, Cert1, Ssr1, Tmed2, Dipk1a, Nsdhl, Zfyve27, Agpat5, Pgrmc1, Tmc6, Dhrs7, Cisd2, Creld2, Cant1, Yipf5, Samd8, Gramd1a, Sec22b, Nkiras1, Arsa, Vegfa, Rnf185, Tmcc1, Nat8, Slc10a7, Stx18, Zdhhc13, U…
12	nucleic acid binding	6.41544	Gpatch4, Dhx36, Nol8, Celf4, Eif4a2, Sf1, Celf1, Nxf1, Srsf1, Mcm3ap, Rbpms, Ets1, Ddx55, Srsf7, Rbm27, Hnrnpll, Cpeb1, Ddx18, Rbm10, Zcchc8, Rbm28, Hnrnpk, Rbm26, Zcrb1, Enox2, Akap1, Rbbp6, Srsf6, Tsen15, Zfp638, Dhx40, Recql, Pan2, Tnrc6c, Ago3, Acin1, Srsf9, Ctnnb1, Ddx41, Srsf5, Uhmk1, Scaf4, Rev3l, Fmr1, Tra2a, Rexo5, Pspc1, Tnfrsf22, Nars2, Khdrbs1, Bicc1, Rnpc3, Ddx6, Fubp1, Zgpat, Zfp346…
13	ATPase activity	6.10191	Trap1, Ddx23, Entpd7, Dhx36, Spast, Kif5c, Dqx1, Ddx59, Dhx16, Chd1, Eif4a2, Tor1b, Spg7, Smc5, Kif1c, Atp2a3, Pex1, Kif3c, Helb, Ddx31, Ddx42, Smarca5, Vps4a, Vps4b, Dhx32, Psmc5, Atp2b1, Ddx55, Kifc2, Abca3, Ddx51, Ddx18, Pex6, Hspd1, Cct5, Smc3, Afg2a, Ddx46, Rhobtb3, Katna1, Nvl, Ddx39b, Ddx3x, G3bp1, Pikfyve, Cct4, Atrx, Dhx40, Atp2a1, Clpx, Recql, Abcb7, Ddx39a, Chd1l, Mkks, Myo9b, Abcd3, H…
14	rhythmic process	5.96108	Gfpt1, Mettl3, Maged1, Kdm5a, Ddb1, Rock2, Sirt1, Sfpq, Cbx3, Fbxl3, Clock, Ppp1cc, Crebbp, Creb1, Huwe1, Prkdc, Srrd, Nfkb2, Csnk1e, Usp7, Enox2, Ncor1, Rora, Kat2b, Sik1, Usp9x, Sp1, Kdm5c, Nfya, Ncoa2, Tef, Hdac1, Nr1d2, Dnm1l, Cdk5, Mapk8, Pspc1, Id3, Ppargc1a, Mtor, Fbxw11, Relb, Kmt2a, Ube3a, Adcy1, Cry1, Gsk3b, Prkaa2, Ahr, Ddx5, Atg7, Hdac2
15	WD40/YVTN repeat-like-containing domain	5.2307	Plxna3, Sema4c, Mlst8, Dync1i2, Hps5, Ddb1, Pwp1, Tle3, Tecpr2, Plxna2, Atg16l1, Ift80, Wdr75, Wdr1, Pafah1b1, Ppwd1, Kctd3, Wdr59, Tep1, Nedd1, Taf1c, Vps11, Strap, Ahi1, Strn4, Zfp106, Sema6d, Rptor, Gnb1, Wdr76, Dcaf8, Lrwd1, Rmc1, Gnb5, Tle1, Wdr37, Wdr82, Wdr5, Stxbp5, Brwd1, Spag9, Eif2ak3, Wdfy2, Poc1b, Dmwd, Plxnd1, Pan2, Mapk8ip3, Wdr45b, Anapc4, Tbl1xr1, Ciao1, Dcaf13, Ercc8, Wipi2, Tle…
16	lysosome	5.17154	Rab27a, Lamtor2, Ctbs, Pip4p2, Asah1, Snx16, Vps16, Atg16l1, Cln5, Chid1, Gga3, Mfsd8, Trim23, Siae, Vps4a, Vps36, Bcl10, Abca3, Lars1, Rptor, Rmc1, Sppl2a, Nsg2, Npc1, Hexb, Tmem59, Rb1cc1, Spag9, Tmem175, Stx7, Got1, Vps33b, Tpp1, Slc46a3, Manba, Sgsh, Pax2, Cdip1, Wdr45b, Slc17a9, Gpr143, Slc15a4, Abca2, Arsa, Fuca1, Kptn, Acp2, Borcs8, Slc37a3, Dram2, Tmbim1, Galc, Vti1b, Clcn4, Tnfaip3, Snap…
17	Th17 cell differentiation	5.02032	Nfkb1, Ppp3ca, Smad2, Chuk, Il27ra, Cd247, Jak2, Il6st, Ifngr2, Ifngr1, Il4ra, Mapk8, Ppp3cb, Plcg1, Ikbkb, Stat5a, Gata3, Il1r1, Tyk2, Jak1, Mtor, Stat6, Cd3d, Nfatc2, Cd3e, Tgfbr1, Prkcq, Runx1, Il6ra, Ahr, Smad4, Nfkbie, Hif1a, Nfatc3, Rora, Stat5b
18	Bromodomain	4.88867	Ash1l, Brd7, Phip, Brd4, Brd8, Kmt2a, Brpf1, Trim28, Zmynd11, Baz2b, Brd1, Brd2, Crebbp, Smarca2, Brd3, Baz1b, Brwd1, Taf1, Kat2b
19	Transcription	4.19089	Taf6l, Rprd1b, Iws1, Zfp511, Dhx36, Pou2f1, Cbx3, Meaf6, Tada1, Zfp592, Limd1, Arid3b, Nkap, Polr2e, Tcerg1, Hdac4, Cux1, Elk4, Nfkb2, Nfatc3, Epc1, Lrpprc, Brd4, Ctnnb1, Nr4a1, Tbl1xr1, Kdm5c, Pdpk1, Ikzf4, Lrrfip1, Notch2, Zbtb43, Cbx8, Ctr9, Nelfb, Lcorl, Arnt, Mnt, Supt5, Lef1, Sp4, Zbtb48, Mtpap, Paf1, Rbm39, Chtop, Ajuba, Zeb1, Atf1, Pknox1, Med11, Tbx2, Meis2, Rnf2, Cdc73, Lbh, Bend5, Nfx1…
20	SH2 domain	4.18531	Crkl, Stap1, Chn2, Inpp5d, Matk, Lcp2, Tec, Tns3, Syk, Jak2, Grap, Plcg1, Yes1, Pik3r2, Sh2d2a, Blk, Fyn, Stat5a, Csk, Btk, Tyk2, Jak1, Stat6, Sla, Dapp1, Pik3r3, Abl2, Itk, Ptpn6, Fer, Sh2b1, Stat5b, Crk
21	DnaJ domain	3.97474	Dnajb9, Dnajb1, Dnaja1, Dnajc24, Dnajb6, Dnajc10, Dnajc1, Dnajc14, Dnaja3, Dnajc6, Dnajc4, Dnajc19, Dnajc3, Dnajc5, Dnajc5b, Dnajc9, Dnajb12, Dnajc7, Sec63, Dnaja2
22	AGC-kinase, C-terminal	3.97058	Prkacb, Rock1, Rps6ka5, Prkcz, Pkn2, Stk38l, Rock2, Pkn3, Prkaca, Stk38, Prkcq, Grk2, Sgk1, Prkch, Sgk3, Rps6ka3, Rps6kb1, Mast3, Sgk2, Akt3
23	RNA polymerase II transcriptional preinitiation complex assembly	3.78348	Taf6l, Dr1, Gtf2b, Med8, Taf3, Med1, Taf8, Med7, Taf5, Taf12, Med10, Med23, Gtf2a1, Taf11, Med31, Med4, Med25, Med11, Med17, Tbp, Taf1
24	mRNA transport	3.73959	Iws1, Lrpprc, Nutf2, Nup155, Ranbp2, Kif5c, Thoc1, Ncbp3, Magoh, Fmr1, Fyttd1, Nxf1, Srsf1, Mcm3ap, Ahctf1, Hnrnpa2b1, Srsf7, Xpo1, Khsrp, Ncbp1, G3bp2, Cpeb1, Tpr, Ncbp2, Hsf1, Zfp36l1, Senp2, Ddx39b, Nup214, Tnks, Nup85, Gle1, Cetn2, Myo1c
25	P-loop containing nucleoside triphosphate hydrolase	3.5573	Kras, Rab27a, Dtymk, Atp6v1b2, Srpra, Dhx36, Rala, Rhoq, Gfm1, Dqx1, Ak3, Dhx16, Chd1, Eif4a2, Gnl1, Tor1b, Spg7, Smc5, Trim23, Pex1, Dapk1, Helb, Rab6a, Myo1b, Tep1, Vps4a, Rhot1, Ddx55, Abca3, Septin2, Mfn2, Septin10, Rhoa, Ddx18, Pex6, Rhobtb2, Gfm2, Gtpbp4, Gna13, Drg1, Mtif2, Septin7, Atrx, Rab20, Iqgap1, Chst15, Bms1, Dhx40, Orc5, Recql, Abcb7, Rab40b, Fbxo4, Ddx41, Utp25, Abca2, Nkiras1, G…
26	Prostate cancer	3.49244	Kras, Nfkb1, Sos1, Pdgfra, Nras, Mdm2, Chuk, Ctnnb1, Pdpk1, Creb3, Braf, Araf, Tcf7l2, Egfr, Cdk2, Crebbp, Creb1, Pdgfa, Fgfr2, Pten, Pik3r2, Ikbkb, Pdgfd, Cdkn1b, Mtor, Lef1, Pik3ca, Igf1, Pik3r3, Zeb1, Raf1, Tcf7, Gsk3b, Fgfr1, Akt3
27	Serine-threonine/tyrosine-protein kinase catalytic domain	3.41399	Stk26, Map3k7, Map3k12, Ltk, Irak1, Pdgfra, Acvrl1, Matk, Braf, Araf, Egfr, Tnk1, Bmpr1a, Tec, Syk, Jak2, Fgfr2, Ptk2, Yes1, Blk, Fyn, Kit, Csk, Nek7, Btk, Ret, Tyk2, Jak1, Map3k20, Tnk2, Tesk1, Flt1, Ephb6, Ddr2, Abl2, Itk, Nrbp1, Limk2, Insr, Raf1, Fer, Fgfr1
28	cell cycle	3.25868	Nr4a3, Ccndbp1, Mdm2, Rala, Spin1, Nbn, Anapc2, Eif2ak4, Cdk2, Smc5, Pafah1b1, Lmln, Vps4a, Nae1, Nedd1, Ikzf1, Bora, Ppm1g, Ccnd2, Septin2, Cdc23, Usp8, Septin10, Rhoa, Stag2, Arhgef2, Tlk2, Arpp19, Snx9, Reep3, Lig3, Smarcb1, Uhrf2, Ccnh, Septin7, Smpd3, Rb1cc1, Cetn2, Dctn1, Casp8ap2, Zw10, Pkn2, Mapre1, Usp16, Ccnk, Ube2i, Zfp207, Cdk5, Ccng1, Mau2, Ccnt1, Cdkn1b, Brcc3, Ahctf1, Khdrbs1, Cul3…
29	Zinc finger, FYVE/PHD-type	3.24388	Ing5, Cxxc1, Ing3, Kdm5a, Kdm4b, Dnmt3b, Kdm5c, Trim28, Zmynd11, Baz2b, Brd1, Mllt10, Chd3, Rbsn, Rph3al, Ash1l, Phf1, Mtf2, Kmt2e, Ing4, Rufy2, Kdm4c, Kmt2a, Taf3, Ints12, Brpf1, Rufy1, Jade1, Nsd1, Kat6b, Uhrf2, Baz1b, Pikfyve, Zfyve16, Atrx, Zfyve27
30	Human cytomegalovirus infection	3.20282	Kras, Fadd, Pdgfra, Nras, Rock2, Mdm2, Chuk, Prkaca, Creb3, Rheb, Creb1, Ptger1, Map2k6, Ptk2, Il10rb, Pik3r2, Itpr1, Prkacb, Rock1, Il1r1, Jak1, Gnb1, Itgav, Rhoa, Pik3r3, Gnb5, Adcy6, Adcy3, Fas, Gna13, Gna12, Nfatc3, Crk, Crkl, Itpr2, Nfkb1, Elk1, Ppp3ca, Sos1, Sp1, Plcb3, Eif4ebp1, Ctnnb1, Tsc2, Egfr, Traf2, Vegfa, Casp8, Rac1, Itgb3, Ppp3cb, Adcy7, Ikbkb, Mtor, Atf2, Pik3ca, Nfatc2, Calm1, T…
31	Pleckstrin homology-like domain	3.18644	Pld1, Rock2, Acap1, Spata13, Fgd6, Appl2, Plekha8, Dock9, Ppp4r3b, Osbpl8, Rabgap1l, Tns3, Jak2, Clns1a, Nf2, Ptk2, Osbpl11, Plekho1, Pld2, Vps36, Plekha2, Arhgef7, Btk, Rock1, Ralgps2, Frs2, Dab2, Tiam1, Agap2, Arhgef2, Numb, Anks1, Tiam2, Grk2, Tbc1d9, Mtmr6, Cert1, Rasa1, Frmd8, Plcd3, Sh2b1, Cadps2, Rasa3, Stap1, Arhgef6, Sos1, Tbc1d1, Spred1, Ranbp2, Dock11, Trio, Apbb1ip, Pdpk1, Gramd1a, Ne…
32	Helical; Anchor for type IV membrane protein	3.08693	Golga5, Maoa, Stx1a, Slmap, Sec22b, Vti1a, Gosr1, Stx5a, Rhot1, Stx6, Vapa, Stx18, Bnip1, Ube2j1, Bet1l, Ube2j2, Stx16, Vamp4, Cux1, Stx12, Vti1b, Vamp3, Vamp2, Serp1, Vamp1, Stx7
33	RNA polymerase II transcriptional preinitiation complex assembly	3.00025	Taf6l, Dr1, Gtf2b, Med8, Taf3, Med1, Taf8, Med7, Taf5, Taf12, Med10, Med23, Gtf2a1, Taf11, Med31, Med4, Med25, Med11, Med17, Tbp, Taf1
34	RNA-processing protein, HAT helix	3.00014	Crnkl1, Cstf3, Tmtc1, Pdcd11, Xab2, Prpf6, Sart3, Nrde2
35	microtubule	2.99348	Invs, Dync1i2, Bin1, Tcp11l1, Spast, Rassf3, Kif5c, Tpgs2, Iqgap2, Atat1, Kif1c, Pafah1b1, Kif3c, Tpgs1, Ndel1, Stim1, Apc, Kifc2, Rassf5, Hook1, Odf2, Haus2, Mid2, Tiam1, Arhgef2, Cct5, Nin, Map1lc3a, Mdm1, Reep3, Ptpn20, Katna1, Nckap5l, Cct4, Dvl1, Iqgap1, Dctn1, Arhgap4, Lrpprc, Tbcb, Gabarapl1, Mapre1, Dynll2, Kif2a, Macf1, Tppp, Cct8, Ncoa2, Ndrg1, Tubgcp3, Zfp207, Dnm1, Dnm1l, Cdk5, Emd, A…
36	PWWP	2.92717	Glyr1, Msh6, Psip1, Dnmt3b, Brpf1, Zmynd11, Brd1, Dnmt3a, Pwwp3a, Hdgfl3, Nsd1
37	Src homology-3 domain	2.89999	Pstpip1, Cttn, Bin1, Matk, Nphp1, Spata13, Pals1, Tnk1, Pik3r2, Yes1, Blk, Ahi1, Arhgef7, Csk, Btk, Fchsd2, Tnk2, Abl2, Snx9, Rasa1, Stam, Arhgap4, Crk, Srgap3, Crkl, Cask, Arhgef6, Trio, Pex13, Macf1, Cacnb1, Itsn2, Fyb1, Tec, Ostf1, Dlg4, Noxo1, Grap, Plcg1, Fyn, Dst, Sla, Ppp1r13b, Itk, Dlg1, Asap1, Sorbs1, Dlg3, Pacsin2
38	Glycyl thioester intermediate	2.8036	Herc2, Ube2a, Ube2j1, Ube2b, Huwe1, Ube2d1, Birc6, Uba3, Ube2j2, Itch, Herc4, Atg3, Ube3a, Ube2k, Ube3b, Ube2m, Ube2g1, Ube2e1, Ube2i, Trip12, Ube2w, Smurf2, Ube2q2, Atg7
39	ATP-dependent chromatin remodeling	2.62303	Arid1a, Epc1, Actl6a, Ing3, Bcl7a, Vps72, Meaf6, Baz2b, Hdac1, Chd3, Smarca2, Kat5, Smarca5, Brd7, Actb, Bcl7b, Yeats4, Ep400, Brd8, Yy1, Mbd2, Mrgbp, Smarcc2, Uchl5, Smarcb1, 0610010K14Rik, Baz1b, Actr8, Morf4l2, Hdac2
40	nuclear pore	2.5935	Mcm3ap, Ahctf1, Rangap1, Kpna4, Nup155, Chmp2b, Ranbp2, Nup153, Kpnb1, Tpr, Xpo4, Ube2i, Senp2, Chmp5, Nup214, Tnks, Nup85, Vps4a, Vps4b, Nxf1, Gle1, Cetn2, Myo1c
41	kinetochore	2.56947	Zw10, Ppp1r12a, Actl6a, Meaf6, Zfp276, Rassf2, Sugt1, Ppp1cc, Zfp207, Dctn4, Pafah1b1, Kat5, Dctn6, Ndel1, Trappc12, Dctn5, Kansl1, Apc, Ahctf1, Brd7, Gtf2b, Actb, Rangap1, Septin2, Xpo1, Chmp2b, Fbxw11, Lrwd1, Cenpx, Dynll1, Csnk1a1, Cenpo, Tpr, Smarcc2, Hsf1, Smarcb1, Chmp5, Septin7, Nup85, Dctn1, Kat2b
42	DNA-binding, integrase-type	2.4677	Mbd6, Mecp2, Mbd1, Mbd2, Baz2b, Setdb1, Mbd4
43	Cul4A-RING E3 ubiquitin ligase complex	2.43346	Cdkn1b, Glmn, Crbn, Ddb2, Cul4b, Arih1, Ddb1, Ercc8, Det1, Rbx1
44	Endocrine resistance	2.43184	Kras, Jag1, Sos1, Sp1, Hbegf, Nras, Mdm2, Jag2, Prkaca, Med1, Braf, Araf, Egfr, Notch2, Ncoa3, Ptk2, Mapk8, Adcy7, Pik3r2, Cdkn1b, Prkacb, Mtor, Pik3ca, Igf1, Pik3r3, Adcy1, Raf1, Adcy6, Adcy3, Rps6kb1, Ncor1, Akt3
45	ETS	2.42718	Fli1, Etv3, Ets1, Elk1, Elk3, Ehf, Etv1, Spib, Gabpa, Elk4, Elf4, Ets2
46	Zinc finger, RING/FYVE/PHD-type	2.4019	Rchy1, Ing5, Amfr, Pias3, Ing3, Obi1, Arih1, Mdm2, Traf3, Zmynd11, Crebbp, Rbx1, Rnf145, Trim23, Rnf141, Ash1l, Mtf2, Xiap, Trim11, Uhrf2, Rnf40, Zfyve16, Rbbp6, Trim37, Atrx, Lnx2, Zfyve27, Pcgf6, Pja2, Ube4b, Kdm5c, Trim2, Trim28, Traf2, Usp16, Chd3, Rbsn, Rnf185, Rph3al, Unkl, Phf1, Rnf170, Kmt2e, Kdm4c, Hdac6, Rapsn, Rmnd5a, Nsd1, Kat6b, Baz1b, Birc3, Rnf2, Rnf19a, Rnf4, Trim35, Kdm5a, Fgd6, …
47	endoplasmic reticulum unfolded protein response	2.38586	Nfe2l2, Qrich1, Amfr, Herpud1, Tbl2, Herpud2, Creb3, Derl1, Eif2ak4, Erlec1, Parp6, Dnajc3, Derl2, Stc2, Parp8, Serp1, Ern1, Eif2ak3
48	mitophagy	2.3172	Fundc1, Capn10, Wdr45b, Snx30, Gabarapl1, Cisd2, Snx7, Ulk2, Atg3, Slc25a46, Wipi2, Map1lc3a, Rb1cc1, Ulk3, Atg7, Gabarapl2
49	phosphatidylinositol binding	2.29952	Itpr2, Snx19, Pik3c2a, Pld1, Esyt2, Snx30, Snx7, Snx16, Tulp3, Appl2, Pik3c2b, Gga3, Pxdc1, Tom1l2, Pitpna, Nisch, Hip1r, Noxo1, Sgk3, Pld2, Mtm1, Itpr1, Dab2, Esyt1, Snx6, Snx27, Snx9, Stam, Gga2
50	Zinc finger, CCCH-type	2.22743	Zc3h8, Zc3h7b, Zrsr2, Rbm27, Zgpat, Pan3, Cpsf4, Mbnl1, Zc3h13, Zc3h14, Unk, Mbnl2, Rbm22, Zfp36l1, Rbm26, Helz, Unkl, Zc3h18, Zc3h15
51	phosphatidylinositol dephosphorylation	2.19339	Inpp5e, Ocrl, Mtmr6, Pip4p2, Sacm1l, Synj2, Pten, Inpp5a, Inpp5d, Inpp5k, Mtm1, Synj1
52	positive regulation of transcription from RNA polymerase III promoter	2.1749	Ice2, Zc3h8, Rptor, Baz1b, Mtor, Sf3b1, Smarca5, Ddx21, Brf1, Myo1c
53	protein dephosphorylation	2.16249	Dusp11, Ppm1f, Ppp3ca, Ppp1r12a, Ptp4a1, Ppp2r5e, Ppm1a, Ptp4a2, Eya3, Ppp4r3b, Ppp1cc, Ilkap, Sdhaf2, Dusp6, Ppp2r5a, Ppp2ca, Ptpru, Pten, Ppp3cb, Dusp16, Mtm1, Ppp2r5c, Ppp2r1b, Ppm1g, Dusp19, Ppp2r2a, Ptpn12, Ptprc, Ppp6c, Fbxw11, Ptpra, Ppm1l, Ptpn9, Ppp2cb, Ptprb, Ptpn6, Ptpn22, Ptpn20, Ptpn2, Dusp3, Eya2
54	Protein kinase C-like, phorbol ester/diacylglycerol binding	2.14346	Rock1, Prkd3, Rassf5, Prkcz, Rasgrp1, Myo9b, Rock2, Chn2, Arhgef2, Braf, Araf, Prkcq, Dgka, Raf1, Dgke, Tns3, Prkch, Rasgrp4
55	Carbon metabolism	2.10796	Pdha1, Prps1, Idh2, Acss1, Acox3, Rpe, Idh1, Fh1, Glud1, Aco1, Sdha, Dld, Esd, Acat2, Aldh6a1, Me3, Dlat, Adh5, Dlst, Me2, Idh3b, Taldo1, Mmut, Acox1, Mdh2, Acss2, Pdhb, Gpt2, Got1
56	AAA+ ATPase domain	2.09493	Abcb7, Srpra, Spast, Abcd3, Orc4, Abca2, Psmc1, Afg3l2, Tor1b, Spg7, Pex1, Rad17, Abca1, Dmc1, Atad1, Vps4a, Vps4b, Psmc5, Abca3, Yme1l1, Pex6, Ighmbp2, Afg2a, Katna1, Nvl, Abca5, Clpx
57	glutamine metabolic process	2.09188	Asnsd1, Gfpt1, Ppat, Pfas, Ctps2, Mecp2, Gls, Slc38a1, Gmps, Glud1, Sirt4
58	Epstein-Barr virus infection	2.06658	Fcer2a, Fadd, Irak1, Mdm2, Psmd2, Chuk, Traf3, Cdk2, Snw1, Map2k6, Hes1, Ifnar1, Pik3r2, Psmc5, Btk, Ccnd2, Jak1, Traf6, Pik3r3, Nfkb2, Psmd14, Usp7, Fas, Cd40, Tab2, Map3k7, Nfkb1, Cd44, Gadd45g, Psmc1, Traf2, Casp8, Cd247, Hdac1, Rac1, Syk, Psmd6, Mapk8, Cd19, Ikbkb, Psmd11, Cdkn1b, Bcl2l11, Tyk2, Pik3ca, Cd3d, Relb, Cd3e, Tbk1, Tnfaip3, Nfkbie, Ddb2, Akt3, Hdac2
59	cell projection organization	2.05862	Ttc17, Actr3, Pcm1, Rpgr, E2f5, Cep41, Ehd3, Pkn2, Bbs4, Cfap410, Nphp1, Tsc2, Sdccag8, Boc, Cep83, Snap29, Ro60, Cby1, Cep97, Pdcl, Entr1, Rabep2, Bbs2, Ift122, Ahi1, Tmem231, Prickle3, Mark4, Cul3, Ocrl, Parva, Odf2l, Mtor, Asap1, Tsc1, Tctn3, Spag17, Cibar1, Rab8a, Tmem107, Cep20, Fbf1, Cep290, Tubd1, Flna, Nek1, Poc1b
60	peroxisome organization	2.02855	Pex10, Pex1, Pex16, Abcd3, Pex6, Pex5, Pex12, Sec16b
61	Tetratricopeptide-like helical	2.02475	Napg, Anapc5, Cstf3, Fkbp5, Xab2, Bbs4, Pex5, Ttc23l, St13, Trappc12, Tmtc1, Sart3, Vps11, Zc3h7b, Cdc23, P4ha2, Tcf25, Cops2, Ppid, Unc45a, Ttc17, P3h1, Lrpprc, Ttc14, Ranbp2, Prpf6, Naa16, Pcp2, Sugt1, Nrde2, Cdc27, Ctr9, Sel1l, Crnkl1, Polrmt, Psmd6, Dnajc7, Mau2, Psmd11, Mtor, Pdcd11, Rapsn, Ttc27, Klc1, Dnajc3, Gpsm1, Emc2, Tomm34, Appbp2, Sgf29, Fkbp4
62	positive regulation of B cell differentiation	2.02468	Stat5a, Syk, Mmp14, Inpp5d, Ppp2r3c, Stat5b, Cd27, Nckap1l
63	protein dephosphorylation	1.98938	Dusp11, Ppm1f, Ppp3ca, Ppp1r12a, Ptp4a1, Ppp2r5e, Ppm1a, Ptp4a2, Eya3, Ppp4r3b, Ppp1cc, Ilkap, Sdhaf2, Dusp6, Ppp2r5a, Ppp2ca, Ptpru, Pten, Ppp3cb, Dusp16, Mtm1, Ppp2r5c, Ppp2r1b, Ppm1g, Dusp19, Ppp2r2a, Ptpn12, Ptprc, Ppp6c, Fbxw11, Ptpra, Ppm1l, Ptpn9, Ppp2cb, Ptprb, Ptpn6, Ptpn22, Ptpn20, Ptpn2, Dusp3, Eya2
64	MIF4G	1.98468	Paip1, Nom1, Eif4g3, Ncbp1, Cwc22, Eif4g2
65	translation	1.96658	Hars1, Mrps15, Mrps5, Tars1, Gfm1, Nars1, Eif4a2, Qrsl1, Mrpl39, Hars2, Mrpl21, Aars2, Mtif3, Lars1, Dars1, Yars2, Mrpl27, Yars1, Gfm2, Mrpl32, Mtif2, Eif2ak3, Mrpl51, Sepsecs, Eif4g3, Etf1, Mcts1, Mrpl10, Eif2d, Wars2, Egfr, Rmnd1, Rars2, Nars2, Ears2, Eif4e2, Eif4e, Eif5, Mrpl52, Guf1, Eif3a, Ighmbp2, Eif4g2, Mrps18b, Larp4, Iars2, Mtrf1l, Eprs1, Mrpl36, Mrpl17, Hbs1l
66	Lipid biosynthesis	1.94826	Hsd17b11, Ugcg, Lpcat4, Hmgcs2, Crls1, Cyp51, Pisd, Agpat2, Chka, Prkag2, Prkab1, Lpgat1, Fads3, Elovl7, Pcyt2, Hpgds, Ptdss1, Far2, Cbr4, Cyp27a1, Cers2, Acbd3, Cers4, Mecr, Oxsm, Prkaa2, Serinc5, Far1, Chkb, Msmo1, Lpcat1, Nsdhl, Gpat4, Serinc1, Sc5d, Agpat5
67	histone H2A monoubiquitination	1.92653	Rnf2, Ddb2, Cul4b, Rnf168, Trim37, Ddb1
68	chaperone-mediated protein folding	1.89438	Pdcl3, Dnajb6, Fkbp5, Chordc1, Cct5, Cct8, Cct6a, Clu, Dnajc5, Ppid, Cct3, Cct4, Unc45a, Fkbp4
69	CD40L Signaling Pathway	1.88401	Nfkb1, Map3k1, Cd40, Cd40lg, Tnfaip3, Traf6, Chuk, Ikbkb, Traf3
70	Glycyl thioester intermediate	1.86965	Herc2, Ube2a, Ube2j1, Ube2b, Huwe1, Ube2d1, Birc6, Uba3, Ube2j2, Itch, Herc4, Atg3, Ube3a, Ube2k, Ube3b, Ube2m, Ube2g1, Ube2e1, Ube2i, Trip12, Ube2w, Smurf2, Ube2q2, Atg7
71	canonical Wnt signaling pathway	1.86624	Adgra2, Axin1, Apc, Reck, Dixdc1, Lef1, Sfrp2, Ctnnb1, Tcf7l2, Dvl3, Tcf7, Wnt1, Sdhaf2, Gsk3b, Dvl2, Fgfr2, Cby1, Pten, Dvl1, Vps4b, Stk4, Lrp6
72	peroxisome	1.81786	Hsdl2, Acsl4, Idh2, Acbd5, Acox3, Ephx2, Pex13, Abcd3, Idh1, Crot, Pex5, Rida, Dnm1l, Pex1, Hsd17b4, Atad1, Far2, Pex12, Pex10, Pex16, Hmgcl, Pex6, Akap11, Acox1, Far1, Trim37, Aldh3a2, Gnpat
73	aminoacyl-tRNA ligase activity	1.79664	Hars1, Ears2, Lars1, Dars1, Tars1, Yars2, Wars2, Nars1, Yars1, Iars2, Eprs1, Hars2, Aars2, Rars2, Nars2, Dalrd3
74	regulation of DNA repair	1.79509	Taf6l, Usp1, Brcc3, Tada2b, Actl6a, Tada1, Yy1, Supt20, Taf5, Taf12, Uchl5, Uimc1, Parg, Atxn7, Sgf29, Kat2b, Actr8
75	mRNA cap binding complex	1.76858	Rnmt, Fmr1, Eif4e, Eif4e2, Ncbp1, Cyfip1, Ncbp3, Ncbp2
76	PWI domain	1.76091	Rbm26, Prpf3, Srrm1, Rbm27, Rbm25
77	Raf-like Ras-binding	1.75165	Tiam2, Tiam1, Braf, Araf, Raf1
78	HEAT 2	1.70666	Ppp2r1b, Scyl3, Xpo1, Mtor, Eif4g3, Sf3b1, Nipbl, Ints4, Prkdc, Ap3d1, Kpnb1, Utp20, Sympk, Cand1, Relch, Heatr6, Tnpo1, Heatr3, Copb1, Copg1
79	Immunoglobulin E-set	1.69542	Plxna3, Plxnd1, Nfkb1, Arhgdib, Nfatc2, Relb, Trim2, Plxna2, Rel, Prkab1, Nfkb2, Vps26c, Camta1, Psmd5, Nfat5, Nfatc3, Gbe1, Sec63, Flna
80	LisH dimerisation motif	1.68252	Cep20, Smu1, Relch, Pafah1b1, Mkln1, Gid8, Tbl1x, Tbl1xr1, Rmnd5b, Ssbp2, Taf5, Rmnd5a
81	sphingolipid metabolic process	1.67436	Ugcg, Asah1, Kdsr, Serinc3, Gba2, Sgpp1, Samd8, Serinc2, Sptlc2, Gm2a, Fads3, Galc, Sptlc1, Zpbp2, Serinc5, Smpd3, Serinc1
82	MOZ/MORF histone acetyltransferase complex	1.67344	Ing5, Ing4, Kat6b, Meaf6, Brpf1, Brd1
83	Cyclin-like	1.66521	Ccnc, Ccnl2, Gtf2b, Ccnd2, Ccnj, Ccny, Ccnt2, Ccnk, Ccng1, Ccnh, Ccnl1, Rbl2, Brf1, Ccnt1
84	mTOR Signaling Pathway	1.6397	Eif4e, Mtor, Eif4g3, Pik3ca, Eif4ebp1, Eif3a, Pdpk1, Tsc1, Tsc2, Rheb, Eif4a2, Mknk1, Ppp2ca, Rps6kb1, Pten
85	TOR signaling	1.62943	Gata3, Eif4ebp2, Rptor, Hif1a, Mlst8, Rps6kb1, Mtor, Eif4ebp1, Mtm1
86	armadillo repeat domain binding	1.61612	Axin1, Strn4, Strn3, Lef1, Strn, Tcf7l2
87	cullin-RING ubiquitin ligase complex	1.60821	Glmn, Cand1, Cul3, Cul1, Cul4b, Cul5, Anapc11, Zswim8, Det1, Rbx1
88	ureteric bud development	1.60588	Ret, Pax2, Gdf11, Smad1, Smad7, Smad2, Dlg1, Smad5, Smad4, Fgfr2, Rarb, Sdc4, Fgfr1
89	Zinc finger, RanBP2-type	1.57986	Yaf2, Ranbp2, Rbm10, Tab2, Zranb1, Mdm2, Taf15, Nup153, Zranb2, Fus
90	histone acetyltransferase complex	1.56578	Ing5, Ing4, Kansl1l, Meaf6, Brpf1, Kansl2, Jade1, Crebbp, Wdr5, Msl3, Kansl1, Kat2b, Morf4l2
91	cysteine-type peptidase activity	1.56132	Usp1, Usp28, Atg4b, Usp9x, Usp33, Usp40, Capn7, Senp3, Casp6, Casp8, Ctsl, Usp19, Usp16, Zranb1, Ufsp2, Usp12, Usp11, Capn10, Cflar, Ctsk, Usp8, Uchl3, Casp2, Senp5, Atxn3, Usp24, Uchl5, Usp7, Tnfaip3, Senp2, Usp10
92	ceramide transport	1.56123	Vapa, Cert1, Cptp, Gltp, Plekha8, Osbp
93	histone modification	1.54095	Ctr9, Cdc73, Kat5, Paf1, Brpf1, Atxn3, Brd1, Crebbp
94	lysine-acetylated histone binding	1.51514	Brd7, Phip, Brd3, Yeats4, Brd4, Sirt1, Kmt2a, Taf1, Brd2
95	poly(A)-specific ribonuclease activity	1.51067	Pan2, Cnot8, Pan3, Cnot6, Parn, Cnot2, Cnot7
96	Ankyrin repeat	1.50644	Nfkb1, Clip3, Ppp1r12a, Invs, Ankhd1, Gls, Ankrd13d, Abtb3, Acap1, Notch2, Rai14, Ostf1, Camta1, Ankrd40, Ankrd60, Dapk1, Asb3, Asb7, Ankrd26, Mib2, Ankrd49, Ankrd52, Gabpb1, Mtpn, Ankzf1, Zdhhc13, Mib1, Kank2, Agap2, Ppp1r13b, Asap1, Nfkb2, Anks1, Anks3, Tnks2, Krit1, Nfkbie, Ppp1r12c, Tnks, Ankrd10, Psmd10, Trpv2
97	negative regulation of necroptotic process	1.505	Map3k7, Fadd, Birc3, Cflar, Mutyh, Peli1, Casp8
98	PDZ domain	1.50262	Cask, Sdcbp, Mpdz, Tamalin, Il16, Myo18a, Pals1, Scrib, Dlg4, Gopc, Dvl2, Mast3, Cnksr3, Lin7c, Pdlim5, Tiam1, Dlg1, Snx27, Dvl3, Limk2, Htra1, Cytip, Lnx1, Dlg3, Tiam2, Nherf1, Nherf2, Deptor, Dvl1, Erbin, Lnx2
99	SAP domain	1.48154	Mrtfb, Sltm, Pias3, Eri1, Acin1, Ccar1, Sf3b2, Pias2
100	nucleotidyltransferase activity	1.44333	Art2b, Trnt1, Polr2b, Parp1, Uap1, Polr3c, Polr1b, Mtpap, Papolg, Papola, Polm, Ugp2, Sirt4, Pcyt2, Parp6, Parp3, Rev3l, Tnks2, Parp8, Polrmt, Tnks, Nudt5, Thg1l
101	Lys63-specific deubiquitinase activity	1.42308	Psmd14, Brcc3, Tnfaip3, Usp9x, Stambp, Usp8, Stambpl1, Atxn3
102	mRNA cap binding complex	1.41381	Rnmt, Fmr1, Eif4e, Eif4e2, Ncbp1, Cyfip1, Ncbp3, Ncbp2
103	regulation of G1/S transition of mitotic cell cycle	1.40932	Cdkn1b, Brd7, Arid1a, Actb, Actl6a, Bcl7b, Bcl7a, Appl2, Ptpn6, Smarcc2, Smarcb1, Smarca2, Senp2, Ppp2ca, Ccnh
104	phosphatidylinositol metabolic process	1.40093	Inpp5e, Pip4k2a, Pip4k2c, Pikfyve, Plcb3, Pip5k1a, Plcg1, Pip4k2b, Synj1
105	Biosynthesis of amino acids	1.39795	Prps1, Idh2, Glul, Idh1, Rpe, Idh3b, Taldo1, Aco1, Mtr, Bcat2, Tha1, Gpt2, Got1
106	Citron-like	1.37995	Map4k4, Tnik, Map4k2, Mink1, Map4k3, Vps39
107	HnRNP-L/PTB/hephaestus splicing factor	1.37218	Ptbp3, Hnrnpl, Ptbp2, Hnrnpll
108	endocardial cushion formation	1.36245	Tbx2, Bmp5, Tbx3, Bmp2, Bmpr1a
109	Oxytocin signaling pathway	1.35108	Kras, Itpr2, Elk1, Mef2c, Ppp3ca, Ppp1r12a, Nras, Rock2, Plcb3, Prkaca, Egfr, Prkag2, Cacnb1, Prkab1, Ppp1cc, Cacng2, Pik3r5, Ppp3cb, Adcy7, Cd38, Itpr1, Prkacb, Rock1, Actb, Ryr1, Rhoa, Nfatc2, Calm1, Pik3cg, Adcy1, Raf1, Gnai3, Adcy6, Adcy3, Prkaa2, Ppp1r12c, Gnaq, Camk2a, Nfatc3
110	membrane coat	1.34244	Ap1b1, Dnm1, Chmp1b2, Ap4e1, Ap3s1, Ap3d1, Copb1, Copg1, Ap1s2, Synj1, Ap1g1
111	nucleotide-excision repair complex	1.33676	Ercc4, Ercc1, Xpc, Ercc5, Ercc8
112	v-SNARE coiled-coil homology	1.33589	Stxbp5, Vamp4, Vamp1, Sec22b, Vamp3, Vamp2
113	Natural killer cell mediated cytotoxicity	1.33536	Kras, Ppp3ca, Sos1, Nras, Lcp2, Braf, Araf, Cd247, Rac1, Syk, Ifngr2, Icam2, Ifnar1, Ifngr1, Ppp3cb, Plcg1, Pik3r2, Fyn, Tnfrsf10b, Pik3ca, Nfatc2, Pik3r3, Ptpn6, Raf1, Fas
114	EPS15 homology (EH)	1.33266	Eps15l1, Ehd3, Eps15, Itsn2, Reps1
115	phosphatidylserine metabolic process	1.3224	Serinc5, Serinc3, Serinc2, Serinc1
116	A-kinase anchoring protein 95 (AKAP95)	1.31672	Akap8l, Zfp326, Akap8
117	ARID/BRIGHT DNA-binding domain	1.29644	Arid3b, Arid3a, Arid1a, Kdm5a, Arid5b, Kdm5c
118	telomeric DNA binding	1.29084	Telo2, Terf1, Pot1b, Ten1, Terf2, Rpa2, Pot1a, Smg1, Hmbox1
119	nuclear envelope reassembly	1.27866	Ubxn2a, Chmp5, Ubxn2b, Spast, Chmp2b, Vps4a, Vps4b, Nsfl1c
120	ZZ-type	1.27629	Herc2, Tada2b, Mib1, Nbr1, Mib2, Utrn, Crebbp
121	histone methyltransferase activity (H3-K4 specific)	1.27217	Wdr82, Ash2l, Ash1l, Kmt2e, Setbp1, Cxxc1, Wdr5, Setd4, Kmt2a
122	nuclear inner membrane	1.27204	Ahctf1, Lrpprc, Smad1, Unc50, Nutf2, Nup155, Ranbp2, Cav2, Sirt1, Nup153, Tpr, Tra2b, Emd, Nup214, Ern1, Nup85, Gle1, Itpr1
123	THUMP	1.26005	Thumpd3, Thumpd1, Thumpd2
124	retinoid X receptor binding	1.25645	Uimc1, Rarb, Ncoa1, Med25, Ncor1, Ncoa2, Fus, Nsd1, Rarg
125	cochlea morphogenesis	1.25134	Tbx2, Rac1, Pax2, Dvl2, Dvl1, Dvl3, Zeb1
126	Phospholipid/glycerol acyltransferase	1.246	Lpcat4, Tmem68, Lpcat1, Gpat4, Gnpat, Agpat2, Tafazzin, Lpgat1, Agpat5
127	tissue development	1.24107	Postn, Twsg1, Ntn1, Lef1, Lama3, Lamc3, Atrn, Tcf7l2, Tcf7
128	Toll signaling pathway	1.23704	Peli3, Peli2, Irak1, Traf3, Peli1
129	RWD	1.23558	Rwdd1, Wdr59, Rwdd4a, Eif2ak4, Impact
130	G-protein coupled receptor binding	1.22864	Dnaja1, Cort, Tulp3, Dnajc14, Usp33, Akap5, Gnal, Gnai3, Grk2, Gna13, Gna12, Itgb4, Gnaq, Flna, Fyn
131	beta-catenin-TCF complex	1.21998	Ldb1, Lef1, Ctnnb1, Tle3, Tcf7l2, Tle1, Tle4, Tcf7
132	purine nucleotide biosynthetic process	1.20507	Prps1, Slc4a7, Ppat, Pfas, Adsl, Prpsap1, Gmps, Gart
133	Pyridoxal phosphate-dependent transferase, major region, subdomain 1	1.19072	Sepsecs, Csad, Pdxdc1, Kynu, Sptlc2, Sptlc1, Nfs1, Phykpl, Etnppl, Tha1, Oat, Gpt2, Got1
134	RA	1.18578	Rassf5, Rassf3, Apbb1ip, Myo9b, Rassf2, Rassf8
135	Death-like domain	1.18522	Qrich1, Nfkb1, Fadd, Birc3, Tnfrsf10b, Irak1, Cflar, Tnfrsf25, Thoc1, Casp2, Unc5b, Nfkb2, Casp8, Mefv, Fas, Dapk1, Bcl10, Pea15a, Dedd
136	Glutamine amidotransferase	1.18032	Asnsd1, Gfpt1, Ppat, Pfas, Ctps2, Gmps
137	Zinc finger, FYVE-related	1.17457	Fgd4, Zfp12, Rbsn, Rufy2, Pikfyve, Rph3al, Zfyve16, Wdfy2, Fgd6, Zfyve27, Rufy1
138	MIT	1.17099	Spast, Vps4a, Ulk3, Vps4b, Capn7
139	Ubiquitin interacting motif	1.17081	Uimc1, Eps15l1, Eps15, Stam, Epn2, Ankrd13d, Atxn3
140	negative regulation of myosin-light-chain-phosphatase activity	1.16834	Rock1, Rock2, Mprip, Ikbkb, Nckap1l
141	RNA polymerase II transcription factor activity, ligand-activated sequence-specific DNA binding	1.16203	Nr2f2, Ppard, Nr2c2, Nr4a3, Nr3c1, Nr4a1, Nr2c1, Rarg, Nr1d2, Ahr, Rarb, Nr3c2, Rora, Arnt
142	peptidyl-tyrosine autophosphorylation	1.15018	Dyrk1a, Btk, Ptk2, Ltk, Itk, Egfr, Insr, Tec
143	ENTH/VHS	1.14099	Tom1l2, Hip1r, Rprd1b, Stam, Rprd2, Tepsin, Epn2, Clint1, Gga2, Scaf4, Gga3
144	BTB/POZ fold	1.12961	Ivns1abp, Klhl7, Kbtbd4, Abtb3, Kbtbd3, Gzf1, Bach1, Zbtb17, Lztr1, Zbtb43, Kctd6, Rcbtb2, Zbtb11, Zbtb4, Klhl20, Bcl6, Kctd3, Klhl29, Bcl6b, Zbtb24, Zbtb20, Klhl28, Kctd13, Kctd5, Spopl, Gmcl1, Rhobtb2, Zbtb48, Btbd1, Btbd17, Kctd10, Zbtb49, Nacc2, Patz1, Rhobtb3, Klhl36, Btbd6, Kctd20, Klhl2, Tnfaip1
145	metabolic process	1.12663	Manba, Man2b1, Ctbs, Ephx2, Spast, Mutyh, Glb1l, Gba2, Gstz1, Pak2, Braf, Alkbh8, Gart, Man1a, Man1a2, Large1, Ppat, Parp1, Oga, Fuca1, Treh, Hyal4, Nt5c2, Mthfr, Gne, Pam, Cemip2, Me2, Galc, Hexb, Tnfaip3, Eprs1, Ern1, Hltf, Fuca2
146	melanosome assembly	1.11166	Ap1b1, Ap3m1, Ap3s1, Hps5, Ap3d1, Hps3, Ap1s2, Ap1g1
147	ENTH/VHS	1.11106	Tom1l2, Hip1r, Rprd1b, Stam, Rprd2, Tepsin, Epn2, Clint1, Gga2, Scaf4, Gga3
148	Flavoprotein	1.10506	Ndor1, Ivd, Acox3, Maoa, Dus1l, Acadl, Acad10, Aifm3, Sdha, Dld, Acadvl, Gpd2, Foxred2, L2hgdh, Sqor, Ldhd, Txnrd3, Dus4l, Acadsb, Dhodh, Steap4, Mthfr, Pcyox1l, Cry1, Rfk, Acox1, Steap2
149	K Homology domain	1.09775	Fxr1, Khdrbs1, Bicc1, Hnrnpk, Fmr1, Sf1, Khsrp, Ankhd1, Fubp1, Akap1, Fxr2
150	TNFR/NGFR cysteine-rich region	1.09243	Cd40, Fas, Tnfrsf4, Tnfrsf10b, Tnfrsf13b, Tnfrsf11a, Tnfrsf25, Tnfrsf22, Cd27
151	WW	1.08781	Wwc2, Pqbp1, Plekha5, Wac, Apbb2, Tcerg1, Itch, Sav1, Prpf40b, Wwox, Smurf2, Dgcr8, Utrn
152	histone deacetylation	1.08488	Hdac6, Hdac4, Tbl1x, Sirt1, Mier1, Tbl1xr1, Mbd2, Atxn3, Sirt4, Rbm14, Hdac1, Chd3, Brms1l, Msl3, Morf4l2, Hdac2
153	Ribonuclease H-like domain	1.08169	Snapc3, Pan2, Ago3, Zfp618, Gin1, Parn, Rev3l, Cnot8, Rexo5, Eri1, Tnfrsf22, Thap12, Cnot7
154	JAK-STAT cascade	1.07903	Stat5a, Ctr9, Jak2, Ager, Tyk2, Jak1, Ifnar1, Stat6, Agap2, Stat5b
155	phosphatidylinositol 3-kinase complex	1.07216	Pik3c2a, Pik3r5, Pik3ca, Pik3r3, Pik3r2, Pik3cg, Pik3c2b
156	autophagosome maturation	1.05583	Mfsd8, Snap29, Chmp5, Snapin, Chmp2b, Mcoln1, Vps4a, Vps4b, Vps16, Map1lc3a, Ubqln1
157	ER to Golgi transport vesicle	1.05578	Ergic3, Tmed10, Tmed4, Sec24b, Sec23a, Yipf5, Tmed2, Ergic2, Golga2, Tmed1, Yif1a, Lman2l
158	cytokine receptor activity	1.0553	Cd44, F3, Cntfr, Osmr, Il27ra, Cd74, Il6ra, Il6st, Il13ra1, Ifngr2, Ifnar1, Ifngr1, Il4ra, Il10rb
159	Carbohydrate metabolism	1.05104	Pdha1, Phkg1, Gsk3b, Chst1, Pdk1, Pgm2l1, Pdhb, Rpe, Dlat, Ppp1cc
160	neural precursor cell proliferation	1.05006	Btg2, Nfib, Rarb, Lims2, Nfix, Nfia, Lnx2, Lims1
161	HIV-I Nef: negative effector of Fas and TNF	1.03504	Nfkb1, Fadd, Arhgdib, Parp1, Cflar, Mdm2, Chuk, Prkdc, Pak2, Xiap, Casp2, Dffb, Traf2, Casp6, Casp8, Map3k1, Fas, Rasa1, Ptk2, Mapk8, Cdk11b
162	steroid metabolic process	1.02266	Hsd11b2, Cyp1b1, Erlin1, Rdh5, Hmgcs2, Insig2, Cyp51, Gba2, Lipe, Soat1, Akr1c13, Vldlr, Hsd11b1, Mbtps1, Slc37a4, Hsd17b10, Cyp27a1, Erlin2, Mttp, Npc1, Cyp39a1, Prkaa2, Msmo1, Nsdhl, Sc5d, Sult4a1
163	CCHC-type	1.00148	Zcchc4, Zcrb1, Srsf7, Sf1, Zcchc17, Zcchc8, Cpsf4, Rbbp6, Slu7, Ddx41

## Sheet: Cluster 10
DAVID functional clustering of genes in cluster 10 in splenic transcriptome of TMEV-infected mice
Cluster #	Pathway	Enrichment Score	Gene IDs
1	Membrane	74.1443	Or4k15, Or14c45, Fmo9, Cyp2g1, Or6c2b, Gpr182, Or1s2, Htr4, Htr6, Pcsk2, Mc4r, Pla2g2f, Srd5a2, Or5b98, Tmem275, Nucb1, Slc18b1, Tas2r137, Hs3st6, Entpd1, Arhgef12, Cdh7, Or10j3b, Or1j16, Gpsm2, Or10al4, Vmn1r228, Or14j10, Sva, Or6c3, Or14a258, Caly, Vmn1r211, Tas1r2, Or2aj6, Slc17a2, Tmem213, Or51af1, Il19, Csgalnact1, Or8b3b, Tmem247, Mc3r, Or7g32, Gpr101, Hsd3b1, Fgfbp1, Slc11a2, Or5p80, Or5d4…
2	Cytoplasmic	17.6889	Gprc6a, Gpr182, Htr4, Htr6, Mc4r, Abo, Slc18b1, Tas2r137, Hs3st6, Aadac, Entpd1, P2ry1, Cdh7, Slc24a3, V1ra8, Caly, Tas1r2, Tmem213, Csgalnact1, Neto1, Mc3r, Epha3, Gpr101, Grm5, Slc11a2, Or5p80, Tas2r129, Gfral, Tas2r120, Derl3, Trhr, Prlhr, Creb3l2, Erbb4, Slc6a5, Cacna1h, Vsig8, Or5p58, Tbxas1, Cldn14, Adam29, Tas2r139, Zp2, Gpr87, Vopp1, Taar9, Ptprs, Itga2, Slc2a2, Synpr, Grm1, Tas2r123, Tme…
3	Signal	14.648	Gm1330, Ifnl2, Defb20, Gprc6a, H2-M10.4, Cpn2, Col26a1, Ovch2, Npvf, Epo, Cd24a, Pcsk2, Prss56, Pla2g2f, Wfdc15a, Prss45, Pcolce, Svs4, Nucb1, Pth2, H2-M1, Inhbe, Prr27, Gzmd, Ces1g, Cdh7, Adcyap1, Slc24a3, Sva, Igsf21, Klk1b26, Tas1r2, Wnt8a, Tmem213, Agr3, Cpz, Il19, Neto1, Epha3, Eppin, Sval2, Grm5, Fgfbp1, Aoc1l2, Lyg2, Defb35, Gfral, Apcs, Prp2, Bmp15, Scgb1b2, Sbp, Ucma, Sbpl, Reg4, Spinkl,…
4	Taste transduction	12.5154	Tas2r130, Tas2r134, Grm1, Tas2r123, Tas2r129, Tas2r138, Adcy4, Tas2r120, Tas2r124, Tas2r110, Gabra6, Tas2r107, Tas2r137, Htr3a, Tas2r109, Tas2r104, Tas2r117, Tas2r106, Tas2r131, Gabra1, Tas2r103, Tas2r116, Tas2r125, Tas2r105, Gabra5, P2ry1, Tas2r114, Pde1a, Tas2r118, Htr1a, Tas2r119, Tas1r2, Tas2r139, Tas2r144, Htr3b, Tas1r3, Htr1f, Tas2r113, Tas2r102, Tas2r136
5	Keratin	12.3484	Krtap2-4, Krtap31-2, Krt5, Gm11567, Krt40, Krt6a, 2310057N15Rik, Gm9789, Gm9789, Krtap5-4, Krtap5-3, Krtap19-5, Krt73, Krtap9-3, Krt33a, Gm5414, Krtap1-5, Krtap5-2, Krtap24-1, Krt17, Krtap21-1, Gm11938, Krt6b, Krtap4-7, Krt9, Krt14, Krt34, Krt2, Krt87, Krtap3-1, Krtap4-16, Krt39, Krt84, Krt16, Krt28, Krtap7-1, Gm11937, Krt4, Krtap4-13, Gm11562, Krt35, Krtap13-1, Krtap6-2, Krtap4-2, Krt90, Gm5965,…
6	hormone activity	7.60175	Kng2, Prl7c1, Nppc, Prl2c5, Ucn3, Epo, Nppb, Rln1, Gast, Prl2a1, Gip, Prl2c1, Prl5a1, Prl3c1, Galp, Prl3a1, Inhbe, Prl8a2, Cck, Trh, Vgf, Uts2b, Agt, Avp, Prl4a1, Igf2, Cga, Urah, Fshb, Pth, Prl3d3, Crh, Adcyap1, Retnlb, Prl, Prl7a1, Prl8a6, Prl7a2, Crhr2, Prl8a8, Angptl8, Prl7b1, Inhbc, Prl7d1, Ucn, Prl8a9, Ppy, Prl8a1
7	defense response to bacterium	6.05364	Defb39, Defb20, Defb8, Gsdmc2, Wfdc12, Defb1, Defb10, Wfdc15b, Defa26, Pfpl, Defb36, Defb13, Pglyrp3, Wfdc15a, Lyzl6, Galp, Tab3, Defb6, Defb50, Defb38, Bpifa1, Gsdma2, Ifnb1, Defb14, Defb40, Defb5, Defb19, Eppin, Stab2, Ang4, Defb2, Lyg2, Spag11b, Defa24, Defb35, Defb11, Defb29, Defb7, Oas1f, Defb34, Defb3, Gsdmc3, Oas1d, Defb9, Fpr-rs3, Vgf, Fpr-rs4, Defb37, Defb45, Bpifa2, Gsdma3, Defb15, Defb…
8	regulation of transcription from RNA polymerase II promoter	5.83586	Dmrtc2, Zfp1000, Zfp1000, Arnt2, E2f1, Pdlim1, Epas1, Dmtf1l, Lmx1a, Zfp735, Evx1, Pou3f3, Kmt5a, Gcm1, Epo, Ecm1, Foxo3, Hoxb13, Prop1, Hand1, Foxl2, Mesp1, Rfx6, Sox7, Hnf4g, Foxd4, Bsx, Elf3, Pou4f3, Six2, Ascl1, Zfp367, Zfpm1, Zfy2, Msx3, Pax7, Esx1, Tlx3, Trp63, Mxd1, Pitx3, Tfap2d, Foxb2, Zfp786, Ankrd2, Smad6, Dlx2, Zfp354c, Gsc, Foxi2, Neurod4, Six6, Foxn1, Trak2, Hsfy2, Rb1, Brca1, Thrb,…
9	pheromone receptor activity	4.00321	Vmn1r8, Vmn1r234, Vmn1r71, Vmn1r51, Vmn1r226, Vmn1r63, Vmn1r52, Vmn1r12, Vmn1r214, Vmn1r82, Vmn1r225, Vmn1r237, Vmn1r26, Vmn1r178, Vmn1r179, Vmn1r230, Vmn1r45, Vmn1r78, Vmn1r35, Vmn1r231, Vmn1r233, Vmn1r74, Vmn1r222, Vmn1r73, Vmn1r68, Vmn1r47, Vmn1r53, Vmn1r177, Vmn1r236, Vmn1r219, Vmn1r46, Vmn1r213, Vmn1r228, Vmn1r75, Vmn1r48, Vmn1r67, V1ra8, Vmn1r211, Vmn1r193, Vmn1r54, Vmn1r171, Vmn1r66, Vmn1r…
10	Oxidoreductase	2.88322	Gpx2, Cbr2, Cyp3a25, Cyp2s1, Cyp2g1, Cyp2a5, Th, Cyp2c37, Nqo1, Ero1a, Cyp2b9, Cyp2c38, Dhrs2, Srd5a2, Alox12b, Akr1c20, Gcdh, Cyp2c29, Cyp2j13, Ctbp2, Cyp1a2, Mmachc, Cyp2a12, Gpx6, Hsd17b3, Cyp19a1, Dhrs7c, Alox12e, Tdo2, Rdh7, Tecrl, Cyp2c67, Tph2, Aox1, Nox3, Cyp3a59, Cyp3a59, Cyp2b23, Gapdhs, Rrm1, Fads1, Cyp3a16, Cyp7a1, Hsd3b1, Rdh19, Bdh2, Hao2, Phf8l, Kdm5d, Aoc1l2, Akr1c6, Asph, Hsd3b5,…
11	MAGE protein	2.66017	Magea6, Magea10, Mageb4, Mageh1, Magea9, Mageb5, Magea4, Magec2, Magea14, Magea13, Mageb5b
12	collagen trimer	1.89356	Col1a2, Emilin2, Cthrc1, Emilin1, Col4a5, Col5a2, Col14a1, Col3a1, C1ql3, Col6a2, Col26a1, Col15a1, C1qtnf7, Mbl2, Otol1, Col1a1, Colec10, Col5a1, Mbl1, Col4a2, Col4a1
13	cysteine-type endopeptidase inhibitor activity	1.88197	Kng2, Cst11, Cst5, Ltf, Serpinb3d, Cst13, Cst8, Birc5, Spock1, Cstdc2, Cst9, Cstdc1, Serpinb13, Cst12, Serpinb3a, Birc7
14	multicellular organism development	1.83216	Cdh5, H1f7, Spink5, Txndc8, Fgf3, Epas1, Mael, Lmx1a, Dppa4, Cdh3, Shh, Evx1, Pou3f3, Robo1, Spesp1, Gcm1, Hoxb13, Adam24, Adam26a, Ripply2, Foxn4, Dppa3, Spata20, Hoxd12, Hand1, Mesp1, Rfx6, Gsx2, Elf3, Cdh7, Six2, Ascl1, Sema5a, Msx3, Pax7, Enah, Uncx, Spry2, Tlx3, Trp63, Pitx3, Hoxc12, Slco4c1, Cdh12, Wif1, Wnt8a, Catsper1, Shroom2, Kctd15, Ccsap, Dlx2, Gsc, Ihh, Neurod4, Six6, Mdk, Foxn1, Dcc…
15	Kazal domain	1.7375	Cfi, Spink14, Slco6c1, Spock1, Spink5, Spink12, Spink6, Spink7, Slco6d1, Slco1a1, Spinkl, Slco4c1, Spink10, Sparc, Slco1a4
16	peptidase inhibitor activity	1.71872	Cst13, Spink5, Wfdc12, Serpina3a, Spink12, Serpinb13, Timp3, Serpine2, Wfdc15b, Wfdc15a, Smr2, Birc7, Timp2, A2m, Cst11, Tfpi2, Cst8, Serpina1f, Birc5, Cst9, Cstdc1, Spink6, Spink7, Cst12, Spint4, Pbp2, Spink10, Eppin, Serpinb12
17	MAM domain	1.66704	Ptprm, Alk, Mep1a, Tmprss15, Npnt, Mep1b, Mdga1
18	Immunoglobulin E-set	1.65988	Arrb1, A2m, Pip, Tgm3, Poglut2, Pde6d, Sva, Plxna4, Sval1, Kcnj4, Sval3, Kcnj8, Poglut3, Sval2
19	histone binding	1.59273	Scmh1, Cts8, Anp32e, Mllt3, Aplf, Ctsj, H2al2a, Brpf3, Cts7, Mcm2, Cts6, Phf10, Dek, BC051665, Ctsq, Samd7, H1f9, Ctsr
20	Transcription factor, fork head	1.57556	Foxd4, Foxn4, Foxb2, Foxe3, Foxa1, Foxi2, Foxh1, Foxf2, Foxl2, Foxn1, Foxo3
21	estrogen 16-alpha-hydroxylase activity	1.57365	Cyp2c29, Cyp3a25, Cyp1a2, Cyp3a59, Cyp3a59, Cyp2c50, Cyp2c38, Cyp2c39, Cyp3a44, Cyp3a16, Cyp2c37
22	Calycin	1.57212	Rbp2, Lcn8, Mup5, Fabp5, Pbsn, Crabp1, Mup4, Lcn12, Crabp2, Lcn5, Obp2a, Lcn3, A530053G22Rik, Fabp9, Lcn10, 5430402E10Rik, Lcn6, Fabp6, Pmp2
23	protein dimerization activity	1.56873	Sohlh1, Arnt2, E2f1, Epas1, Neurod4, Hes2, Btrc, Myf5, Myod1, Hand1, Mesp1, Heyl, Helt, Grm7, Bhlhe40, Mlxipl, Nhlh2, Mxi1, Ascl1, Ferd3l, Myog, Add1, Mxd1, Neurog3, Mycs, Hsp90ab1, Neurog1, Neurod6
24	Hydrolase	1.49291	Prss55, Cfi, Dclre1a, Cpn1, Shh, Ovch2, Pudp, Mcm2, Capn1, Hyal5, Adam24, Prss42, BC051665, Adam26a, Prss56, Pcsk2, Nt5c1b, Pla2g2f, Plaat1, Usp29, Tmprss12, Zranb3, Arsj, Usp43, Gdpd5, G6pc2, Mmp2, Ces2a, Wrn, Aadac, Usp50, Entpd1, Ctsj, Gzmd, Ces1g, Tmprss11f, Trex1, Casp14, Minpp1, Klk1b26, Prss58, Apobec2, Cpz, Plcd1, Ces1c, Usp17lc, Ppef2, Mcm8, Ppp1cb, Padi4, Ihh, Lyg2, Ampd3, Gzmg, Sppl2c,…
25	postsynaptic membrane	1.47971	Grm2, Grm5, Gabrd, Grm1, Adam10, Hcn1, Canx, Clcn3, Gabra6, Adra2a, Kctd16, Chrna5, Kctd8, Grm7, Htr3a, Gabrb2, Lrrtm4, Erbb4, Arrb1, Grip1, Gabra1, Chrnd, Gabra5, P2ry1, Grm3, Cacna1h, Snta1, Gpr158, Slitrk3, Glra1, Igsf21, Dlgap1, Kcnj4, Picalm, Gabrp, Gabrg2, Oprk1, Glra3, Htr3b, Neto1, Drd2
26	fatty acid binding	1.31468	Rbp2, Sh3glb1, Fabp9, Cd36, Fabp6, Pmp2, Fabp5, Crabp1, Cyp4a14, Crabp2
27	regulation of inflammatory response	1.31057	Nlrp9a, Agt, Nlrp9b, Nlrp4a, Duoxa2, Nlrp9c, Trex1, Nlrp4e, Nlrp5, Mcph1, Nlrp4b, Nlrp2, Nlrp4f, Nlrp14, Gzmn
28	varicosity	1.28933	Ucn, Crh, Crhbp, Pnmt, Ucn3, Crhr2
29	Cytosolic fatty-acid binding	1.25708	Rbp2, Fabp9, Fabp6, Pmp2, Fabp5, Crabp1, Crabp2
30	Olfactomedin-like	1.24652	Olfml2b, Olfm5, Myoc, Olfm3, Olfm4
31	sodium-independent organic anion transmembrane transporter activity	1.23565	Slco4c1, Slc22a28, Slc22a19, Slco6c1, Slc22a26, Slc22a6, Slco1a4, Slco6d1, Slco1a1
32	Laminin G domain	1.17238	Cntnap4, Col14a1, Col15a1, Thbs2, Shbg, Fat4, Col5a1, Pros1, Crb1, Cntnap5c, Nell1, Lama2, Crb2
33	cilium	1.11505	Odad2, Aurka, Tppp2, Crocc, Htr6, Ttll1, Arl6, Ptchd3, Lyzl6, Pkd2, Cfap221, Cetn1, Mchr1, Tekt4, P2ry1, Mroh2b, Pde1a, Pdc, Sstr3, Ift81, Cav1, Ptch1, Ropn1, Calcr, Sntn, Pcare, Rsph3b, Gapdhs, Catsper1, Akap4, Nphp3, Ccsap, Mns1, Atp2b4, Iqca1, Npy2r, Ttll8, Macir, Cimip1, Cabs1, Cfap58, Prlhr, Whrn, Umod, Ttll7, Bbs1, Efhc1, Hoatz, Slco6c1, Pramel1, Pfkm, Myoc, Dcdc2c, Pmfbp1, Ccp110, Fscb, Tt…
34	inflammatory response to antigenic stimulus	1.07577	Il5ra, Il25, Hmgb2, Il36a, Il36rn, Trex1, Il1f10, Il36b
35	Fibronectin type-III	1.04493	Il5ra, Ptprm, Fsd1l, Epha6, Lrit2, Crlf1, Robo1, Dcc, Myom1, Mdga1, Ankfn1, Sned1, Lrfn5, Igfn1, Rimbp2, Epha5, Tek, Fn1, Col14a1, Cntn6, Igf1r, Lrrn3, Il12rb2, Ephb3, Sdk1, Cntn5, Epha3, Ptprs
36	extracellular matrix structural constituent conferring tensile strength	1.02844	Col1a1, Col1a2, Col5a1, Col4a5, Col5a2, Col14a1, Col3a1, Col4a2, Col6a2, Col4a1, Col15a1, Otol1
37	Chemical carcinogenesis - receptor activation	1.0158	Ugt2b35, Cyp3a25, Ugt2b5, Ugt2b37, Ugt2b1, E2f1, Gstm1, Ugt2b38, Fgf3, Adcy4, Gstm3, Fgf5, Rb1, Cyp2b9, Fgf4, Fgf22, Cyp3a44, Creb3l2, Arrb1, Cyp1a2, Ugt2a2, Birc5, Hsp90ab1, Cyp2b23, Ugt2a3, Cyp3a16

[truncated: 5 more sheets: Cluster 11, Cluster 12, Cluster 13, Cluster 14, Cluster 15]
