# Supplementary material for: Exploring the Role of Platelets in Virus-Induced Inflammatory Demyelinating Disease and Myocarditis
Source: Int J Mol Sci. 2024 Mar 19;25(6):3460. doi: 10.3390/ijms25063460 (PMC10970283; doi:10.3390/ijms25063460)
Supplement: Supplementary file 1 [file ijms-25-03460-s001.zip › Supplemental Table S5.xlsx]

## Sheet: Table S5A
Table S5A. DAVID functional clustering of differential expressed genes (DEGs) (P < 0.05) in the platelets of TMEV-infected mice on day 4 post infection (p.i.)
Cluster	Pathway	Enrichment Score	Genes
1	Actin binding	2.10653	Cap1, Pdlim7, Mprip, Pfn1, Flna, Wasf2
2	Cytoskeleton	1.7273	Pkp4, Septin7, Jak1, Ubr4, Septin11, Pdlim7, Mprip, Pfn1, Spin1, Flna, Wasf2
3	Lysosome	1.53195	Lgmn, Acp3, Cdip1, Grn, Psap, Plaat3
4	Ubl conjugation	1.41514	H2bc3, Zfp664, Jak1, Yap1, Cap1, Rpl13, Pfn1, Spin1, Prrc2c, Rap2a, H2bc4, H2-D1, Flna, H2bc1, Sin3b
5	Cell junction	1.38161	Rap1a, Pkp4, Yap1, Erbin, Ptprj, Lims1
6	Cell projection	0.984165	Muc20, Septin7, Septin11, Flna, Wasf2, Ptprj
7	Mitochondrion	0.888344	Ucp2, Rfk, Hs1bp3, Smim20, Grn, Atp5if1, Psap, Ndufa1, Plaat3, Mpc2
8	Glutamatergic synapse	0.863609	Rap1a, Septin7, Septin11, Grn, Pfn1, Flna, Erbin
9	Metabolic process	0.606543	Man1a2, Pygb, Rfk, Man1a, Ndufa1, Plaat3
10	Golgi apparatus	0.549786	Gorasp2, Man1a2, Scamp2, Man1a, Ap4s1, Grn, Tg, H2-D1
11	Transport	0.471054	Sec62, Ucp2, Kcnj5, Scamp2, Ap4s1, Stxbp5, Ndufa1, Osbpl8, Mpc2
12	Glycoprotein	0.337243	Man1a2, Tmem158, H2bc3, Lgmn, Muc20, Acp3, Grn, Psap, Tm4sf1, Ptprj, H2bc4, Man1a,Tg, H2-D1, Tm2d2
13	Nucleotide binding	0.280607	Rap1a, Rfk, Rap2a, Septin7, Jak1, Ube2b, Septin11
14	Metal-binding	0.202941	Man1a2, Zfp664, Cdip1, Jak1, Pdlim7, Zfp655, Capns1, Rfk, Man1a, Ubr4, Trim10, Lims1
15	Membrane	0.134483	Gorasp2, Tmem158, Muc20, Acp3, Cdip1, Plaat3, Wasf2, Osbpl8, Mpc2, Ptprj, Rap1a, Scamp2, Man1a, Ubr4, Smim20, H2-D1, Tm2d2, Lims1, Man1a2, Ucp2 ,Kcnj5 ,Pkp4 ,Jak1, Ube2b, Dip2c, Cap1, Tm4sf1, Capns1, Sec62 ,Rap2a, Ap4s1, Stxbp5,Ndufa1, Erbin
16	Transcription regulation	0.118545	Nelfcd, Zfp664, Yap1, Sin3b, Gpbp1

## Sheet: Table S5B
Table S5B. DAVID functional clustering of DEGs (P < 0.05) in the platelets of TMEV-infected mice on day 7 p.i.
Cluster	Pathway	Enrichment Score	Genes
1	Synapse	3.29252	Znrf2, Rpl6, Bcl2l1, Rpl7, Cdh23, Syt11, Canx, Rpl9, Hnrnpa1, Psma3, Rplp2, Atp8a1, Anxa9, Nptn, Rpl23
2	Endoplasmic reticulum	3.05929	Dnajb9, Ccdc88a, Igtp, Bnip3l, Rpl6, Bcl2l1, Ms4a4c, Cst3, Canx, Ier3ip1, Acsl1, Atp2a3, Rtn4, Tmem64, Atp8a1, BC031181, Tor1aip2, H2-D1, Pnpla8, Tmem170, Sec61b, Bltp2
3	Mitochondrion	2.311	Tango2, Tk2, Igtp, Slc25a3, Ociad2, Bnip3l, mt-Tf, Bcl2l1, Golph3, Atp5f1e, Acsl1, Tomm34, Tomm20, Pnpla8, Snn, Bltp2
4	Ubl conjugation	2.02483	Dnmt1, Tubb2a, Rpl6, Rnf114, Pak2, Myh9, Vim, Canx, Smc1a, Ptk2, Kmt5b, Tomm20, H2-D1, Seh1l, Ikzf1, Krr1, Bcl2l1, Chtop, Dazap2, Pdcd4, Nusap1, Mpl, Syt11, Dhx9, Hnrnpa1, Tomm34, Nsd3
5	Axon	1.5194	Vim, Canx, Dyrk1a, Nptn, Syt11, Cst3
6	Endosome	1.328	Znrf2, Ociad2, Snx2, Stx7, Myh9, Golph3, Syt11, Washc2
7	Transport	1.27766	Slc25a3, Golph3, Washc2, Dhx9, Atp5f1e, Ier3ip1, Hnrnpa1, Atp2a3, Atp8a1, Tomm20, Snx2, Dgkd, Seh1l, Sec61b
8	RNA binding	1.2567	Vim, Hnrnpa1, Oas3, Dnmt1, Mex3c, Krr1, Rpl6, Rpl7, Chtop, Pdcd4, Dhx9
9	Lysosome	1.17825	Hexb, Znrf2, Snx2, Seh1l, Stx7, Syt11, Cst3
10	Angiogenesis	0.886947	Cald1, Sema4a, Ptk2, Myh9, Itga2b
11	Positive regulation of gene expression	0.85807	Vim, Hnrnpa1, Dnmt1, Trp53inp1, Ikzf1, Mpl, Rpl23
12	metal ion binding	0.831338	Klf13, Znrf2, Oas3, Dnmt1, Tubb2a, Rnf114, Cdh23, Syt11, Dhx9, Canx, Ankib1, Atp2a3, Rtn4, Kmt5b, Mex3c, Mob1a, Atp8a1, Nsd3, Dgkd, Snn, Itga2b, Ikzf1
13	Amyotrophic lateral sclerosis	0.694334	Atp5f1e, Hnrnpa1, Psma3, Tubb2a, Bcl2l1, Seh1l
14	negative regulation of apoptotic process	0.648048	Btg2, Ptk2, Bnip3l, Bcl2l1, Pak2, Golph3, Pdcd4, Mpl
15	Nucleotide-binding	0.553417	Tk2, Oas3, Igtp, Tubb2a, Pak2, Myh9, Dhx9, Dyrk1a, Acsl1, Smc1a, Atp2a3, Ptk2, Atp8a1, Dgkd
16	Membrane	0.551618	Ccdc88a, Bean1, Sema4a, Slc25a3, Gm10800, Gm10800, Nmt2, Cdh23, Pak2, Golph3, Washc2, Vim, Esam, Atp5f1e, Canx, Acsl1, Atp2a3, Ptk2, Tmem64, Snx2, Tomm20, H2-D1, Snn, Seh1l, Tmem170, Itga2b, Bltp2, Znrf2, Igtp, Bnip3l, Bcl2l1, Chtop, Mpl, Syt11, Ms4a4c, Ier3ip1, Tomm34, Rtn4, Atp8a1, Tor1aip2, Pnpla8, Gp1bb, Dgkd, Stx7, Nptn, Sec61b
17	WD40/YVTN repeat-like-containing domain	0.527665	Sema4a, Wdr13, Wdr89, Seh1l
18	Metabolic pathways	0.526275	Atp5f1e, Hexb, Acsl1, Tk2, Dnmt1, kmt5b, Nsd3, Dgkd
19	Hydrolase activity	0.477889	Atp5f1e, Hexb, Usp38, Iah1, Atp8a1, Gpcpd1, Pnpla8, Dhx9, Mindy1
20	Immunity	0.473016	Sema4a, Oas3, Igtp, H2-D1, Dhx9
21	Cell adhesion	0.46382	Easm, Cdh23, Gp1bb, Myh9, Itga2b, Nptn
22	PI3K-Akt signaling pathway	0.457069	Ptk2, Bcl2l1, Itga2b
23	Cell cycle	0.365987	Smc1a, Seh1l, Nusap1, Ikzf1
24	Innate immune response	0.27941	Iglc2, Oas3, Igtp, Ptk2, Dhx9
25	Immunoglobulin-like fold	0.17888	Easm, Iglc2, Sema4a, Gpcpd1, H2-D1, Nptn, Mpl
26	Transcription regulation	0.148471	Btg2, Dyrk1a, Klf13, Dnmt1, Trp53inp1, Kmt5b, Nsd3, Chtop, Ikzf1, Dhx9
27	DNA binding	0.114076	Hnrnpa1, Klf13, Smc1a, Dmnt1, Rpl7, Nusap1, Ikzf, Dhx9
28	Cell differentiation	0.0636569	Sh2b3, Sema4a, Ptk2, Rnf114

## Sheet: Table S5C
Table S5C. DAVID functional clustering of DEGs (P < 0.05) in the platelets of TMEV-infected mice on day 35 p.i.
Cluster	Pathway	Enrichment Score	Genes
1	Translational elongation	6.33027	mt-Tp, mt-Tt, mt-Tk, mt-T12, mt-Td, mt-Tf, mt-Tg, Eef1a1, Hbs1l, mt-tv
2	Nucleus	3.19971	Trim33, Rbbp7, Map3k2, Sufu, Ercc3, Tenm4, Bub3, Adcy10, Narf, Luc7l3, Dsg1a, Tep1, H2bc1, Srsf1, Srsf7, Smad5, Zfp451, Prkcd, Orc5, Taf1b, Fosl2, Dcaf1, Kdm5c, H1f2, Ramacl, Ramacl, Ccng1, Arid4b, Gm10487, Papolg, Gchfr, Tox3, Patl1, Tal1, Cmip, Cep290, H4c11, Emsy, Fem1b, Polr3k, Tnik, Smarcc1, Fkbp5, Ipo9, Clk4, Mindy3, Eloa, Aqr, Creb1, Adrm1b, Ttf1, Ss18, Plekho1, Fbxo3, Cpsf7, Cdan1, Hnrnph…
3	Ubl conjugation	2.79937	H4c18, H2bc21, Pold3, Eftud2, Arid4b, Pkm, Eif3j2, Vps50, Tal1, Ybx1, Cep290, H4c11, Eef1a1, Cul4a, Rps3a1
4	Pleckstrin homology-like domain	2.57009	Trim33, Rbbp7, Map3k2, Sufu, Smarcc1, Hprt1, Bub3, Luc7l3, Creb1, Ttf1, H2bc1, Srsf1, Cpsf7, Hnrnph1, Hcfc1, Srsf7, Glul, Tuba1b, Per1, Cav1, Fbf1, H2bc4, Usp10, Zfp451, Orc5, Fosl2, Asxl1, Diaph3, Ago3, Kdm5c, H4c17, Mdh1, Eno1, Vdac1, Akt1, Dnm1l, H4c18, H2bc21, Pold3, Eftud2, Arid4b, Pkm, Eif3j2, Eif3j2, Vps50, Tal1, Ybx1, Cep290, H4c11, Eef1a1, Cul4a, Rps3a1
5	Protein heterodimerization activity	2.03765	Tenm4, Cd3e, H4c17, H2bc23, Cav1, H2bc24, H2bc21, H2bc4, H4c18, H4c18, H4c11, Tlr6, Tcf4, Hbc1
6	Mitochondrion	1.78626	Nipsnap2, Stmp1, Stk11, Ndufs5, Dnajc19, Mrpl44, Scp2, Adcy10, Sdha, Gpd2, mt-Cytb, Vdac1, Dnm1l, Oxr1, Dars2, Chchd3, Cox5b, Glul, Cox15, Cyc1, Mrpl49, Ttc19, Gpx4, Ndufa7, Cyb5r3, Prkcd, Stard13, Ndufa1, Polg2
7	Endosome	1.60345	Rab11a, Lamp5, Ret, Ube2d3, Arrdc3, Tnik, Sla, Zfyve21, Tpcn2, Cav1, Vps50, Vps26c, Relch, Sbf2, Tlr7, Itsn1, Usp10, Atp6v0a2
8	P-loop containing nucleoside triphosphate hydrolase	1.48848	Orc5, Rab11a, Arf1, Septin11, Ercc3, Iqca1, Gm4841, Septin1, Gnaz, Smc1b, Eif4a2, Adcy10, Dlg3, Recql5, Aqr, Katnal1, Dnm1l, Slfn9, Myo3b, Tep1, Eef1a1, Eftud2, Hbs1l, Nlrp12
9	Elongation factor	1.47355	Eef1a1, Eftud2, Hbs1l
10	Zinc finger, RING/FYVE/PHD-type	1.45803	Trim56, Trim33, Trim67, Bptf, Rnf141, Zfyve21, Mtmr3
11	Rhythmic process	1.20865	Creb1, Dnm1l, Kdm5c, Nfya, Cul4a, Kat2b, Per1
12	C-type lectin fold	1.19212	Colec10, Clec14a, Klra1, Col4a6, Pla2r1, Clec1b, Clec4a3
13	mitochondrial inner membrane	1.07826	Cox5b, Stmp1, Cox15, Cyc1, Mrpl49, Ndufs5, Dnajc19, Mrpl44, Sdha, Gpx4, Gpd2, Ttc19, mt-Cytb, Ndufa7, Vdac1, Cyb5r3, Ndufa1, Chchd3
14	Vesicle-mediated transport	1.06459	Rab11a, Arf1, Mcfd2, Arcn1, Copa, Ap3d1, Syt15, Ap1g1
15	Protein transport	1.04638	Rab11a, Arf1, Mcfd2, Arcn1, Arrdc3, Copa, Ipo9, Ap3d1, Dnajc19, Cav1, Vps50, Sec62, Cep290, Vps54, Itsn1, Arl6ip5, Ap1g1
16	Initiation factor	1.00801	Eif3j2, Eif1b, Eif4a2
17	Endocytosis	1.00387	Dnm1l, Itsn1, Pla2r1, Sgip1, Pik3cg, Cav1
18	Nucleotide-binding	0.988714	Orc5, Rab11a, Map3k2, Arf1, Tnik, Septin11, Ercc3, Atp10d, Hprt1, Iqca1, Dcaf1, Gnaz, Stk11, Clk4, Chka, Adcy10, Slc27a2, Eif4a2, Aqr, Katnal1, Vdac1, Akt1, Dnm1l, Dars2, Myo3b
19	Bromodomain	0.952232	Trim33, Bptf, Kat2b
20	C2 calcium-dependent membrane targeting	0.950504	Itsn1, Plcb2, Prkcd, Plcg2, Unc13b, Syt15
21	Fc gamma R-mediated phagocytosis	0.898924	Akt1, Prkcd, Plcg2, Arpc1a, Asap3, Vav2
22	Meiotic cell cycle	0.894181	Gm4836, Clgn, Gm16405, Smc1b, Gm16430, Gm10487, Bub3
23	Calponin homology domain	0.871184	Parvb, Macf1, Vav2, Cnn2
24	EGF-like domain	0.864017	Clec14a, Mmrn1, Impg2, Pear1, Megf6, Tenm4
25	cGMP-PKG signaling pathway	0.862776	Creb1, Vdac1, Akt1, Plcb2, Kcnmb4, Trpc6, Pik3cg, Irs4, Pde5a
26	Src homology-3 domain	0.858571	Istn1, Plcg2, Sla, Macf1, Vav2, Arhgap12, Dlg3
27	Leucine-rich repeat	0.808198	Rsu1, Gp5, Cmip, Tlr7, Tlr6, Macf1, Nlrp12
28	Platelet activation	0.800722	Gp5, Akt1, Plcb2, Plcg2, Pik3cg
29	Actin binding	0.789013	Parvb, Sntb1, Vcl, Tmod3, Myo3b, Diaph3, Cyfip1, Macf1, Arpca1, Trpc6, Cnn2
30	Actin cytoskeleton	0.788058	Parvb, Vcl, Macf1, Arpc1a, Epha3, Cnn2
31	Intracellular protein transport	0.781917	Vps26c, Arf1, Copa, Ipo9, Ap3d1, Ap1g1
32	Armadillo-like helical	0.781361	Togaram1, Relch, Diaph3, Dcaf1, Ipo9, Ap3d1, Ap1g1
33	Chemokine signaling pathway	0.752709	Pard3, Akt1, Plcb2, Prkcd, Plcg2, Pik3cg, Vav2
34	Mitochondrial outer membrane	0.715082	Nipsnap2, Vdac1, Dnm1l, Cyb5r3, Stmp1, Slc44a2
35	Peptidase activity	0.703492	Blmh, Amz2, Aopep, Slpi, Usp38, Usp10, Ncstn, Mindy3
36	EF-hand-like domain	0.702828	Gpd2, Usp32, Istn1, Plcb2, Mcfd2, Fstl1, Plcg2, Macf1, Mindy3
37	Golgi apparatus	0.693739	Slc35d2, Rab11a, Arf1, Cerkl, Macf1, Dnm1l, Slpi, Vps54, Plcb2, Tg, Ap1g1, Fndc3a, Mcfd2, Arcn1, Cd3e, Unc13b, Copa, Ncstn, Smpd4, Ap3d1, Cav1, Colec10, H2-Bl, Usp32, Relech, Cert1, Tlr6, Xylt1
38	mRNA processing	0.682946	Aqr, Luc7l3, Hnrnph1, Ybx1, Srsf7, Papolg, Eftud2, Srsf1, Cpsf7
39	WD40/YVTN repeat-like-containing domain	0.662328	Rbbp7, Dcaf1, Tep1, Dync2i1, Copa, Arpc1a, Bub3
40	Protein kinase C-like, phorbol ester/diacylglycerol binding	0.642501	Prkcd, Unc13b, Vav2
41	Zinc finger, RING-type, conserved site	0.611699	Trim56, Trim33, Trim67, Rnf141
42	RNA binding	0.595113	Hnrnph1, Rbbp7, Srsf7, Rbm6, Dtd1, Ago3, Papolg, Eif1b, Msi2, Mrpl44, Eno1, Eif4a2, Parl1, Aqr, Ramacl, Ybx1, Tep1, Srsf1, Cpsf7
43	Catalytic activity	0.590913	Shmt1, Glul, Pkm, Parp2, Mdh1, Pde5a
44	Endonuclease activity	0.573957	Slfn9, Sgip1, Ago3, Mrpl44
45	Autophagy - animal	0.570978	Akt1, Prkcd, Mtmr3, Stk11, Irs4
46	Cellular response to DNA damage stimulus	0.566207	Recql5, Akt1, Ube2d3, Usp10, Pold3, Ercc3, Prkcd, Parp2, Stk11, Cul4a, Emsy
47	Fibronectin type-III	0.545815	Fndc3a, Hcfc1, Trim67, Cntn6, Epha3
48	Growth hormone synthesis, secretion and action	0.544365	Creb1, Akt1, Plcb2, Plcg2, Irs4, Adcy10
49	Pathways in cancer	0.531744	Vegfc, Ret, Akt1, Col4a6, Sufu, Plcb2, Plcg2
50	Endoplasmic reticulum	0.496947	Clgn, Ccdc47, Atp10d, Cerkl, Dnajc1, Scp2, Slc27a2, Dnm1l, Tlr7, Tg, Arl6ip5, Cmah, Hacd4, Glul, Mcfd2, Arcn1, Cd3e, Ncstn, Smpd4, Tecrl, Cav1, Erlec1, H2-Bl, Sec62, Ybx1, Cert1, Cyb5r3, Alox5ap, Prkcd, B3glct, Ces2e, Rps3a1
51	PI3K-Akt signaling pathway	0.487084	Creb1, Vegfc, Akt1, Itga11, Col4a6, Stk11, Pik3cg
52	Lipoprotein	0.457823	Rab11a, Arf1, Glul, Cntn6, Sla, Cd55, Gnaz, Stk11, Cav1, Cd52, Vcl, Cyb5r3, Rnf141, Chchd3
53	Metabolic process	0.387744	Pkm, Naglu, Parp2, Pde5a
54	Cilium assembly	0.384483	Togaram1, Fbf1, Cep290, Cfap53, Dync2i1
55	Helicase activity	0.376801	Aqr, Recql5, Ercc3, Eif4a2
56	Cilium	0.364489	Togaram1, Cep290, Slc9c1, Sufu, Cfap53, Pkm, Iqca1, Dync2i1, Cav1
57	REPEAT:1	0.341919	Vedfc, Srsf7, Vcl, Ss18
58	Transcription regulation	0.288051	Taf1b, Med12l, Trim33, Fosl2, Rbbp7, Smarcc1, Ercc3, Dcaf1, Asxl1, Kdm5c, Nfyc, Eloa, Creb1, Ttf1, Bptf, Ss18, Arid4b, Chchd3, Smad5, Per1, Tox3, Tal1, Ybx1, Cep290, Zfp451, Tcf4, Emsy, Kat2b
59	Ribonucleoprotein complex	0.284462	Hnrnph1, Ybx1, Tep1, Ago3, Eftud2, Mrpl49, Mrpl49, Rps3a1
60	Immunoglobulin domain	0.274933	Icam2, Gm49339, Btla, Btnl10, Cntn6, Nfam1, Cd3e, Ighm
61	Cell cycle	0.272261	Rab11a, Hcfc1, Septin11, Septin1, Stk11, Smc1b, Bub3, Recql5, Pard3, Ccng1, Stard13, Prkcd, Kat2b
62	immune system process	0.212114	Trim56, Slpi, Polr3k, Tlr7, Btla, Stmp1, Cd3e, Tlr6, Cd55, Pik3cg
63	RNA polymerase II core promoter proximal region sequence-specific DNA binding	0.199378	Creb1, Tal1, Fosl2, Hcfc1, Bptf, Zfp869, Tcf4, Smad5, Nfya, Per1
64	Ankyrin repeat	0.190614	Fem1b, Ankrd44, Trpc6, Asap3
65	PDZ domain	0.184624	Pard3, Sntb1, Dlg3
66	Cell differentiation	0.112978	Vegfc, Clgn, Slc9c1, Dnmt3c, Tenm4, Sla, Stk11, Smad5, Cav1, Creb1, Tal1, Pard3, Fstl1, Cyfip1, Tcf4, Rps3a1
67	Ion transport	0.1051	Vdac1, Cnnm4, Slc9c1, Atp6v0a2, Kcnmb4, Ttyh3, Tpcn2, Glra2, Trpc6
68	Immunoglobulin-like fold	0.0975518	Fndc3a, Trim67, Hcfc1, Btla, Btnl10, Cntn6, Trav13-5, Cd3e, H2-Bl, Gm49339, Icam2, Ccdc141, IgKv4-57-1, Trdv2,-2, Epha3, Ighm
69	Membrane	0.0937267	Rab11a, Nipsnap2, Clgn, Arf1, Stmp1, Tenm4, Adcy10, Nckap1l, Rgsl1, Impg2, Icam2, Dsg1a, Atp6v0a2, Rnf141, Trpc6, Sh2d2a, Fndc3a, Cntn6, Copa, Unc13b, Cd55, Ncstn, Pik3cg, Slc44a, Cav1, Tm4sf1, Or51ah3, Sbf2, Vcl, Prkcd, Stard13, Tlr6, Xylt1, Epha3, Slc35d2, Ccdc47, Eno1, Slc27a2, 181003711Rik, Clec4a3, Gpd2, Vmn2r43, Ap1g1, Cox5b, Ret, Sntb1, Ube2d3, Arcn1, Acp2, Cd3e, Gchfr, Cd52, Vps50, Ttc19,…
70	Metal-binding	0.0891184	Trim33, Polr3k, Itga11, Map3k2, Atop10d, Hprt1, Vav2, Jade2, Adcy10, Dsg1a, Plcb2, Gm14327, Cmah, Rnf141, Trim67, Srsf7, Glul, Ciao3, Cyc1, Unc13b, Smad5, Tuba1b, Amz2, Itsn1, Zfp451, Prkcd, Zfp869, Xylt1, Glra2, Asap3, Rsf1, Taf1b, Rbm6, Dtd1, Sgip1, Asxl1, Ago3, Gnaz, Kdm5c, Stk11, Macf1, Eno1, Gpd2, Gm21411, mt-Cytb, Trim56, Aopep, Bptf, Pde5a, Cox5b, Mcfd2, Pkm, Dnmt3c, Papolg, Zfyve21, Smpd4…
71	Negative regulation of gene expression	0.0538935	Creb1, Akt1, Cd3e, Tcf4, Smad5
72	Zinc finger C2H2-type/integrase DNA-binding domain	0.00579536	Gm21411, Rbm6, Zfp451, Zfp869, Gm14327
73	Helical; Name=1	0.000518017	Kcnmb4, Ttyh3, Glra2, Gpr26
74	Transducer	1.58737e-06	Or51ah3, Vmn2r39, Plcb2, Plcg2, Vmn2r43, Gnaz, Irs4, Gpr26
