# Supplementary material for: Exploring the Role of Platelets in Virus-Induced Inflammatory Demyelinating Disease and Myocarditis
Source: Int J Mol Sci. 2024 Mar 19;25(6):3460. doi: 10.3390/ijms25063460 (PMC10970283; doi:10.3390/ijms25063460)
Supplement: Supplementary file 1 [file ijms-25-03460-s001.zip › Supplemental Table S6.xlsx]

## Sheet: Radar Chart
K-means clustering of platelet transcriptome data
Davis-Bouldin index: The number of clusters was determined by Davis-Bouldin Index.
#	db
3	1.62592
4	1.61863
5	1.52007
6	1.48538
7	1.33957
8	1.27707
9	1.23864
Cluster centers
	Day 4	Day 7	Day 35
1	-1.65504	0.20189	0.01302
2	0.23102	-1.5703	-0.12019
3	0.17748	1.5015	-0.14972
4	0.16337	0.24078	-1.57334
5	0.02068	0.02443	-0.0079
6	0.06391	0.07849	0.52847
7	0.16647	0.20262	1.46444
8	0.05458	0.06872	-0.58848
9	1.71	0.21111	-0.14015

## Sheet: All Clusters
Cluster #	Gene ID	Day 4	Day 7	Day 35	Gene Symbol	Gene name
1	ENSMUSG00000086714	-1.03994	1.00327	0.00789879	0610009E02Rik	RIKEN cDNA 0610009E02 gene
1	ENSMUSG00000098912	-1.83304	0.714978	-0.548388	1500004A13Rik	RIKEN cDNA 1500004A13 gene
1	ENSMUSG00000032666	-1.43316	1.44312	-1.04616	1700025G04Rik	RIKEN cDNA 1700025G04 gene
1	ENSMUSG00000097080	-1.02249	0	0.259409	1700086O06Rik	RIKEN cDNA 1700086O06 gene
1	ENSMUSG00000040822	-1.22004	0.437379	-0.904635	1700123O20Rik	RIKEN cDNA 1700123O20 gene
1	ENSMUSG00000009114	-1.95583	0	-0.895337	2610028H24Rik	RIKEN cDNA 2610028H24 gene
1	ENSMUSG00000085936	-1.50275	0	0.0760098	2610307P16Rik	RIKEN cDNA 2610307P16 gene
1	ENSMUSG00000071181	-0.911247	0	-0.29508	3830408C21Rik	RIKEN cDNA 3830408C21 gene
1	ENSMUSG00000025871	-1.25204	-0.681631	-1.04635	4833439L19Rik	RIKEN cDNA 4833439L19 gene
1	ENSMUSG00000085198	-0.900406	0	0.207145	4933416E03Rik	RIKEN cDNA 4933416E03 gene
1	ENSMUSG00000052291	-1.00258	0	0.367818	5330438D12Rik	RIKEN cDNA 5330438D12 gene
1	ENSMUSG00000078684	-1.93768	0.759922	-0.113978	5830417I10Rik	RIKEN cDNA 5830417I10 gene
1	ENSMUSG00000031824	-3.55462	0.321129	-0.0766712	6430548M08Rik	RIKEN cDNA 6430548M08 gene
1	ENSMUSG00000086693	-0.947218	0	0.0386456	A730081D07Rik	RIKEN cDNA A730081D07 gene
1	ENSMUSG00000018800	-1.38486	0.321314	-0.245772	Abca5	ATP-binding cassette, sub-family A (ABC1), member 5
1	ENSMUSG00000035722	-1.36057	0.113466	-1.02903	Abca7	ATP-binding cassette, sub-family A (ABC1), member 7
1	ENSMUSG00000032724	-1.20878	0	-0.142081	Abtb2	ankyrin repeat and BTB (POZ) domain containing 2
1	ENSMUSG00000001588	-0.925252	-0.214097	0.255115	Acap1	ArfGAP with coiled-coil, ankyrin repeat and PH domains 1
1	ENSMUSG00000020777	-1.92356	-0.965709	-0.424891	Acox1	acyl-Coenzyme A oxidase 1, palmitoyl
1	ENSMUSG00000032561	-1.21514	-0.357253	-0.903977	Acp3	acid phosphatase 3
1	ENSMUSG00000031972	-1.30438	0.100455	1.11111	Acta1	actin alpha 1, skeletal muscle
1	ENSMUSG00000029580	-2.47514	-1.35037	0.645999	Actb	actin, beta
1	ENSMUSG00000087569	-0.998068	-0.565448	-0.0895	Actb-ps1	actin, beta, pseudogene 1
1	ENSMUSG00000068614	-1.97166	0.100455	1.6159	Actc1	actin, alpha, cardiac muscle 1
1	ENSMUSG00000020152	-2.72034	-1.75976	1.8982	Actr2	ARP2 actin-related protein 2
1	ENSMUSG00000022994	-1.42179	-0.287191	0.565918	Adcy6	adenylate cyclase 6
1	ENSMUSG00000020629	-1.16336	0.0810263	0.189167	Adi1	acireductone dioxygenase 1
1	ENSMUSG00000029165	-1.68433	-1.22321	1.13555	Agbl5	ATP/GTP binding protein-like 5
1	ENSMUSG00000029722	-1.71274	0.0718709	-1.31382	Agfg2	ArfGAP with FG repeats 2
1	ENSMUSG00000037692	-1.40659	0	0.0439705	Ahdc1	AT hook, DNA binding motif, containing 1
1	ENSMUSG00000078307	-0.900406	0.141522	-0.531095	AI593442	expressed sequence AI593442
1	ENSMUSG00000087107	-1.25835	0.44767	0.186306	AI662270	expressed sequence AI662270
1	ENSMUSG00000028029	-1.01253	0.0810263	0	Aimp1	aminoacyl tRNA synthetase complex-interacting multifunctional protein 1
1	ENSMUSG00000028692	-1.43014	0.609432	-1.06894	Akr1a1	aldo-keto reductase family 1, member A1 (aldehyde reductase)
1	ENSMUSG00000018924	-0.909636	0.230014	-0.196373	Alox15	arachidonate 15-lipoxygenase
1	ENSMUSG00000040506	-1.87641	0	0.420053	Ambra1	autophagy/beclin 1 regulator 1
1	ENSMUSG00000038115	-1.3104	0.752022	0.38499	Ano2	anoctamin 2
1	ENSMUSG00000024659	-2.15943	1.72016	-0.412465	Anxa1	annexin A1
1	ENSMUSG00000009090	-1.26243	0.875353	1.33177	Ap1b1	adaptor protein complex AP-1, beta 1 subunit
1	ENSMUSG00000003033	-1.06906	0.294557	0.108563	Ap1m1	adaptor-related protein complex AP-1, mu subunit 1
1	ENSMUSG00000022841	-2.19334	1.56437	0.561634	Ap2m1	adaptor-related protein complex 2, mu 1 subunit
1	ENSMUSG00000081272	-1.54093	1.41019	1.22459	Ap2m1-ps	adaptor-related protein complex 2, mu 1 subunit, pseudogene
1	ENSMUSG00000018481	-2.50003	-0.541925	-0.23279	Appbp2	amyloid beta precursor protein (cytoplasmic tail) binding protein 2
1	ENSMUSG00000048076	-2.08437	0.331785	-0.99819	Arf1	ADP-ribosylation factor 1
1	ENSMUSG00000039031	-2.69679	0.556519	0.742965	Arhgap18	Rho GTPase activating protein 18
1	ENSMUSG00000030220	-1.51157	1.02233	0.435509	Arhgdib	Rho, GDP dissociation inhibitor (GDI) beta
1	ENSMUSG00000059495	-2.72192	-0.690235	-0.919259	Arhgef12	Rho guanine nucleotide exchange factor (GEF) 12
1	ENSMUSG00000033237	-1.16866	-1.06326	0.361424	Arid2	AT rich interactive domain 2 (ARID, RFX-like)
1	ENSMUSG00000047446	-1.25456	-0.38871	0.340919	Arl4a	ADP-ribosylation factor-like 4A
1	ENSMUSG00000006304	-1.42207	1.29856	1.52336	Arpc2	actin related protein 2/3 complex, subunit 2
1	ENSMUSG00000007656	-1.04296	0	0.735353	Arpp19	cAMP-regulated phosphoprotein 19
1	ENSMUSG00000032503	-1.74904	-0.0855059	-1.50914	Arpp21	cyclic AMP-regulated phosphoprotein, 21
1	ENSMUSG00000018909	-1.46619	1.3567	-0.6652	Arrb1	arrestin, beta 1
1	ENSMUSG00000032905	-2.44543	0.0929941	-0.574385	Atg12	autophagy related 12
1	ENSMUSG00000036002	-0.879336	0.487496	-0.0353943	Atosb	atos homolog B
1	ENSMUSG00000018585	-1.33223	0.0336042	0.74437	Atox1	antioxidant 1 copper chaperone
1	ENSMUSG00000038717	-1.81128	-0.35603	0.600801	Atp5l	ATP synthase, H+ transporting, mitochondrial F0 complex, subunit G
1	ENSMUSG00000071528	-1.13072	-0.178919	0.262046	Atp5md	ATP synthase membrane subunit DAPIT
1	ENSMUSG00000000563	-2.03747	1.0007	-0.108102	Atp5pb	ATP synthase peripheral stalk-membrane subunit b
1	ENSMUSG00000044751	-0.829355	0.230014	0.112857	Atp5pb-ps	ATP synthase peripheral stalk-membrane subunit b, pseudogene
1	ENSMUSG00000052459	-1.97054	0.449041	0.771515	Atp6v1a	ATPase, H+ transporting, lysosomal V1 subunit A
1	ENSMUSG00000054428	-2.29927	-0.0780852	1.66308	Atpif1	ATPase inhibitory factor 1
1	ENSMUSG00000027312	-4.43039	-1.80285	-1.49699	Atrn	attractin
1	ENSMUSG00000074748	-2.97286	1.5015	2.34762	Atxn7l3b	ataxin 7-like 3B
1	ENSMUSG00000024182	-1.29069	0	-0.761127	Axin1	axin 1
1	ENSMUSG00000000142	-2.84001	0.424007	1.58028	Axin2	axin 2
1	ENSMUSG00000037922	-2.16491	0.237436	-0.736656	Bank1	B cell scaffold protein with ankyrin repeats 1
1	ENSMUSG00000025316	-0.829784	0.731125	-0.0624136	Banp	BTG3 associated nuclear protein
1	ENSMUSG00000031755	-0.900406	0	-0.376075	Bbs2	Bardet-Biedl syndrome 2 (human)
1	ENSMUSG00000020650	-2.05373	0	-0.0906721	Bcap29	B cell receptor associated protein 29
1	ENSMUSG00000000861	-2.27561	-0.0614158	0.136766	Bcl11a	B cell CLL/lymphoma 11A (zinc finger protein)
1	ENSMUSG00000048251	-2.59403	0.502424	1.05327	Bcl11b	B cell leukemia/lymphoma 11B
1	ENSMUSG00000048186	-0.900406	0	0.168078	Bend7	BEN domain containing 7
1	ENSMUSG00000025484	-1.67344	1.86463	1.1121	Bet1l	Bet1 golgi vesicular membrane trafficking protein like
1	ENSMUSG00000024073	-1.63345	0.627245	-0.546572	Birc6	baculoviral IAP repeat-containing 6
1	ENSMUSG00000011958	-1.05804	0.445844	0.841092	Bnip2	BCL2/adenovirus E1B interacting protein 2
1	ENSMUSG00000038572	-1.09397	0	-0.200151	Bpifb5	BPI fold containing family B, member 5
1	ENSMUSG00000066324	-1.60423	1.834	-1.38033	Bpnt2	3'(2'), 5'-bisphosphate nucleotidase 2
1	ENSMUSG00000037905	-1.47444	0.417446	0.769003	Bri3bp	Bri3 binding protein
1	ENSMUSG00000066979	-1.29011	1.31359	-1.32813	Bub3	BUB3 mitotic checkpoint protein
1	ENSMUSG00000028532	-0.900406	0	0.276944	Cachd1	cache domain containing 1
1	ENSMUSG00000014592	-1.41185	-0.366349	1.34171	Camta1	calmodulin binding transcription activator 1
1	ENSMUSG00000028656	-2.48458	-0.335329	0.956947	Cap1	CAP, adenylate cyclase-associated protein 1 (yeast)
1	ENSMUSG00000001794	-2.3265	0.544755	1.28422	Capns1	calpain, small subunit 1
1	ENSMUSG00000027562	-1.10147	-1.0708	0.643203	Car2	carbonic anhydrase 2
1	ENSMUSG00000027187	-0.896118	-0.59524	0.0552192	Cat	catalase
1	ENSMUSG00000004044	-1.20984	1.11911	-0.253336	Cavin1	caveolae associated 1
1	ENSMUSG00000020074	-1.12935	0.98067	0.887935	Ccar1	cell division cycle and apoptosis regulator 1
1	ENSMUSG00000033712	-1.55966	-0.324191	-0.193765	Ccar2	cell cycle activator and apoptosis regulator 2
1	ENSMUSG00000049957	-0.900406	0	-0.21946	Ccdc137	coiled-coil domain containing 137
1	ENSMUSG00000052407	-0.925252	0	-0.086039	Ccdc171	coiled-coil domain containing 171
1	ENSMUSG00000020925	-1.10895	-0.503228	0.108785	Ccdc43	coiled-coil domain containing 43
1	ENSMUSG00000000378	-2.07685	0.256755	-1.81737	Ccm2	cerebral cavernous malformation 2
1	ENSMUSG00000002068	-1.55298	0.0810263	-0.952332	Ccne1	cyclin E1
1	ENSMUSG00000021548	-1.36575	-1.22713	1.08013	Ccnh	cyclin H
1	ENSMUSG00000027829	-0.955608	0.704233	-0.176718	Ccnl1	cyclin L1
1	ENSMUSG00000024286	-2.06249	1.16008	-1.66072	Ccny	cyclin Y
1	ENSMUSG00000025510	-1.36515	0.0561042	-0.109157	Cd151	CD151 antigen
1	ENSMUSG00000021624	-2.122	0.536138	0.478673	Cd180	CD180 antigen
1	ENSMUSG00000031494	-1.23927	0.0810263	-0.164098	Cd209a	CD209a antigen
1	ENSMUSG00000024610	-1.8918	0.746296	0.690335	Cd74	CD74 antigen (invariant polypeptide of major histocompatibility complex, class II antigen-associated)
1	ENSMUSG00000038147	-1.01697	-0.521296	-0.0711601	Cd84	CD84 antigen
1	ENSMUSG00000053977	-1.28931	1.62537	1.10309	Cd8a	CD8 antigen, alpha chain
1	ENSMUSG00000021279	-1.95114	-1.68684	-1.3836	Cdc42bpb	CDC42 binding protein kinase beta
1	ENSMUSG00000025370	-0.900406	0.0810263	0.514714	Cdh9	cadherin 9
1	ENSMUSG00000004071	-1.38485	0.255825	0.423434	Cdip1	cell death inducing Trp53 target 1
1	ENSMUSG00000029062	-1.98931	0.714978	-0.530036	Cdk11b	cyclin dependent kinase 11B
1	ENSMUSG00000002107	-1.48682	0.00931855	0.520834	Celf2	CUGBP, Elav-like family member 2
1	ENSMUSG00000023473	-1.09397	0.506311	-0.139574	Celsr3	cadherin, EGF LAG seven-pass G-type receptor 3
1	ENSMUSG00000022677	-1.5266	-1.4905	-0.256377	Cep20	centrosomal protein 20
1	ENSMUSG00000021537	-0.965902	0	0.358243	Cetn3	centrin 3
1	ENSMUSG00000020462	-0.900406	0.230014	-0.143964	Cfap36	cilia and flagella associated protein 36
1	ENSMUSG00000056608	-1.27119	0.321751	-0.100571	Chd9	chromodomain helicase DNA binding protein 9
1	ENSMUSG00000014077	-3.12753	1.42476	0.779757	Chp1	calcineurin-like EF hand protein 1
1	ENSMUSG00000068391	-1.28891	1.00854	0.135137	Chrac1	chromatin accessibility complex 1
1	ENSMUSG00000045193	-1.6634	-1.3461	0.320458	Cirbp	cold inducible RNA binding protein
1	ENSMUSG00000047230	-0.900406	0.0810263	-0.0906631	Cldn2	claudin 2
1	ENSMUSG00000030144	-1.24201	1.32566	1.33299	Clec4d	C-type lectin domain family 4, member d
1	ENSMUSG00000037242	-1.11154	0.490408	-0.804104	Clic4	chloride intracellular channel 4 (mitochondrial)
1	ENSMUSG00000006169	-0.99354	-0.263114	0.74011	Clint1	clathrin interactor 1
1	ENSMUSG00000016756	-2.97696	0.582221	-2.59312	Cmah	cytidine monophospho-N-acetylneuraminic acid hydroxylase
1	ENSMUSG00000062585	-1.84478	0.116001	-1.20296	Cnr2	cannabinoid receptor 2 (macrophage)
1	ENSMUSG00000001435	-1.95067	-0.189185	0.423725	Col18a1	collagen, type XVIII, alpha 1
1	ENSMUSG00000034807	-0.900406	0.40584	0.0164803	Colgalt1	collagen beta(1-O)galactosyltransferase 1
1	ENSMUSG00000073616	-0.798837	0.795314	0.336766	Cops9	COP9 signalosome subunit 9
1	ENSMUSG00000036751	-1.80661	-0.593488	0.128423	Cox6b1	cytochrome c oxidase, subunit 6B1
1	ENSMUSG00000035885	-2.04349	-1.27314	-0.261707	Cox8a	cytochrome c oxidase subunit 8A
1	ENSMUSG00000055531	-1.33631	0.885077	0.0632498	Cpsf6	cleavage and polyadenylation specific factor 6
1	ENSMUSG00000028607	-1.5588	0.628323	-0.96495	Cpt2	carnitine palmitoyltransferase 2
1	ENSMUSG00000036377	-4.13716	-0.0089793	-0.101095	Cracd	capping protein inhibiting regulator of actin
1	ENSMUSG00000023272	-1.50031	-0.709302	-0.0186451	Creld2	cysteine-rich with EGF-like domains 2
1	ENSMUSG00000033488	-0.992047	0.524993	-0.720556	Cryzl2	crystallin zeta like 2
1	ENSMUSG00000068823	-2.29514	2.00312	0.546769	Csde1	cold shock domain containing E1, RNA binding
1	ENSMUSG00000042042	-1.62022	-0.00136408	0.262977	Csgalnact2	chondroitin sulfate N-acetylgalactosaminyltransferase 2
1	ENSMUSG00000022433	-1.17871	0.698028	-0.930151	Csnk1e	casein kinase 1, epsilon
1	ENSMUSG00000030470	-1.08441	-0.197911	-0.138778	Csrp3	cysteine and glycine-rich protein 3
1	ENSMUSG00000044258	-2.53705	-0.214583	0.0065024	Ctla2a	cytotoxic T lymphocyte-associated protein 2 alpha
1	ENSMUSG00000016256	-2.86634	1.11917	0.615005	Ctsz	cathepsin Z
1	ENSMUSG00000026870	-0.900406	0	0	Cutal	cutA divalent cation tolerance homolog-like
1	ENSMUSG00000039294	-1.44619	-0.43515	0.826099	Cybc1	cytochrome b 245 chaperone 1
1	ENSMUSG00000026832	-1.6814	0.262108	-1.49128	Cytip	cytohesin 1 interacting protein
1	ENSMUSG00000026554	-2.67043	0.105988	2.11728	Dcaf8	DDB1 and CUL4 associated factor 8
1	ENSMUSG00000029366	-1.71578	0.800085	-0.0440786	Dck	deoxycytidine kinase
1	ENSMUSG00000025410	-1.38276	0	0.75128	Dctn2	dynactin 2
1	ENSMUSG00000020108	-1.69508	1.58841	-0.287546	Ddit4	DNA-damage-inducible transcript 4
1	ENSMUSG00000021377	-2.02577	-0.0027876	-0.0466306	Dek	DEK proto-oncogene (DNA binding)
1	ENSMUSG00000026502	-1.3171	1.04545	1.23898	Desi2	desumoylating isopeptidase 2
1	ENSMUSG00000025357	-1.32985	-0.667238	-0.410037	Dgka	diacylglycerol kinase, alpha
1	ENSMUSG00000034449	-1.55674	0.171263	-0.693693	Dhrs11	dehydrogenase/reductase (SDR family) member 11
1	ENSMUSG00000048264	-2.29057	0.921176	-1.0258	Dip2c	disco interacting protein 2 homolog C
1	ENSMUSG00000025857	-1.28751	0	0.795388	Dnaaf5	dynein, axonemal assembly factor 5
1	ENSMUSG00000052273	-1.22248	0	0.439947	Dnah3	dynein, axonemal, heavy chain 3
1	ENSMUSG00000028410	-1.73089	0.636719	-0.450875	Dnaja1	DnaJ heat shock protein family (Hsp40) member A1
1	ENSMUSG00000005483	-0.982894	0.539524	-0.568372	Dnajb1	DnaJ heat shock protein family (Hsp40) member B1
1	ENSMUSG00000019088	-1.52111	-0.741223	-1.28914	Dnase1l1	deoxyribonuclease 1-like 1
1	ENSMUSG00000075467	-2.2647	0	-0.356142	Dnlz	DNL-type zinc finger
1	ENSMUSG00000024826	-2.51298	-0.325373	0.304908	Dpf2	double PHD fingers 2
1	ENSMUSG00000022304	-2.44042	0.975924	-0.387346	Dpys	dihydropyrimidinase
1	ENSMUSG00000029005	-1.16427	0	-0.582985	Draxin	dorsal inhibitory axon guidance protein
1	ENSMUSG00000030002	-2.3525	0.708554	-0.218288	Dusp11	dual specificity phosphatase 11 (RNA/RNP complex 1-interacting)
1	ENSMUSG00000020483	-1.88035	-1.03612	-0.748978	Dynll2	dynein light chain LC8-type 2
1	ENSMUSG00000082691	-1.6522	-1.23789	0.253728	Dynlt1-ps1	dynein light chain Tctex-type 1, pseuodogene 1
1	ENSMUSG00000021890	-0.879064	0.911098	0.4004	Eaf1	ELL associated factor 1
1	ENSMUSG00000025465	-1.92978	1.19169	0.812243	Echs1	enoyl Coenzyme A hydratase, short chain, 1, mitochondrial
1	ENSMUSG00000071644	-1.69814	-0.822541	-1.36708	Eef1g	eukaryotic translation elongation factor 1 gamma
1	ENSMUSG00000034994	-1.83011	-1.43408	-0.00414843	Eef2	eukaryotic translation elongation factor 2
1	ENSMUSG00000006941	-1.414	-0.238415	-1.39218	Eif1b	eukaryotic translation initiation factor 1B
1	ENSMUSG00000025580	-2.46791	-0.540015	-1.69102	Eif4a3	eukaryotic translation initiation factor 4A3
1	ENSMUSG00000094973	-1.00949	-0.309439	-0.411899	Eif4a3l1	eukaryotic translation initiation factor 4A3 like 1
1	ENSMUSG00000058655	-2.33857	1.55835	-0.115977	Eif4b	eukaryotic translation initiation factor 4B
1	ENSMUSG00000045983	-1.74123	-0.214097	0.763395	Eif4g1	eukaryotic translation initiation factor 4, gamma 1
1	ENSMUSG00000027613	-0.900406	-0.131019	0.217931	Eif6	eukaryotic translation initiation factor 6
1	ENSMUSG00000041112	-1.92403	1.70021	1.02884	Elmo1	engulfment and cell motility 1
1	ENSMUSG00000041220	-1.16002	0.407768	0.675689	Elovl6	ELOVL family member 6, elongation of long chain fatty acids (yeast)
1	ENSMUSG00000030286	-1.06535	0.135081	-0.366377	Emc3	ER membrane protein complex subunit 3
1	ENSMUSG00000027131	-2.33811	1.25231	1.3643	Emc4	ER membrane protein complex subunit 4
1	ENSMUSG00000063524	-3.44058	2.22828	-2.43271	Eno1	enolase 1, alpha non-neuron
1	ENSMUSG00000059040	-3.64458	1.69333	-1.99265	Eno1b	enolase 1B, retrotransposed
1	ENSMUSG00000006235	-0.922682	-0.0784107	-0.315305	Epor	erythropoietin receptor
1	ENSMUSG00000005881	-2.79125	0.332976	-0.0587697	Ergic3	ERGIC and golgi 3
1	ENSMUSG00000036552	-1.10543	0.821349	-0.274514	Ermard	ER membrane associated RNA degradation
1	ENSMUSG00000089875	-1.04427	0.342028	-0.498857	Etohd2	ethanol decreased 2
1	ENSMUSG00000006920	-1.61476	-1.32716	1.01183	Ezh1	enhancer of zeste 1 polycomb repressive complex 2 subunit
1	ENSMUSG00000031444	-1.42807	-1.14181	1.30939	F10	coagulation factor X
1	ENSMUSG00000041629	-1.29698	1.51928	-0.997822	Fam104a	family with sequence similarity 104, member A
1	ENSMUSG00000036501	-3.59234	-0.987677	-1.83548	Fam13b	family with sequence similarity 13, member B
1	ENSMUSG00000064138	-1.46654	0.0430172	-0.697253	Fam172a	family with sequence similarity 172, member A
1	ENSMUSG00000095595	-0.847857	0.573523	-0.218344	Fam177a	family with sequence similarity 177, member A
1	ENSMUSG00000038121	-2.15671	0.284425	-1.48661	Fam210a	family with sequence similarity 210, member A
1	ENSMUSG00000030207	-2.05608	0	-1.5453	Fam234b	family with sequence similarity 234, member B
1	ENSMUSG00000030956	-1.30132	-0.761915	-0.217521	Fam53b	family with sequence similarity 53, member B
1	ENSMUSG00000050592	-2.29743	0.907059	-0.659772	Fam78a	family with sequence similarity 78, member A
1	ENSMUSG00000038274	-1.38613	-0.253175	-0.463865	Fau	Finkel-Biskis-Reilly murine sarcoma virus (FBR-MuSV) ubiquitously expressed (fox derived)
1	ENSMUSG00000023965	-2.02742	1.07608	1.54524	Fbxl17	F-box and leucine-rich repeat protein 17
1	ENSMUSG00000024742	-0.911341	0	0.140527	Fen1	flap structure specific endonuclease 1
1	ENSMUSG00000023092	-1.40682	-0.232693	-0.144286	Fhl1	four and a half LIM domains 1
1	ENSMUSG00000019054	-2.77909	1.31065	1.37925	Fis1	fission, mitochondrial 1
1	ENSMUSG00000032966	-2.22353	1.19203	0.747455	Fkbp1a	FK506 binding protein 1a
1	ENSMUSG00000040013	-1.78553	0.276184	0	Fkbp6	FK506 binding protein 6
1	ENSMUSG00000039545	-1.29572	0.175729	-0.24714	Flicr	Foxp3 regulating long intergenic noncoding RNA
1	ENSMUSG00000031328	-5.16712	2.60972	0.47409	Flna	filamin, alpha
1	ENSMUSG00000075415	-1.31239	1.3167	1.1442	Fnbp1	formin binding protein 1
1	ENSMUSG00000033837	-0.900406	0	-0.505076	Foxh1	forkhead box H1
1	ENSMUSG00000030067	-2.02124	-0.120993	-1.92813	Foxp1	forkhead box P1
1	ENSMUSG00000029563	-1.99858	0.343796	-0.194407	Foxp2	forkhead box P2
1	ENSMUSG00000070733	-1.6994	-0.0649277	-0.368499	Fryl	FRY like transcription coactivator
1	ENSMUSG00000001155	-1.73892	0	0.74523	Ftcd	formiminotransferase cyclodeaminase
1	ENSMUSG00000024661	-1.07851	0.210845	-0.698134	Fth1	ferritin heavy polypeptide 1
1	ENSMUSG00000091313	-2.02087	-0.261878	0.217805	Fth-ps2	ferritin heavy chain, pseudogene 2
1	ENSMUSG00000025040	-1.43711	1.7099	1.02253	Fundc1	FUN14 domain containing 1
1	ENSMUSG00000027680	-0.900406	0.871242	0.445648	Fxr1	FMR1 autosomal homolog 1
1	ENSMUSG00000034793	-1.04384	0.100455	0.118708	G6pc3	glucose 6 phosphatase, catalytic, 3
1	ENSMUSG00000031950	-2.57389	-2.16729	-1.04639	Gabarapl2	gamma-aminobutyric acid (GABA) A receptor-associated protein-like 2
1	ENSMUSG00000000420	-1.59227	0.914576	1.32057	Galnt1	polypeptide N-acetylgalactosaminyltransferase 1
1	ENSMUSG00000056061	-2.12765	0	0	Gata5os	GATA binding protein 5, opposite strand
1	ENSMUSG00000036180	-1.65944	1.27745	0.576375	Gatad2a	GATA zinc finger domain containing 2A
1	ENSMUSG00000023147	-0.900406	0.141522	0.387469	Get1	guided entry of tail-anchored proteins factor 1
1	ENSMUSG00000048000	-1.69251	1.13105	-0.299189	Gigyf2	GRB10 interacting GYF protein 2
1	ENSMUSG00000047867	-3.41637	2.80916	-0.121418	Gimap6	GTPase, IMAP family member 6
1	ENSMUSG00000041440	-0.900406	0.708392	0.179419	Gk5	glycerol kinase 5 (putative)
1	ENSMUSG00000028020	-1.5531	0	-0.0846438	Glrb	glycine receptor, beta subunit
1	ENSMUSG00000026103	-1.73461	0.192625	0.615915	Gls	glutaminase
1	ENSMUSG00000021916	-1.33861	0.271966	0.218941	Glt8d1	glycosyltransferase 8 domain containing 1
1	ENSMUSG00000058905	-2.0129	0.233438	1.18817	Gm10051	predicted pseudogene 10051
1	ENSMUSG00000058922	-1.09397	0	-0.123638	Gm10052	predicted pseudogene 10052
1	ENSMUSG00000094627	-0.872847	1.10895	0.559522	Gm10182	predicted pseudogene 10182
1	ENSMUSG00000067719	-1.06364	-0.914206	0.731793	Gm10221	predicted gene 10221
1	ENSMUSG00000067736	-2.26632	0.800248	-0.140756	Gm10222	predicted gene 10222
1	ENSMUSG00000074516	-1.04476	0.428488	0.203981	Gm10709	predicted gene 10709
1	ENSMUSG00000074564	-0.892849	0.937203	0.0656655	Gm10720	predicted gene 10720
1	ENSMUSG00000046341	-1.87865	0	-0.358528	Gm11223	predicted gene 11223
1	ENSMUSG00000081249	-1.71156	-0.290727	0.339623	Gm11517	predicted gene 11517
1	ENSMUSG00000082674	-2.08759	0	-0.096557	Gm11914	predicted gene 11914
1	ENSMUSG00000082292	-1.06745	0.113932	0.789009	Gm12250	predicted gene 12250
1	ENSMUSG00000066176	-0.900406	0	0.140527	Gm12511	predicted gene 12511
1	ENSMUSG00000080772	-1.35188	0.686284	-0.262176	Gm12543	predicted gene 12543
1	ENSMUSG00000082947	-0.859535	0	0	Gm12587	predicted gene 12587
1	ENSMUSG00000079962	-2.51408	0.71885	-0.317345	Gm12643	predicted gene 12643
1	ENSMUSG00000081405	-0.899071	0.0159167	-0.222316	Gm13142	predicted gene 13142
1	ENSMUSG00000083454	-2.05455	-0.512167	0.758342	Gm13226	predicted gene 13226
1	ENSMUSG00000082424	-0.788621	0.662017	-0.14378	Gm13292	predicted gene 13292
1	ENSMUSG00000084104	-1.2352	1.09023	0.338324	Gm13578	predicted gene 13578
1	ENSMUSG00000082460	-2.42182	0.18397	-0.433237	Gm13685	predicted gene 13685
1	ENSMUSG00000083833	-4.20637	1.41024	-0.0158361	Gm13841	predicted gene 13841
1	ENSMUSG00000084756	-1.23957	0.0810263	0	Gm13881	predicted gene 13881
1	ENSMUSG00000084164	-0.975677	0.0810263	0.276136	Gm13902	predicted gene 13902
1	ENSMUSG00000087040	-1.14519	-0.317814	-0.964061	Gm14033	predicted gene 14033
1	ENSMUSG00000082399	-3.88423	1.18535	-0.0472819	Gm14036	predicted gene 14036
1	ENSMUSG00000083483	-0.889264	0.778398	-0.479063	Gm14044	predicted gene 14044
1	ENSMUSG00000083953	-1.1343	0	-0.0906631	Gm14049	predicted gene 14049
1	ENSMUSG00000081434	-2.26219	-1.34177	-0.849463	Gm14165	predicted gene 14165
1	ENSMUSG00000061272	-0.939349	-0.743146	0.309056	Gm14173	predicted gene 14173
1	ENSMUSG00000081751	-0.943302	-0.707634	0.366966	Gm14251	predicted gene 14251
1	ENSMUSG00000081308	-0.972986	-0.50752	0.0457531	Gm14480	predicted gene 14480
1	ENSMUSG00000084830	-1.69954	-0.118351	0.236774	Gm14539	predicted gene 14539
1	ENSMUSG00000081673	-1.1733	-0.113327	1.23399	Gm14794	predicted gene 14794
1	ENSMUSG00000080887	-1.09633	0.0810263	0.85488	Gm14831	predicted gene 14831
1	ENSMUSG00000081331	-1.04717	0	0.163932	Gm15151	predicted gene 15151
1	ENSMUSG00000082693	-0.920891	0	0	Gm15190	predicted gene 15190
1	ENSMUSG00000081051	-1.27438	0.533547	0.679541	Gm15427	predicted pseudogene 15427
1	ENSMUSG00000096712	-2.63839	0.827101	-0.329604	Gm15454	predicted gene 15454
1	ENSMUSG00000083396	-1.46032	1.56814	0.144425	Gm15542	predicted gene 15542
1	ENSMUSG00000086013	-1.12981	0.475434	-0.605465	Gm15706	predicted gene 15706
1	ENSMUSG00000084111	-1.7144	1.68459	-1.73662	Gm15710	predicted gene 15710
1	ENSMUSG00000082120	-1.69778	-0.0128726	-0.378249	Gm15720	predicted gene 15720
1	ENSMUSG00000082277	-0.900406	0	0	Gm15807	predicted gene 15807
1	ENSMUSG00000089705	-0.934417	0.167975	0.153933	Gm15970	predicted gene 15970
1	ENSMUSG00000072576	-1.19868	-0.371374	0.774338	Gm16020	predicted gene 16020
1	ENSMUSG00000085284	-1.81413	0.0810263	0.848835	Gm16189	predicted gene 16189
1	ENSMUSG00000082107	-1.09397	0	0	Gm16216	predicted gene 16216
1	ENSMUSG00000085099	-1.75751	0.988843	-0.343704	Gm16288	predicted gene 16288
1	ENSMUSG00000085340	-1.04908	-0.0254809	0.270091	Gm16335	predicted gene 16335
1	ENSMUSG00000095991	-1.72224	-1.02146	-0.630256	Gm17048	predicted gene 17048
1	ENSMUSG00000099104	-1.16703	-0.716412	0.0891324	Gm17087	predicted gene 17087
1	ENSMUSG00000091514	-0.900406	0	-0.361608	Gm17484	predicted gene, 17484
1	ENSMUSG00000097183	-0.900406	0	-0.0168921	Gm17501	predicted gene, 17501
1	ENSMUSG00000093427	-0.900406	0	0	Gm18513	predicted gene, 18513
1	ENSMUSG00000078193	-1.87702	0.251272	-0.302381	Gm2000	predicted gene 2000
1	ENSMUSG00000093656	-2.42082	0.497344	-0.0341923	Gm20628	predicted gene 20628
1	ENSMUSG00000093577	-1.56276	-1.05527	1.2487	Gm20632	predicted gene 20632
1	ENSMUSG00000093553	-1.3123	-1.16393	1.2629	Gm20633	predicted gene 20633
1	ENSMUSG00000093594	-2.88108	0.953025	0.576642	Gm20707	predicted gene 20707
1	ENSMUSG00000090625	-1.78422	-0.854296	-0.385041	Gm20721	predicted gene, 20721
1	ENSMUSG00000096006	-1.66529	0.323745	-0.208451	Gm21596	predicted gene, 21596
1	ENSMUSG00000093112	-1.00011	-0.194354	0.413627	Gm22701	predicted gene, 22701
1	ENSMUSG00000093064	-0.922195	0.259986	0.0409486	Gm23153	predicted gene, 23153
1	ENSMUSG00000092702	-2.18836	0.294184	-0.14786	Gm24514	predicted gene, 24514
1	ENSMUSG00000093056	-1.29591	-0.194354	-0.160745	Gm24812	predicted gene, 24812
1	ENSMUSG00000092805	-1.76859	0.48822	-0.282249	Gm26461	predicted gene, 26461
1	ENSMUSG00000097700	-1.07949	0.846905	-0.843568	Gm26738	predicted gene, 26738
1	ENSMUSG00000097253	-1.09468	0	0.383269	Gm26770	predicted gene, 26770
1	ENSMUSG00000098041	-1.46858	0.367272	-0.096557	Gm26981	predicted gene, 26981
1	ENSMUSG00000060128	-1.16565	0.273713	-0.206649	Gm2710	predicted gene 2710
1	ENSMUSG00000099019	-0.899071	0	0.18222	Gm27254	predicted gene 27254
1	ENSMUSG00000085371	-0.886257	0	0	Gm3160	predicted pseudogene 3160
1	ENSMUSG00000094578	-1.31171	0	-1.40484	Gm3187	predicted gene 3187
1	ENSMUSG00000096520	-1.09397	0	0	Gm3376	predicted gene 3376
1	ENSMUSG00000096003	-0.884051	0.230014	0.064105	Gm3500	predicted gene 3500
1	ENSMUSG00000092624	-1.28377	0	-0.315627	Gm3654	predicted gene 3654
1	ENSMUSG00000078291	-1.06771	0.052951	-0.251105	Gm3940	predicted gene 3940
1	ENSMUSG00000091421	-1.43507	0.704354	-0.87555	Gm4202	predicted gene 4202
1	ENSMUSG00000089989	-1.3171	0.171095	-0.123638	Gm45713	predicted gene 45713
1	ENSMUSG00000064193	-3.55189	1.61768	-2.20739	Gm4735	predicted gene 4735
1	ENSMUSG00000087235	-1.70155	-0.549496	-0.152844	Gm4750	predicted gene 4750
1	ENSMUSG00000083089	-1.20878	0	-0.0661391	Gm4760	predicted gene 4760
1	ENSMUSG00000054412	-1.82153	0	-0.168825	Gm4793	predicted gene 4793
1	ENSMUSG00000063739	-2.94057	1.25376	-0.468341	Gm4963	predicted gene 4963
1	ENSMUSG00000062742	-1.51883	-0.789778	-0.208674	Gm5239	predicted pseudogene 5239
1	ENSMUSG00000068466	-1.09549	0.599782	0.11661	Gm5518	predicted gene 5518
1	ENSMUSG00000080021	-0.923683	0.132737	-0.0476528	Gm5915	predicted pseudogene 5915
1	ENSMUSG00000081205	-2.08509	-1.79469	-0.33098	Gm5940	predicted gene 5940
1	ENSMUSG00000074092	-1.86767	0.97815	0.1943	Gm6181	predicted pseudogene 6181
1	ENSMUSG00000094446	-1.32033	0.189816	0.408555	Gm6344	predicted gene 6344
1	ENSMUSG00000080775	-1.6717	0.131136	1.2516	Gm6368	predicted gene 6368
1	ENSMUSG00000081113	-1.95467	-0.465188	-1.05343	Gm7308	predicted pseudogene 7308
1	ENSMUSG00000059461	-2.02833	-0.494908	0.473399	Gm7331	predicted gene 7331
1	ENSMUSG00000039617	-0.992047	0.730187	-0.205497	Gm7488	predicted gene 7488
1	ENSMUSG00000057036	-2.11379	-0.898855	-1.12787	Gm7536	predicted gene 7536
1	ENSMUSG00000083505	-1.43143	1.17127	-1.30623	Gm7541	predicted gene 7541
1	ENSMUSG00000046636	-1.09397	0	0.277397	Gm7729	predicted gene 7729
1	ENSMUSG00000091460	-1.36473	0.953796	0.957361	Gm7808	predicted pseudogene 7808
1	ENSMUSG00000083261	-0.965902	0.189816	-0.330213	Gm7816	predicted pseudogene 7816
1	ENSMUSG00000094258	-1.32351	0	-0.0798673	Gm8159	predicted gene 8159
1	ENSMUSG00000082926	-1.18534	0.150687	-0.433089	Gm8172	predicted pseudogene 8172
1	ENSMUSG00000090119	-1.67587	0	-0.196373	Gm8185	predicted gene 8185
1	ENSMUSG00000094497	-3.20257	0.799346	0.329224	Gm8210	predicted pseudogene 8210
1	ENSMUSG00000095797	-1.32064	0.0810263	-1.29183	Gm8246	predicted gene 8246
1	ENSMUSG00000027694	-1.49783	0.295321	0.256949	Gm8325	predicted pseudogene 8325
1	ENSMUSG00000062458	-1.12212	1.19727	-0.605128	Gm8623	predicted gene 8623
1	ENSMUSG00000063696	-2.02841	-1.55248	-1.12685	Gm8730	predicted pseudogene 8730
1	ENSMUSG00000050299	-1.90123	-0.0827213	-0.239837	Gm9843	predicted gene 9843
1	ENSMUSG00000020611	-2.34643	-0.0576955	0.533035	Gna13	guanine nucleotide binding protein, alpha 13
1	ENSMUSG00000027523	-1.64405	-0.8573	-0.386809	Gnas	GNAS (guanine nucleotide binding protein, alpha stimulating) complex locus
1	ENSMUSG00000029064	-0.964946	1.12312	0.0303978	Gnb1	guanine nucleotide binding protein (G protein), beta 1
1	ENSMUSG00000036402	-1.15831	0.107786	-0.61017	Gng12	guanine nucleotide binding protein (G protein), gamma 12
1	ENSMUSG00000042354	-1.04677	0.321314	0.34779	Gnl3	guanine nucleotide binding protein-like 3 (nucleolar)
1	ENSMUSG00000054199	-1.87248	0.751384	-0.231034	Gon4l	gon-4-like (C.elegans)
1	ENSMUSG00000078810	-1.8817	-1.02042	0.783207	Gp6	glycoprotein 6 (platelet)
1	ENSMUSG00000000194	-3.55872	1.69265	-1.44954	Gpr107	G protein-coupled receptor 107
1	ENSMUSG00000026930	-1.46034	0	0.260682	Gpsm1	G-protein signalling modulator 1 (AGS3-like, C. elegans)
1	ENSMUSG00000010825	-0.900406	-0.194354	-0.240381	Grid2ip	glutamate receptor, ionotropic, delta 2 (Grid2) interacting protein 1
1	ENSMUSG00000062203	-1.90829	1.14756	-0.737477	Gspt1	G1 to S phase transition 1
1	ENSMUSG00000021149	-1.57722	-0.585512	-0.468489	Gtpbp4	GTP binding protein 4
1	ENSMUSG00000025534	-1.09397	-0.0294223	0.384473	Gusb	glucuronidase, beta
1	ENSMUSG00000051839	-1.37352	0.127842	0.987445	Gypa	glycophorin A
1	ENSMUSG00000069301	-1.28936	-0.339047	0.632832	H2ac11	H2A clustered histone 11
1	ENSMUSG00000094248	-1.55084	0.51404	-0.17446	H2ac23	H2A clustered histone 23
1	ENSMUSG00000094777	-1.4254	0.402439	-0.225023	H2ac24	H2A clustered histone 24
1	ENSMUSG00000050799	-5.40392	-1.51528	2.79656	H2bc1	H2B clustered histone 1
1	ENSMUSG00000069300	-3.65034	-0.937222	2.15971	H2bc11	H2B clustered histone 11
1	ENSMUSG00000062727	-1.49585	-0.782892	0.372316	H2bc12	H2B clustered histone 12
1	ENSMUSG00000095217	-1.03835	-0.999335	-0.20613	H2bc15	H2B clustered histone 15
1	ENSMUSG00000068854	-3.52043	0.259375	1.15203	H2bc21	H2B clustered histone 21
1	ENSMUSG00000069308	-2.83613	-1.0864	1.73103	H2bc22	H2B clustered histone 22
1	ENSMUSG00000075031	-3.36298	-0.545562	0.0122942	H2bc3	H2B clustered histone 3
1	ENSMUSG00000018102	-3.2107	-0.230286	1.74419	H2bc4	H2B clustered histone 4
1	ENSMUSG00000069268	-2.53419	0.330583	0.776873	H2bc7	H2B clustered histone 7
1	ENSMUSG00000058385	-3.61121	-1.53931	0.697124	H2bc8	H2B clustered histone 8
1	ENSMUSG00000060586	-1.91014	-0.187924	-0.990233	H2-Eb1	histocompatibility 2, class II antigen E beta
1	ENSMUSG00000069310	-1.56043	1.07877	0.516505	H3c3	H3 clustered histone 3
1	ENSMUSG00000016559	-2.63563	1.60829	-0.8232	H3f3b	H3.3 histone B
1	ENSMUSG00000004897	-3.55437	-0.192965	-0.357203	Hdgf	heparin binding growth factor
1	ENSMUSG00000042744	-0.891935	-0.548044	-0.117708	Hectd4	HECT domain E3 ubiquitin protein ligase 4
1	ENSMUSG00000044156	-1.60413	1.4422	-0.382483	Hepacam2	HEPACAM family member 2
1	ENSMUSG00000039307	-1.12027	-0.0954673	0.606397	Hexdc	hexosaminidase (glycosyl hydrolase family 20, catalytic domain) containing
1	ENSMUSG00000043372	-1.3714	1.44068	-0.197523	Hexim2	hexamethylene bis-acetamide inducible 2
1	ENSMUSG00000024986	-0.809769	0.511144	0.229921	Hhex	hematopoietically expressed homeobox
1	ENSMUSG00000032119	-1.00096	0.173692	0.144496	Hinfp	histone H4 transcription factor
1	ENSMUSG00000066551	-1.29787	-0.136066	-0.939505	Hmgb1	high mobility group box 1
1	ENSMUSG00000081455	-1.62841	0.588654	-0.558853	Hmgb1-ps3	high mobility group box 1, pseudogene 3
1	ENSMUSG00000084221	-1.47668	0.470414	-0.468244	Hmgb1-ps4	high mobility group box 1, pseudogene 4
1	ENSMUSG00000092281	-1.34165	-0.162335	-0.296441	Hmgb1-ps7	high-mobility group high mobility group box 1, pseudogene 7
1	ENSMUSG00000003038	-1.09499	1.19157	0.52929	Hmgn2	high mobility group nucleosomal binding domain 2
1	ENSMUSG00000070713	-0.971798	0.818576	0.711782	Hmgn2-ps	high mobility group nucleosomal binding domain 2, pseudogene
1	ENSMUSG00000031245	-1.68608	-0.194354	-0.24997	Hmgn5	high-mobility group nucleosome binding domain 5
1	ENSMUSG00000021927	-1.09397	0	0	Hnrnpa1l2-ps2	heterogeneous nuclear ribonucleoprotein A1-like 2, pseudogene 2
1	ENSMUSG00000003573	-1.7158	-1.27742	1.12559	Homer3	homer scaffolding protein 3
1	ENSMUSG00000038253	-1.35442	0	0.217931	Hoxa5	homeobox A5
1	ENSMUSG00000024507	-1.59637	0.208519	-1.11029	Hsd17b4	hydroxysteroid (17-beta) dehydrogenase 4
1	ENSMUSG00000053560	-1.66865	0.472981	-0.645842	Ier2	immediate early response 2
1	ENSMUSG00000078920	-1.84491	1.95354	0.889566	Ifi47	interferon gamma inducible protein 47
1	ENSMUSG00000001105	-0.907591	-0.158992	-0.2402	Ift20	intraflagellar transport 20
1	ENSMUSG00000007987	-1.54795	0	0.529894	Ift22	intraflagellar transport 22
1	ENSMUSG00000016637	-2.53093	-0.995849	-0.123643	Ift27	intraflagellar transport 27
1	ENSMUSG00000044244	-0.925252	0	0.130234	Il20rb	interleukin 20 receptor beta
1	ENSMUSG00000026985	-0.900406	0	0.47693	Il36b	interleukin 36B
1	ENSMUSG00000026309	-1.9205	1.60927	-0.784122	Ilkap	integrin-linked kinase-associated serine/threonine phosphatase 2C
1	ENSMUSG00000037679	-1.11792	0.168267	0.487185	Inf2	inverted formin, FH2 and WH2 domain containing
1	ENSMUSG00000006127	-1.24876	0.668601	0.721257	Inpp5k	inositol polyphosphate 5-phosphatase K
1	ENSMUSG00000021676	-1.17032	0.448415	1.07724	Iqgap2	IQ motif containing GTPase activating protein 2
1	ENSMUSG00000030830	-2.05112	-0.730086	-0.83996	Itgal	integrin alpha L
1	ENSMUSG00000020689	-1.62397	0.541996	1.56398	Itgb3	integrin beta 3
1	ENSMUSG00000031239	-0.992047	-0.446909	0.603183	Itm2a	integral membrane protein 2A
1	ENSMUSG00000028530	-1.76741	-0.960793	1.36525	Jak1	Janus kinase 1
1	ENSMUSG00000022426	-1.17123	-0.273594	-0.216218	Josd1	Josephin domain containing 1
1	ENSMUSG00000059486	-2.0371	0.380412	-0.390696	Kbtbd2	kelch repeat and BTB (POZ) domain containing 2
1	ENSMUSG00000036225	-3.45793	1.69877	1.38214	Kctd1	potassium channel tetramerisation domain containing 1
1	ENSMUSG00000003308	-1.28605	0.596507	-0.600895	Keap1	kelch-like ECH-associated protein 1
1	ENSMUSG00000028790	-1.94987	0.666292	1.1063	Khdrbs1	KH domain containing, RNA binding, signal transduction associated 1
1	ENSMUSG00000021288	-1.31617	1.29788	-0.239331	Klc1	kinesin light chain 1
1	ENSMUSG00000038056	-1.6841	0.650228	0.244055	Kmt2c	lysine (K)-specific methyltransferase 2C
1	ENSMUSG00000003731	-1.98974	0.804619	-1.93007	Kpna6	karyopherin (importin) alpha 6
1	ENSMUSG00000087260	-1.55636	0.173692	0.628916	Lamtor5	late endosomal/lysosomal adaptor, MAPK and MTOR activator 5
1	ENSMUSG00000023025	-1.27474	1.22448	0.547389	Larp4	La ribonucleoprotein 4
1	ENSMUSG00000000409	-1.01177	-0.228214	-0.72938	Lck	lymphocyte protein tyrosine kinase
1	ENSMUSG00000054469	-1.07949	0	-0.123638	Lclat1	lysocardiolipin acyltransferase 1
1	ENSMUSG00000025019	-1.1857	0	-0.157448	Lcor	ligand dependent nuclear receptor corepressor
1	ENSMUSG00000030246	-1.16181	0.175729	-0.158043	Ldhb	lactate dehydrogenase B
1	ENSMUSG00000019920	-2.22207	1.29338	-1.45004	Lims1	LIM and senescent cell antigen-like domains 1
1	ENSMUSG00000022500	-1.36656	-0.958278	0.546606	Litaf	LPS-induced TN factor
1	ENSMUSG00000028063	-2.43645	0.189211	-0.43025	Lmna	lamin A
1	ENSMUSG00000030226	-0.884977	0.141522	-0.326503	Lmo3	LIM domain only 3
1	ENSMUSG00000024052	-1.97373	-0.657168	0.931349	Lpin2	lipin 2
1	ENSMUSG00000033306	-1.16115	0.813612	-0.511012	Lpp	LIM domain containing preferred translocation partner in lipoma
1	ENSMUSG00000007476	-1.14045	0.908496	-0.63236	Lrrc8a	leucine rich repeat containing 8A VRAC subunit A
1	ENSMUSG00000084878	-1.43209	0.175729	-0.169975	Lrrc8dos	leucine rich repeat containing 8D, opposite strand
1	ENSMUSG00000037296	-1.35866	-0.916818	-0.599847	Lsm1	LSM1 homolog, mRNA degradation associated
1	ENSMUSG00000001870	-2.86557	0.482922	-0.00062461	Ltbp1	latent transforming growth factor beta binding protein 1
1	ENSMUSG00000031072	-1.52288	0.264445	-0.669994	LTO1	ABCE maturation factor
1	ENSMUSG00000067367	-1.18965	0	0.272937	Lyar	Ly1 antibody reactive clone
1	ENSMUSG00000068205	-1.19014	-0.956528	0.0401031	Macrod2	mono-ADP ribosylhydrolase 2
1	ENSMUSG00000029003	-1.76069	0.139073	-0.888471	Mad2l2	MAD2 mitotic arrest deficient-like 2
1	ENSMUSG00000092341	-3.50664	0.0383544	-2.68339	Malat1	metastasis associated lung adenocarcinoma transcript 1 (non-coding RNA)
1	ENSMUSG00000038886	-1.0339	0.498136	0.047108	Man2a2	mannosidase 2, alpha 2
1	ENSMUSG00000027602	-1.61646	-0.169038	0.487081	Map1lc3a	microtubule-associated protein 1 light chain 3 alpha
1	ENSMUSG00000031812	-1.89518	-1.07904	0.0750045	Map1lc3b	microtubule-associated protein 1 light chain 3 beta
1	ENSMUSG00000019261	-2.10568	-0.131019	0.0857762	Map1s	microtubule-associated protein 1S
1	ENSMUSG00000023050	-1.54929	0.542008	-1.43668	Map3k12	mitogen-activated protein kinase kinase kinase 12
1	ENSMUSG00000028849	-0.884051	1.01908	-0.150554	Map7d1	MAP7 domain containing 1
1	ENSMUSG00000063358	-1.13323	0.976162	-0.836325	Mapk1	mitogen-activated protein kinase 1
1	ENSMUSG00000021840	-1.47282	0	-0.632739	Mapk1ip1l	mitogen-activated protein kinase 1 interacting protein 1-like
1	ENSMUSG00000025702	-2.83024	0.732829	0.853426	Marchf8	membrane associated ring-CH-type finger 8
1	ENSMUSG00000028979	-1.30584	-0.715055	0.565733	Masp2	mannan-binding lectin serine peptidase 2
1	ENSMUSG00000003810	-1.39015	-0.745282	0.4875	Mast2	microtubule associated serine/threonine kinase 2
1	ENSMUSG00000000355	-2.10507	0	-0.778479	Mcts1	malignant T cell amplified sequence 1
1	ENSMUSG00000019179	-1.61171	1.59331	-0.467993	Mdh2	malate dehydrogenase 2, NAD (mitochondrial)
1	ENSMUSG00000081677	-1.52284	0	0	Mdk-ps1	midkine pseudogene 1
1	ENSMUSG00000002768	-1.3503	-0.220793	0.418278	Mea1	male enhanced antigen 1
1	ENSMUSG00000019984	-1.64084	-1.39373	-1.16448	Med23	mediator complex subunit 23
1	ENSMUSG00000005583	-1.74299	0.137868	0.168027	Mef2c	myocyte enhancer factor 2C
1	ENSMUSG00000037253	-2.59543	-1.05206	-0.0865224	Mex3c	mex3 RNA binding family member C
1	ENSMUSG00000037336	-2.41303	-1.03182	-0.361584	Mfsd2b	MFSD2 lysolipid transporter B, sphingolipid
1	ENSMUSG00000020346	-1.20865	0.677414	0.929723	Mgat1	mannoside acetylglucosaminyltransferase 1
1	ENSMUSG00000022517	-2.66352	0.89293	1.30101	Mgrn1	mahogunin, ring finger 1
1	ENSMUSG00000020111	-1.32359	0.739867	0.136377	Micu1	mitochondrial calcium uptake 1
1	ENSMUSG00000026743	-0.950045	-0.100471	-0.00652489	Mllt10	myeloid/lymphoid or mixed-lineage leukemia; translocated to, 10
1	ENSMUSG00000074813	-2.82572	-1.15433	-0.549895	Morrbid	myeloid RNA regulator of BCL2L11 induced cell death
1	ENSMUSG00000026568	-2.82934	1.39862	0.912533	Mpc2	mitochondrial pyruvate carrier 2
1	ENSMUSG00000038126	-1.95733	0.819432	0.541765	Mphosph9	M-phase phosphoprotein 9
1	ENSMUSG00000001445	-1.04944	-0.0664247	0.573016	Mrpl10	mitochondrial ribosomal protein L10
1	ENSMUSG00000029066	-1.23607	-0.25114	0.539454	Mrpl20	mitochondrial ribosomal protein L20
1	ENSMUSG00000020514	-1.527	0.0571364	0.0297984	Mrpl22	mitochondrial ribosomal protein L22
1	ENSMUSG00000024181	-2.03648	0.147584	0.0423073	Mrpl28	mitochondrial ribosomal protein L28
1	ENSMUSG00000021967	-1.9044	1.62888	-0.033714	Mrpl57	mitochondrial ribosomal protein L57
1	ENSMUSG00000054312	-2.49159	0.647698	0.113095	Mrps21	mitochondrial ribosomal protein S21
1	ENSMUSG00000024677	-3.56285	2.54434	0.313912	Ms4a6b	membrane-spanning 4-domains, subfamily A, member 6B
1	ENSMUSG00000031604	-1.18947	0.225625	-0.125318	Msmo1	methylsterol monoxygenase 1
1	ENSMUSG00000075705	-1.55778	-1.12043	-0.176905	Msrb1	methionine sulfoxide reductase B1
1	ENSMUSG00000021519	-2.70266	-0.650215	-1.62149	Mterf3	mitochondrial transcription termination factor 3
1	ENSMUSG00000005667	-1.11753	-0.85058	-0.908952	Mthfd2	methylenetetrahydrofolate dehydrogenase (NAD+ dependent), methenyltetrahydrofolate cyclohydrolase
1	ENSMUSG00000031337	-0.900406	0.245878	-0.487025	Mtm1	X-linked myotubular myopathy gene 1
1	ENSMUSG00000065947	-1.22999	0.670411	-0.108497	mt-Nd4l	mitochondrially encoded NADH dehydrogenase 4L
1	ENSMUSG00000064343	-1.459	-1.15317	-0.109265	mt-Tq	mitochondrially encoded tRNA glutamine
1	ENSMUSG00000064365	-1.24011	0.303014	-0.69557	mt-Ts2	mitochondrially encoded tRNA serine 2
1	ENSMUSG00000044597	-0.900406	-0.317814	0	Mycs	myc-like oncogene, s-myc protein
1	ENSMUSG00000030672	-1.16652	0.321314	-0.0704918	Mylpf	myosin light chain, phosphorylatable, fast skeletal muscle
1	ENSMUSG00000002881	-2.31012	0.156224	1.95525	Nab1	Ngfi-A binding protein 1
1	ENSMUSG00000061315	-1.74828	-0.758612	-0.462526	Naca	nascent polypeptide-associated complex alpha polypeptide
1	ENSMUSG00000009418	-0.952845	0.0427924	-0.00475487	Nav1	neuron navigator 1
1	ENSMUSG00000056724	-0.940419	0.521099	-0.336777	Nbeal2	neurobeachin-like 2
1	ENSMUSG00000053253	-2.25277	1.16686	-0.531162	Ndfip2	Nedd4 family interacting protein 2
1	ENSMUSG00000026260	-1.22224	0.256755	-0.403789	Ndufa10	NADH:ubiquinone oxidoreductase subunit A10
1	ENSMUSG00000035674	-1.14227	0	0.355442	Ndufa3	NADH:ubiquinone oxidoreductase subunit A3
1	ENSMUSG00000022820	-1.09709	0	0.0657257	Ndufb4	NADH:ubiquinone oxidoreductase subunit B4
1	ENSMUSG00000083380	-1.54493	0	-0.24997	Ndufb4c	NADH:ubiquinone oxidoreductase subunit B4C
1	ENSMUSG00000033938	-1.29069	0.367148	0.257603	Ndufb7	NADH:ubiquinone oxidoreductase subunit B7
1	ENSMUSG00000025968	-1.81237	-0.724637	0.11768	Ndufs1	NADH:ubiquinone oxidoreductase core subunit S1
1	ENSMUSG00000010376	-2.88539	-2.82273	1.00827	Nedd8	neural precursor cell expressed, developmentally down-regulated gene 8
1	ENSMUSG00000013465	-2.08104	0.708493	-0.236827	Nelfb	negative elongation factor complex member B
1	ENSMUSG00000016253	-2.2812	1.85906	0.0980269	Nelfcd	negative elongation factor complex member C/D, Th1l
1	ENSMUSG00000006435	-1.4551	0	-0.820081	Neurl1a	neuralized E3 ubiquitin protein ligase 1A
1	ENSMUSG00000004612	-0.96518	-0.242555	0.20182	Nkg7	natural killer cell group 7 sequence
1	ENSMUSG00000017376	-2.36211	2.08519	0.0410811	Nlk	nemo like kinase
1	ENSMUSG00000063445	-1.06273	0.141522	1.02662	Nmral1	NmrA-like family domain containing 1
1	ENSMUSG00000063200	-2.24875	0.573184	0.683163	Nol7	nucleolar protein 7
1	ENSMUSG00000028948	-1.12198	0	1.0911	Nol9	nucleolar protein 9
1	ENSMUSG00000027878	-1.00952	-0.0576508	-0.188857	Notch2	notch 2
1	ENSMUSG00000021242	-1.22796	-0.669698	0.821319	Npc2	NPC intracellular cholesterol transporter 2
1	ENSMUSG00000064548	-0.900406	-0.390736	-0.096557	n-R5s65	nuclear encoded rRNA 5S 65
1	ENSMUSG00000029148	-1.393	0.0810263	-0.438562	Nrbp1	nuclear receptor binding protein 1
1	ENSMUSG00000053310	-1.10451	-0.811711	0.206627	Nrgn	neurogranin
1	ENSMUSG00000025969	-1.00092	0	0.191539	Nrp2	neuropilin 2
1	ENSMUSG00000031754	-1.05228	0.454017	-0.223864	Nudt21	nudix hydrolase 21
1	ENSMUSG00000024213	-0.901268	0.66356	-0.303332	Nudt3	nudix hydrolase 3
1	ENSMUSG00000029605	-0.96018	0.468258	-0.0558454	Oas1b	2'-5' oligoadenylate synthetase 1B
1	ENSMUSG00000040652	-1.34208	0.874927	0.379138	Oaz2	ornithine decarboxylase antizyme 2
1	ENSMUSG00000050128	-1.12643	0	0	Or5m10	olfactory receptor family 5 subfamily M member 10
1	ENSMUSG00000038803	-2.40921	-1.37248	1.13588	Ost4	oligosaccharyltransferase complex subunit 4 (non-catalytic)
1	ENSMUSG00000041084	-1.12926	-0.187079	-0.903428	Ostc	oligosaccharyltransferase complex subunit (non-catalytic)
1	ENSMUSG00000038280	-1.02738	0.360227	-0.384331	Ostm1	osteopetrosis associated transmembrane protein 1
1	ENSMUSG00000031154	-1.55145	0.325089	0.255103	Otud5	OTU domain containing 5
1	ENSMUSG00000038495	-2.51229	1.29677	1.10455	Otud7b	OTU domain containing 7B
1	ENSMUSG00000046034	-3.10149	1.65007	-0.0612323	Otulin	OTU deubiquitinase with linear linkage specificity
1	ENSMUSG00000021906	-2.59557	-0.844326	-0.0851379	Oxnad1	oxidoreductase NAD-binding domain containing 1
1	ENSMUSG00000020787	-1.70508	-0.111452	-0.674176	P2rx1	purinergic receptor P2X, ligand-gated ion channel, 1
1	ENSMUSG00000027765	-2.20512	-0.921846	-0.960279	P2ry1	purinergic receptor P2Y, G-protein coupled 1
1	ENSMUSG00000029247	-1.08893	-0.128205	0.497309	Paics	phosphoribosylaminoimidazole carboxylase, phosphoribosylaminoribosylaminoimidazole, succinocarboxamide synthetase
1	ENSMUSG00000058056	-2.03261	0.75663	1.24461	Palld	palladin, cytoskeletal associated protein
1	ENSMUSG00000021112	-1.9887	2.35597	-1.40342	Pals1	protein associated with LIN7 1, MAGUK family member
1	ENSMUSG00000022438	-3.73201	-0.205934	-2.3881	Parvb	parvin, beta
1	ENSMUSG00000042323	-2.16683	-0.56527	0.07514	Pbrm1	polybromo 1
1	ENSMUSG00000039849	-3.09595	0.473651	0.317373	Pcif1	phosphorylated CTD interacting factor 1
1	ENSMUSG00000027589	-1.114	0.470855	0.377983	Pcmtd2	protein-L-isoaspartate (D-aspartate) O-methyltransferase domain containing 2
1	ENSMUSG00000001151	-2.84995	-0.143065	1.49462	Pcnt	pericentrin (kendrin)
1	ENSMUSG00000020717	-2.08141	1.71033	1.26556	Pecam1	platelet/endothelial cell adhesion molecule 1
1	ENSMUSG00000020134	-1.7103	0.570502	0.393715	Peli1	pellino 1
1	ENSMUSG00000039611	-2.59457	-0.669589	-0.376325	Pgap4	post-GPI attachment to proteins GalNAc transferase 4
1	ENSMUSG00000018572	-1.09397	0.597398	0.605283	Phf23	PHD finger protein 23
1	ENSMUSG00000031802	-1.9523	1.4248	-0.541981	Phxr4	per-hexamer repeat gene 4
1	ENSMUSG00000029186	-0.90833	0.111302	0.395661	Pi4k2b	phosphatidylinositol 4-kinase type 2 beta
1	ENSMUSG00000032405	-1.0905	0.302933	1.00982	Pias1	protein inhibitor of activated STAT 1
1	ENSMUSG00000026447	-1.55728	0.615428	1.36198	Pik3c2b	phosphatidylinositol-4-phosphate 3-kinase catalytic subunit type 2 beta
1	ENSMUSG00000041417	-1.92177	0.327475	-0.27454	Pik3r1	phosphoinositide-3-kinase regulatory subunit 1
1	ENSMUSG00000026737	-1.3732	0.635121	0.187134	Pip4k2a	phosphatidylinositol-5-phosphate 4-kinase, type II, alpha
1	ENSMUSG00000034462	-1.01324	-0.235356	-0.634592	Pkd2	polycystin 2, transient receptor potential cation channel
1	ENSMUSG00000014503	-3.31252	-2.1475	-2.96717	Pkd2l2	polycystic kidney disease 2-like 2
1	ENSMUSG00000097076	-0.900406	0	-0.393662	Platr7	pluripotency associated transcript 7
1	ENSMUSG00000083907	-0.900406	0	0.166673	Plk-ps1	polo like kinase, pseudogene 1
1	ENSMUSG00000063446	-1.22817	0	1.13918	Plppr1	phospholipid phosphatase related 1
1	ENSMUSG00000025359	-1.4783	0	0.55252	Pmel	premelanosome protein
1	ENSMUSG00000034126	-0.900406	0.141522	0.456169	Pomt2	protein-O-mannosyltransferase 2
1	ENSMUSG00000020089	-1.66116	0.364899	-0.196373	Ppa1	pyrophosphatase (inorganic) 1
1	ENSMUSG00000021096	-3.4045	1.57565	0.843767	Ppm1a	protein phosphatase 1A, magnesium dependent, alpha isoform
1	ENSMUSG00000036398	-0.950917	-0.167574	0.55897	Ppp1r11	protein phosphatase 1, regulatory inhibitor subunit 11
1	ENSMUSG00000047714	-1.13556	-0.768831	0.240994	Ppp1r2	protein phosphatase 1, regulatory inhibitor subunit 2
1	ENSMUSG00000026275	-1.63949	-0.206333	-0.764131	Ppp1r7	protein phosphatase 1, regulatory subunit 7
1	ENSMUSG00000009630	-1.00196	0.870551	-0.366353	Ppp2cb	protein phosphatase 2 (formerly 2A), catalytic subunit, beta isoform
1	ENSMUSG00000059409	-1.39077	-0.220793	0.5064	Ppp2r5d	protein phosphatase 2, regulatory subunit B', delta
1	ENSMUSG00000021051	-1.72914	1.89122	-0.281976	Ppp2r5e	protein phosphatase 2, regulatory subunit B', epsilon
1	ENSMUSG00000028657	-1.91395	0.421362	0.632203	Ppt1	palmitoyl-protein thioesterase 1
1	ENSMUSG00000024953	-1.04298	0.503739	0.589447	Prdx5	peroxiredoxin 5
1	ENSMUSG00000026134	-1.38036	0.358843	-0.0221792	Prim2	DNA primase, p58 subunit
1	ENSMUSG00000050965	-1.78693	0.505848	0.198087	Prkca	protein kinase C, alpha
1	ENSMUSG00000022912	-2.35803	0.356611	0.860281	Pros1	protein S (alpha)
1	ENSMUSG00000028837	-0.974723	0.189816	0.661441	Psmb2	proteasome (prosome, macropain) subunit, beta type 2
1	ENSMUSG00000021832	-1.21348	0.365452	-0.808948	Psmc6	proteasome (prosome, macropain) 26S subunit, ATPase, 6
1	ENSMUSG00000025487	-1.79852	-0.360031	0.347497	Psmd13	proteasome (prosome, macropain) 26S subunit, non-ATPase, 13
1	ENSMUSG00000071451	-0.9056	0.34539	-0.0734347	Psmg4	proteasome (prosome, macropain) assembly chaperone 4
1	ENSMUSG00000021518	-1.87214	-0.175099	-0.458637	Ptdss1	phosphatidylserine synthase 1
1	ENSMUSG00000013663	-1.3205	-0.0269561	-0.131361	Pten	phosphatase and tensin homolog
1	ENSMUSG00000072946	-1.2406	0.534256	-0.342797	Ptgr2	prostaglandin reductase 2
1	ENSMUSG00000097754	-0.900406	0	0.277397	Ptgs2os2	prostaglandin-endoperoxide synthase 2, opposite strand 2
1	ENSMUSG00000059456	-3.63516	-3.32884	-0.741133	Ptk2b	PTK2 protein tyrosine kinase 2 beta
1	ENSMUSG00000025314	-3.62883	0.170836	0.470942	Ptprj	protein tyrosine phosphatase receptor type J
1	ENSMUSG00000033059	-4.09621	1.19406	-0.528749	Pygb	brain glycogen phosphorylase
1	ENSMUSG00000062078	-2.59667	-1.29307	0.863469	Qki	quaking, KH domain containing RNA binding
1	ENSMUSG00000026878	-1.12002	0.572536	-0.727811	Rab14	RAB14, member RAS oncogene family
1	ENSMUSG00000020732	-1.43224	0.100203	1.10766	Rab37	RAB37, member RAS oncogene family
1	ENSMUSG00000019173	-1.7767	1.21025	0.555144	Rab5c	RAB5C, member RAS oncogene family
1	ENSMUSG00000030704	-1.54607	-0.115281	-0.0780666	Rab6a	RAB6A, member RAS oncogene family
1	ENSMUSG00000032549	-1.85972	0.647447	-0.197596	Rab6b	RAB6B, member RAS oncogene family
1	ENSMUSG00000036943	-1.74477	0.0410631	-0.8037	Rab8b	RAB8B, member RAS oncogene family
1	ENSMUSG00000003380	-1.03504	0.444583	-0.0302477	Rabac1	Rab acceptor 1 (prenylated)
1	ENSMUSG00000001847	-1.24131	-0.220285	-0.0213977	Rac1	Rac family small GTPase 1
1	ENSMUSG00000022314	-2.14083	1.43674	-2.21529	Rad21	RAD21 cohesin complex component
1	ENSMUSG00000074909	-1.89349	-0.194354	1.25297	Ranbp6	RAN binding protein 6
1	ENSMUSG00000051615	-2.37834	-1.12413	-0.554619	Rap2a	RAS related protein 2a
1	ENSMUSG00000021549	-1.70656	-1.58647	-0.0229026	Rasa1	RAS p21 protein activator 1
1	ENSMUSG00000032946	-1.1047	0.449523	0.014122	Rasgrp2	RAS, guanyl releasing protein 2
1	ENSMUSG00000034209	-1.32274	1.09404	-0.229853	Rasl10a	RAS-like, family 10, member A
1	ENSMUSG00000022105	-1.57448	0.00581157	-0.464642	Rb1	RB transcriptional corepressor 1
1	ENSMUSG00000057236	-1.26709	0.542568	-0.132037	Rbbp4	retinoblastoma binding protein 4, chromatin remodeling factor
1	ENSMUSG00000030779	-1.66351	0.975963	-0.198301	Rbbp6	retinoblastoma binding protein 6, ubiquitin ligase
1	ENSMUSG00000089824	-1.15496	-0.317814	0.883794	Rbm12	RNA binding motif protein 12
1	ENSMUSG00000026889	-2.51726	-1.4688	-0.200928	Rbm18	RNA binding motif protein 18
1	ENSMUSG00000024491	-0.85342	0.141522	0.181007	Rbm27	RNA binding motif protein 27
1	ENSMUSG00000032387	-1.63584	-0.1045	0.550982	Rbpms2	RNA binding protein with multiple splicing 2
1	ENSMUSG00000022951	-1.73098	0.401328	-1.03397	Rcan1	regulator of calcineurin 1
1	ENSMUSG00000039601	-0.872847	-0.0576508	0.166673	Rcan2	regulator of calcineurin 2
1	ENSMUSG00000022106	-0.829186	0.601167	0.336543	Rcbtb2	regulator of chromosome condensation (RCC1) and BTB (POZ) domain containing protein 2
1	ENSMUSG00000056666	-1.0348	0.0810263	-0.200227	Retsat	retinol saturase (all trans retinol 13,14 reductase)
1	ENSMUSG00000037674	-1.74012	-0.409623	-0.514575	Rfx7	regulatory factor X, 7
1	ENSMUSG00000030844	-1.494	0.369816	1.00177	Rgs10	regulator of G-protein signalling 10
1	ENSMUSG00000028945	-0.939791	-0.377149	-0.238954	Rheb	Ras homolog enriched in brain
1	ENSMUSG00000048668	-1.09468	0	0.407291	Rhno1	RAD9-HUS1-RAD1 interacting nuclear orphan 1
1	ENSMUSG00000029449	-1.79267	0.348887	-0.746263	Rhof	ras homolog family member F (in filopodia)
1	ENSMUSG00000079639	-1.39563	0	-0.231384	Rhox4a	reproductive homeobox 4A
1	ENSMUSG00000079635	-1.67557	0	0.0594275	Rhox4c	reproductive homeobox 4C
1	ENSMUSG00000071770	-1.10397	0	-0.632156	Rhox4e	reproductive homeobox 4E
1	ENSMUSG00000079630	-1.46441	0	-0.768306	Rhox4f	reproductive homeobox 4F
1	ENSMUSG00000079628	-1.15064	0	-0.741952	Rhox4g	reproductive homeobox 4G
1	ENSMUSG00000022323	-1.53738	-1.31108	1.04413	Rida	reactive intermediate imine deaminase A homolog
1	ENSMUSG00000092746	-2.38612	0.915757	0.403652	Rn7s6	7S RNA 6
1	ENSMUSG00000060450	-3.66492	-1.70948	-0.637509	Rnf14	ring finger protein 14
1	ENSMUSG00000038068	-1.76662	1.3037	1.92074	Rnf144b	ring finger protein 144B
1	ENSMUSG00000020496	-1.84591	0.423378	-0.938694	Rnf187	ring finger protein 187
1	ENSMUSG00000022280	-1.08838	0.264445	0.821312	Rnf19a	ring finger protein 19A
1	ENSMUSG00000033967	-0.884051	0	0.0168895	Rnf225	ring finger protein 225
1	ENSMUSG00000032125	-2.12318	0.288391	-0.0906631	Robo4	roundabout guidance receptor 4
1	ENSMUSG00000018449	-0.920891	0.475434	0.136521	Rpain	RPA interacting protein
1	ENSMUSG00000059291	-1.3021	0.401328	-0.936034	Rpl11	ribosomal protein L11
1	ENSMUSG00000000740	-1.5842	1.76262	-1.63586	Rpl13	ribosomal protein L13
1	ENSMUSG00000059835	-1.07172	0.788724	-1.092	Rpl13-ps3	ribosomal protein L13, pseudogene 3
1	ENSMUSG00000045128	-1.31222	1.05529	1.21432	Rpl18a	ribosomal protein L18A
1	ENSMUSG00000059033	-0.997659	0.558996	0.176086	Rpl18a-ps1	ribosomal protein L18A, pseudogene 1
1	ENSMUSG00000081382	-0.982661	0.631343	0.568658	Rpl18-ps1	ribosomal protein L18, pseudogene 1
1	ENSMUSG00000046364	-1.85104	-0.0436159	-0.229671	Rpl27a	ribosomal protein L27A
1	ENSMUSG00000030432	-2.09916	-0.433118	1.56284	Rpl28	ribosomal protein L28
1	ENSMUSG00000058603	-3.20495	-0.288859	1.98181	Rpl28-ps1	ribosomal protein L28, pseudogene 1
1	ENSMUSG00000079942	-1.93386	0.252121	1.12381	Rpl28-ps3	ribosomal protein L28, pseudogene 3
1	ENSMUSG00000048758	-0.928756	0.286966	-0.169502	Rpl29	ribosomal protein L29
1	ENSMUSG00000062896	-1.64095	1.74446	-0.666474	Rpl31-ps11	ribosomal protein L31, pseudogene 11
1	ENSMUSG00000062997	-1.46494	0.486248	0.429791	Rpl35	ribosomal protein L35
1	ENSMUSG00000079435	-1.3044	1.55618	-0.689951	Rpl36a	ribosomal protein L36A
1	ENSMUSG00000003429	-1.98768	-0.527614	-0.784106	Rps11	ribosomal protein S11
1	ENSMUSG00000081929	-1.05298	-0.0482611	-0.222605	Rps11-ps2	ribosomal protein S11, pseudogene 2
1	ENSMUSG00000081715	-0.798837	0.307527	-0.169992	Rps11-ps3	ribosomal protein S11, pseudogene 3
1	ENSMUSG00000046620	-0.821392	0.507697	-0.170236	Rps11-ps4	ribosomal protein S11, pseudogene 4
1	ENSMUSG00000060419	-1.41395	1.3865	-0.355686	Rps16-ps2	ribosomal protein S16, pseudogene 2
1	ENSMUSG00000096942	-1.82987	-1.26586	0.835685	Rps19-ps6	ribosomal protein S19, pseudogene 6
1	ENSMUSG00000080006	-1.48776	-0.282925	-0.468234	Rps19-ps7	ribosomal protein S19, pseudogene 7
1	ENSMUSG00000039001	-1.38271	0.760806	-1.31237	Rps21	ribosomal protein S21
1	ENSMUSG00000009927	-1.77207	0.395037	-0.577294	Rps25	ribosomal protein S25
1	ENSMUSG00000090733	-1.05119	1.10704	-0.622618	Rps27	ribosomal protein S27
1	ENSMUSG00000067288	-1.46939	1.51798	1.41071	Rps28	ribosomal protein S28
1	ENSMUSG00000061477	-2.17431	1.48309	-0.0375181	Rps7	ribosomal protein S7
1	ENSMUSG00000095597	-1.72513	1.61713	0.0136613	Rps7-ps3	ribosomal protein S7, pseudogene 3
1	ENSMUSG00000006333	-2.51513	0.0257912	0.474218	Rps9	ribosomal protein S9
1	ENSMUSG00000082895	-0.900406	-0.469304	0.0648866	Rpsa-ps9	ribosomal protein SA, pseudogene 9
1	ENSMUSG00000067924	-1.09679	1.13313	-0.461791	Rtl8b	retrotransposon Gag like 8B
1	ENSMUSG00000024758	-0.950915	-0.10834	-0.346191	Rtn3	reticulon 3
1	ENSMUSG00000019864	-1.66586	-0.695573	-0.36615	Rtn4ip1	reticulon 4 interacting protein 1
1	ENSMUSG00000035969	-1.01788	-0.789851	0.480625	Rusc2	RUN and SH3 domain containing 2
1	ENSMUSG00000042312	-0.978863	0.804124	0.485556	S100a13	S100 calcium binding protein A13
1	ENSMUSG00000044199	-1.92549	0.337002	-0.197931	S1pr4	sphingosine-1-phosphate receptor 4
1	ENSMUSG00000047181	-4.21272	-2.82162	-2.1642	Samd14	sterile alpha motif domain containing 14
1	ENSMUSG00000031532	-2.96534	1.60308	0.140383	Saraf	store-operated calcium entry-associated regulatory factor
1	ENSMUSG00000033228	-0.900406	1.06677	0.357116	Scaf11	SR-related CTD-associated factor 11
1	ENSMUSG00000040188	-2.58642	-0.92191	0.0971573	Scamp2	secretory carrier membrane protein 2
1	ENSMUSG00000008226	-1.37578	-0.107157	-0.0677683	Scrn3	secernin 3
1	ENSMUSG00000028249	-1.54109	-0.0952198	0.359595	Sdcbp	syndecan binding protein
1	ENSMUSG00000027879	-1.05415	-0.750313	0.339	Sec22b	SEC22 homolog B, vesicle trafficking protein
1	ENSMUSG00000039367	-0.867692	0.291171	0.242493	Sec24c	SEC24 homolog C, COPII coat complex component
1	ENSMUSG00000085415	-1.57909	0.519142	-0.906119	Selenok-ps1	selenoprotein K, pseudogene 1
1	ENSMUSG00000033075	-1.50559	-0.326752	-0.890309	Senp1	SUMO1/sentrin specific peptidase 1
1	ENSMUSG00000036371	-3.23926	-0.108074	-0.963021	Serbp1	serpine1 mRNA binding protein 1
1	ENSMUSG00000038332	-1.71007	0.417692	-1.70237	Sesn1	sestrin 1
1	ENSMUSG00000015697	-1.24153	0.965004	0.00927167	Setdb1	SET domain, bifurcated 1
1	ENSMUSG00000024853	-2.23341	0.425813	0.466854	Sf3b2	splicing factor 3b, subunit 2
1	ENSMUSG00000021474	-1.67136	-1.29107	-0.217629	Sfxn1	sideroflexin 1
1	ENSMUSG00000021054	-1.82936	0.264445	-0.237173	Sgpp1	sphingosine-1-phosphate phosphatase 1
1	ENSMUSG00000038351	-1.82124	0	1.38748	Sgsm2	small G protein signaling modulator 2
1	ENSMUSG00000050010	-1.96761	1.54503	-0.86226	Shisa3	shisa family member 3
1	ENSMUSG00000022494	-2.36197	1.38917	0.569376	Shisa9	shisa family member 9
1	ENSMUSG00000051504	-1.6268	0	0.136521	Siglech	sialic acid binding Ig-like lectin H
1	ENSMUSG00000043183	-1.34124	-1.09644	-0.645487	Simc1	SUMO-interacting motifs containing 1
1	ENSMUSG00000004642	-0.956121	0.365546	0.242767	Slbp	stem-loop binding protein
1	ENSMUSG00000027130	-2.14598	1.47151	1.10455	Slc12a6	solute carrier family 12, member 6
1	ENSMUSG00000031482	-0.975677	-0.317814	0	Slc25a15	solute carrier family 25 (mitochondrial carrier ornithine transporter), member 15
1	ENSMUSG00000050304	-1.23607	0	-0.143754	Slc25a2	solute carrier family 25 (mitochondrial carrier, ornithine transporter) member 2
1	ENSMUSG00000042268	-0.900406	0	0.0471775	Slc26a9	solute carrier family 26, member 9
1	ENSMUSG00000029221	-2.12207	-1.54631	0.373738	Slc30a9	solute carrier family 30 (zinc transporter), member 9
1	ENSMUSG00000018999	-1.32814	0	1.42767	Slc35b4	solute carrier family 35, member B4
1	ENSMUSG00000057193	-2.87229	0.113456	2.07862	Slc44a2	solute carrier family 44, member 2
1	ENSMUSG00000028544	-1.76635	0.468258	-0.331485	Slc5a9	solute carrier family 5 (sodium/glucose cotransporter), member 9
1	ENSMUSG00000045679	-2.31127	0.335872	-0.279887	Slc66a3	solute carrier family 66 member 3
1	ENSMUSG00000031297	-1.02013	0	-0.525977	Slc7a3	solute carrier family 7 (cationic amino acid transporter, y+ system), member 3
1	ENSMUSG00000032212	-1.00952	0.0810263	-0.144637	Sltm	SAFB-like, transcription modulator
1	ENSMUSG00000042772	-1.23211	0.610052	0.0109947	Smg7	SMG7 nonsense mediated mRNA decay factor
1	ENSMUSG00000031534	-0.911957	0.678923	0.0551759	Smim19	small integral membrane protein 19
1	ENSMUSG00000061461	-2.47155	0.675887	-0.0101373	Smim20	small integral membrane protein 20
1	ENSMUSG00000018363	-1.45856	-1.06425	0.0144253	Smurf2	SMAD specific E3 ubiquitin protein ligase 2
1	ENSMUSG00000006818	-1.36741	0.800613	-1.05444	Sod2	superoxide dismutase 2, mitochondrial
1	ENSMUSG00000001280	-0.900406	-0.153507	0.17504	Sp1	trans-acting transcription factor 1
1	ENSMUSG00000029723	-0.908906	0.826124	0.627299	Spacdr	sperm acrosome developmental regulator
1	ENSMUSG00000009549	-2.84898	2.07167	-0.491298	Srp14	signal recognition particle 14
1	ENSMUSG00000086219	-0.900406	0	0	Srrm4os	serine/arginine repetitive matrix 4, opposite strand
1	ENSMUSG00000070003	-1.67292	0.500061	0.372801	Ssbp4	single stranded DNA binding protein 4
1	ENSMUSG00000042121	-2.71832	2.38176	1.91832	Ssh1	slingshot protein phosphatase 1
1	ENSMUSG00000021427	-1.35745	-1.10923	-0.447225	Ssr1	signal sequence receptor, alpha
1	ENSMUSG00000029534	-2.1827	0.962123	0.0681784	St7	suppression of tumorigenicity 7
1	ENSMUSG00000026201	-2.71258	0.498446	1.3566	Stk16	serine/threonine kinase 16
1	ENSMUSG00000026094	-3.80132	2.95964	-1.04095	Stk17b	serine/threonine kinase 17b (apoptosis-inducing)
1	ENSMUSG00000028832	-1.40659	0	-0.251635	Stmn1	stathmin 1
1	ENSMUSG00000073155	-2.28786	-0.468789	1.12007	Stmp1	short transmembrane mitochondrial protein 1
1	ENSMUSG00000026027	-2.65081	-1.3814	-0.94303	Stradb	STE20-related kinase adaptor beta
1	ENSMUSG00000020738	-1.29986	0.90895	-1.25344	Sumo2	small ubiquitin-like modifier 2
1	ENSMUSG00000021457	-2.22906	1.14082	0.591122	Syk	spleen tyrosine kinase
1	ENSMUSG00000048277	-2.13246	-0.491897	-1.97345	Syngr2	synaptogyrin 2
1	ENSMUSG00000090935	-1.05762	-0.56261	-0.0842176	Synj2bp	synaptojanin 2 binding protein
1	ENSMUSG00000020570	-2.14096	-0.395449	-1.22029	Sypl	synaptophysin-like protein
1	ENSMUSG00000027220	-1.70508	0.802806	0.452247	Syt13	synaptotagmin XIII
1	ENSMUSG00000058159	-1.03615	0	0.293941	T2	brachyury 2
1	ENSMUSG00000031314	-2.98911	-0.187542	-0.332483	Taf1	TATA-box binding protein associated factor 1
1	ENSMUSG00000009995	-1.01909	0.225772	-0.396587	Tafazzin	tafazzin, phospholipid-lysophospholipid transacylase
1	ENSMUSG00000024308	-1.92664	0.737764	-0.126853	Tapbp	TAP binding protein
1	ENSMUSG00000041459	-1.88187	1.33442	-0.899881	Tardbp	TAR DNA binding protein
1	ENSMUSG00000022749	-1.26383	-0.149875	-0.552093	Tbc1d23	TBC1 domain family, member 23
1	ENSMUSG00000066621	-0.905695	0.369929	-0.059399	Tecpr1	tectonin beta-propeller repeat containing 1
1	ENSMUSG00000040548	-0.932195	0.141522	0.254116	Tex2	testis expressed gene 2
1	ENSMUSG00000040152	-2.07838	1.40288	-0.230333	Thbs1	thrombospondin 1
1	ENSMUSG00000030264	-1.77702	1.05677	0.00242991	Thumpd3	THUMP domain containing 3
1	ENSMUSG00000047819	-3.35659	0.0810263	-0.0932578	Tigd4	tigger transposable element derived 4
1	ENSMUSG00000040234	-1.9692	-0.639978	1.87447	Tm7sf3	transmembrane 7 superfamily member 3
1	ENSMUSG00000068040	-1.72258	-0.030513	0.572239	Tm9sf4	transmembrane 9 superfamily member 4
1	ENSMUSG00000050912	-1.81579	-0.60308	0.706773	Tmem123	transmembrane protein 123
1	ENSMUSG00000050640	-1.75243	0	0.900587	Tmem150c	transmembrane protein 150C
1	ENSMUSG00000086259	-1.6498	0	0.74438	Tmem150cos	transmembrane protein 150C, opposite strand
1	ENSMUSG00000054871	-3.12296	-0.909879	0.246183	Tmem158	transmembrane protein 158
1	ENSMUSG00000037720	-2.54277	2.10367	1.00318	Tmem33	transmembrane protein 33
1	ENSMUSG00000046748	-1.09397	0	0.618861	Tmem45a2	transmembrane protein 45A2
1	ENSMUSG00000028822	-1.75381	0.24597	1.58134	Tmem50a	transmembrane protein 50A
1	ENSMUSG00000061702	-0.900406	0	0.0932781	Tmem91	transmembrane protein 91
1	ENSMUSG00000079523	-3.39666	2.87097	-1.31901	Tmsb10	thymosin beta 10
1	ENSMUSG00000034723	-1.45462	1.29676	-1.28254	Tmx4	thioredoxin-related transmembrane protein 4
1	ENSMUSG00000022791	-1.20673	-0.56048	0.709855	Tnk2	tyrosine kinase, non-receptor, 2
1	ENSMUSG00000064179	-1.5652	-0.268066	0.200983	Tnnt1	troponin T1, skeletal, slow
1	ENSMUSG00000031691	-0.950917	0	0.218725	Tnpo2	transportin 2 (importin 3, karyopherin beta 2b)
1	ENSMUSG00000022427	-2.79274	1.51814	-1.61979	Tomm22	translocase of outer mitochondrial membrane 22
1	ENSMUSG00000027506	-2.48257	-0.248167	-0.785938	Tpd52	tumor protein D52
1	ENSMUSG00000028464	-1.37471	0.513737	1.13543	Tpm2	tropomyosin 2, beta
1	ENSMUSG00000031799	-1.73777	-0.58187	-0.102728	Tpm4	tropomyosin 4
1	ENSMUSG00000029030	-2.48375	-0.307045	-0.0370519	Tprgl	transformation related protein 63 regulated like
1	ENSMUSG00000029344	-1.11771	0.886778	0.11881	Tpst2	protein-tyrosine sulfotransferase 2
1	ENSMUSG00000022858	-1.41701	1.55505	-0.012679	Tra2b	transformer 2 beta
1	ENSMUSG00000027164	-1.60747	-0.0035198	1.15033	Traf6	TNF receptor-associated factor 6
1	ENSMUSG00000026028	-1.94471	0.631557	-0.845498	Trak2	trafficking protein, kinesin binding 2
1	ENSMUSG00000000374	-1.82216	1.3615	0.310632	Trappc10	trafficking protein particle complex 10
1	ENSMUSG00000042265	-1.08026	0.724879	-0.100137	Trem1	triggering receptor expressed on myeloid cells 1
1	ENSMUSG00000071068	-2.16344	2.50328	-0.953148	Treml2	triggering receptor expressed on myeloid cells-like 2
1	ENSMUSG00000053388	-0.900406	0	0	Trim50	tripartite motif-containing 50
1	ENSMUSG00000033088	-1.58613	-0.11644	-0.925593	Triobp	TRIO and F-actin binding protein
1	ENSMUSG00000026219	-1.8093	0.96095	0.0884665	Trip12	thyroid hormone receptor interactor 12
1	ENSMUSG00000037376	-1.10895	0	0.534857	Trmt6	tRNA methyltransferase 6
1	ENSMUSG00000059552	-1.1733	0	0	Trp53	transformation related protein 53
1	ENSMUSG00000043909	-1.18508	0.409361	1.15458	Trp53bp1	transformation related protein 53 binding protein 1
1	ENSMUSG00000037824	-1.53866	0.257602	0.0505261	Tspan14	tetraspanin 14
1	ENSMUSG00000026202	-2.33932	1.09898	1.4446	Tuba4a	tubulin, alpha 4A
1	ENSMUSG00000001525	-3.44375	0.930645	-0.428196	Tubb5	tubulin, beta 5 class I
1	ENSMUSG00000000759	-0.96367	0.387401	0.690769	Tubgcp3	tubulin, gamma complex associated protein 3
1	ENSMUSG00000033790	-1.47609	0.264445	-1.37725	Tubgcp5	tubulin, gamma complex associated protein 5
1	ENSMUSG00000035248	-1.14244	1.08196	-0.102514	Tut7	terminal uridylyl transferase 7
1	ENSMUSG00000024583	-1.90227	0.340117	-0.0370564	Txnl1	thioredoxin-like 1
1	ENSMUSG00000057130	-1.63586	-0.301148	0.139198	Txnl4a	thioredoxin-like 4A
1	ENSMUSG00000020250	-1.04661	0.664924	0.92991	Txnrd1	thioredoxin reductase 1
1	ENSMUSG00000032175	-1.22589	0.230014	-0.231001	Tyk2	tyrosine kinase 2
1	ENSMUSG00000090137	-1.07066	0.716337	0.664133	Uba52	ubiquitin A-52 residue ribosomal protein fusion product 1
1	ENSMUSG00000061390	-1.82816	-1.31827	0.334899	Uba52-ps	ubitquitin A-52 residue ribosomal protein fusion product 1, pseudogene
1	ENSMUSG00000068240	-2.03389	-0.161898	0.807026	Uba52rt	ubiquitin A-52 residue ribosomal protein fusion product 1, retrotransposed
1	ENSMUSG00000001403	-1.03412	-0.311044	0.241515	Ube2c	ubiquitin-conjugating enzyme E2C
1	ENSMUSG00000027011	-2.10983	-1.87623	0.105305	Ube2e3	ubiquitin-conjugating enzyme E2E 3
1	ENSMUSG00000034343	-2.50467	-0.183281	0.128364	Ube2f	ubiquitin-conjugating enzyme E2F (putative)
1	ENSMUSG00000038965	-1.21239	1.28025	0.659487	Ube2l3	ubiquitin-conjugating enzyme E2L 3
1	ENSMUSG00000025939	-1.02559	0	-0.453729	Ube2w	ubiquitin-conjugating enzyme E2W (putative)
1	ENSMUSG00000014349	-2.38319	-2.13113	0.277138	Ube2z	ubiquitin-conjugating enzyme E2Z
1	ENSMUSG00000001687	-2.52536	2.23295	0.260626	Ubl3	ubiquitin-like 3
1	ENSMUSG00000039473	-0.982478	1.03794	-0.889524	Ubn1	ubinuclein 1
1	ENSMUSG00000009741	-1.21039	-0.414528	-0.583292	Ubp1	upstream binding protein 1
1	ENSMUSG00000012126	-1.14944	1.01873	0.0400707	Ubxn11	UBX domain protein 11
1	ENSMUSG00000018189	-1.35026	0	1.148	Uchl5	ubiquitin carboxyl-terminal esterase L5
1	ENSMUSG00000031634	-1.64065	0.260451	-0.240085	Ufsp2	UFM1-specific peptidase 2
1	ENSMUSG00000001891	-0.900406	0.654131	0.488997	Ugp2	UDP-glucose pyrophosphorylase 2
1	ENSMUSG00000036572	-1.39125	0	0.0477151	Upf3b	UPF3 regulator of nonsense transcripts homolog B (yeast)
1	ENSMUSG00000025651	-0.913525	-0.585232	0.353258	Uqcrc1	ubiquinol-cytochrome c reductase core protein 1
1	ENSMUSG00000031010	-2.56317	1.92462	2.152	Usp9x	ubiquitin specific peptidase 9, X chromosome
1	ENSMUSG00000037355	-1.28989	0.0313531	-0.58179	Uvssa	UV stimulated scaffold protein A
1	ENSMUSG00000030403	-4.40798	1.73743	0.080131	Vasp	vasodilator-stimulated phosphoprotein
1	ENSMUSG00000033721	-1.09633	0.481623	-0.620666	Vav3	vav 3 oncogene
1	ENSMUSG00000045210	-0.986241	0.181066	0.695677	Vcpip1	valosin containing protein (p97)/p47 complex interacting protein 1
1	ENSMUSG00000021771	-1.38649	-0.113751	0.995961	Vdac2	voltage-dependent anion channel 2
1	ENSMUSG00000008892	-1.2882	-0.0944425	1.34762	Vdac3	voltage-dependent anion channel 3
1	ENSMUSG00000030315	-1.43507	1.03192	0.872334	Vgll4	vestigial like family member 4
1	ENSMUSG00000031913	-1.38036	0.919075	0.502755	Vps4a	vacuolar protein sorting 4A
1	ENSMUSG00000009907	-3.23727	-0.319265	-1.114	Vps4b	vacuolar protein sorting 4B
1	ENSMUSG00000017288	-3.23514	0.739951	-0.411235	Vps53	VPS53 GARP complex subunit
1	ENSMUSG00000035295	-1.45121	1.24313	0.548434	Wdr38	WD repeat domain 38
1	ENSMUSG00000031930	-1.50419	1.72001	0.290162	Wwp2	WW domain containing E3 ubiquitin protein ligase 2
1	ENSMUSG00000054626	-2.15193	0	-0.0452594	Xlr	X-linked lymphocyte-regulated
1	ENSMUSG00000053110	-3.94229	0.250694	0.979209	Yap1	yes-associated protein 1
1	ENSMUSG00000039770	-2.0212	-1.57961	-1.40626	Ypel5	yippee like 5
1	ENSMUSG00000076432	-1.68328	-1.02639	-1.25589	Ywhaq	tyrosine 3-monooxygenase/tryptophan 5-monooxygenase activation protein theta
1	ENSMUSG00000044617	-1.40659	0.264445	0.373561	Zbtb39	zinc finger and BTB domain containing 39
1	ENSMUSG00000018750	-1.13308	-0.023257	-0.814628	Zbtb4	zinc finger and BTB domain containing 4
1	ENSMUSG00000030471	-2.06657	-0.194354	0.146506	Zdhhc13	zinc finger, DHHC domain containing 13
1	ENSMUSG00000037553	-2.89422	0.185283	0.403174	Zdhhc18	zinc finger, DHHC domain containing 18
1	ENSMUSG00000001844	-0.98745	0.0658236	0.576824	Zdhhc4	zinc finger, DHHC domain containing 4
1	ENSMUSG00000021127	-2.85846	-0.11001	-0.334964	Zfp36l1	zinc finger protein 36, C3H type-like 1
1	ENSMUSG00000034522	-1.20878	0	0.0392059	Zfp395	zinc finger protein 395
1	ENSMUSG00000092312	-1.06406	0	0.0677677	Zfp419	zinc finger protein 419
1	ENSMUSG00000096795	-1.35442	0	1.47938	Zfp433	zinc finger protein 433
1	ENSMUSG00000059689	-1.69488	0.141522	-0.49682	Zfp637	zinc finger protein 637
1	ENSMUSG00000007812	-3.31165	-0.511966	-2.17151	Zfp655	zinc finger protein 655
1	ENSMUSG00000079215	-2.01719	-1.1551	-1.53292	Zfp664	zinc finger protein 664
1	ENSMUSG00000058291	-2.22739	0	-0.425973	Zfp68	zinc finger protein 68
1	ENSMUSG00000012640	-1.16389	1.27632	0.242942	Zfp715	zinc finger protein 715
1	ENSMUSG00000069743	-1.09397	0.225625	-0.342772	Zfp820	zinc finger protein 820
1	ENSMUSG00000049577	-1.09747	0.00511397	0.585289	Zfpm1	zinc finger protein, multitype 1
1	ENSMUSG00000053080	-1.73009	0.518417	0.391596	Zfta	zinc finger translocation associated
1	ENSMUSG00000034557	-1.09633	0	-0.853357	Zfyve9	zinc finger, FYVE domain containing 9
1	ENSMUSG00000027663	-1.56469	1.38489	0.401907	Zmat3	zinc finger matrin type 3
1	ENSMUSG00000014243	-1.67344	0.175729	-0.0906631	Zswim7	zinc finger SWIM-type containing 7
1	ENSMUSG00000000325	-1.18836	-0.126492	0.00215059	No assciated gene
1	ENSMUSG00000060393	-1.25112	-0.309439	-0.821379	No assciated gene
1	ENSMUSG00000062417	-0.900406	0	-0.224024	No assciated gene
1	ENSMUSG00000064168	-2.99381	-0.108134	0.964057	No assciated gene
1	ENSMUSG00000072829	-2.08312	-1.65749	0.123757	No assciated gene
1	ENSMUSG00000074497	-0.940419	0	-0.0915499	No assciated gene
1	ENSMUSG00000077967	-0.900406	0.0810263	-0.096557	No assciated gene
1	ENSMUSG00000078034	-1.1857	0	-0.153413	No assciated gene
1	ENSMUSG00000079709	-1.44815	0.849279	0.372285	No assciated gene
1	ENSMUSG00000080345	-0.900406	0	-0.200378	No assciated gene
1	ENSMUSG00000086869	-2.4776	0.466678	-0.257613	No assciated gene
1	ENSMUSG00000090399	-1.62419	-0.455298	-0.283789	No assciated gene
1	ENSMUSG00000092267	-2.31997	-0.975779	-0.383168	No assciated gene
1	ENSMUSG00000092916	-1.08051	0	0	No assciated gene
1	ENSMUSG00000095908	-1.24505	-0.573115	-0.66161	No assciated gene
1	ENSMUSG00000096807	-2.0903	-0.839024	1.95274	No assciated gene
1	ENSMUSG00000096944	-1.07387	0.545374	0.161249	No assciated gene
1	ENSMUSG00000097056	-1.25274	0.449944	1.33032	No assciated gene
1	ENSMUSG00000097417	-2.81141	0.284232	-0.312963	No assciated gene
1	ENSMUSG00000097664	-1.13458	0	-0.105474	No assciated gene
1	ENSMUSG00000099021	-2.11139	1.46682	0.44556	No assciated gene
1	ENSMUSG00000099193	-0.900406	0	0.136521	No assciated gene
1	ENSMUSG00000099250	-2.11923	1.46335	0.436831	No assciated gene
2	ENSMUSG00000085972	-0.355652	-1.1994	0.353861	1110028F11Rik	RIKEN cDNA 1110028F11 gene
2	ENSMUSG00000035171	0	-1.39311	-1.5094	1110059E24Rik	RIKEN cDNA 1110059E24 gene
2	ENSMUSG00000096935	-0.677491	-2.4698	-1.11929	1700113A16Rik	RIKEN cDNA 1700113A16 gene
2	ENSMUSG00000049643	0.168716	-0.875738	-0.304901	2310022A10Rik	RIKEN cDNA 2310022A10 gene
2	ENSMUSG00000089718	0.0931964	-1.53627	0.545125	2310075C17Rik	RIKEN cDNA 2310075C17 gene
2	ENSMUSG00000071632	0.620509	-0.721617	-0.196373	2510002D24Rik	RIKEN cDNA 2510002D24 gene
2	ENSMUSG00000043391	1.78038	-2.32208	-0.0733864	2510009E07Rik	RIKEN cDNA 2510009E07 gene
2	ENSMUSG00000071793	0.885746	-1.02016	0.566884	2610005L07Rik	RIKEN cDNA 2610005L07 gene
2	ENSMUSG00000028536	-0.338128	-1.51306	0.212918	2610528J11Rik	RIKEN cDNA 2610528J11 gene
2	ENSMUSG00000031938	0.656476	-2.26296	0.0734985	4931406C07Rik	RIKEN cDNA 4931406C07 gene
2	ENSMUSG00000087174	1.33766	-1.36273	0.929499	5530601H04Rik	RIKEN cDNA 5530601H04 gene
2	ENSMUSG00000009551	1.1442	-1.34529	0.00705816	6330409D20Rik	RIKEN cDNA 6330409D20 gene
2	ENSMUSG00000086474	0	-0.904748	0	9130204K15Rik	RIKEN cDNA 9130204K15 gene
2	ENSMUSG00000084808	0.168716	-0.801742	0	9430091E24Rik	RIKEN cDNA 9430091E24 gene
2	ENSMUSG00000086877	0	-1.597	0.361912	A230072C01Rik	RIKEN cDNA A230072C01 gene
2	ENSMUSG00000030111	0.123888	-0.812327	-0.183822	A2m	alpha-2-macroglobulin
2	ENSMUSG00000054426	-0.288776	-1.22845	1.03663	A930005H10Rik	RIKEN cDNA A930005H10 gene
2	ENSMUSG00000037257	0	-0.927816	0.145153	Aagab	alpha- and gamma-adaptin binding protein
2	ENSMUSG00000040584	0	-1.30312	-0.577932	Abcb1a	ATP-binding cassette, sub-family B (MDR/TAP), member 1A
2	ENSMUSG00000042476	0.467721	-1.95647	-1.47941	Abcb4	ATP-binding cassette, sub-family B (MDR/TAP), member 4
2	ENSMUSG00000035258	0.3364	-0.989772	-0.850735	Abi3bp	ABI family member 3 binding protein
2	ENSMUSG00000036138	0.168716	-0.868393	-0.426838	Acaa1a	acetyl-Coenzyme A acyltransferase 1A
2	ENSMUSG00000026781	-0.552787	-1.35358	-0.647469	Acbd5	acyl-Coenzyme A binding domain containing 5
2	ENSMUSG00000060923	0	-1.43315	0.452669	Acyp2	acylphosphatase 2, muscle type
2	ENSMUSG00000052593	0.652329	-1.9662	-0.633717	Adam17	a disintegrin and metallopeptidase domain 17
2	ENSMUSG00000039197	0	-1.10422	-0.934597	Adk	adenosine kinase
2	ENSMUSG00000029313	0.357171	-1.64689	0.209696	Aff1	AF4/FMR2 family, member 1
2	ENSMUSG00000033400	0.235796	-1.30118	1.20596	Agl	amylo-1,6-glucosidase, 4-alpha-glucanotransferase
2	ENSMUSG00000047804	-0.280851	-1.35842	-0.463031	Akap10	A kinase (PRKA) anchor protein 10
2	ENSMUSG00000053279	0.0344316	-1.62204	1.20184	Aldh1a1	aldehyde dehydrogenase family 1, subfamily A1
2	ENSMUSG00000000320	-1.34534	-1.55269	-0.194194	Alox12	arachidonate 12-lipoxygenase
2	ENSMUSG00000075232	-0.71588	-2.57888	0.868361	Amd1	S-adenosylmethionine decarboxylase 1
2	ENSMUSG00000063953	-0.456787	-2.63342	0.819157	Amd2	S-adenosylmethionine decarboxylase 2
2	ENSMUSG00000083823	-0.19114	-0.875651	-0.0317834	Amd-ps1	S-adenosylmethionine decarboxylase, pseudogene 1
2	ENSMUSG00000060096	0.069556	-2.70248	-0.28157	Amd-ps3	S-adenosylmethionine decarboxylase, pseudogene 3
2	ENSMUSG00000019836	-0.41284	-2.40885	0.0323214	Amd-ps4	S-adenosylmethionine decarboxylase, pseudogene 4
2	ENSMUSG00000035048	0	-1.24871	0.638322	Anapc13	anaphase promoting complex subunit 13
2	ENSMUSG00000022265	1.24359	-1.4188	-1.74425	Ank	progressive ankylosis
2	ENSMUSG00000040351	-1.9844	-3.54924	0.217586	Ankib1	ankyrin repeat and IBR domain containing 1
2	ENSMUSG00000021824	0.28801	-0.938738	-1.00558	Ap3m1	adaptor-related protein complex 3, mu 1 subunit
2	ENSMUSG00000094683	0	-0.90922	-0.374602	Ap3m1-ps	adaptor-related protein complex 3, mu 1 subunit, pseudogene
2	ENSMUSG00000020955	2.54087	-3.28177	-0.775442	Ap4s1	adaptor-related protein complex AP-4, sigma 1
2	ENSMUSG00000000049	0	-1.25302	0.140501	Apoh	apolipoprotein H
2	ENSMUSG00000038671	-0.407886	-1.03573	0.298709	Arfrp1	ADP-ribosylation factor related protein 1
2	ENSMUSG00000031389	-0.884051	-0.996023	0.499223	Arhgap4	Rho GTPase activating protein 4
2	ENSMUSG00000025132	0.981491	-2.77888	-1.18541	Arhgdia	Rho GDP dissociation inhibitor (GDI) alpha
2	ENSMUSG00000007880	-1.66721	-2.4587	-1.23409	Arid1a	AT rich interactive domain 1A (SWI-like)
2	ENSMUSG00000025035	0.976976	-1.13442	-0.375756	Arl3	ADP-ribosylation factor-like 3
2	ENSMUSG00000036093	1.46579	-1.40725	-0.775193	Arl5a	ADP-ribosylation factor-like 5A
2	ENSMUSG00000085861	0	-1.13772	0.136521	Armh2	armadillo-like helical domain containing 2
2	ENSMUSG00000008475	0.169305	-1.11858	0.0465772	Arpc5	actin related protein 2/3 complex, subunit 5
2	ENSMUSG00000030217	0.74118	-1.42689	0.445475	Art4	ADP-ribosyltransferase 4
2	ENSMUSG00000048040	0	-0.828596	0.306203	Arxes2	adipocyte-related X-chromosome expressed sequence 2
2	ENSMUSG00000022377	-0.708886	-1.57174	0.781152	Asap1	ArfGAP with SH3 domain, ankyrin repeat and PH domain1
2	ENSMUSG00000020305	0.489669	-1.16046	-1.16282	Asb3	ankyrin repeat and SOCS box-containing 3
2	ENSMUSG00000026192	0.100761	-1.25394	-0.949668	Atic	5-aminoimidazole-4-carboxamide ribonucleotide formyltransferase/IMP cyclohydrolase
2	ENSMUSG00000026576	1.16564	-0.88466	-0.455253	Atp1b1	ATPase, Na+/K+ transporting, beta 1 polypeptide
2	ENSMUSG00000016252	1.44274	-3.9789	0.654394	Atp5e	ATP synthase, H+ transporting, mitochondrial F1 complex, epsilon subunit
2	ENSMUSG00000022890	1.04251	-1.14085	-0.407992	Atp5j	ATP synthase, H+ transporting, mitochondrial F0 complex, subunit F
2	ENSMUSG00000050856	0.335985	-1.48169	1.2889	Atp5k	ATP synthase, H+ transporting, mitochondrial F1F0 complex, subunit E
2	ENSMUSG00000084168	-1.48988	-1.58913	0.270535	Atp5l2-ps	ATP synthase, H+ transporting, mitochondrial FO complex, subunit G2, pseudogene
2	ENSMUSG00000072460	-0.762901	-2.21012	1.14197	Atp5l-ps1	ATP synthase, H+ transporting, mitochondrial F0 complex, subunit G, pseudogene 1
2	ENSMUSG00000080823	-0.288507	-1.4112	0.0244607	Atp5l-ps2	ATP synthase, H+ transporting, mitochondrial F0 complex, subunit G, pseudogene 2
2	ENSMUSG00000031007	-0.0776352	-1.78549	-0.924346	Atp6ap2	ATPase, H+ transporting, lysosomal accessory protein 2
2	ENSMUSG00000033379	-0.115917	-1.35345	-0.0181637	Atp6v0b	ATPase, H+ transporting, lysosomal V0 subunit B
2	ENSMUSG00000021189	-0.280651	-1.07636	0.797441	Atxn3	ataxin 3
2	ENSMUSG00000037458	-0.762005	-1.75142	0.0558119	Azin1	antizyme inhibitor 1
2	ENSMUSG00000097414	0.471394	-0.977541	-0.201451	B130046B21Rik	RIKEN cDNA B130046B21 gene
2	ENSMUSG00000045767	1.10693	-2.72494	-1.10343	B230219D22Rik	RIKEN cDNA B230219D22 gene
2	ENSMUSG00000028413	-0.0160115	-1.86625	0.349344	B4galt1	UDP-Gal:betaGlcNAc beta 1,4- galactosyltransferase, polypeptide 1
2	ENSMUSG00000036299	1.57219	-3.38141	1.96953	BC031181	cDNA sequence BC031181
2	ENSMUSG00000002015	-0.275468	-2.94541	-0.0222149	Bcap31	B cell receptor associated protein 31
2	ENSMUSG00000005687	0.545258	-1.01011	-0.122951	Bcas2	BCAS2 pre-mRNA processing factor
2	ENSMUSG00000030268	0.580284	-0.90589	-0.694596	Bcat1	branched chain aminotransferase 1, cytosolic
2	ENSMUSG00000027381	0.462667	-1.26395	-0.632095	Bcl2l11	BCL2-like 11 (apoptosis facilitator)
2	ENSMUSG00000003190	0	-0.979809	0.695297	Bcl2l12	BCL2-like 12 (proline rich)
2	ENSMUSG00000053175	0	-0.92913	-0.256169	Bcl3	B cell leukemia/lymphoma 3
2	ENSMUSG00000009681	0.148944	-1.03163	-0.515086	Bcr	BCR activator of RhoGEF and GTPase
2	ENSMUSG00000032757	0.120403	-0.879566	-0.0994748	Bet1	Bet1 golgi vesicular membrane trafficking protein
2	ENSMUSG00000022089	0.266235	-1.36569	-0.704415	Bin3	bridging integrator 3
2	ENSMUSG00000014453	0.74118	-1.19795	0.326501	Blk	B lymphoid kinase
2	ENSMUSG00000010277	2.01661	-3.67777	0.920267	Bltp2	bridge-like lipid transfer protein family member 2
2	ENSMUSG00000022051	0.807092	-1.99242	0.3383	Bnip3l	BCL2/adenovirus E1B interacting protein 3-like
2	ENSMUSG00000062376	0.0894934	-0.957935	0.157939	Borcs7	BLOC-1 related complex subunit 7
2	ENSMUSG00000040859	0.311987	-1.43866	-0.759691	Bsdc1	BSD domain containing 1
2	ENSMUSG00000036707	2.09091	-2.64235	-0.132422	Cab39	calcium binding protein 39
2	ENSMUSG00000020882	0	-0.987692	-0.153413	Cacnb1	calcium channel, voltage-dependent, beta 1 subunit
2	ENSMUSG00000029761	-0.687253	-3.07496	0.337695	Cald1	caldesmon 1
2	ENSMUSG00000036438	-0.487544	-1.27321	-0.435806	Calm2	calmodulin 2
2	ENSMUSG00000029767	0.217886	-1.72228	0.901401	Calu	calumenin
2	ENSMUSG00000026933	0.168716	-0.847436	-0.0918132	Camsap1	calmodulin regulated spectrin-associated protein 1
2	ENSMUSG00000020368	-1.4112	-2.54575	0.749078	Canx	calnexin
2	ENSMUSG00000015189	-1.14735	-1.78719	-1.11447	Casd1	CAS1 domain containing 1
2	ENSMUSG00000031628	0.0630409	-1.56626	0.257853	Casp3	caspase 3
2	ENSMUSG00000000058	0.966898	-1.88302	-1.25147	Cav2	caveolin 2
2	ENSMUSG00000035640	1.20701	-1.42888	-0.797388	Cbarp	calcium channel, voltage-dependent, beta subunit associated regulatory protein
2	ENSMUSG00000040380	0.712589	-1.96106	0.932726	Cbln3	cerebellin 3 precursor protein
2	ENSMUSG00000019659	0.900684	-2.31175	-0.803588	Ccdc12	coiled-coil domain containing 12
2	ENSMUSG00000026578	0.171874	-2.61968	0.283558	Ccdc181	coiled-coil domain containing 181
2	ENSMUSG00000039983	-0.944439	-1.22197	-0.182373	Ccdc32	coiled-coil domain containing 32
2	ENSMUSG00000019897	0.74118	-0.862197	0.0168895	Ccdc59	coiled-coil domain containing 59
2	ENSMUSG00000061882	0.347704	-2.30359	0.522683	Ccdc62	coiled-coil domain containing 62
2	ENSMUSG00000063015	-0.368259	-3.43292	-0.366103	Ccni	cyclin I
2	ENSMUSG00000029068	-0.428309	-1.96698	-0.543086	Ccnl2	cyclin L2
2	ENSMUSG00000051439	0	-1.85733	0.331656	Cd14	CD14 antigen
2	ENSMUSG00000019818	0.47738	-0.945588	-0.989948	Cd164	CD164 antigen
2	ENSMUSG00000005763	1.62159	-1.36334	0.0338109	Cd247	CD247 antigen
2	ENSMUSG00000061665	0.207446	-2.03007	0.856283	Cd2ap	CD2-associated protein
2	ENSMUSG00000002944	-0.841745	-1.758	-1.26061	Cd36	CD36 molecule
2	ENSMUSG00000002033	0	-1.02944	-0.359061	Cd3g	CD3 antigen, gamma polypeptide
2	ENSMUSG00000040592	0.74118	-1.42462	-0.426162	Cd79b	CD79B antigen
2	ENSMUSG00000037706	0.634789	-0.822788	0.467488	Cd81	CD81 antigen
2	ENSMUSG00000033102	0.531951	-1.13569	-0.225419	Cdc14b	CDC14 cell division cycle 14B
2	ENSMUSG00000027330	1.65264	-1.92441	0.355494	Cdc25b	cell division cycle 25B
2	ENSMUSG00000006699	0.703979	-0.820428	-0.23329	Cdc42	cell division cycle 42
2	ENSMUSG00000026490	1.72048	-1.65631	1.30859	Cdc42bpa	CDC42 binding protein kinase alpha
2	ENSMUSG00000020015	0.0698234	-1.77337	0.972741	Cdk17	cyclin dependent kinase 17
2	ENSMUSG00000025358	-0.234176	-1.62278	-0.13896	Cdk2	cyclin dependent kinase 2
2	ENSMUSG00000029394	-0.3676	-0.86209	-0.476415	Cdk2ap1	cyclin dependent kinase 2 associated protein 1
2	ENSMUSG00000038069	1.70323	-1.56141	-0.273472	Cdkn2aip	CDKN2A interacting protein
2	ENSMUSG00000030878	-0.637009	-2.81797	0.789213	Cdr2	cerebellar degeneration-related 2
2	ENSMUSG00000023031	-0.186885	-2.18328	-0.0649557	Cela1	chymotrypsin-like elastase family, member 1
2	ENSMUSG00000029253	-0.195922	-0.987787	-0.583843	Cenpc1	centromere protein C1
2	ENSMUSG00000021669	-0.0654605	-1.68428	-0.683791	Cert1	ceramide transporter 1
2	ENSMUSG00000037971	-0.457054	-2.78407	-1.63611	Cfap68	cilia and flagella associated protein 68
2	ENSMUSG00000053768	1.03573	-1.55127	-1.43995	Chchd3	coiled-coil-helix-coiled-coil-helix domain containing 3
2	ENSMUSG00000042198	0.140478	-1.48693	0.0409905	Chchd7	coiled-coil-helix-coiled-coil-helix domain containing 7
2	ENSMUSG00000030930	-0.348564	-1.05076	0.289877	Chst15	carbohydrate sulfotransferase 15
2	ENSMUSG00000032381	-0.348956	-2.24781	-1.18869	Ciao2a	cytosolic iron-sulfur assembly component 2A
2	ENSMUSG00000001270	-0.1389	-1.28493	0.175458	Ckb	creatine kinase, brain
2	ENSMUSG00000027884	0	-1.20812	-0.206472	Clcc1	chloride channel CLIC-like 1
2	ENSMUSG00000063146	-0.640969	-2.577	-0.388445	Clip2	CAP-GLY domain containing linker protein 2
2	ENSMUSG00000025439	0	-1.38551	0.0962187	Clns1a	chloride channel, nucleotide-sensitive, 1A
2	ENSMUSG00000068617	0.168716	-0.933757	-0.606299	Clxn	calaxin
2	ENSMUSG00000030057	-0.340572	-1.33741	-0.984221	Cnbp	cellular nucleic acid binding protein
2	ENSMUSG00000036550	0.261902	-1.9265	0.645784	Cnot1	CCR4-NOT transcription complex, subunit 1
2	ENSMUSG00000038784	-0.0459717	-2.09445	-1.09483	Cnot4	CCR4-NOT transcription complex, subunit 4
2	ENSMUSG00000023973	0.215	-0.968792	0.231142	Cnpy3	canopy FGF signaling regulator 3
2	ENSMUSG00000038949	0.958715	-1.86322	-1.35145	Cnst	consortin, connexin sorting protein
2	ENSMUSG00000026112	-0.118597	-1.83537	-1.18458	Coa5	cytochrome C oxidase assembly factor 5
2	ENSMUSG00000042705	-0.666657	-1.65525	0.0718995	Commd10	COMM domain containing 10
2	ENSMUSG00000019494	0.498842	-1.49563	0.39766	Cops6	COP9 signalosome subunit 6
2	ENSMUSG00000026489	1.38318	-1.44412	0.987271	Coq8a	coenzyme Q8A
2	ENSMUSG00000031818	1.4306	-1.07378	0.705034	Cox4i1	cytochrome c oxidase subunit 4I1
2	ENSMUSG00000051811	-0.160738	-0.942031	0.477529	Cox6b2	cytochrome c oxidase subunit 6B2
2	ENSMUSG00000014313	-0.775256	-1.27407	0.150933	Cox6c	cytochrome c oxidase subunit 6C
2	ENSMUSG00000066491	0.0612261	-1.70097	-0.627006	Cox6c2	cytochrome c oxidase subunit 6C2
2	ENSMUSG00000032330	-1.20216	-1.35032	1.07571	Cox7a2	cytochrome c oxidase subunit 7A2
2	ENSMUSG00000016481	0.991227	-1.50349	-0.328743	Cr1l	complement component (3b/4b) receptor 1-like
2	ENSMUSG00000032652	-0.380091	-1.59457	-0.575065	Crebl2	cAMP responsive element binding protein-like 2
2	ENSMUSG00000058240	0.311255	-1.46276	-0.657725	Cryzl1	crystallin, zeta (quinone reductase)-like 1
2	ENSMUSG00000036356	0.88555	-1.18184	-0.988679	Csgalnact1	chondroitin sulfate N-acetylgalactosaminyltransferase 1
2	ENSMUSG00000046707	0	-2.02267	0.319117	Csnk2a2	casein kinase 2, alpha prime polypeptide
2	ENSMUSG00000005054	0	-2.18522	0.321471	Cstb	cystatin B
2	ENSMUSG00000004552	2.07074	-2.54155	-0.537509	Ctse	cathepsin E
2	ENSMUSG00000031078	-0.106313	-1.21491	-0.797736	Cttn	cortactin
2	ENSMUSG00000029686	1.77584	-1.37954	-0.651871	Cul1	cullin 1
2	ENSMUSG00000031446	0.74118	-1.9066	2.01063	Cul4a	cullin 4A
2	ENSMUSG00000029379	0.587842	-1.66738	-0.351128	Cxcl3	chemokine (C-X-C motif) ligand 3
2	ENSMUSG00000020340	1.58884	-3.33947	-1.76382	Cyfip2	cytoplasmic FMR1 interacting protein 2
2	ENSMUSG00000020589	1.58332	-2.26381	-0.0169468	Cyria	CYFIP related Rac1 interactor A
2	ENSMUSG00000097121	0	-0.798481	0	D130020L05Rik	RIKEN cDNA D130020L05 gene
2	ENSMUSG00000087269	0	-2.09511	-0.252712	D330023K18Rik	RIKEN cDNA D330023K18 gene
2	ENSMUSG00000029190	0.575844	-3.01136	0.238868	D5Ertd579e	DNA segment, Chr 5, ERATO Doi 579, expressed
2	ENSMUSG00000000346	0.0224475	-1.95664	0.13082	Dazap2	DAZ associated protein 2
2	ENSMUSG00000059824	0.0657763	-2.73826	0.374495	Dbp	D site albumin promoter binding protein
2	ENSMUSG00000035107	1.27784	-2.15978	-0.558702	Dcbld2	discoidin, CUB and LCCL domain containing 2
2	ENSMUSG00000041477	0.286258	-1.31691	0.406593	Dcp1b	decapping mRNA 1B
2	ENSMUSG00000027708	0.555915	-1.35702	-0.955513	Dcun1d1	DCN1, defective in cullin neddylation 1, domain containing 1 (S. cerevisiae)
2	ENSMUSG00000032002	0.902271	-0.844444	-0.431605	Dcun1d5	DCN1, defective in cullin neddylation 1, domain containing 5 (S. cerevisiae)
2	ENSMUSG00000078515	-0.360444	-1.91965	0.828404	Ddi2	DNA-damage inducible protein 2
2	ENSMUSG00000000787	0.548766	-2.15053	-0.819358	Ddx3x	DEAD box helicase 3, X-linked
2	ENSMUSG00000002257	0	-1.33429	0.330418	Def6	differentially expressed in FDCP 6
2	ENSMUSG00000018425	0.735941	-1.56003	0.102338	Dhx40	DEAH (Asp-Glu-Ala-His) box polypeptide 40
2	ENSMUSG00000029270	-0.389761	-2.1068	0.768363	Dipk1a	divergent protein kinase domain 1A
2	ENSMUSG00000032285	-1.00609	-1.45895	-1.56091	Dnaja4	DnaJ heat shock protein family (Hsp40) member A4
2	ENSMUSG00000029131	-0.420104	-1.17888	-0.0408803	Dnajb6	DnaJ heat shock protein family (Hsp40) member B6
2	ENSMUSG00000091905	-0.479159	-1.51486	-0.172069	Dnajb6-ps	DnaJ heat shock protein family (Hsp40) member B6, pseudogene
2	ENSMUSG00000014905	-0.398661	-2.4994	0.535104	Dnajb9	DnaJ heat shock protein family (Hsp40) member B9
2	ENSMUSG00000005980	0	-1.27732	0.210913	Dnase1	deoxyribonuclease I
2	ENSMUSG00000038608	-0.0375138	-1.73008	-0.392985	Dock10	dedicator of cytokinesis 10
2	ENSMUSG00000022960	0.777895	-1.49379	-0.939173	Donson	downstream neighbor of SON
2	ENSMUSG00000022946	0.799345	-1.32148	0.00196427	Dop1b	DOP1 leucine zipper like protein B
2	ENSMUSG00000001229	-0.431241	-1.03501	0.738793	Dpp9	dipeptidylpeptidase 9
2	ENSMUSG00000035765	-0.631029	-1.27766	0.0109155	Dym	dymeclin
2	ENSMUSG00000092074	-1.42026	-1.48418	0.363216	Dynlt1a	dynein light chain Tctex-type 1A
2	ENSMUSG00000096255	-1.39858	-2.20104	0.872726	Dynlt1b	dynein light chain Tctex-type 1B
2	ENSMUSG00000000579	-1.59508	-1.87117	0.724331	Dynlt1c	dynein light chain Tctex-type 1C
2	ENSMUSG00000095677	-1.81199	-1.96284	1.18153	Dynlt1f	dynein light chain Tctex-type 1F
2	ENSMUSG00000031176	0.700166	-1.5127	-0.534967	Dynlt3	dynein light chain Tctex-type 3
2	ENSMUSG00000022897	2.91803	-2.69052	-0.171108	Dyrk1a	dual-specificity tyrosine-(Y)-phosphorylation regulated kinase 1a
2	ENSMUSG00000087231	0.206165	-1.11715	-0.634793	E230016M11Rik	RIKEN cDNA E230016M11 gene
2	ENSMUSG00000057098	0.128254	-2.03208	-0.672261	Ebf1	early B cell factor 1
2	ENSMUSG00000019883	0.872468	-1.26275	-1.53745	Echdc1	enoyl Coenzyme A hydratase domain containing 1
2	ENSMUSG00000028108	-1.8872	-2.33323	-0.582409	Ecm1	extracellular matrix protein 1
2	ENSMUSG00000015002	-0.328163	-1.05009	0.132351	Efr3a	EFR3 homolog A
2	ENSMUSG00000027293	0.732869	-1.69097	-0.912189	Ehd4	EH-domain containing 4
2	ENSMUSG00000024991	1.31212	-1.05474	-0.513028	Eif3a	eukaryotic translation initiation factor 3, subunit A
2	ENSMUSG00000031029	2.71097	-2.96534	-1.25127	Eif3f	eukaryotic translation initiation factor 3, subunit F
2	ENSMUSG00000027236	0.987454	-2.34905	-1.05949	Eif3j1	eukaryotic translation initiation factor 3, subunit J1
2	ENSMUSG00000043424	0.808507	-2.55762	-2.20481	Eif3j2	eukaryotic translation initiation factor 3, subunit J2
2	ENSMUSG00000093661	0	-1.87043	-0.921908	Eif4e3	eukaryotic translation initiation factor 4E member 3
2	ENSMUSG00000056004	0.414827	-1.78654	1.08862	Elapor2	endosome-lysosome associated apoptosis and autophagy regulator family member 2
2	ENSMUSG00000031103	0.456803	-0.979809	0.26329	Elf4	E74-like factor 4 (ets domain transcription factor)
2	ENSMUSG00000026436	-0.30956	-2.40434	-0.595211	Elk4	ELK4, member of ETS oncogene family
2	ENSMUSG00000001542	1.16088	-1.22425	0.0527862	Ell2	elongation factor for RNA polymerase II 2
2	ENSMUSG00000079658	-0.482457	-1.61223	-0.205766	Eloc	elongin C
2	ENSMUSG00000027167	0	-0.952163	0.467927	Elp4	elongator acetyltransferase complex subunit 4
2	ENSMUSG00000078517	0.79038	-1.81677	0.789428	Emc1	ER membrane protein complex subunit 1
2	ENSMUSG00000071647	0.320953	-1.85899	0.514991	Eml3	echinoderm microtubule associated protein like 3
2	ENSMUSG00000051166	0.555381	-0.931622	0.403481	Eml5	echinoderm microtubule associated protein like 5
2	ENSMUSG00000069495	-0.0407634	-0.880043	-0.384078	Epc2	enhancer of polycomb homolog 2
2	ENSMUSG00000062312	0	-0.929953	-0.370988	Erbb2	erb-b2 receptor tyrosine kinase 2
2	ENSMUSG00000030304	0.665895	-0.776375	-0.565604	Ergic2	ERGIC and golgi 2
2	ENSMUSG00000028343	-0.45576	-1.64801	-1.72135	Erp44	endoplasmic reticulum protein 44
2	ENSMUSG00000024293	0.559647	-2.39538	0.625541	Esco1	establishment of sister chromatid cohesion N-acetyltransferase 1
2	ENSMUSG00000064254	0.654959	-0.741619	-0.096557	Ethe1	ethylmalonic encephalopathy 1
2	ENSMUSG00000030275	0.959936	-0.843925	0.0951139	Etnk1	ethanolamine kinase 1
2	ENSMUSG00000003382	-0.195922	-1.41393	-0.32384	Etv3	ets variant 3
2	ENSMUSG00000029763	0.228339	-2.32591	1.17643	Exoc4	exocyst complex component 4
2	ENSMUSG00000074030	0.120403	-1.30175	0.0912053	Exoc8	exocyst complex component 8
2	ENSMUSG00000038235	0.168716	-1.58628	0.556236	F11r	F11 receptor
2	ENSMUSG00000026579	1.11305	-1.29294	0.516868	F5	coagulation factor V
2	ENSMUSG00000045316	0.120403	-1.91973	0.600011	Fahd1	fumarylacetoacetate hydrolase domain containing 1
2	ENSMUSG00000074071	0.640152	-1.95827	0.133944	Fam169b	family with sequence similarity 169, member B
2	ENSMUSG00000070476	1.29584	-1.56933	-0.245844	Fam217b	family with sequence similarity 217, member B
2	ENSMUSG00000083012	1.53462	-1.43783	-0.842422	Fam220a	family with sequence similarity 220, member A
2	ENSMUSG00000001962	0.504449	-1.26622	-0.570415	Fam50a	family with sequence similarity 50, member A
2	ENSMUSG00000037808	-0.197065	-0.971574	-0.543861	Fam76b	family with sequence similarity 76, member B
2	ENSMUSG00000030303	0.834271	-2.86337	0.357649	Far2	fatty acyl CoA reductase 2
2	ENSMUSG00000046865	1.43872	-1.0774	0.558565	Fbl	fibrillarin
2	ENSMUSG00000032507	-1.04808	-1.42416	-0.451686	Fbxl2	F-box and leucine-rich repeat protein 2
2	ENSMUSG00000047648	0.390258	-1.45344	-0.0327942	Fbxo30	F-box protein 30
2	ENSMUSG00000020271	0.851851	-1.79716	0.453022	Fbxw11	F-box and WD-40 domain protein 11
2	ENSMUSG00000021273	0	-1.84662	0.0456658	Fdft1	farnesyl diphosphate farnesyl transferase 1
2	ENSMUSG00000053334	-0.176099	-2.28448	0.884431	Ficd	FIC domain containing
2	ENSMUSG00000038417	0.74118	-0.850752	-0.291812	Fig4	FIG4 phosphoinositide 5-phosphatase
2	ENSMUSG00000042642	0.120403	-1.51886	-0.518927	Flad1	flavin adenine dinucleotide synthetase 1
2	ENSMUSG00000033713	0.139335	-1.50735	-0.468422	Foxn3	forkhead box N3
2	ENSMUSG00000019843	2.67369	-2.15531	0.159749	Fyn	Fyn proto-oncogene
2	ENSMUSG00000044674	0.503574	-0.989237	-0.265331	Fzd1	frizzled class receptor 1
2	ENSMUSG00000036390	0.654257	-2.73853	-1.54009	Gadd45a	growth arrest and DNA-damage-inducible 45 alpha
2	ENSMUSG00000026867	0.232232	-2.26825	1.89211	Gapvd1	GTPase activating protein and VPS9 domains 1
2	ENSMUSG00000044576	0	-0.995536	0	Garem2	GRB2 associated regulator of MAPK1 subtype 2
2	ENSMUSG00000031162	0.410779	-2.13179	-0.136903	Gata1	GATA binding protein 1
2	ENSMUSG00000028124	0.269068	-1.58529	0.653309	Gclm	glutamate-cysteine ligase, modifier subunit
2	ENSMUSG00000038843	0.120403	-1.10337	0.25503	Gcnt1	glucosaminyl (N-acetyl) transferase 1, core 2
2	ENSMUSG00000041028	0.763724	-0.744046	-0.342438	Ghitm	growth hormone inducible transmembrane protein
2	ENSMUSG00000054435	0.168716	-1.28943	-0.596582	Gimap4	GTPase, IMAP family member 4
2	ENSMUSG00000019433	0.012242	-0.983019	-0.443878	Gipc1	GIPC PDZ domain containing family, member 1
2	ENSMUSG00000011884	-0.0335107	-1.83267	-1.69777	Gltp	glycolipid transfer protein
2	ENSMUSG00000066809	-0.702596	-0.962467	-0.404711	Gm10180	predicted gene 10180
2	ENSMUSG00000080932	1.25002	-1.33351	-0.541065	Gm10224	predicted pseudogene 10224
2	ENSMUSG00000070111	0	-0.99203	-0.287036	Gm10286	predicted gene 10286
2	ENSMUSG00000073486	0.641921	-0.769516	0.182274	Gm10518	predicted gene 10518
2	ENSMUSG00000084368	-0.590927	-1.54597	-0.145381	Gm11572	predicted gene 11572
2	ENSMUSG00000081643	0	-1.73205	-1.30616	Gm11605	predicted gene 11605
2	ENSMUSG00000081660	0.524461	-1.59116	-0.98232	Gm11787	predicted gene 11787
2	ENSMUSG00000060989	-2.04425	-2.07676	-0.467373	Gm11847	predicted gene 11847
2	ENSMUSG00000080904	0.13892	-1.11508	-0.687923	Gm11966	predicted gene 11966
2	ENSMUSG00000083859	0.933357	-0.959364	-0.628528	Gm12003	predicted gene 12003
2	ENSMUSG00000083555	0	-0.90589	0	Gm12035	predicted gene 12035
2	ENSMUSG00000084081	0.902271	-0.823225	-0.208547	Gm12057	predicted gene 12057
2	ENSMUSG00000083895	1.23853	-1.06772	-1.21194	Gm12074	predicted gene 12074
2	ENSMUSG00000081552	-0.595379	-1.2199	-0.696004	Gm12328	predicted gene 12328
2	ENSMUSG00000075576	0	-1.19839	0.617302	Gm12359	predicted gene 12359
2	ENSMUSG00000081953	-0.104068	-0.948245	-0.740084	Gm12435	predicted gene 12435
2	ENSMUSG00000084404	0.358513	-1.18281	-1.35714	Gm12513	predicted gene 12513
2	ENSMUSG00000063314	-0.132251	-1.23548	-0.857126	Gm12657	predicted gene 12657
2	ENSMUSG00000082768	0.234321	-1.01599	0.589147	Gm12727	predicted gene 12727
2	ENSMUSG00000083780	0.623384	-1.51177	0.0468314	Gm12728	predicted gene 12728
2	ENSMUSG00000085023	1.29402	-1.31393	0.804987	Gm12744	predicted gene 12744
2	ENSMUSG00000081305	-0.471395	-1.06872	-0.430373	Gm12879	predicted gene 12879
2	ENSMUSG00000087270	-0.878805	-1.19563	0.731358	Gm12983	predicted gene 12983
2	ENSMUSG00000070610	0	-1.27353	0.0398592	Gm13127	predicted gene 13127
2	ENSMUSG00000087187	0.685862	-0.764359	-0.227104	Gm13431	predicted gene 13431
2	ENSMUSG00000083270	0	-1.28309	-0.135112	Gm13498	predicted gene 13498
2	ENSMUSG00000081244	0.0220589	-1.81019	-1.64899	Gm13529	predicted gene 13529
2	ENSMUSG00000053472	0	-0.916859	-0.096557	Gm13534	predicted gene 13534
2	ENSMUSG00000075312	-0.679955	-1.71292	0.0471941	Gm13597	predicted gene 13597
2	ENSMUSG00000086922	0.673511	-2.98514	-0.771708	Gm13835	predicted gene 13835
2	ENSMUSG00000081275	0.731172	-0.695868	-0.16342	Gm13875	predicted gene 13875
2	ENSMUSG00000042938	0.234846	-0.902006	0.34604	Gm14117	predicted gene 14117
2	ENSMUSG00000082321	0.00319597	-1.43742	-0.189097	Gm14253	predicted gene 14253
2	ENSMUSG00000081416	0.759914	-1.01194	0.102568	Gm14383	predicted gene 14383
2	ENSMUSG00000081081	0	-1.14814	-1.02074	Gm14856	predicted gene 14856
2	ENSMUSG00000087261	0.937528	-1.96567	0.0962591	Gm15477	predicted gene 15477
2	ENSMUSG00000087367	0.168716	-1.39316	-0.413005	Gm15491	predicted gene 15491
2	ENSMUSG00000087138	0	-0.92913	0.276136	Gm15545	predicted gene 15545
2	ENSMUSG00000078183	0.168716	-0.983519	-0.533838	Gm15610	predicted gene 15610
2	ENSMUSG00000087108	0	-0.832421	-0.225022	Gm16093	predicted gene 16093
2	ENSMUSG00000089656	0.890755	-1.57623	0.464792	Gm16271	predicted gene 16271
2	ENSMUSG00000024761	1.19666	-2.47478	-0.500517	Gm16437	predicted pseudogene 16437
2	ENSMUSG00000089764	1.66546	-2.70998	-0.749496	Gm16580	predicted gene 16580
2	ENSMUSG00000091479	1.12316	-2.28527	-0.954532	Gm17035	predicted gene 17035
2	ENSMUSG00000094737	-0.556846	-1.16032	-1.23566	Gm17045	predicted gene 17045
2	ENSMUSG00000091613	-0.611876	-1.48899	-0.165926	Gm17046	predicted gene 17046
2	ENSMUSG00000096579	-0.901791	-1.00332	-0.665964	Gm17121	predicted gene 17121
2	ENSMUSG00000057945	0.120403	-2.25119	-0.460185	Gm17136	predicted gene 17136
2	ENSMUSG00000095512	-0.935892	-1.3771	-0.56473	Gm17222	predicted gene 17222
2	ENSMUSG00000091193	0	-1.4283	-0.675321	Gm17333	predicted gene, 17333
2	ENSMUSG00000082070	0.168716	-0.804143	-0.0141825	Gm1866	predicted gene 1866
2	ENSMUSG00000075286	0.181992	-2.09791	-0.9537	Gm1968	predicted gene 1968
2	ENSMUSG00000092428	0.14419	-1.19791	-1.02257	Gm20545	predicted gene 20545
2	ENSMUSG00000078850	0	-1.35486	-0.169992	Gm2348	predicted pseudogene 2348
2	ENSMUSG00000089197	-0.361717	-1.4731	0.576382	Gm25767	predicted gene, 25767
2	ENSMUSG00000097763	0	-1.43033	1.206	Gm26636	predicted gene, 26636
2	ENSMUSG00000097903	0.700833	-0.985055	0.669749	Gm26679	predicted gene, 26679
2	ENSMUSG00000098043	-0.0497459	-2.08302	-1.34138	Gm26980	predicted gene, 26980
2	ENSMUSG00000089659	0	-0.873353	0	Gm3470	predicted gene 3470
2	ENSMUSG00000094955	-0.404218	-1.02544	-0.396384	Gm3699	predicted gene 3699
2	ENSMUSG00000083922	-0.713283	-1.1293	0.913192	Gm3835	predicted pseudogene 3835
2	ENSMUSG00000079139	-0.157192	-1.19771	-1.02632	Gm4204	predicted gene 4204
2	ENSMUSG00000081473	-0.593983	-1.44473	0.473002	Gm4853	predicted pseudogene 4853
2	ENSMUSG00000084061	0	-1.07645	0	Gm4996	predicted gene 4996
2	ENSMUSG00000055795	0.374772	-1.70984	-0.614607	Gm5160	predicted gene 5160
2	ENSMUSG00000058622	1.37852	-1.42451	-0.304767	Gm5265	predicted pseudogene 5265
2	ENSMUSG00000081350	-0.486357	-1.16327	-0.457257	Gm5388	predicted gene 5388
2	ENSMUSG00000094242	-0.889431	-1.8657	-0.49934	Gm5456	predicted gene 5456
2	ENSMUSG00000096726	0.411556	-1.61057	-0.300952	Gm5558	predicted gene 5558
2	ENSMUSG00000069014	-1.27161	-1.90178	-0.510081	Gm5641	predicted gene 5641
2	ENSMUSG00000082988	0	-1.12625	0.0853892	Gm5903	predicted gene 5903
2	ENSMUSG00000068200	0	-1.29625	0.300832	Gm5931	predicted pseudogene 5931
2	ENSMUSG00000062081	-1.44538	-1.78189	1.20305	Gm6055	predicted gene 6055
2	ENSMUSG00000093392	1.06973	-0.931487	0.58184	Gm6061	predicted gene 6061
2	ENSMUSG00000068629	0.300523	-1.36312	-1.63426	Gm6155	predicted pseudogene 6155
2	ENSMUSG00000090381	0.382114	-1.46126	0.297125	Gm6158	predicted gene 6158
2	ENSMUSG00000081441	-0.589673	-1.04905	-0.0906631	Gm6161	predicted gene 6161
2	ENSMUSG00000066538	-0.339161	-0.920243	0	Gm6254	predicted gene 6254
2	ENSMUSG00000080966	1.05228	-1.30239	0.0286467	Gm6263	predicted gene 6263
2	ENSMUSG00000089640	-0.490791	-1.09483	-0.135112	Gm6397	predicted gene 6397
2	ENSMUSG00000089906	2.28972	-1.83695	-1.15235	Gm6428	predicted pseudogene 6428
2	ENSMUSG00000087153	1.22813	-1.39545	-1.27106	Gm6483	predicted gene 6483
2	ENSMUSG00000092086	-1.86807	-2.02213	-0.315236	Gm6793	predicted gene 6793
2	ENSMUSG00000043483	0.0641836	-1.36903	-0.641037	Gm6863	predicted gene 6863
2	ENSMUSG00000093826	1.82678	-1.94714	-0.319013	Gm6900	predicted gene 6900
2	ENSMUSG00000075288	1.36383	-1.48919	-0.373091	Gm6913	predicted gene 6913
2	ENSMUSG00000068480	0	-1.0282	0	Gm7551	predicted gene 7551
2	ENSMUSG00000082204	0	-0.903128	-0.127467	Gm7722	predicted gene 7722
2	ENSMUSG00000085720	0	-1.17955	0	Gm7854	predicted gene 7854
2	ENSMUSG00000049124	0.346051	-1.35949	0.451277	Gm8186	predicted gene 8186
2	ENSMUSG00000047905	-0.227348	-1.7844	0.0450884	Gm8566	predicted pseudogene 8566
2	ENSMUSG00000083166	0.471987	-1.00507	-0.221652	Gm8648	predicted gene 8648
2	ENSMUSG00000059179	-0.721712	-1.96939	0.223497	Gm8991	predicted pseudogene 8991
2	ENSMUSG00000083033	0.235796	-0.804233	-0.544403	Gm9083	predicted gene 9083
2	ENSMUSG00000082541	0.3364	-0.759933	0.111974	Gm9095	predicted gene 9095
2	ENSMUSG00000081230	0.434232	-0.759933	-0.0297084	Gm9097	predicted gene 9097
2	ENSMUSG00000058050	1.17313	-1.7433	-0.292102	Gm9234	predicted pseudogene 9234
2	ENSMUSG00000083468	0	-0.83461	0.136521	Gm9431	predicted gene 9431
2	ENSMUSG00000097906	-2.00571	-2.30452	-2.27612	Gm9625	predicted gene 9625
2	ENSMUSG00000000149	0	-1.08423	-0.0478641	Gna12	guanine nucleotide binding protein, alpha 12
2	ENSMUSG00000024639	1.66765	-2.88331	0.578948	Gnaq	guanine nucleotide binding protein, alpha q polypeptide
2	ENSMUSG00000032192	0	-0.947261	-0.506656	Gnb5	guanine nucleotide binding protein (G protein), beta 5
2	ENSMUSG00000032766	-0.219689	-2.39602	-0.739275	Gng11	guanine nucleotide binding protein (G protein), gamma 11
2	ENSMUSG00000024429	0	-1.43965	-0.392603	Gnl1	guanine nucleotide binding protein-like 1
2	ENSMUSG00000029209	0.806376	-2.37951	1.09298	Gnpda2	glucosamine-6-phosphate deaminase 2
2	ENSMUSG00000046519	0.320953	-0.922339	0.535726	Golph3l	golgi phosphoprotein 3-like
2	ENSMUSG00000019861	0	-1.11248	0.21186	Gopc	golgi associated PDZ and coiled-coil motif containing
2	ENSMUSG00000050675	1.33248	-3.8922	0.711298	Gp1ba	glycoprotein 1b, alpha polypeptide
2	ENSMUSG00000050761	0.413181	-2.27388	0.0334194	Gp1bb	glycoprotein Ib, beta polypeptide
2	ENSMUSG00000022008	-0.197065	-1.12116	-0.609129	Gpalpp1	GPALPP motifs containing 1
2	ENSMUSG00000021298	0.544115	-1.29663	-1.62639	Gpr132	G protein-coupled receptor 132
2	ENSMUSG00000041762	0	-1.30278	-0.177307	Gpr155	G protein-coupled receptor 155
2	ENSMUSG00000050075	0.168716	-2.01341	-0.101588	Gpr171	G protein-coupled receptor 171
2	ENSMUSG00000073008	-0.197065	-1.39521	0.165359	Gpr174	G protein-coupled receptor 174
2	ENSMUSG00000035148	0	-0.809184	-0.123638	Gpr33	G protein-coupled receptor 33
2	ENSMUSG00000059923	1.25792	-4.36148	-1.60577	Grb2	growth factor receptor bound protein 2
2	ENSMUSG00000035637	0.235796	-2.07226	-0.248319	Grhpr	glyoxylate reductase/hydroxypyruvate reductase
2	ENSMUSG00000022564	-0.0947365	-1.27867	-0.0966759	Grina	glutamate receptor, ionotropic, N-methyl D-aspartate-associated protein 1 (glutamate binding)
2	ENSMUSG00000038515	-0.571893	-1.27591	-0.584046	Grtp1	GH regulated TBC protein 1
2	ENSMUSG00000022812	1.6421	-1.53694	0.560771	Gsk3b	glycogen synthase kinase 3 beta
2	ENSMUSG00000060803	0.235796	-1.07135	0.108857	Gstp1	glutathione S-transferase, pi 1
2	ENSMUSG00000036890	-1.18952	-1.78876	1.51875	Gtdc1	glycosyltransferase-like domain containing 1
2	ENSMUSG00000016503	0	-0.916859	0.326404	Gtf3a	general transcription factor III A
2	ENSMUSG00000029208	1.24183	-2.01741	0.488181	Guf1	GUF1 homolog, GTPase
2	ENSMUSG00000090523	0.178793	-1.50304	-0.22739	Gypc	glycophorin C
2	ENSMUSG00000064220	-1.04028	-1.59071	1.53876	H2ac18	H2A clustered histone 18
2	ENSMUSG00000041126	0.19952	-1.80711	0.00701304	H2az2	H2A.Z histone variant 2
2	ENSMUSG00000094338	-1.19975	-1.52091	1.42475	H2bc13	H2B clustered histone 13
2	ENSMUSG00000047246	-0.363248	-2.15951	-0.465787	H2bc6	H2B clustered histone 6
2	ENSMUSG00000082284	-0.361147	-1.78155	-0.939835	H3f3a-ps1	H3.3 histone A, pseudogene 1
2	ENSMUSG00000081176	-0.312295	-2.77861	-0.958595	H3f3a-ps2	H3.3 histone A, pseudogene 2
2	ENSMUSG00000082029	-0.161309	-1.20666	-0.445465	H3f3c	H3 histone, family 3C
2	ENSMUSG00000059447	0.831615	-1.10486	-0.478517	Hadhb	hydroxyacyl-CoA dehydrogenase trifunctional multienzyme complex subunit beta
2	ENSMUSG00000063684	-0.197065	-0.848046	-0.560004	Hadhb-ps	hydroxyacyl-CoA dehydrogenase trifunctional multienzyme complex subunit beta, pseudogene
2	ENSMUSG00000024158	-0.0723905	-1.88257	-1.01894	Hagh	hydroxyacyl glutathione hydrolase
2	ENSMUSG00000058979	0.266889	-0.853562	0.234799	Hdhd5	haloacid dehalogenase like hydrolase domain containing 5
2	ENSMUSG00000039879	1.24475	-2.00546	-0.770389	Heca	hdc homolog, cell cycle regulator
2	ENSMUSG00000028332	0.387292	-0.984352	0.402727	Hemgn	hemogen
2	ENSMUSG00000038664	0.3364	-1.84844	-0.41668	Herc1	HECT and RLD domain containing E3 ubiquitin protein ligase family member 1
2	ENSMUSG00000037012	-0.203269	-1.10044	-0.455472	Hk1	hexokinase 1
2	ENSMUSG00000002428	0	-0.798702	0	Hltf	helicase-like transcription factor
2	ENSMUSG00000093930	0	-1.01297	-0.924201	Hmgcs1	3-hydroxy-3-methylglutaryl-Coenzyme A synthase 1
2	ENSMUSG00000040681	-0.992067	-1.00543	-0.561905	Hmgn1	high mobility group nucleosomal binding domain 1
2	ENSMUSG00000026986	0	-0.943264	0.191627	Hnmt	histamine N-methyltransferase
2	ENSMUSG00000059005	-1.27781	-1.62562	0.134639	Hnrnpa3	heterogeneous nuclear ribonucleoprotein A3
2	ENSMUSG00000045427	0.941463	-2.67525	-0.702438	Hnrnph2	heterogeneous nuclear ribonucleoprotein H2
2	ENSMUSG00000066037	0.89859	-1.823	-0.321911	Hnrnpr	heterogeneous nuclear ribonucleoprotein R
2	ENSMUSG00000028572	0.289119	-1.96717	-1.20428	Hook1	hook microtubule tethering protein 1
2	ENSMUSG00000037234	-3.46338	-3.89992	-0.802562	Hook3	hook microtubule tethering protein 3
2	ENSMUSG00000071379	1.44363	-1.53389	0.355648	Hpcal1	hippocalcin-like 1
2	ENSMUSG00000031613	0.352525	-1.75479	0.456481	Hpgd	hydroxyprostaglandin dehydrogenase 15 (NAD)
2	ENSMUSG00000031839	0.590227	-1.00125	0.737237	Hsbp1	heat shock factor binding protein 1
2	ENSMUSG00000028383	-0.564481	-1.5223	0.275005	Hsdl2	hydroxysteroid dehydrogenase like 2
2	ENSMUSG00000023944	-0.773712	-2.95439	-0.644646	Hsp90ab1	heat shock protein 90 alpha (cytosolic), class B member 1
2	ENSMUSG00000025757	-0.137495	-1.12478	-0.189432	Hspa4l	heat shock protein 4 like
2	ENSMUSG00000026864	0	-0.92175	-0.371429	Hspa5	heat shock protein 5
2	ENSMUSG00000081189	-0.829785	-0.991371	-0.0324435	Hspd1-ps4	heat shock protein 1 (chaperonin), pseudogene 4
2	ENSMUSG00000073676	0.335985	-1.59879	-1.14231	Hspe1	heat shock protein 1 (chaperonin 10)
2	ENSMUSG00000049246	0	-1.39438	-0.342952	Hspe1-ps2	heat shock protein 1 (chaperonin 10), pseudogene 2
2	ENSMUSG00000092344	0.335985	-1.25457	-0.285525	Hspe1-ps3	heat shock protein 1 (chaperonin 10), pseudogene 3
2	ENSMUSG00000062054	0.738419	-3.99431	-0.468394	Iah1	isoamyl acetate-hydrolyzing esterase 1 homolog
2	ENSMUSG00000027406	0.489705	-0.867612	0.483553	Idh3b	isocitrate dehydrogenase 3 (NAD+) beta
2	ENSMUSG00000045932	-0.0981497	-1.32556	-0.66314	Ifit2	interferon-induced protein with tetratricopeptide repeats 2
2	ENSMUSG00000036256	-0.234176	-1.5766	-0.0906075	Igfbp7	insulin-like growth factor binding protein 7
2	ENSMUSG00000018168	0.987331	-1.22094	0.506014	Ikzf3	IKAROS family zinc finger 3
2	ENSMUSG00000031712	1.61042	-1.64884	-0.965642	Il15	interleukin 15
2	ENSMUSG00000026070	0	-1.06734	-0.521007	Il18r1	interleukin 18 receptor 1
2	ENSMUSG00000027720	-0.0204723	-1.07316	0.560042	Il2	interleukin 2
2	ENSMUSG00000030890	0.819926	-1.97502	0.55537	Ilk	integrin linked kinase
2	ENSMUSG00000074918	-1.13911	-1.90239	0.866802	Inafm2	InaF motif containing 2
2	ENSMUSG00000037940	1.24554	-2.25493	-1.51492	Inpp4b	inositol polyphosphate-4-phosphatase, type II
2	ENSMUSG00000032594	-0.771218	-1.82795	0.178005	Ip6k1	inositol hexaphosphate kinase 1
2	ENSMUSG00000031627	0.608097	-1.33567	-0.577888	Irf2	interferon regulatory factor 2
2	ENSMUSG00000041515	0	-1.21523	0.165149	Irf8	interferon regulatory factor 8
2	ENSMUSG00000044792	1.71313	-1.33945	-0.597563	Isca1	iron-sulfur cluster assembly 1
2	ENSMUSG00000025825	-0.829247	-2.3792	-0.218361	Iscu	iron-sulfur cluster assembly enzyme
2	ENSMUSG00000034664	-0.0460729	-3.15291	-0.572595	Itga2b	integrin alpha 2b
2	ENSMUSG00000027087	-0.638505	-1.10611	-0.381023	Itgav	integrin alpha V
2	ENSMUSG00000074797	0	-1.94414	0.40076	Itpa	inosine triphosphatase (nucleoside triphosphate pyrophosphatase)
2	ENSMUSG00000020737	-0.652436	-1.0668	-0.549077	Jpt1	Jupiter microtubule associated homolog 1
2	ENSMUSG00000061751	0.289119	-1.21646	0.78221	Kalrn	kalirin, RhoGEF kinase
2	ENSMUSG00000032034	2.7547	-3.03556	-1.21316	Kcnj5	potassium inwardly-rectifying channel, subfamily J, member 5
2	ENSMUSG00000001098	-0.0272068	-0.94192	0.497354	Kctd10	potassium channel tetramerisation domain containing 10
2	ENSMUSG00000053684	0	-1.08394	0.808656	Kics2	KICSTOR subunit 2
2	ENSMUSG00000055652	0	-1.08789	0.634043	Klhl25	kelch-like 25
2	ENSMUSG00000030154	0	-1.86363	-0.0576972	Klrb1f	killer cell lectin-like receptor subfamily B member 1F
2	ENSMUSG00000001440	0.0398732	-1.56196	-0.883291	Kpnb1	karyopherin (importin) beta 1
2	ENSMUSG00000035849	0	-1.33165	0.365059	Krt222	keratin 222
2	ENSMUSG00000022986	-0.197065	-1.85994	0.304599	Krt75	keratin 75
2	ENSMUSG00000021843	-0.235468	-3.02861	-0.7	Ktn1	kinectin 1
2	ENSMUSG00000031447	0.604157	-1.44397	0.337687	Lamp1	lysosomal-associated membrane protein 1
2	ENSMUSG00000030842	0.462667	-1.89537	0.117611	Lamtor1	late endosomal/lysosomal adaptor, MAPK and MTOR activator 1
2	ENSMUSG00000039682	0	-1.09957	0.496197	Lap3	leucine aminopeptidase 3
2	ENSMUSG00000033499	0.163846	-0.87744	-0.601467	Larp4b	La ribonucleoprotein 4B
2	ENSMUSG00000027968	0.168716	-1.21031	-0.096557	Larp7	La ribonucleoprotein 7, transcriptional regulator
2	ENSMUSG00000030742	0.828701	-1.68378	-0.691919	Lat	linker for activation of T cells
2	ENSMUSG00000002699	1.52984	-1.27361	-0.00886274	Lcp2	lymphocyte cytosolic protein 2
2	ENSMUSG00000027985	-0.453741	-1.77972	-0.162059	Lef1	lymphoid enhancer binding factor 1
2	ENSMUSG00000031513	0.0969069	-1.79226	0.813091	Leprotl1	leptin receptor overlapping transcript-like 1
2	ENSMUSG00000057554	0	-1.60083	-0.417791	Lgals8	lectin, galactose binding, soluble 8
2	ENSMUSG00000020536	0.905765	-0.969477	0.792436	Llgl1	LLGL1 scribble cell polarity complex component
2	ENSMUSG00000022999	0.390258	-1.51228	1.14782	Lmbr1l	limb region 1 like
2	ENSMUSG00000032698	-0.0820921	-1.20716	-0.309717	Lmo2	LIM domain only 2
2	ENSMUSG00000038765	0.168716	-1.34426	0	Lmx1b	LIM homeobox transcription factor 1 beta
2	ENSMUSG00000034158	-0.955988	-1.96198	0.382176	Lrrc58	leucine rich repeat containing 58
2	ENSMUSG00000021997	0	-1.45342	0.290175	Lrrc63	leucine rich repeat containing 63
2	ENSMUSG00000054720	-0.615621	-3.24345	-0.851515	Lrrc8c	leucine rich repeat containing 8 family, member C
2	ENSMUSG00000036273	0	-0.797616	-0.365851	Lrrk2	leucine-rich repeat kinase 2
2	ENSMUSG00000042228	-0.103417	-1.64727	-0.614822	Lyn	LYN proto-oncogene, Src family tyrosine kinase
2	ENSMUSG00000022761	0.235796	-0.770747	0.0453793	Lztr1	leucine-zipper-like transcriptional regulator, 1
2	ENSMUSG00000035342	0.283258	-1.35539	-0.980008	Lzts2	leucine zipper, putative tumor suppressor 2
2	ENSMUSG00000007458	-1.31613	-1.46489	1.19649	M6pr	mannose-6-phosphate receptor, cation dependent
2	ENSMUSG00000022553	0.536318	-1.91098	-1.70822	Maf1	MAF1 homolog, negative regulator of RNA polymerase III
2	ENSMUSG00000031179	0.157848	-1.87718	0.136521	Magea9	MAGE family member A9
2	ENSMUSG00000042032	0.552786	-0.986293	-0.352397	Mat2b	methionine adenosyltransferase II, beta
2	ENSMUSG00000037236	-0.151654	-1.76585	-0.102954	Matr3	matrin 3
2	ENSMUSG00000037523	0.167606	-1.4531	-0.133908	Mavs	mitochondrial antiviral signaling protein
2	ENSMUSG00000022139	0.777394	-2.24531	0.925384	Mbnl2	muscleblind like splicing factor 2
2	ENSMUSG00000041859	0.531951	-1.20914	0.00737726	Mcm3	minichromosome maintenance complex component 3
2	ENSMUSG00000039842	-0.68708	-1.22271	0.852041	Mcph1	microcephaly, primary autosomal recessive 1
2	ENSMUSG00000037570	0	-1.77525	0.16992	Mcrs1	microspherule protein 1
2	ENSMUSG00000021371	-0.619117	-0.947081	0.186044	Mcur1	mitochondrial calcium uniporter regulator 1
2	ENSMUSG00000061607	-1.06909	-3.06544	0.780964	Mdc1	mediator of DNA damage checkpoint 1
2	ENSMUSG00000043557	0.74118	-2.8171	-1.81039	Mdga1	MAM domain containing glycosylphosphatidylinositol anchor 1
2	ENSMUSG00000021598	0.120403	-1.23934	-0.377219	Med10	mediator complex subunit 10
2	ENSMUSG00000056476	1.35805	-2.90797	-2.92063	Med12l	mediator complex subunit 12-like
2	ENSMUSG00000034297	-0.0596013	-1.63134	-1.2385	Med13	mediator complex subunit 13
2	ENSMUSG00000001419	-0.677491	-2.39286	-1.4875	Mef2d	myocyte enhancer factor 2D
2	ENSMUSG00000035683	0.168716	-1.15748	0.561133	Melk	maternal embryonic leucine zipper kinase
2	ENSMUSG00000058704	-0.623824	-1.38599	-1.18334	Memo1	mediator of cell motility 1
2	ENSMUSG00000040557	0	-1.33285	0.0592565	Mettl27	methyltransferase like 27
2	ENSMUSG00000020818	0.235796	-1.7498	-0.434863	Mfsd11	major facilitator superfamily domain containing 11
2	ENSMUSG00000008540	0.200261	-0.781068	-0.121823	Mgst1	microsomal glutathione S-transferase 1
2	ENSMUSG00000049760	0	-0.909862	-0.256169	Micos13	mitochondrial contact site and cristae organizing system subunit 13
2	ENSMUSG00000035299	0.428822	-0.785128	0.206613	Mid1	midline 1
2	ENSMUSG00000002580	0.585082	-1.23697	1.2164	Mien1	migration and invasion enhancer 1
2	ENSMUSG00000042444	-0.990476	-2.00847	0.609374	Mindy2	MINDY lysine 48 deubiquitinase 2
2	ENSMUSG00000020827	0.0143581	-1.49896	-0.278098	Mink1	misshapen-like kinase 1 (zebrafish)
2	ENSMUSG00000065599	0	-1.04634	0	Mir23b	microRNA 23b
2	ENSMUSG00000065475	0	-0.99203	0	Mir27b	microRNA 27b
2	ENSMUSG00000093037	0	-0.798966	0	Mir3066	microRNA 3066
2	ENSMUSG00000098343	0.470921	-0.904748	0.140527	Mir6240	microRNA 6240
2	ENSMUSG00000027274	-0.376618	-1.13387	-0.583333	Mkks	McKusick-Kaufman syndrome
2	ENSMUSG00000029922	1.70029	-2.23735	-0.751521	Mkrn1	makorin, ring finger protein, 1
2	ENSMUSG00000061273	0.235796	-0.90589	-0.199621	Mmgt1	membrane magnesium transporter 1
2	ENSMUSG00000027612	0.168716	-0.952163	0.243692	Mmp24	matrix metallopeptidase 24
2	ENSMUSG00000074649	0	-0.952163	0.166673	Mmp24os1	matrix metallopeptidase 24 opposite strand transcript 1
2	ENSMUSG00000005800	-0.361717	-1.71184	-0.267195	Mmp8	matrix metallopeptidase 8
2	ENSMUSG00000023921	0.352525	-1.35941	-0.141897	Mmut	methylmalonyl-Coenzyme A mutase
2	ENSMUSG00000006262	1.04384	-2.14845	-0.287015	Mob1b	MOB kinase activator 1B
2	ENSMUSG00000003348	1.9871	-1.85069	-1.32299	Mob3a	MOB kinase activator 3A
2	ENSMUSG00000037221	-0.858783	-0.941241	0	Mospd3	motile sperm domain containing 3
2	ENSMUSG00000006389	-0.300622	-2.07621	-0.485167	Mpl	myeloproliferative leukemia virus oncogene
2	ENSMUSG00000031402	-0.277183	-2.02213	-0.505031	Mpp1	membrane protein, palmitoylated
2	ENSMUSG00000032470	1.61014	-1.70659	0.271811	Mras	muscle and microspikes RAS
2	ENSMUSG00000022370	0.598475	-0.787127	-0.538042	Mrpl13	mitochondrial ribosomal protein L13
2	ENSMUSG00000028140	0	-1.04312	0.012883	Mrpl9	mitochondrial ribosomal protein L9
2	ENSMUSG00000064356	1.42884	-2.14629	-0.165042	mt-Atp8	mitochondrially encoded ATP synthase 8
2	ENSMUSG00000027601	1.16355	-1.31811	0.226599	Mtfr1	mitochondrial fission regulator 1
2	ENSMUSG00000016510	0.168716	-0.916859	0.517225	Mtif3	mitochondrial translational initiation factor 3
2	ENSMUSG00000029840	-0.162268	-1.3329	1.05416	Mtpn	myotrophin
2	ENSMUSG00000064342	-1.60415	-1.62431	-0.215523	mt-Ti	mitochondrially encoded tRNA isoleucine
2	ENSMUSG00000064355	-0.925165	-2.06226	-1.07656	mt-Tk	mitochondrially encoded tRNA lysine
2	ENSMUSG00000042485	0.507297	-0.946355	-0.240247	Mustn1	musculoskeletal, embryonic nuclear protein 1
2	ENSMUSG00000033004	0.451372	-1.23527	0.139909	Mycbp2	MYC binding protein 2, E3 ubiquitin protein ligase
2	ENSMUSG00000034868	0.0956764	-1.28758	0.181103	Myl12b	myosin, light chain 12B, regulatory
2	ENSMUSG00000038175	0	-1.16847	0.991039	Mylip	myosin regulatory light chain interacting protein
2	ENSMUSG00000066952	0.511268	-0.94192	-0.282135	Myo1h	myosin 1H
2	ENSMUSG00000033186	0.978305	-0.985145	-0.490613	Mzt1	mitotic spindle organizing protein 1
2	ENSMUSG00000001751	0	-1.63665	-1.27322	Naglu	alpha-N-acetylglucosaminidase (Sanfilippo disease IIIB)
2	ENSMUSG00000058799	-0.362874	-1.77529	0.170077	Nap1l1	nucleosome assembly protein 1-like 1
2	ENSMUSG00000086316	-0.445145	-1.49634	-0.082474	Nbdy	negative regulator of P-body association
2	ENSMUSG00000008690	0	-2.56144	0.136416	Ncaph2	non-SMC condensin II complex, subunit H2
2	ENSMUSG00000023009	-0.339161	-0.949504	-0.196373	Nckap5l	NCK-associated protein 5-like
2	ENSMUSG00000027678	-0.19448	-1.688	-0.426139	Ncoa3	nuclear receptor coactivator 3
2	ENSMUSG00000056234	0.598412	-2.10717	-0.529909	Ncoa4	nuclear receptor coactivator 4
2	ENSMUSG00000021908	0.630889	-2.21707	-0.526964	Ncoa4-ps	nuclear receptor coactivator 4, pseudogene
2	ENSMUSG00000038369	0.202604	-3.75497	0.228605	Ncoa6	nuclear receptor coactivator 6
2	ENSMUSG00000005125	0.108887	-1.81931	-0.249223	Ndrg1	N-myc downstream regulated gene 1
2	ENSMUSG00000029632	1.49392	-1.20031	0.969848	Ndufa4	Ndufa4, mitochondrial complex associated
2	ENSMUSG00000026393	0.341857	-1.87285	-0.228667	Nek7	NIMA (never in mitosis gene a)-related expressed kinase 7
2	ENSMUSG00000034701	0	-1.14904	-0.123638	Neurod1	neurogenic differentiation 1
2	ENSMUSG00000031902	0.0355579	-1.16405	-0.197285	Nfatc3	nuclear factor of activated T cells, cytoplasmic, calcineurin dependent 3
2	ENSMUSG00000015839	1.85422	-2.2639	1.20075	Nfe2l2	nuclear factor, erythroid derived 2, like 2
2	ENSMUSG00000028163	-0.778699	-1.11909	0.0195215	Nfkb1	nuclear factor of kappa light polypeptide gene enhancer in B cells 1, p105
2	ENSMUSG00000021025	1.66592	-2.90516	0.203334	Nfkbia	nuclear factor of kappa light polypeptide gene enhancer in B cells inhibitor, alpha
2	ENSMUSG00000032897	0.3364	-0.766067	-0.21828	Nfyc	nuclear transcription factor-Y gamma
2	ENSMUSG00000021806	0	-1.02031	0.070116	Nid2	nidogen 2
2	ENSMUSG00000037966	-0.714742	-1.42155	0.548428	Ninj1	ninjurin 1
2	ENSMUSG00000015247	-0.190618	-1.88313	0.779954	Nipsnap3b	nipsnap homolog 3B
2	ENSMUSG00000016409	0	-1.0386	0.748252	Nkap	NFKB activating protein
2	ENSMUSG00000017837	0.74118	-2.68705	-0.893829	Nkiras2	NFKB inhibitor interacting Ras-like protein 2
2	ENSMUSG00000038745	-0.0591861	-1.174	-0.515407	Nlrp6	NLR family, pyrin domain containing 6
2	ENSMUSG00000024999	0.390258	-1.13612	-0.133272	Noc3l	NOC3 like DNA replication regulator
2	ENSMUSG00000001569	0	-1.26275	0.0881509	Nom1	nucleolar protein with MIF4G domain 1
2	ENSMUSG00000031311	1.37953	-1.88945	-0.884077	Nono	non-POU-domain-containing, octamer binding protein
2	ENSMUSG00000032336	-0.109765	-1.79324	0.175318	Nptn	neuroplastin
2	ENSMUSG00000003849	0.200261	-1.00448	-1.12563	Nqo1	NAD(P)H dehydrogenase, quinone 1
2	ENSMUSG00000005897	0	-1.02705	0.272292	Nr2c1	nuclear receptor subfamily 2, group C, member 1
2	ENSMUSG00000052384	-1.29971	-1.73653	-1.50889	Nrros	negative regulator of reactive oxygen species
2	ENSMUSG00000027455	0.711855	-0.772516	0.262995	Nsfl1c	NSFL1 (p97) cofactor (p47)
2	ENSMUSG00000028245	0.758908	-1.35105	-0.521186	Nsmaf	neutral sphingomyelinase (N-SMase) activation associated factor
2	ENSMUSG00000040331	-0.339892	-0.881234	-0.000514003	Nsmce4a	NSE4 homolog A, SMC5-SMC6 complex component
2	ENSMUSG00000029780	-1.15685	-1.80498	-1.43153	Nt5c3	5'-nucleotidase, cytosolic III
2	ENSMUSG00000039480	-0.92311	-1.20922	0.889072	Nt5dc1	5'-nucleotidase domain containing 1
2	ENSMUSG00000030824	2.17766	-2.35869	0.236332	Nucb1	nucleobindin 1
2	ENSMUSG00000027306	1.5315	-3.4108	0.221634	Nusap1	nucleolar and spindle associated protein 1
2	ENSMUSG00000010097	0.74118	-1.27668	-0.939258	Nxf1	nuclear RNA export factor 1
2	ENSMUSG00000051228	-0.197065	-0.949744	0.304494	Nyx	nyctalopin
2	ENSMUSG00000029153	1.51641	-3.75345	-0.171884	Ociad2	OCIA domain containing 2
2	ENSMUSG00000025220	1.35466	-3.34923	0.375598	Oga	O-GlcNAcase
2	ENSMUSG00000085438	-1.1346	-2.41129	-0.265234	Oip5os1	Opa interacting protein 5, opposite strand 1
2	ENSMUSG00000030162	0.200261	-1.02551	-0.354665	Olr1	oxidized low density lipoprotein (lectin-like) receptor 1
2	ENSMUSG00000031214	0.150508	-1.46116	0.539963	Ophn1	oligophrenin 1
2	ENSMUSG00000038683	0.244258	-1.23226	-0.485978	Pak1ip1	PAK1 interacting protein 1
2	ENSMUSG00000022781	-1.37765	-3.98816	0.438299	Pak2	p21 (RAC1) activated kinase 2
2	ENSMUSG00000037514	0	-1.22767	-0.762303	Pank2	pantothenate kinase 2
2	ENSMUSG00000028032	1.32087	-1.12705	-0.219897	Papss1	3'-phosphoadenosine 5'-phosphosulfate synthase 1
2	ENSMUSG00000028964	0.266889	-1.01816	-0.715678	Park7	Parkinson disease (autosomal recessive, early onset) 7
2	ENSMUSG00000020072	0.168716	-0.850752	-0.0674858	Pbld2	phenazine biosynthesis-like protein domain containing 2
2	ENSMUSG00000051695	-0.395822	-3.0175	-0.511538	Pcbp1	poly(rC) binding protein 1
2	ENSMUSG00000035382	0.0146723	-1.00347	-0.808627	Pcsk7	proprotein convertase subtilisin/kexin type 7
2	ENSMUSG00000027835	1.23563	-1.50404	0.0539851	Pdcd10	programmed cell death 10
2	ENSMUSG00000053965	0.0772748	-2.42184	-1.79178	Pde5a	phosphodiesterase 5A, cGMP-specific
2	ENSMUSG00000055044	-0.247734	-1.84548	1.6094	Pdlim1	PDZ and LIM domain 1 (elfin)
2	ENSMUSG00000028273	0.359768	-2.2716	-0.487197	Pdlim5	PDZ and LIM domain 5
2	ENSMUSG00000074818	-0.559451	-1.08896	-1.00425	Pdzd7	PDZ domain containing 7
2	ENSMUSG00000092035	1.29918	-1.76447	1.2672	Peg10	paternally expressed 10
2	ENSMUSG00000021196	0.0267049	-0.804331	-0.324609	Pfkp	phosphofructokinase, platelet
2	ENSMUSG00000072501	-1.02625	-1.47837	0.266169	Phf20l1	PHD finger protein 20-like 1
2	ENSMUSG00000027088	-0.0388485	-0.880606	0.394453	Phospho2	phosphatase, orphan 2
2	ENSMUSG00000039987	-0.701073	-0.904131	-0.0272922	Phtf2	putative homeodomain transcription factor 2
2	ENSMUSG00000039361	0.890624	-1.31689	0.599736	Picalm	phosphatidylinositol binding clathrin assembly protein
2	ENSMUSG00000079469	0.443744	-2.18075	-2.39308	Pigb	phosphatidylinositol glycan anchor biosynthesis, class B
2	ENSMUSG00000026698	1.14658	-1.15002	0.244001	Pigc	phosphatidylinositol glycan anchor biosynthesis, class C
2	ENSMUSG00000056536	0.384007	-1.751	-1.58198	Pign	phosphatidylinositol glycan anchor biosynthesis, class N
2	ENSMUSG00000034614	-0.0376872	-1.79904	-0.313117	Pik3ip1	phosphoinositide-3-kinase interacting protein 1
2	ENSMUSG00000032571	-0.197065	-1.23771	-0.635342	Pik3r4	phosphoinositide-3-kinase regulatory subunit 4
2	ENSMUSG00000024014	0	-1.11519	0.749782	Pim1	proviral integration site 1
2	ENSMUSG00000028221	0	-1.1093	0.116146	Pip4p2	phosphatidylinositol-4,5-bisphosphate 4-phosphatase 2
2	ENSMUSG00000034902	0	-0.890608	0.306232	Pip5k1c	phosphatidylinositol-4-phosphate 5-kinase, type 1 gamma
2	ENSMUSG00000024851	0.42666	-1.5825	0.221305	Pitpnm1	phosphatidylinositol transfer protein, membrane-associated 1
2	ENSMUSG00000004591	0.168716	-0.814771	-0.0914265	Pkn2	protein kinase N2
2	ENSMUSG00000027999	0.830808	-1.10323	-0.264472	Pla2g12a	phospholipase A2, group XIIA
2	ENSMUSG00000031557	0.833489	-1.37909	-1.2476	Plekha2	pleckstrin homology domain-containing, family A (phosphoinositide binding specific) member 2
2	ENSMUSG00000049969	0.335985	-0.780819	0.117059	Plekhf2	pleckstrin homology domain containing, family F (with FYVE domain) member 2
2	ENSMUSG00000049493	-0.0229482	-1.53383	-0.110191	Pls1	plastin 1 (I-isoform)
2	ENSMUSG00000032372	0	-1.0042	-0.0155038	Plscr2	phospholipid scramblase 2
2	ENSMUSG00000017754	0	-0.98807	0.0457531	Pltp	phospholipid transfer protein
2	ENSMUSG00000002963	0	-1.15524	0.130234	Pnkp	polynucleotide kinase 3'- phosphatase
2	ENSMUSG00000025509	-0.533345	-3.3701	2.19468	Pnpla2	patatin-like phospholipase domain containing 2
2	ENSMUSG00000036257	-0.608226	-5.28417	-0.222723	Pnpla8	patatin-like phospholipase domain containing 8
2	ENSMUSG00000018659	1.12829	-1.91561	-2.20709	Pnpo	pyridoxine 5'-phosphate oxidase
2	ENSMUSG00000029250	0.120403	-0.888322	0.496235	Polr2b	polymerase (RNA) II (DNA directed) polypeptide B
2	ENSMUSG00000037251	1.02267	-1.81635	-0.767587	Pomk	protein-O-mannose kinase
2	ENSMUSG00000063849	0.511903	-1.34874	0.126165	Ppcdc	phosphopantothenoylcysteine decarboxylase
2	ENSMUSG00000026035	-0.190085	-2.75585	0.12835	Ppil3	peptidylprolyl isomerase (cyclophilin)-like 3
2	ENSMUSG00000037754	0.285814	-1.32826	0.819446	Ppp1r16b	protein phosphatase 1, regulatory subunit 16B
2	ENSMUSG00000026626	1.04415	-1.31196	-0.74724	Ppp2r5a	protein phosphatase 2, regulatory subunit B', alpha
2	ENSMUSG00000026753	0.0363524	-1.44943	-0.972291	Ppp6c	protein phosphatase 6, catalytic subunit
2	ENSMUSG00000052296	1.37702	-3.92375	1.31288	Ppp6r1	protein phosphatase 6, regulatory subunit 1
2	ENSMUSG00000026701	-0.0817519	-1.88447	0.895895	Prdx6	peroxiredoxin 6
2	ENSMUSG00000016257	0.672385	-2.42283	0.0703948	Prelid3b	PRELI domain containing 3B
2	ENSMUSG00000020230	0.610432	-2.02673	-0.944752	Prmt2	protein arginine N-methyltransferase 2
2	ENSMUSG00000037134	0.270525	-1.3955	-1.11412	Prmt9	protein arginine methyltransferase 9
2	ENSMUSG00000079037	1.21856	-1.56353	0.728438	Prnp	prion protein
2	ENSMUSG00000020528	-0.192669	-2.63646	-0.168765	Prpsap2	phosphoribosyl pyrophosphate synthetase-associated protein 2
2	ENSMUSG00000047040	0.387292	-1.52052	-0.750095	Prr15l	proline rich 15-like
2	ENSMUSG00000024393	0	-0.849845	-0.510979	Prrc2a	proline-rich coiled-coil 2A
2	ENSMUSG00000030465	-0.0159026	-1.54317	-0.706182	Psd3	pleckstrin and Sec7 domain containing 3
2	ENSMUSG00000019969	0	-0.869978	0.18254	Psen1	presenilin 1
2	ENSMUSG00000056412	1.10048	-0.896972	0.0943518	Psenen-ps	presenilin enhancer gamma secretase subunit, pseudogene
2	ENSMUSG00000015671	-0.57771	-2.13085	-0.471218	Psma2	proteasome subunit alpha 2
2	ENSMUSG00000060073	0.467497	-1.52154	0.22122	Psma3	proteasome subunit alpha 3
2	ENSMUSG00000027566	-0.393862	-1.08673	-0.220195	Psma7	proteasome subunit alpha 7
2	ENSMUSG00000040078	0.507567	-2.54893	-2.03528	Ptges3-ps	prostaglandin E synthase 3, pseudogene
2	ENSMUSG00000097028	0	-0.916859	0.270491	Ptgs2os	prostaglandin-endoperoxide synthase 2, opposite strand
2	ENSMUSG00000045826	-0.0432211	-0.971762	-0.562238	Ptprcap	protein tyrosine phosphatase receptor type C polypeptide-associated protein
2	ENSMUSG00000020415	0.372014	-1.04577	-1.06425	Pttg1	pituitary tumor-transforming gene 1
2	ENSMUSG00000020594	0.916241	-2.69636	-0.414645	Pum2	pumilio RNA-binding family member 2
2	ENSMUSG00000021411	1.35728	-1.55179	0.591488	Pxdc1	PX domain containing 1
2	ENSMUSG00000035781	-1.19045	-2.40466	0.00127191	R3hdm4	R3H domain containing 4
2	ENSMUSG00000077450	-0.863938	-1.48184	0.404923	Rab11b	RAB11B, member RAS oncogene family
2	ENSMUSG00000027935	0	-1.48857	0.194998	Rab13	RAB13, member RAS oncogene family
2	ENSMUSG00000020175	-0.0272068	-1.40631	1.42283	Rab36	RAB36, member RAS oncogene family
2	ENSMUSG00000070953	0	-0.923464	0	Rabepk	Rab9 effector protein with kelch motifs
2	ENSMUSG00000024096	0.358375	-1.99069	-1.32333	Ralbp1	ralA binding protein 1
2	ENSMUSG00000027593	-0.705556	-1.75297	0.278613	Raly	hnRNP-associated with lethal yellow
2	ENSMUSG00000052681	-1.01396	-1.0837	-0.632355	Rap1b	RAS related protein 1b
2	ENSMUSG00000031453	0.0138337	-1.10003	-0.0782927	Rasa3	RAS p21 protein activator 3
2	ENSMUSG00000071042	-1.37265	-1.51857	0.610988	Rasgrp3	RAS, guanyl releasing protein 3
2	ENSMUSG00000027339	0	-1.0408	0.289042	Rassf2	Ras association (RalGDS/AF-6) domain family member 2
2	ENSMUSG00000033931	0.457894	-1.22945	0.918403	Rbm34	RNA binding motif protein 34
2	ENSMUSG00000032580	0.782128	-1.07559	-0.185532	Rbm5	RNA binding motif protein 5
2	ENSMUSG00000038374	0	-1.11357	0	Rbm8a	RNA binding motif protein 8a
2	ENSMUSG00000078184	0	-0.91927	0	Rbm8a2	RNA binding motif protein 8A2
2	ENSMUSG00000022400	0.376907	-0.798554	0.242644	Rbx1	ring-box 1
2	ENSMUSG00000049832	0.141713	-1.36403	0.670816	Rbx1-ps	ring-box 1, pseudogene
2	ENSMUSG00000024785	-0.241314	-1.81632	-0.34396	Rcl1	RNA terminal phosphate cyclase-like 1
2	ENSMUSG00000074269	-0.224703	-1.51947	0.0423276	Rec114	REC114 meiotic recombination protein
2	ENSMUSG00000020752	0	-1.53995	-1.25881	Recql5	RecQ protein-like 5
2	ENSMUSG00000039852	-0.687856	-1.48174	-0.166205	Rere	arginine glutamic acid dipeptide (RE) repeats
2	ENSMUSG00000017802	0	-1.20542	1.06408	Retreg3	reticulophagy regulator family member 3
2	ENSMUSG00000043190	0.120403	-1.93624	1.3092	Rfesd	Rieske (Fe-S) domain containing
2	ENSMUSG00000020696	1.37947	-2.03668	-0.0909231	Rffl	ring finger and FYVE like domain containing protein
2	ENSMUSG00000024206	-0.680366	-1.44266	0.28652	Rfx2	regulatory factor X, 2 (influences HLA class II expression)
2	ENSMUSG00000036615	0	-0.97036	-0.0734347	Rfxap	regulatory factor X-associated protein
2	ENSMUSG00000026357	0.915233	-1.32848	-0.0894892	Rgs18	regulator of G-protein signaling 18
2	ENSMUSG00000002458	-0.393862	-2.19451	1.2166	Rgs19	regulator of G-protein signaling 19
2	ENSMUSG00000021428	0.168716	-1.32668	1.35766	Riok1	RIO kinase 1
2	ENSMUSG00000024404	0.596473	-2.74033	-0.370764	Riok3	RIO kinase 3
2	ENSMUSG00000066800	-0.570327	-1.03311	-0.997685	Rnasel	ribonuclease L (2', 5'-oligoisoadenylate synthetase-dependent)
2	ENSMUSG00000032217	0.200261	-0.875738	-0.408655	Rnf111	ring finger 111
2	ENSMUSG00000038876	0.953067	-1.5845	-1.88683	Rnf146	ring finger protein 146
2	ENSMUSG00000055850	0.426842	-3.96712	-1.84516	Rnf181	ring finger protein 181
2	ENSMUSG00000058498	1.02557	-1.4128	1.0647	Rnf207	ring finger protein 207
2	ENSMUSG00000028677	0.669977	-1.06075	0.660185	Rnf220	ring finger protein 220
2	ENSMUSG00000024290	0.476701	-1.16516	-0.350628	Rock1	Rho-associated coiled-coil containing protein kinase 1
2	ENSMUSG00000058558	0.0690418	-0.882791	0.432874	Rpl5	ribosomal protein L5
2	ENSMUSG00000067274	-1.27407	-1.72076	-1.8325	Rplp0	ribosomal protein, large, P0
2	ENSMUSG00000061983	2.57101	-2.17072	1.35898	Rps12	ribosomal protein S12
2	ENSMUSG00000078087	2.66385	-2.33868	1.01419	Rps12l1	ribosomal protein S12-like 1
2	ENSMUSG00000082481	1.42873	-1.48339	0.735334	Rps12-ps19	ribosomal protein S12, pseudogene 19
2	ENSMUSG00000098181	1.70677	-1.66787	0.076086	Rps12-ps24	ribosomal protein S12, pseudogene 24
2	ENSMUSG00000067038	2.77542	-2.2893	0.910248	Rps12-ps3	ribosomal protein S12, pseudogene 3
2	ENSMUSG00000081565	1.31169	-1.26592	0.382846	Rps12-ps5	ribosomal protein S12, pseudogene 5
2	ENSMUSG00000069862	2.02008	-1.97363	0.942149	Rps12-ps9	ribosomal protein S12, pseudogene 9
2	ENSMUSG00000008683	0.580671	-0.980099	-0.357713	Rps15a	ribosomal protein S15A
2	ENSMUSG00000067351	0.615516	-2.26198	-0.402373	Rps15a-ps2	ribosomal protein S15A, pseudogene 2
2	ENSMUSG00000080059	-0.197065	-0.954392	-0.197663	Rps19-ps3	ribosomal protein S19, pseudogene 3
2	ENSMUSG00000096699	0	-1.1226	-0.235527	Rps19-ps4	ribosomal protein S19, pseudogene 4
2	ENSMUSG00000028234	0.388253	-1.91035	-1.31208	Rps20	ribosomal protein S20
2	ENSMUSG00000059775	1.88116	-1.95371	0.840937	Rps26-ps1	ribosomal protein S26, pseudogene 1
2	ENSMUSG00000020516	1.95584	-3.08307	0.481156	Rps6kb1	ribosomal protein S6 kinase, polypeptide 1
2	ENSMUSG00000080746	-0.339161	-0.90857	-0.63172	Rpsa-ps12	ribosomal protein SA, pseudogene 12
2	ENSMUSG00000020641	0.492048	-1.46831	1.26355	Rsad2	radical S-adenosyl methionine domain containing 2
2	ENSMUSG00000050079	-0.696521	-2.24637	0.237888	Rspry1	ring finger and SPRY domain containing 1
2	ENSMUSG00000035629	-0.234176	-2.16328	0.259093	Rubcn	RUN domain and cysteine-rich domain containing, Beclin 1-interacting protein
2	ENSMUSG00000039153	-0.823331	-1.06961	-0.256223	Runx2	runt related transcription factor 2
2	ENSMUSG00000044080	-0.18684	-1.1281	0.571637	S100a1	S100 calcium binding protein A1
2	ENSMUSG00000079003	0.665661	-1.62651	1.31568	Samd1	sterile alpha motif domain containing 1
2	ENSMUSG00000021963	-0.705831	-0.925685	0.0684814	Sap18	Sin3-associated polypeptide 18
2	ENSMUSG00000023927	-0.357451	-3.21113	2.1123	Satb1	special AT-rich sequence binding protein 1
2	ENSMUSG00000024516	1.00366	-0.929502	0.675998	Sec11c	SEC11 homolog C, signal peptidase complex subunit
2	ENSMUSG00000030298	0.821761	-1.76631	-1.07774	Sec13	SEC13 homolog, nuclear pore and COPII coat complex component
2	ENSMUSG00000019802	-0.195922	-1.91156	0.214964	Sec63	SEC63 homolog, protein translocation regulator
2	ENSMUSG00000020964	1.34507	-1.10741	0.385392	Sel1l	sel-1 suppressor of lin-12-like (C. elegans)
2	ENSMUSG00000064373	1.12493	-0.88077	0.162579	Selenop	selenoprotein P
2	ENSMUSG00000075700	-1.37787	-1.79339	-0.214163	Selenot	selenoprotein T
2	ENSMUSG00000041571	0.382114	-1.7843	-1.53022	Selenow	selenoprotein W
2	ENSMUSG00000026276	-1.12166	-1.24777	-0.74764	Septin2	septin 2
2	ENSMUSG00000060147	0.872895	-2.12467	0.00217536	Serpinb6a	serine (or cysteine) peptidase inhibitor, clade B, member 6a
2	ENSMUSG00000054766	0.726749	-1.12756	-0.48092	Set	SET nuclear oncogene
2	ENSMUSG00000025982	0.915593	-2.14322	2.27256	Sf3b1	splicing factor 3b, subunit 1
2	ENSMUSG00000047281	0	-0.796973	-0.0691156	Sfn	stratifin
2	ENSMUSG00000025066	-0.195922	-1.27251	0.357718	Sfr1	SWI5 dependent recombination repair 1
2	ENSMUSG00000037062	2.15984	-2.04549	0.794253	Sh3glb1	SH3-domain GRB2-like B1 (endophilin)
2	ENSMUSG00000026860	0.120403	-1.26385	0.0658413	Sh3glb2	SH3-domain GRB2-like endophilin B2
2	ENSMUSG00000001942	0.347826	-2.2695	0.530696	Siae	sialic acid acetylesterase
2	ENSMUSG00000022696	0.873197	-1.15841	0.377984	Sidt1	SID1 transmembrane family, member 1
2	ENSMUSG00000061559	-1.35117	-1.36523	-0.665679	Skic8	SKI8 subunit of superkiller complex
2	ENSMUSG00000015314	0	-1.07119	-0.443149	Slamf6	SLAM family member 6
2	ENSMUSG00000045775	0.620509	-1.41658	0.272937	Slc16a5	solute carrier family 16 (monocarboxylic acid transporters), member 5
2	ENSMUSG00000001918	1.20183	-4.63892	1.07287	Slc1a5	solute carrier family 1 (neutral amino acid transporter), member 5
2	ENSMUSG00000032602	1.01522	-1.15771	0.614203	Slc25a20	solute carrier family 25 (mitochondrial carnitine/acylcarnitine translocase), member 20
2	ENSMUSG00000037434	0.579741	-1.51863	0.178122	Slc30a1	solute carrier family 30 (zinc transporter), member 1
2	ENSMUSG00000054414	-0.142827	-0.878802	0.121098	Slc30a7	solute carrier family 30 (zinc transporter), member 7
2	ENSMUSG00000027957	0.168716	-2.29017	-0.0755905	Slc35a3	solute carrier family 35 (UDP-N-acetylglucosamine (UDP-GlcNAc) transporter), member 3
2	ENSMUSG00000022462	0.234846	-1.00687	-1.17945	Slc38a2	solute carrier family 38, member 2
2	ENSMUSG00000025993	0	-1.0435	0.605472	Slc40a1	solute carrier family 40 (iron-regulated transporter), member 1
2	ENSMUSG00000039463	1.19029	-0.916365	-0.69301	Slc9a8	solute carrier family 9 (sodium/hydrogen exchanger), member 8
2	ENSMUSG00000039738	0.809329	-1.0149	-0.0396711	Slx4	SLX4 structure-specific endonuclease subunit homolog (S. cerevisiae)
2	ENSMUSG00000025369	-0.392987	-1.8304	-0.173114	Smarcc2	SWI/SNF related, matrix associated, actin dependent regulator of chromatin, subfamily c, member 2
2	ENSMUSG00000022452	-0.666335	-1.68423	0.0368762	Smdt1	single-pass membrane protein with aspartate rich tail 1
2	ENSMUSG00000045709	0.200261	-0.946254	-0.327971	Smkr-ps	smal lysine rich protein 1, pseudogene
2	ENSMUSG00000028409	0.232619	-1.12095	0.286325	Smu1	smu-1 suppressor of mec-8 and unc-52 homolog (C. elegans)
2	ENSMUSG00000006058	-0.6352	-2.17881	-1.19878	Snf8	SNF8, ESCRT-II complex subunit, homolog (S. cerevisiae)
2	ENSMUSG00000003660	0.379463	-1.99608	0.711995	Snrnp200	small nuclear ribonucleoprotein 200 (U5)
2	ENSMUSG00000040767	0.168716	-0.851228	0.0398592	Snrnp25	small nuclear ribonucleoprotein 25 (U11/U12)
2	ENSMUSG00000027404	2.39742	-2.07726	0.0665816	Snrpb	small nuclear ribonucleoprotein B
2	ENSMUSG00000057278	0.128284	-1.49187	1.50176	Snrpg	small nuclear ribonucleoprotein polypeptide G
2	ENSMUSG00000038301	0.656062	-1.51281	1.54857	Snx10	sorting nexin 10
2	ENSMUSG00000028385	0.867937	-0.693005	-0.307388	Snx30	sorting nexin family member 30
2	ENSMUSG00000022982	-0.426239	-2.40449	1.07964	Sod1	superoxide dismutase 1, soluble
2	ENSMUSG00000025323	0.647553	-0.85224	-0.570782	Sp4	trans-acting transcription factor 4
2	ENSMUSG00000020859	0.275472	-1.18252	-0.421118	Spag9	sperm associated antigen 9
2	ENSMUSG00000021917	-0.324341	-1.74814	1.31168	Spcs1	signal peptidase complex subunit 1 homolog (S. cerevisiae)
2	ENSMUSG00000033396	0.120403	-1.27594	-0.120934	Spg11	SPG11, spatacsin vesicle trafficking associated
2	ENSMUSG00000000738	-0.397958	-1.02535	-0.957102	Spg7	SPG7, paraplegin matrix AAA peptidase subunit
2	ENSMUSG00000057342	-0.00731311	-2.66262	-0.163402	Sphk2	sphingosine kinase 2
2	ENSMUSG00000043065	0.619414	-2.145	0.945077	Spice1	spindle and centriole associated protein 1
2	ENSMUSG00000057522	-1.42948	-3.22235	-0.430982	Spop	speckle-type BTB/POZ protein
2	ENSMUSG00000049516	0.230812	-1.22371	-1.22474	Spty2d1	SPT2 chromatin protein domain containing 1
2	ENSMUSG00000022463	0	-1.16819	-0.194714	Srebf2	sterol regulatory element binding factor 2
2	ENSMUSG00000003161	-1.19107	-2.47281	0.733868	Sri	sorcin
2	ENSMUSG00000028676	0	-1.41884	-1.03186	Srsf10	serine and arginine-rich splicing factor 10
2	ENSMUSG00000003992	0	-1.59573	-0.640465	Ssbp2	single-stranded DNA binding protein 2
2	ENSMUSG00000056091	0.453186	-2.75884	0.26965	St3gal5	ST3 beta-galactoside alpha-2,3-sialyltransferase 5
2	ENSMUSG00000022747	0.941441	-0.933954	0.454825	St3gal6	ST3 beta-galactoside alpha-2,3-sialyltransferase 6
2	ENSMUSG00000037286	-0.893912	-2.05646	-0.806974	Stag1	stromal antigen 1
2	ENSMUSG00000027367	0	-0.868672	0.187063	Stard7	START domain containing 7
2	ENSMUSG00000020919	0.912874	-1.11286	0.667894	Stat5b	signal transducer and activator of transcription 5B
2	ENSMUSG00000026880	-0.722869	-2.4885	-0.45329	Stom	stomatin
2	ENSMUSG00000020961	1.41914	-2.53627	0.0674542	Ston2	stonin 2
2	ENSMUSG00000032116	0.209012	-1.97134	-1.00213	Stt3a	STT3, subunit of the oligosaccharyltransferase complex, homolog A (S. cerevisiae)
2	ENSMUSG00000028879	0	-0.983288	-0.0779504	Stx12	syntaxin 12
2	ENSMUSG00000010110	-0.0283494	-1.20051	0.363499	Stx5a	syntaxin 5A
2	ENSMUSG00000019998	0.829128	-2.98907	-0.200786	Stx7	syntaxin 7
2	ENSMUSG00000042524	0.545258	-1.59818	-0.187003	Sun2	Sad1 and UNC84 domain containing 2
2	ENSMUSG00000014867	-0.240487	-1.143	-0.982103	Surf4	surfeit gene 4
2	ENSMUSG00000039231	0.851878	-1.5028	-0.607189	Suv39h1	suppressor of variegation 3-9 1
2	ENSMUSG00000028643	0.168716	-1.0308	-0.413448	Svbp	small vasohibin binding protein
2	ENSMUSG00000096054	0.869281	-1.6522	-0.149414	Syne1	spectrin repeat containing, nuclear envelope 1
2	ENSMUSG00000022415	0	-1.13449	0.136521	Syngr1	synaptogyrin 1
2	ENSMUSG00000045503	0.677734	-0.735364	0.0832842	Sys1	SYS1 Golgi-localized integral membrane protein homolog (S. cerevisiae)
2	ENSMUSG00000015755	1.32611	-1.25427	-0.367787	Tab2	TGF-beta activated kinase 1/MAP3K7 binding protein 2
2	ENSMUSG00000043866	0.823589	-1.97495	0.555692	Taf10	TATA-box binding protein associated factor 10
2	ENSMUSG00000013539	-0.619906	-1.72315	0.497519	Tango2	transport and golgi organization 2
2	ENSMUSG00000017291	0.127588	-0.832148	-0.587394	Taok1	TAO kinase 1
2	ENSMUSG00000025058	-0.197065	-1.36511	-0.361543	Tasl	TLR adaptor interacting with endolysosomal SLC15A4
2	ENSMUSG00000033799	0.815448	-0.828799	0.50061	Tasor2	transcription activation suppressor family member 2
2	ENSMUSG00000040158	-1.04669	-1.38094	0.0652911	Tax1bp3	Tax1 (human T cell leukemia virus type I) binding protein 3
2	ENSMUSG00000071359	0.66055	-1.22798	1.29304	Tbpl1	TATA box binding protein-like 1
2	ENSMUSG00000029925	1.62406	-2.03419	-0.808278	Tbxas1	thromboxane A synthase 1, platelet
2	ENSMUSG00000067869	0	-1.16626	-0.702991	Tcea1-ps1	transcription elongation factor A (SII) 1, pseudogene 1
2	ENSMUSG00000001472	2.13274	-3.21385	-2.16774	Tcf25	transcription factor 25 (basic helix-loop-helix)
2	ENSMUSG00000020034	-2.2596	-3.40786	3.10154	Tcp11l2	t-complex 11 (mouse) like 2
2	ENSMUSG00000039461	0.963154	-1.05027	-1.14695	Tcta	T cell leukemia translocation altered gene
2	ENSMUSG00000036779	1.26331	-3.3849	0.126652	Tent4b	terminal nucleotidyltransferase 4B
2	ENSMUSG00000029552	-0.321732	-1.62209	-0.707272	Tes	testin LIM domain protein
2	ENSMUSG00000029553	-0.259769	-1.72334	0.778349	Tfec	transcription factor EC
2	ENSMUSG00000002603	0.876435	-1.46298	-0.625734	Tgfb1	transforming growth factor, beta 1
2	ENSMUSG00000025872	-0.0627551	-0.98834	-0.0334707	Thoc3	THO complex 3
2	ENSMUSG00000046591	0	-1.06989	-0.459173	Ticrr	TOPBP1-interacting checkpoint and replication regulator
2	ENSMUSG00000033191	0.580781	-1.79383	0.898213	Tie1	tyrosine kinase with immunoglobulin-like and EGF-like domains 1
2	ENSMUSG00000089847	0.168716	-1.06204	0	Timm10b	translocase of inner mitochondrial membrane 10B
2	ENSMUSG00000017466	0.610109	-1.18424	0.1059	Timp2	tissue inhibitor of metalloproteinase 2
2	ENSMUSG00000035824	1.40188	-1.30447	0.56863	Tk2	thymidine kinase 2, mitochondrial
2	ENSMUSG00000044827	0.796412	-0.98807	0.404999	Tlr1	toll-like receptor 1
2	ENSMUSG00000020023	0.791825	-1.57966	1.13992	Tmcc3	transmembrane and coiled coil domains 3
2	ENSMUSG00000055912	-0.15135	-3.14335	-1.73007	Tmem150a	transmembrane protein 150A
2	ENSMUSG00000068732	-0.0396008	-1.11766	-1.35165	Tmem167b	transmembrane protein 167B
2	ENSMUSG00000026519	0	-1.07271	-0.470828	Tmem63a	transmembrane protein 63a
2	ENSMUSG00000048174	0	-0.893813	-0.464655	Tmem81	transmembrane protein 81
2	ENSMUSG00000033808	0.619747	-1.27692	0.0405526	Tmem87a	transmembrane protein 87A
2	ENSMUSG00000014353	0.390258	-0.759933	-0.321283	Tmem87b	transmembrane protein 87B
2	ENSMUSG00000024793	-0.234176	-1.77068	-1.03267	Tnfrsf25	tumor necrosis factor receptor superfamily, member 25
2	ENSMUSG00000020400	0.335985	-0.842984	-0.0396607	Tnip1	TNFAIP3 interacting protein 1
2	ENSMUSG00000026414	0.406951	-1.41485	-0.550125	Tnnt2	troponin T2, cardiac
2	ENSMUSG00000047888	-0.35836	-2.86992	-1.37589	Tnrc6b	trinucleotide repeat containing 6b
2	ENSMUSG00000000827	-0.448634	-1.1631	-0.850887	Tpd52l2	tumor protein D52-like 2
2	ENSMUSG00000032366	0.423053	-1.08956	-0.880825	Tpm1	tropomyosin 1, alpha
2	ENSMUSG00000084319	-0.0143931	-0.966	-0.610181	Tpt1-ps3	tumor protein, translationally-controlled, pseudogene 3
2	ENSMUSG00000084284	-0.403373	-0.985358	-0.698805	Tpt1-ps6	tumor protein, translationally-controlled, pseudogene 6
2	ENSMUSG00000076928	0.149545	-1.4668	-0.377012	Trac	T cell receptor alpha constant
2	ENSMUSG00000034292	-0.197065	-1.3212	0.905896	Traf3ip1	TRAF3 interacting protein 1
2	ENSMUSG00000017386	-0.457834	-0.995399	-0.240381	Traf4	TNF receptor associated factor 4
2	ENSMUSG00000005981	0	-1.35527	0.348791	Trap1	TNF receptor-associated protein 1
2	ENSMUSG00000076498	0.0742191	-1.45597	-1.11787	Trbc2	T cell receptor beta, constant 2
2	ENSMUSG00000076870	1.46268	-2.10336	-0.174391	Trdj1	T cell receptor delta joining 1
2	ENSMUSG00000076871	-0.225146	-1.74846	-0.797866	Trdj2	T cell receptor delta joining 2
2	ENSMUSG00000051682	0.235796	-1.2195	0.39593	Treml4	triggering receptor expressed on myeloid cells-like 4
2	ENSMUSG00000051675	0	-1.18736	-0.127467	Trim32	tripartite motif-containing 32
2	ENSMUSG00000060441	0.266889	-1.48131	-0.528044	Trim5	tripartite motif-containing 5
2	ENSMUSG00000021188	1.14535	-2.38025	0.99938	Trip11	thyroid hormone receptor interactor 11
2	ENSMUSG00000032386	2.13296	-2.14799	-0.782345	Trip4	thyroid hormone receptor interactor 4
2	ENSMUSG00000053286	0.266889	-0.853562	-0.598553	Trmt1l	tRNA methyltransferase 1 like
2	ENSMUSG00000026510	0.74118	-1.0408	-0.559099	Trp53bp2	transformation related protein 53 binding protein 2
2	ENSMUSG00000056579	0.413646	-2.98992	-0.363751	Tug1	taurine upregulated gene 1
2	ENSMUSG00000020087	0	-0.857469	0.124453	Tysnd1	trypsin domain containing 1
2	ENSMUSG00000036352	2.0081	-2.97368	-1.06351	Ubac1	ubiquitin associated domain containing 1
2	ENSMUSG00000028437	-1.02626	-2.43071	1.0931	Ubap1	ubiquitin-associated protein 1
2	ENSMUSG00000028277	1.4087	-3.93438	1.63075	Ube2j1	ubiquitin-conjugating enzyme E2J 1
2	ENSMUSG00000027078	1.3787	-1.18253	-0.489787	Ube2l6	ubiquitin-conjugating enzyme E2L 6
2	ENSMUSG00000028381	0.192032	-1.32388	0.0907463	Ugcg	UDP-glucose ceramide glucosyltransferase
2	ENSMUSG00000037470	-0.562016	-1.25848	0.545118	Uggt1	UDP-glucose glycoprotein glucosyltransferase 1
2	ENSMUSG00000022814	0	-1.4405	-0.983286	Umps	uridine monophosphate synthetase
2	ENSMUSG00000020163	0.430768	-1.8641	0.485448	Uqcr11	ubiquinol-cytochrome c reductase, complex III subunit XI
2	ENSMUSG00000038250	0.462811	-1.92343	-1.93336	Usp38	ubiquitin specific peptidase 38
2	ENSMUSG00000054814	0	-0.965115	-0.378694	Usp46	ubiquitin specific peptidase 46
2	ENSMUSG00000028907	0	-1.36327	-0.535453	Utp11	UTP11 small subunit processome component
2	ENSMUSG00000028955	0.254592	-1.78948	1.53117	Vamp3	vesicle-associated membrane protein 3
2	ENSMUSG00000027860	-0.0677427	-2.03713	-0.367474	Vangl1	VANGL planar cell polarity 1
2	ENSMUSG00000007029	0	-1.05828	0.700903	Vars	valyl-tRNA synthetase
2	ENSMUSG00000018377	1.80196	-1.51431	-0.495349	Vezf1	vascular endothelial zinc finger 1
2	ENSMUSG00000021038	0.237167	-1.30689	0.508843	Vipas39	VPS33B interacting protein, apical-basolateral polarity regulator, spe-39 homolog
2	ENSMUSG00000073131	0.617293	-0.734815	-0.410906	Vma21	VMA21 vacuolar H+-ATPase homolog (S. cerevisiae)
2	ENSMUSG00000029462	-0.938577	-1.59336	-1.01408	Vps29	VPS29 retromer complex component
2	ENSMUSG00000031479	0	-0.901357	0.263191	Vps36	vacuolar protein sorting 36
2	ENSMUSG00000031165	1.0073	-1.21573	-1.52709	Was	Wiskott-Aldrich syndrome
2	ENSMUSG00000047731	0.894955	-0.788372	0.433057	Wbp1l	WW domain binding protein 1 like
2	ENSMUSG00000022023	0.390258	-0.84479	-0.0738745	Wbp4	WW domain binding protein 4
2	ENSMUSG00000031166	1.35968	-3.45444	1.63405	Wdr13	WD repeat domain 13
2	ENSMUSG00000021147	-1.29103	-1.27312	-0.684893	Wdr37	WD repeat domain 37
2	ENSMUSG00000075284	0.199823	-1.03	-1.18012	Wipf1	WAS/WASL interacting protein family, member 1
2	ENSMUSG00000029364	0	-0.809184	-0.259169	Wsb2	WD repeat and SOCS box-containing 2
2	ENSMUSG00000041058	-0.985534	-0.974174	-0.312035	Wwp1	WW domain containing E3 ubiquitin protein ligase 1
2	ENSMUSG00000060509	1.0303	-1.79329	0.910976	Xcr1	chemokine (C motif) receptor 1
2	ENSMUSG00000025860	0.782783	-1.58565	-1.74789	Xiap	X-linked inhibitor of apoptosis
2	ENSMUSG00000022100	2.05557	-2.3128	1.90265	Xpo7	exportin 7
2	ENSMUSG00000028639	-0.0470959	-2.22527	1.1729	Ybx1	Y box protein 1
2	ENSMUSG00000030189	2.34044	-3.21572	-1.34526	Ybx3	Y box protein 3
2	ENSMUSG00000057375	0.200261	-0.993967	-1.21507	Yipf1	Yip1 domain family, member 1
2	ENSMUSG00000018326	2.0421	-2.34206	0.140196	Ywhab	tyrosine 3-monooxygenase/tryptophan 5-monooxygenase activation protein, beta polypeptide
2	ENSMUSG00000018965	1.01195	-1.36985	-0.397496	Ywhah	tyrosine 3-monooxygenase/tryptophan 5-monooxygenase activation protein, eta polypeptide
2	ENSMUSG00000006310	-0.0694173	-2.062	-0.287763	Zbtb32	zinc finger and BTB domain containing 32
2	ENSMUSG00000028042	0	-0.853562	0.194698	Zbtb7b	zinc finger and BTB domain containing 7B
2	ENSMUSG00000021012	0.361458	-1.57227	1.0651	Zc3h14	zinc finger CCCH type containing 14
2	ENSMUSG00000029826	-1.05542	-1.75145	-0.675964	Zc3hav1	zinc finger CCCH type, antiviral 1
2	ENSMUSG00000031823	-0.69883	-1.61204	0.146802	Zdhhc7	zinc finger, DHHC domain containing 7
2	ENSMUSG00000060397	-0.563799	-1.11883	-0.196373	Zfp128	zinc finger protein 128
2	ENSMUSG00000028799	0.832259	-1.04431	0.759202	Zfp362	zinc finger protein 362
2	ENSMUSG00000045817	0.520538	-0.832332	-0.37213	Zfp36l2	zinc finger protein 36, C3H type-like 2
2	ENSMUSG00000014198	0	-2.09227	-0.320726	Zfp385c	zinc finger protein 385C
2	ENSMUSG00000042197	1.4583	-1.56144	1.53078	Zfp451	zinc finger protein 451
2	ENSMUSG00000045519	0.857956	-1.34569	-1.24496	Zfp560	zinc finger protein 560
2	ENSMUSG00000052713	0	-0.905728	-0.225775	Zfp608	zinc finger protein 608
2	ENSMUSG00000049606	-0.253538	-1.0925	-0.535419	Zfp644	zinc finger protein 644
2	ENSMUSG00000054893	-0.195922	-1.41817	-0.990641	Zfp667	zinc finger protein 667
2	ENSMUSG00000062116	0	-1.19779	0.444297	Zfp954	zinc finger protein 954
2	ENSMUSG00000041164	0.168716	-1.50794	0.175987	Zmiz2	zinc finger, MIZ-type containing 2
2	ENSMUSG00000042446	0.281039	-1.12788	1.11165	Zmym4	zinc finger, MYM-type 4
2	ENSMUSG00000058446	0.378588	-1.84603	-1.44291	Znrf2	zinc and ring finger 2
2	ENSMUSG00000029386	-0.972986	-0.966947	-0.383593	No assciated gene
2	ENSMUSG00000051412	0.453029	-0.856047	-0.400225	No assciated gene
2	ENSMUSG00000062808	0.637644	-1.54988	-1.16868	No assciated gene
2	ENSMUSG00000067833	0	-1.68738	0.036202	No assciated gene
2	ENSMUSG00000076137	0.644695	-0.84961	-0.577345	No assciated gene
2	ENSMUSG00000076258	1.48238	-1.71152	-1.14747	No assciated gene
2	ENSMUSG00000076281	1.10023	-1.61501	-0.802152	No assciated gene
2	ENSMUSG00000081123	0.307985	-1.71112	0.00796353	No assciated gene
2	ENSMUSG00000082331	0.946414	-2.88115	-0.121852	No assciated gene
2	ENSMUSG00000082466	0.266889	-0.890306	0.136521	No assciated gene
2	ENSMUSG00000082880	0.352525	-2.17659	-0.135112	No assciated gene
2	ENSMUSG00000084005	0.946414	-2.65879	0.0315607	No assciated gene
2	ENSMUSG00000084156	0.235796	-1.89511	0	No assciated gene
2	ENSMUSG00000088246	1.00573	-1.38045	-1.16385	No assciated gene
2	ENSMUSG00000088609	1.13707	-1.66993	-0.936953	No assciated gene
2	ENSMUSG00000088819	0	-0.777375	-0.36835	No assciated gene
2	ENSMUSG00000089365	-0.205566	-1.96425	1.43546	No assciated gene
2	ENSMUSG00000089855	0.245911	-1.5604	-0.495671	No assciated gene
2	ENSMUSG00000091044	-0.699794	-1.04372	0.335173	No assciated gene
2	ENSMUSG00000093282	1.01092	-0.951587	-0.857613	No assciated gene
2	ENSMUSG00000094518	-0.457955	-1.87357	-0.648927	No assciated gene
2	ENSMUSG00000094614	0.618695	-1.83918	-0.617812	No assciated gene
2	ENSMUSG00000095124	-0.644224	-1.14558	0.378939	No assciated gene
2	ENSMUSG00000095343	0.634665	-1.18539	-1.38317	No assciated gene
2	ENSMUSG00000096789	0.640036	-1.67915	-0.418363	No assciated gene
2	ENSMUSG00000097033	0.120403	-1.08943	-0.0274648	No assciated gene
2	ENSMUSG00000097142	0.168716	-1.13041	-0.260733	No assciated gene
2	ENSMUSG00000097263	0.18424	-2.58922	-0.476228	No assciated gene
2	ENSMUSG00000097731	0.79038	-1.83683	0.779659	No assciated gene
2	ENSMUSG00000097867	0.531951	-0.923793	0.588166	No assciated gene
2	ENSMUSG00000097889	2.11691	-1.84809	-1.3898	No assciated gene
2	ENSMUSG00000097978	-1.01579	-1.2599	0.860336	No assciated gene
2	ENSMUSG00000098281	0	-0.819362	-0.13594	No assciated gene
3	ENSMUSG00000097290	-0.133756	1.13518	-0.356206	1300002E11Rik	RIKEN cDNA 1300002E11 gene
3	ENSMUSG00000085077	0.902271	1.51753	-0.0221424	1700049E15Rik	RIKEN cDNA 1700049E15 gene
3	ENSMUSG00000044148	0.168716	1.87073	-0.309732	1810030O07Rik	RIKEN cDNA 1810030O07 gene
3	ENSMUSG00000027713	0	1.15292	-0.505712	1810062G17Rik	RIKEN cDNA 1810062G17 gene
3	ENSMUSG00000036873	0	1.04469	-0.0115953	2410004B18Rik	RIKEN cDNA 2410004B18 gene
3	ENSMUSG00000034601	0.168716	0.895533	-0.374924	2700049A03Rik	RIKEN cDNA 2700049A03 gene
3	ENSMUSG00000053553	0	1.39625	0.946735	3110082I17Rik	RIKEN cDNA 3110082I17 gene
3	ENSMUSG00000087017	-1.09397	1.95793	-0.159132	4930417H01Rik	RIKEN cDNA 4930417H01 gene
3	ENSMUSG00000060029	0.929759	1.18064	-0.958961	4930473A02Rik	RIKEN cDNA 4930473A02 gene
3	ENSMUSG00000087478	-1.21571	1.88574	-0.82699	4930506C21Rik	RIKEN cDNA 4930506C21 gene
3	ENSMUSG00000050702	0	0.916786	-0.0734347	4930563M21Rik	RIKEN cDNA 4930563M21 gene
3	ENSMUSG00000070315	-0.0495598	2.0049	-1.57546	4930581F22Rik	RIKEN cDNA 4930581F22 gene
3	ENSMUSG00000086009	0	1.19143	0.21779	4930587A21Rik	RIKEN cDNA 4930587A21 gene
3	ENSMUSG00000084234	0.74118	1.0199	0.168078	4933405O20Rik	RIKEN cDNA 4933405O20 gene
3	ENSMUSG00000086978	0	1.02128	-0.216031	4933435F18Rik	RIKEN cDNA 4933435F18 gene
3	ENSMUSG00000072893	0	0.938157	0.140615	4933439C10Rik	RIKEN cDNA 4933439C10 gene
3	ENSMUSG00000087670	0	1.24891	0	9530036M11Rik	RIKEN cDNA 9530036M11 gene
3	ENSMUSG00000097825	0	1.11012	0.166673	9630001P10Rik	RIKEN cDNA 9630001P10 gene
3	ENSMUSG00000079144	0.74118	0.8357	-0.632257	A130010J15Rik	RIKEN cDNA A130010J15 gene
3	ENSMUSG00000052595	0.997877	1.01984	0.0591289	A1cf	APOBEC1 complementation factor
3	ENSMUSG00000072109	2.13519	2.52699	-0.511915	A530040E14Rik	RIKEN cDNA A530040E14 gene
3	ENSMUSG00000085649	0	0.774385	-0.0906631	A730032A03Rik	RIKEN cDNA A730032A03 gene
3	ENSMUSG00000070609	0	1.06854	0.3072	Aadacl4	arylacetamide deacetylase like 4
3	ENSMUSG00000057880	0.120403	1.44221	-0.291935	Abat	4-aminobutyrate aminotransferase
3	ENSMUSG00000040136	0.0422889	1.055	-0.299306	Abcc8	ATP-binding cassette, sub-family C (CFTR/MRP), member 8
3	ENSMUSG00000030249	1.02107	1.1231	0.697767	Abcc9	ATP-binding cassette, sub-family C (CFTR/MRP), member 9
3	ENSMUSG00000032131	1.07717	1.23344	-0.388969	Abcg4	ATP binding cassette subfamily G member 4
3	ENSMUSG00000003346	0	0.87878	0	Abhd17a	abhydrolase domain containing 17A
3	ENSMUSG00000025085	0.630727	1.96967	1.55114	Ablim1	actin-binding LIM protein 1
3	ENSMUSG00000078453	0	1.12635	0.168078	Abracl	ABRA C-terminal like
3	ENSMUSG00000020532	1.24588	1.6477	0.330271	Acaca	acetyl-Coenzyme A carboxylase alpha
3	ENSMUSG00000029456	0.101809	1.32712	-0.833051	Acad10	acyl-Coenzyme A dehydrogenase family, member 10
3	ENSMUSG00000062480	0.8801	1.3478	0.648067	Acat3	acetyl-Coenzyme A acetyltransferase 3
3	ENSMUSG00000020681	0	1.39239	-0.382291	Ace	angiotensin I converting enzyme (peptidyl-dipeptidase A) 1
3	ENSMUSG00000030760	0.266889	0.886314	-0.372087	Acer3	alkaline ceramidase 3
3	ENSMUSG00000020917	-0.130222	2.02156	-1.06646	Acly	ATP citrate lyase
3	ENSMUSG00000018796	-0.0506854	2.91217	1.4854	Acsl1	acyl-CoA synthetase long-chain family member 1
3	ENSMUSG00000055194	0	0.955071	-0.196268	Actbl2	actin, beta-like 2
3	ENSMUSG00000054808	0.284365	2.33434	-0.471392	Actn4	actinin alpha 4
3	ENSMUSG00000026341	0.183735	1.18485	-0.126561	Actr3	ARP3 actin-related protein 3
3	ENSMUSG00000054693	-0.522103	1.37312	0.202267	Adam10	a disintegrin and metallopeptidase domain 10
3	ENSMUSG00000027951	-0.291893	1.85645	-0.0740102	Adar	adenosine deaminase, RNA-specific
3	ENSMUSG00000020262	0.977962	0.992171	0.26326	Adarb1	adenosine deaminase, RNA-specific, B1
3	ENSMUSG00000029106	-1.50646	2.84712	-0.417995	Add1	adducin 1 (alpha)
3	ENSMUSG00000025026	-0.0507308	1.68181	0.081538	Add3	adducin 3 (gamma)
3	ENSMUSG00000056492	0.74118	1.20462	0.270795	Adgrf5	adhesion G protein-coupled receptor F5
3	ENSMUSG00000027335	0	1.01851	0	Adra1d	adrenergic receptor, alpha 1d
3	ENSMUSG00000015961	0	1.74217	1.10917	Adss	adenylosuccinate synthetase, non muscle
3	ENSMUSG00000029094	0	1.76873	0.0981947	Afap1	actin filament associated protein 1
3	ENSMUSG00000068036	-0.900406	1.8576	0.396323	Afdn	afadin, adherens junction formation factor
3	ENSMUSG00000049470	1.11559	1.08266	-0.743714	Aff4	AF4/FMR2 family, member 4
3	ENSMUSG00000031967	0	1.17073	0.0870586	Afg3l1	AFG3-like AAA ATPase 1
3	ENSMUSG00000036698	0.0810516	1.61605	0.530252	Ago2	argonaute RISC catalytic subunit 2
3	ENSMUSG00000041936	0	1.30536	-0.442448	Agrn	agrin
3	ENSMUSG00000090086	0.569578	1.72658	0.460306	AI480526	expressed sequence AI480526
3	ENSMUSG00000019806	0.670494	0.824447	-0.412095	Aig1	androgen-induced 1
3	ENSMUSG00000024847	0.873713	1.3467	-1.12371	Aip	aryl-hydrocarbon receptor-interacting protein
3	ENSMUSG00000066406	1.11634	1.4936	-1.29374	Akap13	A kinase (PRKA) anchor protein 13
3	ENSMUSG00000059708	0.74118	1.77215	-0.516085	Akap17b	A kinase (PRKA) anchor protein 17B
3	ENSMUSG00000039166	-0.311543	1.07906	0.135771	Akap7	A kinase (PRKA) anchor protein 7
3	ENSMUSG00000023075	0.483258	1.01412	-0.906089	Akirin1	akirin 1
3	ENSMUSG00000039158	-0.6369	2.20635	-0.69519	Akna	AT-hook transcription factor
3	ENSMUSG00000039427	0	1.05877	-0.0241195	Alg1	asparagine-linked glycosylation 1 (beta-1,4-mannosyltransferase)
3	ENSMUSG00000039740	0.838223	0.901491	-0.0661391	Alg2	asparagine-linked glycosylation 2 (alpha-1,3-mannosyltransferase)
3	ENSMUSG00000079036	0.584278	2.16932	-0.619587	Alkbh1	alkB homolog 1, histone H2A dioxygenase
3	ENSMUSG00000048218	0.168716	1.04235	0.108275	Amigo2	adhesion molecule with Ig like domain 2
3	ENSMUSG00000050022	0	1.41255	0.300432	Amz1	archaelysin family metallopeptidase 1
3	ENSMUSG00000014355	0.614778	1.37962	-0.851791	Anapc1	anaphase promoting complex subunit 1
3	ENSMUSG00000020107	-0.0766619	1.1219	0.536297	Anapc16	anaphase promoting complex subunit 16
3	ENSMUSG00000035569	0.522632	2.41075	-2.14898	Ankrd11	ankyrin repeat domain 11
3	ENSMUSG00000039988	0	0.942585	0.471054	Ankrd13c	ankyrin repeat domain 13c
3	ENSMUSG00000032249	0.0734174	1.09842	-0.465356	Anp32a	acidic (leucine-rich) nuclear phosphoprotein 32 family, member A
3	ENSMUSG00000021866	0.22211	1.38196	-0.0607206	Anxa11	annexin A11
3	ENSMUSG00000018340	0	0.78331	-0.120655	Anxa6	annexin A6
3	ENSMUSG00000015702	1.01147	3.17761	-1.2395	Anxa9	annexin A9
3	ENSMUSG00000021322	0	0.845572	0.168746	Aoah	acyloxyacyl hydrolase
3	ENSMUSG00000039215	-0.709472	1.61806	0	Aoc1l3	amine oxidase copper containing 1-like 3
3	ENSMUSG00000019326	0	1.05667	-0.173774	Aoc3	amine oxidase, copper containing 3
3	ENSMUSG00000035960	0.168716	0.767535	-0.0568915	Apex1	apurinic/apyrimidinic endonuclease 1
3	ENSMUSG00000025269	1.12028	1.40864	-0.0123392	Apex2	apurinic/apyrimidinic endonuclease 2
3	ENSMUSG00000032204	1.44999	2.12906	-0.850032	Aqp9	aquaporin 9
3	ENSMUSG00000024451	0.266889	0.881568	-0.18722	Arap3	ArfGAP with RhoGAP domain, ankyrin repeat and PH domain 3
3	ENSMUSG00000021877	0.595618	1.24051	0.272818	Arf4	ADP-ribosylation factor 4
3	ENSMUSG00000020440	0.554636	0.725262	-0.158194	Arf5	ADP-ribosylation factor 5
3	ENSMUSG00000030881	0	0.918004	-0.485155	Arfip2	ADP-ribosylation factor interacting protein 2
3	ENSMUSG00000037148	1.31505	1.55618	-0.96359	Arhgap10	Rho GTPase activating protein 10
3	ENSMUSG00000024043	-0.0755193	1.01787	-0.514901	Arhgap28	Rho GTPase activating protein 28
3	ENSMUSG00000048865	0.218652	1.46161	-1.19694	Arhgap30	Rho GTPase activating protein 30
3	ENSMUSG00000054901	0	1.04983	0.451498	Arhgef33	Rho guanine nucleotide exchange factor (GEF) 33
3	ENSMUSG00000031133	-1.98006	3.58661	-0.0925767	Arhgef6	Rac/Cdc42 guanine nucleotide exchange factor (GEF) 6
3	ENSMUSG00000048118	0	1.40759	-0.460951	Arid4a	AT rich interactive domain 4A (RBP1-like)
3	ENSMUSG00000031776	0.478377	2.87633	0.12432	Arl2bp	ADP-ribosylation factor-like 2 binding protein
3	ENSMUSG00000038352	-0.0272068	0.840466	-0.284684	Arl5c	ADP-ribosylation factor-like 5C
3	ENSMUSG00000026960	-0.723575	1.27309	0.17203	Arl6ip6	ADP-ribosylation factor-like 6 interacting protein 6
3	ENSMUSG00000027599	0.390258	1.15201	0.437654	Armc1	armadillo repeat containing 1
3	ENSMUSG00000033460	-0.395586	1.31584	0.00280225	Armcx1	armadillo repeat containing, X-linked 1
3	ENSMUSG00000029465	0.359736	2.83739	0.284653	Arpc3	actin related protein 2/3 complex, subunit 3
3	ENSMUSG00000060216	-0.178897	2.07841	-0.820308	Arrb2	arrestin, beta 2
3	ENSMUSG00000042082	1.37783	1.79498	0.200148	Arsb	arylsulfatase B
3	ENSMUSG00000024887	0.74118	1.14213	0.352471	Asah2	N-acylsphingosine amidohydrolase 2
3	ENSMUSG00000038204	0	1.02126	0.367297	Asb10	ankyrin repeat and SOCS box-containing 10
3	ENSMUSG00000030509	0	1.02385	-0.328186	Asb7	ankyrin repeat and SOCS box-containing 7
3	ENSMUSG00000029036	0	0.883204	0.322069	Atad3a	ATPase family, AAA domain containing 3A
3	ENSMUSG00000030850	0	0.767767	-0.259343	Ate1	arginyltransferase 1
3	ENSMUSG00000047767	0.827957	2.2667	0.173786	Atg16l2	autophagy related 16-like 2 (S. cerevisiae)
3	ENSMUSG00000079418	0.419592	1.69976	1.12095	Atg4a	autophagy related 4A, cysteine peptidase
3	ENSMUSG00000059811	-0.395586	1.63607	0.950444	Atl2	atlastin GTPase 2
3	ENSMUSG00000032412	-0.67326	2.34857	-0.762188	Atp1b3	ATPase, Na+/K+ transporting, beta 3 polypeptide
3	ENSMUSG00000020788	2.33522	3.00917	-0.947224	Atp2a3	ATPase, Ca++ transporting, ubiquitous
3	ENSMUSG00000032570	-1.10054	1.63942	-0.808006	Atp2c1	ATPase, Ca++-sequestering
3	ENSMUSG00000034566	-0.431241	1.84891	0.25375	Atp5h	ATP synthase, H+ transporting, mitochondrial F0 complex, subunit D
3	ENSMUSG00000038690	-0.144357	1.52187	-0.114958	Atp5j2	ATP synthase, H+ transporting, mitochondrial F0 complex, subunit F2
3	ENSMUSG00000019302	0.341887	0.808392	-0.481414	Atp6v0a1	ATPase, H+ transporting, lysosomal V0 subunit A1
3	ENSMUSG00000022295	1.52074	2.23227	-0.252865	Atp6v1c1	ATPase, H+ transporting, lysosomal V1 subunit C1
3	ENSMUSG00000037685	0.256648	3.0834	0.239404	Atp8a1	ATPase, aminophospholipid transporter (APLT), class I, type 8A, member 1
3	ENSMUSG00000075010	0.120403	1.00479	-0.295691	AW112010	expressed sequence AW112010
3	ENSMUSG00000039285	-0.479372	1.62692	0.74656	Azi2	5-azacytidine induced gene 2
3	ENSMUSG00000052423	0.352525	1.0199	-0.105561	B4galt3	UDP-Gal:betaGlcNAc beta 1,4-galactosyltransferase, polypeptide 3
3	ENSMUSG00000040270	-0.652335	1.53394	-1.04587	Bach2	BTB and CNC homology, basic leucine zipper transcription factor 2
3	ENSMUSG00000026987	0.80009	1.49364	0.115393	Baz2b	bromodomain adjacent to zinc finger domain, 2B
3	ENSMUSG00000084957	-0.322269	1.39483	-0.689085	Bbip1	BBSome interacting protein 1
3	ENSMUSG00000026851	0.168716	1.19884	-0.655729	BC005624	cDNA sequence BC005624
3	ENSMUSG00000033722	0.74118	0.849734	-0.265331	BC034090	cDNA sequence BC034090
3	ENSMUSG00000028191	0.534842	1.05026	-0.267498	Bcl10	B cell leukemia/lymphoma 10
3	ENSMUSG00000007659	1.52591	3.176	0.246132	Bcl2l1	BCL2-like 1
3	ENSMUSG00000089682	0.74118	1.27482	-0.148678	Bcl2l2	BCL2-like 2
3	ENSMUSG00000031872	1.58901	4.51443	-2.13853	Bean1	brain expressed, associated with Nedd4, 1
3	ENSMUSG00000020169	0	1.18633	0	Best3	bestrophin 3
3	ENSMUSG00000087330	0.74118	0.933024	0	Bloodlinc	Bloodlinc, erythroid developmental long intergenic non-protein coding transcript
3	ENSMUSG00000037270	1.48643	1.85818	-0.535273	Bltp1	bridge-like lipid transfer protein family member 1
3	ENSMUSG00000040093	0.909896	1.33024	0.217931	Bmf	BCL2 modifying factor
3	ENSMUSG00000040481	-0.591151	2.70944	-2.34401	Bptf	bromodomain PHD finger transcription factor
3	ENSMUSG00000029458	0.23766	0.951862	-0.521839	Brap	BRCA1 associated protein
3	ENSMUSG00000001632	0	1.40828	0.44193	Brpf1	bromodomain and PHD finger containing, 1
3	ENSMUSG00000063952	0.168716	1.69653	0.909133	Brpf3	bromodomain and PHD finger containing, 3
3	ENSMUSG00000036478	1.6759	1.83793	-1.23862	Btg1	BTG anti-proliferation factor 1
3	ENSMUSG00000020423	2.0869	2.28525	0.052279	Btg2	BTG anti-proliferation factor 2
3	ENSMUSG00000052013	-0.160665	2.40428	-1.83827	Btla	B and T lymphocyte associated
3	ENSMUSG00000051223	-0.53429	2.11211	-0.171474	Bzw1	basic leucine zipper and W2 domains 1
3	ENSMUSG00000097365	1.28092	1.91187	0.526569	C030034L19Rik	RIKEN cDNA C030034L19 gene
3	ENSMUSG00000015451	0.266889	1.00675	0.40001	C4a	complement component 4A (Rodgers blood group)
3	ENSMUSG00000073418	0.266889	1.19657	-0.0561952	C4b	complement component 4B (Chido blood group)
3	ENSMUSG00000033417	0.193193	1.3413	0.173802	Cacul1	CDK2 associated, cullin domain 1
3	ENSMUSG00000001175	1.13817	1.41015	0.34065	Calm1	calmodulin 1
3	ENSMUSG00000053819	0.829964	1.48789	0.884566	Camk2d	calcium/calmodulin-dependent protein kinase II, delta
3	ENSMUSG00000056737	0	1.34064	-0.377584	Capg	capping protein (actin filament), gelsolin-like
3	ENSMUSG00000054083	-0.365457	2.07609	-0.994152	Capn12	calpain 12
3	ENSMUSG00000035547	-0.65374	2.40905	-0.257081	Capn5	calpain 5
3	ENSMUSG00000037960	-0.821906	1.19875	-0.165181	Card19	caspase recruitment domain family, member 19
3	ENSMUSG00000008393	0.263479	1.51286	-0.95697	Carhsp1	calcium regulated heat stable protein 1
3	ENSMUSG00000010755	0.206066	1.09717	-0.897667	Cars	cysteinyl-tRNA synthetase
3	ENSMUSG00000056228	1.18173	1.28616	0.311118	Cars2	cysteinyl-tRNA synthetase 2 (mitochondrial)(putative)
3	ENSMUSG00000033597	0.531951	1.73462	-1.15664	Caskin1	CASK interacting protein 1
3	ENSMUSG00000029863	-0.144357	1.19073	-0.963914	Casp2	caspase 2
3	ENSMUSG00000027997	-1.53498	2.70876	0.32711	Casp6	caspase 6
3	ENSMUSG00000038498	0	0.826112	-0.153413	Catsper1	cation channel, sperm associated 1
3	ENSMUSG00000045954	-0.477962	1.50091	-0.430191	Cavin2	caveolae associated 2
3	ENSMUSG00000006362	0	1.16139	-0.35836	Cbfa2t3	CBFA2/RUNX1 translocation partner 3
3	ENSMUSG00000031885	-0.0283494	1.98678	-0.795338	Cbfb	core binding factor beta
3	ENSMUSG00000018666	0	0.910495	-0.176826	Cbx1	chromobox 1
3	ENSMUSG00000029836	-0.977728	1.40075	-0.809997	Cbx3	chromobox 3
3	ENSMUSG00000057886	-1.0738	1.3224	-0.446502	Cbx3-ps6	chromobox 3, pseudogene 6
3	ENSMUSG00000009575	0.120403	0.775552	-0.135112	Cbx5	chromobox 5
3	ENSMUSG00000053411	0.374224	1.45098	-0.366592	Cbx7	chromobox 7
3	ENSMUSG00000072722	0	0.893775	-0.180742	Ccdc121rt2	coiled-coil domain containing 121, retrogene 2
3	ENSMUSG00000019767	1.0303	1.05521	-0.0065606	Ccdc170	coiled-coil domain containing 170
3	ENSMUSG00000038127	0.68001	2.62561	0.0281735	Ccdc50	coiled-coil domain containing 50
3	ENSMUSG00000032740	-0.0279569	2.93741	0.3413	Ccdc88a	coiled coil domain containing 88A
3	ENSMUSG00000018927	0.0709661	2.12059	-0.485122	Ccl6	chemokine (C-C motif) ligand 6
3	ENSMUSG00000000184	-1.10514	3.50154	0.216486	Ccnd2	cyclin D2
3	ENSMUSG00000029385	-1.373	1.87735	0.370836	Ccng2	cyclin G2
3	ENSMUSG00000001416	-1.15624	1.50165	-1.28165	Cct3	chaperonin containing Tcp1, subunit 3 (gamma)
3	ENSMUSG00000022234	0	1.27018	-0.91849	Cct5	chaperonin containing Tcp1, subunit 5 (epsilon)
3	ENSMUSG00000047139	0.303	0.937231	0.513862	Cd24a	CD24a antigen
3	ENSMUSG00000026012	-0.22767	0.997898	-0.0236879	Cd28	CD28 antigen
3	ENSMUSG00000042502	0.168716	2.28467	-1.15184	Cd2bp2	CD2 cytoplasmic tail binding protein 2
3	ENSMUSG00000048498	0.168716	0.841145	-0.361543	Cd300e	CD300E molecule
3	ENSMUSG00000060703	-0.592826	0.829195	-0.220195	Cd302	CD302 antigen
3	ENSMUSG00000015355	0.748127	1.78109	-0.489834	Cd48	CD48 antigen
3	ENSMUSG00000040747	0.492894	1.52018	-0.701827	Cd53	CD53 antigen
3	ENSMUSG00000003379	-0.234176	1.0391	0	Cd79a	CD79A antigen (immunoglobulin-associated alpha)
3	ENSMUSG00000027435	0	1.32715	-0.0207651	Cd93	CD93 antigen
3	ENSMUSG00000035776	-0.0190632	1.44317	0.95062	Cd99l2	CD99 antigen-like 2
3	ENSMUSG00000024370	0	1.7253	0.41051	Cdc23	CDC23 cell division cycle 23
3	ENSMUSG00000020687	0.266889	0.994645	-0.353577	Cdc27	cell division cycle 27
3	ENSMUSG00000038446	0	1.09568	-0.0598502	Cdc40	cell division cycle 40
3	ENSMUSG00000036533	0.397088	2.01121	1.0095	Cdc42ep3	CDC42 effector protein (Rho GTPase binding) 3
3	ENSMUSG00000063838	0.152227	2.61336	-0.837929	Cdc42ep5	CDC42 effector protein (Rho GTPase binding) 5
3	ENSMUSG00000052298	0.992616	1.56906	0.0378751	Cdc42se2	CDC42 small effector 2
3	ENSMUSG00000000028	0	1.12498	-0.2788	Cdc45	cell division cycle 45
3	ENSMUSG00000048922	0.368977	1.14466	0.321471	Cdca2	cell division cycle associated 2
3	ENSMUSG00000039298	0.504701	0.849734	-0.297268	Cdk5rap2	CDK5 regulatory subunit associated protein 2
3	ENSMUSG00000040274	0	1.0708	-0.196373	Cdk6	cyclin dependent kinase 6
3	ENSMUSG00000058793	0.595527	2.9446	1.11253	Cds2	CDP-diacylglycerol synthase (phosphatidate cytidylyltransferase) 2
3	ENSMUSG00000016028	0.980341	1.35068	0.332245	Celsr1	cadherin, EGF LAG seven-pass G-type receptor 1
3	ENSMUSG00000043923	0	1.19481	0.109562	Cenatac	centrosomal AT-AC splicing factor
3	ENSMUSG00000072825	0	1.02368	0.358459	Cep170b	centrosomal protein 170B
3	ENSMUSG00000033671	-0.225146	2.80002	-0.548102	Cep350	centrosomal protein 350
3	ENSMUSG00000056267	1.51513	1.71602	0.117341	Cep70	centrosomal protein 70
3	ENSMUSG00000037443	0.915589	1.73707	-1.21076	Cep85	centrosomal protein 85
3	ENSMUSG00000015714	-0.433778	1.05041	-0.597616	Cers2	ceramide synthase 2
3	ENSMUSG00000031796	0.540035	0.871242	-0.224425	Cfap20	cilia and flagella associated protein 20
3	ENSMUSG00000026546	0	1.00709	0.417925	Cfap45	cilia and flagella associated protein 45
3	ENSMUSG00000026365	0.878629	1.07816	-0.741864	Cfh	complement component factor h
3	ENSMUSG00000062929	0.912493	1.01911	-0.0328456	Cfl2	cofilin 2, muscle
3	ENSMUSG00000001128	0	1.39098	-0.417057	Cfp	complement factor properdin
3	ENSMUSG00000020309	1.7677	2.13966	0.578087	Chac2	ChaC, cation transport regulator 2
3	ENSMUSG00000070493	0.4196	1.25356	0.187813	Chchd2	coiled-coil-helix-coiled-coil-helix domain containing 2
3	ENSMUSG00000018474	0	1.43104	-0.0908947	Chd3	chromodomain helicase DNA binding protein 3
3	ENSMUSG00000064246	0	1.16262	-0.547663	Chil1	chitinase-like 1
3	ENSMUSG00000040809	0	2.46402	-0.744402	Chil3	chitinase-like 3
3	ENSMUSG00000063779	0	1.0559	-0.304407	Chil4	chitinase-like 4
3	ENSMUSG00000053119	-0.817762	2.23949	1.16479	Chmp3	charged multivesicular body protein 3
3	ENSMUSG00000032997	0	0.998671	0	Chpf	chondroitin polymerizing factor
3	ENSMUSG00000030732	0	0.816618	0	Chrdl2	chordin-like 2
3	ENSMUSG00000034612	0.243761	0.964829	-0.29921	Chst11	carbohydrate sulfotransferase 11
3	ENSMUSG00000057337	0	1.09782	-0.122144	Chst3	carbohydrate sulfotransferase 3
3	ENSMUSG00000032640	0.168716	2.16132	-0.265331	Chsy1	chondroitin sulfate synthase 1
3	ENSMUSG00000001017	-0.291975	4.3179	0.186289	Chtop	chromatin target of PRMT1
3	ENSMUSG00000025199	-0.889396	1.34279	-0.869958	Chuk	conserved helix-loop-helix ubiquitous kinase
3	ENSMUSG00000031879	-0.195922	1.43715	0.0766567	Ciao2b	cytosolic iron-sulfur assembly component 2B
3	ENSMUSG00000055811	0	1.0759	-0.632247	Cldn17	claudin 17
3	ENSMUSG00000068663	0.0732604	1.0368	0.0729294	Clec16a	C-type lectin domain family 16, member A
3	ENSMUSG00000074491	0.168716	1.21321	0.703016	Clec4g	C-type lectin domain family 4, member g
3	ENSMUSG00000026034	0.471394	3.25243	-0.893902	Clk1	CDC-like kinase 1
3	ENSMUSG00000021610	-0.325364	1.14856	0.248169	Clptm1l	CLPTM1-like
3	ENSMUSG00000032434	-1.14558	1.52481	-1.09379	Cmtm6	CKLF-like MARVEL transmembrane domain containing 6
3	ENSMUSG00000038085	0.894707	1.48127	0.13802	Cnbd2	cyclic nucleotide binding domain containing 2
3	ENSMUSG00000025658	1.04784	1.09106	-0.908025	Cnksr2	connector enhancer of kinase suppressor of Ras 2
3	ENSMUSG00000020362	-0.78312	1.40583	-0.430449	Cnot6	CCR4-NOT transcription complex, subunit 6
3	ENSMUSG00000034724	0.788103	1.32191	-0.207842	Cnot6l	CCR4-NOT transcription complex, subunit 6-like
3	ENSMUSG00000020173	0	1.15455	0.404665	Cobl	cordon-bleu WH2 repeat
3	ENSMUSG00000018661	-1.676	2.05755	-1.12569	Cog1	component of oligomeric golgi complex 1
3	ENSMUSG00000027742	0.74118	2.02338	-0.73443	Cog6	component of oligomeric golgi complex 6
3	ENSMUSG00000028197	0	1.10393	-0.692724	Col24a1	collagen, type XXIV, alpha 1
3	ENSMUSG00000031503	0	1.05223	-0.148268	Col4a2	collagen, type IV, alpha 2
3	ENSMUSG00000032458	0.390258	1.26117	0.165302	Copb2	coatomer protein complex, subunit beta 2 (beta prime)
3	ENSMUSG00000025607	1.53282	2.79546	-0.535542	Copg2	coatomer protein complex, subunit gamma 2
3	ENSMUSG00000031827	0.725287	1.48654	-1.08936	Cotl1	coactosin-like 1 (Dictyostelium)
3	ENSMUSG00000023020	-0.311543	1.25092	0.435357	Cox14	cytochrome c oxidase assembly protein 14
3	ENSMUSG00000091803	0.185049	1.34673	-0.546802	Cox16	cytochrome c oxidase assembly protein 16
3	ENSMUSG00000039801	0.168716	1.34154	-0.48135	Cplane1	ciliogenesis and planar polarity effector 1
3	ENSMUSG00000034796	0.352525	1.70103	1.20005	Cpne7	copine VII
3	ENSMUSG00000026616	0.0327124	0.897478	0.26843	Cr2	complement receptor 2
3	ENSMUSG00000005362	-0.0766619	1.46971	-0.670562	Crbn	cereblon
3	ENSMUSG00000027938	0	0.829195	0.21779	Creb3l4	cAMP responsive element binding protein 3-like 4
3	ENSMUSG00000022521	0.471394	1.10446	0.595189	Crebbp	CREB binding protein
3	ENSMUSG00000051451	-0.950031	1.69262	-1.10407	Crebzf	CREB/ATF bZIP transcription factor
3	ENSMUSG00000040713	-0.120589	1.7433	0.252286	Creg1	cellular repressor of E1A-stimulated genes 1
3	ENSMUSG00000029352	0	1.18278	0.0267249	Crybb3	crystallin, beta B3
3	ENSMUSG00000005683	0.120403	1.30113	-0.200378	Cs	citrate synthase
3	ENSMUSG00000024621	0.507004	1.21534	-0.341631	Csf1r	colony stimulating factor 1 receptor
3	ENSMUSG00000032312	-0.596121	1.05306	-0.738095	Csk	c-src tyrosine kinase
3	ENSMUSG00000060924	0.224413	1.22921	0.146488	Csmd1	CUB and Sushi multiple domains 1
3	ENSMUSG00000025162	1.24152	1.24869	0.957464	Csnk1d	casein kinase 1, delta
3	ENSMUSG00000073563	0.55733	0.759477	-0.30218	Csnk1g3	casein kinase 1, gamma 3
3	ENSMUSG00000024387	-0.780003	1.38494	-1.2922	Csnk2b	casein kinase 2, beta polypeptide
3	ENSMUSG00000021763	0.74118	1.32926	-0.266171	Cspg4b	chondroitin sulfate proteoglycan 4B
3	ENSMUSG00000044647	-0.361717	1.73598	-1.1731	Csrnp3	cysteine-serine-rich nuclear protein 3
3	ENSMUSG00000026421	-0.707229	1.58501	0.0087123	Csrp1	cysteine and glycine-rich protein 1
3	ENSMUSG00000027447	1.25116	2.79027	1.24503	Cst3	cystatin C
3	ENSMUSG00000028189	1.05635	1.53768	-0.302337	Ctbs	chitobiase
3	ENSMUSG00000026176	0.725465	1.39146	0.188885	Ctdsp1	CTD (carboxy-terminal domain, RNA polymerase II, polypeptide A) small phosphatase 1
3	ENSMUSG00000038816	0	0.87878	-0.559152	Ctnnal1	catenin (cadherin associated protein), alpha-like 1
3	ENSMUSG00000038642	0.70719	1.71117	-0.708191	Ctss	cathepsin S
3	ENSMUSG00000062127	0	1.65877	-0.127467	Cttnbp2nl	CTTNBP2 N-terminal like
3	ENSMUSG00000018378	1.23018	1.76244	0.203272	Cuedc1	CUE domain containing 1
3	ENSMUSG00000029705	1.7507	2.24588	-0.00492624	Cux1	cut-like homeobox 1
[truncated: 37,018 more rows]

## Sheet: Cluster 1
Gene ID	Day 4	Day 7	Day 35	Gene Symbol	Gene name
ENSMUSG00000050799	-5.40392	-1.51528	2.79656	H2bc1	H2B clustered histone 1
ENSMUSG00000031328	-5.16712	2.60972	0.47409	Flna	filamin, alpha
ENSMUSG00000027312	-4.43039	-1.80285	-1.49699	Atrn	attractin
ENSMUSG00000030403	-4.40798	1.73743	0.080131	Vasp	vasodilator-stimulated phosphoprotein
ENSMUSG00000047181	-4.21272	-2.82162	-2.1642	Samd14	sterile alpha motif domain containing 14
ENSMUSG00000083833	-4.20637	1.41024	-0.0158361	Gm13841	predicted gene 13841
ENSMUSG00000036377	-4.13716	-0.0089793	-0.101095	Cracd	capping protein inhibiting regulator of actin
ENSMUSG00000033059	-4.09621	1.19406	-0.528749	Pygb	brain glycogen phosphorylase
ENSMUSG00000053110	-3.94229	0.250694	0.979209	Yap1	yes-associated protein 1
ENSMUSG00000082399	-3.88423	1.18535	-0.0472819	Gm14036	predicted gene 14036
ENSMUSG00000026094	-3.80132	2.95964	-1.04095	Stk17b	serine/threonine kinase 17b (apoptosis-inducing)
ENSMUSG00000022438	-3.73201	-0.205934	-2.3881	Parvb	parvin, beta
ENSMUSG00000060450	-3.66492	-1.70948	-0.637509	Rnf14	ring finger protein 14
ENSMUSG00000069300	-3.65034	-0.937222	2.15971	H2bc11	H2B clustered histone 11
ENSMUSG00000059040	-3.64458	1.69333	-1.99265	Eno1b	enolase 1B, retrotransposed
ENSMUSG00000059456	-3.63516	-3.32884	-0.741133	Ptk2b	PTK2 protein tyrosine kinase 2 beta
ENSMUSG00000025314	-3.62883	0.170836	0.470942	Ptprj	protein tyrosine phosphatase receptor type J
ENSMUSG00000058385	-3.61121	-1.53931	0.697124	H2bc8	H2B clustered histone 8
ENSMUSG00000036501	-3.59234	-0.987677	-1.83548	Fam13b	family with sequence similarity 13, member B
ENSMUSG00000024677	-3.56285	2.54434	0.313912	Ms4a6b	membrane-spanning 4-domains, subfamily A, member 6B
ENSMUSG00000000194	-3.55872	1.69265	-1.44954	Gpr107	G protein-coupled receptor 107
ENSMUSG00000031824	-3.55462	0.321129	-0.0766712	6430548M08Rik	RIKEN cDNA 6430548M08 gene
ENSMUSG00000004897	-3.55437	-0.192965	-0.357203	Hdgf	heparin binding growth factor
ENSMUSG00000064193	-3.55189	1.61768	-2.20739	Gm4735	predicted gene 4735
ENSMUSG00000068854	-3.52043	0.259375	1.15203	H2bc21	H2B clustered histone 21
ENSMUSG00000092341	-3.50664	0.0383544	-2.68339	Malat1	metastasis associated lung adenocarcinoma transcript 1 (non-coding RNA)
ENSMUSG00000036225	-3.45793	1.69877	1.38214	Kctd1	potassium channel tetramerisation domain containing 1
ENSMUSG00000001525	-3.44375	0.930645	-0.428196	Tubb5	tubulin, beta 5 class I
ENSMUSG00000063524	-3.44058	2.22828	-2.43271	Eno1	enolase 1, alpha non-neuron
ENSMUSG00000047867	-3.41637	2.80916	-0.121418	Gimap6	GTPase, IMAP family member 6
ENSMUSG00000021096	-3.4045	1.57565	0.843767	Ppm1a	protein phosphatase 1A, magnesium dependent, alpha isoform
ENSMUSG00000079523	-3.39666	2.87097	-1.31901	Tmsb10	thymosin beta 10
ENSMUSG00000075031	-3.36298	-0.545562	0.0122942	H2bc3	H2B clustered histone 3
ENSMUSG00000047819	-3.35659	0.0810263	-0.0932578	Tigd4	tigger transposable element derived 4
ENSMUSG00000014503	-3.31252	-2.1475	-2.96717	Pkd2l2	polycystic kidney disease 2-like 2
ENSMUSG00000007812	-3.31165	-0.511966	-2.17151	Zfp655	zinc finger protein 655
ENSMUSG00000036371	-3.23926	-0.108074	-0.963021	Serbp1	serpine1 mRNA binding protein 1
ENSMUSG00000009907	-3.23727	-0.319265	-1.114	Vps4b	vacuolar protein sorting 4B
ENSMUSG00000017288	-3.23514	0.739951	-0.411235	Vps53	VPS53 GARP complex subunit
ENSMUSG00000018102	-3.2107	-0.230286	1.74419	H2bc4	H2B clustered histone 4
ENSMUSG00000058603	-3.20495	-0.288859	1.98181	Rpl28-ps1	ribosomal protein L28, pseudogene 1
ENSMUSG00000094497	-3.20257	0.799346	0.329224	Gm8210	predicted pseudogene 8210
ENSMUSG00000014077	-3.12753	1.42476	0.779757	Chp1	calcineurin-like EF hand protein 1
ENSMUSG00000054871	-3.12296	-0.909879	0.246183	Tmem158	transmembrane protein 158
ENSMUSG00000046034	-3.10149	1.65007	-0.0612323	Otulin	OTU deubiquitinase with linear linkage specificity
ENSMUSG00000039849	-3.09595	0.473651	0.317373	Pcif1	phosphorylated CTD interacting factor 1
ENSMUSG00000064168	-2.99381	-0.108134	0.964057	No assciated gene
ENSMUSG00000031314	-2.98911	-0.187542	-0.332483	Taf1	TATA-box binding protein associated factor 1
ENSMUSG00000016756	-2.97696	0.582221	-2.59312	Cmah	cytidine monophospho-N-acetylneuraminic acid hydroxylase
ENSMUSG00000074748	-2.97286	1.5015	2.34762	Atxn7l3b	ataxin 7-like 3B
ENSMUSG00000031532	-2.96534	1.60308	0.140383	Saraf	store-operated calcium entry-associated regulatory factor
ENSMUSG00000063739	-2.94057	1.25376	-0.468341	Gm4963	predicted gene 4963
ENSMUSG00000037553	-2.89422	0.185283	0.403174	Zdhhc18	zinc finger, DHHC domain containing 18
ENSMUSG00000010376	-2.88539	-2.82273	1.00827	Nedd8	neural precursor cell expressed, developmentally down-regulated gene 8
ENSMUSG00000093594	-2.88108	0.953025	0.576642	Gm20707	predicted gene 20707
ENSMUSG00000057193	-2.87229	0.113456	2.07862	Slc44a2	solute carrier family 44, member 2
ENSMUSG00000016256	-2.86634	1.11917	0.615005	Ctsz	cathepsin Z
ENSMUSG00000001870	-2.86557	0.482922	-0.00062461	Ltbp1	latent transforming growth factor beta binding protein 1
ENSMUSG00000021127	-2.85846	-0.11001	-0.334964	Zfp36l1	zinc finger protein 36, C3H type-like 1
ENSMUSG00000001151	-2.84995	-0.143065	1.49462	Pcnt	pericentrin (kendrin)
ENSMUSG00000009549	-2.84898	2.07167	-0.491298	Srp14	signal recognition particle 14
ENSMUSG00000000142	-2.84001	0.424007	1.58028	Axin2	axin 2
ENSMUSG00000069308	-2.83613	-1.0864	1.73103	H2bc22	H2B clustered histone 22
ENSMUSG00000025702	-2.83024	0.732829	0.853426	Marchf8	membrane associated ring-CH-type finger 8
ENSMUSG00000026568	-2.82934	1.39862	0.912533	Mpc2	mitochondrial pyruvate carrier 2
ENSMUSG00000074813	-2.82572	-1.15433	-0.549895	Morrbid	myeloid RNA regulator of BCL2L11 induced cell death
ENSMUSG00000097417	-2.81141	0.284232	-0.312963	No assciated gene
ENSMUSG00000022427	-2.79274	1.51814	-1.61979	Tomm22	translocase of outer mitochondrial membrane 22
ENSMUSG00000005881	-2.79125	0.332976	-0.0587697	Ergic3	ERGIC and golgi 3
ENSMUSG00000019054	-2.77909	1.31065	1.37925	Fis1	fission, mitochondrial 1
ENSMUSG00000059495	-2.72192	-0.690235	-0.919259	Arhgef12	Rho guanine nucleotide exchange factor (GEF) 12
ENSMUSG00000020152	-2.72034	-1.75976	1.8982	Actr2	ARP2 actin-related protein 2
ENSMUSG00000042121	-2.71832	2.38176	1.91832	Ssh1	slingshot protein phosphatase 1
ENSMUSG00000026201	-2.71258	0.498446	1.3566	Stk16	serine/threonine kinase 16
ENSMUSG00000021519	-2.70266	-0.650215	-1.62149	Mterf3	mitochondrial transcription termination factor 3
ENSMUSG00000039031	-2.69679	0.556519	0.742965	Arhgap18	Rho GTPase activating protein 18
ENSMUSG00000026554	-2.67043	0.105988	2.11728	Dcaf8	DDB1 and CUL4 associated factor 8
ENSMUSG00000022517	-2.66352	0.89293	1.30101	Mgrn1	mahogunin, ring finger 1
ENSMUSG00000026027	-2.65081	-1.3814	-0.94303	Stradb	STE20-related kinase adaptor beta
ENSMUSG00000096712	-2.63839	0.827101	-0.329604	Gm15454	predicted gene 15454
ENSMUSG00000016559	-2.63563	1.60829	-0.8232	H3f3b	H3.3 histone B
ENSMUSG00000062078	-2.59667	-1.29307	0.863469	Qki	quaking, KH domain containing RNA binding
ENSMUSG00000021906	-2.59557	-0.844326	-0.0851379	Oxnad1	oxidoreductase NAD-binding domain containing 1
ENSMUSG00000037253	-2.59543	-1.05206	-0.0865224	Mex3c	mex3 RNA binding family member C
ENSMUSG00000039611	-2.59457	-0.669589	-0.376325	Pgap4	post-GPI attachment to proteins GalNAc transferase 4
ENSMUSG00000048251	-2.59403	0.502424	1.05327	Bcl11b	B cell leukemia/lymphoma 11B
ENSMUSG00000040188	-2.58642	-0.92191	0.0971573	Scamp2	secretory carrier membrane protein 2
ENSMUSG00000031950	-2.57389	-2.16729	-1.04639	Gabarapl2	gamma-aminobutyric acid (GABA) A receptor-associated protein-like 2
ENSMUSG00000031010	-2.56317	1.92462	2.152	Usp9x	ubiquitin specific peptidase 9, X chromosome
ENSMUSG00000037720	-2.54277	2.10367	1.00318	Tmem33	transmembrane protein 33
ENSMUSG00000044258	-2.53705	-0.214583	0.0065024	Ctla2a	cytotoxic T lymphocyte-associated protein 2 alpha
ENSMUSG00000069268	-2.53419	0.330583	0.776873	H2bc7	H2B clustered histone 7
ENSMUSG00000016637	-2.53093	-0.995849	-0.123643	Ift27	intraflagellar transport 27
ENSMUSG00000001687	-2.52536	2.23295	0.260626	Ubl3	ubiquitin-like 3
ENSMUSG00000026889	-2.51726	-1.4688	-0.200928	Rbm18	RNA binding motif protein 18
ENSMUSG00000006333	-2.51513	0.0257912	0.474218	Rps9	ribosomal protein S9
ENSMUSG00000079962	-2.51408	0.71885	-0.317345	Gm12643	predicted gene 12643
ENSMUSG00000024826	-2.51298	-0.325373	0.304908	Dpf2	double PHD fingers 2
ENSMUSG00000038495	-2.51229	1.29677	1.10455	Otud7b	OTU domain containing 7B
ENSMUSG00000034343	-2.50467	-0.183281	0.128364	Ube2f	ubiquitin-conjugating enzyme E2F (putative)
ENSMUSG00000018481	-2.50003	-0.541925	-0.23279	Appbp2	amyloid beta precursor protein (cytoplasmic tail) binding protein 2
ENSMUSG00000054312	-2.49159	0.647698	0.113095	Mrps21	mitochondrial ribosomal protein S21
ENSMUSG00000028656	-2.48458	-0.335329	0.956947	Cap1	CAP, adenylate cyclase-associated protein 1 (yeast)
ENSMUSG00000029030	-2.48375	-0.307045	-0.0370519	Tprgl	transformation related protein 63 regulated like
ENSMUSG00000027506	-2.48257	-0.248167	-0.785938	Tpd52	tumor protein D52
ENSMUSG00000086869	-2.4776	0.466678	-0.257613	No assciated gene
ENSMUSG00000029580	-2.47514	-1.35037	0.645999	Actb	actin, beta
ENSMUSG00000061461	-2.47155	0.675887	-0.0101373	Smim20	small integral membrane protein 20
ENSMUSG00000025580	-2.46791	-0.540015	-1.69102	Eif4a3	eukaryotic translation initiation factor 4A3
ENSMUSG00000032905	-2.44543	0.0929941	-0.574385	Atg12	autophagy related 12
ENSMUSG00000022304	-2.44042	0.975924	-0.387346	Dpys	dihydropyrimidinase
ENSMUSG00000028063	-2.43645	0.189211	-0.43025	Lmna	lamin A
ENSMUSG00000082460	-2.42182	0.18397	-0.433237	Gm13685	predicted gene 13685
ENSMUSG00000093656	-2.42082	0.497344	-0.0341923	Gm20628	predicted gene 20628
ENSMUSG00000037336	-2.41303	-1.03182	-0.361584	Mfsd2b	MFSD2 lysolipid transporter B, sphingolipid
ENSMUSG00000038803	-2.40921	-1.37248	1.13588	Ost4	oligosaccharyltransferase complex subunit 4 (non-catalytic)
ENSMUSG00000092746	-2.38612	0.915757	0.403652	Rn7s6	7S RNA 6
ENSMUSG00000014349	-2.38319	-2.13113	0.277138	Ube2z	ubiquitin-conjugating enzyme E2Z
ENSMUSG00000051615	-2.37834	-1.12413	-0.554619	Rap2a	RAS related protein 2a
ENSMUSG00000017376	-2.36211	2.08519	0.0410811	Nlk	nemo like kinase
ENSMUSG00000022494	-2.36197	1.38917	0.569376	Shisa9	shisa family member 9
ENSMUSG00000022912	-2.35803	0.356611	0.860281	Pros1	protein S (alpha)
ENSMUSG00000030002	-2.3525	0.708554	-0.218288	Dusp11	dual specificity phosphatase 11 (RNA/RNP complex 1-interacting)
ENSMUSG00000020611	-2.34643	-0.0576955	0.533035	Gna13	guanine nucleotide binding protein, alpha 13
ENSMUSG00000026202	-2.33932	1.09898	1.4446	Tuba4a	tubulin, alpha 4A
ENSMUSG00000058655	-2.33857	1.55835	-0.115977	Eif4b	eukaryotic translation initiation factor 4B
ENSMUSG00000027131	-2.33811	1.25231	1.3643	Emc4	ER membrane protein complex subunit 4
ENSMUSG00000001794	-2.3265	0.544755	1.28422	Capns1	calpain, small subunit 1
ENSMUSG00000092267	-2.31997	-0.975779	-0.383168	No assciated gene
ENSMUSG00000045679	-2.31127	0.335872	-0.279887	Slc66a3	solute carrier family 66 member 3
ENSMUSG00000002881	-2.31012	0.156224	1.95525	Nab1	Ngfi-A binding protein 1
ENSMUSG00000054428	-2.29927	-0.0780852	1.66308	Atpif1	ATPase inhibitory factor 1
ENSMUSG00000050592	-2.29743	0.907059	-0.659772	Fam78a	family with sequence similarity 78, member A
ENSMUSG00000068823	-2.29514	2.00312	0.546769	Csde1	cold shock domain containing E1, RNA binding
ENSMUSG00000048264	-2.29057	0.921176	-1.0258	Dip2c	disco interacting protein 2 homolog C
ENSMUSG00000073155	-2.28786	-0.468789	1.12007	Stmp1	short transmembrane mitochondrial protein 1
ENSMUSG00000016253	-2.2812	1.85906	0.0980269	Nelfcd	negative elongation factor complex member C/D, Th1l
ENSMUSG00000000861	-2.27561	-0.0614158	0.136766	Bcl11a	B cell CLL/lymphoma 11A (zinc finger protein)
ENSMUSG00000067736	-2.26632	0.800248	-0.140756	Gm10222	predicted gene 10222
ENSMUSG00000075467	-2.2647	0	-0.356142	Dnlz	DNL-type zinc finger
ENSMUSG00000081434	-2.26219	-1.34177	-0.849463	Gm14165	predicted gene 14165
ENSMUSG00000053253	-2.25277	1.16686	-0.531162	Ndfip2	Nedd4 family interacting protein 2
ENSMUSG00000063200	-2.24875	0.573184	0.683163	Nol7	nucleolar protein 7
ENSMUSG00000024853	-2.23341	0.425813	0.466854	Sf3b2	splicing factor 3b, subunit 2
ENSMUSG00000021457	-2.22906	1.14082	0.591122	Syk	spleen tyrosine kinase
ENSMUSG00000058291	-2.22739	0	-0.425973	Zfp68	zinc finger protein 68
ENSMUSG00000032966	-2.22353	1.19203	0.747455	Fkbp1a	FK506 binding protein 1a
ENSMUSG00000019920	-2.22207	1.29338	-1.45004	Lims1	LIM and senescent cell antigen-like domains 1
ENSMUSG00000027765	-2.20512	-0.921846	-0.960279	P2ry1	purinergic receptor P2Y, G-protein coupled 1
ENSMUSG00000022841	-2.19334	1.56437	0.561634	Ap2m1	adaptor-related protein complex 2, mu 1 subunit
ENSMUSG00000092702	-2.18836	0.294184	-0.14786	Gm24514	predicted gene, 24514
ENSMUSG00000029534	-2.1827	0.962123	0.0681784	St7	suppression of tumorigenicity 7
ENSMUSG00000061477	-2.17431	1.48309	-0.0375181	Rps7	ribosomal protein S7
ENSMUSG00000042323	-2.16683	-0.56527	0.07514	Pbrm1	polybromo 1
ENSMUSG00000037922	-2.16491	0.237436	-0.736656	Bank1	B cell scaffold protein with ankyrin repeats 1
ENSMUSG00000071068	-2.16344	2.50328	-0.953148	Treml2	triggering receptor expressed on myeloid cells-like 2
ENSMUSG00000024659	-2.15943	1.72016	-0.412465	Anxa1	annexin A1
ENSMUSG00000038121	-2.15671	0.284425	-1.48661	Fam210a	family with sequence similarity 210, member A
ENSMUSG00000054626	-2.15193	0	-0.0452594	Xlr	X-linked lymphocyte-regulated
ENSMUSG00000027130	-2.14598	1.47151	1.10455	Slc12a6	solute carrier family 12, member 6
ENSMUSG00000020570	-2.14096	-0.395449	-1.22029	Sypl	synaptophysin-like protein
ENSMUSG00000022314	-2.14083	1.43674	-2.21529	Rad21	RAD21 cohesin complex component
ENSMUSG00000048277	-2.13246	-0.491897	-1.97345	Syngr2	synaptogyrin 2
ENSMUSG00000056061	-2.12765	0	0	Gata5os	GATA binding protein 5, opposite strand
ENSMUSG00000032125	-2.12318	0.288391	-0.0906631	Robo4	roundabout guidance receptor 4
ENSMUSG00000029221	-2.12207	-1.54631	0.373738	Slc30a9	solute carrier family 30 (zinc transporter), member 9
ENSMUSG00000021624	-2.122	0.536138	0.478673	Cd180	CD180 antigen
ENSMUSG00000099250	-2.11923	1.46335	0.436831	No assciated gene
ENSMUSG00000057036	-2.11379	-0.898855	-1.12787	Gm7536	predicted gene 7536
ENSMUSG00000099021	-2.11139	1.46682	0.44556	No assciated gene
ENSMUSG00000027011	-2.10983	-1.87623	0.105305	Ube2e3	ubiquitin-conjugating enzyme E2E 3
ENSMUSG00000019261	-2.10568	-0.131019	0.0857762	Map1s	microtubule-associated protein 1S
ENSMUSG00000000355	-2.10507	0	-0.778479	Mcts1	malignant T cell amplified sequence 1
ENSMUSG00000030432	-2.09916	-0.433118	1.56284	Rpl28	ribosomal protein L28
ENSMUSG00000096807	-2.0903	-0.839024	1.95274	No assciated gene
ENSMUSG00000082674	-2.08759	0	-0.096557	Gm11914	predicted gene 11914
ENSMUSG00000081205	-2.08509	-1.79469	-0.33098	Gm5940	predicted gene 5940
ENSMUSG00000048076	-2.08437	0.331785	-0.99819	Arf1	ADP-ribosylation factor 1
ENSMUSG00000072829	-2.08312	-1.65749	0.123757	No assciated gene
ENSMUSG00000020717	-2.08141	1.71033	1.26556	Pecam1	platelet/endothelial cell adhesion molecule 1
ENSMUSG00000013465	-2.08104	0.708493	-0.236827	Nelfb	negative elongation factor complex member B
ENSMUSG00000040152	-2.07838	1.40288	-0.230333	Thbs1	thrombospondin 1
ENSMUSG00000000378	-2.07685	0.256755	-1.81737	Ccm2	cerebral cavernous malformation 2
ENSMUSG00000030471	-2.06657	-0.194354	0.146506	Zdhhc13	zinc finger, DHHC domain containing 13
ENSMUSG00000024286	-2.06249	1.16008	-1.66072	Ccny	cyclin Y
ENSMUSG00000030207	-2.05608	0	-1.5453	Fam234b	family with sequence similarity 234, member B
ENSMUSG00000083454	-2.05455	-0.512167	0.758342	Gm13226	predicted gene 13226
ENSMUSG00000020650	-2.05373	0	-0.0906721	Bcap29	B cell receptor associated protein 29
ENSMUSG00000030830	-2.05112	-0.730086	-0.83996	Itgal	integrin alpha L
ENSMUSG00000035885	-2.04349	-1.27314	-0.261707	Cox8a	cytochrome c oxidase subunit 8A
ENSMUSG00000000563	-2.03747	1.0007	-0.108102	Atp5pb	ATP synthase peripheral stalk-membrane subunit b
ENSMUSG00000059486	-2.0371	0.380412	-0.390696	Kbtbd2	kelch repeat and BTB (POZ) domain containing 2
ENSMUSG00000024181	-2.03648	0.147584	0.0423073	Mrpl28	mitochondrial ribosomal protein L28
ENSMUSG00000068240	-2.03389	-0.161898	0.807026	Uba52rt	ubiquitin A-52 residue ribosomal protein fusion product 1, retrotransposed
ENSMUSG00000058056	-2.03261	0.75663	1.24461	Palld	palladin, cytoskeletal associated protein
ENSMUSG00000063696	-2.02841	-1.55248	-1.12685	Gm8730	predicted pseudogene 8730
ENSMUSG00000059461	-2.02833	-0.494908	0.473399	Gm7331	predicted gene 7331
ENSMUSG00000023965	-2.02742	1.07608	1.54524	Fbxl17	F-box and leucine-rich repeat protein 17
ENSMUSG00000021377	-2.02577	-0.0027876	-0.0466306	Dek	DEK proto-oncogene (DNA binding)
ENSMUSG00000030067	-2.02124	-0.120993	-1.92813	Foxp1	forkhead box P1
ENSMUSG00000039770	-2.0212	-1.57961	-1.40626	Ypel5	yippee like 5
ENSMUSG00000091313	-2.02087	-0.261878	0.217805	Fth-ps2	ferritin heavy chain, pseudogene 2
ENSMUSG00000079215	-2.01719	-1.1551	-1.53292	Zfp664	zinc finger protein 664
ENSMUSG00000058905	-2.0129	0.233438	1.18817	Gm10051	predicted pseudogene 10051
ENSMUSG00000029563	-1.99858	0.343796	-0.194407	Foxp2	forkhead box P2
ENSMUSG00000003731	-1.98974	0.804619	-1.93007	Kpna6	karyopherin (importin) alpha 6
ENSMUSG00000029062	-1.98931	0.714978	-0.530036	Cdk11b	cyclin dependent kinase 11B
ENSMUSG00000021112	-1.9887	2.35597	-1.40342	Pals1	protein associated with LIN7 1, MAGUK family member
ENSMUSG00000003429	-1.98768	-0.527614	-0.784106	Rps11	ribosomal protein S11
ENSMUSG00000024052	-1.97373	-0.657168	0.931349	Lpin2	lipin 2
ENSMUSG00000068614	-1.97166	0.100455	1.6159	Actc1	actin, alpha, cardiac muscle 1
ENSMUSG00000052459	-1.97054	0.449041	0.771515	Atp6v1a	ATPase, H+ transporting, lysosomal V1 subunit A
ENSMUSG00000040234	-1.9692	-0.639978	1.87447	Tm7sf3	transmembrane 7 superfamily member 3
ENSMUSG00000050010	-1.96761	1.54503	-0.86226	Shisa3	shisa family member 3
ENSMUSG00000038126	-1.95733	0.819432	0.541765	Mphosph9	M-phase phosphoprotein 9
ENSMUSG00000009114	-1.95583	0	-0.895337	2610028H24Rik	RIKEN cDNA 2610028H24 gene
ENSMUSG00000081113	-1.95467	-0.465188	-1.05343	Gm7308	predicted pseudogene 7308
ENSMUSG00000031802	-1.9523	1.4248	-0.541981	Phxr4	per-hexamer repeat gene 4
ENSMUSG00000021279	-1.95114	-1.68684	-1.3836	Cdc42bpb	CDC42 binding protein kinase beta
ENSMUSG00000001435	-1.95067	-0.189185	0.423725	Col18a1	collagen, type XVIII, alpha 1
ENSMUSG00000028790	-1.94987	0.666292	1.1063	Khdrbs1	KH domain containing, RNA binding, signal transduction associated 1
ENSMUSG00000026028	-1.94471	0.631557	-0.845498	Trak2	trafficking protein, kinesin binding 2
ENSMUSG00000078684	-1.93768	0.759922	-0.113978	5830417I10Rik	RIKEN cDNA 5830417I10 gene
ENSMUSG00000079942	-1.93386	0.252121	1.12381	Rpl28-ps3	ribosomal protein L28, pseudogene 3
ENSMUSG00000025465	-1.92978	1.19169	0.812243	Echs1	enoyl Coenzyme A hydratase, short chain, 1, mitochondrial
ENSMUSG00000024308	-1.92664	0.737764	-0.126853	Tapbp	TAP binding protein
ENSMUSG00000044199	-1.92549	0.337002	-0.197931	S1pr4	sphingosine-1-phosphate receptor 4
ENSMUSG00000041112	-1.92403	1.70021	1.02884	Elmo1	engulfment and cell motility 1
ENSMUSG00000020777	-1.92356	-0.965709	-0.424891	Acox1	acyl-Coenzyme A oxidase 1, palmitoyl
ENSMUSG00000041417	-1.92177	0.327475	-0.27454	Pik3r1	phosphoinositide-3-kinase regulatory subunit 1
ENSMUSG00000026309	-1.9205	1.60927	-0.784122	Ilkap	integrin-linked kinase-associated serine/threonine phosphatase 2C
ENSMUSG00000028657	-1.91395	0.421362	0.632203	Ppt1	palmitoyl-protein thioesterase 1
ENSMUSG00000060586	-1.91014	-0.187924	-0.990233	H2-Eb1	histocompatibility 2, class II antigen E beta
ENSMUSG00000062203	-1.90829	1.14756	-0.737477	Gspt1	G1 to S phase transition 1
ENSMUSG00000021967	-1.9044	1.62888	-0.033714	Mrpl57	mitochondrial ribosomal protein L57
ENSMUSG00000024583	-1.90227	0.340117	-0.0370564	Txnl1	thioredoxin-like 1
ENSMUSG00000050299	-1.90123	-0.0827213	-0.239837	Gm9843	predicted gene 9843
ENSMUSG00000031812	-1.89518	-1.07904	0.0750045	Map1lc3b	microtubule-associated protein 1 light chain 3 beta
ENSMUSG00000074909	-1.89349	-0.194354	1.25297	Ranbp6	RAN binding protein 6
ENSMUSG00000024610	-1.8918	0.746296	0.690335	Cd74	CD74 antigen (invariant polypeptide of major histocompatibility complex, class II antigen-associated)
ENSMUSG00000041459	-1.88187	1.33442	-0.899881	Tardbp	TAR DNA binding protein
ENSMUSG00000078810	-1.8817	-1.02042	0.783207	Gp6	glycoprotein 6 (platelet)
ENSMUSG00000020483	-1.88035	-1.03612	-0.748978	Dynll2	dynein light chain LC8-type 2
ENSMUSG00000046341	-1.87865	0	-0.358528	Gm11223	predicted gene 11223
ENSMUSG00000078193	-1.87702	0.251272	-0.302381	Gm2000	predicted gene 2000
ENSMUSG00000040506	-1.87641	0	0.420053	Ambra1	autophagy/beclin 1 regulator 1
ENSMUSG00000054199	-1.87248	0.751384	-0.231034	Gon4l	gon-4-like (C.elegans)
ENSMUSG00000021518	-1.87214	-0.175099	-0.458637	Ptdss1	phosphatidylserine synthase 1
ENSMUSG00000074092	-1.86767	0.97815	0.1943	Gm6181	predicted pseudogene 6181
ENSMUSG00000032549	-1.85972	0.647447	-0.197596	Rab6b	RAB6B, member RAS oncogene family
ENSMUSG00000046364	-1.85104	-0.0436159	-0.229671	Rpl27a	ribosomal protein L27A
ENSMUSG00000020496	-1.84591	0.423378	-0.938694	Rnf187	ring finger protein 187
ENSMUSG00000078920	-1.84491	1.95354	0.889566	Ifi47	interferon gamma inducible protein 47
ENSMUSG00000062585	-1.84478	0.116001	-1.20296	Cnr2	cannabinoid receptor 2 (macrophage)
ENSMUSG00000098912	-1.83304	0.714978	-0.548388	1500004A13Rik	RIKEN cDNA 1500004A13 gene
ENSMUSG00000034994	-1.83011	-1.43408	-0.00414843	Eef2	eukaryotic translation elongation factor 2
ENSMUSG00000096942	-1.82987	-1.26586	0.835685	Rps19-ps6	ribosomal protein S19, pseudogene 6
ENSMUSG00000021054	-1.82936	0.264445	-0.237173	Sgpp1	sphingosine-1-phosphate phosphatase 1
ENSMUSG00000061390	-1.82816	-1.31827	0.334899	Uba52-ps	ubitquitin A-52 residue ribosomal protein fusion product 1, pseudogene
ENSMUSG00000000374	-1.82216	1.3615	0.310632	Trappc10	trafficking protein particle complex 10
ENSMUSG00000054412	-1.82153	0	-0.168825	Gm4793	predicted gene 4793
ENSMUSG00000038351	-1.82124	0	1.38748	Sgsm2	small G protein signaling modulator 2
ENSMUSG00000050912	-1.81579	-0.60308	0.706773	Tmem123	transmembrane protein 123
ENSMUSG00000085284	-1.81413	0.0810263	0.848835	Gm16189	predicted gene 16189
ENSMUSG00000025968	-1.81237	-0.724637	0.11768	Ndufs1	NADH:ubiquinone oxidoreductase core subunit S1
ENSMUSG00000038717	-1.81128	-0.35603	0.600801	Atp5l	ATP synthase, H+ transporting, mitochondrial F0 complex, subunit G
ENSMUSG00000026219	-1.8093	0.96095	0.0884665	Trip12	thyroid hormone receptor interactor 12
ENSMUSG00000036751	-1.80661	-0.593488	0.128423	Cox6b1	cytochrome c oxidase, subunit 6B1
ENSMUSG00000025487	-1.79852	-0.360031	0.347497	Psmd13	proteasome (prosome, macropain) 26S subunit, non-ATPase, 13
ENSMUSG00000029449	-1.79267	0.348887	-0.746263	Rhof	ras homolog family member F (in filopodia)
ENSMUSG00000050965	-1.78693	0.505848	0.198087	Prkca	protein kinase C, alpha
ENSMUSG00000040013	-1.78553	0.276184	0	Fkbp6	FK506 binding protein 6
ENSMUSG00000090625	-1.78422	-0.854296	-0.385041	Gm20721	predicted gene, 20721
ENSMUSG00000030264	-1.77702	1.05677	0.00242991	Thumpd3	THUMP domain containing 3
ENSMUSG00000019173	-1.7767	1.21025	0.555144	Rab5c	RAB5C, member RAS oncogene family
ENSMUSG00000009927	-1.77207	0.395037	-0.577294	Rps25	ribosomal protein S25
ENSMUSG00000092805	-1.76859	0.48822	-0.282249	Gm26461	predicted gene, 26461
ENSMUSG00000028530	-1.76741	-0.960793	1.36525	Jak1	Janus kinase 1
ENSMUSG00000038068	-1.76662	1.3037	1.92074	Rnf144b	ring finger protein 144B
ENSMUSG00000028544	-1.76635	0.468258	-0.331485	Slc5a9	solute carrier family 5 (sodium/glucose cotransporter), member 9
ENSMUSG00000029003	-1.76069	0.139073	-0.888471	Mad2l2	MAD2 mitotic arrest deficient-like 2
ENSMUSG00000085099	-1.75751	0.988843	-0.343704	Gm16288	predicted gene 16288
ENSMUSG00000028822	-1.75381	0.24597	1.58134	Tmem50a	transmembrane protein 50A
ENSMUSG00000050640	-1.75243	0	0.900587	Tmem150c	transmembrane protein 150C
ENSMUSG00000032503	-1.74904	-0.0855059	-1.50914	Arpp21	cyclic AMP-regulated phosphoprotein, 21
ENSMUSG00000061315	-1.74828	-0.758612	-0.462526	Naca	nascent polypeptide-associated complex alpha polypeptide
ENSMUSG00000036943	-1.74477	0.0410631	-0.8037	Rab8b	RAB8B, member RAS oncogene family
ENSMUSG00000005583	-1.74299	0.137868	0.168027	Mef2c	myocyte enhancer factor 2C
ENSMUSG00000045983	-1.74123	-0.214097	0.763395	Eif4g1	eukaryotic translation initiation factor 4, gamma 1
ENSMUSG00000037674	-1.74012	-0.409623	-0.514575	Rfx7	regulatory factor X, 7
ENSMUSG00000001155	-1.73892	0	0.74523	Ftcd	formiminotransferase cyclodeaminase
ENSMUSG00000031799	-1.73777	-0.58187	-0.102728	Tpm4	tropomyosin 4
ENSMUSG00000026103	-1.73461	0.192625	0.615915	Gls	glutaminase
ENSMUSG00000022951	-1.73098	0.401328	-1.03397	Rcan1	regulator of calcineurin 1
ENSMUSG00000028410	-1.73089	0.636719	-0.450875	Dnaja1	DnaJ heat shock protein family (Hsp40) member A1
ENSMUSG00000053080	-1.73009	0.518417	0.391596	Zfta	zinc finger translocation associated
ENSMUSG00000021051	-1.72914	1.89122	-0.281976	Ppp2r5e	protein phosphatase 2, regulatory subunit B', epsilon
ENSMUSG00000095597	-1.72513	1.61713	0.0136613	Rps7-ps3	ribosomal protein S7, pseudogene 3
ENSMUSG00000068040	-1.72258	-0.030513	0.572239	Tm9sf4	transmembrane 9 superfamily member 4
ENSMUSG00000095991	-1.72224	-1.02146	-0.630256	Gm17048	predicted gene 17048
ENSMUSG00000003573	-1.7158	-1.27742	1.12559	Homer3	homer scaffolding protein 3
ENSMUSG00000029366	-1.71578	0.800085	-0.0440786	Dck	deoxycytidine kinase
ENSMUSG00000084111	-1.7144	1.68459	-1.73662	Gm15710	predicted gene 15710
ENSMUSG00000029722	-1.71274	0.0718709	-1.31382	Agfg2	ArfGAP with FG repeats 2
ENSMUSG00000081249	-1.71156	-0.290727	0.339623	Gm11517	predicted gene 11517
ENSMUSG00000020134	-1.7103	0.570502	0.393715	Peli1	pellino 1
ENSMUSG00000038332	-1.71007	0.417692	-1.70237	Sesn1	sestrin 1
ENSMUSG00000021549	-1.70656	-1.58647	-0.0229026	Rasa1	RAS p21 protein activator 1
ENSMUSG00000027220	-1.70508	0.802806	0.452247	Syt13	synaptotagmin XIII
ENSMUSG00000020787	-1.70508	-0.111452	-0.674176	P2rx1	purinergic receptor P2X, ligand-gated ion channel, 1
ENSMUSG00000087235	-1.70155	-0.549496	-0.152844	Gm4750	predicted gene 4750
ENSMUSG00000084830	-1.69954	-0.118351	0.236774	Gm14539	predicted gene 14539
ENSMUSG00000070733	-1.6994	-0.0649277	-0.368499	Fryl	FRY like transcription coactivator
ENSMUSG00000071644	-1.69814	-0.822541	-1.36708	Eef1g	eukaryotic translation elongation factor 1 gamma
ENSMUSG00000082120	-1.69778	-0.0128726	-0.378249	Gm15720	predicted gene 15720
ENSMUSG00000020108	-1.69508	1.58841	-0.287546	Ddit4	DNA-damage-inducible transcript 4
ENSMUSG00000059689	-1.69488	0.141522	-0.49682	Zfp637	zinc finger protein 637
ENSMUSG00000048000	-1.69251	1.13105	-0.299189	Gigyf2	GRB10 interacting GYF protein 2
ENSMUSG00000031245	-1.68608	-0.194354	-0.24997	Hmgn5	high-mobility group nucleosome binding domain 5
ENSMUSG00000029165	-1.68433	-1.22321	1.13555	Agbl5	ATP/GTP binding protein-like 5
ENSMUSG00000038056	-1.6841	0.650228	0.244055	Kmt2c	lysine (K)-specific methyltransferase 2C
ENSMUSG00000076432	-1.68328	-1.02639	-1.25589	Ywhaq	tyrosine 3-monooxygenase/tryptophan 5-monooxygenase activation protein theta
ENSMUSG00000026832	-1.6814	0.262108	-1.49128	Cytip	cytohesin 1 interacting protein
ENSMUSG00000090119	-1.67587	0	-0.196373	Gm8185	predicted gene 8185
ENSMUSG00000079635	-1.67557	0	0.0594275	Rhox4c	reproductive homeobox 4C
ENSMUSG00000014243	-1.67344	0.175729	-0.0906631	Zswim7	zinc finger SWIM-type containing 7
ENSMUSG00000025484	-1.67344	1.86463	1.1121	Bet1l	Bet1 golgi vesicular membrane trafficking protein like
ENSMUSG00000070003	-1.67292	0.500061	0.372801	Ssbp4	single stranded DNA binding protein 4
ENSMUSG00000080775	-1.6717	0.131136	1.2516	Gm6368	predicted gene 6368
ENSMUSG00000021474	-1.67136	-1.29107	-0.217629	Sfxn1	sideroflexin 1
ENSMUSG00000053560	-1.66865	0.472981	-0.645842	Ier2	immediate early response 2
ENSMUSG00000019864	-1.66586	-0.695573	-0.36615	Rtn4ip1	reticulon 4 interacting protein 1
ENSMUSG00000096006	-1.66529	0.323745	-0.208451	Gm21596	predicted gene, 21596
ENSMUSG00000030779	-1.66351	0.975963	-0.198301	Rbbp6	retinoblastoma binding protein 6, ubiquitin ligase
ENSMUSG00000045193	-1.6634	-1.3461	0.320458	Cirbp	cold inducible RNA binding protein
ENSMUSG00000020089	-1.66116	0.364899	-0.196373	Ppa1	pyrophosphatase (inorganic) 1
ENSMUSG00000036180	-1.65944	1.27745	0.576375	Gatad2a	GATA zinc finger domain containing 2A
ENSMUSG00000082691	-1.6522	-1.23789	0.253728	Dynlt1-ps1	dynein light chain Tctex-type 1, pseuodogene 1
ENSMUSG00000086259	-1.6498	0	0.74438	Tmem150cos	transmembrane protein 150C, opposite strand
ENSMUSG00000027523	-1.64405	-0.8573	-0.386809	Gnas	GNAS (guanine nucleotide binding protein, alpha stimulating) complex locus
ENSMUSG00000062896	-1.64095	1.74446	-0.666474	Rpl31-ps11	ribosomal protein L31, pseudogene 11
ENSMUSG00000019984	-1.64084	-1.39373	-1.16448	Med23	mediator complex subunit 23
ENSMUSG00000031634	-1.64065	0.260451	-0.240085	Ufsp2	UFM1-specific peptidase 2
ENSMUSG00000026275	-1.63949	-0.206333	-0.764131	Ppp1r7	protein phosphatase 1, regulatory subunit 7
ENSMUSG00000057130	-1.63586	-0.301148	0.139198	Txnl4a	thioredoxin-like 4A
ENSMUSG00000032387	-1.63584	-0.1045	0.550982	Rbpms2	RNA binding protein with multiple splicing 2
ENSMUSG00000024073	-1.63345	0.627245	-0.546572	Birc6	baculoviral IAP repeat-containing 6
ENSMUSG00000081455	-1.62841	0.588654	-0.558853	Hmgb1-ps3	high mobility group box 1, pseudogene 3
ENSMUSG00000051504	-1.6268	0	0.136521	Siglech	sialic acid binding Ig-like lectin H
ENSMUSG00000090399	-1.62419	-0.455298	-0.283789	No assciated gene
ENSMUSG00000020689	-1.62397	0.541996	1.56398	Itgb3	integrin beta 3
ENSMUSG00000042042	-1.62022	-0.00136408	0.262977	Csgalnact2	chondroitin sulfate N-acetylgalactosaminyltransferase 2
ENSMUSG00000027602	-1.61646	-0.169038	0.487081	Map1lc3a	microtubule-associated protein 1 light chain 3 alpha
ENSMUSG00000006920	-1.61476	-1.32716	1.01183	Ezh1	enhancer of zeste 1 polycomb repressive complex 2 subunit
ENSMUSG00000019179	-1.61171	1.59331	-0.467993	Mdh2	malate dehydrogenase 2, NAD (mitochondrial)
ENSMUSG00000027164	-1.60747	-0.0035198	1.15033	Traf6	TNF receptor-associated factor 6
ENSMUSG00000066324	-1.60423	1.834	-1.38033	Bpnt2	3'(2'), 5'-bisphosphate nucleotidase 2
ENSMUSG00000044156	-1.60413	1.4422	-0.382483	Hepacam2	HEPACAM family member 2
ENSMUSG00000024507	-1.59637	0.208519	-1.11029	Hsd17b4	hydroxysteroid (17-beta) dehydrogenase 4
ENSMUSG00000000420	-1.59227	0.914576	1.32057	Galnt1	polypeptide N-acetylgalactosaminyltransferase 1
ENSMUSG00000033088	-1.58613	-0.11644	-0.925593	Triobp	TRIO and F-actin binding protein
ENSMUSG00000000740	-1.5842	1.76262	-1.63586	Rpl13	ribosomal protein L13
ENSMUSG00000085415	-1.57909	0.519142	-0.906119	Selenok-ps1	selenoprotein K, pseudogene 1
ENSMUSG00000021149	-1.57722	-0.585512	-0.468489	Gtpbp4	GTP binding protein 4
ENSMUSG00000022105	-1.57448	0.00581157	-0.464642	Rb1	RB transcriptional corepressor 1
ENSMUSG00000064179	-1.5652	-0.268066	0.200983	Tnnt1	troponin T1, skeletal, slow
ENSMUSG00000027663	-1.56469	1.38489	0.401907	Zmat3	zinc finger matrin type 3
ENSMUSG00000093577	-1.56276	-1.05527	1.2487	Gm20632	predicted gene 20632
ENSMUSG00000069310	-1.56043	1.07877	0.516505	H3c3	H3 clustered histone 3
ENSMUSG00000033712	-1.55966	-0.324191	-0.193765	Ccar2	cell cycle activator and apoptosis regulator 2
ENSMUSG00000028607	-1.5588	0.628323	-0.96495	Cpt2	carnitine palmitoyltransferase 2
ENSMUSG00000075705	-1.55778	-1.12043	-0.176905	Msrb1	methionine sulfoxide reductase B1
ENSMUSG00000026447	-1.55728	0.615428	1.36198	Pik3c2b	phosphatidylinositol-4-phosphate 3-kinase catalytic subunit type 2 beta
ENSMUSG00000034449	-1.55674	0.171263	-0.693693	Dhrs11	dehydrogenase/reductase (SDR family) member 11
ENSMUSG00000087260	-1.55636	0.173692	0.628916	Lamtor5	late endosomal/lysosomal adaptor, MAPK and MTOR activator 5
ENSMUSG00000028020	-1.5531	0	-0.0846438	Glrb	glycine receptor, beta subunit
ENSMUSG00000002068	-1.55298	0.0810263	-0.952332	Ccne1	cyclin E1
ENSMUSG00000031154	-1.55145	0.325089	0.255103	Otud5	OTU domain containing 5
ENSMUSG00000094248	-1.55084	0.51404	-0.17446	H2ac23	H2A clustered histone 23
ENSMUSG00000023050	-1.54929	0.542008	-1.43668	Map3k12	mitogen-activated protein kinase kinase kinase 12
ENSMUSG00000007987	-1.54795	0	0.529894	Ift22	intraflagellar transport 22
ENSMUSG00000030704	-1.54607	-0.115281	-0.0780666	Rab6a	RAB6A, member RAS oncogene family
ENSMUSG00000083380	-1.54493	0	-0.24997	Ndufb4c	NADH:ubiquinone oxidoreductase subunit B4C
ENSMUSG00000028249	-1.54109	-0.0952198	0.359595	Sdcbp	syndecan binding protein
ENSMUSG00000081272	-1.54093	1.41019	1.22459	Ap2m1-ps	adaptor-related protein complex 2, mu 1 subunit, pseudogene
ENSMUSG00000037824	-1.53866	0.257602	0.0505261	Tspan14	tetraspanin 14
ENSMUSG00000022323	-1.53738	-1.31108	1.04413	Rida	reactive intermediate imine deaminase A homolog
ENSMUSG00000020514	-1.527	0.0571364	0.0297984	Mrpl22	mitochondrial ribosomal protein L22
ENSMUSG00000022677	-1.5266	-1.4905	-0.256377	Cep20	centrosomal protein 20
ENSMUSG00000031072	-1.52288	0.264445	-0.669994	LTO1	ABCE maturation factor
ENSMUSG00000081677	-1.52284	0	0	Mdk-ps1	midkine pseudogene 1
ENSMUSG00000019088	-1.52111	-0.741223	-1.28914	Dnase1l1	deoxyribonuclease 1-like 1
ENSMUSG00000062742	-1.51883	-0.789778	-0.208674	Gm5239	predicted pseudogene 5239
ENSMUSG00000030220	-1.51157	1.02233	0.435509	Arhgdib	Rho, GDP dissociation inhibitor (GDI) beta
ENSMUSG00000033075	-1.50559	-0.326752	-0.890309	Senp1	SUMO1/sentrin specific peptidase 1
ENSMUSG00000031930	-1.50419	1.72001	0.290162	Wwp2	WW domain containing E3 ubiquitin protein ligase 2
ENSMUSG00000085936	-1.50275	0	0.0760098	2610307P16Rik	RIKEN cDNA 2610307P16 gene
ENSMUSG00000023272	-1.50031	-0.709302	-0.0186451	Creld2	cysteine-rich with EGF-like domains 2
ENSMUSG00000027694	-1.49783	0.295321	0.256949	Gm8325	predicted pseudogene 8325
ENSMUSG00000062727	-1.49585	-0.782892	0.372316	H2bc12	H2B clustered histone 12
ENSMUSG00000030844	-1.494	0.369816	1.00177	Rgs10	regulator of G-protein signalling 10
ENSMUSG00000080006	-1.48776	-0.282925	-0.468234	Rps19-ps7	ribosomal protein S19, pseudogene 7
ENSMUSG00000002107	-1.48682	0.00931855	0.520834	Celf2	CUGBP, Elav-like family member 2
ENSMUSG00000025359	-1.4783	0	0.55252	Pmel	premelanosome protein
ENSMUSG00000084221	-1.47668	0.470414	-0.468244	Hmgb1-ps4	high mobility group box 1, pseudogene 4
ENSMUSG00000033790	-1.47609	0.264445	-1.37725	Tubgcp5	tubulin, gamma complex associated protein 5
ENSMUSG00000037905	-1.47444	0.417446	0.769003	Bri3bp	Bri3 binding protein
ENSMUSG00000021840	-1.47282	0	-0.632739	Mapk1ip1l	mitogen-activated protein kinase 1 interacting protein 1-like
ENSMUSG00000067288	-1.46939	1.51798	1.41071	Rps28	ribosomal protein S28
ENSMUSG00000098041	-1.46858	0.367272	-0.096557	Gm26981	predicted gene, 26981
ENSMUSG00000064138	-1.46654	0.0430172	-0.697253	Fam172a	family with sequence similarity 172, member A
ENSMUSG00000018909	-1.46619	1.3567	-0.6652	Arrb1	arrestin, beta 1
ENSMUSG00000062997	-1.46494	0.486248	0.429791	Rpl35	ribosomal protein L35
ENSMUSG00000079630	-1.46441	0	-0.768306	Rhox4f	reproductive homeobox 4F
ENSMUSG00000026930	-1.46034	0	0.260682	Gpsm1	G-protein signalling modulator 1 (AGS3-like, C. elegans)
ENSMUSG00000083396	-1.46032	1.56814	0.144425	Gm15542	predicted gene 15542
ENSMUSG00000064343	-1.459	-1.15317	-0.109265	mt-Tq	mitochondrially encoded tRNA glutamine
ENSMUSG00000018363	-1.45856	-1.06425	0.0144253	Smurf2	SMAD specific E3 ubiquitin protein ligase 2
ENSMUSG00000006435	-1.4551	0	-0.820081	Neurl1a	neuralized E3 ubiquitin protein ligase 1A
ENSMUSG00000034723	-1.45462	1.29676	-1.28254	Tmx4	thioredoxin-related transmembrane protein 4
ENSMUSG00000035295	-1.45121	1.24313	0.548434	Wdr38	WD repeat domain 38
ENSMUSG00000079709	-1.44815	0.849279	0.372285	No assciated gene
ENSMUSG00000039294	-1.44619	-0.43515	0.826099	Cybc1	cytochrome b 245 chaperone 1
ENSMUSG00000025040	-1.43711	1.7099	1.02253	Fundc1	FUN14 domain containing 1
ENSMUSG00000091421	-1.43507	0.704354	-0.87555	Gm4202	predicted gene 4202
ENSMUSG00000030315	-1.43507	1.03192	0.872334	Vgll4	vestigial like family member 4
ENSMUSG00000032666	-1.43316	1.44312	-1.04616	1700025G04Rik	RIKEN cDNA 1700025G04 gene
ENSMUSG00000020732	-1.43224	0.100203	1.10766	Rab37	RAB37, member RAS oncogene family
ENSMUSG00000084878	-1.43209	0.175729	-0.169975	Lrrc8dos	leucine rich repeat containing 8D, opposite strand
ENSMUSG00000083505	-1.43143	1.17127	-1.30623	Gm7541	predicted gene 7541
ENSMUSG00000028692	-1.43014	0.609432	-1.06894	Akr1a1	aldo-keto reductase family 1, member A1 (aldehyde reductase)
ENSMUSG00000031444	-1.42807	-1.14181	1.30939	F10	coagulation factor X
ENSMUSG00000094777	-1.4254	0.402439	-0.225023	H2ac24	H2A clustered histone 24
ENSMUSG00000006304	-1.42207	1.29856	1.52336	Arpc2	actin related protein 2/3 complex, subunit 2
ENSMUSG00000022994	-1.42179	-0.287191	0.565918	Adcy6	adenylate cyclase 6
ENSMUSG00000022858	-1.41701	1.55505	-0.012679	Tra2b	transformer 2 beta
ENSMUSG00000006941	-1.414	-0.238415	-1.39218	Eif1b	eukaryotic translation initiation factor 1B
ENSMUSG00000060419	-1.41395	1.3865	-0.355686	Rps16-ps2	ribosomal protein S16, pseudogene 2
ENSMUSG00000014592	-1.41185	-0.366349	1.34171	Camta1	calmodulin binding transcription activator 1
ENSMUSG00000023092	-1.40682	-0.232693	-0.144286	Fhl1	four and a half LIM domains 1
ENSMUSG00000037692	-1.40659	0	0.0439705	Ahdc1	AT hook, DNA binding motif, containing 1
ENSMUSG00000028832	-1.40659	0	-0.251635	Stmn1	stathmin 1
ENSMUSG00000044617	-1.40659	0.264445	0.373561	Zbtb39	zinc finger and BTB domain containing 39
ENSMUSG00000079639	-1.39563	0	-0.231384	Rhox4a	reproductive homeobox 4A
ENSMUSG00000029148	-1.393	0.0810263	-0.438562	Nrbp1	nuclear receptor binding protein 1
ENSMUSG00000036572	-1.39125	0	0.0477151	Upf3b	UPF3 regulator of nonsense transcripts homolog B (yeast)
ENSMUSG00000059409	-1.39077	-0.220793	0.5064	Ppp2r5d	protein phosphatase 2, regulatory subunit B', delta
ENSMUSG00000003810	-1.39015	-0.745282	0.4875	Mast2	microtubule associated serine/threonine kinase 2
ENSMUSG00000021771	-1.38649	-0.113751	0.995961	Vdac2	voltage-dependent anion channel 2
ENSMUSG00000038274	-1.38613	-0.253175	-0.463865	Fau	Finkel-Biskis-Reilly murine sarcoma virus (FBR-MuSV) ubiquitously expressed (fox derived)
ENSMUSG00000018800	-1.38486	0.321314	-0.245772	Abca5	ATP-binding cassette, sub-family A (ABC1), member 5
ENSMUSG00000004071	-1.38485	0.255825	0.423434	Cdip1	cell death inducing Trp53 target 1
ENSMUSG00000025410	-1.38276	0	0.75128	Dctn2	dynactin 2
ENSMUSG00000039001	-1.38271	0.760806	-1.31237	Rps21	ribosomal protein S21
ENSMUSG00000026134	-1.38036	0.358843	-0.0221792	Prim2	DNA primase, p58 subunit
ENSMUSG00000031913	-1.38036	0.919075	0.502755	Vps4a	vacuolar protein sorting 4A
ENSMUSG00000008226	-1.37578	-0.107157	-0.0677683	Scrn3	secernin 3
ENSMUSG00000028464	-1.37471	0.513737	1.13543	Tpm2	tropomyosin 2, beta
ENSMUSG00000051839	-1.37352	0.127842	0.987445	Gypa	glycophorin A
ENSMUSG00000026737	-1.3732	0.635121	0.187134	Pip4k2a	phosphatidylinositol-5-phosphate 4-kinase, type II, alpha
ENSMUSG00000043372	-1.3714	1.44068	-0.197523	Hexim2	hexamethylene bis-acetamide inducible 2
ENSMUSG00000006818	-1.36741	0.800613	-1.05444	Sod2	superoxide dismutase 2, mitochondrial
ENSMUSG00000022500	-1.36656	-0.958278	0.546606	Litaf	LPS-induced TN factor
ENSMUSG00000021548	-1.36575	-1.22713	1.08013	Ccnh	cyclin H
ENSMUSG00000025510	-1.36515	0.0561042	-0.109157	Cd151	CD151 antigen
ENSMUSG00000091460	-1.36473	0.953796	0.957361	Gm7808	predicted pseudogene 7808
ENSMUSG00000035722	-1.36057	0.113466	-1.02903	Abca7	ATP-binding cassette, sub-family A (ABC1), member 7
ENSMUSG00000037296	-1.35866	-0.916818	-0.599847	Lsm1	LSM1 homolog, mRNA degradation associated
ENSMUSG00000021427	-1.35745	-1.10923	-0.447225	Ssr1	signal sequence receptor, alpha
ENSMUSG00000038253	-1.35442	0	0.217931	Hoxa5	homeobox A5
ENSMUSG00000096795	-1.35442	0	1.47938	Zfp433	zinc finger protein 433
ENSMUSG00000080772	-1.35188	0.686284	-0.262176	Gm12543	predicted gene 12543
ENSMUSG00000002768	-1.3503	-0.220793	0.418278	Mea1	male enhanced antigen 1
ENSMUSG00000018189	-1.35026	0	1.148	Uchl5	ubiquitin carboxyl-terminal esterase L5
ENSMUSG00000040652	-1.34208	0.874927	0.379138	Oaz2	ornithine decarboxylase antizyme 2
ENSMUSG00000092281	-1.34165	-0.162335	-0.296441	Hmgb1-ps7	high-mobility group high mobility group box 1, pseudogene 7
ENSMUSG00000043183	-1.34124	-1.09644	-0.645487	Simc1	SUMO-interacting motifs containing 1
ENSMUSG00000021916	-1.33861	0.271966	0.218941	Glt8d1	glycosyltransferase 8 domain containing 1
ENSMUSG00000055531	-1.33631	0.885077	0.0632498	Cpsf6	cleavage and polyadenylation specific factor 6
ENSMUSG00000018585	-1.33223	0.0336042	0.74437	Atox1	antioxidant 1 copper chaperone
ENSMUSG00000025357	-1.32985	-0.667238	-0.410037	Dgka	diacylglycerol kinase, alpha
ENSMUSG00000018999	-1.32814	0	1.42767	Slc35b4	solute carrier family 35, member B4
ENSMUSG00000020111	-1.32359	0.739867	0.136377	Micu1	mitochondrial calcium uptake 1
ENSMUSG00000094258	-1.32351	0	-0.0798673	Gm8159	predicted gene 8159
ENSMUSG00000034209	-1.32274	1.09404	-0.229853	Rasl10a	RAS-like, family 10, member A
ENSMUSG00000095797	-1.32064	0.0810263	-1.29183	Gm8246	predicted gene 8246
ENSMUSG00000013663	-1.3205	-0.0269561	-0.131361	Pten	phosphatase and tensin homolog
ENSMUSG00000094446	-1.32033	0.189816	0.408555	Gm6344	predicted gene 6344
ENSMUSG00000026502	-1.3171	1.04545	1.23898	Desi2	desumoylating isopeptidase 2
ENSMUSG00000089989	-1.3171	0.171095	-0.123638	Gm45713	predicted gene 45713
ENSMUSG00000021288	-1.31617	1.29788	-0.239331	Klc1	kinesin light chain 1
ENSMUSG00000075415	-1.31239	1.3167	1.1442	Fnbp1	formin binding protein 1
ENSMUSG00000093553	-1.3123	-1.16393	1.2629	Gm20633	predicted gene 20633
ENSMUSG00000045128	-1.31222	1.05529	1.21432	Rpl18a	ribosomal protein L18A
ENSMUSG00000094578	-1.31171	0	-1.40484	Gm3187	predicted gene 3187
ENSMUSG00000038115	-1.3104	0.752022	0.38499	Ano2	anoctamin 2
ENSMUSG00000028979	-1.30584	-0.715055	0.565733	Masp2	mannan-binding lectin serine peptidase 2
ENSMUSG00000079435	-1.3044	1.55618	-0.689951	Rpl36a	ribosomal protein L36A
ENSMUSG00000031972	-1.30438	0.100455	1.11111	Acta1	actin alpha 1, skeletal muscle
ENSMUSG00000059291	-1.3021	0.401328	-0.936034	Rpl11	ribosomal protein L11
ENSMUSG00000030956	-1.30132	-0.761915	-0.217521	Fam53b	family with sequence similarity 53, member B
ENSMUSG00000020738	-1.29986	0.90895	-1.25344	Sumo2	small ubiquitin-like modifier 2
ENSMUSG00000066551	-1.29787	-0.136066	-0.939505	Hmgb1	high mobility group box 1
ENSMUSG00000041629	-1.29698	1.51928	-0.997822	Fam104a	family with sequence similarity 104, member A
ENSMUSG00000093056	-1.29591	-0.194354	-0.160745	Gm24812	predicted gene, 24812
ENSMUSG00000039545	-1.29572	0.175729	-0.24714	Flicr	Foxp3 regulating long intergenic noncoding RNA
ENSMUSG00000024182	-1.29069	0	-0.761127	Axin1	axin 1
ENSMUSG00000033938	-1.29069	0.367148	0.257603	Ndufb7	NADH:ubiquinone oxidoreductase subunit B7
ENSMUSG00000066979	-1.29011	1.31359	-1.32813	Bub3	BUB3 mitotic checkpoint protein
ENSMUSG00000037355	-1.28989	0.0313531	-0.58179	Uvssa	UV stimulated scaffold protein A
ENSMUSG00000069301	-1.28936	-0.339047	0.632832	H2ac11	H2A clustered histone 11
ENSMUSG00000053977	-1.28931	1.62537	1.10309	Cd8a	CD8 antigen, alpha chain
ENSMUSG00000068391	-1.28891	1.00854	0.135137	Chrac1	chromatin accessibility complex 1
ENSMUSG00000008892	-1.2882	-0.0944425	1.34762	Vdac3	voltage-dependent anion channel 3
ENSMUSG00000025857	-1.28751	0	0.795388	Dnaaf5	dynein, axonemal assembly factor 5
ENSMUSG00000003308	-1.28605	0.596507	-0.600895	Keap1	kelch-like ECH-associated protein 1
ENSMUSG00000092624	-1.28377	0	-0.315627	Gm3654	predicted gene 3654
ENSMUSG00000023025	-1.27474	1.22448	0.547389	Larp4	La ribonucleoprotein 4
ENSMUSG00000081051	-1.27438	0.533547	0.679541	Gm15427	predicted pseudogene 15427
ENSMUSG00000056608	-1.27119	0.321751	-0.100571	Chd9	chromodomain helicase DNA binding protein 9
ENSMUSG00000057236	-1.26709	0.542568	-0.132037	Rbbp4	retinoblastoma binding protein 4, chromatin remodeling factor
ENSMUSG00000022749	-1.26383	-0.149875	-0.552093	Tbc1d23	TBC1 domain family, member 23
ENSMUSG00000009090	-1.26243	0.875353	1.33177	Ap1b1	adaptor protein complex AP-1, beta 1 subunit
ENSMUSG00000087107	-1.25835	0.44767	0.186306	AI662270	expressed sequence AI662270
ENSMUSG00000047446	-1.25456	-0.38871	0.340919	Arl4a	ADP-ribosylation factor-like 4A
ENSMUSG00000097056	-1.25274	0.449944	1.33032	No assciated gene
ENSMUSG00000025871	-1.25204	-0.681631	-1.04635	4833439L19Rik	RIKEN cDNA 4833439L19 gene
ENSMUSG00000060393	-1.25112	-0.309439	-0.821379	No assciated gene
ENSMUSG00000006127	-1.24876	0.668601	0.721257	Inpp5k	inositol polyphosphate 5-phosphatase K
ENSMUSG00000095908	-1.24505	-0.573115	-0.66161	No assciated gene
ENSMUSG00000030144	-1.24201	1.32566	1.33299	Clec4d	C-type lectin domain family 4, member d
ENSMUSG00000015697	-1.24153	0.965004	0.00927167	Setdb1	SET domain, bifurcated 1
ENSMUSG00000001847	-1.24131	-0.220285	-0.0213977	Rac1	Rac family small GTPase 1
ENSMUSG00000072946	-1.2406	0.534256	-0.342797	Ptgr2	prostaglandin reductase 2
ENSMUSG00000064365	-1.24011	0.303014	-0.69557	mt-Ts2	mitochondrially encoded tRNA serine 2
ENSMUSG00000084756	-1.23957	0.0810263	0	Gm13881	predicted gene 13881
ENSMUSG00000031494	-1.23927	0.0810263	-0.164098	Cd209a	CD209a antigen
ENSMUSG00000029066	-1.23607	-0.25114	0.539454	Mrpl20	mitochondrial ribosomal protein L20
ENSMUSG00000050304	-1.23607	0	-0.143754	Slc25a2	solute carrier family 25 (mitochondrial carrier, ornithine transporter) member 2
ENSMUSG00000084104	-1.2352	1.09023	0.338324	Gm13578	predicted gene 13578
ENSMUSG00000042772	-1.23211	0.610052	0.0109947	Smg7	SMG7 nonsense mediated mRNA decay factor
ENSMUSG00000065947	-1.22999	0.670411	-0.108497	mt-Nd4l	mitochondrially encoded NADH dehydrogenase 4L
ENSMUSG00000063446	-1.22817	0	1.13918	Plppr1	phospholipid phosphatase related 1
ENSMUSG00000021242	-1.22796	-0.669698	0.821319	Npc2	NPC intracellular cholesterol transporter 2
ENSMUSG00000032175	-1.22589	0.230014	-0.231001	Tyk2	tyrosine kinase 2
ENSMUSG00000052273	-1.22248	0	0.439947	Dnah3	dynein, axonemal, heavy chain 3
ENSMUSG00000026260	-1.22224	0.256755	-0.403789	Ndufa10	NADH:ubiquinone oxidoreductase subunit A10
ENSMUSG00000040822	-1.22004	0.437379	-0.904635	1700123O20Rik	RIKEN cDNA 1700123O20 gene
ENSMUSG00000032561	-1.21514	-0.357253	-0.903977	Acp3	acid phosphatase 3
ENSMUSG00000021832	-1.21348	0.365452	-0.808948	Psmc6	proteasome (prosome, macropain) 26S subunit, ATPase, 6
ENSMUSG00000038965	-1.21239	1.28025	0.659487	Ube2l3	ubiquitin-conjugating enzyme E2L 3
ENSMUSG00000009741	-1.21039	-0.414528	-0.583292	Ubp1	upstream binding protein 1
ENSMUSG00000004044	-1.20984	1.11911	-0.253336	Cavin1	caveolae associated 1
ENSMUSG00000032724	-1.20878	0	-0.142081	Abtb2	ankyrin repeat and BTB (POZ) domain containing 2
ENSMUSG00000083089	-1.20878	0	-0.0661391	Gm4760	predicted gene 4760
ENSMUSG00000034522	-1.20878	0	0.0392059	Zfp395	zinc finger protein 395
ENSMUSG00000020346	-1.20865	0.677414	0.929723	Mgat1	mannoside acetylglucosaminyltransferase 1
ENSMUSG00000022791	-1.20673	-0.56048	0.709855	Tnk2	tyrosine kinase, non-receptor, 2
ENSMUSG00000072576	-1.19868	-0.371374	0.774338	Gm16020	predicted gene 16020
ENSMUSG00000068205	-1.19014	-0.956528	0.0401031	Macrod2	mono-ADP ribosylhydrolase 2
ENSMUSG00000067367	-1.18965	0	0.272937	Lyar	Ly1 antibody reactive clone
ENSMUSG00000031604	-1.18947	0.225625	-0.125318	Msmo1	methylsterol monoxygenase 1
ENSMUSG00000000325	-1.18836	-0.126492	0.00215059	No assciated gene
ENSMUSG00000025019	-1.1857	0	-0.157448	Lcor	ligand dependent nuclear receptor corepressor
ENSMUSG00000078034	-1.1857	0	-0.153413	No assciated gene
ENSMUSG00000082926	-1.18534	0.150687	-0.433089	Gm8172	predicted pseudogene 8172
ENSMUSG00000043909	-1.18508	0.409361	1.15458	Trp53bp1	transformation related protein 53 binding protein 1
ENSMUSG00000022433	-1.17871	0.698028	-0.930151	Csnk1e	casein kinase 1, epsilon
ENSMUSG00000081673	-1.1733	-0.113327	1.23399	Gm14794	predicted gene 14794
ENSMUSG00000059552	-1.1733	0	0	Trp53	transformation related protein 53
ENSMUSG00000022426	-1.17123	-0.273594	-0.216218	Josd1	Josephin domain containing 1
ENSMUSG00000021676	-1.17032	0.448415	1.07724	Iqgap2	IQ motif containing GTPase activating protein 2
ENSMUSG00000033237	-1.16866	-1.06326	0.361424	Arid2	AT rich interactive domain 2 (ARID, RFX-like)
ENSMUSG00000099104	-1.16703	-0.716412	0.0891324	Gm17087	predicted gene 17087
ENSMUSG00000030672	-1.16652	0.321314	-0.0704918	Mylpf	myosin light chain, phosphorylatable, fast skeletal muscle
ENSMUSG00000060128	-1.16565	0.273713	-0.206649	Gm2710	predicted gene 2710
ENSMUSG00000029005	-1.16427	0	-0.582985	Draxin	dorsal inhibitory axon guidance protein
ENSMUSG00000012640	-1.16389	1.27632	0.242942	Zfp715	zinc finger protein 715
ENSMUSG00000020629	-1.16336	0.0810263	0.189167	Adi1	acireductone dioxygenase 1
ENSMUSG00000030246	-1.16181	0.175729	-0.158043	Ldhb	lactate dehydrogenase B
ENSMUSG00000033306	-1.16115	0.813612	-0.511012	Lpp	LIM domain containing preferred translocation partner in lipoma
ENSMUSG00000041220	-1.16002	0.407768	0.675689	Elovl6	ELOVL family member 6, elongation of long chain fatty acids (yeast)
ENSMUSG00000036402	-1.15831	0.107786	-0.61017	Gng12	guanine nucleotide binding protein (G protein), gamma 12
ENSMUSG00000089824	-1.15496	-0.317814	0.883794	Rbm12	RNA binding motif protein 12
ENSMUSG00000079628	-1.15064	0	-0.741952	Rhox4g	reproductive homeobox 4G
ENSMUSG00000012126	-1.14944	1.01873	0.0400707	Ubxn11	UBX domain protein 11
ENSMUSG00000087040	-1.14519	-0.317814	-0.964061	Gm14033	predicted gene 14033
ENSMUSG00000035248	-1.14244	1.08196	-0.102514	Tut7	terminal uridylyl transferase 7
ENSMUSG00000035674	-1.14227	0	0.355442	Ndufa3	NADH:ubiquinone oxidoreductase subunit A3
ENSMUSG00000007476	-1.14045	0.908496	-0.63236	Lrrc8a	leucine rich repeat containing 8A VRAC subunit A
ENSMUSG00000047714	-1.13556	-0.768831	0.240994	Ppp1r2	protein phosphatase 1, regulatory inhibitor subunit 2
ENSMUSG00000097664	-1.13458	0	-0.105474	No assciated gene
ENSMUSG00000083953	-1.1343	0	-0.0906631	Gm14049	predicted gene 14049
ENSMUSG00000063358	-1.13323	0.976162	-0.836325	Mapk1	mitogen-activated protein kinase 1
ENSMUSG00000018750	-1.13308	-0.023257	-0.814628	Zbtb4	zinc finger and BTB domain containing 4
ENSMUSG00000071528	-1.13072	-0.178919	0.262046	Atp5md	ATP synthase membrane subunit DAPIT
ENSMUSG00000086013	-1.12981	0.475434	-0.605465	Gm15706	predicted gene 15706
ENSMUSG00000020074	-1.12935	0.98067	0.887935	Ccar1	cell division cycle and apoptosis regulator 1
ENSMUSG00000041084	-1.12926	-0.187079	-0.903428	Ostc	oligosaccharyltransferase complex subunit (non-catalytic)
ENSMUSG00000050128	-1.12643	0	0	Or5m10	olfactory receptor family 5 subfamily M member 10
ENSMUSG00000062458	-1.12212	1.19727	-0.605128	Gm8623	predicted gene 8623
ENSMUSG00000028948	-1.12198	0	1.0911	Nol9	nucleolar protein 9
ENSMUSG00000039307	-1.12027	-0.0954673	0.606397	Hexdc	hexosaminidase (glycosyl hydrolase family 20, catalytic domain) containing
ENSMUSG00000026878	-1.12002	0.572536	-0.727811	Rab14	RAB14, member RAS oncogene family
ENSMUSG00000037679	-1.11792	0.168267	0.487185	Inf2	inverted formin, FH2 and WH2 domain containing
ENSMUSG00000029344	-1.11771	0.886778	0.11881	Tpst2	protein-tyrosine sulfotransferase 2
ENSMUSG00000005667	-1.11753	-0.85058	-0.908952	Mthfd2	methylenetetrahydrofolate dehydrogenase (NAD+ dependent), methenyltetrahydrofolate cyclohydrolase
ENSMUSG00000027589	-1.114	0.470855	0.377983	Pcmtd2	protein-L-isoaspartate (D-aspartate) O-methyltransferase domain containing 2
ENSMUSG00000037242	-1.11154	0.490408	-0.804104	Clic4	chloride intracellular channel 4 (mitochondrial)
ENSMUSG00000020925	-1.10895	-0.503228	0.108785	Ccdc43	coiled-coil domain containing 43
ENSMUSG00000037376	-1.10895	0	0.534857	Trmt6	tRNA methyltransferase 6
ENSMUSG00000036552	-1.10543	0.821349	-0.274514	Ermard	ER membrane associated RNA degradation
ENSMUSG00000032946	-1.1047	0.449523	0.014122	Rasgrp2	RAS, guanyl releasing protein 2
ENSMUSG00000053310	-1.10451	-0.811711	0.206627	Nrgn	neurogranin
ENSMUSG00000071770	-1.10397	0	-0.632156	Rhox4e	reproductive homeobox 4E
ENSMUSG00000027562	-1.10147	-1.0708	0.643203	Car2	carbonic anhydrase 2
ENSMUSG00000049577	-1.09747	0.00511397	0.585289	Zfpm1	zinc finger protein, multitype 1
ENSMUSG00000022820	-1.09709	0	0.0657257	Ndufb4	NADH:ubiquinone oxidoreductase subunit B4
ENSMUSG00000067924	-1.09679	1.13313	-0.461791	Rtl8b	retrotransposon Gag like 8B
ENSMUSG00000080887	-1.09633	0.0810263	0.85488	Gm14831	predicted gene 14831
ENSMUSG00000033721	-1.09633	0.481623	-0.620666	Vav3	vav 3 oncogene
ENSMUSG00000034557	-1.09633	0	-0.853357	Zfyve9	zinc finger, FYVE domain containing 9
ENSMUSG00000068466	-1.09549	0.599782	0.11661	Gm5518	predicted gene 5518
ENSMUSG00000003038	-1.09499	1.19157	0.52929	Hmgn2	high mobility group nucleosomal binding domain 2
ENSMUSG00000097253	-1.09468	0	0.383269	Gm26770	predicted gene, 26770
ENSMUSG00000048668	-1.09468	0	0.407291	Rhno1	RAD9-HUS1-RAD1 interacting nuclear orphan 1
ENSMUSG00000038572	-1.09397	0	-0.200151	Bpifb5	BPI fold containing family B, member 5
ENSMUSG00000023473	-1.09397	0.506311	-0.139574	Celsr3	cadherin, EGF LAG seven-pass G-type receptor 3
ENSMUSG00000058922	-1.09397	0	-0.123638	Gm10052	predicted pseudogene 10052
ENSMUSG00000082107	-1.09397	0	0	Gm16216	predicted gene 16216
ENSMUSG00000096520	-1.09397	0	0	Gm3376	predicted gene 3376
ENSMUSG00000046636	-1.09397	0	0.277397	Gm7729	predicted gene 7729
ENSMUSG00000025534	-1.09397	-0.0294223	0.384473	Gusb	glucuronidase, beta
ENSMUSG00000021927	-1.09397	0	0	Hnrnpa1l2-ps2	heterogeneous nuclear ribonucleoprotein A1-like 2, pseudogene 2
ENSMUSG00000018572	-1.09397	0.597398	0.605283	Phf23	PHD finger protein 23
ENSMUSG00000046748	-1.09397	0	0.618861	Tmem45a2	transmembrane protein 45A2
ENSMUSG00000069743	-1.09397	0.225625	-0.342772	Zfp820	zinc finger protein 820
ENSMUSG00000032405	-1.0905	0.302933	1.00982	Pias1	protein inhibitor of activated STAT 1
ENSMUSG00000029247	-1.08893	-0.128205	0.497309	Paics	phosphoribosylaminoimidazole carboxylase, phosphoribosylaminoribosylaminoimidazole, succinocarboxamide synthetase
ENSMUSG00000022280	-1.08838	0.264445	0.821312	Rnf19a	ring finger protein 19A
ENSMUSG00000030470	-1.08441	-0.197911	-0.138778	Csrp3	cysteine and glycine-rich protein 3
ENSMUSG00000092916	-1.08051	0	0	No assciated gene
ENSMUSG00000042265	-1.08026	0.724879	-0.100137	Trem1	triggering receptor expressed on myeloid cells 1
ENSMUSG00000097700	-1.07949	0.846905	-0.843568	Gm26738	predicted gene, 26738
ENSMUSG00000054469	-1.07949	0	-0.123638	Lclat1	lysocardiolipin acyltransferase 1
ENSMUSG00000024661	-1.07851	0.210845	-0.698134	Fth1	ferritin heavy polypeptide 1
ENSMUSG00000096944	-1.07387	0.545374	0.161249	No assciated gene
ENSMUSG00000059835	-1.07172	0.788724	-1.092	Rpl13-ps3	ribosomal protein L13, pseudogene 3
ENSMUSG00000090137	-1.07066	0.716337	0.664133	Uba52	ubiquitin A-52 residue ribosomal protein fusion product 1
ENSMUSG00000003033	-1.06906	0.294557	0.108563	Ap1m1	adaptor-related protein complex AP-1, mu subunit 1
ENSMUSG00000078291	-1.06771	0.052951	-0.251105	Gm3940	predicted gene 3940
ENSMUSG00000082292	-1.06745	0.113932	0.789009	Gm12250	predicted gene 12250
ENSMUSG00000030286	-1.06535	0.135081	-0.366377	Emc3	ER membrane protein complex subunit 3
ENSMUSG00000092312	-1.06406	0	0.0677677	Zfp419	zinc finger protein 419
ENSMUSG00000067719	-1.06364	-0.914206	0.731793	Gm10221	predicted gene 10221
ENSMUSG00000063445	-1.06273	0.141522	1.02662	Nmral1	NmrA-like family domain containing 1
ENSMUSG00000011958	-1.05804	0.445844	0.841092	Bnip2	BCL2/adenovirus E1B interacting protein 2
ENSMUSG00000090935	-1.05762	-0.56261	-0.0842176	Synj2bp	synaptojanin 2 binding protein
ENSMUSG00000027879	-1.05415	-0.750313	0.339	Sec22b	SEC22 homolog B, vesicle trafficking protein
ENSMUSG00000081929	-1.05298	-0.0482611	-0.222605	Rps11-ps2	ribosomal protein S11, pseudogene 2
ENSMUSG00000031754	-1.05228	0.454017	-0.223864	Nudt21	nudix hydrolase 21
ENSMUSG00000090733	-1.05119	1.10704	-0.622618	Rps27	ribosomal protein S27
ENSMUSG00000001445	-1.04944	-0.0664247	0.573016	Mrpl10	mitochondrial ribosomal protein L10
ENSMUSG00000085340	-1.04908	-0.0254809	0.270091	Gm16335	predicted gene 16335
ENSMUSG00000081331	-1.04717	0	0.163932	Gm15151	predicted gene 15151
ENSMUSG00000042354	-1.04677	0.321314	0.34779	Gnl3	guanine nucleotide binding protein-like 3 (nucleolar)
ENSMUSG00000020250	-1.04661	0.664924	0.92991	Txnrd1	thioredoxin reductase 1
ENSMUSG00000074516	-1.04476	0.428488	0.203981	Gm10709	predicted gene 10709
ENSMUSG00000089875	-1.04427	0.342028	-0.498857	Etohd2	ethanol decreased 2
ENSMUSG00000034793	-1.04384	0.100455	0.118708	G6pc3	glucose 6 phosphatase, catalytic, 3
ENSMUSG00000024953	-1.04298	0.503739	0.589447	Prdx5	peroxiredoxin 5
ENSMUSG00000007656	-1.04296	0	0.735353	Arpp19	cAMP-regulated phosphoprotein 19
ENSMUSG00000086714	-1.03994	1.00327	0.00789879	0610009E02Rik	RIKEN cDNA 0610009E02 gene
ENSMUSG00000095217	-1.03835	-0.999335	-0.20613	H2bc15	H2B clustered histone 15
ENSMUSG00000058159	-1.03615	0	0.293941	T2	brachyury 2
ENSMUSG00000003380	-1.03504	0.444583	-0.0302477	Rabac1	Rab acceptor 1 (prenylated)
ENSMUSG00000056666	-1.0348	0.0810263	-0.200227	Retsat	retinol saturase (all trans retinol 13,14 reductase)
ENSMUSG00000001403	-1.03412	-0.311044	0.241515	Ube2c	ubiquitin-conjugating enzyme E2C
ENSMUSG00000038886	-1.0339	0.498136	0.047108	Man2a2	mannosidase 2, alpha 2
ENSMUSG00000038280	-1.02738	0.360227	-0.384331	Ostm1	osteopetrosis associated transmembrane protein 1
ENSMUSG00000025939	-1.02559	0	-0.453729	Ube2w	ubiquitin-conjugating enzyme E2W (putative)
ENSMUSG00000097080	-1.02249	0	0.259409	1700086O06Rik	RIKEN cDNA 1700086O06 gene
ENSMUSG00000031297	-1.02013	0	-0.525977	Slc7a3	solute carrier family 7 (cationic amino acid transporter, y+ system), member 3
ENSMUSG00000009995	-1.01909	0.225772	-0.396587	Tafazzin	tafazzin, phospholipid-lysophospholipid transacylase
ENSMUSG00000035969	-1.01788	-0.789851	0.480625	Rusc2	RUN and SH3 domain containing 2
ENSMUSG00000038147	-1.01697	-0.521296	-0.0711601	Cd84	CD84 antigen
ENSMUSG00000034462	-1.01324	-0.235356	-0.634592	Pkd2	polycystin 2, transient receptor potential cation channel
ENSMUSG00000028029	-1.01253	0.0810263	0	Aimp1	aminoacyl tRNA synthetase complex-interacting multifunctional protein 1
ENSMUSG00000000409	-1.01177	-0.228214	-0.72938	Lck	lymphocyte protein tyrosine kinase
ENSMUSG00000027878	-1.00952	-0.0576508	-0.188857	Notch2	notch 2
ENSMUSG00000032212	-1.00952	0.0810263	-0.144637	Sltm	SAFB-like, transcription modulator
ENSMUSG00000094973	-1.00949	-0.309439	-0.411899	Eif4a3l1	eukaryotic translation initiation factor 4A3 like 1
ENSMUSG00000052291	-1.00258	0	0.367818	5330438D12Rik	RIKEN cDNA 5330438D12 gene
ENSMUSG00000009630	-1.00196	0.870551	-0.366353	Ppp2cb	protein phosphatase 2 (formerly 2A), catalytic subunit, beta isoform
ENSMUSG00000032119	-1.00096	0.173692	0.144496	Hinfp	histone H4 transcription factor
ENSMUSG00000025969	-1.00092	0	0.191539	Nrp2	neuropilin 2
ENSMUSG00000093112	-1.00011	-0.194354	0.413627	Gm22701	predicted gene, 22701
ENSMUSG00000087569	-0.998068	-0.565448	-0.0895	Actb-ps1	actin, beta, pseudogene 1
ENSMUSG00000059033	-0.997659	0.558996	0.176086	Rpl18a-ps1	ribosomal protein L18A, pseudogene 1
ENSMUSG00000006169	-0.99354	-0.263114	0.74011	Clint1	clathrin interactor 1
ENSMUSG00000033488	-0.992047	0.524993	-0.720556	Cryzl2	crystallin zeta like 2
ENSMUSG00000039617	-0.992047	0.730187	-0.205497	Gm7488	predicted gene 7488
ENSMUSG00000031239	-0.992047	-0.446909	0.603183	Itm2a	integral membrane protein 2A
ENSMUSG00000001844	-0.98745	0.0658236	0.576824	Zdhhc4	zinc finger, DHHC domain containing 4
ENSMUSG00000045210	-0.986241	0.181066	0.695677	Vcpip1	valosin containing protein (p97)/p47 complex interacting protein 1
ENSMUSG00000005483	-0.982894	0.539524	-0.568372	Dnajb1	DnaJ heat shock protein family (Hsp40) member B1
ENSMUSG00000081382	-0.982661	0.631343	0.568658	Rpl18-ps1	ribosomal protein L18, pseudogene 1
ENSMUSG00000039473	-0.982478	1.03794	-0.889524	Ubn1	ubinuclein 1
ENSMUSG00000042312	-0.978863	0.804124	0.485556	S100a13	S100 calcium binding protein A13
ENSMUSG00000084164	-0.975677	0.0810263	0.276136	Gm13902	predicted gene 13902
ENSMUSG00000031482	-0.975677	-0.317814	0	Slc25a15	solute carrier family 25 (mitochondrial carrier ornithine transporter), member 15
ENSMUSG00000028837	-0.974723	0.189816	0.661441	Psmb2	proteasome (prosome, macropain) subunit, beta type 2
ENSMUSG00000081308	-0.972986	-0.50752	0.0457531	Gm14480	predicted gene 14480
ENSMUSG00000070713	-0.971798	0.818576	0.711782	Hmgn2-ps	high mobility group nucleosomal binding domain 2, pseudogene
ENSMUSG00000021537	-0.965902	0	0.358243	Cetn3	centrin 3
ENSMUSG00000083261	-0.965902	0.189816	-0.330213	Gm7816	predicted pseudogene 7816
ENSMUSG00000004612	-0.96518	-0.242555	0.20182	Nkg7	natural killer cell group 7 sequence
ENSMUSG00000029064	-0.964946	1.12312	0.0303978	Gnb1	guanine nucleotide binding protein (G protein), beta 1
ENSMUSG00000000759	-0.96367	0.387401	0.690769	Tubgcp3	tubulin, gamma complex associated protein 3
ENSMUSG00000029605	-0.96018	0.468258	-0.0558454	Oas1b	2'-5' oligoadenylate synthetase 1B
ENSMUSG00000004642	-0.956121	0.365546	0.242767	Slbp	stem-loop binding protein
ENSMUSG00000027829	-0.955608	0.704233	-0.176718	Ccnl1	cyclin L1
ENSMUSG00000009418	-0.952845	0.0427924	-0.00475487	Nav1	neuron navigator 1
ENSMUSG00000036398	-0.950917	-0.167574	0.55897	Ppp1r11	protein phosphatase 1, regulatory inhibitor subunit 11
ENSMUSG00000031691	-0.950917	0	0.218725	Tnpo2	transportin 2 (importin 3, karyopherin beta 2b)
ENSMUSG00000024758	-0.950915	-0.10834	-0.346191	Rtn3	reticulon 3
ENSMUSG00000026743	-0.950045	-0.100471	-0.00652489	Mllt10	myeloid/lymphoid or mixed-lineage leukemia; translocated to, 10
ENSMUSG00000086693	-0.947218	0	0.0386456	A730081D07Rik	RIKEN cDNA A730081D07 gene
ENSMUSG00000081751	-0.943302	-0.707634	0.366966	Gm14251	predicted gene 14251
ENSMUSG00000056724	-0.940419	0.521099	-0.336777	Nbeal2	neurobeachin-like 2
ENSMUSG00000074497	-0.940419	0	-0.0915499	No assciated gene
ENSMUSG00000028945	-0.939791	-0.377149	-0.238954	Rheb	Ras homolog enriched in brain
ENSMUSG00000061272	-0.939349	-0.743146	0.309056	Gm14173	predicted gene 14173
ENSMUSG00000089705	-0.934417	0.167975	0.153933	Gm15970	predicted gene 15970
ENSMUSG00000040548	-0.932195	0.141522	0.254116	Tex2	testis expressed gene 2
ENSMUSG00000048758	-0.928756	0.286966	-0.169502	Rpl29	ribosomal protein L29
ENSMUSG00000001588	-0.925252	-0.214097	0.255115	Acap1	ArfGAP with coiled-coil, ankyrin repeat and PH domains 1
ENSMUSG00000052407	-0.925252	0	-0.086039	Ccdc171	coiled-coil domain containing 171
ENSMUSG00000044244	-0.925252	0	0.130234	Il20rb	interleukin 20 receptor beta
ENSMUSG00000080021	-0.923683	0.132737	-0.0476528	Gm5915	predicted pseudogene 5915
ENSMUSG00000006235	-0.922682	-0.0784107	-0.315305	Epor	erythropoietin receptor
ENSMUSG00000093064	-0.922195	0.259986	0.0409486	Gm23153	predicted gene, 23153
ENSMUSG00000082693	-0.920891	0	0	Gm15190	predicted gene 15190
ENSMUSG00000018449	-0.920891	0.475434	0.136521	Rpain	RPA interacting protein
ENSMUSG00000025651	-0.913525	-0.585232	0.353258	Uqcrc1	ubiquinol-cytochrome c reductase core protein 1
ENSMUSG00000031534	-0.911957	0.678923	0.0551759	Smim19	small integral membrane protein 19
ENSMUSG00000024742	-0.911341	0	0.140527	Fen1	flap structure specific endonuclease 1
ENSMUSG00000071181	-0.911247	0	-0.29508	3830408C21Rik	RIKEN cDNA 3830408C21 gene
ENSMUSG00000018924	-0.909636	0.230014	-0.196373	Alox15	arachidonate 15-lipoxygenase
ENSMUSG00000029723	-0.908906	0.826124	0.627299	Spacdr	sperm acrosome developmental regulator
ENSMUSG00000029186	-0.90833	0.111302	0.395661	Pi4k2b	phosphatidylinositol 4-kinase type 2 beta
ENSMUSG00000001105	-0.907591	-0.158992	-0.2402	Ift20	intraflagellar transport 20
ENSMUSG00000066621	-0.905695	0.369929	-0.059399	Tecpr1	tectonin beta-propeller repeat containing 1
ENSMUSG00000071451	-0.9056	0.34539	-0.0734347	Psmg4	proteasome (prosome, macropain) assembly chaperone 4
ENSMUSG00000024213	-0.901268	0.66356	-0.303332	Nudt3	nudix hydrolase 3
ENSMUSG00000085198	-0.900406	0	0.207145	4933416E03Rik	RIKEN cDNA 4933416E03 gene
ENSMUSG00000078307	-0.900406	0.141522	-0.531095	AI593442	expressed sequence AI593442
ENSMUSG00000031755	-0.900406	0	-0.376075	Bbs2	Bardet-Biedl syndrome 2 (human)
ENSMUSG00000048186	-0.900406	0	0.168078	Bend7	BEN domain containing 7
ENSMUSG00000028532	-0.900406	0	0.276944	Cachd1	cache domain containing 1
ENSMUSG00000049957	-0.900406	0	-0.21946	Ccdc137	coiled-coil domain containing 137
ENSMUSG00000025370	-0.900406	0.0810263	0.514714	Cdh9	cadherin 9
ENSMUSG00000020462	-0.900406	0.230014	-0.143964	Cfap36	cilia and flagella associated protein 36
ENSMUSG00000047230	-0.900406	0.0810263	-0.0906631	Cldn2	claudin 2
ENSMUSG00000034807	-0.900406	0.40584	0.0164803	Colgalt1	collagen beta(1-O)galactosyltransferase 1
ENSMUSG00000026870	-0.900406	0	0	Cutal	cutA divalent cation tolerance homolog-like
ENSMUSG00000027613	-0.900406	-0.131019	0.217931	Eif6	eukaryotic translation initiation factor 6
ENSMUSG00000033837	-0.900406	0	-0.505076	Foxh1	forkhead box H1
ENSMUSG00000027680	-0.900406	0.871242	0.445648	Fxr1	FMR1 autosomal homolog 1
ENSMUSG00000023147	-0.900406	0.141522	0.387469	Get1	guided entry of tail-anchored proteins factor 1
ENSMUSG00000041440	-0.900406	0.708392	0.179419	Gk5	glycerol kinase 5 (putative)
ENSMUSG00000066176	-0.900406	0	0.140527	Gm12511	predicted gene 12511
ENSMUSG00000082277	-0.900406	0	0	Gm15807	predicted gene 15807
ENSMUSG00000091514	-0.900406	0	-0.361608	Gm17484	predicted gene, 17484
ENSMUSG00000097183	-0.900406	0	-0.0168921	Gm17501	predicted gene, 17501
ENSMUSG00000093427	-0.900406	0	0	Gm18513	predicted gene, 18513
ENSMUSG00000010825	-0.900406	-0.194354	-0.240381	Grid2ip	glutamate receptor, ionotropic, delta 2 (Grid2) interacting protein 1
ENSMUSG00000026985	-0.900406	0	0.47693	Il36b	interleukin 36B
ENSMUSG00000031337	-0.900406	0.245878	-0.487025	Mtm1	X-linked myotubular myopathy gene 1
ENSMUSG00000044597	-0.900406	-0.317814	0	Mycs	myc-like oncogene, s-myc protein
ENSMUSG00000064548	-0.900406	-0.390736	-0.096557	n-R5s65	nuclear encoded rRNA 5S 65
ENSMUSG00000097076	-0.900406	0	-0.393662	Platr7	pluripotency associated transcript 7
ENSMUSG00000083907	-0.900406	0	0.166673	Plk-ps1	polo like kinase, pseudogene 1
ENSMUSG00000034126	-0.900406	0.141522	0.456169	Pomt2	protein-O-mannosyltransferase 2
ENSMUSG00000097754	-0.900406	0	0.277397	Ptgs2os2	prostaglandin-endoperoxide synthase 2, opposite strand 2
ENSMUSG00000082895	-0.900406	-0.469304	0.0648866	Rpsa-ps9	ribosomal protein SA, pseudogene 9
ENSMUSG00000033228	-0.900406	1.06677	0.357116	Scaf11	SR-related CTD-associated factor 11
ENSMUSG00000042268	-0.900406	0	0.0471775	Slc26a9	solute carrier family 26, member 9
ENSMUSG00000001280	-0.900406	-0.153507	0.17504	Sp1	trans-acting transcription factor 1
ENSMUSG00000086219	-0.900406	0	0	Srrm4os	serine/arginine repetitive matrix 4, opposite strand
ENSMUSG00000061702	-0.900406	0	0.0932781	Tmem91	transmembrane protein 91
ENSMUSG00000053388	-0.900406	0	0	Trim50	tripartite motif-containing 50
ENSMUSG00000001891	-0.900406	0.654131	0.488997	Ugp2	UDP-glucose pyrophosphorylase 2
ENSMUSG00000062417	-0.900406	0	-0.224024	No assciated gene
ENSMUSG00000077967	-0.900406	0.0810263	-0.096557	No assciated gene
ENSMUSG00000080345	-0.900406	0	-0.200378	No assciated gene
ENSMUSG00000099193	-0.900406	0	0.136521	No assciated gene
ENSMUSG00000081405	-0.899071	0.0159167	-0.222316	Gm13142	predicted gene 13142
ENSMUSG00000099019	-0.899071	0	0.18222	Gm27254	predicted gene 27254
ENSMUSG00000027187	-0.896118	-0.59524	0.0552192	Cat	catalase
ENSMUSG00000074564	-0.892849	0.937203	0.0656655	Gm10720	predicted gene 10720
ENSMUSG00000042744	-0.891935	-0.548044	-0.117708	Hectd4	HECT domain E3 ubiquitin protein ligase 4
ENSMUSG00000083483	-0.889264	0.778398	-0.479063	Gm14044	predicted gene 14044
ENSMUSG00000085371	-0.886257	0	0	Gm3160	predicted pseudogene 3160
ENSMUSG00000030226	-0.884977	0.141522	-0.326503	Lmo3	LIM domain only 3
ENSMUSG00000096003	-0.884051	0.230014	0.064105	Gm3500	predicted gene 3500
ENSMUSG00000028849	-0.884051	1.01908	-0.150554	Map7d1	MAP7 domain containing 1
ENSMUSG00000033967	-0.884051	0	0.0168895	Rnf225	ring finger protein 225
ENSMUSG00000036002	-0.879336	0.487496	-0.0353943	Atosb	atos homolog B
ENSMUSG00000021890	-0.879064	0.911098	0.4004	Eaf1	ELL associated factor 1
ENSMUSG00000094627	-0.872847	1.10895	0.559522	Gm10182	predicted pseudogene 10182
ENSMUSG00000039601	-0.872847	-0.0576508	0.166673	Rcan2	regulator of calcineurin 2
ENSMUSG00000039367	-0.867692	0.291171	0.242493	Sec24c	SEC24 homolog C, COPII coat complex component
ENSMUSG00000082947	-0.859535	0	0	Gm12587	predicted gene 12587
ENSMUSG00000024491	-0.85342	0.141522	0.181007	Rbm27	RNA binding motif protein 27
ENSMUSG00000095595	-0.847857	0.573523	-0.218344	Fam177a	family with sequence similarity 177, member A
ENSMUSG00000025316	-0.829784	0.731125	-0.0624136	Banp	BTG3 associated nuclear protein
ENSMUSG00000044751	-0.829355	0.230014	0.112857	Atp5pb-ps	ATP synthase peripheral stalk-membrane subunit b, pseudogene
ENSMUSG00000022106	-0.829186	0.601167	0.336543	Rcbtb2	regulator of chromosome condensation (RCC1) and BTB (POZ) domain containing protein 2
ENSMUSG00000046620	-0.821392	0.507697	-0.170236	Rps11-ps4	ribosomal protein S11, pseudogene 4
ENSMUSG00000024986	-0.809769	0.511144	0.229921	Hhex	hematopoietically expressed homeobox
ENSMUSG00000073616	-0.798837	0.795314	0.336766	Cops9	COP9 signalosome subunit 9
ENSMUSG00000081715	-0.798837	0.307527	-0.169992	Rps11-ps3	ribosomal protein S11, pseudogene 3
ENSMUSG00000082424	-0.788621	0.662017	-0.14378	Gm13292	predicted gene 13292

## Sheet: Cluster 2
Gene ID	Day 4	Day 7	Day 35	Gene Symbol	Gene name
ENSMUSG00000036257	-0.608226	-5.28417	-0.222723	Pnpla8	patatin-like phospholipase domain containing 8
ENSMUSG00000001918	1.20183	-4.63892	1.07287	Slc1a5	solute carrier family 1 (neutral amino acid transporter), member 5
ENSMUSG00000059923	1.25792	-4.36148	-1.60577	Grb2	growth factor receptor bound protein 2
ENSMUSG00000062054	0.738419	-3.99431	-0.468394	Iah1	isoamyl acetate-hydrolyzing esterase 1 homolog
ENSMUSG00000022781	-1.37765	-3.98816	0.438299	Pak2	p21 (RAC1) activated kinase 2
ENSMUSG00000016252	1.44274	-3.9789	0.654394	Atp5e	ATP synthase, H+ transporting, mitochondrial F1 complex, epsilon subunit
ENSMUSG00000055850	0.426842	-3.96712	-1.84516	Rnf181	ring finger protein 181
ENSMUSG00000028277	1.4087	-3.93438	1.63075	Ube2j1	ubiquitin-conjugating enzyme E2J 1
ENSMUSG00000052296	1.37702	-3.92375	1.31288	Ppp6r1	protein phosphatase 6, regulatory subunit 1
ENSMUSG00000037234	-3.46338	-3.89992	-0.802562	Hook3	hook microtubule tethering protein 3
ENSMUSG00000050675	1.33248	-3.8922	0.711298	Gp1ba	glycoprotein 1b, alpha polypeptide
ENSMUSG00000038369	0.202604	-3.75497	0.228605	Ncoa6	nuclear receptor coactivator 6
ENSMUSG00000029153	1.51641	-3.75345	-0.171884	Ociad2	OCIA domain containing 2
ENSMUSG00000010277	2.01661	-3.67777	0.920267	Bltp2	bridge-like lipid transfer protein family member 2
ENSMUSG00000040351	-1.9844	-3.54924	0.217586	Ankib1	ankyrin repeat and IBR domain containing 1
ENSMUSG00000031166	1.35968	-3.45444	1.63405	Wdr13	WD repeat domain 13
ENSMUSG00000063015	-0.368259	-3.43292	-0.366103	Ccni	cyclin I
ENSMUSG00000027306	1.5315	-3.4108	0.221634	Nusap1	nucleolar and spindle associated protein 1
ENSMUSG00000020034	-2.2596	-3.40786	3.10154	Tcp11l2	t-complex 11 (mouse) like 2
ENSMUSG00000036779	1.26331	-3.3849	0.126652	Tent4b	terminal nucleotidyltransferase 4B
ENSMUSG00000036299	1.57219	-3.38141	1.96953	BC031181	cDNA sequence BC031181
ENSMUSG00000025509	-0.533345	-3.3701	2.19468	Pnpla2	patatin-like phospholipase domain containing 2
ENSMUSG00000025220	1.35466	-3.34923	0.375598	Oga	O-GlcNAcase
ENSMUSG00000020340	1.58884	-3.33947	-1.76382	Cyfip2	cytoplasmic FMR1 interacting protein 2
ENSMUSG00000020955	2.54087	-3.28177	-0.775442	Ap4s1	adaptor-related protein complex AP-4, sigma 1
ENSMUSG00000054720	-0.615621	-3.24345	-0.851515	Lrrc8c	leucine rich repeat containing 8 family, member C
ENSMUSG00000057522	-1.42948	-3.22235	-0.430982	Spop	speckle-type BTB/POZ protein
ENSMUSG00000030189	2.34044	-3.21572	-1.34526	Ybx3	Y box protein 3
ENSMUSG00000001472	2.13274	-3.21385	-2.16774	Tcf25	transcription factor 25 (basic helix-loop-helix)
ENSMUSG00000023927	-0.357451	-3.21113	2.1123	Satb1	special AT-rich sequence binding protein 1
ENSMUSG00000034664	-0.0460729	-3.15291	-0.572595	Itga2b	integrin alpha 2b
ENSMUSG00000055912	-0.15135	-3.14335	-1.73007	Tmem150a	transmembrane protein 150A
ENSMUSG00000020516	1.95584	-3.08307	0.481156	Rps6kb1	ribosomal protein S6 kinase, polypeptide 1
ENSMUSG00000029761	-0.687253	-3.07496	0.337695	Cald1	caldesmon 1
ENSMUSG00000061607	-1.06909	-3.06544	0.780964	Mdc1	mediator of DNA damage checkpoint 1
ENSMUSG00000032034	2.7547	-3.03556	-1.21316	Kcnj5	potassium inwardly-rectifying channel, subfamily J, member 5
ENSMUSG00000021843	-0.235468	-3.02861	-0.7	Ktn1	kinectin 1
ENSMUSG00000051695	-0.395822	-3.0175	-0.511538	Pcbp1	poly(rC) binding protein 1
ENSMUSG00000029190	0.575844	-3.01136	0.238868	D5Ertd579e	DNA segment, Chr 5, ERATO Doi 579, expressed
ENSMUSG00000056579	0.413646	-2.98992	-0.363751	Tug1	taurine upregulated gene 1
ENSMUSG00000019998	0.829128	-2.98907	-0.200786	Stx7	syntaxin 7
ENSMUSG00000086922	0.673511	-2.98514	-0.771708	Gm13835	predicted gene 13835
ENSMUSG00000036352	2.0081	-2.97368	-1.06351	Ubac1	ubiquitin associated domain containing 1
ENSMUSG00000031029	2.71097	-2.96534	-1.25127	Eif3f	eukaryotic translation initiation factor 3, subunit F
ENSMUSG00000023944	-0.773712	-2.95439	-0.644646	Hsp90ab1	heat shock protein 90 alpha (cytosolic), class B member 1
ENSMUSG00000002015	-0.275468	-2.94541	-0.0222149	Bcap31	B cell receptor associated protein 31
ENSMUSG00000056476	1.35805	-2.90797	-2.92063	Med12l	mediator complex subunit 12-like
ENSMUSG00000021025	1.66592	-2.90516	0.203334	Nfkbia	nuclear factor of kappa light polypeptide gene enhancer in B cells inhibitor, alpha
ENSMUSG00000024639	1.66765	-2.88331	0.578948	Gnaq	guanine nucleotide binding protein, alpha q polypeptide
ENSMUSG00000082331	0.946414	-2.88115	-0.121852	No assciated gene
ENSMUSG00000047888	-0.35836	-2.86992	-1.37589	Tnrc6b	trinucleotide repeat containing 6b
ENSMUSG00000030303	0.834271	-2.86337	0.357649	Far2	fatty acyl CoA reductase 2
ENSMUSG00000030878	-0.637009	-2.81797	0.789213	Cdr2	cerebellar degeneration-related 2
ENSMUSG00000043557	0.74118	-2.8171	-1.81039	Mdga1	MAM domain containing glycosylphosphatidylinositol anchor 1
ENSMUSG00000037971	-0.457054	-2.78407	-1.63611	Cfap68	cilia and flagella associated protein 68
ENSMUSG00000025132	0.981491	-2.77888	-1.18541	Arhgdia	Rho GDP dissociation inhibitor (GDI) alpha
ENSMUSG00000081176	-0.312295	-2.77861	-0.958595	H3f3a-ps2	H3.3 histone A, pseudogene 2
ENSMUSG00000056091	0.453186	-2.75884	0.26965	St3gal5	ST3 beta-galactoside alpha-2,3-sialyltransferase 5
ENSMUSG00000026035	-0.190085	-2.75585	0.12835	Ppil3	peptidylprolyl isomerase (cyclophilin)-like 3
ENSMUSG00000024404	0.596473	-2.74033	-0.370764	Riok3	RIO kinase 3
ENSMUSG00000036390	0.654257	-2.73853	-1.54009	Gadd45a	growth arrest and DNA-damage-inducible 45 alpha
ENSMUSG00000059824	0.0657763	-2.73826	0.374495	Dbp	D site albumin promoter binding protein
ENSMUSG00000045767	1.10693	-2.72494	-1.10343	B230219D22Rik	RIKEN cDNA B230219D22 gene
ENSMUSG00000089764	1.66546	-2.70998	-0.749496	Gm16580	predicted gene 16580
ENSMUSG00000060096	0.069556	-2.70248	-0.28157	Amd-ps3	S-adenosylmethionine decarboxylase, pseudogene 3
ENSMUSG00000020594	0.916241	-2.69636	-0.414645	Pum2	pumilio RNA-binding family member 2
ENSMUSG00000022897	2.91803	-2.69052	-0.171108	Dyrk1a	dual-specificity tyrosine-(Y)-phosphorylation regulated kinase 1a
ENSMUSG00000017837	0.74118	-2.68705	-0.893829	Nkiras2	NFKB inhibitor interacting Ras-like protein 2
ENSMUSG00000045427	0.941463	-2.67525	-0.702438	Hnrnph2	heterogeneous nuclear ribonucleoprotein H2
ENSMUSG00000057342	-0.00731311	-2.66262	-0.163402	Sphk2	sphingosine kinase 2
ENSMUSG00000084005	0.946414	-2.65879	0.0315607	No assciated gene
ENSMUSG00000036707	2.09091	-2.64235	-0.132422	Cab39	calcium binding protein 39
ENSMUSG00000020528	-0.192669	-2.63646	-0.168765	Prpsap2	phosphoribosyl pyrophosphate synthetase-associated protein 2
ENSMUSG00000063953	-0.456787	-2.63342	0.819157	Amd2	S-adenosylmethionine decarboxylase 2
ENSMUSG00000026578	0.171874	-2.61968	0.283558	Ccdc181	coiled-coil domain containing 181
ENSMUSG00000097263	0.18424	-2.58922	-0.476228	No assciated gene
ENSMUSG00000075232	-0.71588	-2.57888	0.868361	Amd1	S-adenosylmethionine decarboxylase 1
ENSMUSG00000063146	-0.640969	-2.577	-0.388445	Clip2	CAP-GLY domain containing linker protein 2
ENSMUSG00000008690	0	-2.56144	0.136416	Ncaph2	non-SMC condensin II complex, subunit H2
ENSMUSG00000043424	0.808507	-2.55762	-2.20481	Eif3j2	eukaryotic translation initiation factor 3, subunit J2
ENSMUSG00000040078	0.507567	-2.54893	-2.03528	Ptges3-ps	prostaglandin E synthase 3, pseudogene
ENSMUSG00000020368	-1.4112	-2.54575	0.749078	Canx	calnexin
ENSMUSG00000004552	2.07074	-2.54155	-0.537509	Ctse	cathepsin E
ENSMUSG00000020961	1.41914	-2.53627	0.0674542	Ston2	stonin 2
ENSMUSG00000014905	-0.398661	-2.4994	0.535104	Dnajb9	DnaJ heat shock protein family (Hsp40) member B9
ENSMUSG00000026880	-0.722869	-2.4885	-0.45329	Stom	stomatin
ENSMUSG00000024761	1.19666	-2.47478	-0.500517	Gm16437	predicted pseudogene 16437
ENSMUSG00000003161	-1.19107	-2.47281	0.733868	Sri	sorcin
ENSMUSG00000096935	-0.677491	-2.4698	-1.11929	1700113A16Rik	RIKEN cDNA 1700113A16 gene
ENSMUSG00000007880	-1.66721	-2.4587	-1.23409	Arid1a	AT rich interactive domain 1A (SWI-like)
ENSMUSG00000028437	-1.02626	-2.43071	1.0931	Ubap1	ubiquitin-associated protein 1
ENSMUSG00000016257	0.672385	-2.42283	0.0703948	Prelid3b	PRELI domain containing 3B
ENSMUSG00000053965	0.0772748	-2.42184	-1.79178	Pde5a	phosphodiesterase 5A, cGMP-specific
ENSMUSG00000085438	-1.1346	-2.41129	-0.265234	Oip5os1	Opa interacting protein 5, opposite strand 1
ENSMUSG00000019836	-0.41284	-2.40885	0.0323214	Amd-ps4	S-adenosylmethionine decarboxylase, pseudogene 4
ENSMUSG00000035781	-1.19045	-2.40466	0.00127191	R3hdm4	R3H domain containing 4
ENSMUSG00000022982	-0.426239	-2.40449	1.07964	Sod1	superoxide dismutase 1, soluble
ENSMUSG00000026436	-0.30956	-2.40434	-0.595211	Elk4	ELK4, member of ETS oncogene family
ENSMUSG00000032766	-0.219689	-2.39602	-0.739275	Gng11	guanine nucleotide binding protein (G protein), gamma 11
ENSMUSG00000024293	0.559647	-2.39538	0.625541	Esco1	establishment of sister chromatid cohesion N-acetyltransferase 1
ENSMUSG00000001419	-0.677491	-2.39286	-1.4875	Mef2d	myocyte enhancer factor 2D
ENSMUSG00000021188	1.14535	-2.38025	0.99938	Trip11	thyroid hormone receptor interactor 11
ENSMUSG00000029209	0.806376	-2.37951	1.09298	Gnpda2	glucosamine-6-phosphate deaminase 2
ENSMUSG00000025825	-0.829247	-2.3792	-0.218361	Iscu	iron-sulfur cluster assembly enzyme
ENSMUSG00000030824	2.17766	-2.35869	0.236332	Nucb1	nucleobindin 1
ENSMUSG00000027236	0.987454	-2.34905	-1.05949	Eif3j1	eukaryotic translation initiation factor 3, subunit J1
ENSMUSG00000018326	2.0421	-2.34206	0.140196	Ywhab	tyrosine 3-monooxygenase/tryptophan 5-monooxygenase activation protein, beta polypeptide
ENSMUSG00000078087	2.66385	-2.33868	1.01419	Rps12l1	ribosomal protein S12-like 1
ENSMUSG00000028108	-1.8872	-2.33323	-0.582409	Ecm1	extracellular matrix protein 1
ENSMUSG00000029763	0.228339	-2.32591	1.17643	Exoc4	exocyst complex component 4
ENSMUSG00000043391	1.78038	-2.32208	-0.0733864	2510009E07Rik	RIKEN cDNA 2510009E07 gene
ENSMUSG00000022100	2.05557	-2.3128	1.90265	Xpo7	exportin 7
ENSMUSG00000019659	0.900684	-2.31175	-0.803588	Ccdc12	coiled-coil domain containing 12
ENSMUSG00000097906	-2.00571	-2.30452	-2.27612	Gm9625	predicted gene 9625
ENSMUSG00000061882	0.347704	-2.30359	0.522683	Ccdc62	coiled-coil domain containing 62
ENSMUSG00000027957	0.168716	-2.29017	-0.0755905	Slc35a3	solute carrier family 35 (UDP-N-acetylglucosamine (UDP-GlcNAc) transporter), member 3
ENSMUSG00000067038	2.77542	-2.2893	0.910248	Rps12-ps3	ribosomal protein S12, pseudogene 3
ENSMUSG00000091479	1.12316	-2.28527	-0.954532	Gm17035	predicted gene 17035
ENSMUSG00000053334	-0.176099	-2.28448	0.884431	Ficd	FIC domain containing
ENSMUSG00000050761	0.413181	-2.27388	0.0334194	Gp1bb	glycoprotein Ib, beta polypeptide
ENSMUSG00000028273	0.359768	-2.2716	-0.487197	Pdlim5	PDZ and LIM domain 5
ENSMUSG00000001942	0.347826	-2.2695	0.530696	Siae	sialic acid acetylesterase
ENSMUSG00000026867	0.232232	-2.26825	1.89211	Gapvd1	GTPase activating protein and VPS9 domains 1
ENSMUSG00000015839	1.85422	-2.2639	1.20075	Nfe2l2	nuclear factor, erythroid derived 2, like 2
ENSMUSG00000020589	1.58332	-2.26381	-0.0169468	Cyria	CYFIP related Rac1 interactor A
ENSMUSG00000031938	0.656476	-2.26296	0.0734985	4931406C07Rik	RIKEN cDNA 4931406C07 gene
ENSMUSG00000067351	0.615516	-2.26198	-0.402373	Rps15a-ps2	ribosomal protein S15A, pseudogene 2
ENSMUSG00000037940	1.24554	-2.25493	-1.51492	Inpp4b	inositol polyphosphate-4-phosphatase, type II
ENSMUSG00000057945	0.120403	-2.25119	-0.460185	Gm17136	predicted gene 17136
ENSMUSG00000032381	-0.348956	-2.24781	-1.18869	Ciao2a	cytosolic iron-sulfur assembly component 2A
ENSMUSG00000050079	-0.696521	-2.24637	0.237888	Rspry1	ring finger and SPRY domain containing 1
ENSMUSG00000022139	0.777394	-2.24531	0.925384	Mbnl2	muscleblind like splicing factor 2
ENSMUSG00000029922	1.70029	-2.23735	-0.751521	Mkrn1	makorin, ring finger protein, 1
ENSMUSG00000028639	-0.0470959	-2.22527	1.1729	Ybx1	Y box protein 1
ENSMUSG00000021908	0.630889	-2.21707	-0.526964	Ncoa4-ps	nuclear receptor coactivator 4, pseudogene
ENSMUSG00000072460	-0.762901	-2.21012	1.14197	Atp5l-ps1	ATP synthase, H+ transporting, mitochondrial F0 complex, subunit G, pseudogene 1
ENSMUSG00000096255	-1.39858	-2.20104	0.872726	Dynlt1b	dynein light chain Tctex-type 1B
ENSMUSG00000002458	-0.393862	-2.19451	1.2166	Rgs19	regulator of G-protein signaling 19
ENSMUSG00000005054	0	-2.18522	0.321471	Cstb	cystatin B
ENSMUSG00000023031	-0.186885	-2.18328	-0.0649557	Cela1	chymotrypsin-like elastase family, member 1
ENSMUSG00000079469	0.443744	-2.18075	-2.39308	Pigb	phosphatidylinositol glycan anchor biosynthesis, class B
ENSMUSG00000006058	-0.6352	-2.17881	-1.19878	Snf8	SNF8, ESCRT-II complex subunit, homolog (S. cerevisiae)
ENSMUSG00000082880	0.352525	-2.17659	-0.135112	No assciated gene
ENSMUSG00000061983	2.57101	-2.17072	1.35898	Rps12	ribosomal protein S12
ENSMUSG00000035629	-0.234176	-2.16328	0.259093	Rubcn	RUN domain and cysteine-rich domain containing, Beclin 1-interacting protein
ENSMUSG00000035107	1.27784	-2.15978	-0.558702	Dcbld2	discoidin, CUB and LCCL domain containing 2
ENSMUSG00000047246	-0.363248	-2.15951	-0.465787	H2bc6	H2B clustered histone 6
ENSMUSG00000019843	2.67369	-2.15531	0.159749	Fyn	Fyn proto-oncogene
ENSMUSG00000000787	0.548766	-2.15053	-0.819358	Ddx3x	DEAD box helicase 3, X-linked
ENSMUSG00000006262	1.04384	-2.14845	-0.287015	Mob1b	MOB kinase activator 1B
ENSMUSG00000032386	2.13296	-2.14799	-0.782345	Trip4	thyroid hormone receptor interactor 4
ENSMUSG00000064356	1.42884	-2.14629	-0.165042	mt-Atp8	mitochondrially encoded ATP synthase 8
ENSMUSG00000043065	0.619414	-2.145	0.945077	Spice1	spindle and centriole associated protein 1
ENSMUSG00000025982	0.915593	-2.14322	2.27256	Sf3b1	splicing factor 3b, subunit 1
ENSMUSG00000031162	0.410779	-2.13179	-0.136903	Gata1	GATA binding protein 1
ENSMUSG00000015671	-0.57771	-2.13085	-0.471218	Psma2	proteasome subunit alpha 2
ENSMUSG00000060147	0.872895	-2.12467	0.00217536	Serpinb6a	serine (or cysteine) peptidase inhibitor, clade B, member 6a
ENSMUSG00000056234	0.598412	-2.10717	-0.529909	Ncoa4	nuclear receptor coactivator 4
ENSMUSG00000029270	-0.389761	-2.1068	0.768363	Dipk1a	divergent protein kinase domain 1A
ENSMUSG00000076870	1.46268	-2.10336	-0.174391	Trdj1	T cell receptor delta joining 1
ENSMUSG00000075286	0.181992	-2.09791	-0.9537	Gm1968	predicted gene 1968
ENSMUSG00000087269	0	-2.09511	-0.252712	D330023K18Rik	RIKEN cDNA D330023K18 gene
ENSMUSG00000038784	-0.0459717	-2.09445	-1.09483	Cnot4	CCR4-NOT transcription complex, subunit 4
ENSMUSG00000014198	0	-2.09227	-0.320726	Zfp385c	zinc finger protein 385C
ENSMUSG00000098043	-0.0497459	-2.08302	-1.34138	Gm26980	predicted gene, 26980
ENSMUSG00000027404	2.39742	-2.07726	0.0665816	Snrpb	small nuclear ribonucleoprotein B
ENSMUSG00000060989	-2.04425	-2.07676	-0.467373	Gm11847	predicted gene 11847
ENSMUSG00000006389	-0.300622	-2.07621	-0.485167	Mpl	myeloproliferative leukemia virus oncogene
ENSMUSG00000035637	0.235796	-2.07226	-0.248319	Grhpr	glyoxylate reductase/hydroxypyruvate reductase
ENSMUSG00000064355	-0.925165	-2.06226	-1.07656	mt-Tk	mitochondrially encoded tRNA lysine
ENSMUSG00000006310	-0.0694173	-2.062	-0.287763	Zbtb32	zinc finger and BTB domain containing 32
ENSMUSG00000037286	-0.893912	-2.05646	-0.806974	Stag1	stromal antigen 1
ENSMUSG00000037062	2.15984	-2.04549	0.794253	Sh3glb1	SH3-domain GRB2-like B1 (endophilin)
ENSMUSG00000027860	-0.0677427	-2.03713	-0.367474	Vangl1	VANGL planar cell polarity 1
ENSMUSG00000020696	1.37947	-2.03668	-0.0909231	Rffl	ring finger and FYVE like domain containing protein
ENSMUSG00000029925	1.62406	-2.03419	-0.808278	Tbxas1	thromboxane A synthase 1, platelet
ENSMUSG00000057098	0.128254	-2.03208	-0.672261	Ebf1	early B cell factor 1
ENSMUSG00000061665	0.207446	-2.03007	0.856283	Cd2ap	CD2-associated protein
ENSMUSG00000020230	0.610432	-2.02673	-0.944752	Prmt2	protein arginine N-methyltransferase 2
ENSMUSG00000046707	0	-2.02267	0.319117	Csnk2a2	casein kinase 2, alpha prime polypeptide
ENSMUSG00000092086	-1.86807	-2.02213	-0.315236	Gm6793	predicted gene 6793
ENSMUSG00000031402	-0.277183	-2.02213	-0.505031	Mpp1	membrane protein, palmitoylated
ENSMUSG00000029208	1.24183	-2.01741	0.488181	Guf1	GUF1 homolog, GTPase
ENSMUSG00000050075	0.168716	-2.01341	-0.101588	Gpr171	G protein-coupled receptor 171
ENSMUSG00000042444	-0.990476	-2.00847	0.609374	Mindy2	MINDY lysine 48 deubiquitinase 2
ENSMUSG00000039879	1.24475	-2.00546	-0.770389	Heca	hdc homolog, cell cycle regulator
ENSMUSG00000003660	0.379463	-1.99608	0.711995	Snrnp200	small nuclear ribonucleoprotein 200 (U5)
ENSMUSG00000022051	0.807092	-1.99242	0.3383	Bnip3l	BCL2/adenovirus E1B interacting protein 3-like
ENSMUSG00000024096	0.358375	-1.99069	-1.32333	Ralbp1	ralA binding protein 1
ENSMUSG00000030890	0.819926	-1.97502	0.55537	Ilk	integrin linked kinase
ENSMUSG00000043866	0.823589	-1.97495	0.555692	Taf10	TATA-box binding protein associated factor 10
ENSMUSG00000069862	2.02008	-1.97363	0.942149	Rps12-ps9	ribosomal protein S12, pseudogene 9
ENSMUSG00000032116	0.209012	-1.97134	-1.00213	Stt3a	STT3, subunit of the oligosaccharyltransferase complex, homolog A (S. cerevisiae)
ENSMUSG00000059179	-0.721712	-1.96939	0.223497	Gm8991	predicted pseudogene 8991
ENSMUSG00000028572	0.289119	-1.96717	-1.20428	Hook1	hook microtubule tethering protein 1
ENSMUSG00000029068	-0.428309	-1.96698	-0.543086	Ccnl2	cyclin L2
ENSMUSG00000052593	0.652329	-1.9662	-0.633717	Adam17	a disintegrin and metallopeptidase domain 17
ENSMUSG00000087261	0.937528	-1.96567	0.0962591	Gm15477	predicted gene 15477
ENSMUSG00000089365	-0.205566	-1.96425	1.43546	No assciated gene
ENSMUSG00000095677	-1.81199	-1.96284	1.18153	Dynlt1f	dynein light chain Tctex-type 1F
ENSMUSG00000034158	-0.955988	-1.96198	0.382176	Lrrc58	leucine rich repeat containing 58
ENSMUSG00000040380	0.712589	-1.96106	0.932726	Cbln3	cerebellin 3 precursor protein
ENSMUSG00000074071	0.640152	-1.95827	0.133944	Fam169b	family with sequence similarity 169, member B
ENSMUSG00000000346	0.0224475	-1.95664	0.13082	Dazap2	DAZ associated protein 2
ENSMUSG00000042476	0.467721	-1.95647	-1.47941	Abcb4	ATP-binding cassette, sub-family B (MDR/TAP), member 4
ENSMUSG00000059775	1.88116	-1.95371	0.840937	Rps26-ps1	ribosomal protein S26, pseudogene 1
ENSMUSG00000093826	1.82678	-1.94714	-0.319013	Gm6900	predicted gene 6900
ENSMUSG00000074797	0	-1.94414	0.40076	Itpa	inosine triphosphatase (nucleoside triphosphate pyrophosphatase)
ENSMUSG00000043190	0.120403	-1.93624	1.3092	Rfesd	Rieske (Fe-S) domain containing
ENSMUSG00000036550	0.261902	-1.9265	0.645784	Cnot1	CCR4-NOT transcription complex, subunit 1
ENSMUSG00000027330	1.65264	-1.92441	0.355494	Cdc25b	cell division cycle 25B
ENSMUSG00000038250	0.462811	-1.92343	-1.93336	Usp38	ubiquitin specific peptidase 38
ENSMUSG00000045316	0.120403	-1.91973	0.600011	Fahd1	fumarylacetoacetate hydrolase domain containing 1
ENSMUSG00000078515	-0.360444	-1.91965	0.828404	Ddi2	DNA-damage inducible protein 2
ENSMUSG00000018659	1.12829	-1.91561	-2.20709	Pnpo	pyridoxine 5'-phosphate oxidase
ENSMUSG00000019802	-0.195922	-1.91156	0.214964	Sec63	SEC63 homolog, protein translocation regulator
ENSMUSG00000022553	0.536318	-1.91098	-1.70822	Maf1	MAF1 homolog, negative regulator of RNA polymerase III
ENSMUSG00000028234	0.388253	-1.91035	-1.31208	Rps20	ribosomal protein S20
ENSMUSG00000031446	0.74118	-1.9066	2.01063	Cul4a	cullin 4A
ENSMUSG00000074918	-1.13911	-1.90239	0.866802	Inafm2	InaF motif containing 2
ENSMUSG00000069014	-1.27161	-1.90178	-0.510081	Gm5641	predicted gene 5641
ENSMUSG00000030842	0.462667	-1.89537	0.117611	Lamtor1	late endosomal/lysosomal adaptor, MAPK and MTOR activator 1
ENSMUSG00000084156	0.235796	-1.89511	0	No assciated gene
ENSMUSG00000031311	1.37953	-1.88945	-0.884077	Nono	non-POU-domain-containing, octamer binding protein
ENSMUSG00000026701	-0.0817519	-1.88447	0.895895	Prdx6	peroxiredoxin 6
ENSMUSG00000015247	-0.190618	-1.88313	0.779954	Nipsnap3b	nipsnap homolog 3B
ENSMUSG00000000058	0.966898	-1.88302	-1.25147	Cav2	caveolin 2
ENSMUSG00000024158	-0.0723905	-1.88257	-1.01894	Hagh	hydroxyacyl glutathione hydrolase
ENSMUSG00000031179	0.157848	-1.87718	0.136521	Magea9	MAGE family member A9
ENSMUSG00000094518	-0.457955	-1.87357	-0.648927	No assciated gene
ENSMUSG00000026393	0.341857	-1.87285	-0.228667	Nek7	NIMA (never in mitosis gene a)-related expressed kinase 7
ENSMUSG00000000579	-1.59508	-1.87117	0.724331	Dynlt1c	dynein light chain Tctex-type 1C
ENSMUSG00000093661	0	-1.87043	-0.921908	Eif4e3	eukaryotic translation initiation factor 4E member 3
ENSMUSG00000028413	-0.0160115	-1.86625	0.349344	B4galt1	UDP-Gal:betaGlcNAc beta 1,4- galactosyltransferase, polypeptide 1
ENSMUSG00000094242	-0.889431	-1.8657	-0.49934	Gm5456	predicted gene 5456
ENSMUSG00000020163	0.430768	-1.8641	0.485448	Uqcr11	ubiquinol-cytochrome c reductase, complex III subunit XI
ENSMUSG00000030154	0	-1.86363	-0.0576972	Klrb1f	killer cell lectin-like receptor subfamily B member 1F
ENSMUSG00000038949	0.958715	-1.86322	-1.35145	Cnst	consortin, connexin sorting protein
ENSMUSG00000022986	-0.197065	-1.85994	0.304599	Krt75	keratin 75
ENSMUSG00000071647	0.320953	-1.85899	0.514991	Eml3	echinoderm microtubule associated protein like 3
ENSMUSG00000051439	0	-1.85733	0.331656	Cd14	CD14 antigen
ENSMUSG00000003348	1.9871	-1.85069	-1.32299	Mob3a	MOB kinase activator 3A
ENSMUSG00000038664	0.3364	-1.84844	-0.41668	Herc1	HECT and RLD domain containing E3 ubiquitin protein ligase family member 1
ENSMUSG00000097889	2.11691	-1.84809	-1.3898	No assciated gene
ENSMUSG00000021273	0	-1.84662	0.0456658	Fdft1	farnesyl diphosphate farnesyl transferase 1
ENSMUSG00000058446	0.378588	-1.84603	-1.44291	Znrf2	zinc and ring finger 2
ENSMUSG00000055044	-0.247734	-1.84548	1.6094	Pdlim1	PDZ and LIM domain 1 (elfin)
ENSMUSG00000094614	0.618695	-1.83918	-0.617812	No assciated gene
ENSMUSG00000089906	2.28972	-1.83695	-1.15235	Gm6428	predicted pseudogene 6428
ENSMUSG00000097731	0.79038	-1.83683	0.779659	No assciated gene
ENSMUSG00000026112	-0.118597	-1.83537	-1.18458	Coa5	cytochrome C oxidase assembly factor 5
ENSMUSG00000011884	-0.0335107	-1.83267	-1.69777	Gltp	glycolipid transfer protein
ENSMUSG00000025369	-0.392987	-1.8304	-0.173114	Smarcc2	SWI/SNF related, matrix associated, actin dependent regulator of chromatin, subfamily c, member 2
ENSMUSG00000032594	-0.771218	-1.82795	0.178005	Ip6k1	inositol hexaphosphate kinase 1
ENSMUSG00000066037	0.89859	-1.823	-0.321911	Hnrnpr	heterogeneous nuclear ribonucleoprotein R
ENSMUSG00000005125	0.108887	-1.81931	-0.249223	Ndrg1	N-myc downstream regulated gene 1
ENSMUSG00000078517	0.79038	-1.81677	0.789428	Emc1	ER membrane protein complex subunit 1
ENSMUSG00000037251	1.02267	-1.81635	-0.767587	Pomk	protein-O-mannose kinase
ENSMUSG00000024785	-0.241314	-1.81632	-0.34396	Rcl1	RNA terminal phosphate cyclase-like 1
ENSMUSG00000081244	0.0220589	-1.81019	-1.64899	Gm13529	predicted gene 13529
ENSMUSG00000041126	0.19952	-1.80711	0.00701304	H2az2	H2A.Z histone variant 2
ENSMUSG00000029780	-1.15685	-1.80498	-1.43153	Nt5c3	5'-nucleotidase, cytosolic III
ENSMUSG00000034614	-0.0376872	-1.79904	-0.313117	Pik3ip1	phosphoinositide-3-kinase interacting protein 1
ENSMUSG00000020271	0.851851	-1.79716	0.453022	Fbxw11	F-box and WD-40 domain protein 11
ENSMUSG00000033191	0.580781	-1.79383	0.898213	Tie1	tyrosine kinase with immunoglobulin-like and EGF-like domains 1
ENSMUSG00000075700	-1.37787	-1.79339	-0.214163	Selenot	selenoprotein T
ENSMUSG00000060509	1.0303	-1.79329	0.910976	Xcr1	chemokine (C motif) receptor 1
ENSMUSG00000032336	-0.109765	-1.79324	0.175318	Nptn	neuroplastin
ENSMUSG00000031513	0.0969069	-1.79226	0.813091	Leprotl1	leptin receptor overlapping transcript-like 1
ENSMUSG00000028955	0.254592	-1.78948	1.53117	Vamp3	vesicle-associated membrane protein 3
ENSMUSG00000036890	-1.18952	-1.78876	1.51875	Gtdc1	glycosyltransferase-like domain containing 1
ENSMUSG00000015189	-1.14735	-1.78719	-1.11447	Casd1	CAS1 domain containing 1
ENSMUSG00000056004	0.414827	-1.78654	1.08862	Elapor2	endosome-lysosome associated apoptosis and autophagy regulator family member 2
ENSMUSG00000031007	-0.0776352	-1.78549	-0.924346	Atp6ap2	ATPase, H+ transporting, lysosomal accessory protein 2
ENSMUSG00000047905	-0.227348	-1.7844	0.0450884	Gm8566	predicted pseudogene 8566
ENSMUSG00000041571	0.382114	-1.7843	-1.53022	Selenow	selenoprotein W
ENSMUSG00000062081	-1.44538	-1.78189	1.20305	Gm6055	predicted gene 6055
ENSMUSG00000082284	-0.361147	-1.78155	-0.939835	H3f3a-ps1	H3.3 histone A, pseudogene 1
ENSMUSG00000027985	-0.453741	-1.77972	-0.162059	Lef1	lymphoid enhancer binding factor 1
ENSMUSG00000058799	-0.362874	-1.77529	0.170077	Nap1l1	nucleosome assembly protein 1-like 1
ENSMUSG00000037570	0	-1.77525	0.16992	Mcrs1	microspherule protein 1
ENSMUSG00000020015	0.0698234	-1.77337	0.972741	Cdk17	cyclin dependent kinase 17
ENSMUSG00000024793	-0.234176	-1.77068	-1.03267	Tnfrsf25	tumor necrosis factor receptor superfamily, member 25
ENSMUSG00000030298	0.821761	-1.76631	-1.07774	Sec13	SEC13 homolog, nuclear pore and COPII coat complex component
ENSMUSG00000037236	-0.151654	-1.76585	-0.102954	Matr3	matrin 3
ENSMUSG00000092035	1.29918	-1.76447	1.2672	Peg10	paternally expressed 10
ENSMUSG00000002944	-0.841745	-1.758	-1.26061	Cd36	CD36 molecule
ENSMUSG00000031613	0.352525	-1.75479	0.456481	Hpgd	hydroxyprostaglandin dehydrogenase 15 (NAD)
ENSMUSG00000027593	-0.705556	-1.75297	0.278613	Raly	hnRNP-associated with lethal yellow
ENSMUSG00000029826	-1.05542	-1.75145	-0.675964	Zc3hav1	zinc finger CCCH type, antiviral 1
ENSMUSG00000037458	-0.762005	-1.75142	0.0558119	Azin1	antizyme inhibitor 1
ENSMUSG00000056536	0.384007	-1.751	-1.58198	Pign	phosphatidylinositol glycan anchor biosynthesis, class N
ENSMUSG00000020818	0.235796	-1.7498	-0.434863	Mfsd11	major facilitator superfamily domain containing 11
ENSMUSG00000076871	-0.225146	-1.74846	-0.797866	Trdj2	T cell receptor delta joining 2
ENSMUSG00000021917	-0.324341	-1.74814	1.31168	Spcs1	signal peptidase complex subunit 1 homolog (S. cerevisiae)
ENSMUSG00000058050	1.17313	-1.7433	-0.292102	Gm9234	predicted pseudogene 9234
ENSMUSG00000052384	-1.29971	-1.73653	-1.50889	Nrros	negative regulator of reactive oxygen species
ENSMUSG00000081643	0	-1.73205	-1.30616	Gm11605	predicted gene 11605
ENSMUSG00000038608	-0.0375138	-1.73008	-0.392985	Dock10	dedicator of cytokinesis 10
ENSMUSG00000029553	-0.259769	-1.72334	0.778349	Tfec	transcription factor EC
ENSMUSG00000013539	-0.619906	-1.72315	0.497519	Tango2	transport and golgi organization 2
ENSMUSG00000029767	0.217886	-1.72228	0.901401	Calu	calumenin
ENSMUSG00000067274	-1.27407	-1.72076	-1.8325	Rplp0	ribosomal protein, large, P0
ENSMUSG00000075312	-0.679955	-1.71292	0.0471941	Gm13597	predicted gene 13597
ENSMUSG00000005800	-0.361717	-1.71184	-0.267195	Mmp8	matrix metallopeptidase 8
ENSMUSG00000076258	1.48238	-1.71152	-1.14747	No assciated gene
ENSMUSG00000081123	0.307985	-1.71112	0.00796353	No assciated gene
ENSMUSG00000055795	0.374772	-1.70984	-0.614607	Gm5160	predicted gene 5160
ENSMUSG00000032470	1.61014	-1.70659	0.271811	Mras	muscle and microspikes RAS
ENSMUSG00000066491	0.0612261	-1.70097	-0.627006	Cox6c2	cytochrome c oxidase subunit 6C2
ENSMUSG00000027293	0.732869	-1.69097	-0.912189	Ehd4	EH-domain containing 4
ENSMUSG00000027678	-0.19448	-1.688	-0.426139	Ncoa3	nuclear receptor coactivator 3
ENSMUSG00000067833	0	-1.68738	0.036202	No assciated gene
ENSMUSG00000021669	-0.0654605	-1.68428	-0.683791	Cert1	ceramide transporter 1
ENSMUSG00000022452	-0.666335	-1.68423	0.0368762	Smdt1	single-pass membrane protein with aspartate rich tail 1
ENSMUSG00000030742	0.828701	-1.68378	-0.691919	Lat	linker for activation of T cells
ENSMUSG00000096789	0.640036	-1.67915	-0.418363	No assciated gene
ENSMUSG00000088609	1.13707	-1.66993	-0.936953	No assciated gene
ENSMUSG00000098181	1.70677	-1.66787	0.076086	Rps12-ps24	ribosomal protein S12, pseudogene 24
ENSMUSG00000029379	0.587842	-1.66738	-0.351128	Cxcl3	chemokine (C-X-C motif) ligand 3
ENSMUSG00000026490	1.72048	-1.65631	1.30859	Cdc42bpa	CDC42 binding protein kinase alpha
ENSMUSG00000042705	-0.666657	-1.65525	0.0718995	Commd10	COMM domain containing 10
ENSMUSG00000096054	0.869281	-1.6522	-0.149414	Syne1	spectrin repeat containing, nuclear envelope 1
ENSMUSG00000031712	1.61042	-1.64884	-0.965642	Il15	interleukin 15
ENSMUSG00000028343	-0.45576	-1.64801	-1.72135	Erp44	endoplasmic reticulum protein 44
ENSMUSG00000042228	-0.103417	-1.64727	-0.614822	Lyn	LYN proto-oncogene, Src family tyrosine kinase
ENSMUSG00000029313	0.357171	-1.64689	0.209696	Aff1	AF4/FMR2 family, member 1
ENSMUSG00000001751	0	-1.63665	-1.27322	Naglu	alpha-N-acetylglucosaminidase (Sanfilippo disease IIIB)
ENSMUSG00000034297	-0.0596013	-1.63134	-1.2385	Med13	mediator complex subunit 13
ENSMUSG00000079003	0.665661	-1.62651	1.31568	Samd1	sterile alpha motif domain containing 1
ENSMUSG00000059005	-1.27781	-1.62562	0.134639	Hnrnpa3	heterogeneous nuclear ribonucleoprotein A3
ENSMUSG00000064342	-1.60415	-1.62431	-0.215523	mt-Ti	mitochondrially encoded tRNA isoleucine
ENSMUSG00000025358	-0.234176	-1.62278	-0.13896	Cdk2	cyclin dependent kinase 2
ENSMUSG00000029552	-0.321732	-1.62209	-0.707272	Tes	testin LIM domain protein
ENSMUSG00000053279	0.0344316	-1.62204	1.20184	Aldh1a1	aldehyde dehydrogenase family 1, subfamily A1
ENSMUSG00000076281	1.10023	-1.61501	-0.802152	No assciated gene
ENSMUSG00000079658	-0.482457	-1.61223	-0.205766	Eloc	elongin C
ENSMUSG00000031823	-0.69883	-1.61204	0.146802	Zdhhc7	zinc finger, DHHC domain containing 7
ENSMUSG00000096726	0.411556	-1.61057	-0.300952	Gm5558	predicted gene 5558
ENSMUSG00000057554	0	-1.60083	-0.417791	Lgals8	lectin, galactose binding, soluble 8
ENSMUSG00000073676	0.335985	-1.59879	-1.14231	Hspe1	heat shock protein 1 (chaperonin 10)
ENSMUSG00000042524	0.545258	-1.59818	-0.187003	Sun2	Sad1 and UNC84 domain containing 2
ENSMUSG00000086877	0	-1.597	0.361912	A230072C01Rik	RIKEN cDNA A230072C01 gene
ENSMUSG00000003992	0	-1.59573	-0.640465	Ssbp2	single-stranded DNA binding protein 2
ENSMUSG00000032652	-0.380091	-1.59457	-0.575065	Crebl2	cAMP responsive element binding protein-like 2
ENSMUSG00000029462	-0.938577	-1.59336	-1.01408	Vps29	VPS29 retromer complex component
ENSMUSG00000081660	0.524461	-1.59116	-0.98232	Gm11787	predicted gene 11787
ENSMUSG00000064220	-1.04028	-1.59071	1.53876	H2ac18	H2A clustered histone 18
ENSMUSG00000084168	-1.48988	-1.58913	0.270535	Atp5l2-ps	ATP synthase, H+ transporting, mitochondrial FO complex, subunit G2, pseudogene
ENSMUSG00000038235	0.168716	-1.58628	0.556236	F11r	F11 receptor
ENSMUSG00000025860	0.782783	-1.58565	-1.74789	Xiap	X-linked inhibitor of apoptosis
ENSMUSG00000028124	0.269068	-1.58529	0.653309	Gclm	glutamate-cysteine ligase, modifier subunit
ENSMUSG00000038876	0.953067	-1.5845	-1.88683	Rnf146	ring finger protein 146
ENSMUSG00000024851	0.42666	-1.5825	0.221305	Pitpnm1	phosphatidylinositol transfer protein, membrane-associated 1
ENSMUSG00000020023	0.791825	-1.57966	1.13992	Tmcc3	transmembrane and coiled coil domains 3
ENSMUSG00000036256	-0.234176	-1.5766	-0.0906075	Igfbp7	insulin-like growth factor binding protein 7
ENSMUSG00000089656	0.890755	-1.57623	0.464792	Gm16271	predicted gene 16271
ENSMUSG00000021012	0.361458	-1.57227	1.0651	Zc3h14	zinc finger CCCH type containing 14
ENSMUSG00000022377	-0.708886	-1.57174	0.781152	Asap1	ArfGAP with SH3 domain, ankyrin repeat and PH domain1
ENSMUSG00000070476	1.29584	-1.56933	-0.245844	Fam217b	family with sequence similarity 217, member B
ENSMUSG00000031628	0.0630409	-1.56626	0.257853	Casp3	caspase 3
ENSMUSG00000079037	1.21856	-1.56353	0.728438	Prnp	prion protein
ENSMUSG00000001440	0.0398732	-1.56196	-0.883291	Kpnb1	karyopherin (importin) beta 1
ENSMUSG00000042197	1.4583	-1.56144	1.53078	Zfp451	zinc finger protein 451
ENSMUSG00000038069	1.70323	-1.56141	-0.273472	Cdkn2aip	CDKN2A interacting protein
ENSMUSG00000089855	0.245911	-1.5604	-0.495671	No assciated gene
ENSMUSG00000018425	0.735941	-1.56003	0.102338	Dhx40	DEAH (Asp-Glu-Ala-His) box polypeptide 40
ENSMUSG00000000320	-1.34534	-1.55269	-0.194194	Alox12	arachidonate 12-lipoxygenase
ENSMUSG00000021411	1.35728	-1.55179	0.591488	Pxdc1	PX domain containing 1
ENSMUSG00000053768	1.03573	-1.55127	-1.43995	Chchd3	coiled-coil-helix-coiled-coil-helix domain containing 3
ENSMUSG00000062808	0.637644	-1.54988	-1.16868	No assciated gene
ENSMUSG00000084368	-0.590927	-1.54597	-0.145381	Gm11572	predicted gene 11572
ENSMUSG00000030465	-0.0159026	-1.54317	-0.706182	Psd3	pleckstrin and Sec7 domain containing 3
ENSMUSG00000020752	0	-1.53995	-1.25881	Recql5	RecQ protein-like 5
ENSMUSG00000022812	1.6421	-1.53694	0.560771	Gsk3b	glycogen synthase kinase 3 beta
ENSMUSG00000089718	0.0931964	-1.53627	0.545125	2310075C17Rik	RIKEN cDNA 2310075C17 gene
ENSMUSG00000071379	1.44363	-1.53389	0.355648	Hpcal1	hippocalcin-like 1
ENSMUSG00000049493	-0.0229482	-1.53383	-0.110191	Pls1	plastin 1 (I-isoform)
ENSMUSG00000028383	-0.564481	-1.5223	0.275005	Hsdl2	hydroxysteroid dehydrogenase like 2
ENSMUSG00000060073	0.467497	-1.52154	0.22122	Psma3	proteasome subunit alpha 3
ENSMUSG00000094338	-1.19975	-1.52091	1.42475	H2bc13	H2B clustered histone 13
ENSMUSG00000047040	0.387292	-1.52052	-0.750095	Prr15l	proline rich 15-like
ENSMUSG00000074269	-0.224703	-1.51947	0.0423276	Rec114	REC114 meiotic recombination protein
ENSMUSG00000042642	0.120403	-1.51886	-0.518927	Flad1	flavin adenine dinucleotide synthetase 1
ENSMUSG00000037434	0.579741	-1.51863	0.178122	Slc30a1	solute carrier family 30 (zinc transporter), member 1
ENSMUSG00000071042	-1.37265	-1.51857	0.610988	Rasgrp3	RAS, guanyl releasing protein 3
ENSMUSG00000091905	-0.479159	-1.51486	-0.172069	Dnajb6-ps	DnaJ heat shock protein family (Hsp40) member B6, pseudogene
ENSMUSG00000018377	1.80196	-1.51431	-0.495349	Vezf1	vascular endothelial zinc finger 1
ENSMUSG00000028536	-0.338128	-1.51306	0.212918	2610528J11Rik	RIKEN cDNA 2610528J11 gene
ENSMUSG00000038301	0.656062	-1.51281	1.54857	Snx10	sorting nexin 10
ENSMUSG00000031176	0.700166	-1.5127	-0.534967	Dynlt3	dynein light chain Tctex-type 3
ENSMUSG00000022999	0.390258	-1.51228	1.14782	Lmbr1l	limb region 1 like
ENSMUSG00000083780	0.623384	-1.51177	0.0468314	Gm12728	predicted gene 12728
ENSMUSG00000041164	0.168716	-1.50794	0.175987	Zmiz2	zinc finger, MIZ-type containing 2
ENSMUSG00000033713	0.139335	-1.50735	-0.468422	Foxn3	forkhead box N3
ENSMUSG00000027835	1.23563	-1.50404	0.0539851	Pdcd10	programmed cell death 10
ENSMUSG00000016481	0.991227	-1.50349	-0.328743	Cr1l	complement component (3b/4b) receptor 1-like
ENSMUSG00000090523	0.178793	-1.50304	-0.22739	Gypc	glycophorin C
ENSMUSG00000039231	0.851878	-1.5028	-0.607189	Suv39h1	suppressor of variegation 3-9 1
ENSMUSG00000020827	0.0143581	-1.49896	-0.278098	Mink1	misshapen-like kinase 1 (zebrafish)
ENSMUSG00000086316	-0.445145	-1.49634	-0.082474	Nbdy	negative regulator of P-body association
ENSMUSG00000019494	0.498842	-1.49563	0.39766	Cops6	COP9 signalosome subunit 6
ENSMUSG00000022960	0.777895	-1.49379	-0.939173	Donson	downstream neighbor of SON
ENSMUSG00000057278	0.128284	-1.49187	1.50176	Snrpg	small nuclear ribonucleoprotein polypeptide G
ENSMUSG00000075288	1.36383	-1.48919	-0.373091	Gm6913	predicted gene 6913
ENSMUSG00000091613	-0.611876	-1.48899	-0.165926	Gm17046	predicted gene 17046
ENSMUSG00000027935	0	-1.48857	0.194998	Rab13	RAB13, member RAS oncogene family
ENSMUSG00000042198	0.140478	-1.48693	0.0409905	Chchd7	coiled-coil-helix-coiled-coil-helix domain containing 7
ENSMUSG00000092074	-1.42026	-1.48418	0.363216	Dynlt1a	dynein light chain Tctex-type 1A
ENSMUSG00000082481	1.42873	-1.48339	0.735334	Rps12-ps19	ribosomal protein S12, pseudogene 19
ENSMUSG00000077450	-0.863938	-1.48184	0.404923	Rab11b	RAB11B, member RAS oncogene family
ENSMUSG00000039852	-0.687856	-1.48174	-0.166205	Rere	arginine glutamic acid dipeptide (RE) repeats
ENSMUSG00000050856	0.335985	-1.48169	1.2889	Atp5k	ATP synthase, H+ transporting, mitochondrial F1F0 complex, subunit E
ENSMUSG00000060441	0.266889	-1.48131	-0.528044	Trim5	tripartite motif-containing 5
ENSMUSG00000072501	-1.02625	-1.47837	0.266169	Phf20l1	PHD finger protein 20-like 1
ENSMUSG00000089197	-0.361717	-1.4731	0.576382	Gm25767	predicted gene, 25767
ENSMUSG00000020641	0.492048	-1.46831	1.26355	Rsad2	radical S-adenosyl methionine domain containing 2
ENSMUSG00000076928	0.149545	-1.4668	-0.377012	Trac	T cell receptor alpha constant
ENSMUSG00000007458	-1.31613	-1.46489	1.19649	M6pr	mannose-6-phosphate receptor, cation dependent
ENSMUSG00000002603	0.876435	-1.46298	-0.625734	Tgfb1	transforming growth factor, beta 1
ENSMUSG00000058240	0.311255	-1.46276	-0.657725	Cryzl1	crystallin, zeta (quinone reductase)-like 1
ENSMUSG00000090381	0.382114	-1.46126	0.297125	Gm6158	predicted gene 6158
ENSMUSG00000031214	0.150508	-1.46116	0.539963	Ophn1	oligophrenin 1
ENSMUSG00000032285	-1.00609	-1.45895	-1.56091	Dnaja4	DnaJ heat shock protein family (Hsp40) member A4
ENSMUSG00000076498	0.0742191	-1.45597	-1.11787	Trbc2	T cell receptor beta, constant 2
ENSMUSG00000047648	0.390258	-1.45344	-0.0327942	Fbxo30	F-box protein 30
ENSMUSG00000021997	0	-1.45342	0.290175	Lrrc63	leucine rich repeat containing 63
ENSMUSG00000037523	0.167606	-1.4531	-0.133908	Mavs	mitochondrial antiviral signaling protein
ENSMUSG00000026753	0.0363524	-1.44943	-0.972291	Ppp6c	protein phosphatase 6, catalytic subunit
ENSMUSG00000081473	-0.593983	-1.44473	0.473002	Gm4853	predicted pseudogene 4853
ENSMUSG00000026489	1.38318	-1.44412	0.987271	Coq8a	coenzyme Q8A
ENSMUSG00000031447	0.604157	-1.44397	0.337687	Lamp1	lysosomal-associated membrane protein 1
ENSMUSG00000024206	-0.680366	-1.44266	0.28652	Rfx2	regulatory factor X, 2 (influences HLA class II expression)
ENSMUSG00000022814	0	-1.4405	-0.983286	Umps	uridine monophosphate synthetase
ENSMUSG00000024429	0	-1.43965	-0.392603	Gnl1	guanine nucleotide binding protein-like 1
ENSMUSG00000040859	0.311987	-1.43866	-0.759691	Bsdc1	BSD domain containing 1
ENSMUSG00000083012	1.53462	-1.43783	-0.842422	Fam220a	family with sequence similarity 220, member A
ENSMUSG00000082321	0.00319597	-1.43742	-0.189097	Gm14253	predicted gene 14253
ENSMUSG00000060923	0	-1.43315	0.452669	Acyp2	acylphosphatase 2, muscle type
ENSMUSG00000097763	0	-1.43033	1.206	Gm26636	predicted gene, 26636
ENSMUSG00000035640	1.20701	-1.42888	-0.797388	Cbarp	calcium channel, voltage-dependent, beta subunit associated regulatory protein
ENSMUSG00000091193	0	-1.4283	-0.675321	Gm17333	predicted gene, 17333
ENSMUSG00000030217	0.74118	-1.42689	0.445475	Art4	ADP-ribosyltransferase 4
ENSMUSG00000040592	0.74118	-1.42462	-0.426162	Cd79b	CD79B antigen
ENSMUSG00000058622	1.37852	-1.42451	-0.304767	Gm5265	predicted pseudogene 5265
ENSMUSG00000032507	-1.04808	-1.42416	-0.451686	Fbxl2	F-box and leucine-rich repeat protein 2
ENSMUSG00000037966	-0.714742	-1.42155	0.548428	Ninj1	ninjurin 1
ENSMUSG00000028676	0	-1.41884	-1.03186	Srsf10	serine and arginine-rich splicing factor 10
ENSMUSG00000022265	1.24359	-1.4188	-1.74425	Ank	progressive ankylosis
ENSMUSG00000054893	-0.195922	-1.41817	-0.990641	Zfp667	zinc finger protein 667
ENSMUSG00000045775	0.620509	-1.41658	0.272937	Slc16a5	solute carrier family 16 (monocarboxylic acid transporters), member 5
ENSMUSG00000026414	0.406951	-1.41485	-0.550125	Tnnt2	troponin T2, cardiac
ENSMUSG00000003382	-0.195922	-1.41393	-0.32384	Etv3	ets variant 3
ENSMUSG00000058498	1.02557	-1.4128	1.0647	Rnf207	ring finger protein 207
ENSMUSG00000080823	-0.288507	-1.4112	0.0244607	Atp5l-ps2	ATP synthase, H+ transporting, mitochondrial F0 complex, subunit G, pseudogene 2
ENSMUSG00000036093	1.46579	-1.40725	-0.775193	Arl5a	ADP-ribosylation factor-like 5A
ENSMUSG00000020175	-0.0272068	-1.40631	1.42283	Rab36	RAB36, member RAS oncogene family
ENSMUSG00000037134	0.270525	-1.3955	-1.11412	Prmt9	protein arginine methyltransferase 9
ENSMUSG00000087153	1.22813	-1.39545	-1.27106	Gm6483	predicted gene 6483
ENSMUSG00000073008	-0.197065	-1.39521	0.165359	Gpr174	G protein-coupled receptor 174
ENSMUSG00000049246	0	-1.39438	-0.342952	Hspe1-ps2	heat shock protein 1 (chaperonin 10), pseudogene 2
ENSMUSG00000087367	0.168716	-1.39316	-0.413005	Gm15491	predicted gene 15491
ENSMUSG00000035171	0	-1.39311	-1.5094	1110059E24Rik	RIKEN cDNA 1110059E24 gene
ENSMUSG00000058704	-0.623824	-1.38599	-1.18334	Memo1	mediator of cell motility 1
ENSMUSG00000025439	0	-1.38551	0.0962187	Clns1a	chloride channel, nucleotide-sensitive, 1A
ENSMUSG00000040158	-1.04669	-1.38094	0.0652911	Tax1bp3	Tax1 (human T cell leukemia virus type I) binding protein 3
ENSMUSG00000088246	1.00573	-1.38045	-1.16385	No assciated gene
ENSMUSG00000029686	1.77584	-1.37954	-0.651871	Cul1	cullin 1
ENSMUSG00000031557	0.833489	-1.37909	-1.2476	Plekha2	pleckstrin homology domain-containing, family A (phosphoinositide binding specific) member 2
ENSMUSG00000095512	-0.935892	-1.3771	-0.56473	Gm17222	predicted gene 17222
ENSMUSG00000018965	1.01195	-1.36985	-0.397496	Ywhah	tyrosine 3-monooxygenase/tryptophan 5-monooxygenase activation protein, eta polypeptide
ENSMUSG00000043483	0.0641836	-1.36903	-0.641037	Gm6863	predicted gene 6863
ENSMUSG00000022089	0.266235	-1.36569	-0.704415	Bin3	bridging integrator 3
ENSMUSG00000061559	-1.35117	-1.36523	-0.665679	Skic8	SKI8 subunit of superkiller complex
ENSMUSG00000025058	-0.197065	-1.36511	-0.361543	Tasl	TLR adaptor interacting with endolysosomal SLC15A4
ENSMUSG00000049832	0.141713	-1.36403	0.670816	Rbx1-ps	ring-box 1, pseudogene
ENSMUSG00000005763	1.62159	-1.36334	0.0338109	Cd247	CD247 antigen
ENSMUSG00000028907	0	-1.36327	-0.535453	Utp11	UTP11 small subunit processome component
ENSMUSG00000068629	0.300523	-1.36312	-1.63426	Gm6155	predicted pseudogene 6155
ENSMUSG00000087174	1.33766	-1.36273	0.929499	5530601H04Rik	RIKEN cDNA 5530601H04 gene
ENSMUSG00000049124	0.346051	-1.35949	0.451277	Gm8186	predicted gene 8186
ENSMUSG00000023921	0.352525	-1.35941	-0.141897	Mmut	methylmalonyl-Coenzyme A mutase
ENSMUSG00000047804	-0.280851	-1.35842	-0.463031	Akap10	A kinase (PRKA) anchor protein 10
ENSMUSG00000027708	0.555915	-1.35702	-0.955513	Dcun1d1	DCN1, defective in cullin neddylation 1, domain containing 1 (S. cerevisiae)
ENSMUSG00000035342	0.283258	-1.35539	-0.980008	Lzts2	leucine zipper, putative tumor suppressor 2
ENSMUSG00000005981	0	-1.35527	0.348791	Trap1	TNF receptor-associated protein 1
ENSMUSG00000078850	0	-1.35486	-0.169992	Gm2348	predicted pseudogene 2348
ENSMUSG00000026781	-0.552787	-1.35358	-0.647469	Acbd5	acyl-Coenzyme A binding domain containing 5
ENSMUSG00000033379	-0.115917	-1.35345	-0.0181637	Atp6v0b	ATPase, H+ transporting, lysosomal V0 subunit B
ENSMUSG00000028245	0.758908	-1.35105	-0.521186	Nsmaf	neutral sphingomyelinase (N-SMase) activation associated factor
ENSMUSG00000032330	-1.20216	-1.35032	1.07571	Cox7a2	cytochrome c oxidase subunit 7A2
ENSMUSG00000063849	0.511903	-1.34874	0.126165	Ppcdc	phosphopantothenoylcysteine decarboxylase
ENSMUSG00000045519	0.857956	-1.34569	-1.24496	Zfp560	zinc finger protein 560
ENSMUSG00000009551	1.1442	-1.34529	0.00705816	6330409D20Rik	RIKEN cDNA 6330409D20 gene
ENSMUSG00000038765	0.168716	-1.34426	0	Lmx1b	LIM homeobox transcription factor 1 beta
ENSMUSG00000044792	1.71313	-1.33945	-0.597563	Isca1	iron-sulfur cluster assembly 1
ENSMUSG00000030057	-0.340572	-1.33741	-0.984221	Cnbp	cellular nucleic acid binding protein
ENSMUSG00000031627	0.608097	-1.33567	-0.577888	Irf2	interferon regulatory factor 2
ENSMUSG00000002257	0	-1.33429	0.330418	Def6	differentially expressed in FDCP 6
ENSMUSG00000080932	1.25002	-1.33351	-0.541065	Gm10224	predicted pseudogene 10224
ENSMUSG00000029840	-0.162268	-1.3329	1.05416	Mtpn	myotrophin
ENSMUSG00000040557	0	-1.33285	0.0592565	Mettl27	methyltransferase like 27
ENSMUSG00000035849	0	-1.33165	0.365059	Krt222	keratin 222
ENSMUSG00000026357	0.915233	-1.32848	-0.0894892	Rgs18	regulator of G-protein signaling 18
ENSMUSG00000037754	0.285814	-1.32826	0.819446	Ppp1r16b	protein phosphatase 1, regulatory subunit 16B
ENSMUSG00000021428	0.168716	-1.32668	1.35766	Riok1	RIO kinase 1
ENSMUSG00000045932	-0.0981497	-1.32556	-0.66314	Ifit2	interferon-induced protein with tetratricopeptide repeats 2
ENSMUSG00000028381	0.192032	-1.32388	0.0907463	Ugcg	UDP-glucose ceramide glucosyltransferase
ENSMUSG00000022946	0.799345	-1.32148	0.00196427	Dop1b	DOP1 leucine zipper like protein B
ENSMUSG00000034292	-0.197065	-1.3212	0.905896	Traf3ip1	TRAF3 interacting protein 1
ENSMUSG00000027601	1.16355	-1.31811	0.226599	Mtfr1	mitochondrial fission regulator 1
ENSMUSG00000041477	0.286258	-1.31691	0.406593	Dcp1b	decapping mRNA 1B
ENSMUSG00000039361	0.890624	-1.31689	0.599736	Picalm	phosphatidylinositol binding clathrin assembly protein
ENSMUSG00000085023	1.29402	-1.31393	0.804987	Gm12744	predicted gene 12744
ENSMUSG00000026626	1.04415	-1.31196	-0.74724	Ppp2r5a	protein phosphatase 2, regulatory subunit B', alpha
ENSMUSG00000021038	0.237167	-1.30689	0.508843	Vipas39	VPS33B interacting protein, apical-basolateral polarity regulator, spe-39 homolog
ENSMUSG00000035824	1.40188	-1.30447	0.56863	Tk2	thymidine kinase 2, mitochondrial
ENSMUSG00000040584	0	-1.30312	-0.577932	Abcb1a	ATP-binding cassette, sub-family B (MDR/TAP), member 1A
ENSMUSG00000041762	0	-1.30278	-0.177307	Gpr155	G protein-coupled receptor 155
ENSMUSG00000080966	1.05228	-1.30239	0.0286467	Gm6263	predicted gene 6263
ENSMUSG00000074030	0.120403	-1.30175	0.0912053	Exoc8	exocyst complex component 8
ENSMUSG00000033400	0.235796	-1.30118	1.20596	Agl	amylo-1,6-glucosidase, 4-alpha-glucanotransferase
ENSMUSG00000021298	0.544115	-1.29663	-1.62639	Gpr132	G protein-coupled receptor 132
ENSMUSG00000068200	0	-1.29625	0.300832	Gm5931	predicted pseudogene 5931
ENSMUSG00000026579	1.11305	-1.29294	0.516868	F5	coagulation factor V
ENSMUSG00000054435	0.168716	-1.28943	-0.596582	Gimap4	GTPase, IMAP family member 4
ENSMUSG00000034868	0.0956764	-1.28758	0.181103	Myl12b	myosin, light chain 12B, regulatory
ENSMUSG00000001270	-0.1389	-1.28493	0.175458	Ckb	creatine kinase, brain
ENSMUSG00000083270	0	-1.28309	-0.135112	Gm13498	predicted gene 13498
ENSMUSG00000022564	-0.0947365	-1.27867	-0.0966759	Grina	glutamate receptor, ionotropic, N-methyl D-aspartate-associated protein 1 (glutamate binding)
ENSMUSG00000035765	-0.631029	-1.27766	0.0109155	Dym	dymeclin
ENSMUSG00000005980	0	-1.27732	0.210913	Dnase1	deoxyribonuclease I
ENSMUSG00000033808	0.619747	-1.27692	0.0405526	Tmem87a	transmembrane protein 87A
ENSMUSG00000010097	0.74118	-1.27668	-0.939258	Nxf1	nuclear RNA export factor 1
ENSMUSG00000033396	0.120403	-1.27594	-0.120934	Spg11	SPG11, spatacsin vesicle trafficking associated
ENSMUSG00000038515	-0.571893	-1.27591	-0.584046	Grtp1	GH regulated TBC protein 1
ENSMUSG00000014313	-0.775256	-1.27407	0.150933	Cox6c	cytochrome c oxidase subunit 6C
ENSMUSG00000002699	1.52984	-1.27361	-0.00886274	Lcp2	lymphocyte cytosolic protein 2
ENSMUSG00000070610	0	-1.27353	0.0398592	Gm13127	predicted gene 13127
ENSMUSG00000036438	-0.487544	-1.27321	-0.435806	Calm2	calmodulin 2
ENSMUSG00000021147	-1.29103	-1.27312	-0.684893	Wdr37	WD repeat domain 37
ENSMUSG00000025066	-0.195922	-1.27251	0.357718	Sfr1	SWI5 dependent recombination repair 1
ENSMUSG00000001962	0.504449	-1.26622	-0.570415	Fam50a	family with sequence similarity 50, member A
ENSMUSG00000081565	1.31169	-1.26592	0.382846	Rps12-ps5	ribosomal protein S12, pseudogene 5
ENSMUSG00000027381	0.462667	-1.26395	-0.632095	Bcl2l11	BCL2-like 11 (apoptosis facilitator)
ENSMUSG00000026860	0.120403	-1.26385	0.0658413	Sh3glb2	SH3-domain GRB2-like endophilin B2
ENSMUSG00000019883	0.872468	-1.26275	-1.53745	Echdc1	enoyl Coenzyme A hydratase domain containing 1
ENSMUSG00000001569	0	-1.26275	0.0881509	Nom1	nucleolar protein with MIF4G domain 1
ENSMUSG00000097978	-1.01579	-1.2599	0.860336	No assciated gene
ENSMUSG00000037470	-0.562016	-1.25848	0.545118	Uggt1	UDP-glucose glycoprotein glucosyltransferase 1
ENSMUSG00000092344	0.335985	-1.25457	-0.285525	Hspe1-ps3	heat shock protein 1 (chaperonin 10), pseudogene 3
ENSMUSG00000015755	1.32611	-1.25427	-0.367787	Tab2	TGF-beta activated kinase 1/MAP3K7 binding protein 2
ENSMUSG00000026192	0.100761	-1.25394	-0.949668	Atic	5-aminoimidazole-4-carboxamide ribonucleotide formyltransferase/IMP cyclohydrolase
ENSMUSG00000000049	0	-1.25302	0.140501	Apoh	apolipoprotein H
ENSMUSG00000035048	0	-1.24871	0.638322	Anapc13	anaphase promoting complex subunit 13
ENSMUSG00000026276	-1.12166	-1.24777	-0.74764	Septin2	septin 2
ENSMUSG00000021598	0.120403	-1.23934	-0.377219	Med10	mediator complex subunit 10
ENSMUSG00000032571	-0.197065	-1.23771	-0.635342	Pik3r4	phosphoinositide-3-kinase regulatory subunit 4
ENSMUSG00000002580	0.585082	-1.23697	1.2164	Mien1	migration and invasion enhancer 1
ENSMUSG00000063314	-0.132251	-1.23548	-0.857126	Gm12657	predicted gene 12657
ENSMUSG00000033004	0.451372	-1.23527	0.139909	Mycbp2	MYC binding protein 2, E3 ubiquitin protein ligase
ENSMUSG00000038683	0.244258	-1.23226	-0.485978	Pak1ip1	PAK1 interacting protein 1
ENSMUSG00000033931	0.457894	-1.22945	0.918403	Rbm34	RNA binding motif protein 34
ENSMUSG00000054426	-0.288776	-1.22845	1.03663	A930005H10Rik	RIKEN cDNA A930005H10 gene
ENSMUSG00000071359	0.66055	-1.22798	1.29304	Tbpl1	TATA box binding protein-like 1
ENSMUSG00000037514	0	-1.22767	-0.762303	Pank2	pantothenate kinase 2
ENSMUSG00000001542	1.16088	-1.22425	0.0527862	Ell2	elongation factor for RNA polymerase II 2
ENSMUSG00000049516	0.230812	-1.22371	-1.22474	Spty2d1	SPT2 chromatin protein domain containing 1
ENSMUSG00000039842	-0.68708	-1.22271	0.852041	Mcph1	microcephaly, primary autosomal recessive 1
ENSMUSG00000039983	-0.944439	-1.22197	-0.182373	Ccdc32	coiled-coil domain containing 32
ENSMUSG00000018168	0.987331	-1.22094	0.506014	Ikzf3	IKAROS family zinc finger 3
ENSMUSG00000081552	-0.595379	-1.2199	-0.696004	Gm12328	predicted gene 12328
ENSMUSG00000051682	0.235796	-1.2195	0.39593	Treml4	triggering receptor expressed on myeloid cells-like 4
ENSMUSG00000061751	0.289119	-1.21646	0.78221	Kalrn	kalirin, RhoGEF kinase
ENSMUSG00000031165	1.0073	-1.21573	-1.52709	Was	Wiskott-Aldrich syndrome
ENSMUSG00000041515	0	-1.21523	0.165149	Irf8	interferon regulatory factor 8
ENSMUSG00000031078	-0.106313	-1.21491	-0.797736	Cttn	cortactin
ENSMUSG00000027968	0.168716	-1.21031	-0.096557	Larp7	La ribonucleoprotein 7, transcriptional regulator
ENSMUSG00000039480	-0.92311	-1.20922	0.889072	Nt5dc1	5'-nucleotidase domain containing 1
ENSMUSG00000041859	0.531951	-1.20914	0.00737726	Mcm3	minichromosome maintenance complex component 3
ENSMUSG00000027884	0	-1.20812	-0.206472	Clcc1	chloride channel CLIC-like 1
ENSMUSG00000032698	-0.0820921	-1.20716	-0.309717	Lmo2	LIM domain only 2
ENSMUSG00000082029	-0.161309	-1.20666	-0.445465	H3f3c	H3 histone, family 3C
ENSMUSG00000017802	0	-1.20542	1.06408	Retreg3	reticulophagy regulator family member 3
ENSMUSG00000010110	-0.0283494	-1.20051	0.363499	Stx5a	syntaxin 5A
ENSMUSG00000029632	1.49392	-1.20031	0.969848	Ndufa4	Ndufa4, mitochondrial complex associated
ENSMUSG00000085972	-0.355652	-1.1994	0.353861	1110028F11Rik	RIKEN cDNA 1110028F11 gene
ENSMUSG00000075576	0	-1.19839	0.617302	Gm12359	predicted gene 12359
ENSMUSG00000014453	0.74118	-1.19795	0.326501	Blk	B lymphoid kinase
ENSMUSG00000092428	0.14419	-1.19791	-1.02257	Gm20545	predicted gene 20545
ENSMUSG00000062116	0	-1.19779	0.444297	Zfp954	zinc finger protein 954
ENSMUSG00000079139	-0.157192	-1.19771	-1.02632	Gm4204	predicted gene 4204
ENSMUSG00000087270	-0.878805	-1.19563	0.731358	Gm12983	predicted gene 12983
ENSMUSG00000051675	0	-1.18736	-0.127467	Trim32	tripartite motif-containing 32
ENSMUSG00000095343	0.634665	-1.18539	-1.38317	No assciated gene
ENSMUSG00000017466	0.610109	-1.18424	0.1059	Timp2	tissue inhibitor of metalloproteinase 2
ENSMUSG00000084404	0.358513	-1.18281	-1.35714	Gm12513	predicted gene 12513
ENSMUSG00000027078	1.3787	-1.18253	-0.489787	Ube2l6	ubiquitin-conjugating enzyme E2L 6
ENSMUSG00000020859	0.275472	-1.18252	-0.421118	Spag9	sperm associated antigen 9
ENSMUSG00000036356	0.88555	-1.18184	-0.988679	Csgalnact1	chondroitin sulfate N-acetylgalactosaminyltransferase 1
ENSMUSG00000085720	0	-1.17955	0	Gm7854	predicted gene 7854
ENSMUSG00000029131	-0.420104	-1.17888	-0.0408803	Dnajb6	DnaJ heat shock protein family (Hsp40) member B6
ENSMUSG00000038745	-0.0591861	-1.174	-0.515407	Nlrp6	NLR family, pyrin domain containing 6
ENSMUSG00000038175	0	-1.16847	0.991039	Mylip	myosin regulatory light chain interacting protein
ENSMUSG00000022463	0	-1.16819	-0.194714	Srebf2	sterol regulatory element binding factor 2
ENSMUSG00000067869	0	-1.16626	-0.702991	Tcea1-ps1	transcription elongation factor A (SII) 1, pseudogene 1
ENSMUSG00000024290	0.476701	-1.16516	-0.350628	Rock1	Rho-associated coiled-coil containing protein kinase 1
ENSMUSG00000031902	0.0355579	-1.16405	-0.197285	Nfatc3	nuclear factor of activated T cells, cytoplasmic, calcineurin dependent 3
ENSMUSG00000081350	-0.486357	-1.16327	-0.457257	Gm5388	predicted gene 5388
ENSMUSG00000000827	-0.448634	-1.1631	-0.850887	Tpd52l2	tumor protein D52-like 2
ENSMUSG00000020305	0.489669	-1.16046	-1.16282	Asb3	ankyrin repeat and SOCS box-containing 3
ENSMUSG00000094737	-0.556846	-1.16032	-1.23566	Gm17045	predicted gene 17045
ENSMUSG00000022696	0.873197	-1.15841	0.377984	Sidt1	SID1 transmembrane family, member 1
ENSMUSG00000032602	1.01522	-1.15771	0.614203	Slc25a20	solute carrier family 25 (mitochondrial carnitine/acylcarnitine translocase), member 20
ENSMUSG00000035683	0.168716	-1.15748	0.561133	Melk	maternal embryonic leucine zipper kinase
ENSMUSG00000002963	0	-1.15524	0.130234	Pnkp	polynucleotide kinase 3'- phosphatase
ENSMUSG00000026698	1.14658	-1.15002	0.244001	Pigc	phosphatidylinositol glycan anchor biosynthesis, class C
ENSMUSG00000034701	0	-1.14904	-0.123638	Neurod1	neurogenic differentiation 1
ENSMUSG00000081081	0	-1.14814	-1.02074	Gm14856	predicted gene 14856
ENSMUSG00000095124	-0.644224	-1.14558	0.378939	No assciated gene
ENSMUSG00000014867	-0.240487	-1.143	-0.982103	Surf4	surfeit gene 4
ENSMUSG00000022890	1.04251	-1.14085	-0.407992	Atp5j	ATP synthase, H+ transporting, mitochondrial F0 complex, subunit F
ENSMUSG00000085861	0	-1.13772	0.136521	Armh2	armadillo-like helical domain containing 2
ENSMUSG00000024999	0.390258	-1.13612	-0.133272	Noc3l	NOC3 like DNA replication regulator
ENSMUSG00000033102	0.531951	-1.13569	-0.225419	Cdc14b	CDC14 cell division cycle 14B
ENSMUSG00000022415	0	-1.13449	0.136521	Syngr1	synaptogyrin 1
ENSMUSG00000025035	0.976976	-1.13442	-0.375756	Arl3	ADP-ribosylation factor-like 3
ENSMUSG00000027274	-0.376618	-1.13387	-0.583333	Mkks	McKusick-Kaufman syndrome
ENSMUSG00000097142	0.168716	-1.13041	-0.260733	No assciated gene
ENSMUSG00000083922	-0.713283	-1.1293	0.913192	Gm3835	predicted pseudogene 3835
ENSMUSG00000044080	-0.18684	-1.1281	0.571637	S100a1	S100 calcium binding protein A1
ENSMUSG00000042446	0.281039	-1.12788	1.11165	Zmym4	zinc finger, MYM-type 4
ENSMUSG00000054766	0.726749	-1.12756	-0.48092	Set	SET nuclear oncogene
ENSMUSG00000028032	1.32087	-1.12705	-0.219897	Papss1	3'-phosphoadenosine 5'-phosphosulfate synthase 1
ENSMUSG00000082988	0	-1.12625	0.0853892	Gm5903	predicted gene 5903
ENSMUSG00000025757	-0.137495	-1.12478	-0.189432	Hspa4l	heat shock protein 4 like
ENSMUSG00000096699	0	-1.1226	-0.235527	Rps19-ps4	ribosomal protein S19, pseudogene 4
ENSMUSG00000022008	-0.197065	-1.12116	-0.609129	Gpalpp1	GPALPP motifs containing 1
ENSMUSG00000028409	0.232619	-1.12095	0.286325	Smu1	smu-1 suppressor of mec-8 and unc-52 homolog (C. elegans)
ENSMUSG00000028163	-0.778699	-1.11909	0.0195215	Nfkb1	nuclear factor of kappa light polypeptide gene enhancer in B cells 1, p105
ENSMUSG00000060397	-0.563799	-1.11883	-0.196373	Zfp128	zinc finger protein 128
ENSMUSG00000008475	0.169305	-1.11858	0.0465772	Arpc5	actin related protein 2/3 complex, subunit 5
ENSMUSG00000068732	-0.0396008	-1.11766	-1.35165	Tmem167b	transmembrane protein 167B
ENSMUSG00000087231	0.206165	-1.11715	-0.634793	E230016M11Rik	RIKEN cDNA E230016M11 gene
ENSMUSG00000024014	0	-1.11519	0.749782	Pim1	proviral integration site 1
ENSMUSG00000080904	0.13892	-1.11508	-0.687923	Gm11966	predicted gene 11966
ENSMUSG00000038374	0	-1.11357	0	Rbm8a	RNA binding motif protein 8a
ENSMUSG00000020919	0.912874	-1.11286	0.667894	Stat5b	signal transducer and activator of transcription 5B
ENSMUSG00000019861	0	-1.11248	0.21186	Gopc	golgi associated PDZ and coiled-coil motif containing
ENSMUSG00000028221	0	-1.1093	0.116146	Pip4p2	phosphatidylinositol-4,5-bisphosphate 4-phosphatase 2
ENSMUSG00000020964	1.34507	-1.10741	0.385392	Sel1l	sel-1 suppressor of lin-12-like (C. elegans)
ENSMUSG00000027087	-0.638505	-1.10611	-0.381023	Itgav	integrin alpha V
ENSMUSG00000059447	0.831615	-1.10486	-0.478517	Hadhb	hydroxyacyl-CoA dehydrogenase trifunctional multienzyme complex subunit beta
ENSMUSG00000039197	0	-1.10422	-0.934597	Adk	adenosine kinase
ENSMUSG00000038843	0.120403	-1.10337	0.25503	Gcnt1	glucosaminyl (N-acetyl) transferase 1, core 2
ENSMUSG00000027999	0.830808	-1.10323	-0.264472	Pla2g12a	phospholipase A2, group XIIA
ENSMUSG00000037012	-0.203269	-1.10044	-0.455472	Hk1	hexokinase 1
ENSMUSG00000031453	0.0138337	-1.10003	-0.0782927	Rasa3	RAS p21 protein activator 3
ENSMUSG00000039682	0	-1.09957	0.496197	Lap3	leucine aminopeptidase 3
ENSMUSG00000089640	-0.490791	-1.09483	-0.135112	Gm6397	predicted gene 6397
ENSMUSG00000049606	-0.253538	-1.0925	-0.535419	Zfp644	zinc finger protein 644
ENSMUSG00000032366	0.423053	-1.08956	-0.880825	Tpm1	tropomyosin 1, alpha
ENSMUSG00000097033	0.120403	-1.08943	-0.0274648	No assciated gene
ENSMUSG00000074818	-0.559451	-1.08896	-1.00425	Pdzd7	PDZ domain containing 7
ENSMUSG00000055652	0	-1.08789	0.634043	Klhl25	kelch-like 25
ENSMUSG00000027566	-0.393862	-1.08673	-0.220195	Psma7	proteasome subunit alpha 7
ENSMUSG00000000149	0	-1.08423	-0.0478641	Gna12	guanine nucleotide binding protein, alpha 12
ENSMUSG00000053684	0	-1.08394	0.808656	Kics2	KICSTOR subunit 2
ENSMUSG00000052681	-1.01396	-1.0837	-0.632355	Rap1b	RAS related protein 1b
ENSMUSG00000046865	1.43872	-1.0774	0.558565	Fbl	fibrillarin
ENSMUSG00000084061	0	-1.07645	0	Gm4996	predicted gene 4996
ENSMUSG00000021189	-0.280651	-1.07636	0.797441	Atxn3	ataxin 3
ENSMUSG00000032580	0.782128	-1.07559	-0.185532	Rbm5	RNA binding motif protein 5
ENSMUSG00000031818	1.4306	-1.07378	0.705034	Cox4i1	cytochrome c oxidase subunit 4I1
ENSMUSG00000027720	-0.0204723	-1.07316	0.560042	Il2	interleukin 2
ENSMUSG00000026519	0	-1.07271	-0.470828	Tmem63a	transmembrane protein 63a
ENSMUSG00000060803	0.235796	-1.07135	0.108857	Gstp1	glutathione S-transferase, pi 1
ENSMUSG00000015314	0	-1.07119	-0.443149	Slamf6	SLAM family member 6
ENSMUSG00000046591	0	-1.06989	-0.459173	Ticrr	TOPBP1-interacting checkpoint and replication regulator
ENSMUSG00000039153	-0.823331	-1.06961	-0.256223	Runx2	runt related transcription factor 2
ENSMUSG00000081305	-0.471395	-1.06872	-0.430373	Gm12879	predicted gene 12879
ENSMUSG00000083895	1.23853	-1.06772	-1.21194	Gm12074	predicted gene 12074
ENSMUSG00000026070	0	-1.06734	-0.521007	Il18r1	interleukin 18 receptor 1
ENSMUSG00000020737	-0.652436	-1.0668	-0.549077	Jpt1	Jupiter microtubule associated homolog 1
ENSMUSG00000089847	0.168716	-1.06204	0	Timm10b	translocase of inner mitochondrial membrane 10B
ENSMUSG00000028677	0.669977	-1.06075	0.660185	Rnf220	ring finger protein 220
ENSMUSG00000007029	0	-1.05828	0.700903	Vars	valyl-tRNA synthetase
ENSMUSG00000024991	1.31212	-1.05474	-0.513028	Eif3a	eukaryotic translation initiation factor 3, subunit A
ENSMUSG00000030930	-0.348564	-1.05076	0.289877	Chst15	carbohydrate sulfotransferase 15
ENSMUSG00000039461	0.963154	-1.05027	-1.14695	Tcta	T cell leukemia translocation altered gene
ENSMUSG00000015002	-0.328163	-1.05009	0.132351	Efr3a	EFR3 homolog A
ENSMUSG00000081441	-0.589673	-1.04905	-0.0906631	Gm6161	predicted gene 6161
ENSMUSG00000065599	0	-1.04634	0	Mir23b	microRNA 23b
ENSMUSG00000020415	0.372014	-1.04577	-1.06425	Pttg1	pituitary tumor-transforming gene 1
ENSMUSG00000028799	0.832259	-1.04431	0.759202	Zfp362	zinc finger protein 362
ENSMUSG00000091044	-0.699794	-1.04372	0.335173	No assciated gene
ENSMUSG00000025993	0	-1.0435	0.605472	Slc40a1	solute carrier family 40 (iron-regulated transporter), member 1
ENSMUSG00000028140	0	-1.04312	0.012883	Mrpl9	mitochondrial ribosomal protein L9
ENSMUSG00000027339	0	-1.0408	0.289042	Rassf2	Ras association (RalGDS/AF-6) domain family member 2
ENSMUSG00000026510	0.74118	-1.0408	-0.559099	Trp53bp2	transformation related protein 53 binding protein 2
ENSMUSG00000016409	0	-1.0386	0.748252	Nkap	NFKB activating protein
ENSMUSG00000038671	-0.407886	-1.03573	0.298709	Arfrp1	ADP-ribosylation factor related protein 1
ENSMUSG00000001229	-0.431241	-1.03501	0.738793	Dpp9	dipeptidylpeptidase 9
ENSMUSG00000066800	-0.570327	-1.03311	-0.997685	Rnasel	ribonuclease L (2', 5'-oligoisoadenylate synthetase-dependent)
ENSMUSG00000009681	0.148944	-1.03163	-0.515086	Bcr	BCR activator of RhoGEF and GTPase
ENSMUSG00000028643	0.168716	-1.0308	-0.413448	Svbp	small vasohibin binding protein
ENSMUSG00000075284	0.199823	-1.03	-1.18012	Wipf1	WAS/WASL interacting protein family, member 1
ENSMUSG00000002033	0	-1.02944	-0.359061	Cd3g	CD3 antigen, gamma polypeptide
ENSMUSG00000068480	0	-1.0282	0	Gm7551	predicted gene 7551
ENSMUSG00000005897	0	-1.02705	0.272292	Nr2c1	nuclear receptor subfamily 2, group C, member 1
ENSMUSG00000030162	0.200261	-1.02551	-0.354665	Olr1	oxidized low density lipoprotein (lectin-like) receptor 1
ENSMUSG00000094955	-0.404218	-1.02544	-0.396384	Gm3699	predicted gene 3699
ENSMUSG00000000738	-0.397958	-1.02535	-0.957102	Spg7	SPG7, paraplegin matrix AAA peptidase subunit
ENSMUSG00000021806	0	-1.02031	0.070116	Nid2	nidogen 2
ENSMUSG00000071793	0.885746	-1.02016	0.566884	2610005L07Rik	RIKEN cDNA 2610005L07 gene
ENSMUSG00000028964	0.266889	-1.01816	-0.715678	Park7	Parkinson disease (autosomal recessive, early onset) 7
ENSMUSG00000082768	0.234321	-1.01599	0.589147	Gm12727	predicted gene 12727
ENSMUSG00000039738	0.809329	-1.0149	-0.0396711	Slx4	SLX4 structure-specific endonuclease subunit homolog (S. cerevisiae)
ENSMUSG00000093930	0	-1.01297	-0.924201	Hmgcs1	3-hydroxy-3-methylglutaryl-Coenzyme A synthase 1
ENSMUSG00000081416	0.759914	-1.01194	0.102568	Gm14383	predicted gene 14383
ENSMUSG00000005687	0.545258	-1.01011	-0.122951	Bcas2	BCAS2 pre-mRNA processing factor
ENSMUSG00000022462	0.234846	-1.00687	-1.17945	Slc38a2	solute carrier family 38, member 2
ENSMUSG00000040681	-0.992067	-1.00543	-0.561905	Hmgn1	high mobility group nucleosomal binding domain 1
ENSMUSG00000083166	0.471987	-1.00507	-0.221652	Gm8648	predicted gene 8648
ENSMUSG00000003849	0.200261	-1.00448	-1.12563	Nqo1	NAD(P)H dehydrogenase, quinone 1
ENSMUSG00000032372	0	-1.0042	-0.0155038	Plscr2	phospholipid scramblase 2
ENSMUSG00000035382	0.0146723	-1.00347	-0.808627	Pcsk7	proprotein convertase subtilisin/kexin type 7
ENSMUSG00000096579	-0.901791	-1.00332	-0.665964	Gm17121	predicted gene 17121
ENSMUSG00000031839	0.590227	-1.00125	0.737237	Hsbp1	heat shock factor binding protein 1
ENSMUSG00000031389	-0.884051	-0.996023	0.499223	Arhgap4	Rho GTPase activating protein 4
ENSMUSG00000044576	0	-0.995536	0	Garem2	GRB2 associated regulator of MAPK1 subtype 2
ENSMUSG00000017386	-0.457834	-0.995399	-0.240381	Traf4	TNF receptor associated factor 4
ENSMUSG00000057375	0.200261	-0.993967	-1.21507	Yipf1	Yip1 domain family, member 1
ENSMUSG00000070111	0	-0.99203	-0.287036	Gm10286	predicted gene 10286
ENSMUSG00000065475	0	-0.99203	0	Mir27b	microRNA 27b
ENSMUSG00000081189	-0.829785	-0.991371	-0.0324435	Hspd1-ps4	heat shock protein 1 (chaperonin), pseudogene 4
ENSMUSG00000035258	0.3364	-0.989772	-0.850735	Abi3bp	ABI family member 3 binding protein
ENSMUSG00000044674	0.503574	-0.989237	-0.265331	Fzd1	frizzled class receptor 1
ENSMUSG00000025872	-0.0627551	-0.98834	-0.0334707	Thoc3	THO complex 3
ENSMUSG00000017754	0	-0.98807	0.0457531	Pltp	phospholipid transfer protein
ENSMUSG00000044827	0.796412	-0.98807	0.404999	Tlr1	toll-like receptor 1
ENSMUSG00000029253	-0.195922	-0.987787	-0.583843	Cenpc1	centromere protein C1
ENSMUSG00000020882	0	-0.987692	-0.153413	Cacnb1	calcium channel, voltage-dependent, beta 1 subunit
ENSMUSG00000042032	0.552786	-0.986293	-0.352397	Mat2b	methionine adenosyltransferase II, beta
ENSMUSG00000084284	-0.403373	-0.985358	-0.698805	Tpt1-ps6	tumor protein, translationally-controlled, pseudogene 6
ENSMUSG00000033186	0.978305	-0.985145	-0.490613	Mzt1	mitotic spindle organizing protein 1
ENSMUSG00000097903	0.700833	-0.985055	0.669749	Gm26679	predicted gene, 26679
ENSMUSG00000028332	0.387292	-0.984352	0.402727	Hemgn	hemogen
ENSMUSG00000078183	0.168716	-0.983519	-0.533838	Gm15610	predicted gene 15610
ENSMUSG00000028879	0	-0.983288	-0.0779504	Stx12	syntaxin 12
ENSMUSG00000019433	0.012242	-0.983019	-0.443878	Gipc1	GIPC PDZ domain containing family, member 1
ENSMUSG00000008683	0.580671	-0.980099	-0.357713	Rps15a	ribosomal protein S15A
ENSMUSG00000003190	0	-0.979809	0.695297	Bcl2l12	BCL2-like 12 (proline rich)
ENSMUSG00000031103	0.456803	-0.979809	0.26329	Elf4	E74-like factor 4 (ets domain transcription factor)
ENSMUSG00000097414	0.471394	-0.977541	-0.201451	B130046B21Rik	RIKEN cDNA B130046B21 gene
ENSMUSG00000041058	-0.985534	-0.974174	-0.312035	Wwp1	WW domain containing E3 ubiquitin protein ligase 1
ENSMUSG00000045826	-0.0432211	-0.971762	-0.562238	Ptprcap	protein tyrosine phosphatase receptor type C polypeptide-associated protein
ENSMUSG00000037808	-0.197065	-0.971574	-0.543861	Fam76b	family with sequence similarity 76, member B
ENSMUSG00000036615	0	-0.97036	-0.0734347	Rfxap	regulatory factor X-associated protein
ENSMUSG00000020536	0.905765	-0.969477	0.792436	Llgl1	LLGL1 scribble cell polarity complex component
ENSMUSG00000023973	0.215	-0.968792	0.231142	Cnpy3	canopy FGF signaling regulator 3
ENSMUSG00000029386	-0.972986	-0.966947	-0.383593	No assciated gene
ENSMUSG00000084319	-0.0143931	-0.966	-0.610181	Tpt1-ps3	tumor protein, translationally-controlled, pseudogene 3
ENSMUSG00000054814	0	-0.965115	-0.378694	Usp46	ubiquitin specific peptidase 46
ENSMUSG00000066809	-0.702596	-0.962467	-0.404711	Gm10180	predicted gene 10180
ENSMUSG00000083859	0.933357	-0.959364	-0.628528	Gm12003	predicted gene 12003
ENSMUSG00000062376	0.0894934	-0.957935	0.157939	Borcs7	BLOC-1 related complex subunit 7
ENSMUSG00000080059	-0.197065	-0.954392	-0.197663	Rps19-ps3	ribosomal protein S19, pseudogene 3
ENSMUSG00000027167	0	-0.952163	0.467927	Elp4	elongator acetyltransferase complex subunit 4
ENSMUSG00000027612	0.168716	-0.952163	0.243692	Mmp24	matrix metallopeptidase 24
ENSMUSG00000074649	0	-0.952163	0.166673	Mmp24os1	matrix metallopeptidase 24 opposite strand transcript 1
ENSMUSG00000093282	1.01092	-0.951587	-0.857613	No assciated gene
ENSMUSG00000051228	-0.197065	-0.949744	0.304494	Nyx	nyctalopin
ENSMUSG00000023009	-0.339161	-0.949504	-0.196373	Nckap5l	NCK-associated protein 5-like
ENSMUSG00000081953	-0.104068	-0.948245	-0.740084	Gm12435	predicted gene 12435
ENSMUSG00000032192	0	-0.947261	-0.506656	Gnb5	guanine nucleotide binding protein (G protein), beta 5
ENSMUSG00000021371	-0.619117	-0.947081	0.186044	Mcur1	mitochondrial calcium uniporter regulator 1
ENSMUSG00000042485	0.507297	-0.946355	-0.240247	Mustn1	musculoskeletal, embryonic nuclear protein 1
ENSMUSG00000045709	0.200261	-0.946254	-0.327971	Smkr-ps	smal lysine rich protein 1, pseudogene
ENSMUSG00000019818	0.47738	-0.945588	-0.989948	Cd164	CD164 antigen
ENSMUSG00000026986	0	-0.943264	0.191627	Hnmt	histamine N-methyltransferase
ENSMUSG00000051811	-0.160738	-0.942031	0.477529	Cox6b2	cytochrome c oxidase subunit 6B2
ENSMUSG00000001098	-0.0272068	-0.94192	0.497354	Kctd10	potassium channel tetramerisation domain containing 10
ENSMUSG00000066952	0.511268	-0.94192	-0.282135	Myo1h	myosin 1H
ENSMUSG00000037221	-0.858783	-0.941241	0	Mospd3	motile sperm domain containing 3
ENSMUSG00000021824	0.28801	-0.938738	-1.00558	Ap3m1	adaptor-related protein complex 3, mu 1 subunit
ENSMUSG00000022747	0.941441	-0.933954	0.454825	St3gal6	ST3 beta-galactoside alpha-2,3-sialyltransferase 6
ENSMUSG00000068617	0.168716	-0.933757	-0.606299	Clxn	calaxin
ENSMUSG00000051166	0.555381	-0.931622	0.403481	Eml5	echinoderm microtubule associated protein like 5
ENSMUSG00000093392	1.06973	-0.931487	0.58184	Gm6061	predicted gene 6061
ENSMUSG00000062312	0	-0.929953	-0.370988	Erbb2	erb-b2 receptor tyrosine kinase 2
ENSMUSG00000024516	1.00366	-0.929502	0.675998	Sec11c	SEC11 homolog C, signal peptidase complex subunit
ENSMUSG00000053175	0	-0.92913	-0.256169	Bcl3	B cell leukemia/lymphoma 3
ENSMUSG00000087138	0	-0.92913	0.276136	Gm15545	predicted gene 15545
ENSMUSG00000037257	0	-0.927816	0.145153	Aagab	alpha- and gamma-adaptin binding protein
ENSMUSG00000021963	-0.705831	-0.925685	0.0684814	Sap18	Sin3-associated polypeptide 18
ENSMUSG00000097867	0.531951	-0.923793	0.588166	No assciated gene
ENSMUSG00000070953	0	-0.923464	0	Rabepk	Rab9 effector protein with kelch motifs
ENSMUSG00000046519	0.320953	-0.922339	0.535726	Golph3l	golgi phosphoprotein 3-like
ENSMUSG00000026864	0	-0.92175	-0.371429	Hspa5	heat shock protein 5
ENSMUSG00000066538	-0.339161	-0.920243	0	Gm6254	predicted gene 6254
ENSMUSG00000078184	0	-0.91927	0	Rbm8a2	RNA binding motif protein 8A2
ENSMUSG00000053472	0	-0.916859	-0.096557	Gm13534	predicted gene 13534
ENSMUSG00000016503	0	-0.916859	0.326404	Gtf3a	general transcription factor III A
ENSMUSG00000016510	0.168716	-0.916859	0.517225	Mtif3	mitochondrial translational initiation factor 3
ENSMUSG00000097028	0	-0.916859	0.270491	Ptgs2os	prostaglandin-endoperoxide synthase 2, opposite strand
ENSMUSG00000039463	1.19029	-0.916365	-0.69301	Slc9a8	solute carrier family 9 (sodium/hydrogen exchanger), member 8
ENSMUSG00000049760	0	-0.909862	-0.256169	Micos13	mitochondrial contact site and cristae organizing system subunit 13
ENSMUSG00000094683	0	-0.90922	-0.374602	Ap3m1-ps	adaptor-related protein complex 3, mu 1 subunit, pseudogene
ENSMUSG00000080746	-0.339161	-0.90857	-0.63172	Rpsa-ps12	ribosomal protein SA, pseudogene 12
ENSMUSG00000030268	0.580284	-0.90589	-0.694596	Bcat1	branched chain aminotransferase 1, cytosolic
ENSMUSG00000083555	0	-0.90589	0	Gm12035	predicted gene 12035
ENSMUSG00000061273	0.235796	-0.90589	-0.199621	Mmgt1	membrane magnesium transporter 1
ENSMUSG00000052713	0	-0.905728	-0.225775	Zfp608	zinc finger protein 608
ENSMUSG00000086474	0	-0.904748	0	9130204K15Rik	RIKEN cDNA 9130204K15 gene
ENSMUSG00000098343	0.470921	-0.904748	0.140527	Mir6240	microRNA 6240
ENSMUSG00000039987	-0.701073	-0.904131	-0.0272922	Phtf2	putative homeodomain transcription factor 2
ENSMUSG00000082204	0	-0.903128	-0.127467	Gm7722	predicted gene 7722
ENSMUSG00000042938	0.234846	-0.902006	0.34604	Gm14117	predicted gene 14117
ENSMUSG00000031479	0	-0.901357	0.263191	Vps36	vacuolar protein sorting 36
ENSMUSG00000056412	1.10048	-0.896972	0.0943518	Psenen-ps	presenilin enhancer gamma secretase subunit, pseudogene
ENSMUSG00000048174	0	-0.893813	-0.464655	Tmem81	transmembrane protein 81
ENSMUSG00000034902	0	-0.890608	0.306232	Pip5k1c	phosphatidylinositol-4-phosphate 5-kinase, type 1 gamma
ENSMUSG00000082466	0.266889	-0.890306	0.136521	No assciated gene
ENSMUSG00000029250	0.120403	-0.888322	0.496235	Polr2b	polymerase (RNA) II (DNA directed) polypeptide B
ENSMUSG00000026576	1.16564	-0.88466	-0.455253	Atp1b1	ATPase, Na+/K+ transporting, beta 1 polypeptide
ENSMUSG00000058558	0.0690418	-0.882791	0.432874	Rpl5	ribosomal protein L5
ENSMUSG00000040331	-0.339892	-0.881234	-0.000514003	Nsmce4a	NSE4 homolog A, SMC5-SMC6 complex component
ENSMUSG00000064373	1.12493	-0.88077	0.162579	Selenop	selenoprotein P
ENSMUSG00000027088	-0.0388485	-0.880606	0.394453	Phospho2	phosphatase, orphan 2
ENSMUSG00000069495	-0.0407634	-0.880043	-0.384078	Epc2	enhancer of polycomb homolog 2
ENSMUSG00000032757	0.120403	-0.879566	-0.0994748	Bet1	Bet1 golgi vesicular membrane trafficking protein
ENSMUSG00000054414	-0.142827	-0.878802	0.121098	Slc30a7	solute carrier family 30 (zinc transporter), member 7
ENSMUSG00000033499	0.163846	-0.87744	-0.601467	Larp4b	La ribonucleoprotein 4B
ENSMUSG00000049643	0.168716	-0.875738	-0.304901	2310022A10Rik	RIKEN cDNA 2310022A10 gene
ENSMUSG00000032217	0.200261	-0.875738	-0.408655	Rnf111	ring finger 111
ENSMUSG00000083823	-0.19114	-0.875651	-0.0317834	Amd-ps1	S-adenosylmethionine decarboxylase, pseudogene 1
ENSMUSG00000089659	0	-0.873353	0	Gm3470	predicted gene 3470
ENSMUSG00000019969	0	-0.869978	0.18254	Psen1	presenilin 1
ENSMUSG00000027367	0	-0.868672	0.187063	Stard7	START domain containing 7
ENSMUSG00000036138	0.168716	-0.868393	-0.426838	Acaa1a	acetyl-Coenzyme A acyltransferase 1A
ENSMUSG00000027406	0.489705	-0.867612	0.483553	Idh3b	isocitrate dehydrogenase 3 (NAD+) beta
ENSMUSG00000019897	0.74118	-0.862197	0.0168895	Ccdc59	coiled-coil domain containing 59
ENSMUSG00000029394	-0.3676	-0.86209	-0.476415	Cdk2ap1	cyclin dependent kinase 2 associated protein 1
ENSMUSG00000020087	0	-0.857469	0.124453	Tysnd1	trypsin domain containing 1
ENSMUSG00000051412	0.453029	-0.856047	-0.400225	No assciated gene
ENSMUSG00000058979	0.266889	-0.853562	0.234799	Hdhd5	haloacid dehalogenase like hydrolase domain containing 5
ENSMUSG00000053286	0.266889	-0.853562	-0.598553	Trmt1l	tRNA methyltransferase 1 like
ENSMUSG00000028042	0	-0.853562	0.194698	Zbtb7b	zinc finger and BTB domain containing 7B
ENSMUSG00000025323	0.647553	-0.85224	-0.570782	Sp4	trans-acting transcription factor 4
ENSMUSG00000040767	0.168716	-0.851228	0.0398592	Snrnp25	small nuclear ribonucleoprotein 25 (U11/U12)
ENSMUSG00000038417	0.74118	-0.850752	-0.291812	Fig4	FIG4 phosphoinositide 5-phosphatase
ENSMUSG00000020072	0.168716	-0.850752	-0.0674858	Pbld2	phenazine biosynthesis-like protein domain containing 2
ENSMUSG00000024393	0	-0.849845	-0.510979	Prrc2a	proline-rich coiled-coil 2A
ENSMUSG00000076137	0.644695	-0.84961	-0.577345	No assciated gene
ENSMUSG00000063684	-0.197065	-0.848046	-0.560004	Hadhb-ps	hydroxyacyl-CoA dehydrogenase trifunctional multienzyme complex subunit beta, pseudogene
ENSMUSG00000026933	0.168716	-0.847436	-0.0918132	Camsap1	calmodulin regulated spectrin-associated protein 1
ENSMUSG00000022023	0.390258	-0.84479	-0.0738745	Wbp4	WW domain binding protein 4
ENSMUSG00000032002	0.902271	-0.844444	-0.431605	Dcun1d5	DCN1, defective in cullin neddylation 1, domain containing 5 (S. cerevisiae)
ENSMUSG00000030275	0.959936	-0.843925	0.0951139	Etnk1	ethanolamine kinase 1
ENSMUSG00000020400	0.335985	-0.842984	-0.0396607	Tnip1	TNFAIP3 interacting protein 1
ENSMUSG00000083468	0	-0.83461	0.136521	Gm9431	predicted gene 9431
ENSMUSG00000087108	0	-0.832421	-0.225022	Gm16093	predicted gene 16093
ENSMUSG00000045817	0.520538	-0.832332	-0.37213	Zfp36l2	zinc finger protein 36, C3H type-like 2
ENSMUSG00000017291	0.127588	-0.832148	-0.587394	Taok1	TAO kinase 1
ENSMUSG00000033799	0.815448	-0.828799	0.50061	Tasor2	transcription activation suppressor family member 2
ENSMUSG00000048040	0	-0.828596	0.306203	Arxes2	adipocyte-related X-chromosome expressed sequence 2
ENSMUSG00000084081	0.902271	-0.823225	-0.208547	Gm12057	predicted gene 12057
ENSMUSG00000037706	0.634789	-0.822788	0.467488	Cd81	CD81 antigen
ENSMUSG00000006699	0.703979	-0.820428	-0.23329	Cdc42	cell division cycle 42
ENSMUSG00000098281	0	-0.819362	-0.13594	No assciated gene
ENSMUSG00000004591	0.168716	-0.814771	-0.0914265	Pkn2	protein kinase N2
ENSMUSG00000030111	0.123888	-0.812327	-0.183822	A2m	alpha-2-macroglobulin
ENSMUSG00000035148	0	-0.809184	-0.123638	Gpr33	G protein-coupled receptor 33
ENSMUSG00000029364	0	-0.809184	-0.259169	Wsb2	WD repeat and SOCS box-containing 2
ENSMUSG00000021196	0.0267049	-0.804331	-0.324609	Pfkp	phosphofructokinase, platelet
ENSMUSG00000083033	0.235796	-0.804233	-0.544403	Gm9083	predicted gene 9083
ENSMUSG00000082070	0.168716	-0.804143	-0.0141825	Gm1866	predicted gene 1866
ENSMUSG00000084808	0.168716	-0.801742	0	9430091E24Rik	RIKEN cDNA 9430091E24 gene
ENSMUSG00000093037	0	-0.798966	0	Mir3066	microRNA 3066
ENSMUSG00000002428	0	-0.798702	0	Hltf	helicase-like transcription factor
ENSMUSG00000022400	0.376907	-0.798554	0.242644	Rbx1	ring-box 1
ENSMUSG00000097121	0	-0.798481	0	D130020L05Rik	RIKEN cDNA D130020L05 gene
ENSMUSG00000036273	0	-0.797616	-0.365851	Lrrk2	leucine-rich repeat kinase 2
ENSMUSG00000047281	0	-0.796973	-0.0691156	Sfn	stratifin
ENSMUSG00000047731	0.894955	-0.788372	0.433057	Wbp1l	WW domain binding protein 1 like
ENSMUSG00000022370	0.598475	-0.787127	-0.538042	Mrpl13	mitochondrial ribosomal protein L13
ENSMUSG00000035299	0.428822	-0.785128	0.206613	Mid1	midline 1
ENSMUSG00000008540	0.200261	-0.781068	-0.121823	Mgst1	microsomal glutathione S-transferase 1
ENSMUSG00000049969	0.335985	-0.780819	0.117059	Plekhf2	pleckstrin homology domain containing, family F (with FYVE domain) member 2
ENSMUSG00000088819	0	-0.777375	-0.36835	No assciated gene
ENSMUSG00000030304	0.665895	-0.776375	-0.565604	Ergic2	ERGIC and golgi 2
ENSMUSG00000027455	0.711855	-0.772516	0.262995	Nsfl1c	NSFL1 (p97) cofactor (p47)
ENSMUSG00000022761	0.235796	-0.770747	0.0453793	Lztr1	leucine-zipper-like transcriptional regulator, 1
ENSMUSG00000073486	0.641921	-0.769516	0.182274	Gm10518	predicted gene 10518
ENSMUSG00000032897	0.3364	-0.766067	-0.21828	Nfyc	nuclear transcription factor-Y gamma
ENSMUSG00000087187	0.685862	-0.764359	-0.227104	Gm13431	predicted gene 13431
ENSMUSG00000082541	0.3364	-0.759933	0.111974	Gm9095	predicted gene 9095
ENSMUSG00000081230	0.434232	-0.759933	-0.0297084	Gm9097	predicted gene 9097
ENSMUSG00000014353	0.390258	-0.759933	-0.321283	Tmem87b	transmembrane protein 87B
ENSMUSG00000041028	0.763724	-0.744046	-0.342438	Ghitm	growth hormone inducible transmembrane protein
ENSMUSG00000064254	0.654959	-0.741619	-0.096557	Ethe1	ethylmalonic encephalopathy 1
ENSMUSG00000045503	0.677734	-0.735364	0.0832842	Sys1	SYS1 Golgi-localized integral membrane protein homolog (S. cerevisiae)
ENSMUSG00000073131	0.617293	-0.734815	-0.410906	Vma21	VMA21 vacuolar H+-ATPase homolog (S. cerevisiae)
ENSMUSG00000071632	0.620509	-0.721617	-0.196373	2510002D24Rik	RIKEN cDNA 2510002D24 gene
ENSMUSG00000081275	0.731172	-0.695868	-0.16342	Gm13875	predicted gene 13875
ENSMUSG00000028385	0.867937	-0.693005	-0.307388	Snx30	sorting nexin family member 30

## Sheet: Cluster 3
Gene ID	Day 4	Day 7	Day 35	Gene Symbol	Gene name
ENSMUSG00000045690	-0.625419	4.95112	-0.088819	Wdr89	WD repeat domain 89
ENSMUSG00000025508	-0.590978	4.70481	0.134871	Rplp2	ribosomal protein, large P2
ENSMUSG00000034201	-2.56824	4.55227	-0.578438	Gas2l1	growth arrest-specific 2 like 1
ENSMUSG00000031872	1.58901	4.51443	-2.13853	Bean1	brain expressed, associated with Nedd4, 1
ENSMUSG00000035329	0.0441786	4.4991	-1.88086	Fbxo33	F-box protein 33
ENSMUSG00000083429	0.308819	4.39905	-0.0821959	Gm15198	predicted gene 15198
ENSMUSG00000084106	0.663106	4.3493	-0.275702	Gm6136	predicted pseudogene 6136
ENSMUSG00000001017	-0.291975	4.3179	0.186289	Chtop	chromatin target of PRMT1
ENSMUSG00000004099	-0.120386	4.13212	0.961026	Dnmt1	DNA methyltransferase (cytosine-5) 1
ENSMUSG00000087626	3.06463	4.06416	0.972085	Gm15050	predicted gene 15050
ENSMUSG00000083992	-0.523333	4.03345	-2.78943	Gm11478	predicted gene 11478
ENSMUSG00000043488	1.71765	3.9556	-0.337613	Frmd8os	FERM domain containing 8, opposite strand
ENSMUSG00000079437	0.193931	3.91993	-0.807356	No assciated gene
ENSMUSG00000037972	1.80588	3.87029	-0.224885	Snn	stannin
ENSMUSG00000029614	0.651532	3.84425	-0.333521	Rpl6	ribosomal protein L6
ENSMUSG00000074661	-0.123868	3.8003	0.552087	No assciated gene
ENSMUSG00000071415	0.165916	3.79811	-0.444163	Rpl23	ribosomal protein L23
ENSMUSG00000038712	0.652891	3.79032	-1.43007	Mindy1	MINDY lysine 48 deubiquitinase 1
ENSMUSG00000079363	-2.01262	3.70003	0.480875	Gbp4	guanylate binding protein 4
ENSMUSG00000026969	2.2919	3.67579	0.389651	Fam166a	family with sequence similarity 166, member A
ENSMUSG00000000001	1.39812	3.67428	-0.232921	Gnai3	guanine nucleotide binding protein (G protein), alpha inhibiting 3
ENSMUSG00000082774	-0.325852	3.6211	0.0591709	Gm8805	predicted gene 8805
ENSMUSG00000031133	-1.98006	3.58661	-0.0925767	Arhgef6	Rac/Cdc42 guanine nucleotide exchange factor (GEF) 6
ENSMUSG00000073639	0.0639401	3.58557	-0.468422	Rab18	RAB18, member RAS oncogene family
ENSMUSG00000043716	1.21274	3.58316	0.322537	Rpl7	ribosomal protein L7
ENSMUSG00000000184	-1.10514	3.50154	0.216486	Ccnd2	cyclin D2
ENSMUSG00000028522	2.28806	3.46357	-0.44734	Mier1	MEIR1 treanscription regulator
ENSMUSG00000080776	0.939056	3.42914	0.162108	Gm12174	predicted gene 12174
ENSMUSG00000046434	-0.167156	3.42098	1.1928	Hnrnpa1	heterogeneous nuclear ribonucleoprotein A1
ENSMUSG00000074129	-0.188502	3.4146	-1.57569	Rpl13a	ribosomal protein L13A
ENSMUSG00000043263	0.0510966	3.37328	-0.781963	Ifi209	interferon activated gene 209
ENSMUSG00000044857	-0.335649	3.37043	-0.926915	Lemd2	LEM domain containing 2
ENSMUSG00000024515	-0.399213	3.36614	0.517275	Smad4	SMAD family member 4
ENSMUSG00000054823	2.77064	3.2961	1.29302	Nsd3	nuclear receptor binding SET domain protein 3
ENSMUSG00000091086	0.696023	3.2931	0.317044	Rpl6l	ribosomal protein L6-like
ENSMUSG00000064336	0.898054	3.28709	-0.887612	mt-Tf	mitochondrially encoded tRNA phenylalanine
ENSMUSG00000026034	0.471394	3.25243	-0.893902	Clk1	CDC-like kinase 1
ENSMUSG00000068923	2.80268	3.24865	-0.40287	Syt11	synaptotagmin XI
ENSMUSG00000005625	-1.2242	3.21591	-0.664823	Psmd4	proteasome (prosome, macropain) 26S subunit, non-ATPase, 4
ENSMUSG00000079419	-1.01139	3.19398	0.638492	Ms4a6c	membrane-spanning 4-domains, subfamily A, member 6C
ENSMUSG00000015702	1.01147	3.17761	-1.2395	Anxa9	annexin A9
ENSMUSG00000007659	1.52591	3.176	0.246132	Bcl2l1	BCL2-like 1
ENSMUSG00000042699	0.364438	3.17493	-0.801436	Dhx9	DEAH (Asp-Glu-Ala-His) box polypeptide 9
ENSMUSG00000001289	0.309142	3.16782	0.850578	Pfdn5	prefoldin 5
ENSMUSG00000097838	0.266889	3.15345	-0.704627	No assciated gene
ENSMUSG00000058672	1.1335	3.11569	1.24839	Tubb2a	tubulin, beta 2A class IIA
ENSMUSG00000039997	-0.760723	3.10299	1.0948	Ifi203	interferon activated gene 203
ENSMUSG00000035183	-1.89385	3.09951	-0.456862	Slc24a5	solute carrier family 24, member 5
ENSMUSG00000047965	-0.24098	3.09067	-0.518906	Rpl9-ps7	ribosomal protein L9, pseudogene 7
ENSMUSG00000024816	1.77207	3.09029	-0.31007	Frmd8	FERM domain containing 8
ENSMUSG00000037685	0.256648	3.0834	0.239404	Atp8a1	ATPase, aminophospholipid transporter (APLT), class I, type 8A, member 1
ENSMUSG00000079018	0.513714	3.07741	0.55176	Ly6c1	lymphocyte antigen 6 complex, locus C1
ENSMUSG00000060591	-0.015595	3.04186	0.062117	Ifitm2	interferon induced transmembrane protein 2
ENSMUSG00000080921	-1.6106	3.02347	0.400593	Rpl38-ps2	ribosomal protein L38, pseudogene 2
ENSMUSG00000082475	0.0487816	3.02004	0.11879	Gm7206	predicted pseudogene 7206
ENSMUSG00000025933	-0.0766619	3.01568	-0.69148	Tmem14a	transmembrane protein 14A
ENSMUSG00000020788	2.33522	3.00917	-0.947224	Atp2a3	ATPase, Ca++ transporting, ubiquitous
ENSMUSG00000047459	-0.580824	3.00638	-0.303102	Dynlrb1	dynein light chain roadblock-type 1
ENSMUSG00000029004	-1.23088	3.00441	-2.29565	Kmt2e	lysine (K)-specific methyltransferase 2E
ENSMUSG00000020463	0.0709661	2.95583	-1.33181	Ppp4r3b	protein phosphatase 4 regulatory subunit 3B
ENSMUSG00000075014	0.487349	2.95396	-1.26753	Gm10800	predicted gene 10800
ENSMUSG00000032872	-1.10131	2.95357	-0.536463	Cyb5r4	cytochrome b5 reductase 4
ENSMUSG00000032097	0.810112	2.9484	-1.02924	Ddx6	DEAD (Asp-Glu-Ala-Asp) box polypeptide 6
ENSMUSG00000058793	0.595527	2.9446	1.11253	Cds2	CDP-diacylglycerol synthase (phosphatidate cytidylyltransferase) 2
ENSMUSG00000022498	0.439282	2.93781	0.396294	Txndc11	thioredoxin domain containing 11
ENSMUSG00000032740	-0.0279569	2.93741	0.3413	Ccdc88a	coiled coil domain containing 88A
ENSMUSG00000018796	-0.0506854	2.91217	1.4854	Acsl1	acyl-CoA synthetase long-chain family member 1
ENSMUSG00000007892	-1.23285	2.90184	-0.381133	Rplp1	ribosomal protein, large, P1
ENSMUSG00000043964	0.0984085	2.88861	0.985958	Orai3	ORAI calcium release-activated calcium modulator 3
ENSMUSG00000059159	-1.71959	2.88679	-0.0526267	Gm8129	predicted pseudogene 8129
ENSMUSG00000057605	0.635813	2.87871	0.193045	Gm6807	predicted gene 6807
ENSMUSG00000031776	0.478377	2.87633	0.12432	Arl2bp	ADP-ribosylation factor-like 2 binding protein
ENSMUSG00000059119	0.72683	2.87486	-0.89245	Nap1l4	nucleosome assembly protein 1-like 4
ENSMUSG00000024855	-1.23409	2.86825	-0.326635	Pacs1	phosphofurin acidic cluster sorting protein 1
ENSMUSG00000063882	-0.6945	2.85113	1.14306	Uqcrh	ubiquinol-cytochrome c reductase hinge protein
ENSMUSG00000029106	-1.50646	2.84712	-0.417995	Add1	adducin 1 (alpha)
ENSMUSG00000032497	1.95053	2.84332	0.00359243	Lrrfip2	leucine rich repeat (in FLII) interacting protein 2
ENSMUSG00000029465	0.359736	2.83739	0.284653	Arpc3	actin related protein 2/3 complex, subunit 3
ENSMUSG00000026849	-0.0613034	2.83456	0.507744	Tor1a	torsin family 1, member A (torsin A)
ENSMUSG00000070501	-0.170446	2.81262	0.112572	Ifi214	interferon activated gene 214
ENSMUSG00000090000	1.5901	2.8085	0.156547	Ier3ip1	immediate early response 3 interacting protein 1
ENSMUSG00000094989	0.173289	2.80143	-0.253337	Rpl9-ps4	ribosomal protein L9, pseudogene 4
ENSMUSG00000033671	-0.225146	2.80002	-0.548102	Cep350	centrosomal protein 350
ENSMUSG00000025607	1.53282	2.79546	-0.535542	Copg2	coatomer protein complex, subunit gamma 2
ENSMUSG00000086745	0.151913	2.79028	-0.120718	Tspan2os	tetraspanin 2, opposite strand
ENSMUSG00000027447	1.25116	2.79027	1.24503	Cst3	cystatin C
ENSMUSG00000048429	-0.856348	2.77732	0.486586	Timm29	translocase of inner mitochondrial membrane 29
ENSMUSG00000052299	-0.488269	2.76445	-0.569466	Ltn1	listerin E3 ubiquitin protein ligase 1
ENSMUSG00000006418	0.925842	2.75404	0.981457	Rnf114	ring finger protein 114
ENSMUSG00000062456	0.128137	2.74633	0.503278	Rpl9-ps6	ribosomal protein L9, pseudogene 6
ENSMUSG00000097312	2.37993	2.74115	-0.885258	No assciated gene
ENSMUSG00000062014	1.51438	2.74056	-0.465537	Gmfb	glia maturation factor, beta
ENSMUSG00000043131	1.2831	2.72866	-1.99352	Mob1a	MOB kinase activator 1A
ENSMUSG00000024054	-0.520391	2.72074	1.16025	Smchd1	SMC hinge domain containing 1
ENSMUSG00000047215	0.110555	2.7192	0.825816	Rpl9	ribosomal protein L9
ENSMUSG00000030055	1.10663	2.712	1.13729	Rab43	RAB43, member RAS oncogene family
ENSMUSG00000040481	-0.591151	2.70944	-2.34401	Bptf	bromodomain PHD finger transcription factor
ENSMUSG00000027997	-1.53498	2.70876	0.32711	Casp6	caspase 6
ENSMUSG00000060739	0.861583	2.69476	-0.286716	Nsa2	NSA2 ribosome biogenesis homolog
ENSMUSG00000018548	-0.158066	2.67852	0.0884468	Trim37	tripartite motif-containing 37
ENSMUSG00000081461	0.862602	2.67193	-1.33291	Rpl30-ps11	ribosomal protein L30, pseudogene 11
ENSMUSG00000021252	-0.517279	2.64844	-0.782385	Erg28	ergosterol biosynthesis 28
ENSMUSG00000024812	1.38187	2.64714	1.15624	Tjp2	tight junction protein 2
ENSMUSG00000059895	0.131202	2.64224	-0.0233422	Ptp4a3	protein tyrosine phosphatase 4a3
ENSMUSG00000090278	0.552834	2.63764	-1.04704	No assciated gene
ENSMUSG00000016255	0.612772	2.63364	-1.52801	Tubb1	tubulin, beta 1 class VI
ENSMUSG00000038127	0.68001	2.62561	0.0281735	Ccdc50	coiled-coil domain containing 50
ENSMUSG00000025967	-1.92697	2.6174	-0.479462	Eef1b2	eukaryotic translation elongation factor 1 beta 2
ENSMUSG00000063838	0.152227	2.61336	-0.837929	Cdc42ep5	CDC42 effector protein (Rho GTPase binding) 5
ENSMUSG00000057322	-1.24561	2.60273	0.139791	Rpl38	ribosomal protein L38
ENSMUSG00000030352	-0.822874	2.59699	-0.492484	Tspan9	tetraspanin 9
ENSMUSG00000052144	0.429385	2.59599	-0.245217	Ppp4r2	protein phosphatase 4, regulatory subunit 2
ENSMUSG00000063646	-0.159791	2.59582	-0.115371	Jakmip1	janus kinase and microtubule interacting protein 1
ENSMUSG00000020484	1.71556	2.57778	0.37498	Xbp1	X-box binding protein 1
ENSMUSG00000060019	-1.34027	2.57179	-0.742552	Gm10073	predicted pseudogene 10073
ENSMUSG00000027009	1.78988	2.55879	-1.40176	Itga4	integrin alpha 4
ENSMUSG00000040848	0.545258	2.55825	1.43938	Sft2d2	SFT2 domain containing 2
ENSMUSG00000033880	1.18054	2.55525	0.458291	Lgals3bp	lectin, galactoside-binding, soluble, 3 binding protein
ENSMUSG00000052040	0.951862	2.553	-0.121341	Klf13	Kruppel-like transcription factor 13
ENSMUSG00000036461	-0.159664	2.5445	-0.842965	Elf1	E74 like ETS transcription factor 1
ENSMUSG00000021675	0.287871	2.53064	-1.30035	F2rl2	coagulation factor II (thrombin) receptor-like 2
ENSMUSG00000072109	2.13519	2.52699	-0.511915	A530040E14Rik	RIKEN cDNA A530040E14 gene
ENSMUSG00000042599	-0.845398	2.51909	1.09022	Kdm7a	lysine (K)-specific demethylase 7A
ENSMUSG00000001946	-0.0657467	2.51014	-0.512909	Esam	endothelial cell-specific adhesion molecule
ENSMUSG00000056290	0.861133	2.50568	0.763061	Ms4a4b	membrane-spanning 4-domains, subfamily A, member 4B
ENSMUSG00000089628	0.129714	2.5016	0.482284	Gm9727	predicted gene 9727
ENSMUSG00000072872	0.194855	2.49986	0.792094	Rybp	RING1 and YY1 binding protein
ENSMUSG00000024294	0.0712718	2.48555	-0.560653	Mib1	MIB E3 ubiquitin protein ligase 1
ENSMUSG00000026288	2.18895	2.48232	-0.144141	Inpp5d	inositol polyphosphate-5-phosphatase D
ENSMUSG00000030738	1.59041	2.47978	-0.733675	Eif3c	eukaryotic translation initiation factor 3, subunit C
ENSMUSG00000043252	-1.57168	2.47512	-2.16877	Tmem64	transmembrane protein 64
ENSMUSG00000028560	0.81806	2.47004	-0.0938137	Usp1	ubiquitin specific peptidase 1
ENSMUSG00000040809	0	2.46402	-0.744402	Chil3	chitinase-like 3
ENSMUSG00000067365	0.076343	2.46154	0.292667	Tmem128	transmembrane protein 128
ENSMUSG00000039021	1.25747	2.45326	1.14801	Ttc16	tetratricopeptide repeat domain 16
ENSMUSG00000030287	0.842669	2.4439	-0.425152	Itpr2	inositol 1,4,5-triphosphate receptor 2
ENSMUSG00000026395	-1.19129	2.43849	-1.87316	Ptprc	protein tyrosine phosphatase receptor type C
ENSMUSG00000087370	-0.275634	2.43846	-1.20315	Tmem170b	transmembrane protein 170B
ENSMUSG00000097479	1.05149	2.43824	0.365143	No assciated gene
ENSMUSG00000025922	0.674596	2.42645	0.0342402	Rpl7-ps8	ribosomal protein L7, pseudogene 8
ENSMUSG00000025355	1.23383	2.42571	-1.74078	Mmp19	matrix metallopeptidase 19
ENSMUSG00000049409	-0.0113534	2.41313	0.0151963	Prokr1	prokineticin receptor 1
ENSMUSG00000020923	1.34066	2.41138	0.632448	Ubtf	upstream binding transcription factor, RNA polymerase I
ENSMUSG00000035569	0.522632	2.41075	-2.14898	Ankrd11	ankyrin repeat domain 11
ENSMUSG00000035547	-0.65374	2.40905	-0.257081	Capn5	calpain 5
ENSMUSG00000052013	-0.160665	2.40428	-1.83827	Btla	B and T lymphocyte associated
ENSMUSG00000024603	0.0225921	2.40421	-0.00567378	Dctn4	dynactin 4
ENSMUSG00000024338	-0.401149	2.38756	1.07684	Psmb8	proteasome (prosome, macropain) subunit, beta type 8 (large multifunctional peptidase 7)
ENSMUSG00000028211	-1.00378	2.38667	-0.213389	Trp53inp1	transformation related protein 53 inducible nuclear protein 1
ENSMUSG00000019978	-0.0835661	2.38295	-0.114539	Epb41l2	erythrocyte membrane protein band 4.1 like 2
ENSMUSG00000095186	-0.113495	2.38121	-0.790326	Gm10718	predicted gene 10718
ENSMUSG00000031207	0.47613	2.37276	-0.309314	Msn	moesin
ENSMUSG00000051428	-0.163972	2.35868	1.08679	No assciated gene
ENSMUSG00000097589	0.380389	2.35671	0.414404	Dleu2	deleted in lymphocytic leukemia, 2
ENSMUSG00000064368	1.38523	2.35214	-0.345124	mt-Nd6	mitochondrially encoded NADH dehydrogenase 6
ENSMUSG00000062083	1.00807	2.34943	-0.625232	Rpl13a-ps1	ribosomal protein 13A, pseudogene 1
ENSMUSG00000032412	-0.67326	2.34857	-0.762188	Atp1b3	ATPase, Na+/K+ transporting, beta 3 polypeptide
ENSMUSG00000096979	1.36791	2.34776	-1.24468	No assciated gene
ENSMUSG00000038708	-0.946465	2.34442	0.177802	Golga4	golgin A4
ENSMUSG00000028330	-0.508608	2.34422	-0.75418	Ncbp1	nuclear cap binding protein subunit 1
ENSMUSG00000026771	1.2843	2.34362	0.0846655	Spopl	speckle-type BTB/POZ protein-like
ENSMUSG00000054808	0.284365	2.33434	-0.471392	Actn4	actinin alpha 4
ENSMUSG00000017299	-0.121848	2.32291	-0.173614	Dnttip1	deoxynucleotidyltransferase, terminal, interacting protein 1
ENSMUSG00000038095	-0.883082	2.31401	-1.81981	Sbno1	strawberry notch 1
ENSMUSG00000002058	-0.526018	2.313	0.787338	Unc119	unc-119 lipid binding chaperone
ENSMUSG00000069682	0.620509	2.31148	-0.573815	Gm10275	predicted pseudogene 10275
ENSMUSG00000019769	-0.852425	2.30399	-0.944959	No assciated gene
ENSMUSG00000002949	-1.0946	2.30034	-1.29138	Timm44	translocase of inner mitochondrial membrane 44
ENSMUSG00000026815	0.392511	2.29991	0.674468	Gfi1b	growth factor independent 1B
ENSMUSG00000020458	-0.268057	2.29862	0.305528	Rtn4	reticulon 4
ENSMUSG00000020846	-0.222382	2.29393	-0.0402704	Rflnb	refilin B
ENSMUSG00000020437	1.97131	2.29128	-1.40539	Myo1g	myosin IG
ENSMUSG00000051510	-0.316661	2.28862	-0.563176	Mafg	v-maf musculoaponeurotic fibrosarcoma oncogene family, protein G (avian)
ENSMUSG00000020423	2.0869	2.28525	0.052279	Btg2	BTG anti-proliferation factor 2
ENSMUSG00000042502	0.168716	2.28467	-1.15184	Cd2bp2	CD2 cytoplasmic tail binding protein 2
ENSMUSG00000038740	0.479625	2.28389	-0.0465485	Mvb12b	multivesicular body subunit 12B
ENSMUSG00000046805	0.437518	2.28315	-1.5725	Mpeg1	macrophage expressed gene 1
ENSMUSG00000038059	0.398954	2.26993	0.635301	Smim3	small integral membrane protein 3
ENSMUSG00000039100	0.308706	2.26904	-0.275826	Marchf6	membrane associated ring-CH-type finger 6
ENSMUSG00000039230	0.289119	2.26788	-1.7848	Tbcd	tubulin-specific chaperone d
ENSMUSG00000047767	0.827957	2.2667	0.173786	Atg16l2	autophagy related 16-like 2 (S. cerevisiae)
ENSMUSG00000070667	-0.747527	2.25868	0.490816	Rpl31-ps10	ribosomal protein L31, pseudogene 10
ENSMUSG00000082260	1.37838	2.25294	-1.70891	Gm7429	predicted pseudogene 7429
ENSMUSG00000058600	0.431833	2.25257	-1.05641	Rpl30	ribosomal protein L30
ENSMUSG00000021000	-0.593998	2.24952	-0.923985	Mia2	MIA SH3 domain ER export factor 2
ENSMUSG00000021754	-0.426128	2.24772	-0.0485195	Map3k1	mitogen-activated protein kinase kinase kinase 1
ENSMUSG00000029705	1.7507	2.24588	-0.00492624	Cux1	cut-like homeobox 1
ENSMUSG00000078153	0.390258	2.2422	0.570201	Psme2b	protease (prosome, macropain) activator subunit 2B
ENSMUSG00000053119	-0.817762	2.23949	1.16479	Chmp3	charged multivesicular body protein 3
ENSMUSG00000022295	1.52074	2.23227	-0.252865	Atp6v1c1	ATPase, H+ transporting, lysosomal V1 subunit C1
ENSMUSG00000070738	0.682968	2.23226	0.828548	Dgkd	diacylglycerol kinase, delta
ENSMUSG00000055148	1.81957	2.22811	-1.60693	Klf2	Kruppel-like transcription factor 2 (lung)
ENSMUSG00000005354	0.390258	2.22061	0.0316368	Txn2	thioredoxin 2
ENSMUSG00000030095	-1.10459	2.22022	-0.659266	Tmem43	transmembrane protein 43
ENSMUSG00000083411	0.89167	2.21361	-1.05991	Rpl30-ps10	ribosomal protein L30, pseudogene 10
ENSMUSG00000022000	-0.0558159	2.20669	-0.0306367	Zc3h13	zinc finger CCCH type containing 13
ENSMUSG00000039158	-0.6369	2.20635	-0.69519	Akna	AT-hook transcription factor
ENSMUSG00000044734	-0.586803	2.20511	-0.712672	Serpinb1a	serine (or cysteine) peptidase inhibitor, clade B, member 1a
ENSMUSG00000086453	0	2.20146	-0.746091	Gm11457	predicted gene 11457
ENSMUSG00000018974	1.13144	2.19819	0.0329604	Sart3	squamous cell carcinoma antigen recognized by T cells 3
ENSMUSG00000078853	0.949018	2.19217	0.317334	Igtp	interferon gamma induced GTPase
ENSMUSG00000049494	-0.900406	2.18235	-0.083111	No assciated gene
ENSMUSG00000085342	0.164549	2.18037	1.07769	Gm12254	predicted gene 12254
ENSMUSG00000022844	1.1776	2.17969	-0.335979	Pdia5	protein disulfide isomerase associated 5
ENSMUSG00000083061	1.02444	2.17728	-1.0373	Gm12191	predicted gene 12191
ENSMUSG00000043510	-0.0334117	2.17537	0.35459	Hscb	HscB iron-sulfur cluster co-chaperone
ENSMUSG00000079036	0.584278	2.16932	-0.619587	Alkbh1	alkB homolog 1, histone H2A dioxygenase
ENSMUSG00000024975	0	2.16696	-0.410435	Pdcd4	programmed cell death 4
ENSMUSG00000032640	0.168716	2.16132	-0.265331	Chsy1	chondroitin sulfate synthase 1
ENSMUSG00000085791	0.885726	2.15818	-1.05171	Rpl30-ps9	ribosomal protein L30, pseudogene 9
ENSMUSG00000027365	2.0346	2.15643	-1.14544	Trpm7	transient receptor potential cation channel, subfamily M, member 7
ENSMUSG00000034621	1.08036	2.15625	-1.0038	Gpatch8	G patch domain containing 8
ENSMUSG00000041650	-0.900406	2.15564	0.37463	Pcca	propionyl-Coenzyme A carboxylase, alpha polypeptide
ENSMUSG00000044477	0.0948625	2.15347	0.0132249	Zfand3	zinc finger, AN1-type domain 3
ENSMUSG00000097767	1.24475	2.15126	0.306336	Miat	myocardial infarction associated transcript (non-protein coding)
ENSMUSG00000027495	-0.505674	2.14764	-0.394487	Fam210b	family with sequence similarity 210, member B
ENSMUSG00000029535	-0.394285	2.14226	1.23881	Triap1	TP53 regulated inhibitor of apoptosis 1
ENSMUSG00000020309	1.7677	2.13966	0.578087	Chac2	ChaC, cation transport regulator 2
ENSMUSG00000091498	-0.473591	2.13939	-0.447169	Mpc1-ps	mitochondrial pyruvate carrier 1, pseudogene
ENSMUSG00000080848	0.557083	2.13903	1.64131	Gm9385	predicted pseudogene 9385
ENSMUSG00000040006	0.256625	2.13713	0.440593	Ginm1	glycoprotein integral membrane 1
ENSMUSG00000029397	-0.322075	2.1368	-0.567301	Rchy1	ring finger and CHY zinc finger domain containing 1
ENSMUSG00000021113	-0.0654605	2.13419	-0.221154	Snapc1	small nuclear RNA activating complex, polypeptide 1
ENSMUSG00000029407	1.06999	2.12979	-0.853668	Uso1	USO1 vesicle docking factor
ENSMUSG00000032204	1.44999	2.12906	-0.850032	Aqp9	aquaporin 9
ENSMUSG00000015668	0.544115	2.12367	-0.169176	Pdzd11	PDZ domain containing 11
ENSMUSG00000066315	-1.35095	2.12282	-1.85489	Gm12918	predicted gene 12918
ENSMUSG00000041720	-1.06663	2.12234	-1.50724	Pi4ka	phosphatidylinositol 4-kinase alpha
ENSMUSG00000029647	0.28739	2.12068	-0.79569	Pan3	PAN3 poly(A) specific ribonuclease subunit
ENSMUSG00000018927	0.0709661	2.12059	-0.485122	Ccl6	chemokine (C-C motif) ligand 6
ENSMUSG00000028035	0.710573	2.12021	-0.649858	Dnajb4	DnaJ heat shock protein family (Hsp40) member B4
ENSMUSG00000082165	-0.077277	2.11821	-0.0897876	Gm7091	predicted gene 7091
ENSMUSG00000051223	-0.53429	2.11211	-0.171474	Bzw1	basic leucine zipper and W2 domains 1
ENSMUSG00000090460	-0.891971	2.11208	-0.72971	Gm17511	predicted gene, 17511
ENSMUSG00000089958	0.957763	2.11182	-0.799893	Gm16165	predicted gene 16165
ENSMUSG00000036372	-0.146355	2.10706	0.00304018	Tmem258	transmembrane protein 258
ENSMUSG00000045969	-0.0387697	2.10692	0.148323	Ing1	inhibitor of growth family, member 1
ENSMUSG00000034021	0.74118	2.10685	0.358873	Pds5b	PDS5 cohesin associated factor B
ENSMUSG00000025889	0.120889	2.10646	0.738312	Snca	synuclein, alpha
ENSMUSG00000021024	-0.0420215	2.10117	-0.820892	Psma6	proteasome subunit alpha 6
ENSMUSG00000025862	-1.12641	2.09068	-1.15439	Stag2	stromal antigen 2
ENSMUSG00000021794	-1.12683	2.08992	0.788118	Glud1	glutamate dehydrogenase 1
ENSMUSG00000039382	1.90812	2.08507	-0.588214	Wdr45	WD repeat domain 45
ENSMUSG00000056076	1.2121	2.08419	-0.426045	Eif3b	eukaryotic translation initiation factor 3, subunit B
ENSMUSG00000096385	-0.258867	2.08039	0.261647	Gm11168	predicted gene 11168
ENSMUSG00000060216	-0.178897	2.07841	-0.820308	Arrb2	arrestin, beta 2
ENSMUSG00000022836	1.86501	2.07622	-1.37381	Mylk	myosin, light polypeptide kinase
ENSMUSG00000054083	-0.365457	2.07609	-0.994152	Capn12	calpain 12
ENSMUSG00000059248	0.661436	2.0745	0.6837	Septin9	septin 9
ENSMUSG00000018567	1.18767	2.07262	1.4511	Gabarap	gamma-aminobutyric acid receptor associated protein
ENSMUSG00000005034	1.62742	2.07206	1.61507	Prkacb	protein kinase, cAMP dependent, catalytic, beta
ENSMUSG00000058174	0.638348	2.07133	-0.629298	Gm5148	predicted gene 5148
ENSMUSG00000054405	-0.355652	2.06401	0.337817	Dnajc8	DnaJ heat shock protein family (Hsp40) member C8
ENSMUSG00000094344	-1.38624	2.06226	-1.46465	Gm11942	predicted gene 11942
ENSMUSG00000018661	-1.676	2.05755	-1.12569	Cog1	component of oligomeric golgi complex 1
ENSMUSG00000057531	-1.05362	2.05581	0.105309	Dtnbp1	dystrobrevin binding protein 1
ENSMUSG00000040423	0.0857576	2.05481	1.55298	Rc3h1	RING CCCH (C3H) domains 1
ENSMUSG00000074151	0.178126	2.04952	-1.17451	Nlrc5	NLR family, CARD domain containing 5
ENSMUSG00000021192	0.123888	2.04656	-0.289448	Golga5	golgin A5
ENSMUSG00000023861	-1.27857	2.04556	-0.482635	Mpc1	mitochondrial pyruvate carrier 1
ENSMUSG00000033960	-1.00866	2.0428	0.625886	Jcad	junctional cadherin 5 associated
ENSMUSG00000022200	0.46233	2.04168	-0.450235	Golph3	golgi phosphoprotein 3
ENSMUSG00000041625	-0.122511	2.04093	-0.240381	Ggact	gamma-glutamylamine cyclotransferase
ENSMUSG00000086420	-0.860724	2.0401	-0.790661	Gm8865	predicted gene 8865
ENSMUSG00000033184	-1.52329	2.03497	-0.204459	Tmed7	transmembrane p24 trafficking protein 7
ENSMUSG00000067870	-0.939955	2.0316	-0.374095	Rpl31-ps8	ribosomal protein L31, pseudogene 8
ENSMUSG00000020075	0.168716	2.02903	0.954664	Ddx21	DExD box helicase 21
ENSMUSG00000027742	0.74118	2.02338	-0.73443	Cog6	component of oligomeric golgi complex 6
ENSMUSG00000024974	-0.0283494	2.02274	0.170207	Smc3	structural maintenance of chromosomes 3
ENSMUSG00000020917	-0.130222	2.02156	-1.06646	Acly	ATP citrate lyase
ENSMUSG00000094685	0.675719	2.02101	0.0325986	Gm5900	predicted pseudogene 5900
ENSMUSG00000060377	-1.40082	2.01892	-1.17295	Rpl36a-ps1	ribosomal protein L36A, pseudogene 1
ENSMUSG00000024581	-0.399594	2.01787	-1.20271	Napg	N-ethylmaleimide sensitive fusion protein attachment protein gamma
ENSMUSG00000052146	-1.32908	2.01731	-1.16725	Rps10	ribosomal protein S10
ENSMUSG00000004268	0.168716	2.01563	0.129144	Emg1	EMG1 N1-specific pseudouridine methyltransferase
ENSMUSG00000095847	1.18576	2.01426	-0.403652	Gm5451	predicted gene 5451
ENSMUSG00000036533	0.397088	2.01121	1.0095	Cdc42ep3	CDC42 effector protein (Rho GTPase binding) 3
ENSMUSG00000060935	0.120403	2.01085	-0.821187	Tmem263	transmembrane protein 263
ENSMUSG00000061130	-1.18386	2.0085	-0.494617	Ppm1b	protein phosphatase 1B, magnesium dependent, beta isoform
ENSMUSG00000036054	1.77844	2.00661	-1.33566	Sugp2	SURP and G patch domain containing 2
ENSMUSG00000041133	1.33502	2.00552	-0.190833	Smc1a	structural maintenance of chromosomes 1A
ENSMUSG00000070315	-0.0495598	2.0049	-1.57546	4930581F22Rik	RIKEN cDNA 4930581F22 gene
ENSMUSG00000083320	0.0233277	2.00191	-1.56627	Gm13935	predicted gene 13935
ENSMUSG00000020372	1.23365	1.9927	-0.327516	Rack1	receptor for activated C kinase 1
ENSMUSG00000024414	0.642021	1.98944	-0.187187	Mrpl27	mitochondrial ribosomal protein L27
ENSMUSG00000056904	-0.741677	1.98937	-0.69451	Gm5620	predicted gene 5620
ENSMUSG00000018322	0	1.98893	-0.252259	Tomm34	translocase of outer mitochondrial membrane 34
ENSMUSG00000020451	0.536246	1.98788	-0.0904077	Limk2	LIM domain kinase 2
ENSMUSG00000031885	-0.0283494	1.98678	-0.795338	Cbfb	core binding factor beta
ENSMUSG00000030483	0.514354	1.98594	-0.885751	Cyp2b10	cytochrome P450, family 2, subfamily b, polypeptide 10
ENSMUSG00000067194	1.57277	1.98457	-0.133223	Eif1ax	eukaryotic translation initiation factor 1A, X-linked
ENSMUSG00000082419	0.3364	1.98394	-0.467487	Gm11425	predicted gene 11425
ENSMUSG00000021374	-0.494484	1.98235	-0.636942	Nup153	nucleoporin 153
ENSMUSG00000068566	1.40209	1.98069	-0.885709	Myadm	myeloid-associated differentiation marker
ENSMUSG00000026238	0.0388556	1.9785	1.43532	Ptma	prothymosin alpha
ENSMUSG00000026721	-1.14116	1.97563	0.50776	Rabgap1l	RAB GTPase activating protein 1-like
ENSMUSG00000063328	0.168716	1.9749	-0.335682	Gm9396	predicted gene 9396
ENSMUSG00000026728	0.0487094	1.97336	0.264477	Vim	vimentin
ENSMUSG00000047090	1.23081	1.97147	-1.31894	Tmem198b	transmembrane protein 198b
ENSMUSG00000030341	-1.00369	1.96975	-0.549128	Tnfrsf1a	tumor necrosis factor receptor superfamily, member 1a
ENSMUSG00000025085	0.630727	1.96967	1.55114	Ablim1	actin-binding LIM protein 1
ENSMUSG00000030089	-1.11675	1.96784	-0.153397	Slc41a3	solute carrier family 41, member 3
ENSMUSG00000020225	1.57342	1.96451	0.205159	Tmbim4	transmembrane BAX inhibitor motif containing 4
ENSMUSG00000096319	0.737809	1.96364	0.521461	No assciated gene
ENSMUSG00000087017	-1.09397	1.95793	-0.159132	4930417H01Rik	RIKEN cDNA 4930417H01 gene
ENSMUSG00000091831	0.159049	1.95311	-1.46775	Gm4707	predicted gene 4707
ENSMUSG00000026977	-0.891991	1.9527	1.31318	Marchf7	membrane associated ring-CH-type finger 7
ENSMUSG00000072255	-0.366827	1.9494	-0.0344501	Rpl31-ps17	ribosomal protein L31, pseudogene 17
ENSMUSG00000026932	-0.93931	1.94932	-0.77921	Nacc2	nucleus accumbens associated 2, BEN and BTB (POZ) domain containing
ENSMUSG00000029234	0	1.94622	0.219552	Tmem165	transmembrane protein 165
ENSMUSG00000031167	0.120403	1.94578	0.253327	Rbm3	RNA binding motif (RNP1, RRM) protein 3
ENSMUSG00000027692	-1.49899	1.94529	-1.59574	Tnik	TRAF2 and NCK interacting kinase
ENSMUSG00000083840	1.59316	1.94523	0.928389	No assciated gene
ENSMUSG00000097554	1.59316	1.94523	0.928389	No assciated gene
ENSMUSG00000067147	0.737809	1.93679	0.623131	Rpl7a-ps11	ribosomal protein L7A, pseudogene 11
ENSMUSG00000049313	0.199493	1.93612	-1.07963	Sorl1	sortilin-related receptor, LDLR class A repeats-containing
ENSMUSG00000079197	0.168716	1.92982	-0.265907	Psme2	proteasome (prosome, macropain) activator subunit 2 (PA28 beta)
ENSMUSG00000021728	0.0864882	1.92901	-0.246323	Emb	embigin
ENSMUSG00000062582	0.628201	1.9286	-1.01021	Rpl30-ps8	ribosomal protein L30, pseudogene 8
ENSMUSG00000081159	0	1.92436	-0.896079	Gm6023	predicted gene 6023
ENSMUSG00000079889	-0.620885	1.92096	-0.187423	Gm11951	predicted gene 11951
ENSMUSG00000022437	0.675719	1.91904	-0.783133	Samm50	SAMM50 sorting and assembly machinery component
ENSMUSG00000045795	0.414507	1.91491	0.514244	Whamm	WAS protein homolog associated with actin, golgi membranes and microtubules
ENSMUSG00000057696	0.590427	1.91353	-1.04358	Rpl30-ps1	ribosomal protein L30, pseudogene 1
ENSMUSG00000034333	0.168716	1.91338	0.75086	Zbed4	zinc finger, BED type containing 4
ENSMUSG00000097365	1.28092	1.91187	0.526569	C030034L19Rik	RIKEN cDNA C030034L19 gene
ENSMUSG00000071671	1.11348	1.91184	-1.03997	Gm10343	predicted gene 10343
ENSMUSG00000029298	1.0596	1.90798	0.384166	Gbp9	guanylate-binding protein 9
ENSMUSG00000028484	0.572219	1.90774	0.598955	Psip1	PC4 and SFRS1 interacting protein 1
ENSMUSG00000056770	-0.289011	1.90771	-0.1358	Setd3	SET domain containing 3
ENSMUSG00000056758	0.199251	1.90722	-0.936952	Hmga2	high mobility group AT-hook 2
ENSMUSG00000095846	-0.13087	1.90456	0.180878	No assciated gene
ENSMUSG00000053293	0.428107	1.90281	0.343805	Pom121	nuclear pore membrane protein 121
ENSMUSG00000006373	-0.54464	1.90096	0.949266	Pgrmc1	progesterone receptor membrane component 1
ENSMUSG00000020644	0.165396	1.90025	-0.0940608	Id2	inhibitor of DNA binding 2
ENSMUSG00000024622	0.675719	1.89963	0.507523	Hmgxb3	HMG box domain containing 3
ENSMUSG00000038866	-1.04007	1.8898	-0.178621	Zcchc2	zinc finger, CCHC domain containing 2
ENSMUSG00000026104	0.762666	1.88932	0.0902749	Stat1	signal transducer and activator of transcription 1
ENSMUSG00000071141	3.89e-05	1.88787	-1.29101	Rpl36a-ps3	ribosomal protein L36A, pseudogene 3
ENSMUSG00000034998	0	1.88649	-1.59985	Foxn2	forkhead box N2
ENSMUSG00000087478	-1.21571	1.88574	-0.82699	4930506C21Rik	RIKEN cDNA 4930506C21 gene
ENSMUSG00000083326	-1.18506	1.88508	0.320818	Rpl38-ps1	ribosomal protein L38, pseudogene 1
ENSMUSG00000031198	-0.897365	1.88339	-0.423274	Fundc2	FUN14 domain containing 2
ENSMUSG00000052752	1.5316	1.88229	-1.43217	Traf7	TNF receptor-associated factor 7
ENSMUSG00000059474	1.34471	1.88189	-0.482857	Mbtd1	mbt domain containing 1
ENSMUSG00000062518	0	1.87992	0.312444	Zfp534	zinc finger protein 534
ENSMUSG00000029385	-1.373	1.87735	0.370836	Ccng2	cyclin G2
ENSMUSG00000031068	0.46715	1.87103	0.391582	Glrx3	glutaredoxin 3
ENSMUSG00000044148	0.168716	1.87073	-0.309732	1810030O07Rik	RIKEN cDNA 1810030O07 gene
ENSMUSG00000024095	-0.170446	1.86671	-0.530926	Hnrnpll	heterogeneous nuclear ribonucleoprotein L-like
ENSMUSG00000037270	1.48643	1.85818	-0.535273	Bltp1	bridge-like lipid transfer protein family member 1
ENSMUSG00000068036	-0.900406	1.8576	0.396323	Afdn	afadin, adherens junction formation factor
ENSMUSG00000027951	-0.291893	1.85645	-0.0740102	Adar	adenosine deaminase, RNA-specific
ENSMUSG00000084159	0.120403	1.84943	0.370161	Gm12696	predicted gene 12696
ENSMUSG00000035247	-0.851417	1.84918	-0.185799	Hectd1	HECT domain E3 ubiquitin protein ligase 1
ENSMUSG00000034566	-0.431241	1.84891	0.25375	Atp5h	ATP synthase, H+ transporting, mitochondrial F0 complex, subunit D
ENSMUSG00000027082	-0.234176	1.84853	-0.169502	Tfpi	tissue factor pathway inhibitor
ENSMUSG00000028005	0.096986	1.8481	-0.596738	Gucy1b1	guanylate cyclase 1, soluble, beta 1
ENSMUSG00000021488	0	1.84668	-0.917205	Nsd1	nuclear receptor-binding SET-domain protein 1
ENSMUSG00000046311	0	1.84413	-0.285712	Zfp62	zinc finger protein 62
ENSMUSG00000037572	-0.66398	1.83829	0.596681	Wdhd1	WD repeat and HMG-box DNA binding protein 1
ENSMUSG00000036478	1.6759	1.83793	-1.23862	Btg1	BTG anti-proliferation factor 1
ENSMUSG00000063875	-0.459675	1.8374	0.145922	Rps6-ps1	ribosomal protein S6, pseudogene 1
ENSMUSG00000021484	0.877417	1.83654	1.41817	Lman2	lectin, mannose-binding 2
ENSMUSG00000060209	0.303762	1.83653	-0.804322	No assciated gene
ENSMUSG00000074479	0.260106	1.83455	-0.538141	Rtraf-ps	RNA transcription, translation and transport factor, pseudogene
ENSMUSG00000035311	0	1.83312	0.17557	Gnptab	N-acetylglucosamine-1-phosphate transferase, alpha and beta subunits
ENSMUSG00000022607	1.37091	1.83242	0.997578	Ptk2	PTK2 protein tyrosine kinase 2
ENSMUSG00000031299	0.358724	1.83082	-0.0383046	Pdha1	pyruvate dehydrogenase E1 alpha 1
ENSMUSG00000074657	-1.18644	1.82889	0.0901156	Kif5a	kinesin family member 5A
ENSMUSG00000073702	-0.143137	1.82768	-0.334256	Rpl31	ribosomal protein L31
ENSMUSG00000058492	0.502924	1.82692	0.41159	Scp2-ps2	sterol carrier protein 2, pseudogene 2
ENSMUSG00000036169	-0.395586	1.82272	-0.298366	Sostdc1	sclerostin domain containing 1
ENSMUSG00000040479	1.37116	1.82048	-0.786233	Dgkz	diacylglycerol kinase zeta
ENSMUSG00000043505	0.504701	1.8177	0.58451	Gimap5	GTPase, IMAP family member 5
ENSMUSG00000022824	1.32232	1.80976	-0.520537	Muc13	mucin 13, epithelial transmembrane
ENSMUSG00000076031	-0.498795	1.80935	-1.19766	No assciated gene
ENSMUSG00000044377	0.708349	1.80275	-0.0649296	Gm13080	predicted gene 13080
ENSMUSG00000022817	-0.211881	1.80178	-0.278818	Itgb5	integrin beta 5
ENSMUSG00000042082	1.37783	1.79498	0.200148	Arsb	arylsulfatase B
ENSMUSG00000082118	-0.591509	1.79433	0.410486	Gm13862	predicted gene 13862
ENSMUSG00000027852	-0.99668	1.7848	0.273045	Nras	neuroblastoma ras oncogene
ENSMUSG00000092014	-0.621103	1.78462	1.21293	Gm4468	predicted gene 4468
ENSMUSG00000016308	-0.44908	1.78435	-0.500502	Ube2a	ubiquitin-conjugating enzyme E2A
ENSMUSG00000006673	1.15204	1.78192	0.275876	Qrich1	glutamine-rich 1
ENSMUSG00000015355	0.748127	1.78109	-0.489834	Cd48	CD48 antigen
ENSMUSG00000020315	-0.218887	1.77824	0.631499	Sptbn1	spectrin beta, non-erythrocytic 1
ENSMUSG00000093798	1.32206	1.77695	0.0945666	Gm8355	predicted pseudogene 8355
ENSMUSG00000029156	0.0698234	1.77679	0.89318	Sgcb	sarcoglycan, beta (dystrophin-associated glycoprotein)
ENSMUSG00000093844	-0.0164476	1.77399	0.180878	No assciated gene
ENSMUSG00000024277	-0.491734	1.77302	-0.228633	Mapre2	microtubule-associated protein, RP/EB family, member 2
ENSMUSG00000059708	0.74118	1.77215	-0.516085	Akap17b	A kinase (PRKA) anchor protein 17B
ENSMUSG00000025809	0.101196	1.77203	0.581592	Itgb1	integrin beta 1 (fibronectin receptor beta)
ENSMUSG00000001655	1.2121	1.77042	-0.395741	Hoxc13	homeobox C13
ENSMUSG00000021871	1.06517	1.76913	-0.302821	Gm49342	predicted gene, 49342
ENSMUSG00000029094	0	1.76873	0.0981947	Afap1	actin filament associated protein 1
ENSMUSG00000090468	-0.875713	1.76693	-0.672178	Gm2840	predicted gene 2840
ENSMUSG00000003848	0	1.76551	0.130234	Nob1	NIN1/RPN12 binding protein 1 homolog
ENSMUSG00000022443	0.240281	1.76536	0.0330047	Myh9	myosin, heavy polypeptide 9, non-muscle
ENSMUSG00000024006	-0.982708	1.76415	-0.926343	Stk38	serine/threonine kinase 38
ENSMUSG00000018378	1.23018	1.76244	0.203272	Cuedc1	CUE domain containing 1
ENSMUSG00000007379	1.32909	1.7528	-1.2453	Dennd2c	DENN domain containing 2C
ENSMUSG00000092550	-1.12752	1.75002	-0.0752552	Gm20496	predicted gene 20496
ENSMUSG00000040713	-0.120589	1.7433	0.252286	Creg1	cellular repressor of E1A-stimulated genes 1
ENSMUSG00000015961	0	1.74217	1.10917	Adss	adenylosuccinate synthetase, non muscle
ENSMUSG00000039899	-0.343117	1.73785	1.14054	Fgl2	fibrinogen-like protein 2
ENSMUSG00000037443	0.915589	1.73707	-1.21076	Cep85	centrosomal protein 85
ENSMUSG00000044647	-0.361717	1.73598	-1.1731	Csrnp3	cysteine-serine-rich nuclear protein 3
ENSMUSG00000098217	-0.197065	1.73537	-0.123638	Gm27046	predicted gene, 27046
ENSMUSG00000033597	0.531951	1.73462	-1.15664	Caskin1	CASK interacting protein 1
ENSMUSG00000034751	0.0205225	1.73431	0.919714	Mast4	microtubule associated serine/threonine kinase family member 4
ENSMUSG00000044424	-1.09294	1.72794	-0.203548	Gm9493	predicted gene 9493
ENSMUSG00000038848	0.509283	1.72662	-1.12275	Ythdf1	YTH N6-methyladenosine RNA binding protein 1
ENSMUSG00000090086	0.569578	1.72658	0.460306	AI480526	expressed sequence AI480526
ENSMUSG00000024370	0	1.7253	0.41051	Cdc23	CDC23 cell division cycle 23
ENSMUSG00000040061	0.902271	1.72491	-1.52954	Plcb2	phospholipase C, beta 2
ENSMUSG00000049751	-0.264422	1.72414	-1.16577	Rpl36al	ribosomal protein L36A-like
ENSMUSG00000066389	0.902271	1.72258	-0.367685	Rpl31-ps1	ribosomal protein L31, pseudogene 1
ENSMUSG00000095547	-0.40384	1.7219	0.457579	Gm10719	predicted gene 10719
ENSMUSG00000051855	0.0149772	1.7204	-0.0543391	Mest	mesoderm specific transcript
ENSMUSG00000097089	-0.361717	1.71955	0.80402	Gm26879	predicted gene, 26879
ENSMUSG00000032035	-0.122041	1.71899	-0.240373	Ets1	E26 avian leukemia oncogene 1, 5' domain
ENSMUSG00000044167	1.23046	1.7188	0.339053	Foxo1	forkhead box O1
ENSMUSG00000056267	1.51513	1.71602	0.117341	Cep70	centrosomal protein 70
ENSMUSG00000082786	-0.827079	1.7118	0.402322	Gm14489	predicted gene 14489
ENSMUSG00000038642	0.70719	1.71117	-0.708191	Ctss	cathepsin S
ENSMUSG00000047641	0.335985	1.70804	-0.123638	Krt87	keratin 87
ENSMUSG00000022708	0.156082	1.70787	0.255462	Zbtb20	zinc finger and BTB domain containing 20
ENSMUSG00000032557	1.04917	1.70642	0.48756	Uba5	ubiquitin-like modifier activating enzyme 5
ENSMUSG00000034796	0.352525	1.70103	1.20005	Cpne7	copine VII
ENSMUSG00000079418	0.419592	1.69976	1.12095	Atg4a	autophagy related 4A, cysteine peptidase
ENSMUSG00000063952	0.168716	1.69653	0.909133	Brpf3	bromodomain and PHD finger containing, 3
ENSMUSG00000051451	-0.950031	1.69262	-1.10407	Crebzf	CREB/ATF bZIP transcription factor
ENSMUSG00000090213	1.41971	1.6892	-0.589923	Peds1	plasmanylethanolamine desaturase 1
ENSMUSG00000038205	-0.295235	1.68816	0.704212	Prkab2	protein kinase, AMP-activated, beta 2 non-catalytic subunit
ENSMUSG00000003779	-0.197065	1.68511	0.771447	Kif20a	kinesin family member 20A
ENSMUSG00000025026	-0.0507308	1.68181	0.081538	Add3	adducin 3 (gamma)
ENSMUSG00000017119	0.120403	1.677	1.07156	Nbr1	NBR1, autophagy cargo receptor
ENSMUSG00000037410	-0.910531	1.6768	0.468005	Tbc1d2b	TBC1 domain family, member 2B
ENSMUSG00000022797	0.107662	1.67563	0.305021	Tfrc	transferrin receptor
ENSMUSG00000028420	0	1.67366	0.0204696	Tmem38b	transmembrane protein 38B
ENSMUSG00000032667	1.2275	1.67305	-0.0290456	Pon2	paraoxonase 2
ENSMUSG00000032338	0	1.6709	0.263158	Hcn4	hyperpolarization-activated, cyclic nucleotide-gated K+ 4
ENSMUSG00000081281	0.266889	1.67018	0.35821	Rpl7-ps9	ribosomal protein L7, pseudogene 9
ENSMUSG00000030104	-0.849342	1.67001	0.281107	Edem1	ER degradation enhancer, mannosidase alpha-like 1
ENSMUSG00000042572	-1.04153	1.66705	-0.780048	Ube2q1	ubiquitin-conjugating enzyme E2Q family member 1
ENSMUSG00000037563	-0.812025	1.66582	-0.410348	Rps16	ribosomal protein S16
ENSMUSG00000085116	0.0112454	1.66492	0.467868	Gm2735	predicted gene 2735
ENSMUSG00000036712	-0.729561	1.66221	-0.890007	Cyld	CYLD lysine 63 deubiquitinase
ENSMUSG00000062127	0	1.65877	-0.127467	Cttnbp2nl	CTTNBP2 N-terminal like
ENSMUSG00000018654	-1.07352	1.6571	0.50633	Ikzf1	IKAROS family zinc finger 1
ENSMUSG00000036986	0.189462	1.65646	-0.596478	Pml	promyelocytic leukemia
ENSMUSG00000034484	-1.08888	1.65405	-0.134897	Snx2	sorting nexin 2
ENSMUSG00000028898	1.23826	1.65233	-0.323668	Trnau1ap	tRNA selenocysteine 1 associated protein 1
ENSMUSG00000054387	-0.732514	1.64933	-0.596584	Mdm4	transformed mouse 3T3 cell double minute 4
ENSMUSG00000091269	0.168716	1.64866	-0.170236	Gm6682	predicted gene 6682
ENSMUSG00000036285	0	1.64825	-0.936898	Noa1	nitric oxide associated 1
ENSMUSG00000020532	1.24588	1.6477	0.330271	Acaca	acetyl-Coenzyme A carboxylase alpha
ENSMUSG00000037669	-0.0422202	1.64632	0.933169	Ldah	lipid droplet associated hydrolase
ENSMUSG00000016319	0	1.64572	0.464803	Slc25a5	solute carrier family 25 (mitochondrial carrier, adenine nucleotide translocator), member 5
ENSMUSG00000048490	0.908648	1.64457	0.422381	Nrip1	nuclear receptor interacting protein 1
ENSMUSG00000070327	0.306509	1.6414	-0.671	Rnf213	ring finger protein 213
ENSMUSG00000034673	0	1.64082	0.417352	Pbx2	pre B cell leukemia homeobox 2
ENSMUSG00000032570	-1.10054	1.63942	-0.808006	Atp2c1	ATPase, Ca++-sequestering
ENSMUSG00000031714	-0.627792	1.63823	-1.0746	Gab1	growth factor receptor bound protein 2-associated protein 1
ENSMUSG00000089647	0.60437	1.63803	0.319961	Gm2245	predicted gene 2245
ENSMUSG00000017404	1.44322	1.63667	-1.19817	Rpl19	ribosomal protein L19
ENSMUSG00000059811	-0.395586	1.63607	0.950444	Atl2	atlastin GTPase 2
ENSMUSG00000032418	0.654959	1.63547	-0.234606	Me1	malic enzyme 1, NADP(+)-dependent, cytosolic
ENSMUSG00000086583	-0.173626	1.63451	-0.0976909	Gm15500	predicted pseudogene 15500
ENSMUSG00000024867	-0.646239	1.63337	-0.571179	Pip5k1b	phosphatidylinositol-4-phosphate 5-kinase, type 1 beta
ENSMUSG00000038014	-0.0861072	1.63298	-1.48508	Fam120a	family with sequence similarity 120, member A
ENSMUSG00000083658	0	1.63212	-0.123638	No assciated gene
ENSMUSG00000046806	-0.913699	1.63001	0.257754	Cyren	cell cycle regulator of NHEJ
ENSMUSG00000033543	-0.168715	1.62957	0.0592002	Gtf2a2	general transcription factor II A, 2
ENSMUSG00000026872	-0.864073	1.62838	0.214025	Zeb2	zinc finger E-box binding homeobox 2
ENSMUSG00000019295	0	1.62793	0.122428	Tmem129	transmembrane protein 129
ENSMUSG00000039285	-0.479372	1.62692	0.74656	Azi2	5-azacytidine induced gene 2
ENSMUSG00000038900	0.266889	1.626	-0.0654854	Rpl12	ribosomal protein L12
ENSMUSG00000097582	1.37783	1.62388	0.0637316	No assciated gene
ENSMUSG00000059890	0.696088	1.62243	-0.553453	Ube4a	ubiquitination factor E4A
ENSMUSG00000036086	1.55382	1.6216	-1.04836	Zranb3	zinc finger, RAN-binding domain containing 3
ENSMUSG00000015766	1.50944	1.62149	0.0384813	Eps8	epidermal growth factor receptor pathway substrate 8
ENSMUSG00000066902	0.210933	1.62008	-0.340625	Rps23-ps2	ribosomal protein S23, pseudogene 2
ENSMUSG00000065952	-0.152303	1.62008	-0.352868	Rps23rg1	ribosomal protein S23, retrogene 1
ENSMUSG00000079362	-0.842216	1.61998	0.117747	Gm43302	predicted gene 43302
ENSMUSG00000097803	-0.262052	1.6185	-0.143165	Rpl31-ps16	ribosomal protein L31, pseudogene 16
ENSMUSG00000039215	-0.709472	1.61806	0	Aoc1l3	amine oxidase copper containing 1-like 3
ENSMUSG00000036698	0.0810516	1.61605	0.530252	Ago2	argonaute RISC catalytic subunit 2
ENSMUSG00000062758	0.639636	1.61531	0.965937	Gm16477	predicted pseudogene 16477
ENSMUSG00000031585	-0.806961	1.61409	0.710195	Gtf2e2	general transcription factor II E, polypeptide 2 (beta subunit)
ENSMUSG00000085891	0	1.61029	1.11733	Gm14634	predicted gene 14634
ENSMUSG00000054302	0.74118	1.61014	-1.03124	Eapp	E2F-associated phosphoprotein
ENSMUSG00000074731	0.335985	1.60893	0.136521	Zfp345	zinc finger protein 345
ENSMUSG00000028691	1.25222	1.60733	-1.40703	Prdx1	peroxiredoxin 1
ENSMUSG00000028821	0.55083	1.60712	0.49946	Syf2	SYF2 homolog, RNA splicing factor (S. cerevisiae)
ENSMUSG00000080857	0.266889	1.60539	0.403349	Gm12859	predicted gene 12859
ENSMUSG00000057137	-0.913699	1.60495	0.330132	Tmem140	transmembrane protein 140
ENSMUSG00000047735	0.411577	1.60176	-0.809483	Samd9l	sterile alpha motif domain containing 9-like
ENSMUSG00000083192	-0.628241	1.60149	-0.615285	No assciated gene
ENSMUSG00000040795	0.342842	1.59898	-1.02569	Iqcc	IQ motif containing C
ENSMUSG00000046782	1.23867	1.59359	-1.04791	Ttc6	tetratricopeptide repeat domain 6
ENSMUSG00000027665	-0.0975318	1.59247	-0.104423	Pik3ca	phosphatidylinositol-4,5-bisphosphate 3-kinase catalytic subunit alpha
ENSMUSG00000025745	0.151973	1.58704	-1.05194	Hadha	hydroxyacyl-CoA dehydrogenase trifunctional multienzyme complex subunit alpha
ENSMUSG00000026421	-0.707229	1.58501	0.0087123	Csrp1	cysteine and glycine-rich protein 1
ENSMUSG00000096736	0.411077	1.58462	-0.329924	Gm17535	predicted gene, 17535
ENSMUSG00000061330	-0.146519	1.58456	0.103967	Gm6436	predicted gene 6436
ENSMUSG00000025232	-0.966738	1.5843	-0.408242	Hexa	hexosaminidase A
ENSMUSG00000035203	-0.126447	1.58273	0.593852	Epn1	epsin 1
ENSMUSG00000062729	0	1.5772	-0.138063	Ppox	protoporphyrinogen oxidase
ENSMUSG00000094724	-0.259153	1.57584	-0.129742	Rnaset2b	ribonuclease T2B
ENSMUSG00000031303	-0.15169	1.5756	0.216302	Map3k15	mitogen-activated protein kinase kinase kinase 15
ENSMUSG00000058607	0	1.57559	-0.692632	Rpl31-ps20	ribosomal protein L31, pseudogene 20
ENSMUSG00000052298	0.992616	1.56906	0.0378751	Cdc42se2	CDC42 small effector 2
ENSMUSG00000040195	0	1.56749	0.635095	Nemp1	nuclear envelope integral membrane protein 1
ENSMUSG00000024410	-0.796611	1.56423	0.773925	Rmc1	regulator of MON1-CCZ1
ENSMUSG00000026483	0	1.56417	0.00640146	Niban1	niban apoptosis regulator 1
ENSMUSG00000025421	-0.197065	1.56363	-0.131711	Hdhd2	haloacid dehalogenase-like hydrolase domain containing 2
ENSMUSG00000032661	0.168716	1.56358	-0.793379	Oas3	2'-5' oligoadenylate synthetase 3
ENSMUSG00000024083	-0.917963	1.56347	-1.36758	Pja2	praja ring finger ubiquitin ligase 2
ENSMUSG00000054717	0.601237	1.56283	0.136521	Hmgb2	high mobility group box 2
ENSMUSG00000004508	-0.0138215	1.56282	0.164551	Gab2	growth factor receptor bound protein 2-associated protein 2
ENSMUSG00000029775	0.55733	1.56068	0.882146	Klhdc10	kelch domain containing 10
ENSMUSG00000009291	0.839655	1.55895	-0.15021	Pttg1ip	pituitary tumor-transforming 1 interacting protein
ENSMUSG00000037148	1.31505	1.55618	-0.96359	Arhgap10	Rho GTPase activating protein 10
ENSMUSG00000044434	-0.195922	1.55203	-0.67942	Gm9791	predicted pseudogene 9791
ENSMUSG00000084345	1.38403	1.55133	0.335084	Rpl17-ps4	ribosomal protein L17, pseudogene 4
ENSMUSG00000020349	-0.852815	1.54742	0.738673	Ppp2ca	protein phosphatase 2 (formerly 2A), catalytic subunit, alpha isoform
ENSMUSG00000024787	0.804401	1.54635	-1.17036	Snx15	sorting nexin 15
ENSMUSG00000057657	-0.056795	1.54533	-0.472694	Rps18-ps3	ribosomal protein S18, pseudogene 3
ENSMUSG00000004460	0	1.54527	0.26732	Dnajb11	DnaJ heat shock protein family (Hsp40) member B11
ENSMUSG00000022779	0	1.54146	-0.364019	Top3b	topoisomerase (DNA) III beta
ENSMUSG00000056999	1.22587	1.54075	0.516473	Ide	insulin degrading enzyme
ENSMUSG00000028189	1.05635	1.53768	-0.302337	Ctbs	chitobiase
ENSMUSG00000006301	-0.234176	1.53715	0.89007	Tmbim1	transmembrane BAX inhibitor motif containing 1
ENSMUSG00000036792	0.947221	1.53634	0.650215	Mbd5	methyl-CpG binding domain protein 5
ENSMUSG00000040270	-0.652335	1.53394	-1.04587	Bach2	BTB and CNC homology, basic leucine zipper transcription factor 2
ENSMUSG00000052085	1.32702	1.53376	-0.225834	Dock8	dedicator of cytokinesis 8
ENSMUSG00000021224	-0.717541	1.53167	0.728511	Numb	NUMB endocytic adaptor protein
ENSMUSG00000064281	0.139335	1.53085	-0.221627	Rpl19-ps1	ribosomal protein L19, pseudogene 1
ENSMUSG00000095159	1.48774	1.53074	-0.211377	Tubb4b-ps1	tubulin, beta 4B class IVB, pseudogene 1
ENSMUSG00000027270	-0.195922	1.52968	0.831128	Lamp5	lysosomal-associated membrane protein family, member 5
ENSMUSG00000083076	1.12594	1.52868	-1.15449	Gm11408	predicted gene 11408
ENSMUSG00000032434	-1.14558	1.52481	-1.09379	Cmtm6	CKLF-like MARVEL transmembrane domain containing 6
ENSMUSG00000081179	0.42993	1.52395	-0.509104	Gm13136	predicted gene 13136
ENSMUSG00000038690	-0.144357	1.52187	-0.114958	Atp5j2	ATP synthase, H+ transporting, mitochondrial F0 complex, subunit F2
ENSMUSG00000020064	-0.313073	1.52142	0.191193	Herc4	hect domain and RLD 4
ENSMUSG00000040747	0.492894	1.52018	-0.701827	Cd53	CD53 antigen
ENSMUSG00000038342	0.168716	1.51962	0.691151	Mlxip	MLX interacting protein
ENSMUSG00000085077	0.902271	1.51753	-0.0221424	1700049E15Rik	RIKEN cDNA 1700049E15 gene
ENSMUSG00000026496	0.643637	1.51651	-0.0219986	Parp1	poly (ADP-ribose) polymerase family, member 1
ENSMUSG00000062647	0.639636	1.51633	-0.409581	Rpl7a	ribosomal protein L7A
ENSMUSG00000039501	1.30516	1.5144	-0.297704	Znfx1	zinc finger, NFX1-type containing 1
ENSMUSG00000036098	-0.73169	1.51288	-0.0282947	Myrf	myelin regulatory factor
ENSMUSG00000008393	0.263479	1.51286	-0.95697	Carhsp1	calcium regulated heat stable protein 1
ENSMUSG00000078498	0.0787152	1.51187	0.800514	Zfp988	zinc finger protein 988
ENSMUSG00000037331	0.504701	1.51111	-0.771436	Larp1	La ribonucleoprotein 1, translational regulator
ENSMUSG00000020069	-0.900406	1.50865	0.624806	Hnrnph3	heterogeneous nuclear ribonucleoprotein H3
ENSMUSG00000037395	-0.348564	1.50745	1.08219	Rcor3	REST corepressor 3
ENSMUSG00000034509	0	1.50653	0.434555	Mad2l1bp	MAD2L1 binding protein
ENSMUSG00000056880	1.12914	1.50524	0.278002	Gadl1	glutamate decarboxylase-like 1
ENSMUSG00000026761	0.310035	1.50413	-0.239599	Orc4	origin recognition complex, subunit 4
ENSMUSG00000022451	1.06606	1.50385	-0.646852	Twf1	twinfilin actin binding protein 1
ENSMUSG00000058838	1.06352	1.50228	-0.709212	Rps27a-ps2	ribosomal protein S27A, pseudogene 2
ENSMUSG00000001416	-1.15624	1.50165	-1.28165	Cct3	chaperonin containing Tcp1, subunit 3 (gamma)
ENSMUSG00000029561	1.09919	1.50158	-0.692863	Oasl2	2'-5' oligoadenylate synthetase-like 2
ENSMUSG00000087515	-0.473623	1.50125	0.278549	Gm13554	predicted gene 13554
ENSMUSG00000045954	-0.477962	1.50091	-0.430191	Cavin2	caveolae associated 2
ENSMUSG00000078933	0.23633	1.50084	0.247145	No assciated gene
ENSMUSG00000003847	0	1.49801	-0.747587	Nfat5	nuclear factor of activated T cells 5
ENSMUSG00000031864	0.352525	1.49763	-0.19657	Ints10	integrator complex subunit 10
ENSMUSG00000041264	0	1.49725	0.0286047	Uspl1	ubiquitin specific peptidase like 1
ENSMUSG00000024604	0.663619	1.49555	-0.816938	Rbm22	RNA binding motif protein 22
ENSMUSG00000026987	0.80009	1.49364	0.115393	Baz2b	bromodomain adjacent to zinc finger domain, 2B
ENSMUSG00000066406	1.11634	1.4936	-1.29374	Akap13	A kinase (PRKA) anchor protein 13
ENSMUSG00000095280	0.921139	1.49325	-0.0587927	No assciated gene
ENSMUSG00000031422	1.13893	1.49261	0.733597	Morf4l2	mortality factor 4 like 2
ENSMUSG00000071660	-1.14428	1.49225	0.0424211	Ttc9c	tetratricopeptide repeat domain 9C
ENSMUSG00000003721	-0.354642	1.49119	0.139452	Insig2	insulin induced gene 2
ENSMUSG00000046985	-0.0637592	1.48925	-1.09993	Tapt1	transmembrane anterior posterior transformation 1
ENSMUSG00000053819	0.829964	1.48789	0.884566	Camk2d	calcium/calmodulin-dependent protein kinase II, delta
ENSMUSG00000063001	0.770579	1.48744	-0.163852	Gm9701	predicted gene 9701
ENSMUSG00000098201	0.74821	1.48706	-0.668801	Gm26983	predicted gene, 26983
ENSMUSG00000037851	-0.0283494	1.48674	-0.0153458	Iars	isoleucine-tRNA synthetase
ENSMUSG00000031827	0.725287	1.48654	-1.08936	Cotl1	coactosin-like 1 (Dictyostelium)
ENSMUSG00000001156	0.988039	1.48448	-0.529195	Mxd1	MAX dimerization protein 1
ENSMUSG00000086049	1.21257	1.48287	-0.82207	Gm12735	predicted gene 12735
ENSMUSG00000038085	0.894707	1.48127	0.13802	Cnbd2	cyclic nucleotide binding domain containing 2
ENSMUSG00000059891	0	1.48108	0.86076	Tsks	testis-specific serine kinase substrate
ENSMUSG00000064317	0.11092	1.4791	-0.096557	Gm10146	predicted gene 10146
ENSMUSG00000031858	-0.641435	1.47904	-0.894179	Mau2	MAU2 sister chromatid cohesion factor
ENSMUSG00000089988	0.266889	1.47527	0.0176586	Gm16238	predicted gene 16238
ENSMUSG00000005362	-0.0766619	1.46971	-0.670562	Crbn	cereblon
ENSMUSG00000050244	0	1.46943	-0.422104	Heatr1	HEAT repeat containing 1
ENSMUSG00000030172	1.13807	1.46653	-0.611533	Erc1	ELKS/RAB6-interacting/CAST family member 1
ENSMUSG00000048865	0.218652	1.46161	-1.19694	Arhgap30	Rho GTPase activating protein 30
ENSMUSG00000035215	0.11092	1.46072	0.389883	Lsm7	LSM7 homolog, U6 small nuclear RNA and mRNA degradation associated
ENSMUSG00000050621	-0.787314	1.45894	-1.31385	Rps27rt	ribosomal protein S27, retrogene
ENSMUSG00000025290	0.715643	1.45894	-1.18999	Rps24	ribosomal protein S24
ENSMUSG00000041740	-1.15197	1.45622	-0.398571	Rnf10	ring finger protein 10
ENSMUSG00000024513	1.3213	1.45508	0.129674	Mbd2	methyl-CpG binding domain protein 2
ENSMUSG00000014551	-0.0755193	1.45366	0.0258001	Mrps25	mitochondrial ribosomal protein S25
ENSMUSG00000042156	1.07444	1.45315	0.339704	Dzip1	DAZ interacting protein 1
ENSMUSG00000008604	0	1.45314	-0.205941	Ubqln4	ubiquilin 4
ENSMUSG00000039221	-0.371166	1.45304	-0.970835	Rpl22l1	ribosomal protein L22 like 1
ENSMUSG00000020472	0.266889	1.45149	-0.00898726	Zkscan17	zinc finger with KRAB and SCAN domains 17
ENSMUSG00000030216	-0.534231	1.45106	0.919739	Wbp11	WW domain binding protein 11
ENSMUSG00000053411	0.374224	1.45098	-0.366592	Cbx7	chromobox 7
ENSMUSG00000035439	0.307985	1.45022	0.599822	Haus8	4HAUS augmin-like complex, subunit 8
ENSMUSG00000092674	-0.641158	1.44898	0.245385	Gm24105	predicted gene, 24105
ENSMUSG00000066000	0	1.44459	-0.548952	Zfp979	zinc finger protein 979
ENSMUSG00000042349	0.712468	1.44326	-1.15362	Ikbke	inhibitor of kappaB kinase epsilon
ENSMUSG00000035776	-0.0190632	1.44317	0.95062	Cd99l2	CD99 antigen-like 2
ENSMUSG00000026277	-0.504759	1.44274	0.240739	Stk25	serine/threonine kinase 25 (yeast)
ENSMUSG00000027667	-0.311543	1.44264	-0.349713	Zfp639	zinc finger protein 639
ENSMUSG00000057880	0.120403	1.44221	-0.291935	Abat	4-aminobutyrate aminotransferase
ENSMUSG00000041895	0	1.43977	-0.0305822	Wipi1	WD repeat domain, phosphoinositide interacting 1
ENSMUSG00000081094	0.63466	1.43872	-0.764383	Rpl19-ps11	ribosomal protein L19, pseudogene 11
ENSMUSG00000031879	-0.195922	1.43715	0.0766567	Ciao2b	cytosolic iron-sulfur assembly component 2B
ENSMUSG00000026655	1.29758	1.4355	-1.26721	Fam107b	family with sequence similarity 107, member B
ENSMUSG00000021178	0	1.43516	-0.0352714	Psmc1	protease (prosome, macropain) 26S subunit, ATPase 1
ENSMUSG00000083496	-0.927841	1.43478	-0.533949	Gm11263	predicted gene 11263
ENSMUSG00000037805	0.626794	1.43335	0.788731	Rpl10a	ribosomal protein L10A
ENSMUSG00000057541	0	1.43229	0.130234	Pus7	pseudouridylate synthase 7
ENSMUSG00000026434	-0.776896	1.43183	-0.921064	Nucks1	nuclear casein kinase and cyclin-dependent kinase substrate 1
ENSMUSG00000018474	0	1.43104	-0.0908947	Chd3	chromodomain helicase DNA binding protein 3
ENSMUSG00000017286	-0.664419	1.431	0.752912	Glod4	glyoxalase domain containing 4
ENSMUSG00000078706	0.335985	1.43038	-0.388969	Gm53	predicted gene 53
ENSMUSG00000084274	0.168716	1.42946	-0.123638	Ptma-ps2	prothymosin alpha, pseudogene 2
ENSMUSG00000021482	0.890025	1.42919	0.896888	Prxl2c	peroxiredoxin like 2C
ENSMUSG00000083892	0	1.4288	-0.515905	Gm1848	predicted gene 1848
ENSMUSG00000025409	1.13031	1.42788	0.896155	Mbd6	methyl-CpG binding domain protein 6
ENSMUSG00000081738	-1.08006	1.4259	0.0369997	Hmgb1-ps2	high mobility group box 1, pseudogene 2
ENSMUSG00000061904	0.693103	1.42481	0.0940588	Slc25a3	solute carrier family 25 (mitochondrial carrier, phosphate carrier), member 3
ENSMUSG00000094191	-0.834717	1.42435	-0.760102	Rpl31-ps14	ribosomal protein L31, pseudogene 14
ENSMUSG00000027479	1.07903	1.42385	0.885549	Mapre1	microtubule-associated protein, RP/EB family, member 1
ENSMUSG00000020719	-0.167256	1.41909	-0.134606	Ddx5	DEAD box helicase 5
ENSMUSG00000051185	1.29503	1.41719	-0.85216	Fam174a	family with sequence similarity 174, member A
ENSMUSG00000071867	0.668095	1.41679	0	Mrpl27-ps	mitochondrial ribosomal protein L27, pseudogene
ENSMUSG00000007815	0.829285	1.41476	-1.33552	Rhoa	ras homolog family member A
ENSMUSG00000044768	0	1.41355	0.10385	Macir	macrophage immunometabolism regulator
ENSMUSG00000060791	-0.117727	1.41337	0.331605	Gmfg	glia maturation factor, gamma
ENSMUSG00000050022	0	1.41255	0.300432	Amz1	archaelysin family metallopeptidase 1
ENSMUSG00000028811	-0.0339151	1.41092	-0.608739	Yars	tyrosyl-tRNA synthetase
ENSMUSG00000091639	0.168716	1.41086	-0.170236	Gm3756	predicted gene 3756
ENSMUSG00000001175	1.13817	1.41015	0.34065	Calm1	calmodulin 1
ENSMUSG00000097185	-0.992047	1.40968	-0.0795096	Gm26596	predicted gene, 26596
ENSMUSG00000025269	1.12028	1.40864	-0.0123392	Apex2	apurinic/apyrimidinic endonuclease 2
ENSMUSG00000001632	0	1.40828	0.44193	Brpf1	bromodomain and PHD finger containing, 1
ENSMUSG00000048118	0	1.40759	-0.460951	Arid4a	AT rich interactive domain 4A (RBP1-like)
ENSMUSG00000020362	-0.78312	1.40583	-0.430449	Cnot6	CCR4-NOT transcription complex, subunit 6
ENSMUSG00000020130	-0.765701	1.40421	-0.306119	Tbc1d15	TBC1 domain family, member 15
ENSMUSG00000089944	0.488882	1.40411	-0.75079	No assciated gene
ENSMUSG00000014769	0.154778	1.40352	-1.14509	Psmb1	proteasome (prosome, macropain) subunit, beta type 1
ENSMUSG00000041815	0.289119	1.40263	0.954532	Poldip3	polymerase (DNA-directed), delta interacting protein 3
ENSMUSG00000051723	-0.439381	1.4024	-0.741397	Rpl31-ps13	ribosomal protein L31, pseudogene 13
ENSMUSG00000033278	0.81742	1.40198	0.379467	Ptprm	protein tyrosine phosphatase receptor type M
ENSMUSG00000029836	-0.977728	1.40075	-0.809997	Cbx3	chromobox 3
ENSMUSG00000053553	0	1.39625	0.946735	3110082I17Rik	RIKEN cDNA 3110082I17 gene
ENSMUSG00000084957	-0.322269	1.39483	-0.689085	Bbip1	BBSome interacting protein 1
ENSMUSG00000024065	0.695638	1.39253	1.08986	Ehd3	EH-domain containing 3
ENSMUSG00000020681	0	1.39239	-0.382291	Ace	angiotensin I converting enzyme (peptidyl-dipeptidase A) 1
ENSMUSG00000042331	-0.90135	1.39227	-0.246421	Specc1	sperm antigen with calponin homology and coiled-coil domains 1
ENSMUSG00000026643	0.0931964	1.39167	-0.147348	Nmt2	N-myristoyltransferase 2
ENSMUSG00000026176	0.725465	1.39146	0.188885	Ctdsp1	CTD (carboxy-terminal domain, RNA polymerase II, polypeptide A) small phosphatase 1
ENSMUSG00000001128	0	1.39098	-0.417057	Cfp	complement factor properdin
ENSMUSG00000031221	-0.704909	1.38842	0.490632	Igbp1	immunoglobulin (CD79A) binding protein 1
ENSMUSG00000046897	0.390258	1.38614	-0.412553	Zfp740	zinc finger protein 740
ENSMUSG00000024387	-0.780003	1.38494	-1.2922	Csnk2b	casein kinase 2, beta polypeptide
ENSMUSG00000048379	0.897461	1.38308	0.0437764	Socs4	suppressor of cytokine signaling 4
ENSMUSG00000021866	0.22211	1.38196	-0.0607206	Anxa11	annexin A11
ENSMUSG00000047671	-0.00172741	1.3818	0.0891147	Dynlt4	dynein light chain Tctex-type 4
ENSMUSG00000078552	-0.313073	1.38159	0.276944	Dcdc2b	doublecortin domain containing 2b
ENSMUSG00000014355	0.614778	1.37962	-0.851791	Anapc1	anaphase promoting complex subunit 1
ENSMUSG00000025544	0.12116	1.37857	-1.20301	Tm9sf2	transmembrane 9 superfamily member 2
ENSMUSG00000081572	-0.197065	1.37536	-0.0734347	Gm14138	predicted gene 14138
ENSMUSG00000098428	0.385106	1.37509	-0.07584	No assciated gene
ENSMUSG00000020248	-0.63529	1.3746	-0.783214	Nfyb	nuclear transcription factor-Y beta
ENSMUSG00000071180	0.549785	1.37412	0.26246	Smim15	small integral membrane protein 15
ENSMUSG00000054693	-0.522103	1.37312	0.202267	Adam10	a disintegrin and metallopeptidase domain 10
ENSMUSG00000022010	0.692809	1.37283	-0.515257	Tsc22d1	TSC22 domain family, member 1
ENSMUSG00000021879	0.531951	1.37197	0.0776092	Dnah12	dynein, axonemal, heavy chain 12
ENSMUSG00000020993	0.712693	1.37194	0.293533	Trappc6b	trafficking protein particle complex 6B
ENSMUSG00000040651	0.897268	1.37025	0.438962	Tasor	transcription activation suppressor
ENSMUSG00000086925	0.838669	1.36907	-0.0323087	Gm6286	predicted gene 6286
ENSMUSG00000028874	0.390258	1.36891	0.441242	Fgr	FGR proto-oncogene, Src family tyrosine kinase
ENSMUSG00000091512	0.3364	1.36763	0.157427	Lamtor3	late endosomal/lysosomal adaptor, MAPK and MTOR activator 3
ENSMUSG00000028936	0.669747	1.36678	-1.16613	Rpl22	ribosomal protein L22
ENSMUSG00000094122	0.0474199	1.36578	0.12256	Rpl31-ps9	ribosomal protein L31, pseudogene 9
ENSMUSG00000075015	1.14053	1.36228	-0.562006	Gm10801	predicted gene 10801
ENSMUSG00000002129	0.352525	1.36017	-0.428924	Sf3a1	splicing factor 3a, subunit 1
ENSMUSG00000062352	0.68851	1.35782	-0.0177094	Itgb1bp1	integrin beta 1 binding protein 1
ENSMUSG00000010142	-0.343369	1.35777	0.0947882	Tnfrsf13b	tumor necrosis factor receptor superfamily, member 13b
ENSMUSG00000034480	0.504701	1.35692	0.897098	Diaph2	diaphanous related formin 2
ENSMUSG00000051392	0	1.35511	0	Or13l2	olfactory receptor family 13 subfamily L member 2
ENSMUSG00000040618	0.0698234	1.35508	-0.683679	Pck2	phosphoenolpyruvate carboxykinase 2 (mitochondrial)
ENSMUSG00000068039	0.365576	1.35479	0.44747	Tcp1	t-complex protein 1
ENSMUSG00000072704	-0.975925	1.35154	-0.197286	Smim10l1	small integral membrane protein 10 like 1
ENSMUSG00000016028	0.980341	1.35068	0.332245	Celsr1	cadherin, EGF LAG seven-pass G-type receptor 1
ENSMUSG00000021327	0.312435	1.34879	-1.14964	Zkscan3	zinc finger with KRAB and SCAN domains 3
ENSMUSG00000062480	0.8801	1.3478	0.648067	Acat3	acetyl-Coenzyme A acetyltransferase 3
ENSMUSG00000091803	0.185049	1.34673	-0.546802	Cox16	cytochrome c oxidase assembly protein 16
ENSMUSG00000024847	0.873713	1.3467	-1.12371	Aip	aryl-hydrocarbon receptor-interacting protein
ENSMUSG00000084060	-0.493793	1.34665	-0.168272	Gm16412	predicted pseudogene 16412
ENSMUSG00000097416	0	1.34552	0.839182	Gm26670	predicted gene, 26670
ENSMUSG00000054770	0	1.34526	-0.394965	Kctd18	potassium channel tetramerisation domain containing 18
ENSMUSG00000019189	0	1.34396	-0.558612	Rnf145	ring finger protein 145
ENSMUSG00000022570	-0.536226	1.34313	-0.555575	Gfus	GDP-L-fucose synthase
ENSMUSG00000025199	-0.889396	1.34279	-0.869958	Chuk	conserved helix-loop-helix ubiquitous kinase
ENSMUSG00000032565	0.120403	1.34168	-0.0734347	Nudt16	nudix hydrolase 16
ENSMUSG00000039801	0.168716	1.34154	-0.48135	Cplane1	ciliogenesis and planar polarity effector 1
ENSMUSG00000033417	0.193193	1.3413	0.173802	Cacul1	CDK2 associated, cullin domain 1
ENSMUSG00000056737	0	1.34064	-0.377584	Capg	capping protein (actin filament), gelsolin-like
ENSMUSG00000035840	0.471394	1.33909	-1.23778	Lysmd3	LysM, putative peptidoglycan-binding, domain containing 3
ENSMUSG00000042105	0.54499	1.33795	-0.607784	Inpp5f	inositol polyphosphate-5-phosphatase F
ENSMUSG00000024319	0.382114	1.33645	0.765103	Vps52	VPS52 GARP complex subunit
ENSMUSG00000079177	-0.134093	1.33588	0.107793	Fam228a	family with sequence similarity 228, member A
ENSMUSG00000024948	0.379094	1.33519	-0.704998	Map4k2	mitogen-activated protein kinase kinase kinase kinase 2
ENSMUSG00000055024	-0.547296	1.33252	-0.161302	Ep300	E1A binding protein p300
ENSMUSG00000040093	0.909896	1.33024	0.217931	Bmf	BCL2 modifying factor
ENSMUSG00000021763	0.74118	1.32926	-0.266171	Cspg4b	chondroitin sulfate proteoglycan 4B
ENSMUSG00000020079	0.220646	1.32834	-0.0739658	Supv3l1	suppressor of var1, 3-like 1 (S. cerevisiae)
ENSMUSG00000020220	-0.195922	1.32796	-0.539233	Vps13d	vacuolar protein sorting 13D
ENSMUSG00000027435	0	1.32715	-0.0207651	Cd93	CD93 antigen
ENSMUSG00000029456	0.101809	1.32712	-0.833051	Acad10	acyl-Coenzyme A dehydrogenase family, member 10
ENSMUSG00000024317	1.18144	1.32684	-0.369066	Rnf138	ring finger protein 138
ENSMUSG00000048222	0	1.3265	-0.24941	Mfap1b	microfibrillar-associated protein 1B
ENSMUSG00000067106	0	1.32457	-0.334823	Gm5529	predicted pseudogene 5529
ENSMUSG00000098076	0.74118	1.32406	-0.265331	Gm6981	predicted pseudogene 6981
ENSMUSG00000027620	1.00898	1.32264	0.401214	Rbm39	RNA binding motif protein 39
ENSMUSG00000057886	-1.0738	1.3224	-0.446502	Cbx3-ps6	chromobox 3, pseudogene 6
ENSMUSG00000024997	0.202457	1.32206	-0.0188057	Prdx3	peroxiredoxin 3
ENSMUSG00000034724	0.788103	1.32191	-0.207842	Cnot6l	CCR4-NOT transcription complex, subunit 6-like
ENSMUSG00000096521	0.471394	1.31973	-0.324509	Gm13137	predicted gene 13137
ENSMUSG00000023923	0	1.31782	-0.858012	Tbc1d5	TBC1 domain family, member 5
ENSMUSG00000093904	-0.249596	1.31734	-0.391585	Tomm20	translocase of outer mitochondrial membrane 20
ENSMUSG00000082925	0.384858	1.31715	-1.21708	Gm13135	predicted gene 13135
ENSMUSG00000002307	1.12081	1.31632	0.546173	Daxx	Fas death domain-associated protein
ENSMUSG00000097815	0.3364	1.31594	0.463873	No assciated gene
ENSMUSG00000033460	-0.395586	1.31584	0.00280225	Armcx1	armadillo repeat containing, X-linked 1
ENSMUSG00000028826	0.168716	1.31512	0.303089	Maco1	macoilin 1
ENSMUSG00000016664	-0.688461	1.3131	0.0995615	Pacsin2	protein kinase C and casein kinase substrate in neurons 2
ENSMUSG00000013974	0.235796	1.31252	-0.36944	Mcemp1	mast cell expressed membrane protein 1
ENSMUSG00000036218	0.168716	1.30996	-0.282206	Pdzrn4	PDZ domain containing RING finger 4
ENSMUSG00000000889	0	1.30952	0.185589	Dbh	dopamine beta hydroxylase
ENSMUSG00000028433	0	1.30938	0.111528	Ubap2	ubiquitin-associated protein 2
ENSMUSG00000041936	0	1.30536	-0.442448	Agrn	agrin
ENSMUSG00000082176	0.390258	1.30428	-0.242417	Gm13163	predicted gene 13163
ENSMUSG00000082465	-0.971798	1.30181	-0.666844	Rps6-ps3	ribosomal protein S6, pseudogene 3
ENSMUSG00000081670	0	1.30122	0.136521	Gm15697	predicted gene 15697
ENSMUSG00000005683	0.120403	1.30113	-0.200378	Cs	citrate synthase
ENSMUSG00000032376	-0.266837	1.30075	-0.948155	Usp3	ubiquitin specific peptidase 3
ENSMUSG00000028757	-0.403599	1.30051	-0.116493	Ddost	dolichyl-di-phosphooligosaccharide-protein glycotransferase
ENSMUSG00000055762	0.0863488	1.30043	0.47781	Eef1d	eukaryotic translation elongation factor 1 delta (guanine nucleotide exchange protein)
ENSMUSG00000020115	0.168716	1.3	-1.09826	Tbk1	TANK-binding kinase 1
ENSMUSG00000006024	-0.536071	1.29855	0.644848	Napa	N-ethylmaleimide sensitive fusion protein attachment protein alpha
ENSMUSG00000022770	0.776793	1.29816	0.155442	Dlg1	discs large MAGUK scaffold protein 1
ENSMUSG00000026814	0.74118	1.29779	0.0629815	Eng	endoglin
ENSMUSG00000082431	0.878086	1.2967	0.592691	Prdx2-ps1	peroxiredoxin 2, pseudogene 1
ENSMUSG00000081797	0.0387305	1.29638	-0.123638	Gm8662	predicted gene 8662
ENSMUSG00000029860	1.01632	1.29359	-0.567408	Zyx	zyxin
ENSMUSG00000034088	-0.490365	1.29265	-0.26068	Hdlbp	high density lipoprotein (HDL) binding protein
ENSMUSG00000039599	0.997877	1.29119	-0.971187	Fam149b	family with sequence similarity 149, member B
ENSMUSG00000031381	0.168716	1.2905	-0.309071	Piga	phosphatidylinositol glycan anchor biosynthesis, class A
ENSMUSG00000037610	0.266889	1.29039	-0.303306	Kcnmb2	potassium large conductance calcium-activated channel, subfamily M, beta member 2
ENSMUSG00000000600	0.453691	1.29021	0.604991	Krit1	KRIT1, ankyrin repeat containing
ENSMUSG00000093470	0	1.28929	0.362088	No assciated gene
ENSMUSG00000034247	-0.339161	1.28923	-0.0239551	Plekhm1	pleckstrin homology domain containing, family M (with RUN domain) member 1
ENSMUSG00000040888	0.176633	1.28923	-0.492305	Gfer	growth factor, augmenter of liver regeneration
ENSMUSG00000053916	0	1.28904	0	Nanp	N-acetylneuraminic acid phosphatase
ENSMUSG00000096201	0.894051	1.28818	0.0947065	Gm10715	predicted gene 10715
ENSMUSG00000028010	-0.872847	1.28684	0.184697	Gar1	GAR1 ribonucleoprotein
ENSMUSG00000070639	0.528801	1.28679	-1.2108	Lrrc8b	leucine rich repeat containing 8 family, member B
ENSMUSG00000026810	0	1.28626	-0.388969	Dpm2	dolichol-phosphate (beta-D) mannosyltransferase 2
ENSMUSG00000056228	1.18173	1.28616	0.311118	Cars2	cysteinyl-tRNA synthetase 2 (mitochondrial)(putative)
ENSMUSG00000098369	0.742217	1.28533	0.020717	No assciated gene
ENSMUSG00000058318	0.0732878	1.28388	0.244927	Phf21a	PHD finger protein 21A
ENSMUSG00000074575	0	1.27998	0.434728	Kcng1	potassium voltage-gated channel, subfamily G, member 1
ENSMUSG00000035455	0.531951	1.27892	0.504211	Fignl1	fidgetin-like 1
ENSMUSG00000031822	0.170335	1.27846	-0.623354	Gse1	genetic suppressor element 1, coiled-coil protein
ENSMUSG00000040111	0	1.27764	-0.552201	Gramd1b	GRAM domain containing 1B
ENSMUSG00000004610	1.06213	1.27751	0.409068	Etfb	electron transferring flavoprotein, beta polypeptide
ENSMUSG00000057058	-0.430099	1.27685	0.315844	Skap1	src family associated phosphoprotein 1
ENSMUSG00000067121	0.62	1.27567	-0.408645	Gm7027	predicted gene 7027
ENSMUSG00000089682	0.74118	1.27482	-0.148678	Bcl2l2	BCL2-like 2
ENSMUSG00000090942	0.997877	1.27481	0.252159	F830016B08Rik	RIKEN cDNA F830016B08 gene
ENSMUSG00000096470	0.74118	1.27442	0.0138926	Gm9603	predicted gene 9603
ENSMUSG00000026960	-0.723575	1.27309	0.17203	Arl6ip6	ADP-ribosylation factor-like 6 interacting protein 6
ENSMUSG00000043207	0	1.27278	-0.00485869	Zmpste24	zinc metallopeptidase, STE24
ENSMUSG00000081535	0.120403	1.27255	-0.228902	No assciated gene
ENSMUSG00000024413	-0.849165	1.27035	-0.406357	Npc1	NPC intracellular cholesterol transporter 1
ENSMUSG00000031139	1.07717	1.2703	-0.898554	Mcf2	mcf.2 transforming sequence
ENSMUSG00000068814	0	1.27028	-0.465709	Or12e10	olfactory receptor family 12 subfamily E member 10
ENSMUSG00000022234	0	1.27018	-0.91849	Cct5	chaperonin containing Tcp1, subunit 5 (epsilon)
ENSMUSG00000015176	0.307985	1.26991	0.580486	Nolc1	nucleolar and coiled-body phosphoprotein 1
ENSMUSG00000081895	0.797156	1.2699	0.988114	Rpl17-ps10	ribosomal protein L17, pseudogene 10
ENSMUSG00000003813	0.0389028	1.26924	-0.159355	Rad23a	RAD23 homolog A, nucleotide excision repair protein
ENSMUSG00000041415	1.17541	1.26894	-0.787352	Dicer1	dicer 1, ribonuclease type III
ENSMUSG00000046470	0.902271	1.26742	-0.449848	Sox18	SRY (sex determining region Y)-box 18
ENSMUSG00000096023	-0.129466	1.26603	-0.109519	Gm3542	predicted gene 3542
ENSMUSG00000034832	-0.972772	1.26603	-0.0653717	Tet3	tet methylcytosine dioxygenase 3
ENSMUSG00000061455	0.266889	1.26601	0.338956	Stx17	syntaxin 17
ENSMUSG00000075028	0	1.26431	-0.439854	Prdm11	PR domain containing 11
ENSMUSG00000084260	-0.195922	1.2635	-0.0405204	Gm12844	predicted gene 12844
ENSMUSG00000029859	0.101809	1.26241	0.591064	Epha1	Eph receptor A1
ENSMUSG00000031925	0.620509	1.26156	0.185683	Maml2	mastermind like transcriptional coactivator 2
ENSMUSG00000032458	0.390258	1.26117	0.165302	Copb2	coatomer protein complex, subunit beta 2 (beta prime)
ENSMUSG00000031918	0	1.25984	0.35737	Mtmr2	myotubularin related protein 2
ENSMUSG00000044786	0	1.25956	0.674366	Zfp36	zinc finger protein 36
ENSMUSG00000082454	0.339222	1.25862	-0.645128	Gm12183	predicted gene 12183
ENSMUSG00000042613	-0.900406	1.2574	-0.206864	Pbxip1	pre B cell leukemia transcription factor interacting protein 1
ENSMUSG00000016528	0.153454	1.25675	-0.0903825	Mapkapk2	MAP kinase-activated protein kinase 2
ENSMUSG00000083914	-0.625076	1.25561	0.33787	Rps18-ps1	ribosomal protein S18, pseudogene 1
ENSMUSG00000070493	0.4196	1.25356	0.187813	Chchd2	coiled-coil-helix-coiled-coil-helix domain containing 2
ENSMUSG00000022450	-0.366835	1.25139	-0.751157	Ndufa6	NADH:ubiquinone oxidoreductase subunit A6
ENSMUSG00000023020	-0.311543	1.25092	0.435357	Cox14	cytochrome c oxidase assembly protein 14
ENSMUSG00000021285	0.218436	1.25025	-0.691531	Ppp1r13b	protein phosphatase 1, regulatory subunit 13B
ENSMUSG00000087670	0	1.24891	0	9530036M11Rik	RIKEN cDNA 9530036M11 gene
ENSMUSG00000025162	1.24152	1.24869	0.957464	Csnk1d	casein kinase 1, delta
ENSMUSG00000023132	-0.197065	1.24865	0.565084	Gzma	granzyme A
ENSMUSG00000032199	0.909896	1.24791	0.031461	Polr2m	polymerase (RNA) II (DNA directed) polypeptide M
ENSMUSG00000034087	0.3364	1.24665	-0.179493	Nlrp4b	NLR family, pyrin domain containing 4B
ENSMUSG00000079575	-0.900406	1.246	-0.470568	Rbpj-ps3	recombination signal binding protein for immunoglobulin kappa J region, pseudogene 3
ENSMUSG00000097617	1.07717	1.24557	0	Gm10687	predicted gene 10687
ENSMUSG00000083027	1.0659	1.24407	-1.10749	Gm13140	predicted gene 13140
ENSMUSG00000018677	-0.0441058	1.24222	0.610186	Slc25a39	solute carrier family 25, member 39
ENSMUSG00000026895	0.504449	1.24221	0.266022	Ndufa8	NADH:ubiquinone oxidoreductase subunit A8
ENSMUSG00000021877	0.595618	1.24051	0.272818	Arf4	ADP-ribosylation factor 4
ENSMUSG00000055943	0.266889	1.24051	-0.809778	Emc7	ER membrane protein complex subunit 7
ENSMUSG00000047213	0.453691	1.2398	-0.730601	Ythdf3	YTH N6-methyladenosine RNA binding protein 3
ENSMUSG00000097147	0.74118	1.23957	-0.704385	No assciated gene
ENSMUSG00000025047	-0.234176	1.23694	-0.163403	Pdcd11	programmed cell death 11
ENSMUSG00000022184	-0.361717	1.23489	0.365801	Fbxo4	F-box protein 4
ENSMUSG00000032131	1.07717	1.23344	-0.388969	Abcg4	ATP binding cassette subfamily G member 4
ENSMUSG00000031079	0.235796	1.23037	0.0398592	Zfp300	zinc finger protein 300
ENSMUSG00000051177	1.02479	1.22946	0.0180152	Plcb1	phospholipase C, beta 1
ENSMUSG00000060924	0.224413	1.22921	0.146488	Csmd1	CUB and Sushi multiple domains 1
ENSMUSG00000025264	0.968944	1.22796	0.2434	Tsr2	TSR2 20S rRNA accumulation
ENSMUSG00000081620	0.140063	1.2273	0.382154	Gm14633	predicted gene 14633
ENSMUSG00000058932	0.140063	1.2273	0.340233	Gm2174	predicted gene 2174
ENSMUSG00000034009	0.266889	1.22698	0.232949	Rxfp1	relaxin/insulin-like family peptide receptor 1
ENSMUSG00000021733	0.168716	1.22598	-0.324006	Slc4a7	solute carrier family 4, sodium bicarbonate cotransporter, member 7
ENSMUSG00000027303	0.989991	1.22591	0.238439	Ptpra	protein tyrosine phosphatase receptor type A
ENSMUSG00000028599	-0.558782	1.22466	-0.539459	Tnfrsf1b	tumor necrosis factor receptor superfamily, member 1b
ENSMUSG00000035828	1.07717	1.22164	0.011409	Pim3	proviral integration site 3
ENSMUSG00000095687	-0.669964	1.22075	-0.0672511	Rnaset2a	ribonuclease T2A
ENSMUSG00000082436	0.834899	1.21966	-1.00357	Gm11688	predicted gene 11688
ENSMUSG00000029918	-0.115068	1.21951	-0.668344	Mrps33	mitochondrial ribosomal protein S33
ENSMUSG00000025997	0	1.21861	0.649742	Ikzf2	IKAROS family zinc finger 2
ENSMUSG00000095307	0	1.21856	0	Gm12573	predicted gene 12573
ENSMUSG00000073725	1.17541	1.21794	-0.0113021	Lmbrd1	LMBR1 domain containing 1
ENSMUSG00000082064	-0.0766619	1.21752	-0.0492927	Rpl5-ps2	ribisomal protein L5, pseudogene 2
ENSMUSG00000035673	0	1.21718	-0.619437	Sbno2	strawberry notch 2
ENSMUSG00000069270	0.259944	1.21662	0.648233	H2ac6	H2A clustered histone 6
ENSMUSG00000025584	0.120403	1.21657	-0.430751	Pde8a	phosphodiesterase 8A
ENSMUSG00000067161	0	1.21615	0.248036	Gm5560	predicted pseudogene 5560
ENSMUSG00000024621	0.507004	1.21534	-0.341631	Csf1r	colony stimulating factor 1 receptor
ENSMUSG00000022881	-0.94659	1.21533	-0.304651	Rfc4	replication factor C (activator 1) 4
ENSMUSG00000095994	0.503574	1.21499	0.596252	Gm15084	predicted gene 15084
ENSMUSG00000029174	-0.197065	1.21361	0.322748	Tbc1d1	TBC1 domain family, member 1
ENSMUSG00000074491	0.168716	1.21321	0.703016	Clec4g	C-type lectin domain family 4, member g
ENSMUSG00000095756	0	1.21225	-0.631629	Trav6d-7	T cell receptor alpha variable 6D-7
ENSMUSG00000030134	0.120403	1.21089	-0.171395	Rasgef1a	RasGEF domain family, member 1A
ENSMUSG00000085264	0.74118	1.20967	-0.604009	Gm15581	predicted gene 15581
ENSMUSG00000030660	-0.197065	1.20941	-0.144838	Pik3c2a	phosphatidylinositol-4-phosphate 3-kinase catalytic subunit type 2 alpha
ENSMUSG00000022253	0.146683	1.20816	0.724219	Nadk2	NAD kinase 2, mitochondrial
ENSMUSG00000031505	0.531951	1.20513	-0.0734347	Naxd	NAD(P)HX dehydratase
ENSMUSG00000056492	0.74118	1.20462	0.270795	Adgrf5	adhesion G protein-coupled receptor F5
ENSMUSG00000097255	-0.599548	1.20416	0.278516	Rpl31-ps7	ribosomal protein L31, pseudogene 7
ENSMUSG00000062284	1.08827	1.2041	-0.545178	Gm6030	predicted gene 6030
ENSMUSG00000005611	-0.750472	1.20257	-0.527907	Irag1	inositol 1,4,5-triphosphate receptor associated 1
ENSMUSG00000029020	0.00433864	1.20221	0.139318	Mfn2	mitofusin 2
ENSMUSG00000052748	1.0303	1.20182	-0.479547	Swt1	SWT1 RNA endoribonuclease homolog (S. cerevisiae)
[truncated: 636 more rows]

## Sheet: Cluster 4
Gene ID	Day 4	Day 7	Day 35	Gene Symbol	Gene name
[truncated: 1,358 more rows]

[truncated: 5 more sheets: Cluster 5, Cluster 6, Cluster 7, Cluster 8, Cluster 9]
