# Supplementary material for: Exploring the Role of Platelets in Virus-Induced Inflammatory Demyelinating Disease and Myocarditis
Source: Int J Mol Sci. 2024 Mar 19;25(6):3460. doi: 10.3390/ijms25063460 (PMC10970283; doi:10.3390/ijms25063460)
Supplement: Supplementary file 1 [file ijms-25-03460-s001.zip › Supplemental Table S7.xlsx]

## Sheet: Cluster 1
DAVID functional clustering of genes in cluster 1 of platelet transcriptome of TMEV-infected mice
Cluster #	Pathway	Enrichment Score	Gene IDs
1	ribonucleoprotein complex	6.15072	Mrpl28, Rps9, Srp14, Mrps21, Rps25, Mrpl10, Rpl35, Eif4a3l1, Rpl29, Rps28, Lsm1, Rpl27a, Rps11, Cpsf6, Actb, Eif4a3, Mrpl20, Rpl13, Rps7, Rbm12, Rpl18a, Rpl11, Rpl35rt, Slbp, Csnk1e, Zfp36l1, Celf2, Mrpl22, Mrpl57, Fau, Rps21, Eef2, Rpl28
2	protein heterodimerization activity	5.50094	H2bc3, Mef2c, Tpm2, Sdcbp, Pik3r1, H2bc22, H2ac24, H2bc21, H2bc11, H2bc7, H2ac11, H3f3b, Abtb2, H2bc1, Taf1, Tpm4, Chrac1, Fxr1, H2bc12, Trp53, P2ry1, H2bc8, Bcl11a, Micu1, H2ac23, H2bc15, H2bc4, H3c3
3	Ubl conjugation pathway	3.22306	Otud5, Trim50, Ambra1, Usp9x, Rnf19a, Kbtbd2, Ube2e3, Senp1, Neurl1a, Desi2, Josd1, Ube2c, Vcpip1, Ube2w, Atg12, Rnf144b, Phf23, Mex3c, Rnf14, Keap1, Ube2f, Pias1, Map1lc3b, Wwp2, Ufsp2, Nedd8, Ube2l3, Birc6, Traf6, Dcaf8, Rnf187, Peli1, Map1lc3a, Fbxl17, Uchl5, Marchf8, Trip12, Mgrn1, Appbp2, Smurf2, Otulin, Otud7b, Ppp1r11, Sumo2, Rbbp6, Ube2z
4	mitochondrial inner membrane	2.99675	Mrpl28, Ndufa10, Mrps21, Vdac3, Stmp1, Mrpl10, Uqcrc1, Sfxn1, Vdac2, mt-Nd4l, mt-Nd4l, Mpc2, Ndufb4, Tomm22, Cpt2, Sod2, Ndufb7, Smim20, Ndufa3, Ldhb, Atp5mg, Slc25a15, Mrpl20, Atp5pb, Micu1, Csde1, Tafazzin, Ndufs1, Mdh2, Mrpl22, Mrpl57, Cox6b1, Atp5mk, Cox8a
5	endoplasmic reticulum	2.7024	Glrb, Ambra1, Emc4, Aimp1, Tex2, Pmel, Rheb, Tmem50a, Tapbp, Rpl27a, Ptdss1, Pkd2, Cmah, Uba52, Ifi47, Ufsp2, Gabarapl2, Slc30a9, Tpst2, Retsat, Dnaja1, Gigyf2, Pi4k2b, Lpin2, Cnr2, Rpl13, Inpp5k, Bcap29, Ftcd, Cd74, Elovl6, Eef1g, Marchf8, Mgrn1, Ssr1, Tmem33, Uba52rt, Prkca, Ergic3, Ost4, Emc3, Rpl36a, Shisa3, Creld2, Sdcbp, Colgalt1, Arb2a, Sgpp1, Sec22b, Gusb, Hmgb1, Rps28, Cybc1, Vcpip1, Dna…
6	GTP binding	2.62364	Ndufa10, Dnah3, Rasl10a, Arf1, Rab5c, Ift22, Pals1, Rheb, Rac1, Eif4a3l1, Camta1, Psmc6, Nol9, Rab6a, Vps4a, Vps4b, Ifi47, Rab6b, Ift27, Rab8b, Atp6v1a, Tpst2, Dck, Nav1, Eif4a3, Gnas, Rhof, Gspt1, Rab14, Gimap6, Gtpbp4, Gna13, Arl4a, Rab37, Rap2a, Gnl3, Chd9, Eef2, Abca5, Abca7
7	Ubiquitin mediated proteolysis	2.61766	Ube2e3, Birc6, Traf6, Trip12, Ube2c, Ube2w, Mgrn1, Smurf2, Keap1, Uba52, Ube2f, Pias1, Wwp2, Ube2z, Ube2l3
8	Golgi apparatus	2.58905	Axin1, Arf1, Aimp1, Stk16, Ift20, Pmel, Pals1, Rheb, Trappc10, Mgat1, Vps53, Scamp2, Rab6a, Csgalnact2, Glt8d1, Pkd2, Itm2a, Ift27, Gabarapl2, Tpst2, Gigyf2, Pi4k2b, Galnt1, Mapk1, Rab14, Clint1, Ftcd, Cd74, Ppt1, Marchf8, Rab37, Tm9sf4, Ergic3, Gpr107, Rabac1, Creld2, Sec22b, Litaf, Ap1b1, Vcpip1, Zdhhc4, Tbc1d23, Fam234b, Zdhhc18, Pgap4, Slc35b4, Man2a2, Rab6b, Mphosph9, Ap1m1, Zdhhc13, Bet1l, …
9	protein transport	2.53249	Slc12a6, Glrb, Vdac3, Arf1, Txnl1, Slc5a9, Tex2, Sfxn1, Mpc2, Trappc10, Ap2m1, P2rx1, Vps53, Scamp2, Rab6a, Ndufb7, Pkd2, Cmah, Vps4a, Vps4b, Ndufa3, Ift27, Bbs2, Mfsd2b, Gabarapl2, Atp6v1a, Slc30a9, Arrb1, Eif4a3, Kpna6, Cachd1, Rab14, Bcap29, S100a13, Slc44a2, Atox1, Rab37, Clic4, Pkd2l2, Ergic3, Ndufa10, Tmx4, Slc7a3, Tnpo2, Rab5c, Dynll2, Uqcrc1, Pik3r1, Vdac2, Sec22b, mt-Nd4l, mt-Nd4l, Slc26…
10	SAP domain	2.40347	Sltm, Ccar1, Pias1, Sf3b2, Dek
11	Glycyl thioester intermediate	2.08351	Trip12, Ube2c, Ube2w, Ube2e3, Birc6, Smurf2, Ube2f, Ube2z, Wwp2, Hectd4, Ube2l3
12	ribosomal small subunit biogenesis	2.02014	Rps28, Rps9, Fau, Rps25, Rps21, Rps11, Rps27, Mcts1, Rps7, Uba52, Larp4
13	Diabetic cardiomyopathy	1.88604	Ndufa10, Vdac3, Sp1, Atp5pb, Uqcrc1, Pik3r1, Vdac2, mt-Nd4l, mt-Nd4l, Mpc2, Rac1, Ndufs1, Ndufb4, Cpt2, Ndufb7, Pten, Ndufa3, Cox6b1, Cox8a, Prkca
14	autophagy	1.70889	Fundc1, Ambra1, Trp53, Map1lc3a, Hmgb1, Tecpr1, Phf23, Atg12, Cd84, Vps4a, Vps4b, Map1lc3b, Gabarapl2
15	L-lysine transmembrane transport	1.70695	Slc7a3, Slc25a15, Slc25a2
16	anchoring junction	1.69089	Ambra1, Ptk2b, Palld, Yap1, Sdcbp, Tnk2, Mapk1, Mast2, Pals1, Ptprj, Cdc42bpb, Parvb, Itgb3, Ubn1, Clic4, Cldn2, Pecam1, Vasp, Lpp, Lims1
17	nucleic acid binding	1.51353	Rbpms2, Eif4b, Tigd4, Tardbp, Rbm18, Rac1, Hmgb1, Qki, Mex3c, Cirbp, Arpp21, Fxr1, Sltm, Cpsf6, Khdrbs1, Rbm27, Eif4a3, Zmat3, Rbm12, Csde1, Larp4, Rcan1, Tra2b, Celf2, Rbbp6, Rcan2, Tut7
18	Actin-related protein	1.44132	Actb, Actr2, Actc1, Acta1
19	chromatin remodeling	1.378	Rbbp4, Uchl5, Gatad2a, Actb, Dpf2, Hdgf, Ezh1, Pbrm1, Dek, Chrac1, Arid2
20	Phosphatidylinositol signaling system	1.29875	Pip4k2a, Bpnt2, Pi4k2b, Pten, Pik3r1, Mtm1, Prkca, Pik3c2b, Dgka
21	regulation of cyclin-dependent protein serine/threonine kinase activity	1.28626	Gtpbp4, Actb, Ccnh, Ccnl1, Ccny, Ccne1
22	ubiquitin ligase complex	1.26746	Med23, Ube2c, Rnf19a, Rnf144b, Smurf2, Ypel5, Rnf14, Ube2l3
23	Transcription regulation	1.24658	Foxp1, Gon4l, T2, Mef2c, Zfp664, Ambra1, Hdgf, Hhex, Banp, Ubp1, Pbrm1, Med23, Ahdc1, Hexim2, Dpf2, Mterf3, Pias1, Taf1, Lmo3, Slc30a9, Rbbp4, Arrb1, Lpin2, Yap1, Bcl11a, Zfpm1, Nab1, Ezh1, Uchl5, Rad21, Nlk, Hoxa5, Ccnh, Kmt2c, Hinfp, Bcl11b, Sp1, Mcts1, Tardbp, Eaf1, Lcor, Notch2, Litaf, Zbtb4, Rb1, Nelfcd, Camta1, Gatad2a, Lyar, Rnf14, Nelfb, Foxh1, Ccar2, Kctd1, Ube2l3, Arid2, Trp53bp1, Hmgn5…
24	Ubiquitin	1.19069	Fau, Sumo2, Uba52, Ubl3, Nedd8
25	positive regulation of lamellipodium assembly	1.16481	Rac1, Actr2, Pik3r1, Arpc2
26	lysosome	1.12373	Lrrc8a, Acp3, Cdip1, Cat, Npc2, Rab14, Ostm1, Litaf, Cd74, Gusb, Ppt1, Lamtor5, Ctla2a, Marchf8, Pip4k2a, Tecpr1, Vps4a, Tmem150c, Ctsz, Fnbp1, Abca5, Atp6v1a
27	Protein biosynthesis	1.12057	Eef1g, Eif4g1, Eif4b, Aimp1, Mcts1, Gspt1, Eif1b, Eef2, Larp4, Eif6
28	protein import into nucleus	1.11905	Syk, Lmna, Tnpo2, Trp53, Ranbp6, Fam53b, Rpain, Kpna6, Pik3r1
29	actin cytoskeleton organization	1.07963	Tmsb10, Csrp3, Grid2ip, Palld, Sdcbp, Cap1, Actr2, Cdc42bpb, Anxa1, Rac1, Ssh1, Parvb, Elmo1, Rap2a, Vasp, Flna, Inf2
30	heterochromatin assembly	1.04876	Hmgb1, Rbbp4, H2ac23, Rb1, H2ac24, Lmna, H2ac11, Ezh1

## Sheet: Cluster 2
DAVID functional clustering of genes in cluster 2 of platelet transcriptome of TMEV-infected mice
Cluster #	Pathway	Enrichment Score	Gene IDs
1	Golgi apparatus	6.51777	Cnst, Ugcg, Cttn, Tlr1, Cav2, Nsfl1c, Arl3, St3gal5, Grina, Lztr1, Rassf2, Mmp24, Vipas39, Gopc, Rab13, Cbln3, Nucb1, Mink1, Ergic2, Lat, Casd1, Grb2, Nfe2l2, Tango2, Rps12-ps24, Rock1, Surf4, B4galt1, Golph3l, Clcc1, Rab36, Trip11, M6pr, Pitpnm1, Sys1, Llgl1, Lrrk2, Cert1, Ap3m1, Tmem87a, Pcsk7, Ubac1, Slc9a8, Csgalnact1, Bet1, Zdhhc7, Chst15, Fig4, Arhgap4, Rab11b, Prnp, Syne1, Lyn, Dynlt1b, Sr…
2	Ubl conjugation	5.68075	Rpl5, Cttn, Hnrnpa3, Mdc1, Ell2, Slc40a1, Nqo1, Phf20l1, Gpalpp1, Suv39h1, Utp11, Cnot4, Eloc, Azin1, Blk, Rbm34, Nfe2l2, Rnf181, Mycbp2, Nkap, Sf3b1, Pim1, Xiap, Dazap2, Nfkbia, Elk4, Fbxo30, Rffl, Rplp0, Rbm8a, H2bc6, Zfp451, Pnpla2, Stag1, Irf2, Set, Nfkb1, Etv3, Zbtb7b, Snrnp200, Slx4, Trip4, Ube2l6, Cenpc1, Trmt1l, Raly, Park7, Eif3j1, Lyn, Srebf2, Slc38a2, Zc3h14, Rbm8a2, Ston2, Traf4, Rere…
3	Transferase	2.54446	Pip5k1c, Sphk2, Fdft1, Taok1, St3gal5, Flad1, Cdk2, Rbx1, Adk, Suv39h1, Cnot4, Pign, Blk, Bcat1, Ckb, Rnf181, Mycbp2, Nek7, Agl, Ilk, Tk2, Gstp1, Znrf2, Nt5c3, Pim1, Xiap, Rffl, Riok1, Zfp451, Csgalnact1, Chst15, Polr2b, Ube2l6, Pkn2, Trmt1l, Csnk2a2, Lyn, Erbb2, Tie1, Prdx6, Traf4, Riok3, St3gal6, Fyn, Papss1, Cdc42bpa, Mob1b, Ube2j1, Mkrn1, Rnf220, Kalrn, Trim32, Ficd, Rnf146, Hadhb, Ugcg, Coq8…
4	Ubl conjugation pathway	2.44477	Spop, Commd10, Ube2l6, Wwp1, Mindy2, Lztr1, Rbx1, Traf4, Asb3, Fbxl2, Usp46, Mid1, Cnot4, Eloc, Wsb2, Rnf181, Klhl25, Mycbp2, Znrf2, Cul1, Ube2j1, Mkrn1, Fbxw11, Rnf220, Xiap, Kctd10, Atxn3, Fbxo30, Rffl, Ankib1, Usp38, Mylip, Ubac1, Zfp451, Dcun1d1, Hltf, Trim32, Rnf111, Anapc13, Cul4a, Eif3f, Rnf146
5	Motor proteins	2.25143	Tpm1, Dynlt1f, Dynlt3, Myl12b, Dynlt1c, Hook3, Dynlt1b, Myo1h, Dynlt1a, Tnnt2
6	Chaperone	2.24685	Dnajb9, Trap1, Erp44, Dnaja4, Dnajb6, Mkks, Park7, Timm10b, Hspa5, Cnpy3, Canx, Hspa4l, Hsp90ab1, Sec63, Hspe1, Set
7	Mitochondrion	2.18736	Trap1, Mrpl9, Hadhb, Sphk2, Micos13, Coq8a, mt-Atp8, Ndufa4, Fahd1, Spg7, Hk1, Hspe1, Slc25a20, Mtif3, Tug1, Ckb, Tango2, Tk2, Gstp1, Mgst1, Ralbp1, Ppp6c, Stard7, Timm10b, Idh3b, Akap10, Mtfr1, Ghitm, Mmut, Iscu, Chchd7, Lrrk2, Cox6b2, Mavs, Mcur1, Park7, Uqcr11, Rsad2, Atp5f1e, Atp5me, Cox4i1, Ethe1, S100a1, Chchd3, Slc30a7, Bltp2, Cox6c, Bcl2l11, Cox7a2, Bnip3l, Mrpl13, Atp5pf, Rnasel, Guf1, S…
8	RNA binding	2.16928	Ybx3, Rpl5, Nono, Trap1, Larp4b, Hnrnpa3, Rbm5, Raly, Trmt1l, Thoc3, Park7, Zfp36l2, Wbp4, Zc3h14, Ifit2, Fbl, Peg10, Eif4e3, Nom1, Hnrnpr, Cdkn2aip, Matr3, Cnot4, Nxf1, Rbm34, Tent4b, Rps20, Snrpg, Sf3b1, Rnasel, Srsf10, Eif3a, Zc3hav1, Hnrnph2, Sidt1, Pum2, Snrpb, Mbnl2, Tnrc6b, Larp7, Ybx1, Ddx3x, Mir27b, Gtf3a, Trim32, Pcbp1, Dhx40
9	mRNA processing	2.12228	Nono, Snrnp200, Hnrnpa3, Rbm5, Raly, Thoc3, Fam50a, Snrnp25, Wbp4, Rbm8a2, Bcas2, Smu1, Clns1a, Prmt9, Tent4b, Snrpg, Sf3b1, Rnasel, Ppil3, Srsf10, Snrpb, Mbnl2, Sap18, Larp7, Ybx1, Rbm8a, Pcbp1
10	endoplasmic reticulum	2.12198	Rpl5, Ehd4, Hadhb, Cttn, Sphk2, Stom, Erp44, Treml4, Fdft1, Cav2, Grina, Tmcc3, Cnpy3, Plekhf2, Pomk, Cbln3, Mcrs1, Snx10, Ergic2, Spcs1, Retreg3, Pign, Sec13, Dnajb9, Cnbp, Arxes2, Mgst1, Surf4, Nt5c3, Nrros, Clcc1, Pitpnm1, Lmbr1l, Rplp0, Lrrk2, Cert1, Pcsk7, Dipk1a, Bet1, Zdhhc7, Lrrc8c, Fig4, Set, Phtf2, Stt3a, Emc1, Magea9, Vma21, Prnp, Bcap31, Park7, Srebf2, Rsad2, Ifit2, Hspa5, Canx, Uggt1…
11	Src homology-3 domain	1.99535	Cttn, Lyn, Trp53bp2, Kalrn, Prmt2, Sh3glb2, Asap1, Cd2ap, Cacnb1, Sh3glb1, Mpp1, Blk, Grb2, Arhgap4, Fyn
12	Pathways of neurodegeneration - multiple diseases	1.78163	Trap1, Nfkb1, Ube2l6, Spg11, Prnp, Park7, Csnk2a2, Uqcr11, mt-Atp8, Ndufa4, Sod1, Hspa5, Atp5f1e, Psma3, Cox4i1, Psen1, Cox6c, Calm2, Cox7a2, Pik3r4, Ube2j1, Atp5pf, Psma7, Atxn3, Psma2, Gsk3b, Fzd1, Lrrk2, Casp3, Gnaq, Fig4, Cox6b2
13	WD40/YVTN repeat-like-containing domain	1.7526	Wsb2, Sec13, Skic8, Wdr13, Nsmaf, Eml5, Pik3r4, Thoc3, Fbxw11, Gnb5, Wdr37, Smu1, Llgl1, Lrrk2, Pak1ip1, Spag9, Herc1, Eml3, Emc1
14	Transport	1.70545	Atp6v0b, Snx30, Slc40a1, Thoc3, mt-Atp8, Arl3, Ndufa4, Peg10, Vipas39, Plekhf2, Gopc, Rab13, Abcb1a, Snx10, Ergic2, Nxf1, Aagab, Vps36, Slc25a20, Sec13, Exoc8, Kcnj5, Surf4, Hook1, Ralbp1, Vps29, Clcc1, Rab36, Timm10b, M6pr, Pitpnm1, Sys1, Tmem63a, Abcb4, Cert1, Rbm8a, Ap3m1, Slc9a8, Bet1, Lrrc8c, Slc1a5, Rab11b, Snf8, Dynlt3, Acbd5, Bcap31, Mcur1, Dynlt1b, Uqcr11, Ank, Xpo7, Slc38a2, Rbm8a2, Kpn…
15	Arfaptin homology (AH) domain/BAR domain	1.68423	Sh3glb1, Snx30, Bin3, Sh3glb2, Asap1, Arhgap4, Ophn1
16	estrogen receptor binding	1.6735	Trip4, Cnot1, Lef1, Ccdc62, Ncoa6, Prmt2, Taf10, Ncoa3
17	cellular protein localization	1.60132	Exoc8, Lrrk2, Septin2, Cdc42, Sfn, Lamtor1, Ywhah, Ywhab
18	C3H1-type	1.56279	Mbnl2, Mkrn1, Zfp36l2, Cnot4, Zc3hav1, Zc3h14
19	lysosome	1.50345	Sec13, Znrf2, Sphk2, Vma21, Kics2, Rubcn, Pip4p2, Cd164, Tasl, Borcs7, Sidt1, Sod1, Prdx6, M6pr, Tmem63a, Lrrk2, Siae, Spag9, Tab2, Vps36, Stx7, Lamtor1, Lamp1, Atp6ap2
20	Protein biosynthesis	1.50339	Eif4e3, Guf1, Eif3j1, Eif3a, Eif3j2, Eif3j2, Vars1, Eif3f, Mtif3
21	Protein export	1.47814	Sec11c, Arxes2, Sec63, Spcs1, Hspa5
22	Cell cycle	1.4426	Dynlt3, Cdk2ap1, Mdc1, Mcm3, Pkn2, Cdc25b, Cenpc1, Csnk2a2, Dynlt1b, Bin3, Arl3, Cdc42, Cd2ap, Rassf2, Cdk2, Suv39h1, Foxn3, Tent4b, Septin2, Esco1, Ppp6c, Fbxw11, Pim1, Trp53bp2, Nusap1, Gadd45a, Recql5, Pttg1, Rps6kb1, Spice1, Stag1, Lzts2, Melk, Ticrr, Anapc13, Eml3
23	REPEAT:2-1	1.29926	Canx, Prrc2a, Hnrnph2, F5
24	Mitochondrion	1.29151	Trap1, Mrpl9, Hadhb, Sphk2, Micos13, Coq8a, mt-Atp8, Ndufa4, Fahd1, Spg7, Hk1, Hspe1, Slc25a20, Mtif3, Tug1, Ckb, Tango2, Tk2, Gstp1, Mgst1, Ralbp1, Ppp6c, Stard7, Timm10b, Idh3b, Akap10, Mtfr1, Ghitm, Mmut, Iscu, Chchd7, Lrrk2, Cox6b2, Mavs, Mcur1, Park7, Uqcr11, Rsad2, Atp5f1e, Atp5me, Cox4i1, Ethe1, S100a1, Chchd3, Slc30a7, Bltp2, Cox6c, Bcl2l11, Cox7a2, Bnip3l, Mrpl13, Atp5pf, Rnasel, Guf1, S…
25	polyamine metabolic process	1.28163	Amd1, Azin1, Amd2
26	localization	1.26748	Spop, Snf8, Was, Cdc42bpa, Stag1, Pak2
27	TRANSMEM:Helical; Anchor for type IV membrane protein	1.25417	Ube2j1, Stx5a, Syne1, Bet1, Stx7, Stx12, Vamp3
28	cellular response to DNA damage stimulus	1.2492	Nono, Slx4, Dcun1d5, Mdc1, Park7, Lyn, Taok1, Cdk2, Rbx1, Gnl1, Mcrs1, Suv39h1, Psen1, Cdkn2aip, Ncoa6, Blk, Bcl3, Cdc14b, Sfr1, Xiap, Pnkp, Gadd45a, Recql5, Nsmce4a, Pttg1, Casp3, Ticrr, Epc2, Rnf111, Cul4a
29	SH3 domain binding	1.21299	Picalm, Wipf1, Was, Ilk, Pttg1, Plscr2, Adam17, Trp53bp2, Lyn, Cd2ap, Grb2
30	Human T-cell leukemia virus 1 infection	1.18418	Nfkb1, Il2, Xiap, Cd3g, Elk4, Nfkbia, Cdk2, Tbpl1, Canx, Tgfb1, Pttg1, Nfatc3, Il15, Anapc13, Stat5b
31	Oxidative phosphorylation	1.18074	Atp5f1e, Atp6v0b, Atp5me, Cox7a2, Cox4i1, Atp5pf, Uqcr11, mt-Atp8, Ndufa4, Cox6b2, Cox6c
32	lyase activity	1.16329	Ppcdc, Echdc1, Umps, Amd1, Tbxas1, Amd2, Amd2, Rsad2, Fahd1
33	Pleckstrin homology-like domain	1.15931	Rasa3, Dock10, Was, Exoc8, Wipf1, Cdc42bpa, Rock1, Nsmaf, Bcr, Def6, Kalrn, Asap1, Dcp1b, Plekhf2, Clns1a, Cert1, Mylip, Vps36, Plekha2, Psd3, Ophn1
34	GTPase activator activity	1.10915	Rasa3, Arhgdia, Ralbp1, Bcr, Rasgrp3, Rgs18, Gnb5, Gapvd1, Asap1, Gipc1, Llgl1, Lrrk2, Gnaq, Grtp1, Arhgap4, Ophn1
35	immune system process	1.07644	Nono, Olr1, Treml4, Tasl, Lyn, Tlr1, Irf8, Cd3g, Rsad2, Ifit2, Cd247, Cnpy3, Traf4, Riok3, Hk1, Matr3, Lat, Fyn, Nlrp6, Cd81, Rubcn, Ppp6c, Il2, Zc3hav1, Cd79b, Cd14, Ddx3x, Cr1l, Slamf6, Irf2, Mavs
36	microtubule	1.06451	Dynlt3, Bcl2l11, Eml5, Hook1, Clip2, Eif3a, Camsap1, Nusap1, Ndrg1, Ccdc181, Dyrk1a, Gsk3b, Nckap5l, Dpp9, Hook3, Lzts2, Mid1, Arhgap4, Eml3
37	mmu04062:Chemokine signaling pathway	1.05686	Nfkb1, Was, Rock1, Xcr1, Rap1b, Lyn, Gnb5, Cxcl3, Cdc42, Nfkbia, Gsk3b, Gnaq, Stat5b, Gng11, Grb2
38	Nucleotide-binding, alpha-beta plait	1.0495	Nono, Hnrnpa3, Raly, Rbm5, Srsf10, Hnrnph2, Rbm8a2, Tnrc6b, Tmem63a, Larp7, Rbm8a, Hnrnpr, Matr3, Cnot4, Nxf1, Rbm34
39	cellular response to oxidative stress	1.03619	Nfe2l2, Nqo1, Lrrk2, Park7, Naglu

## Sheet: Cluster 3
DAVID functional clustering of genes in cluster 3 of platelet transcriptome of TMEV-infected mice
Cluster #	Pathway	Enrichment Score	Gene IDs
1	Ubl conjugation	9.22331	Rchy1, Dnmt1, Ltn1, Setd3, Csnk2b, Psmd4, Orai1, Cbx3, Rps27a, Arid4a, Crebbp, Zfp36, Hjurp, Dapk1, Ppp2ca, Larp1, Map4k2, Wdhd1, Fbxl5, Bcl10, Gpatch8, Igbp1, Ccnd2, Rpl30, Mapkapk2, Mfn2, Pim3, Cdc23, Rhoa, Rpn2, Cux1, Mxd1, E4f1, Cdca2, Map3k5, Sf3a1, Nrip1, Ptbp1, Epc1, Poldip3, Etf1, Ikbke, Csrp1, Stk38, Rpl24, Smc1a, Eme1, Pold1, Eps8, Prkaa1, Traf7, Uba2, Tet3, Mdm4, Aff4, Kmt2e, Dtnbp1, D…
2	ribonucleoprotein complex	8.15761	Rps27a, Hnrnph3, Vim, Zfp36, Rpl9, Mrps33, Rpl19, Rpl12, Rpl13a, Rpl23, Gar1, Rpl10a, Rplp1, Rpl30, Hnrnpll, Rps6, Ncbp1, Rack1, Mrpl27, Rps18, Mrps23, Hnrnpa1, Mrps18a, Rpl22, Rplp2, Actn4, Rpl22l1, Rps16, Rps10, Iqgap1, Rpl31, Mrpl19, Gadd45gip1, Rps24, Nsa2, Rpl38, Rpl6, Rpl7, Rpl24, Jakmip1, Rbms2, Mrps2, Mrps25, Lsm7, Krr1, Lsm14a, Cbx5, Rpl7a, Dhx9, Rps23, Hspa8, Ddx5, Mrpl41, Ago2
3	endoplasmic reticulum	4.21653	Cyp7b1, Cds2, Ero1b, Insig2, Lama3, Iigp1, Glud1, Fbxo2, Creb3l4, Tor1a, Rnf145, Peds1, Lrrc59, Plin1, Atl2, Cers2, Tmem43, Zmpste24, Bcl2l1, Rpn2, Stx17, Npc1, Nbas, Map3k5, Rtn4, Alg2, Marchf6, Card19, Atp8a1, Zfyve27, Uba5, Sec61b, Ankrd13c, Acer3, Alkbh1, Pja2, Cyp2b10, Rps24, Zw10, Tmc6, Pgrmc1, A1cf, Dicer1, Erg28, Rpl24, Bltp1, Cyp4a10, Pml, Aoc3, Slc10a7, Pom121, Igtp, Dtnbp1, Tmed7, Rpl3…
4	Innate immunity	4.11222	Sema4a, Btla, Tmem106a, Tfe3, Orai1, Iigp1, Mpeg1, Inpp5d, Cfh, Csf1r, Hexim1, Cd24a, Hmgb2, Ifitm2, Il4ra, Map4k2, Trim65, Bcl10, Tlr13, Rnf213, Csk, Nlrc5, Ets1, Gbp4, Tmem43, Cd79a, Tlr12, Gm43302, Ptpn22, Map3k5, Psmb8, Znfx1, Tnfrsf13b, Slamf1, Cyld, Gbp9, Ythdf1, Oas3, Padi4, Cd300e, Adar, Itch, Tnfsf18, Il17ra, Themis, C4b, Cfp, Rnaset2a, Nlrx1, Pml, Slfn8, Nod2, Parp1, Igtp, Skap1, Oasl2,…
5	protein transport	3.58888	Ero1b, Orai1, Snx15, Vps13d, Rabgap1l, Zfp36, Pex1, Atg4a, Slc22a23, Kcnmb2, Aqp9, Dennd1b, Txn2, Trpm7, Ncbp1, Stx17, Cux1, Npc1, Washc3, Ndc1, Nbas, Atg16l2, Cog1, Hnrnpa1, Actn4, Atp8a1, Catsper1, Sec61b, Cmtm6, Slc41a3, Zw10, Tmc6, Poldip3, Slc25a3, Sft2d2, Slc4a8, Arf5, Macir, Triap1, Jakmip1, Unc119, Best3, Stard5, Rbsn, Stx4a, Uqcrh, Abcc9, Atp5pd, Napa, Slc10a7, Pom121, Abcg4, Ndufa6, Tme…
6	Actin-binding, cofilin/tropomyosin type	2.84196	Gmfg, Cfl2, Cotl1, Gmfb, Twf1
7	GTP binding	2.79274	Gbp9, Nudt16, Dnm2, Septin9, Urgcp, Ehd3, Tubb2a, Nras, Gpn1, Iigp1, Gucy1b1, Arf5, Glud1, Rtcb, Rhebl1, Rab18, Arf4, Tubb1, Gtpbp8, Dapk1, Rabl3, Noa1, Srp54a, Gimap1, Adss2, Atl2, Gbp4, Rrad, Rab43, Igtp, Mfn2, Rasd1, Pck2, Rhoa, Gimap5, Gm43302, Ola1, Rab27b, Gnai3, Arl5c, Septin7, Anxa6, F830016B08Rik
8	Pathways of neurodegeneration - multiple diseases	2.6702	Itpr2, Tnfrsf1a, Slc25a5, Tubb2a, Csnk2b, Psmd4, Nras, Dnah5, Rps27a, Xbp1, Wipi1, Psmc1, Mapt, Atp2a3, Tubb1, Dctn4, Ndufb2, Dnah12, Uqcrh, Plcb2, Uqcrfs1, Atp5pd, Psmb1, Mfn2, Plcb1, Ndufa6, Ndufa8, Bcl2l1, Tnfrsf1b, Ndufs7, mt-Nd6, mt-Nd6, Calm1, Psma6, Htra2, Frat2, Tbk1, Map3k5, Snca, Dnah7b, Rb1cc1, Daxx, mt-Nd4, Camk2d, Kif5a, Psma1
9	actin binding	2.65661	Ccdc88a, Mrtfb, Actr3, Setd3, Gmfb, Myo1f, Ace, Myh9, Whamm, Diaph2, Ptk2, Gmfg, Eps8, Capg, Map2, Nod2, Arpc3, Ssh3, Trpm7, Sptb, Ablim1, Cfl2, Cobl, Add3, Twf1, Myh6, Add1, Mefv, Snca, Sptbn1, Mylk, Phactr1, Myo1g, Syne2, Smtn, Wipf2, Cotl1, Actn4, Afap1, Itgb1, Epb41l2, Msn
10	Calponin homology domain	2.64123	Ccdc88a, Arhgef6, Sptb, Mapre2, Mapre1, Specc1, Sptbn1, Smtn, Syne2, Actn4, Nav2, Iqgap1, Gas2l1
11	protein phosphorylation	2.52331	Nudt16, Atad3a, Septin9, Pik3c2a, Urgcp, Tubb2a, Myo1f, Gpn1, Iigp1, Rfc4, Chuk, Glud1, Rtcb, Tor1a, Pex1, Dapk1, Zranb3, Map4k2, Iars1, Rnf213, Csk, Atl2, Gbp4, Slk, Mapkapk2, Trpm7, Clk1, Mfn2, Pim3, Pck2, Rhoa, Stk25, Cct5, Limk2, Gm43302, Map3k5, Dnah7b, Septin7, Pebp1, Naxd, Atp8a1, Uba5, Cars1, Plk3, Nt5e, Oas3, Tyw1, Dicer1, Ikbke, Stk38, Arf5, Chd3, Pcca, Smc1a, Cnbd2, Prkaa1, Abcc9, Uba2…
12	phosphatidylinositol-mediated signaling	2.20676	Itpr2, Pik3c2a, Plcb1, Cds2, Dgkz, Pik3ca, Inpp5d, Calm1, Pi4ka, Inpp5f, Mtmr2, Pip5k1b, Plcb2, Dgkd, Itpkb
13	Golgi apparatus	2.02504	Pik3c2a, Golga4, Iigp1, Rabgap1l, Creb3l4, Tmbim4, Plcb2, Map4k2, Gnptab, Arsb, Zdhhc17, Chst11, Gbp4, Fcgr3, Tmem43, Stk25, Cux1, Npc1, Syt11, Cog1, Pebp1, Cep85, Atp8a1, Uba5, Arfip2, Acer3, Pja2, Plk3, Tmc6, Man2a1, Mapre1, Arf5, Wipi1, Asah2, Cdk5rap2, Aoc3, Slc10a7, Nod2, Igtp, Csnk1d, Tmed7, Gcnt2, Cog6, Uso1, Lman2, Yif1a, Tmbim1, Rab27b, Copg2, Clec16a, Dnm2, Chsy1, Tmem165, Tnfrsf1a, Nap…
14	protein polyubiquitination	2.00855	Pja2, Ltn1, Fbxo4, Fancl, Itch, Herc4, Brap, Rc3h1, Map3k1, Traf7, Trim65, Trim30a, Pml, Rnf103, Rnf213, Mdm4, Ube2a, Huwe1, Mib1, Ube4a, Ube2k, Ube2d2a, Marchf6, Trim37, Hectd1
15	metal ion binding	1.96258	Rchy1, Nudt16, Dnmt1, Cyp7b1, Ltn1, Csnk2b, Mmp19, Rps27a, Crebbp, Zfp36, Sco1, Ppp2ca, Plcb2, Fbxl5, Gpatch8, Csk, Pck2, Zfa-ps, Zmpste24, Pde8a, Dmrtb1, Kdm7a, Limk2, Patz1, Ngly1, E4f1, Map3k5, Polk, Actn4, Znfx1, Atp8a1, Zfyve27, Uba5, Cars1, Cnot6l, Cyp2b10, Nt5e, Oas3, Abat, Pgrmc1, Padi4, Agrn, Tyw1, Nqo2, Csrp1, Ace, Stk38, Chd3, Rbsn, Eme1, Zfp598, Pold1, Prkaa1, Traf7, Lta4h, Trim30a, P…
16	rRNA processing	1.8344	Gar1, Rps24, Nsa2, Tsr2, Rps6, Krr1, Pdcd11, Dicer1, Ddx21, Rpl7, Fcf1, Emg1, Rps16, Wbp11, Nsun5, Rps27rt
17	AAA+ ATPase domain	1.8314	Atad3a, Abcg4, Dnah5, Rfc4, Gpn1, Orc4, Psmc1, Abcc8, Rfc2, Dnah7b, Pex1, Dnah12, Srp54a, Nav2, Afg3l1, Abcc9, Fignl1, Rnf213
18	Pleckstrin homology-like domain	1.80412	Dnm2, Arhgef6, Frmd4b, Tbc1d1, Trio, Plekha6, Pid1, Ppp4r3b, Rabgap1l, Cnksr2, Mtmr2, Plekhh3, Ptk2, Tbc1d2b, Gab1, Eps8, Farp2, Mcf2, Plekhm1, Prkd3, Sptb, Skap1, Arap3, Fgd1, Ppp4r3a, Akap13, Numb, Shc2, Sptbn1, Gramd1b, Krit1, Gab2, Frmd8, Frmd7, Afap1, Sh2b1, Arhgap10, Epb41l2, Dgkd, Msn
19	endonuclease activity	1.8018	Cnot6l, Slfn8, Dis3l, Slfn14, Dicer1, Cnot6, Apex2, Rnaseh1, Zranb3, Nob1, Eme1, Rnaset2a, Pold1, Apex1, Rnaset2b, Ago2
20	Ubl conjugation pathway	1.77493	Rchy1, Dcun1d2, Ltn1, Fancl, Herc4, Fbxo2, Rnf145, Mindy4, Anapc16, Dnah12, Asb7, Atg4a, Fbxl5, Rnf103, Rnf213, Huwe1, Cdc23, Mib1, Ube4a, Rnf10, E4f1, Marchf6, Trim37, Uba5, Ate1, Cyld, Usp1, Pja2, Crbn, Fbxo4, Rnf114, Itch, Socs4, Klhdc10, Brap, Rnft1, Cdc27, Zfp598, Anapc1, Asb10, Traf7, Uba2, Usp3, Fbxo33, Spopl, Ube2a, Ube2k, Marchf7, Otub2, Ube2q1, Otud6b, Rnf138, Ube2d2a, Tmem129, Hectd1, …
21	Thioredoxin domain	1.74344	Glrx3, Txn2, Prdx1, Pdia5, Sco1, Txndc9, Txndc11, Prdx3
22	Phosphotyrosine interaction domain	1.74122	Shc2, Tbc1d1, Itgb1bp1, Eps8, Pid1, Rabgap1l, Numb
23	Zinc finger, FYVE/PHD-type	1.73048	Kmt2e, Dido1, Brpf3, Brpf1, Ing1, Kdm7a, Baz2b, Nsd1, Chd3, Rbsn, Bptf, Nsd3, Zfyve27, Phf21a
24	chitin catabolic process	1.63139	Chil3, Ctbs, Hexa, Chi3l1, Chil4
25	Methyl-CpG binding domain	1.63139	Mbd6, Mbd5, Mbd2, Baz2b
26	Zinc finger, ZZ-type	1.5806	Ep300, Mib1, Nbr1, Drp2, Crebbp
27	regulation of mRNA stability	1.56755	Zfp36, Ythdf1, Ythdf3, Ddx6, Carhsp1, Pan3, Lsm14a, Trim30a, Psma6, Ago2, Kif5a, Rc3h1
28	cytoskeletal protein binding	1.54937	Krit1, Plekhh3, Frmd4b, Ptk2, Frmd8, Frmd7, Farp2, Epb41l2, Msn
29	methylated histone binding	1.52813	Kmt2e, Bptf, Mbtd1, Cbx3, Cbx7, Ing1, Cbx5, Cbx1, Kdm7a
30	adhesion of symbiont to host	1.51367	Gbp9, Gbp4, Igtp, Il4ra, Nras, Iigp1, Tlr12, Gm43302
31	PIN domain	1.4621	Swt1, Nob1, Fcf1
32	SH3 domain binding	1.42647	Dnm2, Sirpa, Mapt, Dock1, Adam10, Dtx1, Shank2, Afap1, Inpp5d, Sh3bgrl, Reps1, Ptpn22
33	Calponin-homology	1.40549	Specc1, Sptbn1, Arhgef6, Smtn, Sptb, Syne2, Actn4, Nav2, Iqgap1, Gas2l1
34	Proteasome	1.34909	Psmb8, Psme2b, Rad23a, Psmb1, Psmd4, Psme2, Psmc1, Psma6, Psma1
35	Death-like domain	1.32963	Qrich1, Nod2, Tnfrsf1a, Casp2, Ifi214, Mefv, Dapk1, Unc5cl, Ifi209, Card19, Nlrp4b, Ifi203, Bcl10
36	microtubule plus-end	1.2719	Cdk5rap2, Mapre2, Mapre1, Gas2l1
37	nuclear inner membrane	1.26082	Dpy19l1, Nup214, Nemp1, Fam169a, Tmem43, Zmpste24, Lemd2, Arl6ip6, Nup153, Seh1l, Ndc1, Tpr
38	response to unfolded protein	1.25247	Qrich1, Creb3l4, Herpud1, Mfn2, Tmem129, Xbp1, Edem1
39	UBA-like	1.22706	Cuedc1, Dcun1d2, Rad23a, Huwe1, Nbr1, Ubqln4, Ubap2, Ube2k, Vps13d
40	chromosome organization	1.18206	Nudt16, Smc1a, Smchd1, Zmpste24, Smc3
41	RNA degradation	1.15799	Nudt16, Btg2, Cnot6l, Dis3l, Ddx6, Pan3, Cnot6, Btg1, Lsm7
42	Cell cycle	1.14461	Rgs2, Haus8, Septin9, Urgcp, Hjurp, Anapc16, Entr1, Pds5b, Seh1l, Cacul1, Ikzf1, Ccnd2, Pim3, Cdc23, Ccng2, Rhoa, Stag2, Rack1, Smc3, Apex2, Tpr, Cdca2, E4f1, Anxa11, Cdc45, Rb1cc1, Septin7, Chmp3, Ep300, Plk3, Gadd45gip1, Zw10, Mapre1, Cdc27, Smc1a, Mau2, Prkaa1, Anapc1, Hmga2, Usp3, Kmt2e, Mapre2, Ing1, Tpx2, Gnai3, Cdk6, Epb41l2, Mrpl41, Snx33
43	Cx9C motif 1	1.11064	Ndufaf8, Chchd2, Ndufa8, Triap1
44	Bromodomain, conserved site	1.10267	Ep300, Bptf, Brpf3, Brpf1, Baz2b, Crebbp
45	small RNA loading onto RISC	1.09338	Adar, Dicer1, Ago2, Dhx9
46	Sushi/SCR/CCP	1.08841	Il15ra, Cr2, Pappa, Csmd1, Cfh
47	mRNA processing	1.06394	Ptbp1, Cnot6l, A1cf, Pus7, Syf2, Adar, Adarb1, Zc3h13, Cd2bp2, Gemin8, Rbm22, Gemin5, Cdc40, Akap17b, Sart3, Lsm7, Plcb1, Ppp4r2, Hnrnpll, Ncbp1, Pan3, Pdcd11, Cenatac, BC005624, Snrnp27, Rbm39, Dhx9, Hnrnpa1, Rbm26, Sf3a1, Sugp2, Hspa8, Wbp11, Ddx5, Khdc4
48	autophagosome assembly	1.04585	Atg16l2, Rab43, Wdr45, Igtp, Rb1cc1, Trp53inp1, Atg4a, Gabarap, Wipi1
49	Carbon metabolism	1.0243	Pdha1, Cs, Pcca, Sds, Acat3, 4933405O20Rik, Dlat, Me1, Pgam1, Glud1, Rpia

## Sheet: Cluster 4
DAVID functional clustering of genes in cluster 4 of platelet transcriptome of TMEV-infected mice
Cluster #	Pathway	Enrichment Score	Gene IDs
1	Ubl conjugation	8.62191	Rbbp7, Map3k2, Cope, Epas1, Llph, Coro1a, Coro7, Ankrd17, Srsf1, E130308A19Rik, Odf2, Tcerg1, Brca2, Src, Cdk9, Rusc1, Anks3, H4c12, Zmiz1, Cbfa2t2, Atrx, Adnp2, Cbx4, Zfp280d, Fosl2, Rpl26, Scn8a, Rsl1d1, Mdh1, Trim25, Uba1, Ogt, Rela, Insig1, Mak16, Arnt, Rps4x, Smad1, Megf10, Ssrp1, Supt5, Vps50, Atf1, Stat2, Kat6b, Gtf2i, H4c11, Rmi1, Gtf3c1, Akt3, Pcbp2, Smarcc1, Flnb, Fbh1, Papola, H4c3, Cr…
2	protein domain specific binding	4.52854	Ran, Ezr, H4c17, Ncoa2, H4c3, St13, H4c1, H4c18, H4c4, Ogt, H4c2, Zmynd8, Ywhae, Ctnnd1, Unc13a, Chmp1b2, Srsf7, H4c8, Strn, Cabp1, Src, H4c12, Tuba1a, H4c11, Ski, H4c6, Trps1
3	Transport	4.20044	Ran, Magt1, Cope, Cep41, Bbs4, Fabp5, Dnajc14, Vps33a, Slc35b3, Slc28a3, Slc16a7, Rims1, Ero1a, Atp6v0a2, Snap91, Mup6, Slc25a36, Coro7, Trpc6, Srsf1, Clcn7, Gabrq, Snx17, Srsf7, Ehd1, Slc38a1, Osbpl3, Spire1, Slc7a4, Relch, Grin2c, P2rx6, Trpc1, Nxt1, Asic4, Tnpo3, Scn8a, Pex13, Tram1l1, Dtx3l, Arl4c, Pitpna, Atp13a2, Vamp8, Letm1, C330018D20Rik, Gabra5, Arcn1, Kcnq5, Abcg2, Slc39a13, Rab23, Osb…
4	Nucleotide-binding	3.36056	Hars1, Ran, Map3k2, Tgfbr2, Atad2, Hprt1, Tars1, Entpd4, Eif4a2, Irak3, Helb, Map2k1, Rtca, Dgkq, Tep1, Gimap9, Pak5, Clcn7, Atm, Map2k5, Ehd1, Prkag1, Hspd1, Src, Cdk9, P2rx6, Prkcd, Atrx, Map2k2, Smg1, Recql, Csnk1g1, Pdk1, Scn8a, Dcaf1, Dapk2, Rab40c, Map4k3, Entpd4b, Cct8, Arl4c, Btaf1, Dgke, Uba1, Cdk19, Helz, Cdk5, Dars2, Mapk8, Atp13a2, Rars2, Cdk10, Ruvbl1, Ube2d3, Abcg2, Rab23, Met, Cenp…
5	Pleckstrin homology-like domain	2.84432	Ezr, Frmd3, Spred1, Dock11, Plekha3, Arhgap15, Grb14, Plekha7, Arhgap9, Tec, Nbea, Fgd4, Dok1, Rasal2, Apbb1, Mtmr7, Ldlrap1, Plekho1, Gramd4, Snx17, Arhgef5, Plekha5, Sntb2, Ssrp1, Arhgef18, Osbpl10, Evl, Phlda3, Tbc1d4, App, Prkd1, Sharpin, Osbpl3, Grk2, Cyth1, Sbf2, Plcg2, Prex1, Iqsec1, Akt3, Arhgef15
6	microtubule	2.74881	Map1a, Knstrn, Spast, Incenp, Cct8, Ncoa2, Eml1, Gas2l2, Cdk5, Kif1c, Emd, Map2k1, Tpgs1, Tubgcp6, Tuba1c, Prc1, Pycard, Kif5b, Sntb2, Clip1, Dst, Ttll9, Odf2, Golga2, Katnal2, Cenpe, Tuba1b, Nin, Kif17, Kif21b, Reep3, Rusc1, Ccdc66, Tuba1a, Map2k2, Rassf1
7	WD40/YVTN repeat-like-containing domain	2.32114	Fbxw17, Rbbp7, Gnb2, Dcaf1, Ciao1, Eml1, Nbea, Coro1a, Tep1, Coro7, Strap, Ift122, Dcaf12, Plaa, Strn, Met, Fbxw13, Arpc1a, Kif21b, Wdr77, Dcaf11, Fzr1, Wdr82, Wdr35, Wdr62, Wdpcp, Eif2ak3, Apaf1, Wdtc1, Sec31a
8	Src homology-3 domain	2.14077	Crkl, Rimbp2, Arhgef5, Fchsd2, Ubash3b, Mpp3, Dst, Pex13, Sla, Src, Arhgap9, Tec, Rusc1, Ostf1, Hcls1, Sh3kbp1, Pacsin1, Sptan1, Plcg2, Yes1, Ncf1, Fchsd1
9	ubiquitin-dependent protein catabolic process	1.9956	Usp21, Usp28, Rc3h2, Fbxo7, Tollip, Nedd4l, Dtx3l, Usp33, Trim25, Rnf144a, Uba1, Cdc34, Psmf1, Fem1c, Trpc4ap, Usp11, Ube2d3, Klhl15, Cul5, Wdr77, Rnf130, Usp31, Spsb4, Usp32, Usp36, Usp10, Usp4, Ubqln2, Usp13
10	Sushi/SCR/CCP	1.882	Masp1, Selp, Csmd2, Sell, Cd55b, Svep1, Susd3, Cd55, Susd4
11	ligase activity	1.84889	Hars1, Dph6, Uba3, Ttll9, Tars1, Nars1, Trim25, Uba1, Eprs1, Dars2, Mccc1, Rtca, Mthfs, Kars1, Rars2
12	Pathways of neurodegeneration - multiple diseases	1.84692	Zfyve1, Grm1, Ndufa11, Gria4, Ndufa12, Sdha, Uba1, Rab1a, Cdk5, Rela, Map2k1, Mapk8, Ppp3cb, Psmc4, Dctn5, Tuba1c, Lrp6, Bcl2, Kif5b, Cox5b, Psmb4, Bid, App, Nefh, Htt, Tuba1b, Rab8a, Ndufv3, Atg2b, Ddit3, Ndufa7, Atp5f1a, Grin2c, Tuba1a, Csnk2a1, Atxn2l, Eif2ak3, Apaf1, Map2k2, Rab5a
13	cell cycle	1.57603	Ran, Knstrn, Uba3, Stag3, Spast, Rassf4, Incenp, Wtap, Ythdf2, Son, Klhdc8b, Cdc34, Fancd2, Cgrrf1, E2f3, Prc1, Specc1l, Atm, Ndc80, Brca2, Src, Knl1, Reep3, Stard13, Prkcd, Cib1, Rassf1, Mcmbp, Mcm7, Stk11, Cdk5, Ccng1, Pdcd6ip, Septin6, Cdkn1b, Ruvbl1, Chmp1b2, Cenpw, Septin1, Clta, Golga2, Hells, Cdkn1a, Cenpe, Fzr1, Zfyve26, Ddit3, Tnks, Csnk2a1, Ccnb2
14	Ras-associating	1.55295	Snx17, Dgkq, Rassf4, Rapgef6, Grb14, Rassf10, Rassf1
15	Transcription	1.4943	Nfatc1, Trim33, Rbbp7, Atad2, Epas1, Sfswap, Hbp1, Hnf1a, Zfp536, Nfe2l3, Zfp513, Elf2, Zbed6, Rfxank, Ctnnd1, E2f3, Gabpb1, Tcerg1, C1d, Smad5, Hdac7, Cdk9, Scml4, Zmiz1, Cbfa2t2, Sra1, Adnp2, Atrx, Cbx4, Zfp280d, Fosl2, Ppargc1b, Dcaf1, Zfp710, Srsf5, Ctr9, Apbb1, Rela, Gpbp1l1, Arid4b, Prdm15, Arnt, Ruvbl1, St18, Jarid2, Ssrp1, Smad1, Cnot10, Zbtb46, Supt5, Runx3, Gcm2, Zc3h4, Mxd3, Hivep1, At…
16	ANK	1.48661	Gabpb1, Fem1b, Ripk4, Ankrd44, Abtb1, Ankrd13b, Ankrd46, Tnni3k, Ostf1, Asb6, Anks3, Notch1, Lrrk1, Trpc1, Tnks, Rfxank, Ehmt1, Fem1c, Kidins220, Ankrd17, Trpc6
17	ATPase activity	1.48217	Recql, Mcm7, Xrcc5, Ddx39a, Atad2, Spast, Fbh1, Tor2a, Abca4, Ddx54, Cct8, Btaf1, Eif4a2, Aqr, Hfm1, Kif1c, Helb, Psmc4, Atp13a2, Ruvbl1, Kif5b, Myh8, Hspa2, Nlrp3, Abcc1, Hspd1, Katnal2, Kif17, Kif21b, Atp4a, Atp9a, Atp5f1a, Chd8, Atrx
18	KOW	1.47479	Rps4x, Rpl26, Supt5, Rpl27
19	actin binding	1.42963	Ezr, Map1a, Msrb2, Jmy, Flnb, Twf2, Tmod1, Fgd4, Emd, Coro1a, Tlnrd1, Cyfip1, Coro7, Trpc6, Pxk, Myh8, Sntb2, Tmod3, Dst, Evl, Mtss1, Arpc1a, Spire1, Rusc1, Hcls1, Phactr4, Vcl, Sptan1, Capza2
20	nuclear speck	1.40412	Api5, Nsrp1, Ddx39a, Ilrun, Wac, Epas1, Il16, Wtap, Grk5, Fam193b, Hbp1, Srsf5, Son, Ctr9, Apbb1, Srrm1, Cdc34, Dgkq, Cops4, Slu7, Eftud2, Srsf1, Rsrc1, Tfip11, Srsf7, Srpk1, Ep400, Hp1bp3, Nampt, Srsf4, Cwc25, Usp36, Nxt1, Atxn2l, Cbx4, Srsf11, Snrpa1
21	nuclear inner membrane	1.40077	Tmpo, Nemp2, Lbr, Kcnh1, Emd, Smad1, Lemd3, Tor1aip1, Nup88
22	EGF-like domain	1.39351	Itgb7, Adam18, Selp, Nrg4, Pgap6, Pear1, Megf10, Adam28, Sell, Egf, Svep1, Hspg2, Fbn2, Masp1, Notch1, Reln, Thbs4, Cntnap5c, Slit2, Scarf2, Lrp6
23	LXXLL motif 1	1.39045	Ppargc1b, Kmt2d, Dgkq, Asxl1, Ncoa2
24	Hepatitis B	1.37177	Nfatc1, Tgfbr2, Fos, Nfatc2, Bid, Hspg2, Cdkn1a, Src, Creb1, Stat2, Rela, Mapk8, Map2k1, Apaf1, E2f3, Map2k2, Akt3, Bcl2
25	Zinc finger, FYVE-related	1.33665	Rims1, Fgd4, Zfyve26, Rufy2, Zfyve1, Mtmr3
26	aortic valve morphogenesis	1.31105	Nfatc1, Notch1, Eln, Tgfbr2, Slit2, Robo2
27	NADP binding	1.27614	Glyr1, Cryz, Fmo5, Pgd, Hibadh
28	G4	1.24403	Gimap8, Eif5b, Gimap9, Hbs1l
29	AGC-kinase C-terminal	1.23602	Grk2, Pkn1, Rps6ka5, Prkcd, Grk5, Rps6ka2, Akt3
30	Zinc finger, FYVE/PHD-type	1.2255	Trim33, Rufy2, Zfyve1, Kmt2d, Ints12, Jade2, Spire1, Rims1, Zfyve26, Kat6b, Phf14, Zmynd8, Phf20, Atrx, Mtmr3, Kdm2a, Rsf1
31	SSXRD motif	1.16936	Ssxb2, Ssxb15, Ssxb9, Ssxb1
32	GTP binding	1.11387	Ran, Eif5b, Rab40c, Arl9, Rab35, Arl4c, Rab1a, Gimap9, Eftud2, Tuba1c, Septin6, Rab12, Ehd1, Septin1, Rab23, Tuba1b, Nin, Rab28, Rab8a, Gimap8, Diras2, Lrrk1, Tuba1a, Rap2c, Hbs1l, Arf3, Rab5a
33	exocytosis	1.10655	Exoc2, Rims1, Unc13a, Cdk5, Arfgef2, Exoc3, Exoc5
34	histone H4-K5 acetylation	1.09965	Ogt, Phf20, Kansl1, Jade2
35	cellular response to DNA damage stimulus	1.08748	Usp28, Mcm7, Xrcc5, Wac, Jmy, Fbh1, Eya3, Rpa2, Stk11, Dtx3l, Uba1, Cdk5, Apbb1, Helb, Fancd2, Bcl2, Ruvbl1, Atm, Armt1, Ssrp1, Ube2d3, Spindoc, Nfatc2, Cdkn1a, Brca2, Dclre1b, Cdk9, Fzr1, Zfyve26, Hsf1, Usp10, Setd2, Prkcd, Cib1, Atrx, Emsy, Smg1, Rassf1
36	GTPase activator activity	1.07511	Tagap1, Smap2, Thy1, Arhgap19, Tagap, Rasal3, Chm, Rap1gds1, Tbc1d4, Arhgap15, Arhgap9, Tbc1d10c, Nckap1l, Sh3bp1, Sec23b, Rasal2, Stard13, Tbc1d14, Arhgap17, Prex1, Arhgef15
37	Death-like domain	1.07314	Pycard, Ifi213, Ifi206, Nlrp9a, Irak3, Nlrp3, Apaf1, Nlrp12
38	lysosome	1.03036	Tpcn1, Pgap6, Vps33a, Gaa, Dtx3l, Tlr7, Fnip1, Atp13a2, Bloc1s2, Vamp8, Akr1b10, Clcn7, Kif5b, Ids, Idua, Rab12, App, Snx6, Ctso, Ncstn, Vps26a, Dram2, Src, Vti1b, Zfyve26, Epg5, Vps39, Tpp1, Ubxn6, Ggh
39	PIK-related kinase	1.01951	Atm, Trrap, Smg1
40	SH3 1	1.01617	Crkl, Rimbp2, Sh3kbp1, Fchsd2, Ncf1, Fchsd1
41	Human immunodeficiency virus 1 infection	1.00952	Crkl, Nfatc1, Atm, Cul5, Gnb2, Fos, Dcaf1, Nfatc2, Bid, Rela, Mapk8, Map2k1, Ppp3cb, H2-M3, Plcg2, Ccnb2, Pak5, Map2k2, Ap1s2, Akt3, Bcl2
42	clathrin-coated pit	1.00555	Fchsd2, Fcho1, Snap91, Clta, Hspd1, App, Rab35, Ap1s2

## Sheet: Cluster 5
DAVID functional clustering of genes in cluster 5 of platelet transcriptome of TMEV-infected mice
Cluster #	Pathway	Enrichment Score	Gene IDs
1	Glycoprotein	20.3445	Gabrg1, Gdf11, Ptgis, Gprc6a, Pebp4, Itgb2, Rdh5, Npff, Cd164l2, Il12a, Glb1l, Nfasc, Tff2, Angptl7, Col9a2, Lman2l, Ghrhr, Epo, Ptprn, Ccn5, Pla2g2f, Tmed6, Fgf21, Ptn, Pcolce, Chrd, Svs4, Ccl4, Matn4, Iglon5, Fgf23, Prr27, Fgf6, Scart1, Cort, Nptx1, Il10, Tnfrsf10b, Ghrh, Pdyn, Pi16, Igfbp6, Slc22a17, Car6, Abca13, Sva, Nop56, Amhr2, Prap1, Tslp, Tyrp1, Tmt1b, Tmem59, Cpxm1, Mrpl32, Tas1r2, Wnt…
2	multicellular organism development	10.952	Spata18, Nes, Evx1, Robo1, Lrig3, Hoxd12, Chrd, Sfrp4, Twist2, Nanog, Rfx6, Angpt2, Arid3b, Fgf6, Tdrd12, Six2, Srpk3, Arhgef2, Msx3, Tlk2, Pax7, Casz1, Trp63, Vangl2, Wnt1, Pitx3, Wif1, Wnt8a, Sfrp5, Figla, Ereg, Dlx2, Gsc, Sfrp2, 4930447C04Rik, Six6, Pax3, Lbx1, Pkdcc, Vegfa, Prm1, Fstl3, Fgf8, Dkk2, Epha5, Tek, Lhx6, Tssk4, Fzd6, Pax9, Evx2, Sema4g, Spmap2, Vax1, Gdf3, Pou4f2, Sema3c, Tbx2, Tb…
3	Cytokine-cytokine receptor interaction	6.80815	Il12b, Il34, Ccl20, Gdf11, Il11, Il12a, Acvrl1, Il13, Acvr1b, Epo, Il27ra, Bmpr1a, Il31, Ngf, Thpo, Ccl1, Ifnar1, Bmp4, Fasl, Ccl4, Il1r2, Il1r1, Il10, Ccl17, Tnfrsf10b, Il23a, Il17b, Prl, Acvr1c, Amhr2, Tslp, Il13ra1, Gdf10, Cxcl14, Ltbr, Il2rg, Cxcl15, Ccr9, Bmp10, Il1b, Csf2, Ppbp, Mstn, Cxcl9, Edar, Il1a, Cxcl13, Il1rl1, Il24, Bmp7, Ccl25, Lta, Bmp3, Bmp15, Il12rb1, Tnfsf4, Cd70, Il20ra, Il9,…
4	RNA polymerase II transcription factor activity, sequence-specific DNA binding	6.45649	Dmrtc2, Etv2, Arnt2, Hoxb6, E2f1, E2f4, Hoxc5, Hoxc10, Creb3, Evx1, Gcm1, Hoxc6, Zfp251, Myb, Hoxd12, Twist2, Zfp263, Nanog, Mesp1, Rfx6, Pbx4, Trp73, Barx2, Elf3, Barx1, Pou4f3, Six2, Zfy2, Msx3, Pax7, Casz1, Nfkb2, Trp63, Zfp184, Sox17, Zfp354b, Pitx3, Gata4, Bhlhe41, Isx, Figla, Irf5, Cic, Zfp108, Klf15, Pax2, Dlx2, Creb3l1, Gsc, Spic, Npas3, Six6, Pax3, Lbx1, Esrrb, Foxn1, Zbtb43, Myc, Ascl2,…
5	regulation of cell migration	3.50636	Plxna3, Smarca4, Fgf15, Plxna1, Fgf3, Kif2a, Tff2, Dpysl3, Egfl7, Fgf17, Frmd5, Fgf10, Fgf8, Tnn, Fgf22, Fgf21, Fgf23, Fgf6, Tbccd1, Tek, Cort, Fgf7, Sst, Ajuba, Tmigd1, Fgf20
6	RNA polymerase II transcription factor activity, ligand-activated sequence-specific DNA binding	3.271	Nr2f2, Ppard, Ppara, Nr5a2, Esr2, Nr1i3, Esrrb, Rarg, Nr1d2, Vdr, Esrra, Thrb, Nr1h3, Rarb, Nr3c2, Rxrg, Nr1i2, Hnf4g
7	Ion transport	3.25321	Gabrg1, Slc5a2, Slc30a3, Ano1, Lrrc38, Scn1b, Lrrc26, Slc22a22, Scnn1g, Slc8a2, Hcn3, Abcb8, Slc22a17, Atp7b, Trpc7, Slc22a4, Cp, Kcnk7, Cnga4, Mcu, Kcnn3, Prss30, Atp6v0c, Slc4a9, Lcn2, Atp6v1g2, Slc10a1, Slc5a5, Slc22a18, Catsper3, Cacng1, Kcnj3, Cacng4, Kcnab3, Slc5a11, Chrna7, Kcnj8, Kcnu1, Slc13a2, Gabra1, Chrng, Chrnd, Slc23a1, Cacna1h, Slc12a2, Kcnk16, Slc30a2, Trpc4, Clic3, Atp6v1e1, Slc2…
8	anchored component of membrane	3.23988	Efna4, Lypd5, Ly6g, Cpm, Prss30, Gfra3, Lypd1, Cfc1, Ly6i, Prnd, Efna1, Mmp17, Hyal5, Gfra4, Nt5el, Bst1, Lypd8, Reck, Efna2, Treh, Spam1, Zfand2b, Gfra1, Lynx1, Prss21, Prss41, Psca, Gpihbp1, Dpep1, Car4, Art1
9	Mitochondrion	2.90377	Uox, Spata18, Sdhd, Casq1, Slc25a33, Mrpl37, Gfm1, Slc29a3, Pnpt1, Cyp2e1, Agtpbp1, Arl2, Plscr3, Bik, Ttc5, Abcb8, Eci1, Fars2, Tchp, Ndufs3, Slc22a4, Surf1, Mrpl32, Slc25a45, Timm13, Star, Mcu, Casp8ap2, Hsd3b1, Gatm, Lrpprc, Timm10, Echdc2, Oxct1, Malsu1, Hap1, Cabs1, Eci2, Polrmt, Bckdk, Mief2, Fmc1, Mrpl52, Yme1l1, Hadh, Cyp2u1, Slc30a2, Mapk12, Ndufb8, Twnk, Fastk, Prkn, Fkbp4, Lias, Acsl4,…
10	Wnt signaling pathway	2.8121	Tgfb1i1, Dixdc1, Sfrp2, Calcoco1, Wnt10a, Ctnnbip1, Wnt5a, Dkk1, Dvl2, Nxn, Pias4, Sfrp4, Dkk4, Dkk2, Brd7, Reck, Rspo1, Ccdc88c, Wnt7a, Klhl12, Wnt2b, Wnt3, Frzb, Wnt9a, Fzd6, Csnk1a1, Apc2, Wnt1, Sox17, Nkd2, Tnks2, Wif1, Wnt8a, Dvl1, Sfrp1, Sfrp5, Porcn
11	MAPK signaling pathway	2.81023	Fgf15, Fgf3, Tgfa, Prkaca, Map3k6, Ngf, Cacna1s, Map3k3, Fgf21, Ins2, Fasl, Kit, Fgf23, Angpt2, Fgf6, Il1r1, Mecom, Dusp9, Mapk13, Vegfd, Fgf7, Artn, Nfkb2, Rps6ka6, Pdgfc, Ptpn7, Ptpn5, Cacnb4, Pak1, Dusp4, Fgfr4, Ereg, Areg, Efna4, Ppp3ca, Il1b, Hras, Gdnf, Il1a, Fgf17, Traf2, Efna1, Myc, Vegfa, Fgf10, Cacng1, Fgf8, Fgf22, Cacng4, Cacnb3, Tek, Hspa1l, Efna2, Ppp3r2, Map3k20, Cacna1h, Pspn, Mapk…
12	positive regulation of pathway-restricted SMAD protein phosphorylation	2.65558	Bmp5, Bmp10, Gdf11, Mstn, Twsg1, Acvrl1, Acvr1b, Bmp7, Bmp3, Bmp15, Bmpr1a, Lgals9, Inhbc, Gdf10, Bmp4, Gdf3, Gdf9
13	endoplasmic reticulum	2.64037	Casq1, Yipf7, Ahcyl1, Slc27a5, Ptgis, Rdh5, Cwh43, Pigf, Dnajb2, Agr2, Lman2l, Cyp2e1, Grm6, Plaat1, Tmed6, Aldh3a1, Ptn, Sdf2l1, Gdpd3, Awat1, Rpe65, Thada, Aadac, Nptx1, Hsd17b7, Cyp39a1, Prap1, Tmem30c, Tmt1b, Adipoq, Jsrp1, Dus2, Rbmx2, Slc43a1, Clec2h, Hsd17b12, Hsd3b1, Ext2, Cant1, Ptgds, Samd8, Gramd1a, Hap1, Trappc3, Nkiras1, Pck1, Arsa, Vegfa, Derl3, Hmgcll1, Nat8, Stx18, Serpina1f, Ptgf…
14	rRNA processing	2.63736	Rpusd4, Nop10, Frg1, Ddx56, Rpf1, Pwp1, Dcaf13, Rrp36, Wdr75, Brix1, Nol11, Rpp40, Rrp8, Pop4, Ddx47, Tsr3, Tfb2m, Ppan, Naf1, Rbfa, Nol6, Mterf4, Ddx51, Exosc7, Pa2g4, Nhp2, Utp23, Bop1, Nvl, Mrm1, Dkc1, Mphosph6, Pelp1
15	DEP domain	2.60617	Depdc1a, Depdc7, Plek2, Rgs7, Dvl2, Rgs6, Rgs11, Dvl1, Depdc1b
16	Transcription	2.60158	Taf6l, Zfp511, Med8, Pmf1, Calcoco1, Xab2, Aire, Med29, Ptprn, Hoxd12, Twist2, Zfp263, Nanog, Rfx6, Depdc1a, Arid3b, Trp73, Pou4f3, Polr2e, Hdac4, Msx3, Pax7, Casz1, Nfkb2, Tchp, Trp63, Bnc1, Zfp184, Sox17, Yaf2, Zfp354b, Pitx3, Rbbp5, Chmp1a, Bhlhe41, Figla, Casp8ap2, Dlx2, Lrpprc, Dmap1, Ikzf4, Zfp593, Pax3, Polr1f, Lbx1, Zbtb43, Nr1d2, Fstl3, Brca1, Ovol1, Thrb, Polrmt, Lcorl, Coprs, Tead4, Ae…
17	Breast cancer	2.30571	E2f1, Fgf15, Fgf3, Dll4, Hras, Wnt10a, Esr2, Fgf17, Myc, Wnt5a, Fgf10, Brca1, Fgf8, Dvl2, Fgf22, Fgf21, Notch4, Pik3r2, Kit, Fgf23, Fgf6, Wnt7a, Wnt2b, Wnt3, Wnt9a, Fzd6, Igf1r, Fgf7, Nfkb2, Csnk1a1, Bax, Rps6kb2, Apc2, Wnt1, Wnt8a, Dvl1, Fgf20
18	LIM domain	2.28638	Prickle3, Lhx5, Tgfb1i1, Fhl2, Lims2, Nol6, Lhx6, Xirp2, Crip1, Fblim1, Fhl5, Lhx2, Csrp2, Ajuba, Crip2, Trip6, Ldb3, Lhx3, Crip3
19	Fibrinogen, alpha/beta/gamma chain, C-terminal globular, subdomain 1	2.26491	Angpt2, Fgl1, Fcnb, Tnn, Angptl3, Fga, Fibcd1, Angptl2, Angptl7, Angptl4
20	proteolysis	2.22551	Cpm, Mmp16, Usp40, Mmp17, Agtpbp1, Dnpep, H13, Pcolce, Usp43, St14, Furin, Stambpl1, Sva, Casp14, Mmp11, Dpp7, Fcnb, Plau, Gzmb, Sprtn, Sval2, Adam15, Htra3, Rhbdd1, Ihh, F12, Nrip2, Scpep1, Prss30, Cela3b, Adam21, Senp3, Vash1, Mcpt1, Afg3l2, Endou, Mcpt2, Cpd, Acr, Rhbdl1, Otub1, Hpn, Prss8, Prss3b, Usp12, F7, Yme1l1, Adam7, Prss21, Adamdec1, Prss41, Ctsw, Tmprss15, Klk4, Hp, Proz, Kdm8, Adam3,…
21	Caspase-activated nuclease CIDE-N	2.20984	Cidea, Cideb, Dffa, Dffb, Cidec
22	Cushing syndrome	2.09841	Star, E2f1, Hsd3b1, Creb3l1, Nceh1, Wnt10a, Prkaca, Adcy4, Creb3, Pomc, Wnt5a, Cacna1s, Adcy2, Dvl2, Itpr1, Crhr1, Agt, Cacna1h, Cyp17a1, Wnt7a, Wnt2b, Wnt3, Wnt9a, Fzd6, Adcy8, Apc2, Wnt1, Camk2g, Rbbp5, Wnt8a, Camk2a, Dvl1
23	sodium ion transport	2.06314	Scnn1a, Slc5a2, Slc9a4, Scn1b, Prss30, Slc10a4, Slc4a9, Slc10a1, Asic1, Slc5a5, Catsper3, Asic5, Slc17a1, Slc17a4, Slc5a4b, Trpm2, Scnn1g, Asic2, Slc13a5, Slc5a11, Chp2, Slc34a2, Slc13a2, Slc8a2, Hcn3, Slc23a1, Slc12a2, Slc12a1, Slc22a4, Slc38a3, Atp4b, Slc6a8, Slc12a3
24	Charge relay system	2.01519	Uox, Prss16, Htra3, F12, Abhd1, Prss30, Prss12, Cela3b, Mcpt1, Elane, Mcpt2, Acr, Lipf, Gzmf, Hpn, Ctrb1, Lpl, Prss8, Acot8, St14, Lypla2, Abhd8, Prss28, F7, Furin, Hgfac, Tpsab1, Lipn, Tmprss3, Pcsk4, Lipk, Mcpt8, Prss21, Prss41, Dpp7, Acot3, Plau, Tmprss15, Pla1a, Klk4, Klk7, Gzmb, Pnliprp2, F11
25	steroid biosynthetic process	1.98015	Star, Hsd17b12, Hsd17b11, Hint2, Cyp27a1, Hsd3b1, Scp2d1, Pmvk, Hsd17b7, Cyp17a1, Mvd, Tm7sf2, Idi2l, Idi2l, Hsd17b1, Akr1c21, Hsd17b2, Sc5d
26	digestive tract morphogenesis	1.94489	Trp73, Hif1a, Ephb3, Sfrp2, Agr2, Cfc1, Sfrp1, Sfrp5, Vangl2, Wnt5a
27	Peroxisome	1.90248	Acsl4, Pex11b, Pex3, Ephx2, Pmvk, Pecr, Xdh, Crot, Amacr, Pex7, Hmgcll1, Eci3, Eci2, Nos2, Acot8, Pex11a, Acaa1b, Pex10, Pex16, Abcd4, Dhrs4, Paox, Mpv17l, Pipox, Nudt13
28	non-canonical Wnt signaling pathway	1.90055	Dvl2, Ccdc88c, Sfrp4, Sfrp2, Wnt7a, Frzb, Fzd6, Sfrp1, Ift80, Sfrp5, Vangl2, Wnt5a
29	negative regulation of endothelial cell proliferation	1.86766	Nr2f2, Prl4a1, Tnmd, Acvrl1, Xdh, Apoe, Prl, Cnmd, Alox5, Prl7a1, Vash1, Prl8a6, Rgcc, Prl8a8, Prl2a1, S2bpcox16, Ager, Prl5a1, Prl3c1, Prl8a9
30	Helical; Name=8	1.80765	Abcc2, Slc2a2, Slc6a9, Slc2a10, Slc2a8, Slc46a2, Slc6a20b, Slc45a2, Slc22a22, Dgat1, Slc2a5, Soat1, Slc22a4, Npc1l1, Tap2, Slc19a1, Slc6a13, Abcc6, Slc2a4, Slco1a4, Atp2a1
31	calmodulin binding	1.61006	Mylk2, Ndufaf4, Cask, Ppp3ca, Myo1e, Smtnl1, Itpka, Kcnn3, Akap5, Pde1b, Epb41, Camkk1, Cacna1s, Spa17, Rem1, Nos2, Atp2b1, Myh3, Slc8a2, Pate4, Nos1, Mip, Snta1, Kcnq4, Enkur, Ngfr, Adcy8, Myo1a, Adora2a, Itpkc, Camk2g, Camk2a, Tjp1, Kcnn1
32	CUB domain	1.60798	Sez6l2, Bmp1, Sez6, Cdcp3, Nrp1, Pdgfc, Cubn, Lrp12, Tmprss15, Pcolce, Lrp3, Pcolce2, St14
33	sympathetic nervous system development	1.57338	Tfap2a, Ednra, Phox2a, Gfra3, Gdnf, Nrp1, Phox2b, Trp63
34	cobalamin metabolic process	1.56811	Mmachc, Cd320, Abcd4, Cblif, Mmadhc, Mtr
35	sarcoplasmic reticulum	1.55585	Casq1, Nos1, Tmem38a, Xdh, Hax1, Camk2g, Cacna1s, Jsrp1, Car4, Dmpk, Srl, Nol3, Rtn2, Slc2a4, Mrln, Art1, Itpr1, Atp2a1
36	cilium	1.53886	Pgk2, Scnn1a, Prom2, Tmem218, Dydc1, Prkaca, Tppp2, Tmem138, Htr6, Ift80, Drd1, Rsph14, Spa17, Cfap126, Spaca9, Lyzl6, Nek8, Cfap52, Cabcoco1, Tmem231, Npffr1, Ccdc34, Tekt4, Spef1, Pdc, Enkur, Ropn1l, Csnk1a1, Ptch1, Calcr, Arl13b, Rsph3b, Kif19a, Rilpl1, Tub, Ldhc, Drc7, Adam15, Rpgr, Rab34, Esr2, Ajm1, Npy2r, Ift43, Ttc8, Septin4, Smo, Catsper3, Cimip1, Cabs1, Gpr83, Stard10, Evc, Ttll3, Cfap2…
37	metallopeptidase activity	1.51644	Clca3a2, Adam3, Mmp21, Adam15, Mmp15, Enpep, Pitrm1, Cpm, Mmp16, Adam21, Mmp17, Afg3l2, Cpd, Agtpbp1, Dnpep, Mmp23, Adam5, Adam9, Mme, Yme1l1, Bmp1, Adamts10, Adam7, Stambpl1, Adamts5, Adamdec1, Mep1b, Mmp11, Cpxm1, Mmp20, Dpep1, Sprtn, Mmp7
38	ephrin receptor signaling pathway	1.51121	Git1, Epha5, Efna4, Efnb3, Efna2, Ephb3, Efnb2, Epha4, Efna1
39	BRICHOS	1.49553	Gkn1, Tnmd, Sftpc, Cnmd, Gkn2
40	transmembrane transporter activity	1.48367	Slc43a1, Slc2a2, Slc5a2, Slc46a2, Mfsd10, Sfxn2, Mfsd1, Slc45a2, Slc4a9, Slc22a22, Slc22a18, Slc5a5, Slc23a3, Slc17a1, Slc35f4, Mfsd8, Slc17a4, Slc5a4b, Slc7a7, Slc13a5, Slc5a11, Ucp1, Slc37a4, Slc13a2, Slc16a3, Slc7a10, Slc2a10, Slc2a8, Slc23a1, Slc12a2, Slc12a1, Slc22a17, Slc22a6, Mfsd3, Slc2a5, Slc22a4, Slc15a3, Spns3, Slc25a45, Slc7a6, Slc22a1, Slc12a3, Slco1a4, Slc2a4, Slc47a1
41	membrane	1.47448	Gabrg1, Sdhd, Ahcyl1, Slc25a33, Pigf, Adgra1, Htr6, Cyp2e1, Pla2g2f, Tmed6, Ptn, Bik, Awat1, Stxbp3, Slc3a1, Abcb1b, Slc2a8, Stxbp1, Abcb8, Slc22a17, Amhr2, Gsdme, Slc2a5, Vangl2, Tas1r2, Tmem213, Slc7a6, Ramp2, Hsd3b1, Lrpprc, Itgb2l, Prss30, Gfra3, Lsr, Atp6v0c, Igsf5, Gramd1a, Fcgrt, Slc22a18, Rab17, Hpn, Prss8, Slc23a1, Yme1l1, Ptgfrn, Cacna1h, Slc12a2, Cers5, Rapsn, Frs3, Cyp4a14, Prss21, Aj…
42	Acyl-thioester intermediate	1.41794	Acat1, Plaat1, Lrat, Lipt2, Plaat5, Acaa1b
43	Histidine triad motif	1.41178	Hint2, Hint3, Aptx, Hint1
44	positive regulation of renal sodium excretion	1.37168	Tacr1, Agt, Drd3, Oxt, Adora2a, Avpr1a, Edn1, Nppb
45	Cholesterol metabolism	1.33389	Star, Cyp27a1, Apoa2, Angptl3, Nceh1, Apoa1, Abcb11, Apoc3, Apoe, Abcg8, Apoc2, Soat1, Angptl4, Cideb, Lpl, Apob
46	scavenger receptor activity	1.32916	Endou, Vtn, Scart1, Tmprss15, Hhipl1, Scara5, Cd5l, Tmprss3, Cdcp3, Prss12, Ssc4d, Scarb2
47	calcium ion binding	1.31989	Eps15l1, Casq1, Syt4, Matn3, S100a3, P4htm, S100a5, Anxa8, Cubn, Pla2g2f, S100z, Guca1b, Plscr3, Cgref1, Matn4, Myl10, Myl2, Adgre5, Necab3, Efcab3, Lalba, Fkbp10, Sparcl1, Nucb2, Epdr1, Gas6, Clstn3, Ihh, F12, Cant1, Apcs, Fkbp7, Fam20c, Efcab10, Arsa, Aoc1, Cabs1, Doc2b, F7, Ppp3r2, Efhd1, Pla2g1b, Cemip2, Padi3, Tchhl1, S100a11, Comp, Calr3, Proz, Prrg4, Efcab6, Pla2g10, Aif1l, Egfl7, Mbl2, Ef…
48	carbohydrate transport	1.31901	Slc35a2, Slc2a2, Slc5a4b, Slc5a2, Slc2a10, Slc2a8, Slc5a11, Slc2a4, Slc50a1, Slc2a5
49	lens development in camera-type eye	1.30531	Crybb1, Pds5a, Frs2, Cryaa, Mip, Cryab, Cryba2, Crygc, Pitx3, Crygf, Ctns, Cryba1, Unc45b, Gje1
50	Chemokine signaling pathway	1.28383	Cxcl15, Ccr9, Hck, Ppbp, Ccl20, Hras, Cxcl9, Prkaca, Adcy4, Cxcl13, Ccl25, Gnb3, Adcy2, Ccl1, Gng13, Cxcl1, Ccl22, Pik3r2, Bcar1, Ccl4, Nfkbib, Gngt1, Xcl1, Ccl17, Adcy8, Gng4, Bad, Cxcl14, Pak1
51	response to zinc ion	1.2699	Slc30a3, Crip1, Aanat, Haao, Slc30a5, Slc30a4, Pam, Arg1, Slc30a2, Aldob
52	renal water absorption	1.25731	Ctns, Aqp3, Sctr, Hyal2, Aqp4, Aqp7, Has2
53	Gamma-carboxyglutamic acid	1.21697	F7, Gas6, Prrg4, Mgp, Prrg2, Proz
54	hydrolase activity, acting on carbon-nitrogen (but not peptide) bonds	1.21536	Amdhd1, Cad, Asah1, Dpysl3, Dpysl4, Dpysl2
55	Metal-binding	1.2055	Sdhd, Ptgis, Zfp511, Itgb2, Syt4, Calcoco1, Map3k6, Hddc2, S100a3, Lman2l, Glo1, S100a5, Cyp2e1, Exo5, Dnpep, Pla2g2f, Abo, Gdpd3, Nptx1, Optn, Slc3a1, Zfp605, Fgd2, Hdac4, Car6, Abcg8, Amhr2, Casz1, Tyrp1, Bnc1, Zfp184, Cpxm1, Fbxl19, Cant1, Apcs, Ikzf4, Tk1, Zfp593, Sephs1, Mcm10, Zbtb43, Pck1, Aoc1, Poll, Hmgcll1, Rrm2b, Acy1, Lhx6, Yme1l1, Cacna1h, Zbtb48, Cyp17a1, Rapsn, Cyp2u1, Timp1, Slc30…
56	establishment or maintenance of cell polarity	1.20451	Fscn2, Parva, Parvg, Fscn1, Fscn3, Rnd2, Rhoc
57	melanosome membrane	1.17043	Oca2, Abcb6, Ctns, Sytl2, Rab38, Slc45a2, Tyrp1
58	cell fate specification	1.15834	Tbx2, Tead4, Tbx4, Sox9, Tbx22, Dhh, Ihh, Tbx21, Tbx20, Tbx6, Smo, Apc2
59	peroxisomal membrane	1.1578	Acsl4, Pex10, Mpv17l, Pex11b, Pex16, Pex3, Abcd4, Fndc5, Pecr, Dhrs4, Aldh3a2, Pex11a
60	receptor antagonist activity	1.14643	Dkk1, Angpt2, Dkk2, Dkkl1, Dkk4
61	VWFA	1.14263	Clca3a2, Cpne9, Vwa7, Itgb2, Itgb2l, Vwa5b1, Col6a2, Cpne6, Matn3, Itih3, Coch, Gtf2h2, Itgae, Vwa3a, Itgax, Itgam, Col20a1, Matn4
62	protein dimerization activity	1.09473	Figla, Arnt2, Ppp3ca, E2f1, Ano1, E2f4, Hes2, Npas3, Hes3, Tppp, Myc, Msc, Ascl2, Id4, Myf5, Myod1, Twist2, Mesp1, Nsmce1, Polr1d, Il10, Hes7, Hif3a, Hps1, Bok, Apoe, Neurog2, Rilpl2, Bhlhe22, Myog, Tal2, Adcy8, Hif1a, Rilpl1, Bhlhe41
63	insulin-like growth factor binding	1.08765	Htra3, Igfbp5, Igfbp1, Igfbp4, Igfbp6, Igf1r, Ccn5
64	axon extension	1.0859	Ngf, Sema3a, Pou4f3, Ednra, Dvl1, Lhx2, Pou4f2, Nrp1, Edn1
65	calcium ion transport	1.08247	Mcoln2, Mcu, Ramp2, Ppp3ca, P2rx4, Asic1, Catsper3, Cacna1s, Myb, Cacng1, Trpm2, Cacng4, Trpm6, Chrna7, Atp2b1, Itpr1, Slc8a2, Cacnb3, Nos1, Cacna1h, Nmur1, Vdr, Camk2g, Trpc4, Camk2a, Trpv2, Cacnb4, Atp2a1
66	ammonium transport	1.05393	Rhag, Slc12a2, Rhcg, Rhd
67	metabolic process	1.03567	Pfkfb1, Lyg1, Man2b1, Hsd3b1, Cad, Ephx2, Srr, Mutyh, Glb1l, Ndst4, Alkbh8, Hyal5, Fbp2, Hyal1, Lyzl6, Ugdh, Pak3, Treh, Spam1, Pah, Xrcc6, Pam, Pcx, Aldh18a1, Cemip2, Pfkl, Galc, Mthfd1, Coasy, Plod3, Glb1l3, Hyal2, Mogs, Fuca2, Pak1
68	Immunoglobulin-like fold	1.03102	Jam3, Igsf1, Pdgfrl, Fcgr1, Pdcd1, Scn1b, Nfasc, Crlf1, Robo1, Mypn, Il27ra, Lrig3, Tnn, Ptpru, Lilra6, Col20a1, Iglon5, Psg17, Psg28, Psg19, Sva, Nfkb2, Ly9, Vpreb3, Il13ra1, Sval2, Fgfr4, Crtam, Plxna1, Lsr, Igsf5, Fcgrt, Il12rb1, Nectin4, Psg29, Cxadr, A1bg, Ildr1, Lox, Ceacam11, Lag3, Siglece, Mcam, Epha5, Ceacam18, Chl1, Tek, Hapln4, Myot, Ptgfrn, Fcer1a, Cd3d, Mpzl2, Bcam, Mybpc3, Madcam1, …
69	Transferase	1.02314	Pgk2, Sult1e1, Dnmt3l, Map3k6, Pnpt1, Mtr, Bmpr1a, Sult5a1, Plaat1, Abo, Nat9, Acaa1b, Awat1, Mcm3ap, Fut1, Srpk3, Sult1b1, Uck2, Tlk2, Cdk18, Amhr2, Tmt1b, Tnks2, Sult2a8, Clp1, Gatm, Ext2, Oxct1, Sephs1, Samd8, Tk1, Mettl6, Thumpd2, Pkdcc, Pck1, Ube2e1, Guk1, Polh, Ube2t, Scly, Poll, Brca1, Gstt4, Polrmt, Bckdk, Nat8, Stk32b, Epha5, Tek, Map3k20, Tssk4, Cers5, Pfkfb3, Nuak2, Ube3a, Cers4, Trim6…
70	Antp-type hexapeptide	1.01011	Hoxb6, Hoxc8, Hoxa4, Hoxa2, Hoxc5, Hoxb1, Hoxc6, Hoxa1
71	Sodium channel	1.0074	Scnn1a, Hcn3, Trpm2, Scnn1g, Asic2, Scn1b, Asic1, Asic5
72	negative regulation of amyloid fibril formation	1.00704	Pfdn6, Cryab, Apoe, Pfdn2, Pfdn1
73	endocardial cushion formation	1.00597	Tbx2, Bmp5, Tbx20, Bmp7, Robo1, Bmpr1a
74	Nucleotide metabolism	1.00344	Rrm2b, Ak2, Cant1, Xdh, Gmpr2, Nme4, Tk1, Hddc2, Uck2, Guk1, Adsl, Tymp, Ak8, Nme2, Upp2, Entpd2, Upp1, Nt5el, Adss1, Ada
75	OAR domain	1.00297	Pitx3, Vsx2, Pitx1, Pax7, Shox2
76	Cajal body	1.00296	Nop10, Frg1, Prpf31, Rdm1, Toe1, Dkc1, Nhp2

## Sheet: Cluster 6
DAVID functional clustering of genes in cluster 6 of platelet transcriptome of TMEV-infected mice
Cluster #	Pathway	Enrichment Score	Gene IDs
1	Membrane	3.0082	Adam8, Gpr153, Fmo9, Prss43, Apmap, Slc66a1, Or6c2b, Arxes1, Scn4a, Vps16, Kcnc4, Rhoq, Svopl, Cnga2, Coro1c, Pcsk2, Tmc3, Adgrg3, Smurf1, Tmem275, P2ry13, Dlgap2, Slc9a3, Reep1, Spry1, Afg1l, Abca3, Entpd1, Ildr2, Ildr2, Niban2, Skint7, Chpt1, Or14j10, Ksr2, Adgrg5, Nos3, Snx9, Esyt3, Faah, Smpd3, Pla2g15, Slc17a2, Cdk4, Vnn1, Il19, Rnf43, Scube1, Chst12, Mfsd4b5, Slc7a8, Dhrs7, Slc11a2, Cyp21a1…
2	Transferase	2.79275	Stk26, Nagk, Hecw2, Gstm4, Rock2, Ubr3, Rnf167, Ephb4, Naa60, Grk3, Adpgk, St6gal1, Trim24, Ubr2, Smurf1, Nek11, Dgki, Ntrk1, Map4k1, Rxylt1, Poli, Nrk, Alg8, B3gnt2, Lrsam1, Tgm3, Chpt1, Pigz, Ksr2, Rps6kl1, Dtx4, Cblb, Pla2g15, Cdk4, Phka1, Trmt9b, Dyrk3, Rnf43, Clk3, Chst12, Ndst1, Map3k7, Grk1, Fgfr3, Pkn3, Has1, Cnksr1, Pdss1, Adck2, Araf, Trim2, Dgkg, Comtd1, Gcat, Acat2, Ciita, Ak5, Syvn1,…
3	Mitochondrion	2.43068	Acsm1, Gps2, Akr7a5, Slc25a34, Aifm3, Suclg1, Acot13, Reep1, Hsdl1, Afg1l, Naxe, Gsr, Aldh4a1, Ubc, Acsl6, Fem1a, Mtif2, Nubpl, Slc25a14, Mthfd2l, Slc11a2, Cisd2, Pdss1, Ptcd3, Pmpcb, Gcat, Slc25a51, Dmgdh, Oxa1l, Polg, Clic5, Osgepl1, Nat8l, Sirt5, Atpaf1, Mtpap, Slc25a42, Cmc1, Pdk4, Ndufs2, Pgs1, Bola3, Tspoap1, Miga1, Mrps9, Abce1, Acsl5, Dhx30, Abhd6, Lyrm7, Tfam, 1600014C10Rik, Timm17b, Gcs…
4	TRANSMEM:Helical; Name=8	2.34769	Slc7a8, Slco6c1, Slco3a1, Chpt1, Slc1a6, Atp2a2, Slco1a1, Slc38a9, Ermp1, Abcc3, Tm6sf2, Slc7a13, Slc9a6, Slc9a3, Slc6a11, Slc6a12, Slco4a1, Slc2a13, Slc16a10, Slc6a3, Slc6a7, Slco1b2, Slc8b1
5	phototransduction	2.21108	Opn5, Gnat2, Opn1sw, Opn1mw, Rrh, Rgr, Rcvrn, Opn3
6	scavenger receptor activity	2.10188	Scart2, Corin, Msr1, Loxl4, Cd163, Tmprss4, Dmbt1, Tmprss2, Ackr2, Enpp1, Tmprss13, Cxcl16, Fcrl2
7	lysosome	2.03489	Neu3, Rab27a, Pld3, Lamtor2, Bace1, Slc66a1, Vps16, Abhd6, Rnf167, Pdgfrb, Mios, Kcnq1, Gga3, Ctsl, Atp6v0d1, Cd68, Slc49a4, Ifi30, Mpo, Uvrag, Vps11, Gpr137c, Spns1, Gla, Mfsd12, Abca3, Pde1c, Ldlr, Sult1c2, Tm9sf1, Irgm1, Dram1, Hexb, Bri3, Itfg2, Cltc, Pcsk9, Pla2g15, Slc17a2, Calr, Cxcr4, Eva1a, Ctsh, Vps13b, Slc46a3, Manba, Ctsc, Wdr45b, Slc35f6, Fgfr3, Slc17a9, Slc11a2, Gpr143, Slc15a4, Arl…
8	PDZ	1.93758	Card11, Sipa1l3, Mpp7, Apba3, Cnksr1, Magi2, Sipa1l1, Pdlim4, Gipc2, Magi3, Synpo2l, Sipa1, Ppp1r9a, Mast3, Magi1, Whrn, Synpo2, Nherf4, Pdlim2, Grip2, Grip1, Shank1, Pdzd2, Lmo7, Apba1, Nherf1, Apba2, Ush1c, Deptor, Ptpn13
9	Synaptic vesicle cycle	1.9277	Slc18a2, Stx1a, Atp6v0d1, Atp6v1c2, Unc13c, Stx1b, Ap2a2, Slc6a12, Nsf, Slc6a11, Slc17a6, Cacna1a, Atp6v0d2, Unc13b, Slc1a6, Atp6v1b1, Vamp2, Cltc, Slc18a1, Cplx4, Atp6v1g1, Slc6a7, Slc6a3, Slc17a8, Rab3a
10	homophilic cell adhesion via plasma membrane adhesion molecules	1.89268	Cadm4, Cdh5, Pcdh9, Pcdha10, Pik3cb, Ptprf, Cdh3, Pcdh12, Cadm2, Pcdhgc4, Pcdhb8, Pcdhb12, Pcdhb16, Dsg4, Fat4, Dsc1, Cdh26, Dchs1, Fat2, Kirrel3, Plxnb3, Dsc3, Cdhr4, Cdhr2, Cadm3, Ceacam5, Cdh12, Pcdh20, Cdhr1, Dsg2, Pcdhb6, Cdh15
11	cellular response to DNA damage stimulus	1.80958	Tdp2, Tonsl, Dclre1a, Kat7, Rad50, Mael, Taok3, Ino80d, Swi5, Clspn, Fh1, Mms19, Poldip2, Cdc5l, Smc5, Rad17, Dclre1c, Parg, Smarcal1, Hdgfl2, Inip, Uvrag, Rif1, Nae1, Xrcc1, Gtf2h5, Poli, Bccip, Gtf2h3, Chek1, Nthl1, Npas2, Faap24, Fancg, Prkdc, Pold4, Psmd14, Pidd1, Ascc2, Kdm4d, Ctc1, Macrod1, Dna2, Ash2l, Rfwd3, Mcm8, Pagr1a, Cul4b, Rpa1, Tdp1, Usp16, Ercc4, Aen, Samhd1, Ruvbl2, Chaf1b, Kat5,…
12	chemical synaptic transmission	1.80798	Gabrb3, Slitrk5, Gabrg3, Cacna1e, Or11h4, Mecp2, Npr2, Apba3, Chrna4, Fgf14, Drd4, Syt10, Pcdhb16, Glra4, Unc13c, Grin2b, Gabra6, Npy, Gabrb2, Gabra3, Cacna1a, Gria2, Gabre, Unc13b, Apba1, Gabrr2, Lrp8, Grin1, Htr1a, Chrm4, Chrnb1, Htr2c, Apba2, Cartpt, Glra3, Htr3b, Hrh4, Chrnb4, Nlgn3
13	Epidermal growth factor-like domain	1.6551	Ptgs2, Umodl1, Bcan, Adam8, Habp2, Lrp1, Egfem1, Lamc3, Jag2, Proc, Adam33, Otog, Matn2, Adgre1, Fat4, Efemp1, Megf8, Cntnap1, Acan, Crb1, Sned1, Itgbl1, Adam12, Atraid, Fat2, Ltbp2, Lrp1b, Cntnap3, Fbn1, Ldlr, Npnt, Itgb8, Dll3, Tenm2, Nell2, Tpo, Vwce, Lrp8, Lrp5, Egfl6, Scube1, Fbln2, Ntng1, Slit3, Adam19
14	Metal-binding	1.57093	S100a4, Adam8, Fbxo43, Impa1, Rnf167, Tyr, Adpgk, Trim24, Nek11, Dgki, Nsf, Thap1, Rcvrn, Poli, Egr1, Lrsam1, Slc25a54, Tgm3, Apobec1, Chpt1, Itga7, Ksr2, Ampd2, Nos3, Lrp8, Zfp90, Trim30b, Esyt3, Smpd3, Dtx4, Pla2g15, Nubpl, Prl3b1, Dyrk3, Rnf43, Mmp9, Def8, Tyw5, Lvrn, Cyp21a1, Chn2, Pdss1, Araf, Trim2, Czib, Samhd1, Endov, Zfp174, Prl2c1, Ace2, Pla2g4e, Car14, Afp, Mmp13, Zfp579, Efcab3, Pon1,…
15	Nuclease	1.51649	Ang4, Pld3, Pan2, Tdp2, Dnase1l3, Snd1, Isg20l2, Tdp1, Parn, Ercc4, Exosc10, Aen, Dclre1c, Endov, Lactb2, Exd2, Plscr1, Pld4, Nthl1, Ankzf1, Mgme1, Cnot8, Mre11a, Zc3h12c, Eri1, Ankle1, Dna2, Ddx1
16	SH2 domain	1.50583	Bmx, Nck1, Tns4, Socs3, Socs6, Chn2, Dapp1, Shc1, Ptpn6, Grb7, Tns3, Rin3, Shc3, Socs7, Blnk, Grap, Jak3, Sh2d4a, Plcg1, Sh2d6, Sh2d2a, She, Vav1
17	epithelial cilium movement	1.50286	Ccdc103, Dnah11, Stk36, Ccdc40, Cfap43, Nme7, Spag17, Spag6l
18	One carbon pool by folate	1.50185	Mthfd2l, Aldh1l1, Amt, Mthfr, Dhfr, Shmt2, Mtfmt, Gart
19	Rossmann-like alpha/beta/alpha sandwich fold	1.49788	Ears2, Nmnat2, Ctu2, Asns, Pcyt1a, Qars1, Trmu, Lars2, Wars2, Wars1, Pcyt2, Nmnat3
20	rhythmic process	1.48976	Magel2, Gfpt1, Kdm5b, Rock2, Rai1, Drd4, Crem, Btrc, Nr1d1, Grin2b, Prox1, Bhlhe40, Egr1, Rorc, Npas2, Usp2, Hdac3, Prkdc, Mta1, Ezh2, Thrap3, Pparg, Adcy1, Sin3a, Crtc1, Grin1, Cavin3, Ahr, Hnrnpd, Ciart
21	transmembrane transporter activity	1.46068	Slc18a2, Slc46a3, Slc43a3, Mfsd4a, Slc7a8, Slc35f6, Slc17a9, Slco3a1, Slc15a4, Slc2a9, Slc15a1, Svopl, Slco1a1, Slc4a3, Abcc3, Slc7a13, Slco4a1, Slc17a6, Slc35f1, Spns1, Slc44a4, Slc37a3, Oscp1, Slc25a22, Cnnm1, Slc16a12, Slc13a4, Slc22a19, Slc5a10, Slc18a1, Slc17a2, Mfsd14b, Slc25a48, Slc16a10, Slc2a13, Slc17a8, Slco1b2, Slc25a14, Slc22a16
22	Zinc finger, NHR/GATA-type	1.43084	Nr2f6, Rorc, Rxra, Nr4a3, Nr2e3, Nr6a1, Nr1h4, Pparg, Gata2, Nr4a2, Nr1d1, Rxrb, Gatad2b, Esr1
23	protein secretion	1.42052	Rab27a, Arfgap3, Rab3c, Abca1, Rab3d, Rab15, Steap3, Tmed2, Plcg1, Rab10, P2rx7, Rab3a
24	Protein kinase C-like, phorbol ester/diacylglycerol binding	1.37591	Def8, Prkcz, Cit, Rock2, Chn2, Unc13b, Araf, Dgkg, Ksr2, Raf1, Tns3, Cdc42bpg, Unc13c, Dgkb, Dgki, Vav1
25	Pleckstrin homology-like domain	1.36014	Adap1, Sbf1, Eps8l1, Tns4, Plekha4, Acap3, Ect2, Apba3, Cit, Rock2, Plekhg1, Dab2ip, Grk3, Plekha1, Tns3, Arhgef25, Ptpn14, Mtmr9, Arhgef7, Dok3, Rtkn2, Plch1, Arhgap24, Frmd6, Myo10, Epb41l4a, Niban2, Apba1, Myo15a, Anks1, Grb7, Niban3, Osbpl1a, Osbpl7, Irs2, Mapkap1, Ptpn13, Arhgef17, Sptbn4, Myo7a, Bmx, Sos1, Afap1l1, Rasa4, Cyth2, Cnksr1, Fermt1, Shc1, Arhgef9, Cdc42bpg, Numbl, Homer2, Arhgap…
26	Ion transport	1.3539	Atp1a3, Kcnj12, Scn4a, Kcnc4, Cnga2, Scn3a, Kcnq1, Tmc3, Slc9a3, Kcnj9, Ttyh1, Cldn16, Trf, Gabra3, Gabrb2, Slc8a1, Clca3a1, Gabre, Atp1a2, Slc24a3, Kcnc3, Cnnm1, Slc39a10, Hcn2, Grin1, Slc26a8, Tmco3, Slc17a2, Glra3, Atp6v1g1, Htr3b, Mfsd4b5, Cacna1e, Slc34a1, Slc11a2, Steap3, Trpm5, Slc38a4, Slc39a3, Kcns3, Glra4, Atp6v1c2, Clic5, Trpv4, Gria2, Mlc1, Ryr1, Calhm5, Gabrr2, Atp6v1b1, Kcnj6, Slc22…
27	sphingolipid metabolic process	1.3417	B4galt5, Gal3st1, Aloxe3, Sptlc2, Gm2a, B4galnt1, Sptlc1, Agk, Alox12b, Smpd3, Sptssb, Smpd2, Ugt8a
28	activation of GTPase activity	1.30273	Evi5, Arhgap24, Evi5l, Sipa1l3, Ect2, Tbc1d12, Tbc1d22b, Coro1c, Sgsm1, Sipa1l1, Iqsec3, Ccdc125, Tbc1d10b, Tbc1d25, Sipa1, Ralgapa2, Ndel1, Tbc1d13, Arhgap42, Adprhl1, Tbc1d2, Tbc1d16
29	Glycerophospholipid metabolism	1.30225	Pld3, Pld4, Lpcat3, Pla2g2e, Ptdss2, Pcyt1a, Pemt, Chpt1, Pisd, Dgkg, Cept1, Pcyt2, Gpam, Dgkb, Ache, Pla2g15, Pla2g2a, Dgki, Mboat7, Pgs1, Pla2g4e, Gpat4
30	Sensory transduction	1.26391	Gnat2, Opn1sw, Opn1mw, Grk1, Or13g1, Rs1, Or4e1, Or7a39, Opn3, Cnga2, Or6c219, Opn5, Rp1l1, Rlbp1, Clrn1, Rspo3, Or5b94, Gucy2f, Pdcl, Clic5, Rcvrn, Or5p4, Or6d12, Or4e2, Cacna1f, Rrh, Or7a40, Gucy2e, Tas1r1, Vsx1, Rdh12, Or56a41, Adcy3, Or4c35, Or14c40, Or56a4, Or8g35, Trpm8, Rgr, Piezo2, Cplx4, Or10d1b, Or3a1d, Tas2r113, Slc8b1, Bfsp2, Or14c41, Scnn1b
31	Leucine-rich repeat	1.25342	Slitrk5, Kdm2b, Tonsl, Ogn, Cpn2, Lgr5, Lrrn2, Lrrc41, Nxf2, Lrrc27, Lrig1, Ntrk1, Dnaaf1, Ppp1r37, Nepn, Lrsam1, Ntrk2, Lrwd1, Lrrc39, Fbxl4, Lrrc47, Pidd1, Lrrc42, Tbcel, Nlrp4c, Lrrc14, Flrt3, Slit3, Drc3, Zyg11a, Nxf7, Tsku, Nxf3, Nlrp4a, Cep72, Lrch2, Fbxl7, Lrrd1, Lrrc25, Fbxl20, Tlr8, Lrtm1, Lrrc20, Ciita, Xrra1, Oog3, Optc, Lrfn1, Adgra2, Slitrk3, Carmil3, Lrrc3b, Rtn4rl1, Lrfn4, Lrriq1, …
32	Ion transport	1.25324	Cacna1a, Cacna1e, Cacna1d, Kcnh7, Cacna1f, Kcng2, Scn4a, Kcnc4, Trpv1, Trpm5, Scn3a, Kcnq1, Kcns3, Kcnf1, Trpv4, Scn5a
33	sodium ion transport	1.25261	Slc9a2, Atp1a3, Slc34a1, Scn4a, Slc38a4, Scn3a, Kcnq1, Slc9a3, Scn4b, Slc20a2, Slc17a6, Fgf13, Commd9, Slc8a1, Atp1a2, Slc24a3, Hcn2, Slc13a4, Nherf1, Slc5a10, Slc17a2, Slc9a6, Kcne3, Slc17a8, Slc38a7, Slc8b1, Scn5a, Scnn1b
34	EGF-like 1	1.25099	Habp2, Lrp1, Egfem1, Jag2, Proc, Matn2, Adgre1, Fat4, Megf8, Cntnap1, Sned1, Fat2, Ltbp2, Lrp1b, Fbn1, Ldlr, Npnt, Itgb8, Dll3, Tenm2, Nell2, Vwce, Lrp8, Lrp5, Egfl6, Slit3
35	Single-stranded nucleic acid binding R3H	1.23776	Spag7, Nfx1, Ighmbp2, Parn, R3hdm2
36	Phosphotyrosine interaction domain	1.2274	Tns3, Anks1, Numbl, Eps8l1, Shc3, Tns4, Apba2, Apba3, Apbb2, Shc1, Apba1
37	Immunoglobulin-like fold	1.21828	Bcan, Lrrn2, Ptk7, Hapln2, Ephb4, Trim46, Epb42, Icosl, Sema7a, Vsig2, Lrig1, Ntrk1, Kirrel3, Clca3a1, Ptprh, Kirrel2, Tgm3, Ildr2, Ildr2, Skint7, F830045P16Rik, Cd83, Il1rap, Tgm5, Slamf8, Vpreb1a, Manba, Umodl1, Cd300lg, Fgfr3, Cd4, Cntfr, Trim2, Slamf9, Cntn4, Btnl9, Il22ra1, Sema3f, Nxpe2, Ctla4, Cntn3, Sectm1a, Kdr, Ebf2, Sema3e, Cadm3, Ptprb, Rel, Fcamr, Negr1, Havcr2, Adora3, Lrfn4, Pzp, T…
38	phosphatidylcholine metabolic process	1.20916	Abca3, Pla2g2e, Pla2g15, Pla2g2a, Mecp2, Pon1, Lipc, Abhd3
39	neural crest cell migration	1.18015	Sema4f, Sema3d, Sema4c, Sema7a, Sema4b, Efnb1, Sema3e, Sema3f, Coro1c, Kitl, Edn3
40	ANK repeat	1.15865	Tonsl, Acap3, Abtb3, Potefam1, Espn, Rai14, Ankdd1b, Ankrd40, Trpc3, Ankrd60, Ankrd33, Asb5, Trpv4, Ank2, Dgki, Ankmy2, Zranb1, Uaca, Dzank1, Hace1, Kank4, Shank1, Ankzf1, Asb9, Asb11, Potegl, Ankfy1, Ankrd34c, Trpv1, Anks1, Fem1a, Ankrd42, Ppp1r12c, Ankar, Osbpl1a, Psmd10, Ankle1, Tanc1, Acbd6, Asb17, Ank1
41	chromosome, centromeric region	1.1237	Ercc6l, Nuf2, Kat7, Clasp2, Nsl1, Fbxo28, Sycp1, Nek2, Mad2l1, Bod1, Smc5, Bub1b, Kat5, Ndel1, Uvrag, Zwint, Ska1, Nup133, Cenpv, Kif2c, Ska2, Lrwd1, Clasp1, Cdca8, Sycp2l, Cenpt, Gpatch11, Mki67
42	One carbon pool by folate	1.10603	Mthfd2l, Aldh1l1, Amt, Mthfr, Dhfr, Shmt2, Mtfmt, Gart
43	phosphatase activity	1.07843	Ctdspl2, Ptprf, Pudp, Tns3, Inpp5e, Enpp1, Ptpn14, Ppm1d, Ptprk, Fra10ac1, Ptpro, Dusp1, Ptprh, Ptpn12, Dusp2, Ctdspl, Pgam5, Ptprb, Ptpn6, Ptpn20, Dusp13b, Acp1, Dusp3, Mdp1, Ptpn13, Ptprs
44	Low-density lipoprotein (LDL) receptor class A repeat	1.06422	Corin, Lrp1b, C6, Ldlr, Lrp1, Tmprss4, Tmprss2, C8b, Lrp8, Ldlrad4, Lrp11, Lrp5, Tmprss6, Tmprss13
45	peroxisome proliferator activated receptor signaling pathway	1.05312	Rxra, Med1, Aloxe3, Pparg, Fam120b
46	Alpha/beta hydrolase fold-1	1.04446	Abhd16a, Bphl, Serhl, Mgll, Abhd6, Abhd11, Abhd3
47	Transducer	1.02578	Opn1sw, Vmn1r51, Gpr153, Or6c2b, Opn5, Or6c75, Adgrg3, Or2aa1, P2ry13, Or5p4, Nmbr, Adgrl3, Lpar2, Or6c216, Gpr37, Gng7, Or6c68, Or4c10b, Gpr50, Or8b43, Sucnr1, Vmn1r67, Or14j10, Adgrg5, Or6k14, Ackr2, Hcar2, Htr2c, Or13a22, Or10a3, Or2d4, Or3a1d, Or10a3m, Irs2, Cckbr, Or6s1, Pgr15l, Or52h1, Gpr143, Cysltr2, Fzd3, Or1e32, Or4n5, Or10ag2, Gipr, Or2n1c, Or13e8, Or6aa1, Npffr2, Adra2b, Or11n2, Tas1r…
48	synaptic vesicle exocytosis	1.02539	Unc13c, Stx1b, Cplx4, Ppfia3, Unc13b, Stx1a, P2rx7, Rab3a, Vamp2
49	cell cycle	1.02351	Cdc20, Nuf2, Dclre1a, Nr4a3, Ncaph, Gmnn, Poc5, Clspn, Ssna1, Klhl42, Eif2ak4, Snx18, Mtbp, Smc5, Nek11, Thap1, Nae1, Hace1, Ckap2, Usp8, Septin10, Snx9, Bex2, Cltc, Smpd3, Cdk4, Dyrk3, Cdc16, Gas2, Sde2, Mcm8, Steap3, Dbf4, Kif13a, Fbxl7, Arl8a, Mlf1, Usp16, Spdye4a, Anapc15, Ccpg1, Ska1, Tfdp2, Dusp1, Usp2, Kif2c, Ppp2r2d, Mastl, Map3k8, Foxg1, Ino80, Pim2, Anapc5, Npat, Rad50, Ect2, Cit, Usp44…
50	One carbon pool by folate	1.0127	Mthfd2l, Aldh1l1, Amt, Mthfr, Dhfr, Shmt2, Mtfmt, Gart
51	extracellular region	1.01201	Amelx, Bcan, S100a4, Fgf16, Cpn2, Tex101, Proc, Col26a1, Hapln2, Npvf, Tff3, Plg, Adpgk, St6gal1, Orm1, Efemp1, Pcsk2, Lipc, Amtn, Naxe, Trf, Bdnf, Pdzd2, Adcyap1, Il33, Lrp8, Edn3, Wnt10b, Il1rap, Hrg, Smpd3, Pla2g15, Prl3b1, Il19, Mmp9, Scube1, Reg3g, Slit3, Umodl1, Tsku, Serpina3n, Cxcl5, Pf4, Uts2, Prss57, Cntn4, Npy, Pradc1, Ace2, Afp, Mmp13, Pon1, Lyzl1, Prl3d3, Sema3e, Sost, Tmprss4, Spag1…
52	SH3 domain binding	1.00948	Arhgap6, Sos1, Noxa1, Afap1l1, Cit, Dab2ip, Drd4, Tom1l1, Espn, Cntnap1, Mvb12a, Uvrag, Adam12, Sh2d2a, Mical1, Plscr1, Afap1l2, Shank1, Ptpn12, Usp8, Fut8, Khdrbs2, Ptpn6, Cblb, Acp1, Adam19

## Sheet: Cluster 7
DAVID functional clustering of genes in cluster 7 of platelet transcriptome of TMEV-infected mice
Cluster #	Pathway	Enrichment Score	Gene IDs
1	microtubule	3.70212	Wdr44, Dnah9, Togaram1, Macf1, Dnal4, Hsph1, Zfp207, Katnal1, Dnm1l, Dnm3, Tubb2b, Pafah1b1, Kif21a, Nicn1, Kif9, Aspm, Kif16b, Rassf5, Kif26b, Tubgcp4, Tiam1, Dnah2, Dnah7a, Dnah14, Kif1b, Cdk5rap3, Kif1a, Dnah6, Cep57, Dynlt2a1, Kifc3, Dnah17, Map4
2	Pleckstrin homology-like domain	3.32985	Arhgap22, Tln1, Epb41l5, Plekhb2, Spata13, Plekha8, Vav2, Fam43a, Dnm3, Phlpp1, Osbpl11, Plekhb1, Agap1, Osbpl5, Sntb1, Tiam1, Wdfy3, Sntg2, Arhgap12, Osbpl9, Sh2b3, Prkd2, Kif1b, Itsn1, Nf1, Arhgap26, Plcd1, Rasgrf2, Cadps2, Kif1a, Arhgap27, Asap3, Rasa2, Irs4, Anln
3	chromatin organization	3.27584	Loxl2, Brd4, Kdm4b, Meaf6, Usp22, Kdm5c, Dot1l, Zmynd11, Chd7, Brd1, Msl1, Uimc1, N6amt1, Kmt5b, Phf2, Usp49, L3mbtl1, Ash1l, Mtf2, Hcfc1, Chd6, Bag6, Suds3, Nr3c1, Sfmbt1, Phf19, Gatad1, Ctcf, Kdm1b, Cecr2, Baz2a, Prkaa2
4	Bromodomain	3.04022	Baz2a, Ash1l, Cecr2, Baz1a, Brwd1, Brd4, Brwd3, Kat2b, Zmynd11, Brd1
5	actin binding	3.02916	Myo6, Slc4a1, Hip1, Tln1, Actn2, Med28, Diaph3, Macf1, Trpc5, Wdr1, Capzb, Flnc, Mical2, Fmn1, Myo3b, Mib2, Pdlim3, Gbp2, Myh11, Sntb1, Coro2b, Pick1, Sntg2, Cnn2, Itprid2, Phactr2, Coro1b, Myo9a, Myh14, Mobp, Klhl2, Nexn, Dstn, Arpc4, Ablim2, Anln, Myh1, Ppp1r9b
6	endoplasmic reticulum	2.80451	Clgn, Erlin1, S100a10, Bsg, Ndfip1, H2-T10, Slc27a3, Usp19, Ubxn1, B3gat1, Fmo1, Dnajb12, Atp2b2, Pgap1, Man1b1, Bscl2, Crtap, Osbpl5, Pigo, P4ha1, Ube2j2, Cln8, Cftr, Cav1, Trappc9, Suco, Psmg1, Rasgrf2, Spcs3, Atp13a1, H2-T3, Gm45837, Agpat5, Loxl2, Ccdc47, Brsk2, Ppib, Sec61a1, Ddx41, Rab5if, Tmed5, Scp2, Asph, Slc27a2, Hsp90b1, H2-M9, Trappc2, Zdhhc9, Aqp8, Cyp4a12a, Ryr3, Scd3, Tbc1d20, Mzb1…
7	GTPase activator activity	2.62334	Agap1, Arhgap22, Arhgap1, Ralgapb, Tbc1d20, Srgap1, Arhgap12, Nprl3, Rgs9, Myo9a, Garnl3, Arhgap29, Nf1, Arhgap26, Gmip, Tbc1d17, Arhgap27, Dlc1, Asap3, Stard8, Flcn, Rasa2, Srgap3
8	C2 calcium-dependent membrane targeting	2.47845	Pla2g4a, Rpgrip1, Rpgrip1l, Syt7, Prkcq, Myof, C2cd4c, Cpne3, Syt15, Prkce, Cpne5, Prkch, Itsn1, Rims2, Plcd1, Cadps2, Fer1l6, Mctp2, Rasa2, C2cd5
9	metal ion binding	2.47725	Cyp11a1, Zfp606, Usp5, Gnai2, Zmat2, Zfp185, Zfp592, Capn1, Limd1, Rnf24, Adcy10, B3gat1, Gmip, Ash1l, Mtf2, Polr2a, Trim67, Rassf5, P4ha1, Rpl37rt, Reps2, Timm8a1, Zfp952, Dnase1l2, Baz2a, Acsm3, Baz1a, Plcd1, Cadps2, Brsk2, Zfp473, Ago3, Nr4a1, Kdm5c, Zfp945, Tph1, Cpne5, Eri2, Galnt17, Sparc, Pdxk, Myt1l, Gda, Zfp980, Scd3, Mptx1, Kdm1b, Prkcq, Zfand4, Tcn2, Zfp281, Fkbp14, Zfp942, Mis18a, Zfp…
10	WD40/YVTN repeat-like-containing domain	2.37188	Wdr44, Fbxw16, Sema5b, Mlst8, Anapc4, Brwd3, Plxna2, Atg16l1, Wdr64, Wdr1, Cop1, Pafah1b1, Kif21a, Arhgef10, Taf1c, Sf3b3, Tle6, Zfp106, Dcaf6, Coro2b, Wdr83, Tbl1x, Gnb1l, Copa, Wdfy3, Taf5, Sort1, Coro1b, Brwd1, Dync2i1, Mapkbp1, Wdfy1
11	ER to Golgi vesicle-mediated transport	2.20998	Trappc9, Trappc4, Trappc12, Copa, Trappc2, Tbc1d20, Trappc2l, Pgap1, Tmed5, Trappc5
12	cilium movement involved in cell motility	2.20472	Dnah9, Kif26b, Kifap3, Dnah2, Dnah7a, Dnah14, Kif1b, Kif21a, Dync2i1, Kif1a, Dnah6, Dynlt2a1, Kifc3, Dnah17, Kif9, Kif16b
13	protein phosphorylation	2.17832	Rab11a, Gnai2, Adcy9, Abca9, Slc27a3, Adcy10, Trim23, Lats2, Grk6, Clpb, Atp2b2, Prkar2a, Ptpa, Rit1, Pask, Ube2j2, Tesk1, Pex6, Atp8b5, Dnah2, Cftr, Actr1a, Pik3cg, Mapk7, Epha2, Dnah14, Myo9a, Kif1b, Acsm3, Phkg2, Mapk14, Dnah6, Epha3, Atp13a1, Gm45837, Orc5, Ddx10, Brsk2, Ntrk3, Iqca1, Ddx41, Arl15, Uhmk1, Gatc, Slc27a2, Hsph1, Hsp90b1, Rapgef3, Rabl6, Kif21a, Myo3b, 4930544G11Rik, Abcb10, Pdx…
14	microtubule motor activity	1.91116	Dnah9, Kif26b, Kifap3, Dnah2, Dnah7a, Dnah14, Kif1b, Kif21a, Dync2i1, Kif1a, Dnah6, Dynlt2a1, Kifc3, Dnah17, Kif9, Kif16b
15	Golgi apparatus	1.84742	Myo6, Wdr44, B3gnt4, Ipo5, Rab11a, Hip1, Use1, Copz1, Plekha8, Ndfip1, H2-T10, Rnf24, Gimap7, Prkce, Mif4gd, Golga7, Dnm3, Slpi, B3gat1, Trim23, Osbpl11, Trappc12, Gbp2, Ash1l, Fndc3a, Trappc4, Pla2g4a, Naa12, Gbf1, Copa, Pick1, Rab21, Bicd1, Cav1, Aftph, Trappc9, Pkhd1, Prkd2, Lyset, Psmg1, Galnt15, Chst10, Kifc3, H2-T3, Ccn2, Gm45837, Marf1, Slc35d2, H2-T22, Cd44, St8sia1, Atp7a, Dhcr24, Kifap3…
16	Dimeric alpha-beta barrel	1.69234	Nipsnap2, Nipsnap3a, Nipsnap1
17	Ubiquitin-associated/translation elongation factor EF1B, N-terminal, eukaryote	1.64056	Ubxn1, Usp5, Tnrc6c, Mark2, Lats2, Mark1, Nub1, Ubqln1
18	Protein kinase C-like, phorbol ester/diacylglycerol binding	1.57869	Prkce, Prkd2, Rassf5, Prkch, Myo9a, Arhgap29, Gmip, Braf, Stac, Prkcq, Vav2
19	UBQ	1.54392	Kxd1, Tmub2, Bag6, Ubl4a, Midn, Zfand4, Ubqln1
20	Tryptophan metabolism	1.42507	Il4i1, Aox4, Dlst, Tph1, Maob, Aox1
21	Zinc finger, FYVE/PHD-type	1.39521	Ash1l, Mtf2, Dnmt3c, Phf19, Kdm4b, Dnmt3b, Zfyve21, Kdm5c, Zmynd11, Wdfy3, Brd1, Baz2a, Rims2, Baz1a, Phf2, Wdfy1
22	Armadillo-like helical	1.37227	Togaram1, Ipo5, Ckap5, Tango6, Diaph3, Armcx3, Arid1b, Mroh2b, Kifap3, Ipo9, Psme4, Psmd1, Wdfy3, Utp20, Ranbp17, Terb1, Ctnnbl1, Pum3, Ipo4, Ncapd3, Armcx5, Gprasp2, Ap1g1
23	AAA+ ATPase domain	1.3606	Iqca1, Pex6, Dnah2, Cftr, Dnah7a, Abca9, Dnah14, Katnal1, Abcc5, Rfc1, Dnah6, Srp54c, Clpb, Abcb10, Cdc6
24	Src homology-3 domain	1.34099	Cass4, Abi2, Dlg2, Spata13, Abl2, Srgap1, Macf1, Tnk1, Sla2, Fyb1, Vav2, Arhgap12, Samsn1, Itsn1, Dsp, Arhgap26, Arhgap27, Stac, Srgap3
25	PDZ domain	1.30362	Rhpn2, Patj, Sntb1, Dlg2, Tiam1, Snx27, Pick1, Pard6a, Sntg2, Pard3, Ahnak, Rims2, Pdlim3, Ppp1r9b
26	Cyclic nucleotide-binding-like	1.2891	Rapgef3, Kcnh2, Cnga1, Cnnm4, Cnnm2, Prkar2a, Pnpla7
27	Actin-binding	1.28072	Myo6, Flnc, Myo9a, Myh14, Actn2, Myo3b, Macf1, Myh11, Ppp1r9b, Myh1
28	Ubl conjugation	1.25213	Zmat2, Nol8, Nfe2, Ptrh2, Meaf6, Bbx, Zfp592, Traf3, Ndfip1, Zmynd11, Luc7l3, Uimc1, Slc3a2, Phf2, Ranbp9, Ash1l, Mtf2, Polr2a, Rsrc2, Xpc, Suds3, Tiam1, Ldb1, Gatad1, Cftr, Cav1, Epha2, Itprid2, Baz2a, Zmym2, Fanci, Baz1a, Mapk14, Cdk5rap3, Rasgrf2, Adgrb1, Lsm14b, Orc5, Ddx10, Exosc3, Brsk2, Nop58, Zfp473, Brd4, Dnmt3b, Ago3, Ddx41, Kdm5c, Tph1, Tcf3, Tspyl1, Msl1, Acd, Cd86, Hnrnpc, Ccnd3, Erb…
29	Tetratricopeptide-like helical	1.24972	Snx20, Tanc2, Crtap, Coa7, P4ha1, Cstf3, Ttc7, Fkbp5, Ttc41, Ttc27, Pex5l, Ptcd2, Cops2, Asph, Nub1, Adcy10, Dnajc3, Trank1, Trappc12, Srp72, Utp6, Nphp3, Gpsm3
30	Flavoprotein	1.21891	Il4i1, Aox4, Fmo1, Cyb5r3, Dhcr24, Acadm, Fmo4, Mical2, Kdm1b, Maob, Txnrd2, Aox1
31	Chitinase domain	1.21515	Gpnmb, AU040320, Pkd1
32	chloride transport	1.20017	Slc4a1, Clcn4, Gabrb1, Slc12a5, Ttyh2, Clic1, Ttyh3, Wnk4, Slc26a7, Tspo, Glra2, Cftr
33	Forkhead-associated (FHA) domain	1.19414	Chek2, Kif1b, Foxk1, Kif1a, Slmap, Kif16b
34	ribosome binding	1.17956	Ccdc47, Bag6, Eif5a, Sec61a1, Srp72, Dnajc1, Srp68
35	Thrombospondin, type 1 repeat	1.1728	Adamtsl2, Sema5b, Adamts13, Hmcn1, Adgrb1, Ccn4, Ccn2
36	Protein export	1.16477	Sec61a1, Srp72, Srp54c, Srp68, Spcs3
37	Epidermal growth factor-like domain	1.15796	Lama1, Hmcn2, Megf6, Slit1, Tenm4, Astn1, Hmcn1, Tll2, Oit3, Ltbp3, Lamc2, Impg2, Mep1a, Vcan, Scarf1, Lama4, Tll1, Lrp2, Edil3, Fat3, Dner
38	Zinc finger, ZZ-type	1.1213	Herc2, Zzef1, Mib2, Kcmf1
39	cell division	1.11449	Ralb, Gnai2, Ckap5, Brsk2, Anapc4, Rbbp8, Prkce, Zc3hc1, Zfp207, Ppp1ca, Pard3, Pafah1b1, Lats2, Ccnd3, Ppp1r1c, Aspm, Cdk1, Chek2, Cntrl, Tacc1, Hmcn1, Pard6a, Spdl1, Mis18a, Sgo2b, Ncapd3, Cdc6, Map4, Anln
40	histone H3 acetylation	1.10425	Taf4, Usp22, Kat2b, Spi1, Brd1, Per1, Taf5, Tcf3
41	protein targeting to membrane	1.10399	Golga7, Pard3, Zdhhc9, Golga7b, Micall1
42	receptor complex	1.08972	Erbb4, Il13ra2, Itln1, Gabrb1, Epha8, Ntrk3, Pex5l, Epha2, Lhcgr, Impg2, Pkd1l3, Ripk1, Ramp1, Ephb1, Adgrv1, Lrp2, Grm7, Epha3, Fgfr1
43	FAD-binding PCMH-type	1.07898	Aox4, Dhcr24, Aox1
44	von Willebrand factor, type C	1.05296	Tecta, Fcgbp, Col3a1, Bmper, Ccn4, Ccn2
45	extracellular matrix	1.03525	Col4a6, Dcn, Col3a1, Ccn4, Ltbp3, Adamtsl2, Oc90, Impg2, Vcan, Fcgbp, Hpse, Sparc, Adamts13, Lama1, Col22a1, Hmcn2, Tecta, Spock3, Emilin1, Glg1, Col15a1, Lamc2, Mmp25, Bmper, Col4a1, Ccn2
46	LisH dimerisation motif	1.03009	Pafah1b1, Cep43, Tbl1x, Ranbp9, Taf5
47	lipid metabolic process	1.00824	Cyp11a1, Adh7, St8sia1, Erlin1, Dhcr24, Cds1, Crls1, Lipa, Slc27a3, Scp2, Pnlip, Slc27a2, Rdh13, Gstm2, Pafah1b1, Bcat2, Elovl5, Bscl2, Pla2g4a, Hacd4, Fuca1, B3galt5, Acadm, Rubcnl, Scd3, Naga, Pik3cg, Agpat3, Neu1, Gpat2, Aox1, Nr1h2, Prkaa2, Cyb5r3, Acsm3, Serinc4, Elovl1, Plcd1, Abhd2, Chst10, Nphp3, Pnpla7, Agpat5

## Sheet: Cluster 8
DAVID functional clustering of genes in cluster 8 of platelet transcriptome of TMEV-infected mice
Cluster #	Pathway	Enrichment Score	Gene IDs
1	Extracellular ligand-binding receptor	2.72384	Grm2, Vmn2r77, Vmn2r24, Npr1, Vmn2r46, Vmn2r63, Vmn2r25, Gria3, Vmn2r23, Vmn2r26, Vmn2r102, Gucy2d, Grin3a, Vmn2r69, Vmn2r108, Gucy2g, Vmn2r84, Vmn2r89, Vmn2r49, Vmn2r51, Gucy2c, Vmn2r16, Vmn2r28, Vmn2r86, Grik5, Grid2, Vmn2r115, Vmn2r87, Vmn2r8, Vmn2r45, Vmn2r13, Vmn2r110, Vmn2r52, Vmn2r17
2	endoplasmic reticulum	2.23536	Irag2, Adamts9, H6pd, H2-M10.4, Pou2f1, Ormdl2, Hmgcr, Ryr2, Casp4, Pigt, Wls, Awat2, Lars1, Abca8a, Stx16, Soat2, Osbpl6, Slc1a1, Lypla1, Chrm3, Ephx1, Cyp2d9, Stt3b, Cyp3a16, Ces1c, Faf1, Sptssa, Gba1, Lpcat2, P3h4, Armc10, Ormdl1, Dad1, Rtn1, Cd3e, Rcn1, Txndc5, Serpina1a, Fndc3b, H2-T23, Agmo, Degs1, Cln6, Cyp3a25, Slc8a3, Eif5a2, Kdsr, Lmf1, Slc36a1, Agpat2, Mctp1, Cyp2d26, Cyp2c38, H2-M10.6…
3	guanyl-nucleotide exchange factor activity	2.17294	Dock4, Rcc2, Arhgef38, Bcar3, 4930449I24Rik, Gm3404, Ccz1, Fgd6, Sh3bp5, Dock9, Ralgds, Iqsec2, Plekhg2, Arhgef26, Fgd3, Dennd6a, Rasgef1b, Rabgef1, Dis3, Ralgps2, Sh2d3c, Rasgrp1, Prex2, Gm3402, Gm3415, Arfgef3, Cyth3, Gm6370, Gm3409, Gm6408, Ric8b, Cyth4
4	symporter activity	1.88488	Slc6a1, Slc5a6, Slc6a14, Slc6a2, Slc16a14, Slc10a2, Slc6a6, Slc23a2, Slc16a4, Slc36a1, Slc4a4, Slc34a3, Slc13a1, Slc6a19, Slc45a3, Slc1a1, Slc15a2, Slc25a18, Mfsd4b1, Slc22a5, Slc6a4, Slc12a7, Slc39a8, Slc46a1
5	Src homology-3 domain	1.7462	Dock4, Pstpip1, Ncf2, Myo15b, Bin1, Arhgef38, Baiap2, Sh3gl1, Otor, Srgap2, Shank3, Dlg4, Asap2, Sash1, Ncf4, Map3k21, Arhgef26, Sh3bp4, Ahi1, Sash3, Neb, Itk, Arhgap32, Dlg3, Grap2, Sh3gl3, Stam, Caskin2, Sorbs2, Cacnb2, Frk, Sh3rf1, Crk
6	Mitochondrion	1.61509	Atg4b, Hccs, Cox7b, Dhx36, Slc25a12, Ndufaf3, Sirt1, Rala, Slc25a30, Mcat, Tcaim, Mrpl39, Tufm, Mrpl48, Acsm2, Casp4, Rhot1, Immt, Tmx2, Acss3, Ndufv2, Pacs2, Cyp27b1, Depp1, Sucla2, Pla2g6, Msto1, Cibar1, Tomm70a, Coq4, Aco2, Oxsm, Atpsckmt, Tyms, Mtfr1l, Ndufaf6, Etfa, Abcb7, Traf3ip3, Hoga1, Mapk10, Hmgcs2, Pdpk1, Sh3bp5, Slc25a24, Fastkd3, Wwox, Ndufc1, Parl, Mrpl55, Chchd4, Armc10, Uqcrc2, G…
7	pheromone binding	1.60009	Mup5, Mup18, Mup16, Vmn1r30, Vmn1r213, Vmn1r26, Mup10, Mup3, Mup15, Vmn1r9, Vmn1r210, Vmn1r232, Vmn1r191, Mup14, Mup11
8	amino acid transmembrane transporter activity	1.49759	Slc7a2, Slc38a11, Slc7a9, Slc6a6, Slc7a12, Slc38a5, Slc36a1, Slc25a13
9	Ubiquitin-conjugating enzyme/RWD-like	1.47316	Ube2i, Rnf25, Ube2frt, Rwdd3, Wdr59, Vps37a, Cdc34b, Rwdd4a, Impact
10	mRNA processing	1.43928	Rbmx, Magohb, Mbnl3, Cstf2, Supt6, Esrp2, Mettl3, Adarb2, Ppp1r8, Cwc15, Dcps, Srsf9, Habp4, Nrde2, Prpf38a, Magoh, Snw1, Hnrnpl, Yju2, Hnrnpu, Grsf1, Rbm47, Mtrex, Srsf2, Rnps1, Ern2, Ythdc1, Cpsf7, Isy1, Srpk2, Dhx15, Lsm6, Cpeb1, Mbnl1, Ddx46, Cpsf2, Aar2, Smn1, Prpf19, Zcrb1, Prpf4, Usp39, C1qbp, Gcfc2, Armc7
11	Phox/Bem1p	1.37832	Ncf2, Tfg, Pard6g, Prkci, Ncf4
12	Sphingolipid metabolism	1.36795	Plpp2, Sphk1, Sgms1, Plpp1, Kdsr, Degs1, Smpd1, Gba2, Sgpl1, Gba1, Acer2, Sptlc3
13	excitatory synapse	1.35577	Shank3, Nrxn1, Dlg4, Srpx2, Cntnap2, Lrrtm2, Baiap2, Homer1, Nlgn1
14	G-protein coupled receptor activity	1.30234	Npbwr1, Adgrl2, Or52n4b, Or4k1, Gpr34, Mrgprf, Or8c9, Or10g1b, Glp1r, Or5t15, Or2m13, Or8g30, Vmn2r84, Vmn2r89, Or1e19, Tacr3, Mchr1, Vmn2r51, Vmn2r51, Or9g8, Gpr150, Cxcr6, Or3a1, Vmn2r16, Or52h2, Or5w19, Or52z13, Or12j5, Chrm3, Or5p50, Agtr2, Cxcr5, P2ry12, Or5p81, Gnrhr, Vmn2r77, Or9g19, Or5p54, Tas2r110, Gm10310, Or1e1c, Vmn2r102, Or4a67, Or10u3, Kiss1r, Vmn2r69, Vmn2r108, Or2ag2b, Ptgfr, Or8…
15	Cell cycle	1.30189	Zwilch, Rabgap1, Pogz, Fsd1, Pard6g, Mad1l1, Mitd1, Rcc2, Aurka, Rala, E2f7, Nsun2, Vrk1, Nupr2, Blcap, Hnrnpu, Sirt2, Nek3, Ensa, Ppm1g, Maea, Dync1h1, Cenpx, Esco2, Ankle2, Sgo2a, Foxm1, Cenps, Katna1, Nek9, Septin5, Uhrf2, Ncapd2, Fign, Ttc28, Chfr, Siah2, Lin9, Usp39, Babam1, Kif11, Brinp2, Ccsap, Sik1, Ptp4a1, Nipbl, Erh, Lig1, Ncapg2, Nrde2, Dsn1, Kntc1, Ube2i, Cdk14, Ccna2, Appl1, Usp17le,…
16	Membrane	1.27201	Bin1, Mpzl1, Ndufaf3, Slc16a4, Tnfrsf11a, Vmn1r119, Sh3gl1, Cog8, Has3, Cd160, Sh2d3c, Pex14, Cdh7, Vmn2r16, Soat2, Cyp27b1, Mfsd9, Mfsd13a, Coq4, Caly, Chrm3, Itpripl2, Bcl7c, Ncs1, Ctxn2, Slc44a3, P2ry12, Ephx1, Prf1, Tmem175, Or5p81, Fap, Cyp4a29, Apbb1ip, Slc4a2, Ctnnb1, Pdpk1, Errfi1, Tmem176b, Gad2, 4930522H14Rik, Pcdhb17, Mfsd4b1, Asap2, Armc10, Or8s5, Lima1, Icam4, Acp2, Lrp10, Dad1, Vmn1…
17	Sterile alpha motif/pointed domain	1.2486	Sash3, Samd10, Ppfia1, Anks1b, Epha7, Kazn, Epha6, Samd11, Phc1, Spdef, Shank3, Sgms1, Caskin2, Sash1, Ppfia2, Arap2
18	sodium ion transmembrane transport	1.24221	Slc6a1, Slc5a6, Slc8a3, Slc6a14, Slc6a2, Slc6a6, Slc23a2, Osr1, Slc4a4, Atp1a4, Tpcn2, Slc34a3, Slc6a19, Hcn1, Ano6, Slc9a5, Slc6a4
19	small GTPase mediated signal transduction	1.18608	Dock4, Rasgef1b, Ralgps2, Sh2d3c, Bcar3, Rasgrp1, Dock9, Arhgap32, Rhoh, Ralgds, Cdc42se1, Rac3, Rhobtb3, Gdi2, Rhot1, Rhobtb1
20	Double-stranded RNA-binding-like domain	1.1828	Drosha, Tarbp2, Adarb2, Adad1, Eif2ak2, Stau1
21	Transferase	1.16898	Mettl25, B3gntl1, Parp6, Rnf216, Sgk3, Has3, Map2k3, Nek3, Awat2, Ddr2, Soat2, Tgm6, Trim11, Oxsm, Atpsckmt, Nek9, Uhrf2, Gstm6, Arel1, Fes, Stt3b, Rbks, Epha7, Ube4b, Mapk10, Hmgcs2, Gba1, Pdpk1, Lpcat2, Nosip, Trim6, Kat8, Irf2bpl, Camk1g, Mat1a, Gtf2b, Ret, Lcmt2, Alk, St8sia4, Galnt11, Bmpr2, Sms, Tyw3, Pik3c3, Ube3d, Prkcb, Dzip3, Selenoo, B4galt2, Rnf2, Pcmtd1, Stk40, Parp10, Agpat2, Nsun2,…
22	protein localization to synapse	1.14934	Nrxn1, Dlg4, Baiap2, Homer1, Nphs1, Stau1, Nlgn1
23	Heme	1.11275	Cyp7a1, Cyp3a25, Hccs, Cyp4a29, Cyb561d1, Cyp2d26, mt-Co1, mt-Cytb, Cyp2j6, Cyp2c38, Cyba, Cyp2d34, Fads2b, Cyb561a3, Steap4, Cyp4f16, Tdo2, Cyp2c39, Cyp2c40, Cyp3a13, Cyp27b1, Cyp2j8, Cyp2b19, Cyp3a59, Cyp3a59, Ido2, Cyb5b, Cyp2d9, Hbb-bt, Gm10053, Gm10053, Steap2, Hbb-bs, Cyp3a16
24	multicellular organism development	1.10538	Sufu, Dhx36, Bin1, Nrarp, 2210016L21Rik, Lmx1a, Sirt1, Ctnnd2, Tnfrsf11a, Cdh2, Dact1, Adam24, Ryr2, Pi15, Spata20, Hnrnpu, Cited2, Ahi1, Wls, Hes5, Cdh7, Gmcl1, Ascl1, Agfg1, Ddr2, Hoxb3, Sema5a, Piwil1, Enah, Uncx, Rorb, Slco4c1, Zfp41, Gadd45b, Piwil2, Mbnl3, Ccsap, Epha7, Tmem53, Tulp3, Kazald1, Edf1, Utp25, Dcc, Nosip, Pou5f1, Ube2i, Pax5, Tbx1, Fgf1, Ovol2, Dync2h1, Etl4, Ret, Alk, Dcx, Chr…
25	Helicase, C-terminal	1.10246	Ddx23, Wrn, Dhx15, Dhx36, Ifih1, Dhx29, Ddx50, Rad54l, Skic2, Ddx46, Smarca2, Ddx4, Shprh, Mtrex, Dhx38, Ascc3, Dhx58, Srcap
26	aromatase activity	1.07889	Cyp3a25, Cyp2j6, Cyp3a59, Cyp3a59, Cyp2c38, Cyp2c39, Cyp2d9, Cyp3a13, Cyp2b19, Cyp2d26, Cyp3a16
27	Fatty acid biosynthesis	1.07857	Oxsm, Scd1, Prxl2b, Hacd1, Degs1, Fads2b, Mcat, Elovl7, Fads3, Mecr
28	Microtubule	1.07307	Ccsap, Fsd1, Rcc2, Kif3b, Aurka, Kif26a, Rassf3, Kif27, Dync1i1, Klc4, Kif14, Ttll1, Dnal1, Dnah1, Kif3c, Camsap2, Kif3a, Sirt2, Eml4, Dync2h1, Cspp1, Cep170, Kifc2, Dync1h1, Dcx, Haus4, Ttll5, Haus1, Katna1, Rmdn3, Hook2, Dnah8, Fign, Kif4, Map7, Kif11
29	Signal	1.06567	H2-M10.4, H6pd, Mpzl1, Tnfrsf11a, Otor, Glp1r, Chia1, Trav9-4, Mup15, Adamts12, Wfdc2, Trav13n-4, Trav13n-4, Cd160, Pigt, Cts3, Abca8a, Cdh7, Vmn2r16, Platr8, Ddr2, Csf3r, Itpripl2, Pmch, Ctla2b, Prf1, Kcp, Chadl, Kazald1, Retnla, Gfral, 6030468B19Rik, P3h4, Nlgn1, Reg4, Trav12d-1, Trav7-2, Pcdhb17, Tgfbi, Lama5, Trav13-2, Lipg, Trav15-2-dv6-2, Cytl1, Acp2, Icam4, Lrp10, St8sia4, Cxcl12, Cd3e, Rc…
30	cell projection organization	1.06446	Odad2, Cep89, Aurka, Ccdc13, Kif27, Cibar2, Tmem216, Ofd1, Cep83, Arl6, Dnajb13, Nubp1, Cep97, Cfap58, Gpr22, Dnaaf3, Kif3a, Cep152, Dync2h1, Hyls1, Deup1, Ahi1, Spag16, Cfl1, Cul3, Cibar1, Iqcb1, Cc2d2a, P2ry12, Akap4
31	neuron cell-cell adhesion	1.02634	Nrxn1, Tnr, Ret, Cel, Nlgn1
32	Groucho/TLE N-terminal Q-rich	1.01882	Tle5, Tle1, Tle4

## Sheet: Cluster 9
DAVID functional clustering of genes in cluster 9 of platelet transcriptome of TMEV-infected mice
Cluster #	Pathway	Enrichment Score	Gene IDs
1	Ubl conjugation	8.26414	H2bc27, Limk1, Hsp90aa1, Gfi1, Mdm2, Spin1, Atf4, Hdac5, Pex5, Foxo3, Prrc2c, Abl1, Trpm4, Pcnp, Mis18bp1, Jak2, F2rl1, Zbtb44, Scaf8, Mapk3, Celf1, Stx8, Pcgf2, Ubb, Etv5, Rictor, Apc, Rpl4, Ifit1, Bclaf1, Rptor, Rps5, Npm1, Slc9a1, Puf60, Rpl8, Ogdh, Zfp410, Ghr, Srsf6, Cetn2, Tbrg1, Nme1, Sin3b, Ubn2, Birc2, Ddx17, Sumo1, Cir1, Kif18a, Atf6, Lrrfip1, Rhot2, Tagln2, Vldlr, Usp25, Fmr1, Tspyl2, …
2	Golgi apparatus	3.60891	St3gal1, Limk1, Scap, Sdf4, Bglap2, Sppl3, Cerkl, H2-Q7, Grn, Gm8369, Arfgap1, Ephb2, Hdac5, Pex5, Rap1gap, Trpm4, Cybb, Snap29, Tenm1, Mapk3, Cabp7, Abcc4, Tg, Map6, Ptgs1, H2-Q2, Bicd2, Syap1, Psenen, Apc, B2m, Qsox1, Lrpap1, Retreg1, Mr1, Serpinb9, B3gat2, Golga1, Fmnl3, Dusp10, H2-Q10, Vps13a, Tgoln1, Gorasp2, Dbi, Scyl3, Rab7, Serinc3, Myh2, Clvs1, Ermap, Atf6, Itm2c, Slc39a11, Fut4, Galnt10…
3	endoplasmic reticulum	3.60453	Sppl3, Alg13, Ugt1a2, Osbpl8, Abl1, Mgst3, Magea10, Trpm4, Hsd11b1, Ptgs1, Triqk, H2-Q2, Rpl10-ps3, Rpl10-ps3, Pigg, Slc9a1, Eif2b2, Pdia6, Retreg2, Reep5, Myorg, Serp1, Tap1, Tor1aip2, Serinc1, Fads1, Tmem131l, Alg5, Gorasp2, Ahcyl2, Dbi, Atf6, Uggt2, Usp25, Hs1bp3, Emid1, Pofut1, Rab9, Rnf13, Syncrip, Tespa1, Yipf4, Atp11a, Pgap2, Bnip1, Plod2, Rpl10, Sec61g, Rnf19b, Prdx4, H2-Q4, Ykt6, H2-K1, …
4	lysosome	3.0962	Vps35, Ifitm1, Lgmn, C9orf72, Calcrl, Rab7, Ifitm3, Tmem106b, Grn, Itm2c, Plaat3, Chid1, Rragc, Ctsa, Clcn3, Capn2, Ctsb, Rab9, Arl8b, Rnf13, Tm6sf1, Lamp2, Fyco1, Rptor, Mtor, Psap, Abcb9, Ppt2, Vps13a, Wdr48, Lrba
5	mRNA processing	2.73579	Ptbp3, Tdrd7, Pabpc1, Prkcsh, Sfpq, Rpl14, Farsb, Rpl3, Tent5c, Tia1, Trmt2a, Rpl14-ps1, Rpl14-ps1, Sf1, Scaf8, Celf1, Raver2, Rps3, Isg20, Rpl15, Rpl4, Ifit1, Hnrnpa2b1, Ddx55, Rangap1, Ptbp2, Rps5, Npm1, Ddx18, Puf60, Rpl8, Atxn1, Ddx39b, Mrpl2, Srsf6, Zranb2, Ddx17, Eif4g3, Exosc9, Sf3b4, Ro60, Fmr1, Eif1, Morc3, Mov10l1, Gpbp1, Srek1, Syncrip, Rnmt, Mrpl1, Hnrnpdl, Hnrnpa0, Rbm25, Stau2, Lsm3…
6	adaptive immune response	2.72501	Ptprq, Trav19, H2-Q7, Ermap, Trav9n-4, Ephb2, Egflam, Trav15n-1, Igkv6-25, Crlf3, Igkc, Lrit3, Ttn, Trav15d-1-dv6d-1, H2-D1, H2-Q2, Pkhd1l1, B2m, Trdv5, Mr1, Cd7, H2-Q4, Gpcpd1, H2-K1, Plxna4, Trbc1, Pigr, H2-Q6, Lrrn3, H2-Q10, Ghr, H2-T5, Cd300a, F13a1, Tmem131l, Tgm2
7	actin binding	2.60669	Lsp1, Washc1, Kif18a, Pdlim7, Actn3, Wasf2, Fxyd5, Plec, Hip1r, Flii, Myh10, Tln2, Lasp1, Fmnl1, Utrn, Shroom4, Ywhag, Klhl1, Spta1, Capza1, Mprip, Tpm3, Pfn1, Arpc1b, Fmnl3, Gsn, Fer
8	innate immune response	2.44313	Ifitm1, Cgas, Pqbp1, Klrd1, Ifitm3, Irak1, Serinc3, Irf7, Fbxo9, Ifi27, Sfpq, Trim8, Clec7a, Chid1, Rnf166, Cybb, Jak2, F2rl1, Igkc, Isg15, Isg20, Morc3, Fcer1g, Akirin2, C1rl, Parp14, Ifit1, Btk, Uba7, B2m, C7, Sdhaf4, Mr1, Trim30d, Trim39, Trbc1, Irgm2, Fer, Sp110, Trim10, Mif, Pglyrp1, Neurl3
9	Diabetic cardiomyopathy	2.27517	C9orf72, Dctn3, mt-Co3, Smcr8, Psmd2, Atf6, Atf4, Cox7a2l, Sdhb, Casp8, Mapk9, Cybb, Mapk3, Atp5mc3, Ndufa2, Capn2, Ubb, Ndufs8, Apc, Uba7, Fzd4, Atg13, Mtor, mt-Nd2, mt-Nd5, Gpx1, Ndufb9, Cox5a, Atxn1, Ppif, Tank, Atp5mc2, Ndufa1, Tubb4b, Tuba8
10	ribonucleoprotein complex	2.22501	Tdrd7, Ddx17, Pabpc1, Rpl3, Rpl14, Tia1, Top2b, Ro60, Secisbp2l, Fmr1, Celf1, Rps3, Syncrip, Mrpl1, Rpl15, Rpl39, Rpl4, Hnrnpa2b1, Rps26, Rps5, Npm1, Hnrnpa0, Puf60, Rpl8, Dap3, Lsm3, Mrpl2, Lsm4, Srsf6, Pabpc4, Zc3h18
11	ubiquitin ligase complex	2.21493	Mkln1, Arih2, Gid8, Rnf19b, Arih1, Med21, Asb1, Wdr26, Rmnd5a, Ranbp10
12	cellular response to amino acid starvation	1.98833	Ucp2, Mapk3, Sesn2, Mtor, Atf4, Bmt2, Rragc
13	Mitochondrion	1.84191	Alas2, Etfbkmt, Hsp90aa1, mt-Co3, Tax1bp1, Acadl, Plaat3, Mrrf, Foxo3, Sdhb, Mgst3, Fech, Abl1, Ppp1cc, Atp5mc3, Slc25a16, Ndufa2, Rps3, Ubb, Ndufs8, Ucp2, Sdhaf4, mt-Nd5, Dap3, Ndufb9, Gfm2, Ogdh, Mrpl2, Ppif, Immp1l, Micos10, Slc25a38, Vps13a, Oat, Fads1, Mcl1, Wdr26, Ndufaf7, Atp5mj, Rab7, Otc, Sfxn3, Mtrf1, Rhot2, Cox10, Cox7a2l, Cpox, Usp15, Micu2, Atad1, Dguok, Mrpl1, Bnip1, Dmac1, Mtor, Tr…
14	cell cycle	1.65353	Smc4, Lrrcc1, Cdc73, Septin11, Dctn3, Tlk1, Ccndbp1, Mdm2, Cdkn2d, Spin1, Ccnt2, Racgap1, Anapc2, Ppp1cc, Pcnp, Mis18bp1, Mapk3, Tspyl2, Chaf1a, Txlng, Rps3, Arl8b, Babam2, Ccnt1, Cdt1, Pard3b, Ccne2, Wapl, Psme3, Ccnb3, Fam32a, Phf8, Mcm6, Nde1, Spout1, Ints13, Tsg101, Tbrg1, Cetn2, Rbl2, Klhl21, Dync1li1
15	BTB/POZ fold	1.64975	Kcnc1, Kctd9, Skp1, Ivns1abp, Zbtb14, Klhl1, Klhl6, Zbtb44, Zbtb3, Kctd20, Klhl28, Klhl21, Gan
16	SNARE complex	1.54145	Snap29, Bnip1, Stxbp5, Bloc1s6, Stx8, Ykt6, Vamp4, Snx4
17	Chemical carcinogenesis - reactive oxygen species	1.53861	Ndufs8, Akt2, Ptpn1, mt-Co3, mt-Nd2, mt-Nd5, Cox7a2l, Ndufb9, Sdhb, Foxo3, Cox5a, Mgst3, Mapk9, Abl1, Ppif, Mapk3, Atp5mc3, Atp5mc2, Ndufa2, Ndufa1
18	protein import into nucleus	1.53221	Fgf9, Phip, Kpna4, Kpna2, Kpna2rt, Kpna2rt, Kpna1, Akirin2, Traf3ip2
19	cellular response to DNA damage stimulus	1.52203	Cgas, Actl6a, Ercc3, Tlk1, Sfpq, Ercc6, Abl1, Morf4l1, Fmr1, Mapk3, Chaf1a, Parp2, Rps3, Babam2, Apc, Uba7, Chd2, Fam111a, Rptor, Bclaf1, Ube2b, Mtor, Wdr76, Smarcad1, Sirt4, Sgk1, Slf2, Atmin, Tank, Eya4, Endog, Cetn2, Pole, Tdg, Wdr48, Mcl1
20	Nucleotide-binding	1.46534	Ttll4, Smc4, Akt2, Limk1, Spag1, Atp6v1b2, Hsp90aa1, Irak1, Ercc3, Ttll11, Tlk1, Ephb2, Farsb, Uck1, Prkag2, Abl1, Trpm4, Top2b, Jak2, Rap1a, Myh10, Mapk3, Abcc4, Ube2h, Arl8b, Gvin2, Btk, Ddx55, Mdn1, Chd2, Cnga3, Ddx18, Mcm6, Gvin1, Gfm2, Nubp2, Ddx39b, Acss2, Camk1d, Pikfyve, Rhog, Tap1, Tubb4b, F13a1, Nme1, Tuba8, Dync1li1, Cgas, Ddx17, Rab7, Septin11, Kif18a, Ercc6, Rhot2, Rragc, Mapk9, Rnd3…
21	regulation of protein phosphorylation	1.44862	Phip, Fer, Rptor, Sesn2, Mtor, Rictor
22	WD40/YVTN repeat-like-containing domain	1.33498	Scap, Phip, Rptor, Dync1i2, Fbxw2, Ppp2r2a, Wdr76, Tbc1d31, Arpc1b, Plxna4, Stxbp5, Taf5l, Tulp4, Wdr26, Bcas3, Wdr48, Eipr1, Dmxl1, Lrba
23	phosphoprotein phosphatase activity	1.31291	Dusp10, Ublcp1, Ptpre, Ptpn1, Ptprq, Eya4, Ptpn18, Ctdnep1, Ptprr, Dusp16, Mtmr4, Ppp1cc
24	translational elongation	1.27839	mt-Tp, mt-Tt, mt-Ta, Eef1a1, mt-Tw, mt-Tc
25	Redox-active	1.24943	Qsox1, Ndufa2, Txndc17, Glrx, Sap30l, Txn1, Pdia6
26	SAND domain	1.2194	Sp110, Sp140l2, Sp100
27	Biosynthesis of cofactors	1.1503	Alas2, Cmpk1, Rfk, Pts, Dhrs3, Cmpk2, Nme1, Ugt1a2, Cox10, Cpox, Fech
28	phosphoric diester hydrolase activity	1.14294	Gde1, Gpcpd1, Mppe1, Gdpd5, Pde7a
29	adherens junction	1.11661	Apc, Pard3b, Ssx2ip, Pkp4, Fer, Cdh22, Pkp3, Pdlim7, Cdh10, Dll1, Shroom4
30	defense response to virus	1.11525	Ifi207, Ifitm1, Cgas, Pqbp1, Ifit1, Ddx17, Ifitm3, Serinc3, Irf7, Ifi27, F2rl1, Isg15, Isg20, Cnot7
31	Cyclin-like	1.11169	Ccne2, Ccnb3, Rbl2, Ccnt2, Ccnt1
32	Ubl conjugation pathway	1.09596	Birc2, Kctd9, Skp1, Commd8, Sumo1, Alg13, Fbxo9, Arih1, Mdm2, Trim8, Anapc2, Usp15, Rnf166, Socs2, Usp25, Ube2o, Ubr4, Isg15, Unkl, Ube2h, Fbxo3, Rnf13, Traf3ip2, Babam2, Gan, Fbxo34, Rlim, Zyg11b, Ube2b, Fbxw2, Rnf19b, Usp34, Zfand5, Trim39, Asb1, Rmnd5a, Usp24, Ttc39b, Arih2, Fbxo27, Socs5, Tulp4, Klhl21, Wdr48, Neurl3
33	nucleotidyltransferase activity	1.03601	Cgas, Polr2g, Rpap1, Parp2, Pcyt1b, Pole, Parp14, Tent5c, Sirt4
34	regulation of autophagy	1.01404	C9orf72, Rptor, Mtor, Chmp4b, Smcr8, Mtmr4, Rragc
35	positive regulation of proteasomal ubiquitin-dependent protein catabolic process	1.00978	Zyg11b, Gsk3a, Arih2, Rnf19b, Sumo1, Arih1, Mdm2, Socs5, Mapk9
